# Supplementary material for: A Wrapper Feature Subset Selection Method Based on Randomized Search and Multilayer Structure
Source: Biomed Res Int. 2019 Nov 4;2019:9864213. doi: 10.1155/2019/9864213 (PMC6885241; doi:10.1155/2019/9864213)
Supplement: Supplementary Materials — Public datasets: details of five public datasets (had been described in Table 3 in the paper) which are the important datasets for classification with our methods and other comparative methods. Supplymentary Tables 1 and 2: description of two algorithms (LVW and Imp-LVW) which were compared with our method in Section 3.2. [file 9864213.f1.zip]

Archive with 7 entries (6 files):
- 9864213.f1/20190426-supplymentary table1-2.docx
- 9864213.f1/public datasets/
- 9864213.f1/public datasets/breast49.csv
- 9864213.f1/public datasets/CNS7129.csv
- 9864213.f1/public datasets/ColonCancer.csv
- 9864213.f1/public datasets/hepato.csv
- 9864213.f1/public datasets/Leukemia.csv
