# Supplementary material for: A Wrapper Feature Subset Selection Method Based on Randomized Search and Multilayer Structure
Source: Biomed Res Int. 2019 Nov 4;2019:9864213. doi: 10.1155/2019/9864213 (PMC6885241; doi:10.1155/2019/9864213)
Supplement: Supplementary Materials — Public datasets: details of five public datasets (had been described in Table 3 in the paper) which are the important datasets for classification with our methods and other comparative methods. Supplymentary Tables 1 and 2: description of two algorithms (LVW and Imp-LVW) which were compared with our method in Section 3.2. [file 9864213.f1.zip › 9864213.f1/20190426-supplymentary table1-2.docx]

TABLE 1
Description of LVW

| Algorithm: LVW  Input:  dataset *X*;  input feature set *F*;  maximum loop number  Begin  *;*  *;*  *d*=21;  *t=0;*  *;*  Initialize feature weight *w*, for each*,* (where |*w*|=|*F*|);  For *loopnum*=1: *T*  generate feature subset with 21 features by feature weights using randomize method;  delete duplicate features from    *E’* is the classification accuracy of on SVM model;  If *()||((E’=E)&&(d’<d))*  *t=0;*  *E=E’;*  *d=d’;*  *;*  endif  *t=t+1;*  if *t==* break;  endfor  return *F**;  End |
| --- |

TABLE 1
Description of imp-LVW

| Algorithm: Imp-LVW  Input:  dataset *X*;  input feature set *F*;  maximum loop number  Begin  *;*  *d*=21;  Initialize feature weight *w*, for each*,* (where |*w*|=|*F*|);  generate twenty-one feature subsets by feature weights using randomize method;  calculate the weight value of each feature *f* using    where  is the classification accuracy of subset *m* with SVM model);  For *loopnum*=1: *T*  generate feature subset with 21 features by feature weights using randomize method;  delete duplicate features from ;    *E’* is the classification accuracy of on SVM model;  If *()||((E’=E)&&(d’<d))*  *t=0;*  *E=E’;*  *d=d’;*  *;*  *=;*  endif  *t=t+1;*  if *t==* break;  endfor  return *F**;  End |
| --- |
