# Supplementary material for: A Wrapper Feature Subset Selection Method Based on Randomized Search and Multilayer Structure
Source: Biomed Res Int. 2019 Nov 4;2019:9864213. doi: 10.1155/2019/9864213 (PMC6885241; doi:10.1155/2019/9864213)
Supplement: Supplementary Materials — Public datasets: details of five public datasets (had been described in Table 3 in the paper) which are the important datasets for classification with our methods and other comparative methods. Supplymentary Tables 1 and 2: description of two algorithms (LVW and Imp-LVW) which were compared with our method in Section 3.2. [file 9864213.f1.zip › 9864213.f1/public datasets/breast49.csv]

ID	1	1	1	1	1	1	1	1	1	1	1	1	1	1	1	1	1	1	1	1	1	1	1	1	1	2	2	2	2	2	2	2	2	2	2	2	2	2	2	2	2	2	2	2	2	2	2	2	2
1	394	547	228	226	270	223	214	303	200	291	23	61	308	280	785	382	271	2397	627	473	263	242	1473	3490	573	859	346	320	704	399	393	665	313	568	250	407	148	232	362	261	368	383	238	132	-62	229	116	506	399
2	128	98	69	102	34	110	50	86	69	235	33	-6	107	384	801	-82	-91	984	877	581	282	136	1357	842	658	-136	64	90	497	138	-28	361	190	593	282	148	85	-62	74	69	19	128	101	34	71	290	104	630	343
3	205	635	227	487	377	631	1546	768	1697	1419	383	324	349	484	287	327	97	1992	614	485	396	505	1750	973	1692	841	313	1181	1432	512	277	895	65	1592	767	332	1899	167	569	447	435	399	963	378	230	526	686	1074	669
4	345	1168	90	674	479	2204	739	1964	2923	1858	1359	581	901	852	1366	969	331	2916	1471	1579	1918	1320	1812	5411	1287	1113	393	153	486	981	412	1247	254	924	241	430	189	221	269	361	100	378	270	129	698	433	434	982	425
5	-18	9	13	28	112	15	8	140	-36	72	9	52	-5	-29	906	-9	-69	133	215	10	155	22	97	190	102	167	18	173	214	-25	1	-56	11	41	-5	62	63	-78	8	23	-41	15	-20	-11	40	103	-50	-16	-46
6	-84	75	91	80	-202	172	-9	239	40	527	40	76	94	-45	205	-86	-33	-481	722	651	546	314	2031	1367	640	46	-23	226	138	233	-25	408	79	914	279	317	-33	-26	115	79	102	311	43	78	-118	222	365	369	487
7	-455	-148	-13	-17	-405	-35	89	-323	-86	-86	-141	114	-147	-249	-1100	-117	-163	-2205	-547	-151	-18	-109	-60	-257	-125	-2366	-38	135	-498	-262	-354	-263	-184	-169	-166	-178	-283	-298	-155	-304	-234	-16	-99	-175	18	-364	-201	-24	1
8	114	131	25	62	-71	199	49	-3	103	386	52	-38	47	73	-167	91	34	862	1033	609	371	200	2220	612	573	-261	43	185	316	257	-9	242	229	513	344	261	33	87	235	73	139	73	70	-5	165	271	201	344	321
9	198	303	145	210	214	1925	214	863	1218	389	146	81	108	129	729	201	233	1543	981	608	422	371	3349	1033	550	684	65	187	682	321	362	436	432	713	374	597	271	156	408	223	258	123	200	119	166	448	631	283	373
10	2192	2291	1167	1340	1224	1713	1293	1591	1750	1798	1484	1294	844	1321	2014	1629	1809	4718	2729	1546	1671	1564	3849	2786	1656	1832	1166	1243	3135	2746	1822	1909	1603	1768	994	2007	1431	1659	2512	1948	1169	1319	1592	788	1125	2145	1401	1338	895
11	123	204	25	-12	-182	120	-55	327	91	269	16	35	49	13	715	107	51	867	493	510	714	102	3511	785	455	-372	24	211	540	247	39	273	424	568	202	191	6	75	149	6	104	-22	216	30	118	52	59	153	305
12	351	869	699	69	311	267	259	300	508	854	517	341	512	574	-92	245	276	4259	1011	932	749	727	1308	924	979	3513	276	418	1193	544	371	301	374	845	370	1194	619	379	192	364	384	393	448	97	679	1027	916	343	409
13	-506	-468	-348	-611	-543	-286	-437	-479	-484	-324	-384	-509	-264	-672	792	-888	-1173	-1075	-1244	22	-204	-442	679	-111	18	-1298	-584	-377	-1175	-830	-972	-1690	-588	156	-393	-664	-376	-800	-1413	-741	-619	-480	-583	-331	-295	-831	-217	-387	-1079
14	-427	-701	-593	-600	-1354	-235	-816	-857	-13	-190	-202	-500	-55	-134	934	-122	-685	-4086	-4525	179	4	-203	532	-184	14	-939	-317	-533	-1787	-883	-711	-1045	-57	281	10	-263	-341	-699	-878	-457	-472	-292	-370	-133	-350	-467	24	-212	620
15	1499	1776	1640	711	371	812	996	1298	754	1336	1040	1114	594	764	557	300	386	1473	1518	1228	1601	1138	1762	2208	1132	779	457	718	535	1370	88	1155	1168	1456	892	319	38	1059	775	118	459	497	417	279	274	1030	1070	492	777
16	335	442	458	-479	202	276	785	-173	301	3	1690	827	508	426	311	-279	-441	1066	1188	292	345	998	1350	2089	710	1744	249	46	-42	-203	-302	87	104	-9	304	420	-180	-683	-288	-220	-225	303	-131	-169	4522	-274	-229	14	302
17	-11	-75	19	-8	111	-9	-74	0	-8	-40	-64	38	-27	-118	-542	-275	-252	808	119	-68	-12	-96	65	35	-148	-228	32	19	-268	57	-102	28	-115	-37	-59	-71	-14	4	178	2	18	73	-8	-49	-30	-114	103	-65	202
18	73	-367	-149	-717	-94	-357	-529	188	-218	154	-182	-333	223	-548	-148	86	-1020	1509	1953	644	170	-293	618	1255	109	-782	-520	-234	-305	-405	-1093	-725	-375	647	-8	235	-445	-226	-1413	-992	-391	-388	-193	-211	119	-14	172	-468	-106
19	-144	35	-80	-308	-49	-90	-141	-53	5	103	-56	-132	255	30	-202	-814	-26	-920	231	360	77	197	1015	1872	519	-1265	-81	20	480	-74	76	33	59	329	291	44	-70	48	-361	-185	129	33	135	-44	59	436	61	251	74
20	-8	-56	-35	34	79	-55	8	-110	-19	188	-7	52	283	-4	1147	26	184	211	669	410	150	244	1194	2323	539	-170	199	-18	13	-171	-11	59	268	323	359	296	-82	75	-140	33	17	30	-42	108	-6	251	128	204	207
21	238	131	186	1	193	163	130	269	138	405	58	59	409	69	544	162	173	3028	1179	405	352	229	1301	1615	826	317	98	277	619	246	35	241	395	402	378	382	193	89	200	27	135	245	287	-15	231	392	462	179	277
22	907	643	914	298	212	861	327	650	945	1134	687	666	802	261	1442	773	320	3102	1258	1369	1011	904	1856	3405	1928	227	207	1110	820	872	245	409	1093	878	813	842	275	588	465	191	360	907	487	103	629	758	766	478	486
23	1545	1512	2180	845	603	1111	932	993	1298	819	820	584	1204	822	1388	1063	654	4333	4092	804	1175	973	1826	3294	1322	4624	1698	935	2565	1691	1059	1710	893	952	853	1229	720	1159	1820	961	436	1071	824	380	693	1127	852	468	1218
24	-76	378	120	-194	148	65	-29	-60	16	110	-46	15	141	36	15	-166	-192	5319	1106	275	99	96	1757	5818	358	348	-179	41	311	-25	-115	-86	265	262	175	113	-96	64	-179	-94	-32	128	76	90	-42	146	703	407	745
25	197	286	261	169	231	238	208	182	135	398	368	114	301	1089	2039	12	149	295	276	406	161	253	988	629	362	221	117	339	74	256	166	491	286	341	342	276	282	389	72	177	70	100	215	134	265	429	529	225	292
26	803	685	473	-175	731	827	-317	230	550	731	821	449	485	930	495	1075	843	-495	-701	803	471	1147	1500	934	1061	561	527	574	-131	536	665	166	1199	471	200	1627	416	1043	906	900	378	489	303	1024	924	633	1257	887	674
27	662	499	824	805	1045	417	323	782	435	499	443	577	1088	525	2065	804	826	960	716	297	481	798	1642	811	247	209	1168	498	429	1294	1003	815	312	404	596	559	1062	718	743	410	650	352	1191	274	791	1079	383	342	851
28	772	672	1059	877	2321	894	766	928	973	789	935	1302	1154	699	2763	1133	1450	1577	2130	1187	1004	1107	185	1303	1076	896	796	845	979	942	1187	601	786	695	995	1711	1120	1170	630	619	918	852	896	713	1098	1678	942	584	599
29	54	192	289	-13	119	-10	68	59	58	146	53	140	72	6	487	-33	280	1521	594	29	90	266	295	107	152	-44	51	44	-31	2	-7	-78	31	190	83	57	37	152	58	140	37	8	45	-19	-17	56	138	107	17
30	47	39	10	-29	-178	364	-57	-38	-25	88	-17	-3	-69	-95	474	-14	-75	-1694	-681	51	34	2	310	77	-26	-699	-31	7	21	-48	-26	-15	6	151	44	161	27	133	-128	43	-1	-7	-45	11	-2	103	45	-25	-19
31	251	271	504	455	339	465	333	322	302	832	564	416	253	739	-109	427	341	1045	1009	1687	336	746	962	1720	821	141	98	260	281	282	184	330	405	964	351	966	331	219	130	295	234	369	444	290	780	857	576	357	649
32	1094	1650	917	677	866	1486	1344	857	1352	1623	2467	2856	1160	1737	1115	1272	1727	1605	828	3590	1775	2989	2362	1630	1288	2177	670	983	1037	818	1187	1588	2043	2477	1286	2559	1561	1582	1446	1273	1055	1179	752	675	3343	3724	1484	1497	2108
33	106	193	-34	2	-258	133	-17	59	-165	108	44	109	37	106	712	103	66	360	-892	139	73	67	-38	285	120	-250	21	129	136	98	212	20	202	195	12	-103	72	205	46	175	-30	-335	-58	90	63	58	135	198	188
34	19731	10295	13941	19927	14515	11456	10862	12740	14454	11854	6300	11217	18917	14930	11391	12672	22863	24547	21920	22286	16237	7439	17086	12702	15389	3720	15860	10851	7890	20902	17289	12634	7972	4580	14390	12573	15397	14620	19626	19494	11672	8143	10614	19873	10642	37168	21364	16342	16842
35	913	694	830	902	955	845	1043	1196	947	952	736	1692	927	1285	2375	1461	1703	3265	2127	904	684	1200	1751	816	534	1938	1022	330	1577	642	1616	593	835	636	472	445	1152	1758	1340	1588	1006	1541	1155	1154	733	617	450	1465	714
36	2588	2032	1211	490	950	1369	2307	1131	1923	658	1284	1502	997	911	761	505	903	1409	896	623	944	1664	1511	1260	782	1040	848	1724	1213	1067	1628	891	1977	1623	1506	1183	1533	1323	1708	4710	1149	1642	2086	1045	1045	1267	1135	1101	613
37	315	354	542	162	160	206	238	194	330	384	394	661	255	173	227	49	234	1252	189	230	787	813	626	310	314	351	36	408	423	252	168	591	420	925	436	840	325	259	160	250	95	231	397	382	816	585	775	290	186
38	806	922	1395	454	874	892	1175	792	965	939	785	1254	596	847	1240	668	294	1839	480	1035	1535	918	720	873	962	1512	942	561	1724	539	662	839	751	610	797	479	448	1254	711	813	421	489	346	415	1068	930	1058	798	1263
39	188	259	162	125	337	92	63	141	178	201	272	365	187	251	797	161	115	1371	834	126	253	299	833	107	234	193	55	89	552	142	217	193	130	599	301	857	110	92	771	160	214	205	224	134	297	346	516	338	295
40	1202	1387	1141	431	361	419	592	497	712	743	899	732	454	574	962	563	685	1766	500	513	827	938	1625	910	1011	1094	433	443	903	688	519	1342	422	1534	731	862	429	688	972	359	458	378	821	307	1005	1179	975	497	259
41	-62	-60	-72	-143	-177	-25	-58	-73	-51	-48	-87	-48	-49	-7	-11	-76	-34	-951	-301	-65	-25	-72	-182	-43	-48	-204	42	-18	75	-98	-110	-43	-32	11	-46	-23	-31	-19	-178	-34	1	-43	42	-12	-1	-41	-60	-94	-100
42	601	797	848	515	543	485	607	238	406	752	643	418	358	528	757	439	601	1878	1559	429	796	603	819	676	790	1381	528	603	986	1140	554	656	568	554	356	709	416	822	1146	425	426	426	718	311	677	846	553	378	417
43	243	123	196	126	258	59	40	42	1	86	53	112	72	128	1945	234	360	-77	-40	38	136	76	-113	-156	24	76	43	222	458	134	190	187	164	20	30	239	83	118	155	126	53	190	220	268	111	-153	427	268	169
44	1909	1531	1211	3369	4727	1676	2586	2003	1429	3185	2075	2263	2150	1776	4681	2307	3884	5716	4716	1604	1411	2417	1893	2629	4830	6801	3515	2387	2137	2881	4007	2072	1615	1390	3578	2551	5638	2556	3072	2811	1708	1833	2950	3708	1774	2014	3243	2782	2169
45	194	232	586	510	715	215	147	62	343	629	165	173	208	302	2023	117	134	-4419	-2004	104	261	215	506	319	311	1050	322	262	671	169	250	462	249	268	147	191	195	135	372	153	207	497	340	328	277	243	199	147	360
46	-57	-74	-66	-5	-140	-91	-55	-126	-30	-12	7	-60	-19	-90	-182	-143	5	-494	-192	-93	-35	-101	169	165	92	-243	-29	158	-241	-7	-205	-67	122	27	-12	-21	-43	-73	-179	-45	-60	38	-55	5	-181	-135	-49	23	-21
47	18	60	8	-5	-143	-12	-22	-13	53	11	-9	-38	132	0	1259	2	177	1135	61	-22	-14	-18	278	207	160	-118	-31	18	54	65	-9	-18	69	98	47	12	-4	-49	-38	-23	-72	70	-4	-20	16	10	130	93	21
48	245	270	333	420	268	72	195	108	393	236	411	320	185	629	754	174	520	925	738	180	385	495	228	459	186	2685	269	298	-528	528	129	229	469	292	189	334	116	172	173	298	432	309	65	-16	226	172	84	531	144
49	1239	749	897	553	333	858	801	530	594	470	493	589	712	654	960	650	760	1706	623	510	518	548	656	587	656	644	497	723	734	580	448	732	548	655	327	460	328	752	625	499	492	907	380	283	537	694	507	217	327
50	440	210	300	145	215	193	131	214	284	164	170	189	200	251	949	304	330	1147	870	175	221	194	357	222	199	286	253	371	802	437	145	274	178	134	144	194	137	335	504	167	108	102	79	47	205	210	169	178	92
51	-26	26	-26	-53	-152	25	-38	50	-2	20	-11	8	186	-44	-321	16	-87	635	567	3	34	28	280	361	149	-35	111	-17	201	58	25	-53	96	27	46	2	101	-77	18	12	-76	-195	43	-62	-13	97	83	69	69
52	197	307	244	23	50	201	13	38	100	157	144	37	211	11	416	141	73	2931	399	72	256	68	202	200	274	262	188	299	726	165	70	171	162	136	53	120	118	147	269	27	15	75	31	14	85	102	144	71	71
53	-66	-508	-144	-61	-167	-237	41	-80	-399	-205	-61	-37	-31	-112	124	-158	-223	-1276	-554	-199	-199	-278	-231	-877	-124	-862	-138	713	-791	-168	-67	-601	127	359	1155	-60	-43	-542	-523	-144	-199	-234	405	159	-291	476	65	-7	303
54	407	240	197	114	247	595	173	93	298	373	796	583	966	515	-219	257	28	2846	823	1556	181	730	783	781	287	301	94	62	135	404	191	375	758	734	324	600	320	105	86	119	169	24	72	-99	322	405	287	284	399
55	4234	3650	2006	6971	3861	4421	3509	3240	4656	5048	4673	7262	11125	7688	7830	4580	5419	4543	3311	6779	3351	6098	3744	6240	2850	4240	4019	2030	3003	7184	7207	1824	6183	4937	3050	9635	6480	4164	4583	3447	2111	2620	2752	1826	4085	4617	3307	3867	6151
56	-8	-48	46	148	-212	90	98	17	36	5	-6	-4	21	27	-613	105	168	-53	-830	68	64	347	-23	-2	16	-1284	73	7	27	-138	47	118	136	63	51	13	-74	27	-253	137	-39	41	33	180	5	133	-106	6	-335
57	14	-162	-20	25	-101	-42	-47	49	-7	6	-18	-7	-29	54	-203	33	-15	-1110	-575	-57	-37	-98	40	-18	-18	-91	-11	-36	-218	3	-57	-52	21	-18	-21	3	37	-27	-16	-47	20	-11	-70	41	-22	-106	-36	18	32
58	-395	-176	-208	-485	938	-31	-26	-353	-143	-415	-178	30	-229	-209	-733	-556	-34	2301	3267	-288	-228	-565	-406	-452	-409	-1400	-126	-95	-408	-221	-597	-209	-129	-365	-340	-364	-301	-312	-525	-470	-548	-150	-418	-80	-148	-676	-413	-265	-298
59	4	-25	-40	-93	17	-5	20	65	-3	-16	34	-39	42	95	-1100	109	-50	360	72	31	63	20	121	23	74	-104	85	8	4	-41	32	51	-48	11	29	23	-56	30	116	-65	-26	84	-41	-59	18	-17	62	4	-64
60	5959	8000	4490	6162	3119	5837	5084	4104	7032	4656	5184	3933	5258	4636	4880	3099	4663	2954	2035	6615	6854	3932	6103	3173	4464	2038	3833	3638	8959	10733	3959	3101	2951	1946	6060	9400	4952	2621	10924	7375	5794	3826	3089	4358	6275	7362	6090	3509	4790
61	504	441	349	436	561	593	315	217	549	422	340	404	329	558	1153	462	689	1717	736	408	387	656	128	348	368	1002	334	383	1100	654	558	141	395	264	160	659	639	968	628	228	410	478	324	336	540	252	267	650	155
62	-1025	-563	-615	-820	-835	-253	-555	-521	-646	-738	-621	-395	-218	-466	-768	-294	-518	-2643	-4657	-832	-666	-467	-1270	-1170	-737	-1065	-308	-796	-3658	-246	-1448	-1656	-231	-411	-453	-719	-956	-805	-299	-1200	-1263	-1057	-737	-816	-471	-1667	-892	-183	-232
63	570	448	509	344	3	568	404	584	1086	540	567	511	483	471	-201	64	339	-213	-132	921	781	697	1190	505	509	-423	375	444	799	1019	146	270	346	598	831	941	471	291	788	699	307	-15	200	218	453	964	831	542	391
64	-138	-38	-47	-39	-33	-75	-37	-14	-124	-69	73	4	90	-97	-885	-57	-80	-458	-488	34	-42	42	132	82	-45	-95	1	-98	-240	-105	-53	-17	-115	2	203	7	8	128	43	8	109	23	-77	-20	17	156	29	63	-16
65	-5	31	-46	-66	47	-126	-152	-31	-60	-19	-47	-165	-110	-206	105	-322	-322	-166	-290	4	-94	-148	-152	-83	-66	-231	-170	-276	33	-36	-134	-811	-76	-163	57	-119	-10	36	-361	2	-135	-202	75	37	-20	77	-230	-44	60
66	255	453	408	161	94	278	170	390	470	175	338	348	332	264	-679	126	472	623	-4734	318	327	334	168	163	233	247	346	320	318	264	385	334	93	182	393	200	311	433	311	509	253	241	221	360	802	349	378	172	185
67	104	173	155	40	261	75	65	63	104	167	124	118	36	84	463	243	323	283	426	121	105	234	98	97	32	217	148	147	267	85	216	197	167	186	120	185	37	143	325	151	35	185	10	108	65	123	105	123	623
68	259	1052	976	707	658	532	117	452	462	119	12	338	263	235	1477	55	949	966	1199	155	68	550	233	78	533	266	552	692	785	1208	944	106	557	238	64	833	422	404	823	409	448	634	265	462	208	24	70	535	368
69	-1061	314	397	153	-1525	93	-335	-501	66	-128	-150	658	111	-160	-1162	-675	-521	-2972	-5099	29	802	138	-218	-397	-118	1078	-303	105	-1486	-443	92	140	38	55	116	-733	-117	-196	-342	-17	-536	-43	-160	492	-399	547	-4	-44	-5
70	52	623	254	286	-150	309	84	210	362	-523	555	124	51	-218	-2393	-193	-274	10272	6289	360	-146	507	719	-186	111	-32	427	-254	-346	391	231	5	-202	183	1045	-299	-129	107	-1322	2129	440	-126	-187	-124	211	223	382	-604	132
71	355	376	875	287	-187	115	395	442	634	496	1069	642	414	393	-1487	120	245	112	345	769	1498	562	1215	486	309	-869	583	224	329	690	287	287	509	2146	1457	2093	958	305	1058	455	584	290	492	159	1088	1404	1490	440	708
72	138	466	260	-35	-133	130	103	101	182	71	135	33	177	276	2	-20	248	-838	-451	78	153	13	181	455	78	-409	31	-35	396	245	163	-118	123	108	38	124	48	156	138	87	161	221	132	116	97	106	110	108	46
73	2307	148	211	356	-71	640	555	1623	646	266	1940	504	996	569	217	159	534	-783	-864	631	3626	433	-215	-31	285	439	3130	1254	-247	-26	647	106	217	360	1519	204	286	163	2329	120	290	816	253	289	68	-20	710	191	229
74	424	180	455	13	814	453	253	283	177	269	528	465	172	157	283	261	-83	230	-163	471	889	366	16	242	125	-123	224	225	-220	58	55	328	336	415	55	131	64	276	153	59	148	641	159	19	290	216	488	163	98
75	109	1073	228	58	-173	385	103	65	-53	86	268	51	121	22	97	104	-425	-177	-923	229	118	39	4	-145	-1	37	408	-252	-994	53	-102	-10	18	-56	-99	-124	7	-204	-126	188	20	-397	-66	-25	63	-111	-172	-154	-185
76	-633	-508	-448	-202	-774	-171	-241	-606	-136	7	-392	-194	-249	-236	-1143	-281	-68	-5361	-4452	-375	-283	-128	-70	-158	-199	-3358	355	-265	-202	-299	-188	-329	-110	-486	-106	-154	108	506	-576	-405	221	128	171	331	-265	-222	95	-4	270
77	-5	14	229	-28	47	170	73	103	49	57	93	57	187	28	69	3	1	-1196	-181	148	22	-13	78	90	20	-109	201	22	271	81	88	61	-28	191	57	51	9	211	-79	-33	53	26	1	-9	76	521	115	14	82
78	-386	119	-205	-132	-438	25	-448	-177	70	59	-70	64	337	-233	-923	-235	-251	-1644	-1086	147	274	195	79	0	88	438	-342	-152	-980	-366	-506	-308	-254	78	221	-59	-299	-310	-201	-80	-366	-117	-3	90	-62	340	154	-250	-191
79	369	-345	233	-61	65	-121	-33	153	-28	141	622	149	291	45	796	104	304	1453	228	291	626	455	1358	510	224	879	202	-23	714	-112	295	-39	159	291	110	-89	48	1463	234	90	392	266	-7	38	463	689	659	77	365
80	1527	1510	1278	991	617	1109	1140	905	960	1499	1075	960	805	1328	470	1461	429	-4260	-439	1187	539	530	445	1126	878	-86	745	1193	2192	1137	1114	1750	1180	649	634	1023	1193	522	1074	1053	1097	783	974	999	374	1804	956	341	486
81	-29	441	-88	-87	110	-65	248	-87	-23	-69	85	-32	-27	234	-553	9	-13	-18	99	138	17	-95	28	-25	-164	-130	-83	-114	-79	-26	-21	53	12	5	-39	-47	-133	-150	-157	-68	-42	32	-159	-136	-29	-123	-55	11	-110
82	-310	-104	-33	-412	-500	-1	-28	-457	-383	-181	30	-318	-307	-249	-930	388	-83	1161	-2532	-118	131	124	-520	-413	-58	-1237	-248	-101	-555	-269	-319	-441	-155	-35	-247	-58	-365	-117	514	-247	-7	-10	-48	-323	-123	-253	61	-255	-48
83	1265	-267	1365	281	325	-66	445	290	393	334	263	158	530	182	1663	-108	369	4290	2313	179	709	1569	354	436	396	2826	384	-137	369	185	1694	257	1631	251	264	712	481	756	620	198	494	1487	216	184	1278	331	447	674	317
84	771	317	783	1081	2	1003	93	345	679	1270	713	1425	567	602	308	959	1271	-6160	-8279	430	634	842	1169	117	502	-1385	718	435	844	782	1737	20	918	52	134	796	630	851	365	394	586	414	603	659	139	-518	432	1207	838
85	255	407	307	320	380	809	1502	465	217	653	267	427	214	317	960	1816	898	-441	-260	172	199	301	192	136	214	1496	246	154	136	349	1254	111	80	364	177	251	151	139	350	82	74	-88	857	103	195	226	532	136	2862
86	1	-2	-70	-16	-114	-45	-1	-57	-7	-13	-42	-10	-20	1	-85	58	-161	109	398	-46	-43	-61	-109	-66	-114	199	-45	-125	-306	55	-31	-65	81	-61	-16	-22	-66	-40	-87	-28	-13	-6	-65	-101	-65	-124	-22	16	-92
87	-145	-115	-90	-147	-1	-189	-91	-52	-76	-130	-54	-66	-37	-48	-219	-81	-165	-1124	-205	-46	-27	0	-197	-45	-124	-114	-113	-138	-135	-164	-94	-132	-64	-64	-33	-131	-170	-67	-371	-193	-68	-123	-62	-27	-106	-75	-92	-71	-16
88	177	220	278	317	339	418	350	228	370	360	285	304	332	253	-64	272	200	-524	-337	616	646	290	827	682	222	165	164	390	693	304	234	443	319	492	620	686	359	327	614	553	355	283	357	292	328	429	549	388	486
89	528	-275	51	360	2953	57	58	296	133	60	309	398	302	298	-23	167	273	13735	11333	177	190	125	42	37	268	2949	314	308	-228	21	367	-194	348	72	142	520	245	373	-47	182	228	60	189	38	80	127	292	288	-93
90	341	397	168	201	234	129	210	167	329	373	300	250	175	329	170	124	462	2053	1479	113	182	398	512	188	308	2208	218	306	796	390	439	363	280	122	233	407	464	-21	507	416	188	379	191	59	366	417	280	303	239
91	335	260	-89	332	-235	137	-52	274	171	410	229	105	-5	242	1296	199	-149	615	309	36	250	149	-198	175	252	-1017	63	389	139	279	543	170	-88	-70	31	179	163	-343	-344	92	123	73	166	183	-44	129	-119	278	55
92	23	106	132	-10	7	51	-46	70	63	97	20	14	-50	115	418	106	11	313	249	219	152	81	197	108	211	-46	56	49	128	52	22	77	58	185	75	75	-32	-130	19	82	-4	9	-9	94	157	25	97	91	158
93	33	111	145	132	21	9	14	62	70	271	85	133	24	62	1695	-33	20	298	600	185	284	194	338	299	236	165	24	100	118	118	68	97	119	323	129	258	46	-1	232	101	70	156	87	13	11	198	119	79	85
94	-104	-6	-96	-39	168	-68	-31	-92	-43	-95	-74	-6	8	-46	59	-68	-66	1009	-275	2	-31	-93	22	32	32	-131	-131	-73	-163	-155	-158	-115	-92	-35	-29	-64	-27	-222	-100	-83	14	-28	-28	-151	-80	149	20	18	-36
95	714	830	779	913	964	518	1199	1270	579	605	699	671	490	534	730	1056	843	4989	2706	686	556	368	905	623	1014	2226	1017	1395	1316	1048	605	2013	1036	896	888	1180	677	2268	1433	878	2073	769	1247	481	941	1419	1189	494	1230
96	250	350	352	152	53	44	375	404	266	179	327	284	264	486	264	111	507	-384	534	253	267	123	163	374	269	371	367	192	37	210	492	389	604	400	230	118	258	404	622	557	371	101	322	126	348	239	182	209	337
97	1452	1286	1093	960	-1838	677	883	2448	524	524	688	2576	1531	1170	581	1623	1750	-14560	-21384	684	1718	2554	2418	1174	2244	702	1248	1907	1595	1187	927	2185	2348	1831	1019	1763	905	2659	560	697	703	526	698	390	814	1855	699	1051	1742
98	731	1005	1013	1078	387	653	453	738	958	789	880	541	778	667	676	712	853	665	1274	469	1159	806	433	239	793	1928	918	861	2476	417	1321	486	505	1279	1273	1259	180	2250	911	439	1634	1269	913	570	785	776	708	533	738
99	200	367	415	348	507	21	362	342	841	338	508	831	149	323	1903	317	530	1270	1301	414	384	755	1764	104	84	335	987	119	6	357	650	469	497	555	281	721	377	1305	799	210	1080	1371	383	314	589	279	266	787	513
100	-378	-155	29	63	-86	-44	-22	-380	36	-84	-71	-323	-343	-232	792	-50	-261	1016	-814	-265	-19	-10	-200	-358	-151	-1599	37	-152	-97	-144	-384	-525	37	336	89	-174	-141	69	-725	-378	-45	-286	-47	27	-93	-175	-119	44	156
101	65	92	107	40	-41	59	41	170	84	69	132	143	120	57	202	-47	81	2312	204	105	106	195	116	99	151	17	196	53	158	81	-3	117	29	82	-17	260	-97	53	369	51	-110	186	232	-68	200	173	227	72	68
102	472	438	438	306	69	316	24	-29	549	153	139	142	165	194	-937	222	23	-755	-165	174	198	161	168	37	62	-61	433	419	64	239	104	65	77	156	117	30	121	215	95	215	50	379	83	170	141	243	62	135	93
103	1152	477	626	302	45	480	362	372	1067	467	716	389	316	333	-775	293	341	1231	650	679	1011	439	666	459	420	311	217	730	976	416	209	532	428	579	1060	967	229	557	260	386	566	664	253	41	1341	829	1287	245	436
104	18	129	14	-34	587	442	776	94	570	216	176	354	210	185	850	-133	-5	2256	936	-131	276	233	675	163	1120	107	124	1221	322	-28	697	234	177	1494	1500	57	634	290	-92	513	376	877	1101	242	77	1221	1055	150	341
105	264	184	479	180	322	412	211	178	664	28	226	209	125	238	-20	300	208	1349	574	100	134	184	311	165	83	523	362	149	178	249	220	460	91	136	284	187	243	506	36	494	246	320	195	107	412	189	192	113	223
106	515	772	909	1223	538	1129	404	742	726	476	742	437	567	1386	742	1086	933	994	355	729	1154	1078	1525	616	1128	335	327	486	1799	2676	309	871	361	465	286	993	814	381	1249	1070	1050	916	1236	196	641	607	429	297	69
107	1103	2387	1191	2245	823	1648	1374	1450	1464	1264	1136	1047	1714	1591	1878	1843	2219	2649	-89	756	878	921	1260	1567	529	497	1172	1059	2024	1693	1591	2351	965	637	470	1332	2054	1691	1954	1311	1329	1461	1130	1337	711	745	730	1837	1225
108	-15	4	10	34	-56	116	-2	-58	33	150	1117	68	490	110	-63	-112	53	-510	-356	262	486	310	123	175	149	12	-3	42	-294	-109	-36	-39	120	290	115	-10	-33	17	-128	-17	-135	95	40	40	28	158	95	12	181
109	212	897	450	-8	-344	1185	79	46	550	374	581	509	514	933	1348	446	855	-2883	694	829	790	1163	375	1149	234	-2670	170	372	381	449	716	741	1179	1337	433	430	1034	1005	569	734	899	359	791	853	115	608	523	751	1714
110	175	-329	309	178	4	148	313	164	360	375	1121	300	205	207	-819	-73	409	-3584	-2759	228	299	290	322	739	253	424	91	258	-853	-51	165	363	88	806	168	225	335	755	215	112	299	-22	98	275	75	742	612	320	294
111	55	125	297	211	289	176	311	122	125	69	180	201	110	98	-96	127	229	-65	314	201	199	253	234	231	60	-59	132	387	474	136	67	77	74	74	167	190	164	122	241	-61	34	139	139	185	208	316	73	24	107
112	-60	-662	-392	-236	-231	-611	-214	-386	-64	-136	-41	51	-153	-236	-2104	-376	73	-3365	-3383	-686	-829	-84	56	-221	-235	412	-87	-159	-1395	-691	12	-591	-312	-124	-177	-134	-228	-147	-1308	-320	-378	-1043	-798	-481	-186	-313	-110	-1	-356
113	-137	-708	-228	-301	54	-771	-573	-639	-114	-170	25	17	-15	-87	-2884	-632	-126	-5788	-4303	-672	-550	-165	-21	-28	-135	711	-94	224	-2642	-867	-222	-333	-104	99	-150	113	-259	-298	-567	-819	-535	-668	-639	-380	-103	-375	21	-190	-228
114	246	-321	295	204	345	-260	10	149	361	1172	1029	215	51	118	-267	-166	422	-1386	-737	303	373	718	176	28	813	-689	244	488	-301	155	903	158	653	575	514	258	166	554	159	8	110	-372	355	197	1720	1437	1064	1213	132
115	795	192	1142	55	-42	502	416	749	1564	422	690	431	418	671	-628	351	301	49	1112	960	410	437	712	502	201	-407	271	303	290	129	994	328	465	707	630	206	284	398	89	333	622	602	401	286	584	943	403	534	246
116	-485	-424	-179	-444	96	-369	-296	-352	-205	-237	-216	-242	-216	-125	787	-309	-343	-288	-748	88	-134	119	510	-238	-53	-729	-248	-487	-1175	-577	-631	-690	-155	127	-11	-244	-580	-88	-845	-361	-373	-31	-104	-43	-75	-231	-125	29	-80
117	441	1785	480	901	521	1599	1274	1214	289	500	156	85	394	498	14565	3268	639	10014	8996	2517	1194	968	696	1571	1288	1303	189	653	3965	1237	554	1092	1372	746	1069	431	816	399	2876	1171	2011	2165	2917	922	2268	3686	1255	639	3176
118	-375	-501	-371	-699	-627	-237	-654	-491	-359	-283	-241	-290	-380	-382	-469	-588	-575	405	-870	-69	-109	-276	-193	-92	-183	-1437	-376	-528	-995	-519	-750	-772	-254	-10	-82	-336	-627	-596	-717	-746	-352	-381	-568	-473	-83	39	37	-266	-190
119	730	2110	641	468	573	1959	444	674	1	1199	231	264	282	510	5942	2105	249	6435	5145	2830	1842	1000	1407	1532	1520	161	154	1233	3503	1499	424	590	1350	972	1232	573	496	85	1443	827	1159	994	2113	562	2376	3932	1122	422	1996
120	206	559	223	185	-440	122	177	249	72	30	134	14	162	145	-536	-316	-578	249	1342	246	136	13	349	185	286	-103	-35	239	395	319	97	497	197	70	221	101	361	-168	585	390	324	399	208	-81	230	-181	-27	-19	80
121	293	1628	638	744	129	1625	562	977	68	1095	240	85	164	407	8920	2720	196	7103	5401	3672	2074	1083	926	2562	1760	-170	158	775	4583	1402	379	826	722	1176	1645	457	734	-178	1694	655	1669	1422	2229	678	3289	5490	1398	503	3078
122	54	-228	-27	-51	-376	79	46	-285	-92	-130	-60	21	85	67	-208	115	-174	-521	-206	-14	-229	-197	132	20	-81	285	16	-236	-174	-41	77	-329	-175	2	-33	-326	-121	69	238	294	-63	2	54	4	127	107	63	-167	-21
123	3906	11589	4830	4864	3349	9385	7071	7405	2418	2628	681	1279	1651	5065	64137	10983	4223	57253	57398	8016	4831	2358	3005	5397	3418	-723	1469	4651	25607	10298	3311	8610	3257	2696	3602	1309	5621	1902	19772	8914	11794	10942	12853	5574	7188	12373	4025	1782	7453
124	-54	-19	-67	30	-344	35	-40	-19	-234	-20	-78	-86	113	-100	344	46	-144	-727	-12	24	-145	-197	47	-133	-129	-123	-96	-60	-287	-176	166	86	4	-48	22	-205	-29	-265	-241	-21	-26	-114	11	48	-169	-84	-32	19	322
125	4696	10798	4783	6108	3671	9794	6484	7531	2052	2350	906	1640	2755	5008	69888	13369	3752	59254	51285	7284	3806	2958	3356	5300	3483	628	1660	5152	26106	9290	3436	8423	3154	2645	3318	1683	5598	2160	19821	8803	10669	10796	14461	5699	6661	11460	3768	1843	6439
126	-382	-635	-224	-256	-520	-390	-302	-477	-391	-390	-79	-335	-65	19	-2287	-614	-315	-1954	-3481	-150	-305	-251	144	-67	-273	-2189	-250	-289	-1628	-415	-258	-590	-67	-87	-91	-349	-428	-523	-609	-25	-420	-197	-441	-326	-241	-487	-257	-214	-90
127	17048	40126	15183	20410	21264	33865	17102	27264	7372	9953	3990	10422	8515	16976	241375	57390	16512	154710	116707	29154	14713	11657	23343	21478	16369	764	6699	16675	82665	31626	13340	29514	20750	12665	16050	7161	23721	13118	76631	35748	38489	50552	57035	26642	30007	50011	23851	7975	20917
128	95	421	377	467	349	237	334	254	231	69	194	205	282	518	4743	805	486	5337	2846	355	104	209	78	-13	230	105	399	246	1505	403	443	521	145	61	52	301	255	416	1073	336	271	886	1060	288	612	311	159	119	349
129	3697	13919	4620	4053	2344	13221	5354	7535	2623	1824	539	1797	2100	3886	42694	11818	2713	53765	47283	8142	4647	2212	2026	5323	3749	254	1026	4617	32790	10805	2278	5810	2881	2787	3088	1112	4412	1374	15306	7002	10679	9380	14170	4445	6700	9325	3490	1251	5309
130	12	727	347	406	415	480	521	673	-4	349	157	199	182	337	2701	591	394	2303	1903	648	474	142	288	345	462	389	326	-64	1369	458	399	561	15	213	170	407	348	256	685	525	739	412	702	510	904	517	254	88	688
131	41611	69088	32393	42474	31622	64069	42768	60544	23780	19766	10144	1057	1224	31679	446676	102795	41388	461387	332798	36427	18104	16777	37254	35203	33614	7528	16805	48011	153212	53200	28531	47584	25072	24770	24730	13748	41482	30495	145986	66664	67762	110300	120224	57927	55968	93094	45759	14968	38514
132	-103	287	-26	-138	-100	-16	87	-17	-43	31	17	211	88	356	2181	491	540	487	1156	379	448	183	487	243	328	-1089	-84	136	41	-8	-139	-29	69	76	224	125	-103	630	876	-113	176	327	684	192	294	601	78	104	243
133	36534	69727	30591	36609	25190	65904	41060	48003	20980	16370	9100	172	301	29599	426156	105474	28986	365322	290087	41672	22252	17161	33179	35878	33290	3833	13098	43770	159781	56486	27592	55931	21626	24679	23690	13589	39584	20432	141716	62365	64321	100722	114054	52320	48302	90885	43643	12113	35149
134	268	787	230	121	264	141	53	279	-47	269	270	600	527	359	2248	578	-121	443	492	503	378	280	78	355	278	-101	163	306	1213	373	130	124	161	197	195	367	-90	4	1115	217	400	602	1123	199	396	788	409	232	60
135	2	-190	-93	-36	-21	-34	-44	11	-65	-28	-37	-50	-39	-18	-133	-226	70	-557	1	-76	-96	-40	-71	-58	-22	-12	15	-19	-277	-69	13	-8	36	-151	-29	-11	-94	-9	-193	-165	-16	-100	-113	-46	-92	-42	-121	-69	-25
136	-172	-117	-158	-445	-376	-76	-302	-212	-21	-217	-187	-89	-112	-243	156	-395	-404	-368	76	-201	-309	-152	-118	-197	-94	-265	-282	-128	-29	-132	-203	-215	-362	-211	-323	-415	-306	-244	-240	-329	-338	-457	-606	-495	-69	13	-116	-293	-228
137	45	-62	69	-172	308	44	-80	-32	58	1	-87	68	-50	-139	942	40	84	1615	544	-131	-88	-98	-46	-54	-243	51	-29	-102	-2	15	-35	-134	-72	-195	-112	-132	-269	-57	-284	-220	-215	-402	-164	-199	-57	12	-67	-100	-129
138	21884	35672	19116	42868	36418	20931	36577	41140	20134	16616	11413	19131	28478	29624	19549	44549	38244	35754	33627	30378	17388	13115	52046	30238	29190	8750	23385	30586	44904	37100	21756	48570	63951	23716	22851	10856	32144	33829	30839	37170	45338	46970	78706	51502	41112	46273	47717	34746	30161
139	878	7258	1105	1817	1746	3172	916	2153	682	388	255	498	1014	1081	3021	1425	1581	9737	4397	2654	576	801	856	1281	1925	251	712	7476	15265	4919	1404	2201	749	673	2125	523	1911	662	3011	1397	1682	3211	10724	1026	1892	3090	2016	311	532
140	19738	8252	9939	5609	9623	11053	22594	13439	18450	9499	10795	10708	3221	30293	12219	13880	11195	44485	18482	4675	8878	8152	7707	6463	8626	12713	25926	6702	2845	4917	18932	15763	15861	18244	18041	4285	7184	28319	8925	24805	18090	30341	14855	23516	27114	17541	22773	12020	16475
141	-244	-71	-195	-227	-52	-280	-189	-156	-131	-93	18	-135	-108	-174	438	-148	-16	1768	79	-66	-115	-32	10	-69	-100	-815	-182	93	-552	-23	-163	-114	149	24	233	-91	-146	-518	-21	-139	-199	-74	84	-137	-56	-45	22	-131	5
142	27197	14115	16136	19207	22312	16222	39498	33283	23000	14466	13441	16784	6936	37860	20897	30026	27214	43862	20074	20044	13375	11566	14021	14552	16917	15235	32567	12926	4411	9750	24455	37745	36439	26253	24156	8368	21575	39416	16663	37364	33699	40673	33642	41294	33919	23541	32199	31442	34287
143	324	558	277	390	173	295	142	-104	297	432	221	377	328	109	2226	370	359	106	853	438	-109	409	704	387	171	431	68	481	771	520	491	88	482	225	627	446	72	-41	163	265	252	91	410	-59	440	647	291	226	45
144	40176	23782	23179	22072	26343	24203	22015	17661	19875	15061	12209	14194	27001	28735	14265	15435	49494	19991	21474	18108	15838	12994	18184	19630	27989	13537	30387	23102	63422	31947	22669	28517	17200	20668	20024	11297	31218	38024	36859	40183	28282	44810	27847	51913	48771	23587	48219	32591	16806
145	264	936	418	150	714	734	112	-22	38	382	188	112	156	55	-694	-13	311	1307	880	286	146	215	890	15	580	-156	114	617	2746	1077	217	40	104	129	731	381	71	-93	255	36	143	101	1330	246	571	234	438	194	144
146	35517	5412	13823	4417	11245	9591	7537	10119	26971	5746	11926	8331	4339	19100	10814	9585	16677	10302	9039	10220	8333	6029	7456	5204	17074	9178	30208	7017	5478	4450	15129	12030	5886	10245	12803	7683	5613	19405	6587	27311	10604	26986	11238	50617	39854	11800	24776	17187	7777
147	-16	101	-60	-331	79	-81	-16	-90	-85	94	64	-38	-73	59	266	-191	-134	132	651	114	-12	-96	354	57	-30	-473	-23	119	23	-62	-109	213	23	107	142	94	-2	54	-218	-133	56	-173	217	140	144	65	76	-147	-130
148	33718	10562	16686	5532	10939	11998	13489	12128	18944	7107	8943	9079	9696	22123	9992	13222	19951	7809	14550	14054	9559	6398	11875	10786	19953	5829	22839	11563	12398	10093	16425	17896	8759	15795	14248	7937	10364	24509	8999	34217	17377	34937	19868	57264	40490	14251	43282	24587	11145
149	-60	237	73	-10	249	310	49	-46	58	202	217	204	195	107	-317	214	133	406	344	252	21	183	563	197	288	-126	157	324	373	103	71	40	238	219	300	352	119	254	-48	288	-17	103	181	377	375	291	285	167	56
150	1144	1091	763	1980	2344	1484	2866	1589	2975	1362	2455	1589	1508	730	919	734	455	1373	806	981	1929	2228	3678	1004	3838	2004	2118	3964	1543	1143	708	1471	306	2134	2171	1388	5874	2441	1013	1419	2462	1050	2439	3468	1209	2418	3216	2614	2652
151	-1821	-2260	-1312	-2177	-1693	-2324	-1219	-2439	-717	-1083	-212	-938	-1016	-1117	-2795	-2113	-990	-3089	-3309	-1480	-958	-637	-44	-781	-1148	-677	-807	-1564	-3974	-3092	-1576	-2018	-1255	-539	-601	-755	-1740	-1124	-4259	-1984	-1800	-2167	-1537	-1426	-449	-1383	-505	-604	-1901
152	-2072	-3103	-1489	-2188	-1518	-3072	-982	-2024	-117	-412	64	-624	-965	-1132	-3873	-2189	-696	-6166	-3967	-1168	-900	-335	471	-470	-394	-27	-158	-1861	-5601	-3800	-1570	-1337	-1035	-322	-93	-655	-533	-339	-4608	-1797	-1306	-2583	-1634	-1114	-204	-1153	-246	-81	-853
153	273	105	217	-78	234	202	665	228	783	33	270	232	26	205	1130	45	0	393	-443	139	104	212	199	-14	384	346	529	458	-2	84	105	163	95	307	379	71	460	344	106	153	388	36	175	512	300	344	138	264	371
154	-313	1073	359	-142	128	941	-90	-485	708	-282	-350	-296	-211	-247	-372	-341	228	6222	3473	-284	-216	-315	-233	-629	-259	-1011	-13	-43	3122	-81	-432	-197	-307	-183	-174	-457	-307	-329	-611	-342	-112	-33	260	-81	-270	-402	-322	-190	-128
155	-305	-9	2	-135	-122	254	-61	75	570	-86	-77	-113	-66	-75	-602	-55	430	3154	1074	-100	-3	-228	-84	-195	-117	409	-89	-148	600	-132	-236	-108	-170	-98	-32	-109	24	-225	-203	-218	-54	36	0	-171	-86	-67	-127	-131	-2
156	-566	52	18	-201	-384	426	-232	14	172	-169	-239	-289	-293	-406	-1037	-219	-131	3743	1301	-78	-60	-303	-349	-384	-370	-144	-216	-266	1828	-219	-220	-183	-380	-173	-189	-381	-367	-185	-548	-303	28	91	56	-16	-95	-301	-227	-240	-271
157	182	150	145	81	-183	183	78	143	297	158	123	77	66	251	1182	195	245	109	122	119	87	33	45	-96	215	-75	153	104	342	179	-66	185	248	131	215	66	8	0	307	176	-10	203	232	194	197	275	66	189	51
158	103	121	52	181	381	196	140	167	217	206	132	103	139	142	1016	311	243	-1075	65	120	95	150	357	148	100	578	168	211	122	156	183	149	209	130	163	248	58	209	66	191	160	187	91	159	211	283	151	221	60
159	-90	-200	-33	-90	-48	-46	-25	-19	-31	4	-56	-68	49	-20	-620	142	-51	-1473	-883	48	-58	-23	-70	-8	98	-258	-35	-77	-67	-134	-87	-25	22	45	37	-102	-44	-68	-289	-94	5	-12	17	82	-23	-54	-7	15	-33
160	19	57	3	-19	66	-256	-97	35	-8	31	25	37	121	39	-1366	68	-81	255	665	-7	-4	61	28	167	27	582	50	-28	-52	-154	90	-17	185	79	28	59	34	-68	148	-2	82	-63	-29	41	-2	44	137	102	45
161	27	-5	-40	-58	-130	1	-46	77	-18	0	2	45	49	18	-332	0	-31	471	203	-1	12	46	51	13	61	143	-9	-19	45	23	64	-21	-37	-11	40	-24	-3	46	-62	1	32	-69	-53	3	60	12	-16	19	20
162	-39	5	-45	-133	208	-38	-69	-73	-34	-140	-103	-67	-54	-89	-936	-81	-35	-235	-81	-69	-87	64	-47	-146	177	-205	-84	-42	-142	-120	-96	-125	-69	-15	-56	-103	-146	-28	23	-104	-134	172	-146	-21	-7	-52	-48	-68	-47
163	379	573	307	425	908	523	241	128	537	706	634	349	-41	292	1382	527	400	-308	-708	278	530	476	-44	188	884	5208	87	406	849	587	540	227	-67	484	462	800	593	903	339	597	395	357	149	192	781	770	406	532	565
164	-17	1346	564	-42	428	2307	-4	149	421	-7	10	72	7	25	48	-6	254	3703	1534	9	115	-42	59	-70	-6	7	27	160	4966	795	5	-65	-80	-49	-72	25	72	-50	90	62	159	53	210	107	14	-64	-80	-52	-43
165	40	5331	2450	650	3438	4945	568	964	1493	645	492	105	141	569	886	755	2535	4801	2224	457	752	457	187	85	1461	5509	718	2678	17037	5848	325	529	70	181	405	372	968	790	533	637	702	1327	1198	815	606	569	509	286	-104
166	-78	98	-17	-213	-89	10	-2	-123	-14	74	70	-94	-107	18	-531	-304	48	-440	-249	-70	-81	30	11	19	-127	-480	-99	-52	3	65	148	-73	78	15	0	-23	46	-131	-220	-102	4	34	-52	-153	-59	84	-4	-93	-38
167	-158	-107	-21	-26	-237	-116	-65	-132	-69	-99	-91	-59	-36	-68	-1710	-51	-88	433	153	-131	-115	-117	27	-56	-66	-451	-81	-153	-297	-115	-77	9	-34	-39	-46	-22	-136	40	-162	-26	-54	0	-102	0	-12	-118	-88	-34	-41
168	-136	-249	-134	-85	164	-210	-51	-58	-123	-64	-70	-34	-153	-86	-129	-138	-167	37	-267	-41	-27	-99	-214	-56	-119	-149	-160	-112	-342	-106	-166	-231	1	-26	-38	-61	-22	-161	-360	-98	-71	-5	-32	-116	-71	-109	-56	-148	-17
169	-317	-286	-255	-320	-3	-246	-224	-191	-342	-295	-232	-202	-141	-258	474	-209	-331	84	-513	-134	-126	-121	-254	-85	-96	-550	-239	-145	-531	-286	-272	-235	-151	-124	-163	-254	-129	-182	-349	-179	-169	-159	-107	-205	-160	-326	-131	-145	-225
170	-40	-5	13	-58	-87	-49	-21	44	2	24	2	-107	-79	25	-829	-97	-127	1500	-417	-13	-7	-40	-2	65	61	-554	32	-129	-285	-132	27	141	71	-28	-25	12	-49	-47	-96	-104	-72	-58	-5	189	-5	-18	62	34	-54
171	-82	-116	-100	-40	-367	-109	-97	-36	-37	-66	0	-92	-63	-49	243	103	160	519	-344	-55	-49	-69	-75	-31	14	-351	-27	-65	-169	-94	-31	7	-66	-32	11	6	-57	19	59	-94	35	-27	-52	-10	3	-71	-64	-121	-5
172	-1912	-2256	-1282	-1987	-1565	-2610	-1484	-2041	-749	-4190	-258	-1063	-1015	-1142	-3818	-2418	-1226	-4272	-2012	-1363	-1001	-647	-280	-897	-1212	-318	-898	-1718	-3696	-3203	-1392	-1625	-1362	-542	-529	-826	-1484	-1449	-3747	-1873	-1767	-1716	-1396	-1398	-869	-1327	-586	-671	-1221
173	-175	-84	-33	-96	-393	-28	-42	-27	23	-35	23	-38	-125	-32	-572	69	-68	-1427	-580	-31	4	47	-44	65	19	-213	14	-69	-290	-91	12	32	-77	-9	-30	14	-73	-119	-319	-54	-48	-133	-138	-203	-36	-21	30	53	-8
174	-2542	-3296	-1926	-3362	-3179	-2980	-2592	-3569	-1260	-1660	-454	-1395	-1596	-1893	-7130	-3429	-2064	-11676	-8363	-2151	-1471	-865	-721	-1071	-1503	-1090	-1783	-2508	-6769	-4170	-2346	-3247	-1731	-900	-922	-1036	-2329	-2278	-6217	-2865	-3014	-3137	-2310	-2681	-1158	-2572	-872	-1211	-2512
175	1185	1015	1470	2098	2493	802	1663	1971	1186	1238	919	1512	1572	1426	5223	2606	2895	9286	2645	1277	853	894	1366	1978	1216	5526	1779	519	1021	1306	1822	1873	1774	1070	1309	1455	1292	1744	1727	1291	884	1350	1084	1992	1199	1386	1511	2011	810
176	886	818	626	688	612	413	1062	745	826	842	696	1829	251	626	-168	478	724	3255	1267	350	825	1694	1576	973	942	1038	474	834	1379	856	71	774	506	687	533	648	330	1141	1037	781	361	1230	316	243	688	979	571	516	134
177	-139	-206	-123	-301	-57	-15	-46	126	-105	247	-32	-161	-23	-1	-537	697	36	-239	-357	-91	-128	-95	760	336	6	-187	-4	-97	-985	-173	-142	-236	-133	155	28	-221	-269	34	-330	-227	-130	-122	-202	96	-195	-95	28	-85	40
178	2476	1814	1657	1431	974	462	1514	2144	1893	2930	1772	2789	1098	2588	1229	1388	3164	1024	829	1791	2304	2585	3269	2961	2325	1076	1066	1076	693	2278	1240	1737	1577	2152	2137	1166	1136	2245	2039	1281	1521	1886	765	1341	2310	1926	1576	1632	2059
179	-109	-719	-324	-402	-293	-57	-237	-408	-298	-158	-128	-7	-72	-112	639	-179	-520	215	-633	-74	-5	-80	123	-265	-63	-137	-21	-354	-934	-196	-86	-315	-98	112	15	-80	-204	-633	-120	-269	-363	-87	-35	-129	-76	-197	-168	-107	-122
180	-597	-505	-392	-670	-750	-312	-364	-550	-347	-350	-351	-381	-639	-381	-865	-508	-932	-3764	-4963	-208	-235	-584	-202	-477	-410	-8177	-440	-383	-778	-642	-684	-406	-389	-154	-255	-478	-386	-582	-629	-326	-410	-397	-299	-475	-509	-553	-324	-413	-273
181	-129	-239	-230	-189	-214	-144	-64	-47	-96	-349	-80	45	-33	-139	458	-35	-76	-1263	151	-62	-963	-78	17	100	-253	-153	-136	-82	-198	-431	-213	-36	-37	-24	-110	-155	-64	14	-48	-90	-154	31	80	-203	-38	-103	-83	-36	-51
182	5807	5640	7807	9272	9916	4328	10809	10462	6864	10492	6812	7183	3999	7967	6477	6964	10096	10960	10832	4149	6670	5863	5953	7594	12029	4599	7822	11698	5668	5770	10069	16398	9699	10343	5662	3540	5614	12168	10175	3353	6491	14500	11463	6832	12703	6196	13325	7150	4084
183	-146	-93	-51	-112	92	-116	-63	-95	-42	-87	-79	-13	-61	9	123	-60	-195	-372	-436	20	23	-57	-49	-205	-107	-41	-2	-108	-178	72	-200	-210	32	-32	-32	-48	-154	63	69	-24	27	34	-71	-15	-81	-91	-139	18	-134
184	-6	-23	-4	-39	158	-20	51	-4	0	17	4	61	58	25	-248	88	139	1076	-51	-75	29	0	-77	5	-4	122	-46	8	206	28	-1	0	-47	-23	20	117	-64	7	-109	-36	-32	7	36	-34	2	14	12	-14	6
185	167	223	110	99	68	176	200	107	4	-17	101	79	11	93	122	27	60	-728	74	99	-33	16	69	59	-14	2184	155	29	403	290	205	248	-14	18	61	279	125	54	164	213	102	15	50	-44	-51	-4	87	86	-203
186	466	195	380	147	-37	257	97	83	414	-119	220	216	-51	144	850	121	-148	-1051	-210	157	168	199	42	27	-26	332	306	136	907	687	-47	220	149	278	171	297	172	657	307	234	85	258	201	301	375	328	584	274	75
187	705	198	239	29	46	695	104	430	427	111	473	1333	243	426	-143	25	92	483	840	983	242	990	1034	776	115	500	633	314	787	43	394	243	961	3883	1837	1320	331	921	448	170	659	1076	713	233	967	1049	1138	383	466
188	257	527	3021	382	797	252	2080	797	326	602	793	336	200	560	718	738	335	1119	1327	260	566	331	392	521	496	386	783	327	910	434	207	758	516	434	342	614	282	467	1586	1582	397	845	602	374	414	169	425	198	370
189	105	45	-83	241	391	239	505	392	15	189	58	-9	77	119	21	429	325	4264	1283	-13	7	90	3903	216	89	565	136	4469	72	-21	332	134	5560	6217	10782	30	8	273	413	-20	2946	427	4697	164	93	52	352	47	9994
190	194	477	623	221	76	177	166	125	717	112	269	307	359	223	726	30	45	751	94	583	988	297	418	126	111	125	13	349	552	205	474	198	528	281	610	1686	130	523	358	368	705	720	178	723	439	434	1002	35	490
191	372	414	306	37	201	274	421	230	424	472	373	308	257	145	643	115	306	1148	943	443	394	396	662	121	92	1478	346	375	908	393	251	325	282	281	246	212	130	439	957	242	165	435	273	179	222	186	220	161	104
192	892	691	613	900	1593	1055	882	401	720	971	1118	763	1672	1243	4480	1713	2001	1862	-119	1059	1220	1174	1153	877	1562	-948	1910	1416	2759	2137	1553	548	761	322	973	1350	2578	2023	2654	2273	1189	1017	1199	1754	1150	1576	1854	1173	1336
193	1003	556	1078	131	328	836	712	721	1362	769	1110	1034	556	744	196	183	706	680	778	1461	1170	858	277	281	565	-21	932	566	203	359	761	106	719	533	1053	298	403	887	593	842	504	736	454	652	2048	437	715	452	431
194	3352	1762	4017	450	1517	1255	3095	1169	3623	1502	3018	2951	1544	2259	972	1248	1266	1163	-135	3559	1353	1564	2129	1158	2370	265	1429	1609	-21	3573	1245	889	2617	1215	3238	2535	1806	4138	2262	4163	902	2353	836	656	1767	3492	4208	1394	1413
195	2306	1431	2159	469	576	1403	979	902	2659	781	2136	1127	979	1053	313	635	471	-44	439	1741	592	854	922	268	1167	432	1025	1154	1177	1287	858	774	924	1059	1468	798	543	1292	1050	673	574	1093	364	585	1249	1152	2172	460	548
196	3096	3519	2316	1584	1133	1600	1869	1760	2039	1764	3834	2055	1373	1521	185	782	967	870	1691	1401	2681	3326	1786	998	2575	436	1344	3845	5186	1783	1091	2995	2410	2273	2146	4777	5029	2560	3759	2433	1583	1916	967	1107	4896	2464	5856	1052	1737
197	193	121	215	208	509	202	233	90	260	356	261	191	409	67	-288	171	183	840	-536	625	25	310	231	238	250	894	155	184	93	128	178	217	241	199	303	295	294	110	133	234	266	201	201	311	480	130	355	377	240
198	113	38	350	737	60	313	428	57	199	513	712	313	-56	29	-58	65	93	431	501	446	634	616	720	363	613	57	27	223	60	781	160	640	36	560	640	726	289	23	-14	418	307	239	347	446	1722	330	584	317	308
199	191	32	74	36	194	181	-79	104	212	176	-78	-69	-52	163	-478	-353	-3	-1455	-673	-4	-9	132	-81	-189	-158	81	334	18	-169	290	-72	94	11	6	-35	-96	28	10	-160	-224	61	138	61	186	105	-160	-184	76	192
200	-1535	-1417	-1578	-1581	-1817	-2772	-2039	-2775	-1367	-959	-1227	-1129	-977	-1859	-5859	-2155	-2025	-6241	-7165	-757	-883	-1297	-1416	-2064	-1511	-313	-2668	-1367	-4671	-1273	-2180	-1575	-1316	-1483	-960	-1563	-1647	-1527	-2270	-2937	-1532	-1651	-1628	-1669	-1385	-2539	-1401	-1189	-1274
201	559	1762	1641	598	670	968	609	443	1580	866	832	659	1661	4101	-497	756	2123	166	1092	1012	1419	622	1191	664	457	3100	990	326	138	572	710	756	1512	966	748	1376	883	1636	2219	1286	624	180	740	495	309	394	686	1505	745
202	199	576	1957	232	111	352	515	453	388	425	664	523	238	1732	-62	424	44	221	569	627	550	477	322	410	604	322	158	373	157	231	460	660	394	418	684	619	69	218	768	564	531	903	205	133	488	546	167	219	276
203	707	3075	651	952	510	623	1802	1418	765	1088	3496	804	608	1110	877	885	746	1122	1499	569	625	700	2068	1059	2980	744	878	2276	852	2807	1330	1521	2871	2888	2786	1670	1252	2150	3477	423	1870	4435	2245	938	2039	3091	3036	1170	978
204	933	624	1144	1011	499	607	743	1033	657	867	975	1584	3092	1015	2477	1030	1145	1459	584	1430	1303	1234	1726	482	402	468	1192	697	763	1578	1235	680	1446	1155	799	2782	667	1130	2143	352	631	812	476	360	2768	730	1168	622	807
205	294	553	249	688	574	266	426	552	343	162	138	249	312	254	2195	228	517	956	819	91	184	378	249	277	361	446	330	326	1053	674	456	470	337	69	324	1034	413	418	616	196	-92	320	255	90	279	710	331	407	186
206	950	602	724	93	24	280	100	267	455	205	356	263	159	198	-252	-22	359	502	-257	391	280	474	75	22	426	279	460	352	401	520	168	221	256	304	266	398	285	314	351	374	356	580	-15	361	549	371	440	204	25
207	-123	-27	-130	-191	148	-21	102	-9	-80	-30	-4	-91	-76	-84	186	-59	70	585	-643	13	24	-46	-46	-162	-135	-68	-44	-87	20	-216	33	-34	5	4	-8	-126	-81	-53	-260	-51	-69	-153	-43	36	-58	-29	11	18	193
208	21	423	354	132	125	1414	326	-10	911	195	190	17	597	97	-688	263	270	52	-98	528	876	-62	365	106	466	591	56	780	393	1709	2	93	352	328	121	787	452	470	557	82	-83	480	347	170	200	487	167	17	284
209	-66	-47	-20	17	56	46	-19	-18	-10	-55	-39	-17	-18	-72	170	68	-8	-676	-262	-92	10	-13	7	-33	-45	-34	-70	-33	9	-26	0	-21	-46	-42	-30	-36	37	3	-104	-39	-43	-42	-60	22	-82	-51	33	-49	-147
210	2	147	-98	-52	-66	14	105	50	-37	-41	38	-25	59	13	-112	-47	49	-451	-354	-27	178	-2	-84	-2	0	-162	145	-65	-192	67	-25	-283	-51	128	13	76	169	4	-132	93	11	114	-22	47	-47	3	-159	88	-30
211	-313	-343	-340	-219	-360	-279	-190	-88	-3	-186	16	-179	-204	-232	-1597	-226	-400	-593	-1058	-278	-124	-82	-322	-175	810	-287	-182	528	29	-282	-318	-287	-281	9	-59	-124	316	-173	-307	-207	-144	-118	79	28	-247	-414	388	-112	-97
212	282	341	306	408	547	140	89	266	402	288	332	240	246	158	762	268	529	2113	569	57	335	320	139	161	39	1545	577	295	756	393	595	110	278	83	77	520	368	835	629	383	378	91	198	313	145	407	260	324	91
213	427	4	59	594	327	31	322	177	517	400	337	531	489	465	2117	1620	363	3880	1460	334	472	643	874	599	546	5043	1075	958	871	616	228	781	197	350	819	416	2421	882	363	210	945	276	786	311	363	1112	872	961	1674
214	770	853	823	701	437	883	1060	794	1283	1237	1530	1235	2593	1135	163	639	294	699	276	1632	807	1108	1749	2265	1537	-1271	638	1067	680	402	848	1024	1640	1708	2909	1414	1231	932	599	820	1708	736	654	940	1580	1109	2655	1328	1881
215	150	-6	38	49	56	-67	89	7	41	-74	-19	13	59	-46	341	-85	119	987	990	-26	-27	69	189	17	-96	986	-59	-4	30	-9	90	32	49	60	22	2	33	-30	108	113	26	126	103	-107	-74	12	-39	-13	-11
216	125	285	141	353	274	111	252	439	191	284	265	74	148	127	996	137	266	977	761	109	177	200	-335	387	625	127	31	140	262	262	181	247	472	244	103	136	87	-10	275	86	66	416	36	1	118	108	36	173	231
217	85	-1	30	204	130	-264	57	12	80	198	59	106	208	94	1302	183	45	-361	-10898	142	21	100	135	243	48	236	269	308	431	301	140	140	208	179	63	172	350	303	-13	-16	153	131	248	43	85	286	130	82	296
218	466	266	1965	2187	823	2853	1579	3275	3273	1645	1369	1615	4106	1893	864	1198	1101	926	-182	1052	1214	1510	952	2319	2404	1965	187	4554	-641	-243	-161	1083	400	2451	820	266	302	-15	-387	299	567	2467	4218	964	990	11	806	465	1672
219	209	1898	1328	791	611	433	355	523	925	2079	2046	228	769	1088	604	456	1280	-539	662	2281	767	722	1079	1357	1899	261	-31	204	277	1513	-41	701	11	866	322	412	40	11	119	66	-43	195	72	190	673	1152	169	990	267
220	110	-207	-22	-1	17	-15	124	196	62	31	210	206	190	-48	-84	165	75	327	701	41	-24	33	-65	26	68	-614	86	-76	-289	-30	-90	128	168	23	0	-152	-16	-221	106	-87	131	179	-109	93	151	-83	-140	-28	238
221	95	178	15	101	82	91	172	70	7	34	44	-25	129	99	1140	199	29	1999	1325	144	68	35	215	151	208	284	10	49	457	265	116	137	70	34	84	97	72	35	435	195	160	162	194	95	157	243	176	123	169
222	34	160	72	94	115	169	80	120	65	38	85	-35	-52	43	604	120	61	103	580	240	117	49	-49	178	111	-221	3	183	574	3	-129	43	-28	177	94	51	-93	-49	168	210	147	71	312	69	471	413	212	34	78
223	794	689	375	291	-246	302	15	-123	273	385	724	365	131	373	2054	56	1183	-771	-1374	475	468	701	599	23	413	-764	275	-165	1496	263	890	-226	1682	2097	512	1158	1900	509	815	975	181	1582	601	1296	29	271	879	905	993
224	-47	-60	-30	-331	-668	-90	20	-185	-152	-399	-257	-58	-70	-105	-317	-183	-70	377	-659	-191	-203	-195	117	-203	-368	-846	-167	-79	74	-131	-207	42	-268	-53	115	-236	-173	-289	-303	-324	-79	-152	-188	-35	-241	-269	-198	-120	-82
225	303	346	291	227	192	320	229	287	271	177	207	331	199	105	3	168	190	827	516	195	204	154	337	566	309	140	156	444	375	148	118	248	82	235	48	203	324	250	420	100	321	41	217	194	204	257	305	66	113
226	3169	3032	3563	3413	4477	2590	2869	4105	3720	2571	2834	2010	3614	3425	4954	3569	4652	15425	18573	2472	3651	2952	4504	2405	2357	2529	4253	3106	3970	3550	3558	3426	3133	2037	2234	3781	3740	4714	4991	4461	3166	3687	3344	3529	3627	5127	5441	3500	2463
227	1935	1800	1880	1326	1606	1523	1958	1593	1713	1634	2021	2333	2369	1281	2450	1413	2230	995	168	1851	1470	2621	2081	2241	2240	543	1387	2101	2344	1784	1305	1327	1731	2041	2400	3641	3004	1200	814	1734	1069	1196	3044	3109	1508	1419	3538	1363	2019
228	21	-79	-12	44	-66	24	-12	-50	8	-30	22	23	-59	0	-451	52	88	-475	-313	24	-96	22	191	52	16	5	-52	-19	18	-65	-12	11	-33	-19	22	14	23	-88	-87	64	-32	-104	-79	56	-78	65	84	19	-17
229	18	48	13	50	-6	54	56	-18	66	17	0	10	-55	-30	134	-19	-46	315	-80	-35	15	-20	16	-20	13	-164	-66	51	-151	28	-17	62	-83	10	20	22	-12	-10	30	-47	-56	30	13	26	-25	-111	21	83	13
230	-129	-657	-128	-442	372	-324	-351	-617	-70	-424	-252	-445	-460	-110	-169	-558	-329	380	707	82	-95	-41	-506	-145	-211	776	-567	-414	-398	-168	-173	-106	-334	18	-234	-462	-28	91	-435	-90	-116	20	-112	140	-63	22	-166	-197	122
231	1213	2610	1612	517	1147	1836	1121	1818	1754	1188	2112	2701	1695	2076	975	627	976	1974	-122	3381	3199	2753	1244	1250	1212	28	1636	1244	1600	1449	874	3201	2728	2884	3384	1917	670	921	943	2914	2080	1263	1913	767	1494	1299	1234	1854	1276
232	1454	1453	1813	887	708	796	1051	1950	1593	1048	1947	1913	1408	2429	592	1139	1667	2775	1901	2977	1064	1742	2130	1493	1584	1878	1226	717	583	859	2647	1537	1706	1712	1547	930	895	1361	1888	922	1044	1523	1177	1182	1723	1566	1286	1845	1110
233	13311	21297	18693	16698	11687	13885	5989	8711	11026	20756	11687	5020	8013	9981	2569	7305	19055	11415	19572	8502	20494	5531	6528	6871	18274	9388	11534	15219	23273	39044	17592	12616	8631	5028	13177	16415	11442	7228	6582	10462	10551	4782	10838	16843	6569	11079	12731	8429	8437
234	177	404	408	120	159	165	443	372	263	427	550	503	148	384	-140	35	325	-293	372	454	607	458	349	106	261	455	302	182	278	143	460	264	214	311	218	350	61	466	304	239	227	204	308	143	359	622	336	335	299
235	198	143	76	141	271	76	88	93	206	66	96	102	145	-5	590	104	67	-767	516	70	21	331	337	125	148	-44	83	116	401	181	342	-3	73	90	183	85	167	381	232	34	-14	3	71	25	58	99	181	305	164
236	7	-54	-36	-20	-75	-33	-48	-102	-14	16	26	56	-16	-81	107	-159	30	1213	-168	-135	-183	-16	-42	112	-99	6	-65	-8	12	-87	-150	-46	48	-68	-49	-94	196	42	-265	-95	-23	76	35	-36	-69	24	-49	30	38
237	625	969	1602	671	367	1012	720	1053	1246	865	1522	889	468	1499	-796	304	769	881	1057	1611	2033	875	925	699	1181	-769	1119	1302	828	1257	1569	1131	1651	1355	1663	1498	830	1436	1705	1882	966	1078	1177	345	814	1628	2842	932	1172
238	127	289	181	333	-69	86	127	141	136	225	244	110	50	96	-244	289	-72	610	-293	106	245	203	392	106	325	42	141	309	380	229	146	211	327	240	121	352	381	523	178	100	93	178	175	167	219	666	243	21	133
239	648	3726	2237	880	2053	1431	720	1582	1246	2035	3007	1185	1977	1222	-589	635	513	2314	1119	4154	2126	1653	1599	978	1249	1116	782	748	810	1157	565	631	813	1272	1191	4807	654	1743	679	382	775	1370	894	536	1606	1478	1586	1212	631
240	135	213	232	76	321	362	194	345	124	295	80	296	151	260	1712	282	334	158	250	112	910	369	441	83	212	-59	143	280	708	177	86	211	59	231	126	9	193	91	125	39	217	282	279	254	20	230	119	57	212
241	136	183	131	17	148	140	80	175	170	40	263	120	142	65	-502	154	35	1101	471	194	43	222	347	176	160	153	159	7	67	39	325	70	158	558	217	267	215	424	320	96	265	338	269	145	169	269	239	185	128
242	393	177	413	245	215	442	189	347	335	326	730	168	103	76	-9	119	229	315	79	371	423	415	288	417	377	144	188	413	604	306	528	411	806	476	743	479	134	420	593	419	139	341	228	179	241	661	400	116	125
243	-69	156	159	215	-75	144	36	15	91	373	312	209	282	106	403	105	140	1131	10	382	226	332	290	198	159	81	116	156	193	-4	58	136	219	353	410	284	159	336	-49	214	66	229	53	174	221	207	248	216	86
244	704	1218	1111	859	632	292	404	702	1037	692	745	871	1254	823	-52	652	385	634	-182	932	1001	596	1871	381	711	262	686	1218	882	1511	694	1450	1380	1152	955	836	611	1283	2085	700	652	830	630	455	855	1786	1384	721	1385
245	-122	-187	-146	-114	-175	-37	101	-75	-38	-37	-76	71	-63	28	256	20	-17	-1208	-362	-139	-113	-114	82	-21	-78	68	40	130	-387	22	-9	-282	12	23	158	-322	117	195	-154	-7	380	29	145	218	-157	-98	556	37	17
246	-87	-58	-18	-9	-261	-50	-46	24	-35	-25	-9	-48	-57	-23	-86	-312	-81	-1564	-395	-84	77	-42	-129	-77	-71	-293	-15	-29	-120	-31	-75	-24	-29	-37	-36	-73	-99	-88	-137	68	3	-90	-94	-84	-30	-71	-40	-34	-23
247	384	506	285	960	160	382	957	1195	409	1169	901	474	281	587	1744	901	539	1226	329	303	305	244	405	893	985	582	677	1227	672	464	292	1486	305	460	340	164	861	1224	301	243	1273	265	1136	1103	321	586	607	721	1631
248	1177	603	768	666	389	396	207	559	420	1118	668	314	592	819	1526	1579	496	-1541	-1052	861	478	314	2648	1211	838	-1717	269	308	2037	752	742	-29	1362	1244	604	1073	577	424	787	1021	1010	990	1017	602	669	1507	522	583	1122
249	2128	2540	2393	468	322	2296	1445	1250	2289	1629	2976	1370	2269	3074	846	425	953	2923	3164	2789	2383	2165	2234	2085	1893	606	906	1532	2664	3031	4306	2601	3570	5791	2435	2390	649	1446	1082	3569	1649	983	2247	1518	1447	4590	1867	1277	4411
250	220	325	165	-26	-111	466	-124	20	505	96	288	80	-5	129	-401	134	-100	-569	-604	241	225	177	50	-69	188	-1103	54	421	459	2	-23	135	304	194	53	189	42	237	-103	131	93	265	210	39	30	78	199	-88	-74
251	983	1171	1936	1281	1545	832	2168	1236	1572	1966	623	1195	1156	4301	56	922	371	241	285	1520	9197	1781	640	2274	1198	-1708	295	29	1271	252	51	4150	865	798	670	623	543	1493	1891	616	2809	1643	772	213	1147	295	184	8869	1660
252	-4	31	31	134	256	5	45	84	92	186	73	76	0	129	-301	105	118	-757	-29	118	69	78	250	129	-15	62	-37	86	218	-10	18	8	68	214	124	95	65	11	97	39	45	-81	146	-102	160	215	115	76	65
253	-29	116	28	-4	-80	68	-133	-19	75	171	-6	-11	81	64	432	108	65	122	-110	50	31	22	412	191	43	-129	71	82	92	-29	533	292	42	256	270	-93	248	293	356	366	996	452	74	400	120	137	122	-118	48
254	1145	1203	1232	1957	5385	1173	4523	3712	1791	4137	4088	2044	1473	660	3050	4064	4186	872	3542	2368	1251	1901	684	8572	7328	1259	1149	1885	185	492	488	1730	883	2892	2740	1721	699	198	385	446	591	1859	909	1755	3527	1213	2552	1810	2361
255	542	548	460	528	1209	430	547	505	240	411	433	596	370	204	824	678	748	2660	2093	330	207	432	367	123	268	1270	540	387	793	679	356	710	150	66	285	442	563	347	649	348	-45	73	164	229	257	170	234	149	55
256	69	246	21	183	217	77	172	27	19	57	94	97	80	76	779	-43	15	325	384	-8	99	105	223	291	149	1176	95	198	162	141	45	33	-6	57	48	125	117	45	162	19	97	-3	169	8	82	195	225	154	166
257	6876	4411	6414	3841	3592	5392	3702	4634	6138	2708	5791	3111	3963	6658	6653	3923	5441	2438	4901	3967	3470	3651	3996	4467	3843	2387	4705	2489	3035	4129	9778	5948	5054	3565	7944	5219	3908	6433	15315	9403	6071	7409	3417	5289	3877	5146	4845	6593	3961
258	-733	-711	-676	-461	-209	-469	-503	-979	-641	-597	-186	-497	-325	-476	-733	-1490	-606	-421	-1545	-612	-575	-409	-701	-939	-567	-1132	-445	-950	-1855	-638	-401	-900	-581	-72	-281	-585	-746	-678	-633	-530	-873	-533	-597	-591	-514	-921	-341	-328	-317
259	14	254	2953	10	2400	232	11	39	77	62	59	898	32	-44	119	119	57	233	106	67	25	733	58	162	-43	419	93	54	-27	144	115	70	86	48	54	52	-7	41	4	83	126	117	-31	124	60	182	113	40	-27
260	374	182	280	673	1400	143	613	109	159	586	312	233	654	368	2587	486	625	-1157	5053	336	206	545	262	348	514	1250	468	188	1346	547	436	551	540	210	331	761	343	585	1033	309	595	411	362	254	291	487	285	335	223
261	3161	2938	4242	3775	4037	2237	2865	3275	4445	3601	3682	1827	5143	4018	2327	2821	3045	3018	4130	4661	4446	1818	1453	3734	3070	5163	2591	3147	3659	10996	3976	5256	3344	1127	2170	2038	3419	2743	8999	3177	3815	3878	2356	3284	1876	2429	1784	4554	1888
262	384	151	169	-49	313	184	18	44	142	-11	50	319	57	201	-446	178	233	-2066	-33	115	284	240	-106	63	87	-332	12	174	-250	-50	-116	117	234	2	114	202	-33	-2	-7	-45	-59	184	3	20	1097	210	-150	442	96
263	652	186	1255	219	660	410	525	311	906	545	728	992	355	1554	1051	728	1008	561	362	1097	369	997	1040	534	424	1274	1101	999	259	239	1392	1042	981	1122	2749	67	389	1364	800	1064	1169	1235	719	1285	2967	1111	569	1099	838
264	185	1281	2198	967	2208	769	1336	1878	995	3139	2007	1473	2713	2641	667	2158	1945	2940	1983	6305	4181	1660	3596	2357	1831	849	436	2284	767	3213	1262	1870	1912	1719	1369	2506	947	1467	813	2145	1085	1585	1960	1020	616	1428	823	2042	1635
265	-133	-236	-61	-39	9	-89	-29	-36	-110	-165	-52	16	-15	-70	301	-48	-130	-986	-258	-110	-158	-23	28	-133	-103	-31	-30	-38	-54	-113	-12	-85	84	-24	15	-170	-118	-70	-293	-43	-190	-46	-152	51	21	-147	99	71	7
266	142	88	205	67	-8	32	94	15	208	171	112	146	113	144	254	52	141	-1057	-352	110	248	114	199	78	186	-43	137	167	-23	78	106	310	34	212	148	170	68	206	308	79	122	166	172	132	208	161	171	167	80
267	18	27	-39	75	-160	16	7	3	-24	-4	20	177	53	58	899	22	-148	-1913	-164	6	28	-7	0	20	-90	-138	-40	56	-99	-57	-41	1	12	-9	12	-73	-17	55	-185	31	29	-39	-32	-5	40	-9	85	42	-38
268	91	441	54	191	247	123	185	142	144	20	-39	-182	16	8	174	183	214	-312	-863	73	33	23	252	180	75	-88	253	677	147	1267	-21	82	208	232	143	1807	512	1417	-10	247	339	338	696	137	125	1603	316	8	590
269	10323	21468	18343	8983	6289	13086	7046	10333	13086	11365	10075	8028	7008	28508	5583	11354	8902	7437	12949	26386	18544	9155	6528	13534	18208	5321	13624	12705	15065	17288	17856	18457	3864	9405	10517	13274	7384	14541	23632	16747	11397	5079	6793	11845	15623	31120	12853	5379	7984
270	-29	490	408	-18	96	179	-143	-153	130	269	55	29	-27	61	1270	44	-136	41	155	128	420	50	-168	38	165	-41	7	80	126	-40	-131	142	-64	-28	-66	-54	64	-53	-291	104	-179	9	-164	-154	16	-204	-107	-128	34
271	508	473	151	180	19	890	454	408	885	615	1950	2243	264	812	518	157	169	-1140	597	424	1023	2144	605	551	331	223	625	88	474	770	294	283	760	1115	374	902	215	692	680	100	428	764	336	216	4052	292	1691	573	84
272	3444	2115	2662	1133	1335	5605	5232	1827	1650	2535	1973	1949	3141	2352	-123	1255	1653	2790	2395	3533	3900	1986	2346	1226	2362	1079	1432	2237	1679	2445	1440	1926	1570	2716	2000	5698	2223	2555	3241	1339	1653	2821	2002	1022	3017	4154	2244	1137	1409
273	641	418	612	76	146	510	433	282	475	185	750	505	598	355	605	196	657	532	798	338	708	277	466	257	285	115	339	653	41	68	594	460	780	626	355	79	545	665	654	856	402	517	430	189	220	603	527	410	637
274	-63	184	202	46	147	161	32	204	346	58	223	72	461	173	-426	-15	80	559	-143	194	229	166	125	114	97	-50	67	259	329	449	152	219	145	123	235	325	47	154	94	80	22	0	243	153	141	246	210	225	204
275	255	98	515	106	194	206	104	267	350	409	452	231	26	231	216	158	230	409	550	485	224	82	203	239	264	-59	173	478	332	250	168	186	11	238	373	59	244	588	223	110	250	637	169	167	83	414	229	85	154
276	3193	3963	1328	998	643	3872	828	1232	2069	1806	3322	2483	2355	1506	1943	389	950	3215	2388	3795	2619	2828	2686	1140	2571	905	1232	3733	3678	3430	1623	3442	3647	3580	2275	3431	1878	1786	2795	1894	2107	2952	1182	920	2359	3281	3570	460	1402
277	430	763	1505	311	545	1170	155	370	746	580	577	690	314	659	2208	414	145	85	1095	793	857	757	634	532	593	282	248	515	418	746	436	768	940	909	837	855	202	516	446	709	271	451	528	299	946	763	682	470	844
278	95	124	179	118	233	244	152	162	132	128	-15	84	167	72	-175	51	62	444	450	116	176	134	270	215	119	4	105	131	413	216	112	148	28	221	70	161	27	74	121	97	144	118	291	58	55	177	217	112	187
279	-41	54	-134	-162	-650	48	-108	-207	-47	-50	-5	-99	-199	-181	-1823	14	-554	-3769	-2391	-38	-106	-197	253	-206	44	-448	62	4	226	-228	-352	-3	-107	324	77	104	-268	-307	-294	-202	-147	-100	68	-253	32	62	93	-200	-74
280	49	931	584	741	352	702	253	564	658	-55	317	449	474	376	878	488	571	-624	1084	238	922	135	385	827	247	-928	-38	327	753	446	444	-52	757	591	-157	312	317	406	40	655	416	22	176	65	227	36	364	348	568
281	487	1337	666	914	812	952	755	761	435	601	970	465	694	907	935	588	577	732	477	1034	743	659	343	907	926	611	543	668	1105	898	943	940	964	780	691	283	1075	830	1480	1120	723	740	863	677	720	775	911	961	840
282	2161	1566	1291	1217	858	1784	1517	1077	1451	1073	1632	1185	782	1242	1926	944	882	435	1254	1003	1652	1235	1887	1130	1382	1068	789	1231	2019	1199	4041	2206	2296	1753	2974	2243	1747	2155	3574	3082	1597	1979	2580	2609	741	2670	2190	1387	1280
283	1636	669	787	500	131	887	220	600	836	600	567	323	335	318	-162	359	262	-262	474	575	1453	364	430	556	708	726	149	2347	1397	616	661	2176	1125	801	475	391	582	130	403	500	917	617	895	162	1671	1750	785	333	466
284	3100	7674	7767	1644	2373	8870	3243	3571	5077	3851	5635	4175	4051	5785	2142	5367	4134	3912	8774	11165	3317	3214	3330	6928	2923	3514	1980	2548	1605	3301	5532	7197	2732	3803	7409	3273	2645	4837	16386	5643	7452	5494	6238	6672	2661	5864	6002	6146	3811
285	414	460	640	350	574	740	708	401	741	260	319	266	155	450	737	361	203	1565	1107	464	209	140	335	369	372	943	181	169	24	212	194	355	313	469	317	95	-195	192	272	271	750	181	495	462	295	417	223	316	131
286	13078	16900	4728	4290	4212	5502	5350	9227	8681	8565	7904	8094	7259	6244	3167	2966	3762	7247	7844	9232	8819	10277	6345	8241	5737	7376	2995	3866	4706	4078	4778	5495	8080	5565	6831	5942	7959	4178	8078	7819	5310	9135	4935	4431	15926	6446	6851	5963	3687
287	-20	23	-5	-45	259	77	-26	40	34	11	58	-16	38	18	182	10	-40	1315	486	8	22	9	-25	101	57	178	11	10	-56	-46	-57	78	28	47	26	14	77	98	-4	47	-22	-22	26	57	16	31	101	44	28
288	6	132	58	40	221	-4	-10	82	71	-52	19	20	57	102	-1289	93	42	-1902	335	85	116	27	-55	12	108	14	1	23	-209	303	114	6	-3	-13	30	-257	-4	16	286	66	94	-245	90	56	-10	57	182	105	130
289	96	203	178	243	351	114	131	58	97	153	124	166	188	74	600	209	65	1024	213	105	119	171	153	216	146	289	48	175	242	111	78	243	113	138	85	215	113	89	66	108	65	176	146	165	136	108	195	130	193
290	207	150	43	-81	-920	245	166	115	139	-82	-186	87	25	45	1027	174	-92	-2965	-2565	159	170	-228	134	66	-148	-754	87	207	1015	-199	-70	-39	-34	-25	-37	-231	112	-179	248	72	411	86	174	-5	-32	166	134	-136	-78
291	-137	18	-46	-21	-104	194	32	-74	-52	-29	-111	-20	-129	-9	101	-85	158	-256	477	-78	-52	-160	-263	-78	-218	-184	-24	43	-23	-174	-16	110	105	-116	-203	749	199	-87	1612	74	25	-181	14	-21	-125	42	123	-23	-7
292	93	103	72	352	235	49	198	52	556	341	299	101	125	69	323	-29	19	385	-82	164	167	153	239	323	833	-90	162	578	311	120	81	322	427	250	177	229	232	24	-11	655	263	1064	262	536	517	129	152	140	57
293	618	494	1017	124	446	287	434	556	612	370	607	551	543	672	482	348	610	-301	503	897	691	489	1453	752	603	287	445	750	819	323	844	1509	873	873	1226	895	574	809	1029	659	681	465	297	859	1279	1088	948	468	772
294	401	404	380	388	169	346	174	301	339	282	337	313	50	299	360	417	392	1013	719	294	360	395	278	333	243	1676	272	321	1049	56	256	488	187	209	193	458	321	482	448	265	209	244	382	236	487	373	228	230	248
295	-326	-181	-69	-157	-188	61	-46	-555	-3	11	117	-241	3	-199	-221	-98	374	-1823	-3209	160	37	40	277	-63	143	769	54	27	-475	-64	33	-146	112	101	43	40	-93	22	-428	-81	-30	-315	203	91	195	-405	-19	-60	250
296	626	2447	1576	1049	233	546	1203	628	381	418	1067	1412	650	458	-434	217	596	1268	388	377	1086	1276	896	1028	235	765	336	892	665	555	547	998	895	680	344	711	410	3522	1673	1112	1087	86	934	415	433	575	411	187	566
297	666	460	1128	714	601	958	1231	1493	1825	693	2736	2087	1169	2357	-78	867	924	184	2412	2926	2110	1906	1462	1261	1029	324	997	470	442	505	775	594	861	1080	804	476	264	1264	900	259	1261	1721	901	585	905	690	700	1043	815
298	1416	341	789	1098	1496	585	797	726	869	570	689	998	814	675	2507	1089	1397	4727	2659	703	699	991	690	566	1019	3057	950	635	1495	1099	934	1107	768	372	280	665	571	668	813	730	650	412	806	679	703	539	230	569	603
299	86	-99	25	22	55	96	-95	81	65	-23	48	-79	-68	-45	645	-81	91	-52	154	-77	-36	-107	-35	-70	-162	-717	68	21	-344	75	-26	-28	-21	-78	-28	16	-71	-52	-227	-56	-25	29	-17	-100	-27	-368	42	-17	61
300	28	33	77	127	-489	-1	-44	72	56	138	62	50	43	110	85	-170	375	-353	-687	29	123	4	-99	23	90	213	185	8	184	179	101	154	78	25	38	272	7	-75	113	130	98	101	51	-16	3	5	21	4	52
301	604	2327	1953	1862	1745	1973	1315	2011	2149	889	1413	1097	703	2451	1630	1364	3129	1991	2143	680	1261	1103	299	359	1242	2029	1876	1373	1634	1477	953	2094	790	680	505	719	1232	2899	1732	1523	1817	2012	966	1325	1419	1059	585	1153	904
302	-411	-492	-274	-485	-404	-144	-96	-71	-219	-648	54	-53	-179	-293	177	-127	-636	-991	-835	-170	-460	-439	-196	-301	-588	-1289	-85	-314	-821	-606	-430	-283	-386	-183	-138	-590	-78	-199	-696	-23	-255	-286	-50	41	-224	-75	-250	-123	-49
303	198	402	806	12	196	304	153	457	415	116	596	400	627	301	247	164	113	1112	-199	114	438	208	130	169	270	-534	171	576	756	-2	409	309	325	780	740	422	22	1078	4052	308	170	677	244	272	189	473	375	226	311
304	-34	213	-30	-105	-11	43	0	86	48	1	40	82	95	76	476	135	130	-617	165	81	52	8	258	-66	22	1006	77	69	8	-81	-5	-21	88	313	97	-5	177	63	134	239	53	144	-6	172	80	-12	50	41	105
305	6114	4822	7087	1845	2391	2789	3366	1526	3067	2687	5060	5111	3745	1777	1654	1249	2354	8155	4245	4135	7684	4911	2457	1410	2113	1179	2119	2287	956	2382	1849	1765	3914	2757	2812	3935	2146	1533	6190	2614	1439	2217	1251	1183	5420	2097	1809	1259	1809
306	128	268	1142	-851	549	756	525	448	995	280	655	674	182	1479	-1178	-131	34	-7193	-6229	1039	773	-88	711	-108	-211	-3025	1264	454	-1230	-214	1637	575	891	182	1272	-79	-442	872	-803	499	436	63	-6	1988	327	-269	864	895	1585
307	671	915	890	743	1446	982	784	1068	787	1188	895	829	1337	757	-550	818	705	1032	1890	3436	1690	844	1175	913	685	472	693	875	881	913	837	625	572	552	1062	752	665	672	544	1002	528	217	863	788	747	1178	921	682	1343
308	-100	2	98	114	-64	34	18	104	43	41	52	-58	96	13	-237	-22	-179	-1559	174	92	43	9	322	-90	52	-31	44	-185	-34	12	66	13	231	208	73	28	-109	150	-1	219	189	396	138	156	214	-55	-1	19	-5
309	3648	3677	4271	3444	3524	4869	4119	2318	4043	2783	2671	4646	5489	3616	3544	3769	2782	2889	3518	5119	2482	3885	8528	2551	3006	2756	4482	5528	3855	3988	6086	8554	10322	3511	6763	3062	5056	2806	7120	4622	6742	2027	3511	5429	6314	5465	3971	8485	6190
310	953	883	519	369	867	422	105	431	791	945	738	468	551	804	1312	331	1244	889	-156	737	388	801	805	683	886	528	749	672	583	706	669	701	519	330	829	876	156	1143	386	669	543	256	641	468	1296	1833	723	1160	511
311	-163	1376	-39	-896	-683	-33	154	-260	-11	-339	-216	11520	-73	-218	80	-560	-719	-824	-263	-120	-144	4481	-117	-143	-400	-715	-183	-340	-481	344	-422	-45	5	-216	-117	-200	-357	-128	348	-573	-583	-105	-85	-337	-448	-298	-408	-479	-202
312	468	263	296	589	1102	729	359	404	153	148	201	74	258	96	1579	570	908	2368	2352	64	121	763	135	-58	729	553	80	294	925	736	300	540	146	3	131	13	357	151	872	855	-76	340	248	45	111	38	104	-30	-466
313	59	26	75	55	-10	1	47	14	65	29	97	85	-44	111	-1241	56	208	41	179	-11	44	33	-52	-28	93	123	91	58	194	117	118	24	-236	57	58	-39	98	96	91	-42	140	120	79	73	28	146	107	-7	97
314	-79	-50	-77	-148	171	-30	-44	28	-12	3	-73	-47	-72	-74	518	-367	-330	730	-162	-51	-106	-173	51	-153	39	-913	-127	28	-47	-37	-155	-65	18	-48	-62	-171	-41	-160	-311	-80	-139	5	-4	-70	-52	-92	-43	-89	-116
315	58	46	17	-68	67	51	-6	101	52	20	-16	59	26	71	-986	142	-4	189	-235	-78	70	-23	129	-56	-42	-24	19	5	-96	72	-8	4	64	-53	-37	-70	-6	-12	60	103	47	149	-2	57	73	-77	-37	-93	13
316	-24	-22	169	55	-122	101	70	-20	179	-37	-69	24	-77	-81	-1292	-164	37	-592	-166	58	-110	39	-199	-60	12	-131	-55	69	-19	-17	10	124	98	36	53	-170	109	49	68	28	15	-129	111	-112	195	-22	61	-18	-45
317	-389	-267	-224	-265	-389	-305	-290	-450	-249	-34	-181	-295	-188	-300	-505	-164	-115	-1920	-1467	118	-274	-341	-164	-166	-313	-514	-24	-372	-45	-321	-128	-274	-146	-60	-169	-261	-183	-46	-455	-243	-344	-246	-126	-157	-110	-66	-207	-163	-171
318	111	294	82	-183	31	-340	127	32	104	-59	-6	56	65	100	341	333	132	-369	-101	-5	-12	41	30	38	104	219	71	149	148	-24	161	128	14	-2	24	-7	136	3	259	12	104	-109	126	102	19	38	57	33	92
319	-1087	-807	-458	-1169	-181	-426	-603	-562	-619	-349	-641	-242	-150	-536	226	-930	-345	-3931	-2805	-118	-442	-531	-841	-386	-375	-2494	-359	-347	-1646	-860	-979	-644	-365	-341	-231	-768	-786	-188	-869	-746	-814	-146	-466	-550	-351	-618	-253	-415	-456
320	-11	-42	-30	-97	-40	48	-70	-38	7	-50	-37	-62	-24	-36	-466	-66	-207	-827	-42	-26	-32	-26	-115	47	-16	-211	-48	61	18	-134	-89	-3	-76	-22	-72	30	-76	-48	-144	-49	-23	21	-7	12	0	54	-27	-4	-12
321	153	383	611	148	124	187	156	118	252	263	225	50	173	80	-626	155	221	573	343	531	262	204	765	174	320	-127	67	1032	-140	314	23	182	302	464	508	211	308	486	246	160	351	323	797	277	390	610	607	40	287
322	181	37	89	135	-114	183	470	440	76	190	221	84	34	63	61	210	104	-1067	-162	52	42	36	310	344	312	30	-4	98	206	116	156	69	236	409	171	-7	-23	-17	145	1	37	45	64	116	50	83	150	-25	515
323	71	89	159	75	372	90	118	136	145	141	51	16	31	165	-306	316	-25	-1439	86	90	109	-6	181	128	142	281	108	45	109	104	5	272	85	195	141	105	79	112	158	76	127	-51	272	248	60	598	108	75	34
324	-179	-352	-261	-390	12	-202	-274	-350	-257	-497	-332	-220	-218	-102	-1051	-60	-161	-60	-853	-221	-233	-269	-630	-277	-241	-724	39	-338	-376	-506	-259	-437	-117	-79	-367	-66	-387	-54	-223	-198	-309	-168	-115	-79	-300	-1140	-431	-175	207
325	-39	-6	102	-102	-901	63	-207	101	46	-67	6	96	114	67	-344	78	172	-2973	-2453	-29	28	34	-317	-7	-49	-1777	-7	118	194	252	-1	29	-45	39	85	-43	-21	180	292	-39	20	82	193	135	57	-139	-85	15	-111
326	673	229	515	334	-19	455	245	392	234	642	256	384	300	446	360	262	688	-2604	-662	356	895	586	552	466	673	-226	183	371	1722	341	366	413	310	485	254	1062	478	1108	909	594	158	280	72	395	503	345	361	251	188
327	67	201	59	-107	81	118	-189	-211	-7	118	9	-57	132	-81	100	22	39	-1582	-386	73	44	71	134	-49	-94	690	101	32	147	292	-110	22	-10	65	-33	228	38	88	3	-150	95	48	120	-39	21	145	-67	19	54
328	86	-41	11	-22	3	108	-6	113	30	9	135	74	137	49	548	-255	78	-936	-158	58	91	92	137	49	89	169	139	84	-204	-68	29	60	93	47	94	47	131	-72	290	80	29	370	-51	107	19	35	72	16	124
329	-15	-22	-10	-15	-251	-30	26	-19	-1	-128	-33	-69	-10	10	-81	2	-65	-551	-143	-61	-92	-149	-157	16	63	-550	-126	46	-139	57	-133	27	-25	-18	-25	-29	-40	-37	-72	-12	-9	-118	-3	49	-39	-176	-104	-62	-74
330	280	503	244	374	21	321	322	421	229	413	291	235	100	208	739	243	312	708	583	210	234	235	335	373	372	1950	283	207	777	-86	250	459	112	215	195	327	247	564	713	426	191	385	335	208	310	454	150	98	83
331	124	7	156	152	207	181	490	158	72	65	74	250	96	50	589	219	290	1311	244	42	37	123	269	19	165	602	-5	106	1270	97	69	183	2163	119	41	35	187	235	107	-127	8	132	107	46	183	188	-64	-9	4
332	1435	110	181	-219	251	782	643	191	100	472	624	1056	553	1371	-193	314	1090	462	678	391	794	919	596	188	364	677	484	261	242	95	1068	57	778	2107	972	1066	777	859	1789	1177	1495	2526	985	1864	1382	686	1723	728	452
333	811	2381	1753	817	1427	1021	581	976	1195	824	648	1361	795	1352	1646	1685	1453	737	-2798	829	1166	1412	1262	918	859	152	849	1307	1675	1173	954	613	1091	1055	621	1141	404	939	1522	659	817	1050	847	518	946	1083	631	1084	783
334	365	746	699	550	581	427	256	506	880	857	1311	674	593	502	-506	293	344	575	258	1564	1505	993	445	578	686	325	452	503	282	674	518	1009	792	837	962	540	354	862	1113	606	511	517	665	545	866	960	843	478	758
335	-152	-11	60	114	162	13	3	-176	-140	404	195	103	202	92	407	388	82	813	-3018	99	178	346	212	-8	100	-563	-39	-33	143	115	55	-70	-68	272	176	193	133	17	-697	48	40	602	375	39	-16	227	278	-20	37
336	-465	-474	-535	-907	-451	-387	-250	-706	-348	-328	-800	-392	-377	-605	144	-320	-578	-1063	-490	-297	-551	-172	-195	-522	-537	-330	-276	-513	-780	-591	-734	-406	-456	-249	-171	-329	-391	-920	-1223	-593	-392	-340	-391	-54	-311	-477	-387	-130	-292
337	525	1181	1037	797	938	1531	1033	912	1000	1054	1185	1551	1659	523	418	985	1756	-1846	1823	619	1619	1784	2173	904	965	675	1169	996	1381	1514	1210	940	838	1247	1205	833	1474	359	584	3336	1550	535	1282	1180	748	567	832	638	912
338	299	-549	-243	79	240	70	-141	-184	-194	138	-105	-129	140	-99	2137	84	112	-81	-699	-106	-114	30	198	-275	-126	-95	315	220	64	-131	-27	-116	-174	4	-67	-135	3	245	-629	-124	-113	-185	103	21	69	-250	-274	26	57
339	9	207	37	74	193	51	112	57	26	118	35	34	-72	66	575	233	370	2	460	91	73	117	-237	-4	-12	408	86	35	153	147	172	84	99	33	135	36	102	105	24	144	166	64	210	159	-35	32	71	89	84
340	71	203	935	767	510	23	517	750	395	1263	823	111	121	16	-310	383	411	2284	1266	59	173	75	77	563	773	284	14	92	-161	-14	-8	406	233	638	130	218	57	-108	-30	60	37	810	149	205	271	213	208	168	353
341	3405	4801	4422	1481	3065	2761	3944	2783	4713	2480	5142	4420	1962	3641	1875	2170	2317	2067	3226	2634	4080	4145	3404	2472	3814	3253	1949	3334	3096	1791	2113	3749	2417	5861	2484	2814	2787	2830	2900	2404	2247	4345	3298	1605	8136	2912	4289	9355	1485
342	13205	12662	9659	10241	6597	7440	13412	10868	10792	8972	10588	11371	11753	14803	13614	10742	18780	28973	25618	10647	10782	11429	20796	8470	12391	12538	22554	14251	14409	13972	27956	14312	61758	24674	20019	7675	24391	20828	26325	19800	23310	22629	18117	13276	15389	12396	17342	14226	8965
343	177	227	333	-34	86	386	70	-11	400	112	430	187	251	282	59	44	12	-823	148	623	828	213	449	296	365	-58	46	399	292	313	493	416	688	734	755	306	50	746	169	120	199	341	167	346	185	551	445	349	121
344	41	87	879	16	-209	29	-13	-4	7	20	-15	124	53	27	-327	18	98	576	397	-37	125	22	177	200	147	52	-51	124	-38	25	-52	-25	-2	12	28	-90	16	-39	-102	-18	4	3	-39	-67	92	210	131	-61	-23
345	163	80	112	107	-127	98	3	56	17	34	70	157	133	5	-413	-64	-187	1498	-354	111	7	81	43	220	205	-135	25	13	41	-71	-91	-77	-2	50	104	99	58	87	26	114	8	56	111	-20	90	109	119	4	-22
346	253	388	184	365	316	605	188	187	218	224	169	189	391	255	-62	322	239	-306	779	157	201	368	482	258	225	786	211	595	787	640	237	506	109	377	77	371	268	289	508	87	244	321	299	171	196	179	47	285	107
347	315	467	588	529	468	507	440	628	711	561	673	580	1104	751	1305	475	224	1891	1413	728	792	567	833	606	530	2147	560	590	1322	737	762	1091	562	598	610	1698	641	763	483	782	482	397	700	1043	384	498	755	775	834
348	2649	1076	881	1015	1202	2155	2175	1703	2910	944	1896	2494	1388	1617	674	1678	964	858	1147	1450	1674	1738	1593	1157	1199	1559	571	2010	1799	787	1238	1505	2037	2220	1551	616	2071	810	1961	1453	2059	1007	1945	909	1417	1979	1423	2048	1324
349	-157	-128	-170	-109	256	799	-85	-90	-154	-30	-39	4	-55	-119	117	-49	113	209	-158	-76	-63	-97	-215	-63	-3	34	-19	-102	-298	-227	-88	-137	30	-99	6	-111	-145	-58	606	28	-75	-68	-140	57	-109	-102	-19	-70	38
350	13015	12137	16545	16136	8077	11713	7652	11357	7518	11879	7998	5067	9290	15693	9862	12374	10419	7636	10493	9814	13949	3538	7255	10947	8002	5325	11808	7970	11039	15897	14081	23033	8548	9160	7237	15489	6790	15317	22842	11015	14746	7007	11427	11669	8733	18443	11347	14728	16703
351	2437	2062	2039	1159	2107	3267	2223	1939	4831	899	3449	3255	2327	4258	1425	1916	1776	2147	2288	2263	1729	2683	2135	1493	1458	2684	2250	906	1576	847	4363	1883	1046	958	1141	1258	2706	2067	2565	959	1792	1836	1167	1320	2474	980	1171	3634	1407
352	1950	2189	2450	2988	2359	2514	1859	1781	1854	2447	1770	1913	1668	2309	1991	2703	2461	2376	1547	1451	1678	1584	2454	2617	2176	779	1296	1330	2349	2292	3700	2024	3251	2007	1803	3784	2284	2042	3506	2976	2122	4587	1659	1293	1452	2771	1093	1592	2250
353	-54	-54	-12	325	-62	-148	-54	-71	-56	-87	-121	-98	41	-13	-478	133	185	-277	-679	-3	-84	-96	-268	25	162	454	65	2	-247	-99	-39	52	116	10	-72	-144	-118	167	71	-12	76	-48	173	175	56	39	-26	46	56
354	1287	1932	1043	778	1319	1542	1700	328	1274	580	1372	1306	514	683	2373	878	373	2042	993	807	1546	907	762	504	1132	2278	1128	867	2795	1593	1576	2483	1447	1087	613	1023	888	692	1499	1368	1170	798	880	1207	969	326	924	476	791
355	-194	-133	-98	-19	103	168	-34	74	-85	164	268	164	61	38	793	94	467	259	-78	84	180	208	269	195	285	903	23	-106	-89	183	122	80	174	148	1051	113	74	439	122	50	73	531	56	436	54	412	33	366	37
356	706	705	685	230	244	523	403	399	1055	229	766	124	414	332	166	240	363	1487	527	451	717	393	583	325	372	147	163	605	886	624	932	317	646	848	716	360	460	529	460	682	223	485	675	482	137	416	334	437	283
357	377	465	541	334	551	359	259	361	280	951	947	247	530	299	966	351	374	122	288	648	861	728	820	1149	588	1204	132	404	577	409	233	588	659	636	451	1391	418	418	397	160	228	645	193	341	555	1031	851	177	201
358	2118	3151	4916	3086	2858	3309	3452	3543	4922	5184	4273	3925	3410	3574	220	2429	3956	6198	5646	4177	4416	3846	1156	5014	3463	2584	1987	5552	867	2636	3216	5409	4369	5303	3225	5946	3029	2721	1981	1877	3330	5154	6914	3320	8893	3932	5689	3773	1965
359	213	29	73	378	-55	65	163	401	134	409	304	57	284	385	545	412	236	1968	1958	129	286	153	782	319	240	1669	213	256	221	457	365	322	241	430	227	450	395	131	721	419	275	235	468	255	333	537	406	498	255
360	333	217	97	324	392	391	-29	29	279	197	36	-44	-91	319	104	208	745	-1994	170	74	129	104	346	164	532	922	54	487	834	542	78	223	36	244	141	272	-76	308	454	132	234	200	399	122	133	159	77	214	115
361	268	74	-65	285	153	725	364	-1	-118	626	-10	171	-30	117	463	-265	-417	-587	453	-50	2388	350	406	-105	58	-184	-345	407	186	-232	-105	166	14	329	-110	-234	-329	-433	-271	-225	76	210	103	-50	-163	-57	-7	-186	83
362	304	15	45	-1	-81	81	-14	-88	505	9	41	-12	-120	236	-492	-169	-160	-1201	-850	-107	162	-20	628	586	527	384	420	1096	3	108	1062	312	2782	450	1683	21	353	464	-53	1038	1077	639	35	656	5646	90	353	1726	91
363	57	169	41	212	165	98	69	234	139	260	310	230	98	40	-172	45	79	306	-570	74	203	128	800	415	350	40	41	165	242	240	123	228	308	505	414	418	182	276	39	270	178	74	61	131	46	303	767	136	377
364	-33	75	406	357	1040	190	216	222	75	-134	107	614	278	437	1487	95	954	5203	2376	325	86	410	-326	298	273	492	401	136	556	27	-30	197	406	-1	-22	-81	98	529	310	249	402	232	460	413	248	-117	-39	477	169
365	243	196	635	591	619	233	272	633	541	1144	953	477	743	573	1076	341	447	3	707	626	587	799	849	683	1071	471	756	811	1215	629	476	841	457	563	1672	1691	354	426	904	497	510	496	153	148	539	651	937	473	234
366	11	70	53	212	-54	266	218	180	87	81	108	183	171	128	-168	127	95	-416	407	119	293	1	40	123	144	107	132	235	-46	187	100	-54	136	643	147	544	84	141	254	136	157	612	302	262	62	-119	105	52	95
367	173	338	340	186	315	161	256	266	356	366	438	362	373	329	757	245	241	1770	1031	621	511	440	384	727	259	238	-24	199	205	132	53	442	436	271	199	604	115	192	217	176	158	366	193	81	385	470	380	217	228
368	2028	4461	6535	3982	2280	2843	3121	2996	4628	4933	4178	5066	6569	5013	1646	3334	3004	1138	3768	4999	5093	4263	5596	3838	3207	1630	3403	3183	3464	3625	4394	2389	5913	5422	4271	6654	1783	4209	7491	3083	4976	4751	3124	2916	3663	4817	4601	3568	4130
369	191	282	250	222	37	219	235	292	295	406	357	213	164	215	-789	141	5	861	416	294	523	310	364	405	588	259	103	373	298	168	140	158	387	533	400	307	137	450	266	189	256	383	201	206	189	444	367	288	274
370	107	790	497	396	1385	923	133	245	253	341	163	246	596	262	337	567	104	816	1172	705	860	401	123	190	267	240	326	194	11	186	52	160	150	74	51	-54	54	347	-50	61	51	96	208	311	351	55	127	285	137
371	2353	144	559	854	1929	936	1766	2461	2626	571	1649	1801	1095	745	-595	1674	808	2060	-66	225	244	815	675	478	825	826	3064	1744	400	498	482	2408	1049	2394	284	625	6302	2574	853	731	116	6780	1847	2540	160	1114	350	1731	1515
372	-288	-215	-285	-259	-134	-274	-160	-305	-163	-302	-236	-192	-100	-97	-259	-314	-505	-2025	-958	-145	-183	-284	-133	-161	-125	-1191	-132	-235	-427	-398	-417	-376	-389	-94	-121	-259	-326	-489	-625	-266	-155	-265	-184	-269	-242	-175	-134	-253	-102
373	-12	8	176	44	278	118	125	174	47	52	47	25	-4	29	214	224	97	-506	270	262	88	52	165	122	5	147	-28	29	-32	33	56	99	-68	58	81	74	97	137	-74	92	299	43	-5	110	156	-69	-170	101	-4
374	1002	838	1038	1028	948	1557	739	1079	965	963	1387	989	763	967	1488	595	1171	595	127	1681	753	921	768	914	628	1148	1450	1057	1727	1120	1210	980	998	1690	1534	560	1289	1177	614	1940	927	732	1561	2490	1295	1359	2177	806	1040
375	5972	3971	1518	1261	1920	2713	7631	1835	3971	643	1255	4476	1707	1664	3873	1556	1907	65	1463	1491	2674	2746	697	333	844	459	3155	1151	3681	1335	1054	2096	1571	801	987	748	1493	1412	1964	1653	796	1884	399	685	1952	949	1106	3388	864
376	-25	153	131	-17	319	910	127	136	74	-38	-11	744	531	10	-518	59	136	-246	-240	154	-8	915	169	81	-17	-264	124	71	-351	-129	206	235	-81	132	10	-168	12	649	-155	21	48	184	-7	23	208	5267	297	3	73
377	226	237	127	77	124	209	194	143	327	108	602	213	216	53	-1278	142	-12	-222	421	185	88	268	790	423	140	24	166	351	1535	334	237	164	544	650	453	561	335	201	82	212	352	133	337	233	440	721	598	98	139
378	674	1951	1293	1726	1139	2235	717	1885	2049	980	1411	793	1920	1317	1517	1237	1253	1355	500	2047	1296	848	1743	1772	1372	1178	896	1612	1955	2809	1003	2900	1932	1094	1443	1102	1443	1182	2834	1623	1300	944	1335	1089	1089	1439	1060	1807	1540
379	-35	58	3	347	33	87	134	140	181	258	116	83	110	48	156	30	-56	612	381	79	33	13	356	124	102	4	141	107	232	142	2	306	23	59	151	37	120	225	204	18	204	389	542	11	106	78	128	72	118
380	84	158	81	127	36	228	72	102	88	126	71	44	153	165	374	291	312	46	460	82	91	250	278	46	197	211	113	128	270	220	159	177	89	70	51	86	156	201	287	155	57	103	60	132	67	150	111	161	350
381	371	362	167	1	79	138	216	287	344	292	206	304	924	388	126	457	438	38	56	161	285	24	332	685	138	-48	451	208	-83	43	161	274	212	166	121	151	-13	344	204	187	97	375	197	174	158	33	125	237	145
382	67	-14	66	117	27	31	4	80	13	-156	6	16	-2	-2	411	131	-28	-413	-71	-3	62	211	47	16	56	-77	57	54	173	60	-49	53	30	77	-4	103	45	28	36	26	81	-10	43	-25	94	82	92	14	218
383	72	-76	-77	142	551	-27	56	157	69	80	39	-28	85	10	-586	238	202	687	142	81	21	31	146	164	18	206	85	150	92	30	148	96	-15	54	-8	222	110	495	275	30	83	50	-35	-66	60	65	58	40	-32
384	-17	94	41	16	-69	-10	-14	74	72	-357	21	-16	36	-12	-196	-110	18	-31	52	36	-26	-69	167	-3	-37	-448	41	-8	29	90	-26	20	-33	62	21	-14	-44	-50	132	-25	66	96	-1	-4	71	-27	89	10	77
385	456	592	458	699	447	493	333	277	503	326	323	289	188	330	707	265	459	1163	403	230	513	306	511	904	557	285	364	221	1023	494	419	761	217	430	284	390	695	722	773	339	707	425	830	735	127	347	564	608	344
386	6020	2195	2262	2009	1760	2089	3960	2060	3007	1701	2758	1987	1353	1557	1571	1174	1331	2305	2272	1406	2551	1904	1487	1269	1064	1874	1874	1167	2522	1577	2635	2300	3159	1674	1908	2599	2361	2029	2513	4546	2807	3158	2210	2672	4700	1372	1856	10054	1740
387	2173	1310	1862	1402	2762	890	3011	1990	2992	2306	1948	2348	992	3131	3131	2982	2487	3111	3359	1186	2083	2198	1610	1041	1944	3603	2144	2057	3240	1435	4047	2364	2067	2106	3737	1520	3466	5907	5410	8323	4720	3554	3158	6213	2515	1673	3366	2776	2418
388	2121	3009	1481	962	1050	878	1995	2247	3693	1852	3427	1540	2012	3000	2339	1012	1435	1087	3946	2322	2631	2075	2186	2009	2261	773	1442	2794	3413	2113	3332	2850	5345	3994	2742	2768	3677	2241	2282	8719	2488	2169	4034	3872	2402	3585	2503	2003	1741
389	226	323	274	344	438	204	101	236	302	187	268	160	198	299	1062	309	142	1644	1166	198	272	246	324	290	271	42	192	322	536	343	467	229	173	152	156	446	310	376	542	199	283	222	256	215	241	137	195	290	243
390	1119	1432	1257	582	1227	703	852	1228	1538	215	985	914	719	1557	1045	769	601	2077	2067	199	631	1483	1107	831	1076	924	784	1593	739	668	455	1426	166	597	351	532	715	740	826	736	514	292	754	138	1309	659	475	1589	202
391	2428	3883	16984	14784	4257	1759	5392	8664	4339	6315	6637	2139	2723	1345	3916	7398	11071	12345	5096	2183	7427	2456	1792	9280	9616	5219	2058	3929	4264	3316	2142	10244	4631	3794	3332	5163	4497	1243	3546	2658	2493	3049	2159	5037	2603	1397	4287	4186	4207
392	765	3480	1415	1625	2189	1366	5256	2234	7808	3606	1556	4944	261	709	2084	1474	2558	1207	2797	4764	6893	4852	2245	1196	7203	1440	2107	2519	1288	2835	418	2124	190	2838	2405	147	4979	1567	810	911	4440	525	2247	1313	3427	923	1240	4243	1193
393	-48	-73	-9	-18	-135	-1	31	52	-32	-9	-23	5	8	49	50	124	88	-683	-20	-27	-32	-9	49	77	26	-116	-37	54	33	-17	-44	66	61	235	7	-63	-8	81	326	10	45	76	46	71	-16	31	18	30	-5
394	294	133	255	135	119	82	574	412	377	128	649	206	99	245	745	-57	213	1450	-301	192	160	164	299	153	563	807	300	348	278	73	229	355	93	455	470	134	78	439	55	-17	411	582	254	244	1006	332	801	476	236
395	156	9	522	-122	194	200	102	49	296	222	300	114	89	214	872	-12	47	-147	288	233	206	253	-277	-81	81	347	133	60	18	-176	195	194	163	99	542	104	9	194	-327	152	48	400	110	128	385	318	296	174	42
396	1484	841	986	1328	2334	505	953	1487	959	1205	1234	730	800	882	4930	1363	1698	13425	11709	707	631	1243	560	676	1321	3867	1397	692	1442	886	1430	1227	1130	573	850	1533	598	1462	2266	915	1667	1911	1330	1111	1312	1551	622	732	608
397	1058	276	1543	-62	521	702	200	424	1752	161	1565	696	20	1224	-426	350	311	-446	-287	1024	395	498	-9	-181	462	1107	648	496	-10	103	634	371	292	474	1320	95	9	1487	302	514	637	1070	631	354	1440	663	799	377	510
398	222	397	720	572	312	958	305	528	737	572	774	591	556	608	833	601	378	431	1257	1366	651	788	285	1029	395	514	638	629	469	419	722	500	585	1106	1131	416	937	501	159	1228	584	851	835	1154	767	659	964	557	666
399	354	669	860	660	677	483	989	726	491	1581	1707	994	837	998	592	764	306	516	273	1899	1303	1380	1515	1401	1063	856	868	1045	655	586	935	923	1460	1299	1227	1687	978	1430	1452	556	828	718	919	455	1895	1544	1389	924	670
400	438	510	266	413	535	326	149	324	387	278	225	229	290	321	607	428	763	1899	1065	130	179	314	159	128	186	874	552	251	210	327	429	383	301	200	202	166	325	717	616	161	301	551	219	257	224	298	205	99	160
401	207	351	249	446	358	22	-55	246	201	48	118	25	187	264	-296	404	335	1009	537	47	171	151	189	137	45	405	173	82	754	323	295	167	274	178	76	169	142	192	732	308	205	63	145	196	105	129	152	138	173
402	-102	-200	-28	-72	-178	40	-121	-86	-36	-24	-75	-98	-139	-102	-798	-36	-151	-449	-720	-118	-92	-33	-95	-132	-74	-765	-55	103	-247	2	-118	-9	-28	-80	-60	-126	-104	6	-100	-167	-96	-96	-129	-100	-147	-163	-150	-172	-81
403	247	411	316	100	330	330	265	257	456	379	576	508	166	212	548	282	161	596	-69	390	500	499	711	304	329	501	319	386	506	259	296	191	379	1102	180	384	257	245	192	336	304	256	151	181	325	567	344	253	204
404	734	839	1076	516	-296	579	-8	132	364	62	536	221	449	589	-613	383	472	-2761	-318	503	2309	-17	414	191	113	-115	504	512	299	546	1488	482	1333	323	475	108	178	1143	2923	272	653	1284	330	609	453	367	1284	417	1345
405	19	-101	-22	63	-110	-15	79	-10	44	47	52	57	95	3	247	168	17	552	221	109	51	22	677	192	69	-291	41	171	-18	-15	18	22	168	198	3	348	-31	-71	-43	28	33	35	225	30	288	-30	47	124	162
406	628	1023	524	307	578	935	1123	969	1362	801	679	817	753	568	216	570	255	1212	1	432	904	631	767	466	2037	394	502	1714	1842	792	215	818	436	2334	1134	481	1625	929	1207	665	502	1084	674	494	543	450	1215	716	541
407	8022	4018	3752	1814	1825	3140	2545	4653	2798	990	2830	2961	1342	2896	2100	2542	2690	13322	8581	1021	2008	2009	1085	247	1863	6237	2982	2002	4351	3349	2346	2841	1665	1042	1971	1590	2993	4185	4081	5185	1893	2755	1622	1951	1421	1973	1740	2680	2058
408	1301	1184	1573	700	572	791	471	1522	742	939	1990	1046	1017	790	1045	706	1002	2176	-31	1246	2551	1437	710	707	405	592	1901	1254	987	1462	1828	1055	1436	771	1924	1270	785	1197	1535	1428	668	734	384	226	668	995	1007	599	315
409	203	208	238	478	497	224	462	761	206	306	141	218	93	481	441	314	218	553	964	108	379	289	319	558	342	215	79	978	399	115	281	251	151	498	246	135	315	452	113	309	454	553	590	453	458	285	213	210	282
410	242	117	442	27	157	660	138	219	156	187	232	157	257	295	855	207	257	158	-91	385	92	163	187	77	179	53	190	64	-208	187	197	242	140	178	188	21	157	307	-84	41	360	-6	236	217	129	218	100	264	156
411	-132	-111	159	81	-81	43	19	58	88	-135	22	132	100	143	1564	149	-116	66	-879	-227	-117	-80	-154	-108	-119	-751	158	155	-182	181	-76	381	-47	-60	25	-116	94	131	162	52	122	119	167	-9	-94	107	192	225	330
412	1373	96	1432	526	855	607	1432	1048	1289	1206	1176	1260	345	2088	987	1437	429	446	421	1588	1008	567	1008	1315	975	1205	796	341	-207	904	898	1101	3366	1987	1632	2659	1446	1265	790	1287	1340	1737	1105	1808	1606	1655	1199	1717	1736
413	150	-692	-247	35	-244	-392	147	46	-181	-102	-40	-73	-38	-81	373	113	466	2076	1662	-256	-154	-125	166	-858	-45	2397	-51	-598	-1074	-718	253	136	-107	-84	-118	-16	-104	221	242	133	41	-102	337	-178	-29	-82	85	-37	3
414	221	407	235	196	389	332	481	438	123	346	434	156	278	87	2009	414	153	332	786	292	457	419	399	190	422	2627	203	401	510	536	99	268	144	150	323	659	300	144	438	228	137	163	449	217	482	509	294	156	244
415	945	496	591	237	273	456	485	399	658	162	428	181	682	396	-1226	278	291	-41	-261	279	456	660	939	260	479	-14	66	550	179	257	396	801	178	463	192	429	822	532	250	572	342	563	464	396	539	709	234	357	356
416	653	1796	1162	1940	1144	1206	1073	1856	1705	2691	993	775	1715	2576	1564	1168	824	1130	6230	2198	1459	683	1192	2692	1521	339	1982	1194	2684	1943	879	1982	1506	1821	1674	1641	3760	896	1212	1172	1670	2163	2891	2197	1084	1406	1655	650	2017
417	84	1	20	-47	142	-1	-6	64	49	168	29	-66	17	65	0	4	86	428	51	42	-46	-53	-89	19	40	261	-36	119	223	52	76	105	-40	-38	18	29	-60	3	197	-32	86	26	91	33	78	43	119	-56	-36
418	50	-16	-45	38	-46	-15	-16	-10	-21	235	-4	-124	93	21	571	30	-14	-481	377	36	9	27	62	10	10	-96	15	-3	-272	-149	-9	59	20	97	-15	-18	-53	34	79	35	9	1857	79	-9	44	87	40	-14	-41
419	1159	891	817	1171	1070	800	752	807	805	592	849	914	465	817	2307	1063	922	3534	3106	875	678	875	813	735	793	4386	696	669	1963	1155	1668	1223	1088	754	622	1040	1315	908	990	1355	1146	1268	704	864	692	1011	867	997	843
420	111	191	168	175	388	180	173	136	165	359	318	227	136	210	-671	241	191	166	639	161	256	429	131	272	226	149	72	688	100	219	129	204	120	180	141	176	184	222	149	128	145	189	103	172	1125	465	118	253	122
421	-66	-7	356	-60	288	145	97	308	317	176	180	-2	29	218	-142	185	139	-703	406	36	125	-15	-72	192	173	134	293	142	-228	-118	-2	99	324	323	238	107	-92	456	66	188	190	217	45	124	269	248	201	454	107
422	2679	3318	3575	3762	1938	2285	2417	2004	3791	9237	1475	1147	4491	2187	2874	2034	3779	2964	3387	5227	7484	2026	3295	6880	4313	2645	1898	3659	3334	3838	2956	4695	2677	3090	1962	7178	2099	2863	5054	2780	1371	4827	1588	1674	3365	4984	3555	3389	1161
423	20	38	9	157	457	31	473	164	35	4658	76	44	66	65	661	254	1261	1197	439	251	63	90	-112	3095	138	197	125	303	-105	97	126	130	113	147	33	69	237	418	183	112	96	154	146	237	197	114	74	231	100
424	280	342	339	160	200	152	178	201	236	290	307	238	180	270	289	284	294	184	577	212	150	251	260	254	198	664	283	77	433	139	317	288	274	204	327	236	10	252	273	352	222	465	218	144	366	371	228	253	217
425	122	75	278	59	41	74	127	224	173	-23	21	55	54	141	-833	34	-47	680	740	42	103	50	77	72	104	126	93	198	117	11	73	114	-2	66	157	104	0	427	122	350	344	276	204	28	148	22	34	192	104
426	2202	3731	6661	2119	2243	3160	2198	2294	2675	4191	4180	3118	1830	4058	468	2635	2581	1586	3595	2256	7274	2914	3905	4424	5109	2290	1326	3847	2170	3195	1785	3609	1580	7012	2691	3142	4447	5189	1930	1443	1702	4476	2651	2968	3051	6882	3676	3851	1923
427	24	112	177	49	371	216	105	98	283	167	293	200	48	189	1634	197	348	1228	351	228	234	293	34	145	13	43	220	375	2	377	436	89	73	252	187	340	64	282	22	73	160	57	185	87	125	385	409	181	82
428	377	290	118	286	473	232	123	286	227	-8	193	268	103	-4	389	-276	142	1183	781	14	10	268	-57	-86	193	-492	193	190	469	352	-41	15	112	79	-78	82	149	-365	538	288	153	-19	109	157	235	323	244	107	28
429	373	707	1539	743	680	289	496	1187	1382	837	750	728	613	1204	62	759	282	-87	547	778	979	746	546	1623	1076	419	784	1171	1034	905	297	1294	323	1495	960	554	655	890	54	400	1310	531	691	1510	563	476	1384	764	778
430	409	806	1394	452	454	267	439	717	591	397	346	1259	868	848	355	203	584	126	464	429	1219	1020	407	595	323	444	303	393	468	332	244	432	223	579	279	352	294	364	260	460	414	501	371	272	324	439	323	327	362
431	366	729	645	844	1763	97	579	524	276	1005	677	729	434	488	2451	788	411	4962	2332	355	500	697	1256	849	438	2366	531	372	670	622	686	393	673	334	394	854	642	858	285	375	474	651	503	140	714	469	331	881	994
432	-100	-70	-42	40	300	-17	53	14	-44	-53	-65	-33	-36	-47	88	67	-66	-528	-20	-211	-120	-14	-92	-237	-37	-467	167	30	-223	-113	40	30	-79	-142	-17	-81	26	91	-125	-100	103	-62	99	69	-127	115	-77	10	-77
433	167	279	373	222	174	239	35	126	161	307	244	63	49	160	-582	133	83	1945	706	459	136	129	460	255	404	243	112	102	98	142	146	123	104	188	104	165	18	307	423	102	268	308	101	-39	328	444	116	67	73
434	-48	391	194	422	533	97	391	410	33	344	616	152	173	218	1164	25	431	439	556	375	36	195	445	577	437	-460	287	346	-142	231	438	412	478	619	419	514	232	434	220	195	496	378	261	42	284	278	219	392	551
435	153	107	280	-83	78	121	-1	95	144	256	263	308	219	172	-652	266	199	304	387	270	205	224	224	166	205	64	59	171	-356	20	-1	387	450	250	43	51	25	198	283	-12	111	160	77	161	151	335	215	97	129
436	964	1023	370	-122	223	438	-452	-119	1028	-27	710	920	270	249	-2558	556	858	-3542	-2220	335	741	640	796	-70	21	-1118	499	-365	1145	389	80	776	496	369	374	35	-33	734	2	-36	760	1276	781	519	264	-1583	424	823	852
437	917	1510	812	654	511	932	933	1171	897	510	500	829	386	822	740	1184	1051	2453	1496	627	709	586	539	254	410	2001	383	1175	1834	1177	1009	752	755	878	385	594	594	920	1994	1225	561	1412	575	715	608	1060	1036	403	471
438	1547	1776	773	186	364	821	282	491	1057	1117	1125	712	523	1188	902	571	387	-1322	-514	853	1131	1216	852	444	1027	207	929	1015	1009	1324	609	362	497	1076	1013	807	618	746	999	433	485	668	526	187	821	966	588	262	269
439	7199	7503	4665	1865	1785	6413	3789	4952	5896	4491	4212	3676	3439	3809	1167	2507	3484	9482	8636	4211	6097	3110	2545	3098	4453	3118	2773	6581	2187	4699	2032	3969	2649	3658	2489	2573	3093	5951	4146	2773	2993	4995	2671	1543	3265	2660	2680	2551	2292
440	111	184	127	-3	-24	60	83	133	83	101	83	31	-47	78	-689	161	-95	-532	337	3	98	35	102	165	65	-84	-11	105	279	157	-23	462	36	57	16	-19	171	26	25	33	60	-3	6	115	32	147	-49	5	-2
441	335	296	352	269	295	397	175	409	326	298	266	136	240	196	112	179	473	1992	385	194	370	82	473	315	413	1004	346	344	904	489	302	385	245	264	126	315	333	419	622	124	190	325	134	151	539	364	209	129	141
442	57	-45	161	-44	78	-24	89	24	78	-5	-64	49	9	36	30	-108	89	1779	603	51	-177	170	250	322	-173	138	257	7	-88	64	97	-39	26	3	-41	43	-59	208	-2	176	79	449	116	19	-45	-17	-120	88	89
443	-240	-143	-134	-20	247	-151	-124	-403	74	33	1	-40	125	-72	1661	37	-269	-647	-124	-34	-145	85	32	-120	-149	316	-111	-14	92	-127	11	-439	88	-80	40	-6	-140	9	-75	-71	-68	-22	26	-88	-56	-156	-27	-33	-106
444	500	181	183	221	341	183	50	-18	240	660	388	755	797	603	1501	342	941	468	139	1421	715	821	1129	493	155	654	701	8	463	246	480	281	737	905	325	1309	923	722	358	237	178	98	169	450	622	1939	1404	690	659
445	2171	2220	1642	2223	1527	1767	1143	1323	1295	1522	1150	1285	1282	1105	5599	2088	1311	4180	2135	956	1367	1889	856	1015	1326	1172	1349	1866	2699	1590	1753	2207	1191	566	752	1673	1329	1535	2872	1867	1594	1183	1545	1216	1851	1457	636	1677	1398
446	988	1055	2358	1990	1105	1452	1164	1063	1768	1349	1120	863	3918	2089	1772	3111	1444	239	-182	4721	3091	832	275	1438	3706	-685	1749	1283	3496	3743	3591	2714	4913	409	1898	1152	1534	2341	2992	861	1078	1749	1251	4358	1249	1187	1229	2241	2245
447	651	521	673	896	1236	501	757	684	550	487	560	798	666	953	1748	1106	1210	1484	1363	552	640	687	918	882	617	2981	642	869	966	320	1319	871	1510	939	797	756	747	1257	1790	953	1456	980	908	1667	679	1042	760	1761	1241
448	2763	3338	1668	1616	1676	3823	3174	1817	3596	1557	3077	4702	3616	3815	2476	1500	1704	2347	4622	3250	3942	5930	5259	3019	2157	1285	1428	1576	1320	2195	2324	2036	5009	6053	1658	3189	2433	2528	6429	2374	1989	3109	3088	1400	2806	2267	4255	3457	2711
449	-104	-126	119	-262	-238	179	102	32	181	-76	300	-88	119	92	-151	-56	-242	-914	-688	76	84	87	169	82	14	-523	74	37	55	-205	-91	105	89	290	204	-113	16	222	-340	-55	-33	-28	239	321	176	81	267	125	61
450	237	404	674	262	-126	560	639	380	343	1462	416	1358	269	509	1752	410	204	1908	685	365	470	1494	854	1152	421	287	120	880	250	301	161	537	477	1293	566	1086	451	68	197	274	428	1491	974	521	736	437	1294	623	601
451	182	178	209	238	38	440	149	209	255	698	362	145	215	249	-427	82	-11	1250	311	790	320	207	314	773	136	91	102	137	205	294	219	201	212	403	237	204	162	156	320	355	278	203	132	198	298	258	192	281	342
452	-200	168	-3	165	-44	106	-86	322	73	104	97	127	135	202	821	158	226	-201	368	212	130	74	181	212	60	-367	109	147	-57	88	139	109	151	189	58	128	51	182	141	124	47	224	381	266	127	147	187	523	344
453	2528	2007	2083	1779	981	2917	1655	1560	2677	909	1007	877	790	1438	2798	1151	1241	809	1693	1148	2063	847	3201	1026	909	1219	1310	1633	2003	1672	4238	1860	2202	2049	1420	1060	2063	2945	3120	3845	3966	2980	2787	3568	1537	1909	2967	2226	3121
454	800	839	912	779	610	614	743	736	1061	1749	1567	1170	1136	1511	1889	996	1495	2061	881	1512	1048	1538	1986	1795	1044	624	537	1599	1820	1131	2345	938	3409	2367	1137	1605	1913	1161	2461	4650	1062	923	1265	1157	1133	1892	875	1287	1050
455	216	539	415	450	212	405	239	6	622	149	48	291	253	503	2292	331	604	1602	-67	77	796	302	65	58	88	-337	371	516	466	290	359	750	196	143	162	266	-21	200	162	84	49	287	316	164	150	194	80	-116	85
456	454	600	575	533	432	281	793	967	405	752	458	442	583	734	943	819	612	-167	1390	732	663	596	500	538	631	827	215	433	1117	793	1029	1017	409	476	478	511	810	851	1336	581	971	1056	129	633	557	1063	550	369	464
457	-280	-334	-208	-135	-180	15	-274	-162	-118	-247	-32	-138	-244	-124	-1589	-263	-322	-2077	-1063	-77	-29	-248	-212	-95	-174	-2210	-129	-17	-555	-375	-340	-46	-142	123	-68	-221	-106	-46	-178	-117	-284	36	-69	-57	-244	-239	228	-41	-97
458	3131	2942	2203	1448	891	1280	1918	1867	3960	1053	1962	1123	1147	1405	1071	1295	985	-339	1725	1317	1413	1144	3723	1280	1348	303	1031	3310	2629	1098	2420	2289	2685	2857	1125	1623	1764	2028	2414	2817	2854	3029	1883	2054	4241	2297	3459	3177	1574
459	5193	1979	17011	9408	9483	3214	14007	9836	13369	5695	4530	18584	5272	2252	3290	5824	4791	8763	6828	3348	6119	11337	12713	7712	11697	5747	10271	13622	15898	6720	11969	7801	11541	17037	10520	3164	22305	15036	1427	9720	9099	4137	11853	19439	12283	11560	15324	8142	15372
460	78	164	33	233	-79	86	140	122	111	251	209	105	113	30	1581	214	518	267	122	52	96	299	286	161	86	65	151	149	543	197	192	112	-6	33	106	212	289	269	489	162	-10	-47	112	7	245	243	233	234	-22
461	-106	52	-57	-30	4	-59	-32	-71	-17	81	-12	-40	-50	-17	-426	-47	48	-270	70	-16	12	-60	94	-103	-53	-18	2	-93	-246	-97	-69	-137	-43	10	-11	-23	-59	-60	-17	49	-41	-122	-50	-5	-5	-13	19	28	-15
462	336	356	584	-42	377	396	130	436	449	239	500	507	630	884	514	343	257	1322	336	203	610	432	374	369	112	-185	93	329	254	114	173	196	19	197	112	117	50	294	395	-117	214	48	362	-59	466	278	21	118	128
463	75	207	220	381	266	56	217	368	128	184	197	320	114	375	-508	303	199	547	854	93	35	270	69	211	291	415	118	51	-384	13	-4	200	-50	86	63	62	64	88	76	3	49	360	28	134	143	134	53	43	72
464	37	19	36	57	-16	63	41	98	22	5	45	51	47	63	151	-86	-20	-1372	328	-8	62	5	49	22	133	-126	59	81	213	-28	77	-39	60	74	41	3	53	88	-100	3	8	31	55	-76	54	121	56	6	0
465	512	554	592	572	1025	562	194	-198	467	305	147	268	312	149	167	253	378	1501	1098	320	309	545	167	393	525	-922	35	757	1433	925	196	90	473	104	336	-39	356	346	520	-158	27	175	359	281	139	-177	255	201	-139
466	123	398	358	-362	267	126	79	46	-56	33	-24	-335	-188	-366	-911	-289	24	4610	1718	-64	-23	86	262	222	104	-351	-121	233	-218	-161	-132	-897	78	62	-274	665	-35	-12	-666	-244	-151	-93	-146	-45	-118	9	-48	-326	-188
467	5044	2980	3841	2130	3044	2474	4930	4159	4705	2077	3364	4295	1226	3700	4632	2886	2848	4093	3517	2259	3526	2485	1365	939	2042	1974	5892	1845	2217	1882	2922	2317	1619	1462	2882	2691	1447	3805	3794	8200	2766	4288	2198	2955	3465	2804	2456	3580	2308
468	1091	2647	1861	1270	1169	784	1534	1514	3465	1129	2400	1391	1309	2031	1297	1163	1559	906	333	1864	1269	1323	2226	717	1273	838	1954	1111	1499	1749	1471	2777	2449	1086	2528	1151	675	2916	3897	2548	1231	2548	1491	1860	1475	1283	3133	1446	1505
469	711	806	422	386	823	1329	483	740	390	301	594	974	647	672	2195	636	453	730	905	724	370	986	1326	150	640	391	721	1181	1238	769	498	558	1139	2944	1018	1598	734	634	911	596	1266	707	876	792	1169	1109	798	539	902
470	1872	828	1034	931	1075	774	528	1240	1313	601	3645	1042	508	1144	-769	765	1074	-647	-90	420	866	858	837	159	444	-919	1386	577	1760	787	1787	1068	1689	1048	1667	884	753	3209	2031	1146	1676	2160	1493	1625	1155	684	682	1825	1275
471	200	99	231	213	269	412	239	56	119	147	-17	60	160	121	110	7	272	-43	434	171	95	122	-202	259	35	-48	103	332	303	192	128	0	187	79	158	194	91	137	147	119	153	111	9	22	206	-121	123	126	61
472	65	-8	40	36	113	0	8	90	95	-12	91	43	21	25	-210	62	-15	459	166	47	6	27	172	11	41	40	138	124	337	105	88	56	22	27	-18	24	166	254	70	0	44	57	72	47	11	75	35	-5	151
473	-952	-429	-603	-664	-356	-509	-281	-295	-764	-285	114	-530	-251	-1043	1161	-833	-266	429	-698	-503	-129	-222	-495	-378	-548	564	-919	-630	-705	-664	-958	-699	-314	135	-72	-234	-316	-600	222	-488	-892	-905	-732	-126	-131	-495	-74	-426	-213
474	194	458	292	353	493	277	219	240	268	295	306	178	184	255	1172	347	386	202	28	222	264	73	350	351	211	565	375	278	508	324	244	322	75	232	223	316	330	493	648	199	395	148	299	217	261	314	145	220	198
475	-246	84	-193	-257	-266	-96	-353	-398	-145	-129	-144	-170	-120	-245	641	-279	-133	408	577	-96	-39	-238	-51	-271	-83	-1530	-199	298	-173	-307	-190	-332	80	-136	-156	264	-497	-139	-592	-206	-61	-134	-112	-69	-275	-164	-65	-113	-55
476	1025	1163	1252	802	1104	1448	1148	844	1646	1067	1045	1966	1329	1533	-253	1574	848	-1618	-615	1572	1876	1755	602	868	1055	332	1108	594	362	948	1384	1208	841	763	871	873	1319	703	993	819	978	883	989	799	1244	1129	882	747	830
477	57	117	505	232	30	233	101	81	803	176	474	267	413	-17	120	-129	-10	-582	-748	155	1411	277	-153	-15	90	-739	277	602	508	170	1229	108	299	210	159	638	257	214	920	392	245	301	158	85	-2	264	68	143	-25
478	2979	7503	852	1054	1594	2698	1566	2191	2965	1101	2111	1095	1911	1713	6147	2111	1477	561	-739	773	3102	2373	1255	1184	2889	641	1293	1685	2943	3389	975	230	434	1120	727	249	1490	1024	1978	2436	-42	715	896	611	2242	670	580	3513	177
479	209	283	312	396	369	161	155	402	298	302	133	336	277	234	712	192	329	1295	786	388	433	249	116	239	232	73	168	-225	-260	-354	187	-90	397	102	62	477	164	154	53	139	-123	102	6	104	185	-201	99	162	24
480	-38	-279	-154	113	-7	-80	68	-15	-78	-38	-29	32	-135	-15	-408	68	28	-1272	-30	52	83	-23	-160	-14	-160	209	178	-197	-290	-152	38	-2	-65	114	-7	-32	18	27	-107	23	23	106	95	84	87	178	86	-36	-51
481	-21	8	-58	-57	-19	-24	-37	-5	69	-15	-35	-13	-47	-24	-456	58	104	198	-436	-41	2	-108	89	61	-11	-100	-6	17	-163	-74	-27	24	-154	-66	33	-72	-72	-115	-464	-50	-34	-72	-46	-33	-36	-92	8	18	-11
482	353	268	294	97	373	212	55	201	270	155	369	161	11	116	-243	-93	8	-47	470	180	145	178	398	155	62	135	135	266	203	154	239	125	124	179	180	236	85	188	98	202	106	242	-15	164	449	418	210	27	-53
483	44	507	296	149	87	18	154	237	260	334	307	752	487	444	620	480	247	-1606	-1100	236	118	736	923	396	464	550	311	215	536	470	413	156	506	333	266	485	85	235	439	615	183	144	664	257	134	381	172	385	346
484	320	345	391	277	363	119	174	258	166	259	169	321	340	259	34	155	545	172	783	213	369	195	135	314	217	225	170	-127	-88	96	152	101	255	250	239	496	205	457	21	152	-82	44	-284	279	220	251	249	228	258
485	-225	-131	-107	16	-446	-41	-185	-226	-127	23	-143	-152	214	38	-923	-211	109	-2038	30	6	-183	-148	209	-155	-87	90	-63	-143	32	-49	-94	-220	129	-158	-31	-36	47	27	-411	1	68	37	-27	-145	-142	-132	-169	-179	8
486	-155	-85	-205	-270	174	-373	-92	118	34	42	59	234	-248	-109	81	145	16	433	571	-17	-124	-77	-296	-93	-389	325	316	-531	-854	-711	-171	181	65	-154	17	-403	-208	-6	-455	144	130	-98	-176	-53	75	136	-261	-5	314
487	-8	19	61	54	-125	1	71	24	35	50	21	20	61	27	270	61	101	387	525	65	-13	32	229	64	177	64	31	-23	98	65	5	-78	23	-9	36	20	-61	20	223	-122	25	37	7	11	41	101	0	74	21
488	164	704	207	895	273	314	317	407	514	402	597	388	228	684	-1025	495	186	782	302	624	447	325	1426	807	428	557	304	474	793	914	922	524	1066	2267	970	737	973	916	987	761	1805	426	2106	578	766	1661	905	1707	1304
489	-6	66	17	-84	8	-5	63	67	59	78	75	27	39	49	547	5	17	-644	-489	-17	6	176	4	87	116	-37	19	113	-83	-13	-47	-11	-96	58	11	2	46	-30	142	56	90	83	6	-10	11	96	67	80	146
490	173	267	141	271	216	298	89	155	158	237	452	102	253	132	-191	156	160	552	470	846	384	137	403	379	320	94	56	200	-42	354	464	210	541	455	773	463	393	388	352	282	256	247	307	133	467	917	343	269	425
491	1286	1048	821	770	1147	1092	813	1013	915	1103	615	805	1097	990	1029	1102	1114	-228	259	611	556	912	913	686	514	1030	711	643	1718	1480	875	905	608	491	464	941	854	1415	2043	1068	803	826	807	689	544	1050	553	1335	557
492	72	138	108	190	79	-42	286	409	200	207	227	413	953	507	45	182	414	1729	2376	437	308	78	529	324	58	210	34	205	-423	126	100	440	661	299	49	104	-64	77	-298	445	105	80	261	0	161	61	-8	177	390
493	138	566	1112	223	633	993	226	-59	463	483	351	916	274	835	1740	608	1900	697	0	958	815	663	1151	773	546	2188	359	682	212	1025	398	976	1533	574	629	661	255	819	723	262	433	37	59	505	1121	1088	483	1764	800
494	763	890	651	831	907	1155	682	514	709	2046	1060	1014	696	829	-69	855	2405	773	1313	981	1533	1464	1516	1770	1268	2340	695	401	1620	746	635	1667	1017	2010	895	1399	1142	835	2234	650	918	1063	1257	1120	2557	1866	1234	1201	822
495	341	439	299	499	580	281	291	653	446	946	630	318	385	419	448	346	504	108	557	730	550	506	1345	769	628	379	302	911	1753	840	892	495	1352	879	1247	1986	831	768	1209	1038	1156	1050	1321	1467	575	1154	999	344	736
496	849	579	816	454	463	888	1279	798	2652	905	2394	2178	667	820	1052	561	1410	897	1129	1264	2675	4684	1526	795	955	450	350	968	1005	380	1370	658	2133	2407	2801	1019	1442	1506	791	3437	3463	1223	2092	985	590	2898	3007	1268	1805
497	17	104	200	110	246	322	72	298	202	186	161	72	166	270	766	170	125	694	473	219	4	133	112	406	189	-31	32	296	221	109	131	130	59	268	57	46	157	156	22	-45	172	127	166	227	123	229	82	147	131
498	290	159	73	44	142	108	273	263	241	66	211	130	203	174	-30	295	100	1154	361	57	71	151	373	233	68	580	205	299	716	131	293	667	154	340	183	394	266	398	286	275	219	187	191	97	199	481	584	390	27
499	760	717	960	1261	634	536	667	1317	885	1196	908	1979	597	1623	-53	795	780	1301	740	357	1368	1394	377	1264	979	190	566	531	-165	790	587	1214	1198	1556	584	745	766	1266	1014	1858	555	858	1178	1280	410	306	576	1468	717
500	2910	4365	409	8763	2218	1808	6014	4442	6833	8234	6877	4759	10501	8210	2609	3906	6492	3674	2579	10519	7113	5428	8580	5041	10886	2010	6176	5793	2939	6856	9058	11239	14109	9013	10797	8802	14864	10060	8613	25685	7585	13940	10074	8370	9687	6895	11020	6289	6950
501	134	-241	-219	-223	-359	156	-161	-381	-321	-563	-125	349	-115	323	-398	-8	-630	138	485	-186	-183	-28	-243	-478	-604	1648	88	-53	-605	-105	-206	-416	11	10	-57	-471	-247	-283	-723	-474	-411	-144	-47	-145	-399	-424	-100	492	-93
502	66	13	-73	-136	-240	30	-27	85	23	-83	-85	-63	-2	-135	86	-128	-218	-367	-210	-11	-10	-52	3	-18	-158	-71	-25	109	17	24	-210	120	-31	-107	-76	-176	-96	-63	-428	-142	-24	-28	-18	-13	-166	-12	29	60	-59
503	82	-92	-47	-520	-60	93	20	-249	-104	-206	-254	156	112	-83	-719	8	46	-60	-93	-131	-143	79	7	-154	-50	1401	44	-110	471	216	-630	-296	184	-168	-234	-29	113	357	189	-226	-89	389	92	60	-96	-123	-131	34	128
504	987	534	521	55	414	837	490	423	462	642	1602	1307	470	959	-1583	95	654	-546	2422	1270	148	839	528	529	-75	582	393	-90	-12	667	-329	-93	1940	1808	758	864	87	568	-1081	281	443	354	246	114	572	346	357	1024	1814
505	892	1484	2368	1848	729	840	828	1265	1446	2617	2410	1246	2312	1385	788	785	923	955	1297	2253	2459	1591	2343	1811	2743	609	1924	781	1195	1856	1384	2791	2082	2378	1313	5999	1296	1610	5284	2437	1289	2011	1018	1871	1743	2732	1585	1834	1564
506	941	2594	1234	2045	819	667	1381	1424	951	901	1115	657	625	690	1175	1050	768	2041	994	491	1562	460	655	690	2228	661	992	1294	1643	1200	625	2654	993	2546	487	744	1427	1479	2399	992	1759	1428	2647	1127	662	799	2006	972	1612
507	-13	133	125	22	112	3	70	112	22	7	62	2	38	156	-621	-68	-32	133	-914	45	24	-53	35	103	-91	70	17	-45	-10	55	7	-15	221	97	95	79	-106	186	140	26	-38	57	140	171	-107	-73	101	110	64
508	113	139	83	-47	-209	-65	5	-7	104	31	148	-63	97	71	-936	-166	-111	334	150	147	114	97	-21	15	129	188	-47	107	40	132	3	12	11	143	47	23	-63	-49	69	-117	-67	153	-22	173	125	144	-23	88	7
509	519	587	480	434	298	732	184	346	716	570	466	448	377	398	1158	527	1003	1138	427	304	386	518	310	375	364	876	318	770	827	523	715	289	588	528	420	526	344	868	1146	286	352	497	362	281	284	1211	381	763	272
510	644	884	954	421	563	544	572	683	597	788	513	613	906	1043	335	931	427	611	84	636	2541	627	657	915	674	327	321	314	533	1056	548	416	614	182	207	694	317	721	745	252	268	687	231	59	596	552	416	487	320
511	1211	1416	1378	864	1108	848	707	945	1548	529	577	973	907	726	943	1051	818	-411	-379	521	694	565	3522	297	339	1928	685	524	-163	571	853	302	1540	690	529	476	531	1348	1090	543	1389	1204	608	756	976	1024	126	484	707
512	309	267	440	126	-64	320	179	199	245	258	-129	-17	219	188	553	-14	105	-614	213	218	325	87	167	147	135	248	202	262	418	376	3	157	407	443	242	907	181	263	293	123	221	531	463	89	248	202	231	85	210
513	-99	176	-38	32	15	154	32	197	40	118	131	74	-7	95	-510	108	38	-765	36	29	215	-49	24	148	43	-28	-29	142	59	16	79	-82	54	-25	62	22	-6	143	-215	33	-70	88	74	-116	230	16	-48	19	-14
514	12	190	343	4	-56	170	81	189	125	162	298	135	181	72	648	-4	-32	-454	-176	234	408	82	373	347	191	-29	97	226	587	252	126	234	157	156	244	341	131	137	69	223	128	176	23	130	401	380	301	50	34
515	45	25	13	-70	25	-31	-1	41	-27	-42	-78	-23	-74	-59	2	79	28	-752	72	-13	-33	-42	-75	-31	11	104	-8	24	-49	36	37	36	18	-18	-7	-150	-36	-78	61	-48	-51	11	88	-15	-34	17	-31	25	-3
516	123	1277	143	703	489	450	589	2680	835	545	685	655	716	548	331	385	185	-419	238	327	698	496	1325	350	83	92	371	1005	133	813	1431	2539	905	1235	1194	1986	2721	358	526	862	1052	2580	793	2540	122	376	2710	1168	1321
517	413	721	550	660	517	1013	423	522	620	610	840	901	972	678	26	592	288	-116	231	813	793	939	1290	874	584	-150	318	659	583	452	1711	701	1448	1643	757	831	1189	444	740	387	1405	578	811	1071	694	1060	1469	937	1947
518	1070	379	543	829	544	565	505	1037	613	387	179	174	462	372	-1006	139	350	1331	1759	459	545	131	632	12	331	-1363	547	355	944	313	889	815	730	459	412	778	717	375	505	1010	864	909	816	566	534	436	451	364	751
519	307	305	470	104	-44	632	272	234	358	519	423	415	208	157	-265	141	166	1201	-118	380	531	257	319	535	537	308	34	224	173	259	151	399	53	376	209	181	77	134	67	103	275	254	196	82	339	1272	212	241	194
520	63	170	115	102	120	81	68	49	178	176	97	74	356	82	456	200	47	288	779	339	148	30	216	201	215	282	139	84	130	70	100	135	148	94	14	85	43	105	228	-31	41	50	-9	2	45	142	132	82	63
521	4730	3323	4302	3694	2255	3016	3090	2120	4420	17437	6540	2380	8022	6938	2819	4414	2854	6075	8066	6545	2691	2965	2734	9190	4485	1874	2710	1440	3246	3224	2609	2871	1570	1821	2099	1916	1802	978	9314	1450	966	3647	1747	1876	6233	1485	2472	9584	2821
522	124	214	197	207	113	155	212	56	161	296	221	213	68	117	-104	165	328	355	488	175	264	271	61	264	193	277	185	3	187	226	107	174	166	198	83	160	182	119	347	37	163	199	98	103	151	245	87	207	122
523	-16	264	218	105	239	104	160	238	56	150	322	140	24	144	-100	153	-20	-294	330	142	171	116	71	401	293	-61	52	224	187	39	-66	18	183	490	153	282	94	114	326	39	109	469	114	37	171	158	185	230	127
524	64	33	170	496	139	73	355	256	132	314	133	45	213	94	797	336	-25	-788	71	28	12	95	299	178	312	-333	34	118	152	123	146	184	48	45	72	191	231	30	261	9	134	175	151	197	221	355	-8	-6	115
525	2087	1762	1889	1717	1322	1636	1858	2613	1978	2362	2491	1219	2370	2247	2528	1984	1299	1118	2893	2094	1883	2430	2481	1804	2465	3157	1395	2606	3588	2020	3509	3580	4016	3003	3147	2707	2898	2301	3560	5482	2468	2037	2770	2139	2780	3373	2140	1631	1594
526	5215	3569	3874	3852	3465	2801	3971	4256	3288	2161	2935	6703	8214	6313	4271	3672	4155	7347	7286	1316	2327	3570	2433	5700	1150	6304	2150	1914	3336	3972	4922	2615	5471	2302	1865	4725	3655	2653	11176	5321	1844	3633	1109	2705	1737	1709	2864	2411	2213
527	124	54	136	116	282	148	270	345	182	79	93	-16	85	118	1187	290	151	541	53	162	83	52	280	72	51	-407	13	139	227	132	90	98	33	89	68	49	241	385	217	159	61	-30	107	4	6	152	84	45	115
528	-57	-92	-88	-66	-392	-63	-195	-251	-118	-161	-143	-52	-30	-44	-730	-232	-307	249	-63	-56	-151	-17	-238	-160	-59	-199	-144	116	-452	-137	-205	-192	-110	-59	11	-289	-141	-391	-188	-161	-185	-139	-108	-73	-95	-76	-60	-10	-139
529	2210	257	501	-524	353	492	369	404	428	384	263	411	141	395	-188	-218	-61	-831	-532	731	1118	173	-9	656	952	432	2467	-144	-297	304	69	2751	6096	886	665	712	247	744	623	1379	302	769	75	280	6800	283	228	5085	108
530	381	1680	857	-110	531	346	-27	509	1219	205	589	1167	38	482	1144	-11	250	-130	-290	579	577	661	-14	548	164	-24	583	131	-363	-117	204	181	794	785	435	602	-160	232	-309	663	132	420	161	19	1172	141	145	1279	348
531	623	593	857	373	303	428	467	699	934	648	690	1726	888	514	-44	431	502	170	965	1048	901	1097	759	563	657	284	501	808	1021	526	651	1066	658	1767	1123	2341	725	863	851	789	932	612	240	523	794	1116	1084	790	811
532	663	800	370	965	1051	349	720	669	338	756	916	1131	709	1018	289	691	1139	-1630	883	441	257	705	647	508	382	404	967	594	746	474	692	-315	768	679	524	1334	474	1057	1402	681	741	473	591	578	603	411	594	1177	809
533	2096	1315	1967	758	532	1151	851	973	2179	883	1943	1432	955	1990	-265	758	1135	-842	1058	1524	1732	1450	2834	412	948	463	1612	1159	1762	1274	2207	1733	1916	2388	1336	3052	1094	2214	1533	3392	4044	3162	2223	1051	1279	1331	3669	1703	764
534	545	750	1022	1176	799	369	587	921	500	1578	1157	1158	1047	1109	131	726	664	1147	596	1287	1775	1537	2022	1225	1341	266	351	798	465	717	970	817	1245	1816	1094	2578	787	1059	832	1398	1282	1450	1379	900	1174	2034	1054	533	539
535	962	1997	510	1147	1448	886	558	860	517	1269	545	509	1427	2412	693	1145	808	9350	132	422	316	732	228	676	594	-684	896	671	1259	1030	917	680	491	590	426	613	789	510	1109	780	665	1057	827	401	257	1290	234	416	509
536	1479	1136	1430	833	1298	928	1836	844	1347	902	1618	839	1023	1167	-1182	960	328	185	676	1394	1334	384	1450	448	603	-1598	1298	1895	671	672	1606	1703	2073	843	1391	1271	1143	4831	3526	2035	1339	1917	1487	849	907	995	1659	1563	944
537	118	320	179	362	209	231	213	496	80	347	287	167	104	323	1006	319	521	366	191	211	263	266	295	501	390	343	180	294	372	289	142	146	90	311	104	315	328	133	325	69	348	198	92	-16	302	199	220	167	134
538	2579	5816	2707	4482	2209	1806	3402	2316	7475	1665	3498	4128	4897	3758	-703	1625	882	-2112	713	3276	2774	2851	5012	3699	2317	-196	4501	2674	4633	7016	2683	2021	1069	2646	1316	1861	7491	4048	2639	1102	3154	2812	3626	2336	2235	3289	3845	3998	2371
539	8219	10371	1149	2384	7546	4556	5234	2756	3885	920	864	1543	5298	19490	960	2499	361	-852	-227	216	6510	1740	578	1132	2653	3293	5616	947	1830	862	323	1594	813	196	24	240	401	1975	999	-158	543	454	752	275	1762	259	281	4414	230
540	667	1009	483	526	939	478	1464	995	410	1017	768	520	502	486	796	791	664	2783	1635	237	1166	892	555	669	340	858	463	168	1047	1064	1734	789	442	291	728	1006	536	752	1446	403	1072	658	568	363	414	891	550	368	536
541	94	57	149	18	251	42	23	-12	24	-4	47	60	65	22	923	167	-47	-57	309	-25	107	-53	64	71	18	22	65	108	128	21	2	136	-7	61	7	-60	61	89	-95	31	22	-73	42	-9	-22	152	146	3	45
542	76	1227	615	217	-377	863	-399	116	653	665	469	480	282	367	-1862	1108	-28	-4218	-2104	360	1125	199	1342	147	586	-673	-34	1081	456	754	463	1186	1444	1095	691	961	711	953	1502	871	874	798	971	66	788	1286	533	1247	1298
543	640	747	638	807	1054	521	383	1194	502	571	531	474	393	661	183	1068	845	1528	528	205	518	474	234	1133	593	694	404	387	212	622	279	705	383	452	395	378	374	319	18	460	186	208	328	415	431	302	219	500	449
544	346	28	215	108	210	717	498	142	310	160	945	643	142	182	1046	270	288	285	94	110	233	601	244	143	120	135	227	443	85	258	153	213	190	141	84	223	165	64	-52	237	104	143	269	195	537	255	102	131	73
545	85	-295	76	-929	-1186	91	-819	-501	162	-431	-68	-196	-380	-248	589	-221	146	-1208	-2657	457	18	181	-255	-596	-516	-3014	355	-754	-1020	-279	437	-339	-46	237	72	94	-437	321	-458	506	122	313	267	60	139	-177	-189	-4	-3
546	80	81	57	129	-99	115	136	138	139	94	78	144	82	89	-61	17	157	-782	-215	47	44	68	49	100	93	-313	159	36	9	96	75	108	108	57	29	33	223	159	50	194	67	31	124	76	78	70	81	54	53
547	304	343	574	296	461	426	165	562	834	512	320	494	90	391	207	612	116	-698	292	271	711	400	508	334	341	489	224	256	146	84	224	371	240	188	169	185	112	311	364	513	278	633	293	352	424	387	71	226	476
548	17	-62	-95	76	6	41	37	-11	-125	37	-52	-77	-195	-57	188	-1	-192	-872	-116	-116	-21	-20	-11	-61	-190	-325	-12	3	-190	-165	-223	-364	20	21	-85	-189	-89	-63	-152	-265	-29	-108	34	-7	-67	-174	108	-32	-60
549	415	133	708	164	309	310	336	199	460	383	735	397	567	518	629	66	161	1595	510	1298	670	447	79	523	291	85	262	160	-51	181	340	500	502	123	388	128	125	310	128	333	315	159	77	359	316	217	234	622	276
550	1638	2948	2913	2679	1709	3325	2235	1524	2170	2566	1915	3007	2412	2146	2014	1379	2061	2884	1686	2489	2205	2704	2683	1519	1896	635	2640	1687	2213	1834	2319	3009	2593	1056	2647	2880	2386	2325	2046	2365	1935	1353	1285	2440	1820	1963	3161	2558	3144
551	695	496	180	782	306	710	375	219	85	637	449	217	265	214	2835	485	155	1410	677	645	501	252	834	282	499	161	364	349	1095	493	225	507	277	362	204	458	288	383	653	218	383	494	649	413	633	626	337	475	257
552	118	42	240	142	308	70	304	309	90	331	242	-19	205	168	1861	278	381	1609	357	276	149	192	333	309	340	1466	79	124	277	109	86	174	186	204	177	138	224	278	277	91	365	7	200	242	319	312	280	173	228
553	81	51	100	69	250	95	105	62	64	-2	24	18	118	52	482	-29	314	380	73	62	18	51	104	-35	114	128	43	-18	175	48	83	121	87	43	34	90	45	77	-69	10	4	6	79	-5	91	85	43	27	95
554	1398	722	1480	375	864	1570	938	966	1723	1167	1678	891	785	1475	126	876	358	1750	1375	2918	1666	803	2536	1227	1648	569	706	1812	1731	650	1787	2153	1732	3420	2483	3929	2029	1188	1821	3118	1303	1372	2395	2419	3290	2246	1101	1716	2153
555	575	-105	674	315	312	471	132	174	477	565	404	172	745	832	1186	495	475	3935	3237	139	-55	587	1129	522	581	760	692	684	232	783	232	390	1052	680	647	1701	536	317	995	1491	604	399	742	852	495	420	744	805	1035
556	-90	104	70	-91	-53	160	187	4	0	68	-69	78	21	34	-485	-238	-30	3	-13	-31	-9	-105	27	12	-91	-120	1	133	-27	0	237	43	43	35	-71	50	-29	-132	-211	75	-61	-126	94	18	50	158	-41	12	-74
557	-498	-453	-263	-329	-627	-331	-307	-454	-219	-365	-281	-214	161	-240	-1091	-392	-365	-5413	-2907	-71	-51	-390	-231	-71	-373	-3742	-257	-473	-1088	-473	-868	-316	-128	-145	-349	-380	-100	-474	-851	-191	-727	-136	-17	-156	-249	-860	-523	-319	-178
558	603	232	369	340	871	144	521	13	250	357	997	523	438	327	2004	641	539	-438	-1074	473	212	797	283	211	437	-464	1426	-47	-644	123	1028	265	290	326	661	700	217	1239	-94	563	258	284	134	1426	311	423	556	1176	549
559	1537	861	2073	2409	1079	1223	1467	1414	2400	1439	1702	1459	1852	1557	270	955	1353	1162	2832	1974	2285	2241	2975	1230	1192	463	1111	1588	1087	617	1377	744	1147	1460	4149	2581	1017	1289	1680	2335	1349	1652	902	1259	1093	1518	1653	837	1014
560	-386	-613	-781	-510	-620	-326	-189	-844	-226	-896	-231	-339	-1116	-509	-1349	-717	-994	-1013	-534	-188	-659	-467	-638	-609	-640	-419	-216	-595	-1592	-905	-609	-967	-360	-576	-193	-601	-682	-176	-1731	-729	-689	-765	-1044	-421	-652	-375	-367	-220	-348
561	260	489	61	300	-229	-71	397	172	545	807	435	86	202	-112	-852	232	191	-4225	-3832	302	-67	562	192	-397	-335	-1037	-83	-21	-288	-89	931	919	126	-142	441	184	564	71	486	638	713	33	106	-42	312	241	-108	587	138
562	929	-219	12	212	-310	-74	643	293	117	174	87	106	-124	2	-1269	-25	-651	-2143	-982	226	439	274	174	-315	-70	-1095	246	-98	-327	-646	-93	151	421	313	167	-89	115	804	330	115	-120	609	331	149	858	196	-286	127	130
563	-1132	-769	-794	-1063	-677	-491	-935	-776	-520	-494	-512	-492	-478	-699	-2305	-580	-1256	-3464	-1961	-428	-497	-717	-102	-343	-560	-5025	-552	-644	-992	-1014	-822	-817	-519	-132	-222	-590	-710	-812	-749	-622	-427	-433	-440	-436	-242	-556	-344	-647	-379
564	10862	6053	36973	11906	26834	8368	40317	25497	28676	13668	10825	26043	5955	6882	6771	14235	11667	25783	21308	4527	14823	17219	17703	10790	32811	13253	20715	44987	15985	12025	21556	24531	8190	22744	24052	2445	27911	27804	1941	30339	39127	10063	34072	44135	15084	17430	28417	17356	34372
565	141	200	145	165	257	133	26	179	183	161	69	108	58	93	953	21	-101	820	720	25	75	91	15	356	175	111	150	152	560	77	77	363	7	305	131	194	48	149	288	31	194	74	146	42	176	242	162	198	145
566	59	11	73	80	40	68	18	601	44	76	32	30	7	40	-976	801	-29	-599	-674	30	51	18	123	65	71	-767	21	243	247	275	46	131	82	47	66	90	96	136	500	102	57	79	-100	-28	4	68	92	49	69
567	1795	1313	1387	1217	671	1141	993	1348	1871	1070	1064	901	721	840	1035	591	867	1116	705	957	1265	1032	1153	766	1086	830	1007	1150	1546	738	1534	1275	1589	898	752	1202	583	2064	1993	1146	1432	1501	1062	1381	1813	1200	1293	897	1272
568	11311	13819	10422	7355	10157	7867	7572	13697	6942	4178	6562	7536	5008	19033	6094	13561	9888	11462	14883	5493	6458	9466	3502	8975	6025	6908	13149	14568	4635	7037	18127	9917	5442	3912	5398	6698	4765	15882	18479	9803	7607	6269	10178	7139	10815	13953	7027	3627	4752
569	-175	-262	-13	-296	-249	-73	-21	-126	-112	-121	-54	-68	-169	-133	-651	-201	-67	-684	-723	-46	-117	-76	18	113	171	-872	-192	-139	-525	-65	-75	-264	-22	-78	-48	-26	-39	-209	-129	-173	-105	200	-84	54	-99	-273	9	-97	-2
570	-24	164	88	192	73	22	-2	117	92	88	102	28	11	22	96	128	50	935	196	68	73	56	135	108	85	3	69	18	174	23	8	61	40	39	3	77	52	8	31	6	42	22	33	3	40	138	43	94	22
571	-323	45	-116	-181	-113	-195	-112	-201	23	-12	-136	-86	-127	-223	-811	-271	-443	-1061	-1237	-207	29	-230	-379	-78	-207	-401	72	-201	-415	-341	-418	-235	-90	22	-188	-131	-23	-138	-525	-176	-136	-228	-113	-137	-64	-201	70	-43	-102
572	1292	1143	547	492	684	653	894	685	762	450	586	1124	924	1155	7	647	557	2306	1909	642	1058	1377	1059	956	713	908	651	890	1370	965	687	212	445	1048	1022	1720	732	696	871	1743	974	1007	656	627	1145	826	689	370	401
573	-32	-207	100	-266	216	18	-42	18	61	-75	4	-23	-31	-68	1056	-40	-150	1024	463	-60	-45	42	107	-73	-130	-712	-194	-13	-238	-83	-255	-146	11	2	-36	147	-215	119	42	7	-63	187	-39	78	221	-126	276	-80	-15
574	14	119	305	-17	384	340	27	104	271	17	119	146	193	116	6	-155	-210	-630	141	-51	271	393	-45	225	-11	-42	69	149	-124	29	262	108	139	326	-2	41	-53	-208	-290	77	26	102	164	64	36	57	49	-20	-70
575	-127	-59	696	284	759	446	489	980	996	601	452	1026	1595	934	-2064	64	321	937	2612	627	1124	607	402	463	309	-1459	-1	-154	-271	-283	-241	-736	886	677	310	284	-268	189	-22	-70	-21	708	352	-297	736	-460	154	102	167
576	342	415	544	780	1217	480	265	454	569	698	617	848	1087	802	1209	592	456	-184	-825	561	733	784	1628	402	482	232	1345	1106	420	300	863	217	2015	1425	857	727	811	1678	781	2137	827	1321	1157	951	954	564	486	2312	1389
577	631	180	220	435	373	145	-91	325	78	15	235	-20	-138	42	-1084	207	-99	-1865	-52	17	303	175	41	-215	-154	-200	107	688	143	511	207	542	33	28	172	129	236	-378	93	9	658	-185	-22	-259	38	-27	-20	53	381
578	-49	-48	-79	144	-94	-112	-787	-724	-139	277	-3	-289	128	-76	99	-82	-40	-5662	-2703	198	152	46	103	-395	-5	924	-171	-139	-186	-518	546	-182	146	-57	147	-165	-232	76	-459	-654	600	-36	-153	193	89	366	-148	-193	543
579	-32	141	-110	-164	13	178	-8	34	73	-66	-90	116	80	196	-2225	-422	-138	2474	-101	7	66	7	52	29	-34	507	175	194	10	77	180	158	217	-56	138	-219	104	132	454	34	163	4	-96	106	-295	-194	-81	191	67
580	31	77	83	-17	87	40	65	176	45	74	51	124	92	99	699	107	49	-282	377	-8	86	-81	142	248	245	127	10	104	272	100	24	202	31	28	97	49	103	92	296	134	42	-49	8	-142	-48	250	132	74	111
581	259	311	491	-128	350	273	172	16	416	-2	523	540	48	298	837	25	117	137	-99	-7	496	286	-42	-19	-29	-123	192	81	-699	-146	-123	-116	439	105	94	162	5	160	-532	297	34	449	72	47	1002	-86	-57	1048	95
582	1568	1371	2842	915	3187	2907	1162	1590	2936	2334	2736	1388	2781	4372	1662	2068	1032	1980	1387	3514	1427	944	540	1830	2081	1022	1212	2751	1972	3304	1958	2368	4144	168	2514	713	2098	1393	1846	2210	1549	1776	1348	1265	1875	1275	2104	2502	1905
583	-103	-13	-61	40	-228	-103	37	-11	-6	-130	-31	-22	-38	24	-700	-323	47	-1467	-418	-161	-100	-49	59	44	-117	-184	40	-104	-212	-208	31	22	147	36	25	-149	-12	140	-31	19	68	6	123	139	-93	-148	-36	-34	-137
584	191	359	284	471	305	351	663	718	231	485	494	134	186	132	-459	973	158	711	104	55	130	89	286	440	907	301	162	314	421	113	265	282	131	278	187	112	226	275	404	38	297	1357	548	336	314	543	494	260	909
585	102	-1	450	659	615	393	395	618	403	418	364	252	425	761	1123	413	-197	-1100	311	318	397	766	582	30	384	-262	465	252	508	383	399	-39	227	57	511	142	590	330	1406	879	550	632	265	110	498	135	212	640	262
586	-47	-19	94	158	111	366	131	116	77	50	25	12	-106	1	659	-32	-166	-410	21	193	102	-88	14	34	-10	-122	-30	257	488	246	-89	-60	156	43	-50	-103	31	16	2	73	-56	162	224	15	122	-11	-33	59	112
587	2215	3144	901	1659	3859	2206	1239	3311	6413	1568	1383	7115	1743	2860	13352	4243	3262	2924	378	1280	9598	4275	329	2222	869	3231	1029	888	1020	810	305	2259	462	213	476	389	887	3932	633	3090	1442	853	1047	1046	1761	1733	1016	623	946
588	225	375	251	426	151	167	520	453	314	51	140	50	75	293	-302	44	55	1017	1392	105	139	368	110	23	229	-2312	254	549	318	624	648	605	167	42	128	180	179	401	92	149	373	61	437	298	224	274	112	273	303
589	441	589	499	586	476	620	433	455	521	660	593	406	456	806	1033	612	376	2437	1224	949	526	401	452	695	592	548	279	403	735	543	505	479	191	478	445	410	220	660	719	462	732	548	536	419	345	544	321	318	426
590	299	1041	65	467	553	775	199	349	395	158	280	105	321	12	1648	190	60	-1332	190	315	696	214	767	779	525	201	184	710	872	479	297	936	610	472	199	543	643	426	512	234	291	675	343	241	665	353	300	291	441
591	966	1561	1163	1567	1165	740	810	1224	1230	1816	1240	774	825	1121	170	1111	1079	2995	1999	784	1728	1079	5461	1224	1926	1166	711	1999	1092	1435	1330	1115	1475	2765	1433	2115	1471	2033	1727	892	846	1017	1700	981	1164	1486	1207	1039	1445
592	203	398	344	511	551	276	412	395	566	496	449	369	582	538	373	413	777	924	401	582	460	400	686	369	398	273	421	391	648	454	477	524	598	388	456	660	518	494	1022	708	422	563	440	352	394	470	297	650	264
593	421	320	713	502	1487	485	234	14	243	82	543	92	144	340	-1220	721	693	4318	4023	664	287	540	-477	26	241	1919	635	298	287	1191	435	830	1511	154	710	355	193	1145	3195	733	517	655	598	1298	454	360	631	340	795
594	1010	494	348	403	24	268	371	284	796	-76	658	341	228	265	1169	-35	296	-759	-605	-61	171	168	1260	225	242	634	413	-49	1358	227	2360	1460	1418	1723	1532	174	403	892	1333	2384	3460	1492	376	1046	-123	212	1670	922	1197
595	-102	7	-23	124	-232	21	-25	3	81	-6	1	-41	129	-28	1103	-117	120	1123	-247	-64	42	18	267	16	70	-300	36	702	303	300	31	426	115	71	67	-59	157	69	182	57	348	-60	277	118	121	153	160	147	201
596	17	105	823	384	114	83	201	371	264	571	455	377	194	378	-16	207	174	459	140	1277	274	434	786	1021	736	106	46	433	20	528	333	336	318	1187	504	1018	379	481	405	648	234	983	737	474	623	928	977	381	250
597	284	339	351	437	-99	268	105	297	470	198	462	161	159	125	517	44	44	-959	289	983	1032	149	543	502	470	66	351	506	-22	389	327	280	321	389	605	700	256	702	692	287	391	197	796	471	371	690	520	187	378
598	-34	18	-37	8	-16	-3	33	60	-6	153	56	-11	57	-82	-173	-26	-31	-991	-847	-173	-1	-94	3	14	74	-215	3	111	-129	9	-107	-89	-58	-414	3	173	-12	127	-434	-7	-46	250	31	-58	143	55	126	-287	165
599	-30	117	231	-182	169	104	71	-6	105	4	75	265	56	267	-200	-109	-335	-111	200	199	183	124	85	212	104	15	69	387	-55	32	22	139	74	296	200	13	69	403	-68	5	221	73	212	341	58	181	653	428	144
600	1256	681	355	263	1004	166	257	567	238	50	343	1239	447	783	885	-24	439	-637	-690	380	651	822	160	254	290	85	1966	296	-76	82	330	9312	4388	475	313	876	397	176	576	504	230	411	351	163	3201	238	175	324	196
601	270	722	552	178	-124	208	101	367	414	353	495	627	385	424	-421	190	238	-1508	1036	330	388	460	-29	156	252	541	323	289	286	492	259	110	73	265	357	205	205	395	119	348	179	86	255	386	218	-201	328	171	88
602	-148	76	37	100	-266	12	-14	-195	24	-135	-29	41	-66	157	-1708	-226	-132	-2263	-1130	13	157	75	156	84	11	-1055	-167	-301	-25	6	237	-90	149	302	294	7	221	-190	318	261	243	280	217	62	158	109	275	-177	147
603	235	364	232	96	267	367	116	128	87	119	168	150	64	125	-119	36	31	-60	686	50	255	96	343	174	217	169	23	283	386	359	138	138	137	38	51	42	134	85	354	107	169	165	-17	110	102	344	100	91	5
604	413	196	303	243	98	358	232	379	370	92	282	343	356	293	-133	327	184	2359	763	296	179	303	458	268	105	287	155	257	826	318	223	247	94	376	267	606	291	359	362	145	267	246	118	6	105	273	456	133	274
605	327	309	371	445	387	383	224	341	322	802	619	477	213	301	-27	298	298	948	677	1132	874	680	677	489	795	296	150	1084	118	565	226	499	480	1038	486	848	415	410	311	494	336	462	385	172	288	740	455	240	422
606	443	615	555	320	563	441	391	320	425	485	632	572	664	374	1139	387	244	2430	624	954	773	548	678	431	521	337	224	654	440	681	328	323	521	481	502	1075	460	260	811	298	494	473	394	265	329	881	737	349	640
607	532	291	410	-54	-72	314	-52	-112	141	548	255	173	158	107	3108	384	-32	407	-227	539	688	440	211	21	-45	1049	469	152	957	602	292	-8	431	594	138	193	301	-294	580	130	268	548	32	268	594	309	132	-41	206
608	356	538	444	21	0	279	275	191	488	421	781	214	681	232	891	55	114	-1651	822	849	197	286	242	189	299	-360	490	361	1219	528	319	-189	260	225	587	227	293	938	1049	127	296	182	57	396	526	336	162	151	80
609	-38	2	143	-630	-243	133	27	98	414	-374	-23	-16	263	-128	289	-425	-423	1987	1244	-139	203	-103	-129	113	79	2992	-8	90	-899	70	-920	-321	-177	61	-68	190	-152	-533	-910	-382	-279	-378	-176	-348	-209	21	75	228	-112
610	61	-28	71	32	-266	58	-85	-45	63	-280	-85	-5	-82	-7	818	-165	-54	600	-178	-134	-137	-36	-396	46	-200	-969	43	-272	50	81	152	19	18	-124	-63	-179	-49	89	-155	31	-90	-66	-52	-29	-154	-92	17	-1	-30
611	558	123	431	301	486	375	533	512	42	412	379	360	422	605	-130	-19	273	2111	517	-20	83	517	461	-359	441	109	127	158	367	606	850	170	358	7	334	120	491	355	391	126	-51	275	109	86	428	-35	217	-107	161
612	134	164	88	43	-7	12	39	-24	86	9	25	28	-21	66	309	-117	135	736	677	12	52	8	190	176	120	277	-6	53	-145	129	1	115	96	-4	24	31	100	-54	-19	141	65	76	83	-103	77	279	12	14	-2
613	1703	2130	3355	1817	1285	2730	1683	1994	2275	2761	2485	2277	2759	1781	691	1515	555	1494	2487	3854	2705	2386	6621	2512	2369	1137	1491	1880	1557	2112	1903	2322	3195	2160	3738	3890	1346	1902	2620	2068	2328	1565	2659	2028	3494	6047	4044	2948	3672
614	819	615	505	790	2336	634	1334	2306	832	362	994	1061	664	823	920	178	647	-13779	10083	704	365	172	868	237	2755	163	824	-386	428	547	129	1359	601	425	1181	55	717	1386	738	1546	1174	1676	814	805	736	293	809	1317	1130
615	1334	795	581	260	371	1637	666	405	1211	956	733	813	1101	1065	2041	570	922	-574	-457	953	654	778	1521	1019	674	109	527	849	2032	670	1900	1253	1255	1356	2479	3635	1319	2155	1918	1024	2476	1465	671	1829	1004	1468	1998	1502	1334
616	394	400	234	297	510	405	198	276	231	340	194	243	339	253	1261	423	539	1565	357	249	233	343	404	281	316	2880	222	238	770	430	539	347	332	140	182	387	314	549	877	422	405	814	238	332	203	448	333	361	211
617	194	80	179	53	-45	127	107	63	380	71	116	122	127	187	-589	215	51	-1247	164	88	149	35	116	84	2	39	140	239	185	100	169	151	114	134	148	135	116	241	-49	184	132	267	20	108	56	196	219	406	135
618	2491	2073	5827	4137	3191	2058	3489	3112	4061	3923	2605	3776	1539	2886	-178	2473	2899	2300	4082	2573	5841	5080	2531	2080	2499	1147	1546	1219	1740	3844	2642	3261	2171	2221	2565	4966	1028	3754	2527	1354	3003	5517	2544	4771	2713	1980	1923	2715	1471
619	588	420	449	-137	474	342	650	344	689	216	689	1078	501	222	110	220	70	-333	539	65	887	1536	4919	600	547	71	16	1555	622	-33	187	332	659	1314	891	1374	957	1142	926	1097	301	247	729	540	818	1700	952	669	330
620	-153	-389	-335	-205	-425	-238	-139	-192	-211	-354	-261	-122	-109	-243	-1365	-311	-736	39	-775	-176	-281	-140	-371	-426	-434	-142	-238	-316	-695	-173	-446	-94	-165	-236	-303	-455	-304	-446	-166	-328	-320	-86	-253	-291	-269	-552	-276	-183	-87
621	192	173	273	264	435	184	143	205	57	310	167	123	141	106	129	442	326	1890	408	134	279	189	289	361	475	66	218	342	555	321	242	421	70	108	152	75	175	350	385	392	147	219	248	103	199	518	318	251	63
622	279	244	137	334	394	370	54	134	270	308	18	364	342	307	426	11	341	2212	967	62	124	344	381	320	170	438	441	199	609	612	504	316	438	101	191	397	264	626	224	426	455	374	18	326	205	547	129	201	195
623	62	165	94	89	94	60	208	-83	95	72	56	8	38	-60	-410	178	326	534	149	-19	-9	51	131	-79	179	104	37	-2	252	30	23	5	-89	-11	27	5	46	-21	-285	3	98	-24	145	34	102	20	-20	12	-94
624	1681	618	2891	390	561	1114	1338	1025	2308	677	1379	1222	1544	524	839	725	1790	-4233	-1243	2990	1674	910	814	633	822	-3578	1018	212	712	1504	924	579	375	727	851	2056	580	565	1155	141	608	246	399	919	1047	911	748	842	283
625	-41	176	60	29	305	73	31	124	90	57	0	17	82	45	691	61	227	1645	236	20	63	-65	20	83	91	-139	91	38	196	50	222	232	35	34	30	-18	35	72	90	-13	-103	143	-9	-29	197	67	24	12	-56
626	1715	1324	2651	1567	885	784	1811	1849	2566	2712	1859	1607	1007	1714	61	1689	1129	1144	2370	1384	1795	1528	2937	1912	3486	262	1347	997	978	1646	1605	2748	2001	4143	2081	1432	1880	2591	2045	1581	1022	3342	1631	1611	573	4113	3126	1832	2727
627	801	986	1021	796	479	638	960	905	634	1226	928	835	750	758	175	1195	649	1509	1410	770	950	798	3924	1400	864	730	577	824	1076	812	1063	944	1385	2041	658	1738	509	1019	1682	884	816	878	984	681	809	2082	1173	809	627
628	777	1684	1501	1732	286	517	842	910	1164	1155	2450	1050	1099	729	546	797	1729	-73	1908	1239	1658	887	1929	946	709	506	834	1126	1227	693	969	861	965	2296	713	866	876	1085	941	1149	946	1018	774	1689	213	693	2321	1337	926
629	1495	881	1155	904	562	965	1220	896	1356	1110	1282	1501	1310	2349	1148	1109	1094	-1099	61	1119	1334	1178	1219	819	962	180	777	531	909	914	1774	1236	2903	2520	1075	1530	1196	1683	1579	2440	1248	1865	1525	1243	1496	1436	1384	641	909
630	512	864	509	1362	1837	997	388	610	365	502	1148	141	1227	638	802	940	572	-922	812	1222	390	358	870	1496	422	441	610	462	864	1481	470	736	541	575	354	954	549	542	815	237	240	106	489	372	441	346	-11	1095	464
631	455	552	328	272	305	367	330	518	476	460	715	749	931	306	290	125	127	1145	873	570	1124	543	289	465	323	60	305	594	184	627	291	541	1105	488	608	552	347	344	515	530	630	902	306	166	84	595	180	427	343
632	2383	2351	1466	1039	335	2002	1168	1119	1873	828	3208	2009	1347	1750	1717	1376	895	1458	-1256	1532	1921	1604	2550	1016	1167	1019	751	1282	2858	2044	2976	1250	3519	2743	1561	2724	1078	1922	4363	1837	2323	1880	1559	871	1201	1799	1032	1124	1941
633	-34	-107	-107	38	498	16	123	85	27	-42	54	0	-23	0	-552	-33	76	3652	470	5	45	86	-244	-100	43	1205	179	-35	287	43	82	120	193	28	-65	-59	-10	372	-59	43	83	-173	-9	89	-22	116	48	8	48
634	-5	36	48	17	184	49	34	17	13	72	56	16	-53	-27	215	-8	-44	223	399	89	74	29	82	112	101	-3	-26	71	160	28	-3	11	99	110	43	50	50	-47	106	-11	48	29	31	15	58	59	49	86	18
635	91	-461	-380	-622	-990	-590	-145	-748	-236	-37	-137	-399	126	-629	-1542	68	-474	-6635	-3155	100	-139	-239	145	-791	-721	-5573	-382	-683	530	-422	-167	-1605	474	137	-208	-417	-477	338	-676	-241	-291	-316	-311	221	-421	-511	184	311	127
636	701	951	776	1273	1164	838	579	628	764	1174	1083	805	618	651	1875	1032	1229	2210	1121	624	935	836	1353	495	697	1960	729	1282	1293	1204	1585	794	1266	1249	793	1029	1237	1042	1933	1158	1215	1428	773	839	689	1212	1021	817	709
637	1568	1305	2113	1548	1909	2305	1000	904	1399	2269	1543	1566	2053	2712	768	1582	139	28	1724	3380	931	1709	989	1026	357	1307	1538	543	1359	3563	1291	640	2127	1417	712	2290	735	996	-182	1603	884	535	676	1224	901	1268	1341	1736	1566
638	1152	227	1360	1138	557	415	1086	1006	2692	824	784	1293	1247	1422	784	937	386	-779	156	703	1098	2458	1617	1198	1319	-1015	1273	1104	2491	1408	1131	1749	1442	1479	1542	828	1040	374	1040	2000	1340	687	1426	1256	624	1201	839	2220	1493
639	455	526	442	843	768	399	381	297	331	622	455	711	766	430	1140	661	257	2251	1088	512	906	892	1837	1020	459	417	121	688	445	419	555	523	751	1285	859	939	773	284	1039	613	627	497	519	371	389	1493	898	511	567
640	81	9	85	70	220	-80	104	362	-29	135	242	159	413	78	1038	354	134	-898	-872	91	46	145	381	160	240	1189	95	-6	199	77	53	98	267	51	28	325	172	10	68	-19	-76	149	8	24	68	183	87	-45	-9
641	703	670	1144	808	719	915	530	580	620	794	654	644	646	483	439	742	476	169	940	906	643	889	1041	675	426	1027	231	331	1066	384	815	618	693	307	258	925	519	666	1184	716	419	741	460	246	518	555	392	357	427
642	131	176	147	55	125	313	92	223	134	102	373	299	150	183	312	179	116	-129	406	231	331	324	118	307	140	213	52	231	451	205	242	283	185	459	333	159	176	99	-86	105	125	8	214	176	404	613	447	156	70
643	6375	6268	3609	8175	5447	5971	6582	7300	4863	7372	4590	2412	5215	5280	3901	5601	4421	8050	15974	5780	6799	4556	7578	7701	7679	2302	2990	6727	10309	9847	8726	7082	4837	7062	5682	9342	8209	4916	11772	4423	10410	5586	9764	5747	5141	13131	9146	5052	6235
644	302	287	549	364	370	567	364	358	448	504	366	694	789	412	899	270	254	723	234	997	699	765	562	511	312	365	256	259	317	372	271	709	249	251	337	585	291	305	456	431	349	383	200	544	166	580	296	596	406
645	1002	1142	532	594	535	780	767	770	884	429	725	854	638	576	526	547	488	-184	598	742	811	708	2480	1517	806	480	567	574	837	1103	1125	928	931	1887	531	1121	1184	587	1901	737	886	662	1142	832	813	1397	659	1011	649
646	340	419	476	429	251	549	224	337	240	535	362	192	328	230	-360	566	205	457	658	281	489	284	654	534	187	382	222	444	931	403	186	438	324	326	400	184	515	433	754	383	490	205	421	251	334	512	379	232	277
647	2299	2534	2697	2943	2936	2213	2855	2948	2865	3699	3603	2716	3029	2904	599	3637	2017	2786	5951	6587	3541	3148	5544	4790	3435	1961	1760	4067	1754	2754	4210	3011	5138	4304	2538	4376	3062	3427	4378	2348	2287	4108	4324	3492	3288	4987	5201	4093	3838
648	356	379	258	98	62	422	24	138	444	635	322	204	248	175	496	397	334	526	830	719	645	450	427	691	568	-191	53	433	827	438	-15	350	27	505	301	599	107	414	190	138	275	198	464	123	259	509	112	322	65
649	287	229	160	422	373	364	170	417	522	138	734	165	168	328	538	89	172	-678	1342	362	573	242	879	166	200	294	346	719	2613	422	501	394	919	807	323	1787	1311	520	1062	622	1994	853	1353	1775	390	605	1305	510	131
650	351	597	682	224	216	603	422	537	495	449	1114	589	604	593	-441	112	306	-128	136	206	1049	1752	726	836	474	62	229	1137	621	454	621	485	540	937	760	1421	1031	499	426	1041	640	637	642	405	633	1043	710	350	223
651	-95	-74	-50	-45	-39	-16	-7	-1	-2	-18	-56	-40	-30	-2	375	7	-137	230	150	-37	-19	-72	-40	-11	6	-162	-40	50	-184	-48	-30	-97	9	-31	-21	-123	-53	-59	179	-33	14	68	-47	-84	-64	31	-41	-19	-20
652	28	22	-40	-82	-222	13	0	147	84	112	28	-23	-31	-45	609	331	-49	404	91	21	23	34	80	-29	80	133	-106	172	-73	39	72	-5	98	39	159	47	41	229	43	115	36	418	-56	71	243	158	32	-51	24
653	61	142	145	238	561	356	325	468	444	188	207	360	340	174	-703	211	252	17	135	544	263	129	212	122	177	412	225	153	163	139	195	334	185	186	126	74	345	580	29	272	230	251	132	115	250	147	137	204	346
654	191	119	153	240	197	14	110	144	88	292	295	122	353	74	847	-15	97	148	237	362	225	221	342	293	197	669	155	196	381	257	177	141	181	166	180	438	362	165	251	108	93	75	54	94	227	247	246	55	40
655	-7	-16	8	43	21	-59	32	-27	-15	31	-6	48	46	-7	254	84	-40	27	369	-48	87	1	61	17	48	-93	16	55	-15	13	112	-5	42	47	7	1	31	45	45	7	21	99	-54	113	-22	-90	-26	46	74
656	-49	-47	-8	39	-133	19	5	30	-15	-78	-13	9	21	29	-1547	-32	20	147	-30	-9	32	-70	-122	-76	-43	-80	-41	-78	-49	-50	-15	-25	10	-10	-27	67	-13	41	-37	25	-35	27	-31	16	38	22	0	-51	-26
657	1119	1198	785	1820	1501	870	966	1265	1176	969	583	697	1600	1598	2463	2481	2073	1155	407	281	578	1060	1622	637	1904	871	1520	2364	2164	1386	1290	1530	282	385	475	526	1269	1664	2256	2421	712	1167	951	285	796	690	696	1621	360
658	425	612	341	651	525	254	581	480	503	303	710	349	147	568	451	273	545	409	1015	372	261	190	1250	779	663	553	571	584	1169	186	1044	368	1425	1092	1685	274	568	666	1258	1455	1324	1389	576	290	1012	1075	1190	872	522
659	2103	3532	1744	2202	1756	2263	2427	1808	4012	1980	4408	5324	2804	4610	3280	1480	2575	288	1610	2323	4455	5576	3266	3427	3172	2464	1788	2043	2171	1623	1822	2034	5351	4632	1910	2383	2176	2809	3595	2005	2936	4231	1948	1713	3496	891	1828	3506	1310
660	2978	1647	1061	1155	809	776	1170	1141	2048	728	801	1051	733	1129	2172	1096	1117	699	1341	783	1037	977	1298	583	709	627	1895	1123	2290	1507	1215	1514	1529	873	1057	962	863	1655	2605	1854	1020	1708	947	1102	1591	867	1127	1114	2182
661	225	253	394	71	137	209	370	395	277	162	446	258	245	264	489	286	161	167	281	257	279	243	296	188	312	472	352	216	94	166	251	621	298	238	409	89	187	422	330	298	124	166	235	218	442	498	206	336	206
662	-37	-36	-59	-117	-17	-81	-63	3	-45	-7	15	-21	-3	-42	56	-279	-122	-531	-404	-24	-7	-36	74	-5	-32	-164	-95	-206	-11	-112	-79	-63	-10	14	23	-84	-21	-121	3	-98	15	-22	-10	-161	-1	36	115	-40	-39
663	294	318	867	272	230	225	382	412	582	238	462	495	412	306	1221	540	137	292	-44	91	420	395	1168	349	390	379	214	826	538	218	381	412	706	413	345	373	464	626	623	244	231	886	440	333	698	683	498	380	634
664	-432	-560	-500	-498	220	-280	-362	-766	-487	-351	-309	-545	-377	-584	-5175	-540	-677	-10124	-6170	-294	-350	-253	-958	-1067	-451	1679	-323	-344	-994	-423	-721	-544	-49	-223	-694	-365	-369	-779	-953	-877	-402	-504	-252	-197	-407	-488	-467	-515	-345
665	54	109	76	18	31	-11	16	-19	123	63	581	90	632	-27	-107	74	-7	-650	-184	9	-9	-51	186	-42	61	14	-26	703	237	-3	87	65	867	1094	730	551	243	214	439	151	515	178	498	170	121	252	433	-57	79
666	685	1145	1345	668	678	1121	684	876	890	709	1323	1024	1048	1051	819	730	271	1429	966	1918	1571	1161	1052	1328	441	635	854	534	400	677	214	1050	787	877	579	732	445	663	747	347	418	775	714	56	2205	1047	708	749	475
667	-133	-90	-103	6	-16	-22	-225	-247	-218	-75	-80	-131	36	-61	-536	96	214	-14	-390	-59	-118	-49	-156	-189	-114	-247	23	-83	-263	-256	-242	-103	-101	-97	-64	-68	-243	-61	-43	-149	-131	29	37	-109	-11	-108	65	-46	10
668	242	2008	867	1017	782	970	1316	1063	521	971	1108	1058	986	626	1981	1146	921	3560	2716	202	628	979	928	728	1219	2548	1245	1208	2939	987	1454	446	1751	330	1003	809	1208	732	2770	670	570	1385	818	222	502	358	593	773	876
669	271	417	374	1836	410	92	762	1003	153	1530	1540	450	607	403	1375	988	600	3086	1042	403	411	309	192	992	2385	1136	197	1534	274	152	1121	364	1631	1805	1197	1327	994	588	439	228	89	799	362	403	430	1052	1219	165	917
670	1409	2149	556	379	545	894	1007	624	861	480	2826	4965	1025	528	1958	512	255	-479	365	955	1124	5143	3249	533	221	442	583	1461	547	552	1432	881	1758	1916	2136	586	430	163	814	1727	1249	406	1338	304	866	919	1309	1753	3300
671	1104	851	1169	1166	858	1590	929	1000	1014	722	1626	1924	1685	1306	687	791	535	-307	1063	1542	1881	1891	770	1245	1340	757	625	2500	2351	815	1543	431	1898	1398	3409	5929	1983	1592	1437	1204	1048	1116	1388	1240	1243	1619	1429	650	1039
672	3509	2536	4642	884	1719	3819	1229	2517	2700	3805	2363	4317	2519	3000	1438	3656	905	6625	6616	6030	2888	3560	1252	4618	2114	725	2819	1169	887	1438	2120	2993	1144	1259	739	954	791	357	1415	573	1134	965	1178	580	2372	1811	630	1959	1539
673	3482	2429	2463	1852	1740	2603	2989	2071	3236	2086	2516	2166	1301	2275	2137	2046	1269	4477	3593	2004	2043	1851	2907	2052	2887	2138	1823	1586	3024	1732	1907	3038	2685	3457	2803	2210	2943	2453	1634	2872	2014	2882	2062	3296	2092	2765	2761	2853	2745
674	-74	143	82	88	11	54	-64	109	-2	71	75	-49	138	404	-488	58	61	-1264	-893	77	22	20	60	140	145	-127	101	297	6	-34	76	69	86	200	182	79	212	69	-26	13	22	-4	68	125	396	229	96	14	77
675	-6	62	40	-92	-49	-63	-7	-44	36	-14	1	36	-11	-29	633	1	-25	558	-246	21	-29	-12	-103	-14	-30	-24	-4	44	-61	104	-41	40	70	-11	-22	-40	42	0	23	80	-8	-57	-24	-14	42	-15	-42	108	-17
676	1081	1215	1270	469	293	1239	671	560	1772	600	1081	567	467	870	-520	192	136	-1873	1166	1381	511	780	763	1367	612	33	337	570	-11	725	593	758	396	918	605	769	301	208	389	276	508	577	1438	451	544	319	331	508	441
677	2	48	50	-40	-2	-20	-53	30	89	-14	11	183	0	23	-515	-24	73	887	-55	44	31	111	-40	86	-29	-112	-11	2	-100	71	37	-36	44	65	73	27	42	25	4	77	69	119	108	-52	56	-101	29	54	-1
678	19	149	21	-64	-59	-49	98	-51	39	58	20	83	-2	81	-117	2	78	-600	-326	-6	52	-20	71	-76	124	198	84	12	-181	116	48	37	-16	-35	18	17	36	-118	87	-39	50	93	24	50	129	35	3	71	6
679	306	392	233	-80	-240	225	331	-36	207	-75	318	324	255	164	1306	-105	56	-1733	-1212	-22	-148	233	563	72	95	-1095	135	281	374	12	685	143	385	440	647	-28	365	402	23	1187	794	180	698	580	175	199	141	244	402
680	17548	12060	16473	13822	12731	8272	15164	13971	15992	11257	11769	9734	12744	14143	7252	14552	12712	8967	16912	13914	14100	9460	8399	9866	15507	6534	11751	11569	9934	13746	16489	14912	4932	8118	7877	7200	11617	18676	11600	7139	17815	17763	11491	17438	9932	13279	15484	14683	11409
681	100	72	133	178	104	192	74	153	90	191	178	35	45	-15	397	243	142	519	298	33	126	158	907	123	135	-28	89	257	566	243	114	242	62	69	54	213	222	430	273	67	146	220	17	199	198	266	187	17	-8
682	-1	-157	-3	-195	353	41	-48	-55	-26	-75	129	2	-156	-49	-496	-178	-21	407	-86	-41	-30	6	87	-93	84	-606	-1	-75	-334	-27	-59	-90	-56	0	181	-48	-104	-85	-22	-82	-46	-112	-74	-9	-60	-86	-9	32	-45
683	2574	5189	3069	3607	3466	2304	4604	4602	3101	4479	3878	5385	3427	2719	442	2802	3204	5625	6458	1670	4219	5583	4681	5642	3798	4891	3618	7692	2252	3083	3437	4339	6403	8708	5417	3963	5198	3288	2825	4635	4289	5444	4925	7296	2841	2101	5040	3246	3327
684	325	90	353	56	-14	254	133	446	265	362	493	364	330	124	-363	116	59	-1478	87	160	442	167	1301	341	301	-112	191	329	434	158	892	234	585	933	554	807	205	671	643	564	442	401	570	569	487	654	466	446	851
685	485	226	226	373	162	414	498	994	264	258	603	441	1485	355	1678	366	21	876	163	1945	482	481	1947	210	286	140	290	227	766	114	3249	995	27	805	21	2476	716	3853	1163	738	-2	5938	114	655	578	99	290	1027	26
686	13501	21422	20544	17343	10224	13220	10091	15177	18070	21909	15151	12282	23806	25589	7372	17553	13052	21020	17989	38141	24874	16751	31400	26919	30434	11216	17661	16481	35585	31545	28996	20469	20792	19870	27557	19382	22925	24820	79246	29969	35887	27717	21588	24249	54666	57905	40885	13087	22545
687	2765	3190	1631	2605	4749	1089	2152	2043	2002	2283	2114	2183	1961	1823	3476	1717	5169	5979	4499	3361	4548	2966	2228	3981	1635	2991	2059	1333	1242	2098	1511	1530	2450	1164	1843	811	1339	1563	1129	1971	1118	3136	2597	2215	1308	3058	2422	1983	1920
688	45	50	100	325	4	106	30	241	93	292	192	51	64	88	-181	62	287	710	465	106	101	78	204	181	149	204	45	114	29	26	70	187	247	315	267	420	75	368	284	121	98	113	86	98	221	34	60	188	189
689	610	312	746	361	1267	173	242	974	841	312	931	1485	1724	869	218	854	857	1023	1235	414	741	1345	729	791	46	-271	914	277	139	-77	584	614	1183	781	640	1299	736	571	1162	1262	267	397	153	455	2886	99	650	1342	492
690	-196	876	464	439	684	291	65	232	-597	174	1030	467	796	894	-680	842	192	1379	-2443	267	775	462	-7	284	758	-2460	-48	281	-454	505	14	-670	905	986	-133	1007	417	451	294	-48	-277	498	862	517	463	142	-70	470	763
691	1183	1084	1702	720	1041	1107	1035	1287	1261	1872	2461	1433	1252	2031	898	1253	1436	1621	1712	3188	2015	1417	1424	1776	1716	1098	948	1216	693	1411	1556	1463	1896	3283	1479	1958	658	1458	1622	1254	1324	1521	1706	951	1733	3656	1639	1730	1700
692	587	103	-128	117	-370	186	-219	-499	19	26	200	244	-161	91	-2243	-241	109	-2680	-1578	-135	-170	-157	-208	-308	-326	-1394	338	-134	-496	-253	17	73	365	381	75	-177	-105	-191	-589	-156	61	-147	51	50	156	300	-234	332	-104
693	201	102	-66	-53	-126	577	322	195	180	223	269	788	533	508	-1069	249	51	-1096	-120	59	236	496	296	147	-29	7	288	454	24	-25	431	85	435	639	317	852	240	690	913	175	432	325	400	248	184	560	302	24	341
694	208	82	33	234	134	12	46	122	82	132	40	50	12	221	-477	185	213	-247	122	163	122	125	42	10	-191	265	148	63	176	-2	112	118	-118	101	24	48	146	8	117	136	101	15	142	114	-1	63	92	138	210
695	75	258	73	364	-20	105	104	203	156	281	282	155	176	180	-1085	125	72	728	339	112	115	67	251	407	374	242	185	270	-59	227	158	221	264	555	391	512	91	230	63	108	260	299	209	235	123	710	820	167	434
696	711	863	997	870	462	771	392	726	902	689	813	598	760	775	1450	849	921	2630	1462	717	1017	932	1165	637	704	2081	694	735	1070	1203	973	957	687	967	674	1286	763	1133	1772	691	802	1349	465	415	701	807	607	605	576
697	785	778	708	280	258	761	525	492	366	506	426	829	313	439	430	557	525	591	138	224	408	537	462	210	342	570	484	798	802	501	445	451	824	1216	389	618	286	545	563	396	433	496	481	304	416	568	641	374	572
698	560	546	625	185	289	275	282	307	814	576	710	487	157	449	723	22	300	510	590	529	505	297	318	392	352	420	398	232	385	530	127	423	195	734	606	438	416	262	339	241	329	179	203	261	339	246	455	332	215
699	246	819	346	551	657	507	311	542	405	756	472	469	1726	583	365	214	552	3394	1190	728	1029	419	3904	403	725	883	266	721	1032	820	1116	554	1258	1801	867	943	1079	522	1185	1378	895	1322	758	1028	808	1795	1082	184	256
700	522	420	205	259	93	302	125	278	103	321	255	203	60	263	1198	103	107	1122	405	89	200	219	256	189	152	166	82	453	1020	643	427	377	197	338	180	318	313	9	817	274	451	195	322	56	325	447	441	4	102
701	2190	1332	1870	1382	687	1307	1172	1225	2240	1846	1321	1109	1356	1068	530	1213	139	1030	978	1527	1697	1653	5015	2057	1495	1099	580	1529	971	1132	1647	1521	2534	2062	1147	2086	1241	778	649	1340	1208	1038	1499	1027	2245	1785	1718	771	1473
702	27	172	106	176	-39	227	156	141	105	195	463	379	117	130	169	142	181	197	300	424	241	449	1348	276	82	-87	231	71	373	173	427	212	728	1048	1036	596	631	100	545	289	963	308	301	344	516	647	538	374	290
703	-114	-233	12	-195	-91	-33	-94	-123	-116	86	121	218	178	-156	-543	209	222	-637	-425	-47	189	627	202	-32	183	130	77	-196	-477	-343	-57	-183	-120	373	159	141	-77	-58	-200	-354	-303	-142	-3	-189	-142	328	31	11	105
704	1257	1078	1014	1244	1881	510	991	836	729	1013	752	1084	892	769	636	994	1429	1239	1678	361	769	886	773	867	635	1361	742	748	1443	544	1535	809	1675	1012	684	938	1483	1428	1401	957	1141	835	491	841	928	1279	1613	881	977
705	383	139	315	283	319	263	219	198	328	272	629	439	487	170	-771	36	139	-1360	431	677	214	719	1193	445	401	150	155	178	403	139	203	226	158	814	182	937	325	177	93	247	297	224	459	329	406	424	452	687	314
706	1	46	155	92	-121	153	57	326	112	287	154	239	114	102	-411	-169	-27	-261	-276	399	267	222	576	342	191	-148	109	216	182	95	238	413	375	959	625	712	159	5	426	741	579	189	660	228	153	396	269	89	137
707	3010	2552	1913	2630	1795	2219	1275	1649	2104	2324	1802	1799	1675	2250	4905	1897	2216	7117	6341	1438	1279	1814	1344	2007	1355	4481	1485	1624	4076	2111	3499	2915	1742	956	1362	3326	1774	2258	3979	2686	2366	1926	1775	1298	1586	2501	1311	1960	1155
708	241	563	365	205	7	491	294	199	812	328	425	277	233	230	898	-57	-49	648	63	472	709	306	793	638	227	-69	24	100	722	398	213	348	206	950	515	763	282	60	277	341	257	90	356	183	190	434	367	130	206
709	891	404	781	654	892	511	468	484	834	794	562	557	602	551	372	535	682	1339	835	1189	843	513	712	411	217	386	333	231	231	512	547	464	475	295	291	635	600	269	614	492	431	202	424	522	738	223	360	862	405
710	700	2312	2245	1595	869	1965	1068	1518	2762	2200	2567	1319	1869	2013	504	1153	891	-18	1492	2865	4233	2767	1541	2904	1888	767	815	1355	1365	2098	1420	1087	920	2004	1631	1134	1998	1102	1721	2268	985	1806	2038	2165	1473	2165	2352	900	984
711	270	262	432	766	484	196	336	465	838	802	501	403	514	296	1028	577	287	-1242	-588	808	1103	610	862	894	422	361	280	560	595	234	611	436	561	940	825	745	796	1098	487	475	941	827	802	635	216	548	812	411	617
712	250	191	264	166	14	146	491	558	262	188	357	133	244	232	1084	301	322	697	1099	185	349	243	82	340	117	-611	285	481	605	412	-217	696	270	205	391	309	279	843	198	362	307	325	31	628	284	446	238	310	69
713	172	167	154	356	125	359	197	128	490	258	380	368	391	259	387	258	221	392	1020	515	287	530	848	301	359	195	111	253	751	374	246	297	420	771	884	421	85	296	599	266	410	477	291	163	505	592	1130	459	99
714	221	333	495	235	225	389	139	245	386	389	359	28	392	378	-119	418	387	692	585	312	632	192	458	614	505	270	405	439	157	174	744	847	437	824	384	322	694	496	672	606	938	549	740	583	798	727	710	358	397
715	77	158	148	162	34	127	44	155	74	105	102	133	134	57	782	157	24	454	-70	82	203	126	584	169	165	122	20	472	340	-32	327	179	390	263	634	379	235	549	367	500	312	338	268	613	313	483	329	28	503
716	-210	-156	-194	-186	-417	-59	-87	-136	-46	23	-84	-108	-81	-162	-889	-49	-347	696	46	-80	-65	-134	-115	-76	-218	-770	-180	-77	-495	-233	-161	-261	19	-122	-95	17	-109	-222	-215	-229	-105	-155	-242	-231	34	0	2	-193	38
717	897	1142	1034	1058	393	307	719	993	1373	468	1007	975	843	1047	2052	994	623	568	-499	908	1270	1161	2349	586	616	1701	611	698	1463	755	1841	1078	1862	1373	741	1215	1054	1315	2586	1157	1640	1603	1242	1088	1158	1109	1401	1146	779
718	83	138	309	122	340	124	220	97	145	204	292	308	314	229	-1295	183	341	356	77	105	175	213	572	608	261	206	127	232	-268	109	209	428	313	335	181	117	148	147	411	230	157	379	131	294	239	371	174	287	184
719	1005	481	798	155	633	538	624	788	771	423	495	287	399	1449	-521	554	905	-1367	2156	509	633	308	141	430	184	2289	906	321	271	729	484	384	392	347	212	291	141	291	423	144	233	445	253	236	403	511	114	1076	500
720	416	628	494	364	269	332	127	328	352	282	451	199	236	159	1210	496	-101	890	406	216	345	272	590	285	226	675	114	345	770	379	313	409	261	160	62	296	315	201	938	315	289	549	345	147	324	539	325	144	158
721	289	166	65	131	483	56	72	141	72	-80	59	-27	132	95	-889	44	215	58	688	-56	33	-24	94	-20	15	-544	67	154	195	-6	189	35	-173	127	38	-130	19	102	102	138	24	56	46	44	1	-89	15	84	-4
722	40	120	400	199	-97	207	57	131	277	-92	111	208	22	2	195	20	-389	-1933	-201	384	351	151	1	154	-107	-280	483	159	-33	-137	-85	-27	-37	20	-65	35	-28	277	-9	-2	164	2	-82	395	55	-2	161	-93	17
723	175	331	230	267	300	215	34	254	234	133	37	55	14	158	-361	164	219	1110	653	101	197	100	298	93	218	-78	-17	168	504	202	13	123	134	33	110	86	97	254	139	220	164	110	43	-16	111	308	61	94	51
724	205	54	62	70	51	358	136	-3	266	8	147	158	328	238	1242	116	89	558	350	299	247	-56	264	291	84	97	246	80	274	180	975	79	1103	147	511	465	79	646	5212	104	194	267	76	53	351	640	225	59	390
725	356	57	-149	7	472	-456	110	14	83	4	26	-17	1	-71	-668	378	-95	939	278	118	32	-135	-246	-78	-105	763	132	3	298	-149	99	8	-194	25	-118	33	139	72	202	-18	254	296	251	106	90	16	81	-36	-92
726	26	-96	60	49	-48	31	-1	73	46	35	27	86	67	-14	422	62	187	972	269	86	235	58	65	24	63	219	174	12	7	91	86	93	15	42	41	44	103	73	60	10	-30	25	-13	64	53	92	70	47	74
727	2576	4675	2458	3324	2184	3038	2562	3887	2398	1131	2504	2868	4769	3054	-377	2198	1347	-538	1459	3087	3376	2784	2848	1742	1352	1339	3273	5868	1319	2470	3466	4029	2095	1942	3160	4742	3046	2110	7505	3639	2322	1461	1756	911	2257	3199	4166	4546	2678
728	514	724	659	421	226	1023	454	566	942	1027	1140	940	909	476	1096	223	145	-1045	275	891	963	920	933	336	698	-24	518	516	901	979	454	1053	600	560	873	828	533	457	672	559	250	1065	202	282	729	526	1613	489	190
729	3	77	19	74	187	70	92	35	-22	79	10	336	-8	24	260	140	69	1215	156	97	63	211	37	66	95	-170	21	-15	-7	-24	24	-36	58	25	318	68	-13	-22	24	71	-40	-72	-111	28	-25	-85	40	-6	10
730	565	606	482	389	669	824	480	591	1170	616	710	362	2630	312	1006	830	440	3499	1857	249	1439	320	607	289	366	1434	758	526	1316	575	622	721	340	206	236	2066	423	464	818	316	440	222	301	113	458	518	364	78	390
731	329	909	657	856	519	820	250	517	520	1452	997	565	1098	626	172	692	261	-460	479	1516	1134	763	3474	2016	1061	336	357	641	843	1003	434	933	1206	1411	832	1318	492	327	833	518	622	349	712	673	897	1453	654	918	749
732	2030	1502	1591	4042	2998	2202	5586	4898	1680	2985	4753	1651	2658	1567	5776	4889	4392	-2424	-4803	1691	937	1183	1884	2395	3043	2995	3060	1729	2111	1546	1929	3420	6676	2712	3303	3282	3567	3051	5463	2152	3261	8952	1706	5623	2800	2152	3868	3082	9931
733	-843	-1189	-754	-1456	-1459	-1086	-848	-1351	-560	-943	-660	-792	-759	-802	-3916	-1002	-937	-7325	-5192	-580	-588	-448	-991	-717	-394	-9878	-896	-602	-2852	-1532	-1893	-1364	-846	-457	-533	-1116	-1179	-1079	-1855	-1199	-2176	-748	-571	-649	-685	-863	-738	-628	-702
734	306	354	360	565	228	400	298	257	342	448	246	239	225	393	-65	411	276	-51	30	392	241	285	582	345	351	291	168	485	494	346	400	395	247	380	308	560	520	327	307	334	553	404	288	360	254	544	275	300	308
735	1074	740	815	1505	624	471	971	621	690	1291	999	1391	1959	966	1063	1001	1952	812	478	688	1182	1217	1347	1252	716	682	1380	642	867	1056	487	920	1181	606	1195	994	1593	670	916	1588	627	792	627	1276	1457	654	586	1379	690
736	171	202	270	141	159	227	272	356	102	219	143	84	144	94	400	273	104	1611	596	89	89	62	121	225	226	304	100	203	155	166	133	93	392	165	118	237	88	118	4	146	66	121	105	84	76	329	272	44	275
737	1113	946	1087	680	1432	1425	269	360	558	881	813	414	551	684	3851	928	1393	1794	2023	620	593	967	417	763	840	2660	740	695	1877	1249	968	669	567	686	635	784	749	785	1355	655	374	858	592	1544	967	1367	359	719	540
738	192	235	92	145	-108	92	82	154	59	113	122	121	56	83	-106	227	72	-1254	-84	96	149	115	343	178	212	77	78	317	343	223	104	385	184	132	105	191	220	144	-10	170	156	149	98	202	147	313	297	87	137
739	128	87	76	245	414	0	75	99	42	230	161	141	142	29	689	124	505	1924	506	92	191	113	270	272	120	394	136	113	27	154	251	90	1	182	56	224	170	202	294	209	106	42	115	235	111	74	96	149	106
740	-220	-177	-85	-257	-111	-100	67	-227	-113	-145	-127	-77	-67	-43	98	-106	186	-119	-134	-9	-39	-89	-384	-133	-46	592	-158	-116	-239	-184	-219	-151	-14	-81	-27	-189	-109	-122	-131	-105	-91	-64	55	48	-136	-352	-191	-198	-5
741	67	216	74	276	173	183	56	61	44	77	-7	20	-62	-16	-387	-186	-69	-838	153	70	-180	49	257	-13	-17	434	0	272	530	114	135	117	113	-64	8	147	103	136	-220	153	269	-114	13	-6	-2	-106	83	54	77
742	73	34	32	76	154	114	100	72	116	177	172	89	27	31	-809	84	-54	-549	126	207	128	130	119	248	112	110	67	56	175	80	-5	93	125	121	119	227	97	50	-104	30	47	-1	54	-27	96	123	-17	48	44
743	76	355	286	290	469	246	338	241	377	294	73	420	367	274	955	135	297	986	574	249	18	193	95	315	308	361	209	293	651	410	530	279	310	131	159	280	88	198	607	588	197	484	307	388	35	-16	149	357	400
744	121	1395	563	3832	1122	435	2418	2016	1090	3802	2706	774	937	1685	817	2311	2023	-2016	389	256	551	935	1569	2454	2640	1642	2073	1108	365	320	551	2163	2823	1925	1735	2611	2516	1739	1227	2586	1780	3411	2168	1287	484	1466	1797	1375	1912
745	93	-66	68	-57	-80	101	-51	104	128	125	46	129	18	62	-73	-99	-75	-45	-539	-43	58	160	-10	140	33	-30	4	222	114	243	-80	146	55	63	15	186	-53	18	-168	-69	8	82	35	0	33	23	106	-41	70
746	109	95	84	201	50	10	-2	97	110	427	265	210	280	202	590	44	62	-1060	439	12	75	248	836	451	366	54	94	21	321	81	141	119	193	470	369	732	122	215	359	411	468	127	177	168	163	563	222	152	211
747	135	463	854	651	106	-73	353	322	373	323	703	2097	1876	560	14	357	207	-76	-287	1265	1553	2676	677	1400	650	863	-67	972	-92	229	40	247	183	1977	1502	2281	39	-177	-110	502	379	1031	128	280	593	2178	71	1155	419
748	967	615	872	685	692	601	390	606	688	1036	794	483	361	853	-710	788	753	-603	610	1770	1106	706	878	955	557	1740	674	596	1212	939	813	919	1016	1107	607	1430	453	953	1019	461	818	807	452	588	742	933	626	515	383
749	1923	2328	1985	1894	2140	796	1892	2522	1713	2091	2184	2433	1163	2413	4413	2665	2326	5081	2464	1123	1948	1299	1526	765	1916	2098	2731	1325	4305	1329	2099	1833	1792	1209	996	954	1455	2432	4945	1689	1731	2465	1701	1297	1497	1528	1617	2042	1042
750	488	955	656	-99	7	546	631	-140	393	156	523	743	265	227	-628	551	387	-769	-61	518	482	329	358	138	260	450	-37	364	593	549	406	416	140	328	129	-93	270	529	139	496	909	813	532	549	75	276	477	527	480
751	16	-81	66	46	11	125	34	32	63	6	77	76	70	52	809	-94	51	-575	644	94	72	69	48	49	-53	-3	-32	88	76	-31	81	54	198	277	75	342	79	80	-45	4	48	98	71	105	46	149	265	109	65
752	-5	210	547	8	399	602	137	-34	793	411	453	333	423	1015	-63	526	635	-1683	-447	691	833	183	841	138	250	-955	531	83	-39	62	-78	-739	1364	538	453	1758	17	1279	1148	983	227	852	566	458	72	223	101	413	382
753	894	442	528	778	982	400	383	223	217	344	905	612	1120	1012	2692	1065	669	1310	1017	915	600	434	688	412	282	-296	742	258	667	468	1279	597	1439	575	890	1670	588	1366	2103	1271	901	788	538	408	213	1509	445	964	1170
754	330	52	287	-212	195	155	140	-196	262	-70	189	112	50	369	1099	600	292	-2191	-700	286	-48	-156	-303	-464	-220	143	291	310	184	-106	306	-249	34	39	103	144	310	411	685	454	210	262	208	48	326	-338	-93	292	70
755	792	726	655	1217	530	580	597	703	836	1215	1182	1142	799	1641	900	620	178	2735	426	1025	956	920	1078	604	970	434	973	463	802	1090	950	529	1321	1180	791	1306	1142	682	1626	563	1145	702	357	494	1016	1350	961	663	686
756	-271	-318	-250	55	-126	588	110	176	-147	1	-171	-46	-39	-227	-112	4	-30	-2351	-1031	4	-152	6	25	-17	-133	95	56	-31	313	-257	-118	-434	-60	22	-20	-128	22	-137	-469	-77	555	69	17	-143	-84	-54	-10	-96	91
757	376	751	491	139	90	798	414	260	870	760	547	163	634	1439	1462	772	541	655	-164	1156	661	460	634	833	701	497	123	650	519	561	201	562	80	539	296	96	298	60	230	-185	25	2084	587	134	570	703	733	66	236
758	136	322	635	125	194	341	302	26	300	270	198	454	284	330	-534	185	278	215	-245	333	204	264	174	5	86	-428	256	362	-73	118	132	195	244	96	71	99	116	422	259	183	103	724	22	299	193	296	28	134	158
759	100	47	164	292	461	300	123	216	177	19	203	355	537	42	714	19	416	-1654	392	175	231	848	352	282	283	67	404	641	-284	-35	526	14	214	188	175	248	511	5820	1455	-21	2644	1041	142	114	739	191	440	190	204
760	-13	-104	-18	-87	-105	-130	-30	5	1	-79	2	19	-67	-6	-15	47	28	748	551	20	-16	-28	60	-21	95	53	88	295	62	97	-86	222	-124	-21	105	-24	68	106	140	87	233	-102	170	-60	-28	189	132	-146	114
761	1080	1550	3105	2131	753	3172	615	1840	2773	3214	2032	1665	2071	1685	736	1645	1042	2324	965	6879	3586	1597	2311	3456	2646	785	1042	1631	1073	3853	1735	2272	2575	2823	1213	2035	1064	1103	4150	2215	1292	1634	1300	862	1134	4593	886	2388	3713
762	319	65	302	86	853	82	150	87	273	549	283	404	168	308	354	-101	381	251	613	119	299	498	888	377	409	-395	209	460	1043	374	-40	450	423	455	416	455	343	37	1034	188	323	237	305	213	169	175	352	447	231
763	199	136	215	2	553	175	-44	-226	361	-316	270	-117	-88	-153	-116	-101	28	-1105	-907	432	276	-15	-248	-16	120	1220	-87	380	220	-30	-1723	-815	97	286	-218	259	-212	119	369	-300	-532	58	-265	161	508	-585	18	-700	-469
764	-227	211	-3	85	221	-42	143	151	-22	-40	27	122	-118	-81	151	329	-48	-494	425	47	41	13	-281	-46	-339	-47	33	235	222	162	-22	72	165	100	35	54	-86	-89	92	-56	177	189	-118	-15	41	86	29	-46	27
765	211	329	489	576	-52	594	315	42	702	801	655	538	99	521	1169	-283	383	783	429	872	1025	703	465	-90	472	-306	265	320	291	236	389	520	921	649	189	627	422	388	425	688	480	320	406	557	451	1048	742	635	351
766	1039	704	364	901	407	1162	1021	611	948	437	1002	1018	597	1039	1598	343	518	-25	1407	693	1077	943	1471	516	623	605	815	645	1151	569	1496	2319	1315	1271	990	2459	1267	1457	1841	1356	759	1201	1135	1571	815	982	1119	1439	741
767	931	-106	11	-203	-64	114	285	72	458	168	205	651	-154	401	-111	110	172	-40	396	528	70	488	150	39	-121	-199	682	-63	-474	11	522	20	215	274	723	-293	98	461	-260	95	-56	14	-32	254	625	491	432	455	824
768	119	146	275	466	121	185	178	167	136	235	120	294	6	125	-267	102	101	121	163	505	109	275	130	386	162	590	31	87	-32	140	54	144	43	94	47	815	191	145	281	76	56	129	162	89	191	60	75	51	88
769	607	550	466	526	505	306	523	257	438	602	466	264	165	447	1471	438	612	794	815	459	549	408	386	357	310	617	489	573	676	536	470	588	532	308	214	608	528	896	969	317	492	347	478	553	370	695	413	463	289
770	110	150	146	-36	133	86	173	141	103	96	69	78	145	71	124	143	146	-773	54	88	87	87	196	83	136	112	115	79	234	100	134	100	96	60	26	130	146	392	28	215	98	169	77	37	143	180	75	69	46
771	14	345	169	-45	339	351	-77	70	180	169	863	571	669	256	-1123	-341	-156	728	101	698	331	678	765	264	353	-403	275	416	-615	105	234	263	1184	716	664	284	166	9	365	-47	214	295	399	-57	245	146	212	304	185
772	43	-42	-45	-185	-60	7	-186	-77	-33	-31	26	25	105	-68	-131	-172	1	-90	370	-103	-61	-14	-14	3	156	-277	-91	32	-202	90	-124	10	-158	23	-2	-96	-98	157	-194	-67	2	-10	-31	-123	-28	106	-11	81	-47
773	-81	-169	-190	28	-330	-159	49	85	-250	6	-1	201	125	-38	-631	43	114	-703	-385	134	146	84	0	84	149	-1991	101	-225	-570	-215	-15	-166	191	17	199	55	37	320	248	215	81	157	115	219	-37	-247	125	33	264
774	1649	2069	1648	1985	1952	1995	1873	2070	3756	2001	2184	2566	2877	2832	3934	1646	1763	425	1248	98	2035	2784	3142	1265	1362	303	1342	5631	3323	3100	1816	3962	3949	1480	2610	1193	2115	3405	1993	3309	2585	2702	2264	2246	1963	1580	2717	1287	1176
775	350	458	600	496	515	419	312	663	563	225	425	405	519	696	104	684	232	-867	399	410	317	291	353	105	314	-769	572	213	132	110	702	350	278	147	524	275	244	512	945	547	286	301	353	406	559	446	404	439	354
776	734	810	507	773	768	586	511	738	560	736	699	449	335	445	617	499	817	552	482	630	514	692	389	631	1075	2797	527	551	1042	414	796	311	439	595	422	799	538	826	1011	286	458	1055	335	611	655	984	555	567	367
777	1505	1045	1983	2147	1245	847	1581	2612	3678	2727	2705	1351	4061	3672	727	1190	982	1514	2559	5889	1532	1807	3392	2639	2236	4959	2104	379	-67	949	2810	2429	1337	2170	1375	2672	1069	1693	2454	1422	1702	2627	1440	1799	2033	1650	2663	2078	1436
778	-13	-15	-84	-123	-283	-173	-2	-74	-19	-54	-63	-144	-100	-2	438	-10	-218	920	-505	-62	-16	32	-214	-150	30	-591	-260	50	-209	10	-169	-8	-63	32	-21	-39	-165	-196	-341	-71	-117	98	-13	-97	-104	-395	-161	-93	-161
779	1433	2032	1779	667	1612	1058	792	1036	693	943	1677	784	545	1612	2547	1207	597	4644	3999	782	1104	881	560	772	807	5515	1591	1017	3217	1278	476	1478	343	670	316	616	492	1926	2185	1144	778	873	1049	1016	532	778	790	199	739
780	-481	-305	-125	-561	-195	-266	-120	-452	185	4	-505	-236	-46	-316	719	-231	327	870	-267	-19	-151	-184	-519	-95	-161	1391	-255	-449	-960	-644	-371	-727	-122	630	-41	-119	-634	-825	250	-97	-204	-326	-209	-181	-393	-798	51	101	56
781	-12	1009	871	-658	555	1009	-522	-408	457	167	100	-114	226	-144	445	5	-281	5406	4088	167	-137	295	1328	441	-420	-288	-130	986	873	1402	-232	430	135	43	379	242	-192	-1	-147	-259	510	-74	-141	412	138	-336	341	-34	-92
782	-124	-70	102	-355	-720	10	-190	-125	75	-120	-123	-88	-212	62	137	33	-245	-186	-110	39	-75	-153	-106	-164	-279	-729	-217	-170	-240	-307	-210	-174	-166	-74	22	-303	-120	-50	227	190	-45	-21	-7	-65	11	-305	-95	-80	-3
783	147	121	107	14	336	132	22	4	59	72	64	14	-50	156	-183	-34	-46	-230	371	129	170	144	45	185	113	654	19	72	558	-21	8	66	-16	28	51	46	-36	-27	-15	7	-75	19	26	-4	23	192	25	27	113
784	-17	-93	1	-27	147	-13	-20	14	25	4	5	-28	2	56	-513	-29	-103	1139	320	-13	17	25	-114	-10	54	-12	15	54	-166	-38	-3	25	68	-41	-7	-52	-7	30	-86	-18	-261	23	-95	-133	-124	31	-50	4	16
785	-8	-5	38	-41	-17	-2	4	39	50	-9	9	0	-22	-25	100	63	-109	771	-334	-95	37	-42	26	-23	-2	184	27	-6	182	128	-41	125	68	-11	-32	-32	4	-19	56	66	-1	-101	-16	3	-58	-186	66	56	-25
786	317	-432	15	186	353	-406	-149	9	124	-21	33	38	42	72	155	236	125	2277	752	338	-65	225	-277	45	-126	561	216	-380	-722	-444	484	-412	432	45	-17	214	-130	223	748	250	-196	138	26	378	365	-105	42	-36	267
787	91	25	159	393	142	58	432	313	104	254	516	82	140	67	-180	281	138	-1054	372	24	18	31	272	497	351	-112	164	31	168	-9	75	295	209	187	146	243	100	90	28	84	23	670	222	39	137	-56	168	185	301
788	2342	3112	1579	14597	3074	1486	5321	6461	3283	5182	6160	1335	1686	1175	5045	5765	7836	4298	2281	1167	1768	1598	1343	6218	8919	2439	2094	2083	1858	1985	1176	7376	2616	3818	1453	3643	2278	1297	3153	1646	1277	1811	1525	3457	1300	1280	1549	3268	4303
789	49	262	194	375	16	109	-32	191	97	298	81	95	49	270	-112	37	303	920	1554	34	51	108	217	84	172	179	313	101	607	542	110	338	77	5	89	78	279	580	396	125	187	265	139	179	142	267	160	177	217
790	78	325	419	137	405	386	184	238	384	294	444	177	329	404	121	147	101	1053	1169	385	378	375	415	139	217	105	220	708	330	201	463	320	454	487	294	251	230	85	19	227	169	555	243	127	442	457	281	77	393
791	306	226	625	671	191	1043	386	349	443	812	718	782	581	262	697	264	464	-381	-150	1143	877	858	1153	1127	763	-31	184	671	210	1209	229	415	405	1897	899	835	694	207	354	502	494	197	772	336	607	1510	453	542	1062
792	99	206	78	-20	172	105	18	71	49	106	5	86	55	141	271	249	95	589	-181	-15	57	110	-66	10	43	155	116	69	99	192	170	68	231	240	284	-413	228	-235	244	353	105	394	65	94	-60	41	358	31	125
793	891	156	480	388	139	560	813	510	824	548	2011	952	328	266	-280	-75	416	-168	593	486	827	933	1142	293	432	583	90	749	156	157	713	654	1464	1433	1099	1117	535	222	120	252	938	800	510	421	403	1060	3069	689	421
794	446	764	314	703	319	330	414	424	846	1140	1037	343	281	305	161	439	-3	1812	771	980	1669	377	707	632	543	50	300	339	305	117	283	525	143	893	294	535	739	319	137	229	140	545	278	163	463	320	280	220	271
795	58	89	70	29	-13	179	-35	36	55	64	177	56	-12	-28	-1150	19	56	-274	48	148	22	85	80	135	135	-105	61	119	-165	1	45	112	65	252	187	64	1	-55	-114	84	19	64	19	26	73	185	67	27	28
796	145	242	202	187	229	141	131	118	183	135	434	145	122	172	368	52	225	356	588	491	459	25	268	549	227	200	23	148	272	169	121	135	193	195	124	-5	142	204	249	123	142	179	141	54	182	119	134	25	94
797	161	2323	1214	188	175	940	355	470	550	520	862	1109	772	662	556	-2	92	321	536	952	559	2164	1415	1112	697	161	280	681	881	1108	606	676	1436	1326	618	456	255	135	238	401	608	291	758	414	577	196	359	343	962
798	-1	-73	-68	8	46	368	420	183	67	370	507	177	193	217	-1343	396	108	-7	545	338	186	159	437	181	451	-109	312	678	3	74	81	367	97	573	425	125	791	156	153	249	506	349	835	727	214	320	979	633	838
799	453	752	593	1358	240	767	568	816	701	1738	1099	846	1045	521	2299	756	299	1338	557	1155	1063	739	476	1236	1248	1251	328	450	1408	924	675	391	1260	1153	1042	1600	1036	448	1415	583	786	565	1122	424	944	882	804	866	962
800	1161	674	517	1181	663	1031	871	733	932	711	1014	1495	2008	1075	1765	1188	440	1215	901	894	777	996	2011	1138	1138	1066	621	762	1215	611	1046	991	2553	1722	1063	1378	1509	1211	1106	718	601	1092	767	620	666	2665	1489	1548	2703
801	-42	83	-28	59	-322	103	3	156	16	114	39	55	113	-47	-254	-32	-56	-208	482	24	51	50	152	160	74	116	227	153	-464	-37	35	336	14	65	61	64	125	285	44	5	73	241	156	118	115	231	202	114	148
802	1104	688	1030	1162	1631	1159	706	672	758	523	667	720	512	1016	3017	1055	1410	36	-40	855	623	893	757	727	719	1656	1052	674	1759	761	1256	1601	738	349	585	567	825	1014	1705	1273	918	833	916	866	304	55	310	669	627
803	417	298	465	516	1067	443	482	-200	372	1043	673	544	431	338	1189	1066	771	1207	1459	644	738	564	1329	577	687	1118	569	367	1049	526	789	549	353	711	514	666	548	1003	1210	626	677	553	642	553	1012	333	799	500	625
804	666	1175	1084	510	565	746	439	375	728	680	588	401	230	529	2054	476	583	550	1944	303	793	805	1277	720	366	813	287	912	731	599	814	796	521	509	526	391	606	632	452	349	1283	513	1292	469	791	432	356	1319	397
805	-149	-167	258	-135	-370	128	-353	-75	222	-38	181	-1	179	-46	-1818	-116	-439	-3445	-1582	307	112	-78	107	1	47	-3351	-385	134	-240	-262	100	29	97	170	210	412	34	-203	358	-6	-34	29	-102	113	50	-190	114	27	-124
806	76	231	55	289	134	106	-6	95	213	183	226	57	134	-5	-426	59	292	291	413	585	159	105	172	449	314	-250	62	172	300	108	91	197	106	164	214	230	216	153	464	144	180	104	156	25	37	738	203	195	88
807	166	188	170	96	136	87	221	299	161	154	349	347	461	279	-311	8	85	-960	458	165	255	254	269	256	-16	-608	159	171	59	40	309	311	400	508	248	336	391	124	627	620	257	208	557	54	1849	-46	411	204	312
808	86	357	526	223	241	155	145	229	374	514	574	720	703	646	-1169	146	54	80	402	837	779	894	1515	685	240	26	321	652	55	244	833	914	1811	412	1165	363	283	453	-43	654	1102	145	392	1147	968	745	484	690	638
809	275	522	364	325	294	595	176	190	526	354	298	537	216	406	184	239	463	177	148	29	508	591	1790	362	428	761	303	444	23	123	326	223	559	550	338	739	622	577	547	547	637	579	494	482	379	478	395	295	445
810	766	727	1085	747	632	742	260	676	703	503	475	753	364	619	-1628	-692	483	482	867	436	1023	560	-9	680	381	540	454	618	916	729	677	605	240	945	246	248	444	1214	996	633	321	1125	486	844	247	467	307	872	611
811	16845	11720	8881	33528	17030	15072	22846	18592	15494	15829	10639	15444	34542	24467	38279	27446	56799	9710	7789	10107	8828	12950	17728	17562	10869	21093	14712	10164	18929	27180	30649	14352	21655	10296	11687	13050	40861	25211	25766	17034	13236	9800	14967	15526	8225	18247	10530	29535	25042
812	38	79	27	-122	-45	116	30	-82	22	-113	15	33	113	58	741	-151	3	1302	567	19	-47	45	39	-57	-45	249	-47	-5	155	-50	15	-94	-1	-88	103	9	-96	-21	-66	-1	-64	-150	7	15	-243	-68	43	24	-21
813	392	585	333	277	429	140	309	223	476	438	502	195	555	345	1136	224	473	244	763	319	836	491	310	326	293	506	379	588	551	332	183	165	339	631	329	410	442	558	-46	272	343	414	611	113	298	266	553	277	480
814	1063	748	632	483	151	377	316	570	747	225	333	471	406	452	-268	644	359	422	516	289	351	293	1242	555	549	25	264	422	677	872	598	555	711	746	313	477	442	650	1641	463	702	614	728	441	696	572	635	421	453
815	646	486	617	776	781	758	546	613	684	627	855	771	698	584	1176	404	480	1676	774	1109	667	686	1412	1074	571	591	439	590	1063	528	873	909	1591	1664	1943	903	576	1206	1690	1084	1095	1306	1047	1178	805	1020	1723	658	1139
816	804	800	764	872	982	551	441	660	770	756	803	786	528	630	-401	564	510	290	1307	494	810	850	701	575	589	365	661	756	1556	1105	781	874	1204	868	511	861	348	1265	1149	719	841	1104	559	650	823	1004	846	730	663
817	68	55	15	102	-59	97	61	45	129	43	131	22	67	-11	-560	102	-195	551	192	72	10	-20	-42	51	39	31	-44	114	-35	8	136	39	174	113	60	-76	42	-73	-120	73	47	42	32	7	35	-34	34	99	29
818	146	65	178	82	-44	60	183	212	273	141	193	530	373	193	-453	169	-46	-186	452	29	330	269	190	123	236	100	-31	126	70	1	7	91	79	294	61	111	77	262	99	58	74	229	280	141	107	178	101	231	108
819	41	530	540	342	64	454	264	498	402	428	309	433	574	205	-333	321	491	1202	272	476	298	305	346	277	307	216	216	565	585	442	323	469	696	545	448	368	383	506	379	261	376	569	436	257	295	781	189	284	764
820	1137	636	1194	1980	1299	1015	1283	2245	673	2778	1362	3833	3248	1320	1924	2666	1596	3276	1775	5508	954	813	1818	3665	1187	4188	1541	644	992	496	2754	537	6828	3560	1162	5094	559	1603	2141	1018	544	2379	2511	556	1003	189	395	4009	5707
821	-278	-328	-119	-159	-447	-153	-78	-165	-178	-177	-131	-128	-84	-104	113	-321	-67	129	-743	-91	-88	-161	-167	-48	-21	-255	-251	-261	-195	-282	-182	-219	-7	-24	-86	-231	-186	-282	-748	-79	-66	-232	-83	-230	-148	-209	-100	-67	-131
822	537	758	493	332	584	439	436	856	593	378	614	923	362	507	-235	456	124	721	554	392	665	853	602	365	195	207	216	254	-132	386	290	223	449	332	199	350	-2	442	555	100	278	448	300	207	345	408	359	225	236
823	1442	1517	1393	2135	2442	1612	1516	859	1396	1418	1565	1506	1050	1420	503	1448	2619	-1006	1092	1681	1187	1306	1955	1101	1256	-352	1255	1479	2106	1947	1473	941	721	1578	1602	2265	1945	1348	1137	1087	1829	1124	1683	1724	1168	1773	864	1116	1380
824	-812	63	-382	-423	-3428	-427	-214	-440	-148	5	-60	-145	-222	-378	-1341	-405	-700	-54518	-28116	-118	-187	305	-291	-22	437	-473	-258	-176	-817	-767	-616	-922	128	-47	-101	188	-34	-122	-523	-368	-7	-261	-486	-4	142	-474	-248	-25	-315
825	-24	-97	59	-271	185	40	-124	-74	5	-203	-86	-60	-84	-70	-1210	-42	-73	670	-6	-54	-52	-128	-49	-143	-26	-26	-32	-44	-194	-149	-45	-105	-70	-120	-43	-144	-104	119	-63	29	47	-6	20	23	-154	105	2	-97	-33
826	-216	-549	-233	-288	-97	-385	-144	-216	-399	-112	-108	-95	-176	-105	-84	-148	74	-1821	-2252	-118	-197	-83	-298	-183	-144	-264	11	-472	-94	-565	-139	-266	37	-156	-84	-293	-199	-71	-105	-112	-93	-284	-170	-182	-168	-371	-139	-186	-14
827	-533	-409	-429	51	200	-309	-234	-138	-387	-193	-60	-8	-141	-182	1204	-285	-17	-2136	-1122	26	24	90	166	-144	-305	-1171	15	-18	-230	-231	-110	-182	-117	-39	-15	58	0	289	-221	-187	-202	-241	-219	33	-72	-13	0	-52	-312
828	928	468	365	873	1488	815	521	530	640	675	544	784	936	664	1329	993	1649	4803	2665	735	701	658	903	577	783	238	1025	722	1590	1104	1099	703	580	386	964	830	625	1037	949	504	736	697	710	1155	863	1669	688	520	937
829	497	597	371	521	794	267	603	517	153	396	440	131	500	266	1682	455	434	-440	-526	483	688	335	-106	531	509	2081	426	76	872	643	862	970	409	289	363	691	558	359	1079	312	435	396	825	115	497	785	695	471	727
830	518	821	374	545	472	691	308	439	383	678	502	353	446	508	1431	467	501	1384	274	388	625	677	826	851	647	1367	269	682	1537	840	172	693	464	350	423	751	518	522	614	280	601	551	448	452	323	1155	474	197	548
831	-175	50	460	1922	-604	254	1311	344	1348	517	945	541	296	873	1862	749	1081	-1719	932	1326	1056	438	4355	841	287	852	1103	801	-304	1082	1862	837	1724	1151	352	963	2019	1063	1662	1423	1414	1348	1223	1175	949	1878	1187	1637	1466
832	218	359	146	406	432	338	106	184	243	307	285	295	434	223	-165	513	259	52	47	409	294	229	513	357	274	193	171	210	510	284	111	562	365	229	313	647	335	369	439	199	169	90	329	166	181	738	449	239	386
833	43	-35	87	162	183	158	-36	32	-9	143	80	3	-80	10	-135	53	17	74	-483	33	-49	105	218	99	69	-61	-15	-70	-186	-4	128	125	29	21	314	241	31	44	-57	44	43	-25	119	232	-41	288	14	7	313
834	-28	151	404	177	472	309	21	123	130	268	269	320	295	53	274	254	-171	1058	43	251	156	221	789	468	139	207	154	67	163	237	236	122	300	421	229	392	213	659	388	380	200	251	378	270	234	478	165	208	73
835	586	767	636	-196	480	772	328	-7	227	591	712	958	-2	1095	-262	267	170	-737	457	425	844	576	197	315	379	259	476	91	266	-17	-244	-79	-46	247	392	287	-13	204	-422	-131	-125	-257	204	270	218	511	392	58	37
836	53	83	289	73	106	78	209	124	10	374	326	248	222	165	-204	160	136	-144	388	303	269	453	310	315	213	42	23	228	194	197	174	40	618	622	416	168	21	133	38	159	150	13	74	66	227	580	209	98	305
837	449	1432	1054	773	1617	817	475	800	619	673	832	478	938	691	1769	783	758	3089	1367	1381	1053	921	1378	874	409	-455	420	776	967	718	1023	768	670	1194	1025	1547	780	459	949	562	551	452	981	493	732	1313	442	459	586
838	48	510	467	198	-546	167	88	38	751	468	339	265	215	199	31	-69	-188	-546	308	225	516	256	414	826	345	-1209	-35	573	1346	338	787	160	1356	511	144	445	482	266	457	278	187	756	298	8	160	311	349	762	284
839	410	164	306	607	120	596	388	604	211	905	554	311	520	667	-108	337	202	2159	192	808	1147	307	479	488	1200	516	89	926	506	1966	344	1954	879	1012	504	2936	1262	1059	1086	194	347	929	720	893	1035	1107	426	226	854
840	112	2245	296	146	270	158	237	89	175	213	140	236	163	114	-1421	70	-44	-675	-33	-36	303	216	156	63	100	-40	28	877	-32	49	35	201	563	423	254	32	93	120	63	113	74	272	405	116	49	376	505	129	502
841	140	410	649	223	359	200	185	299	352	372	500	354	524	242	975	475	205	771	484	309	455	566	350	351	372	208	295	546	319	347	181	576	234	479	357	253	317	141	279	188	191	379	312	104	529	709	652	238	285
842	1387	1975	1994	4812	2964	1186	3358	4590	1962	6575	5092	1183	705	1120	3483	4727	3598	2240	1256	1199	1537	1162	663	4851	6366	1046	1007	1640	668	555	781	2805	1514	2247	1207	4624	647	660	2569	691	636	2219	711	1928	2980	525	2135	1308	2065
843	618	2129	1941	1558	1917	657	1029	1798	957	1048	625	1754	892	1150	2217	1265	1720	494	803	569	1780	1264	1281	721	905	1897	849	1297	586	623	1234	1446	1005	699	597	331	920	719	2787	1195	722	1105	1002	1018	2257	515	1087	3258	432
844	-122	-82	182	-107	104	170	46	43	13	-95	35	106	-86	35	611	-199	131	776	-259	-13	190	62	134	-45	-78	174	-228	16	-185	-218	-190	7	157	175	-12	-118	-63	-57	-70	69	-92	-259	-65	-276	889	-198	-130	215	61
845	42	-64	59	351	-46	-134	38	77	53	410	18	56	94	81	-839	166	74	-798	-24	17	4	48	212	378	76	356	127	-124	-442	-61	123	-85	310	183	68	114	48	248	-122	-190	27	152	106	19	51	-47	56	-14	283
846	268	139	144	1067	-336	103	356	269	57	891	384	939	113	30	-700	109	-378	-1686	-177	251	254	549	693	672	911	119	52	344	556	295	136	186	436	842	164	639	330	527	569	63	560	2110	348	142	150	-16	936	61	397
847	431	930	941	596	420	632	362	866	887	1078	970	829	565	1449	69	651	424	500	371	1335	298	522	562	947	981	456	420	697	237	686	836	613	554	621	451	251	384	615	253	237	539	692	647	365	514	504	450	511	662
848	810	582	794	469	464	298	164	227	501	923	807	423	491	1137	770	666	805	-369	-584	797	783	495	1036	678	493	15	771	627	792	659	654	497	921	613	413	1111	602	1213	701	275	395	821	498	306	604	796	542	555	421
849	106	256	192	201	34	130	15	140	331	313	198	199	178	154	-152	-3	-14	556	58	242	96	185	226	314	313	-574	107	7	24	172	101	115	338	528	175	253	215	58	-184	338	6	493	-3	154	108	-84	153	56	138
850	1281	1491	935	892	675	731	1120	1261	752	1166	1734	2176	1864	2014	1538	1363	1162	220	988	1208	1314	1243	2482	997	820	1784	1829	673	1291	824	2216	1621	3553	3150	1414	1222	1463	1616	1548	1192	1631	1560	712	731	1290	1460	1378	815	1556
851	2009	3208	1883	1753	3647	2561	2944	2760	2246	2940	3567	4415	3265	4551	485	2575	2355	7590	3837	2246	2081	3004	2173	2478	998	2246	2675	2298	933	2568	3134	1369	3109	2574	1061	1038	2908	3816	3141	2113	1050	3461	1563	862	3241	1230	1752	3792	3449
852	-7	297	202	-74	219	219	43	-81	71	115	274	545	320	158	669	117	-74	655	182	153	300	373	-86	146	48	-297	20	-67	-84	-2	-89	172	61	268	16	33	21	61	43	-52	84	263	63	34	202	171	381	105	155
853	1383	2522	2573	1673	962	1297	875	803	1300	2822	2162	3353	3518	2204	-287	1203	1870	-4093	4081	1469	1201	2455	2120	-58	1383	2641	2300	2165	261	2263	2369	728	6616	2818	2398	1327	2587	2814	923	2742	1393	1009	1463	1306	2113	2027	1523	1204	1049
854	33	-127	-28	415	159	-116	-6	-136	-24	357	11	-53	129	23	-1620	152	85	-3	653	321	-58	255	267	159	70	-201	-1	-7	-6	-21	132	-171	-25	336	136	186	-146	-51	2	273	-43	187	100	51	-178	-124	-11	-13	436
855	91	-42	91	-6	33	136	35	-54	286	613	358	109	195	189	544	-128	-70	2179	-1058	604	176	557	62	395	310	34	63	85	-761	71	158	249	269	374	439	1373	-103	-129	49	245	219	-147	222	28	315	457	418	-47	165
856	164	634	186	1256	333	229	232	215	146	572	402	455	428	214	1428	233	269	-376	262	104	341	507	606	526	310	464	162	275	356	331	122	418	464	317	238	474	246	488	1123	528	431	144	249	95	130	492	567	353	468
857	288	330	430	357	364	729	531	481	520	590	638	497	358	270	-474	384	169	1419	526	1752	721	545	659	593	493	472	204	268	297	484	348	678	474	724	285	698	315	170	363	131	343	347	341	349	683	319	458	714	370
858	167	616	887	390	453	825	228	708	362	484	590	370	595	550	191	409	901	860	991	716	604	486	1055	921	586	-112	273	246	458	572	793	526	915	576	589	232	466	654	932	588	610	1023	1031	736	505	864	373	673	585
859	79	44	53	104	-68	243	91	29	174	84	154	277	136	72	194	-78	63	846	-198	81	141	333	466	293	73	-1	-44	84	66	4	6	176	236	638	199	150	203	99	196	22	325	342	136	29	160	222	214	266	86
860	187	92	142	112	141	157	240	241	168	298	104	234	82	150	-271	102	-20	-1336	-425	112	235	79	192	341	112	335	5	154	384	186	-54	449	4	265	103	190	-41	-4	242	82	60	73	-11	61	127	65	102	175	61
861	247	301	340	244	56	779	156	143	357	233	422	245	193	194	-503	342	164	491	451	417	729	270	227	403	269	84	98	238	180	249	192	171	218	434	203	205	196	183	116	493	117	213	246	171	182	372	258	151	139
862	2248	1572	1658	3624	2549	1562	1964	1194	1719	2781	1902	2225	2237	3046	857	2308	1904	2852	2466	3177	1873	2268	348	2044	845	2428	1976	993	1667	2009	1493	1696	2328	1079	1506	2698	1665	1744	2261	1688	1350	1784	1451	1562	1417	2501	2332	2704	1286
863	356	1480	1332	921	602	731	612	1257	1019	962	755	685	429	773	173	568	1346	53	1694	235	922	949	374	659	839	1378	233	929	612	1026	1109	226	1346	1117	762	1512	936	1145	612	1078	440	810	357	652	359	793	87	655	477
864	194	302	431	231	131	349	408	487	201	488	556	377	282	702	198	146	173	657	264	641	309	528	293	399	287	438	315	217	92	248	658	469	142	559	150	301	290	167	382	107	233	358	243	305	281	275	222	320	305
865	-795	-500	-603	-711	-663	-887	-1022	-1932	-563	-1336	-741	-1031	-1083	-209	-313	-617	-1046	-5019	-4296	-101	-466	-570	-706	-1117	-1526	-2824	-1060	-101	-1708	-873	-883	-2203	-272	-785	-617	-475	-1167	-854	14	-1465	-1024	-1152	-19	-450	-1218	-1395	-956	-1338	-787
866	557	342	706	567	318	527	453	632	397	586	633	430	280	466	1215	524	935	1018	-28	255	528	587	635	639	392	949	322	283	506	656	513	395	397	354	276	615	442	549	644	511	460	468	528	335	379	781	185	665	466
867	-217	-121	562	-124	104	-102	18	-284	-103	-18	-95	-50	17	-9	751	-135	8	58	-255	20	-123	-97	-155	-18	-188	120	0	-61	-239	-301	-227	18	-150	46	62	32	-79	215	-129	-176	-47	106	-127	74	165	-61	176	-151	16
868	57	-41	17	-43	66	-77	-23	-43	15	-124	30	13	36	-6	-140	104	62	-742	-68	233	147	-111	85	64	-98	-79	-93	46	-79	-76	-55	50	78	54	-45	112	28	29	-94	-72	40	51	52	-6	93	-75	-25	-123	-45
869	12	-46	112	-4	-44	14	23	58	47	136	58	148	-8	24	47	9	43	-378	-198	28	35	177	90	94	60	5	16	63	59	73	41	28	6	115	78	143	25	114	-27	-15	-1	144	-21	73	22	-3	123	-23	-1
870	1019	973	1113	764	1237	426	991	1581	1002	982	1052	1356	933	1121	2831	1572	1804	1093	1011	764	1090	1380	749	814	648	2337	1023	503	1905	956	1034	782	1531	477	393	613	853	943	988	866	552	1037	495	593	736	395	489	715	580
871	37	285	222	8	143	107	37	196	101	271	313	363	196	377	-108	183	131	137	140	229	94	267	204	156	214	-115	95	210	409	151	59	-44	211	409	171	59	31	24	305	181	73	204	234	125	213	-16	110	208	180
872	837	1106	795	887	400	526	266	839	991	625	759	663	358	704	3138	927	1033	869	700	454	673	407	484	305	415	5596	388	413	2084	1267	1558	230	1074	639	622	1177	516	1076	1462	609	1451	470	580	574	438	89	453	577	799
873	-5	18	115	182	66	-121	-86	-120	-185	135	128	129	49	158	-335	95	156	7	471	-104	59	26	95	-120	-80	286	43	-102	-231	-27	316	74	138	97	-45	-2	-54	243	302	-4	-34	164	-49	-12	22	-235	-133	28	-6
874	368	374	836	440	959	181	199	361	242	329	435	356	374	684	369	565	368	1000	80	566	517	323	665	203	329	595	459	333	171	789	351	131	424	251	259	773	326	580	807	504	88	600	348	208	220	467	150	229	258
875	302	316	114	179	484	173	349	237	185	86	51	187	168	68	-1591	384	179	-286	91	99	219	135	764	147	29	-41	398	398	703	481	270	395	255	470	201	337	605	2032	975	133	212	626	395	200	198	-2	275	205	920
876	610	889	646	514	310	578	322	578	1004	689	567	1001	671	768	306	614	586	1431	555	946	1543	820	920	864	367	287	434	1041	1018	442	1141	759	1720	922	671	994	571	1120	1260	683	659	1097	500	318	997	878	855	431	949
877	603	683	578	269	246	362	408	369	307	190	301	371	362	378	455	451	434	3091	1425	136	406	472	298	298	355	957	179	566	516	262	442	304	628	228	361	346	500	515	809	430	452	204	490	90	472	572	288	264	169
878	-224	-493	-59	57	-170	-111	5	-84	-79	-63	11	-216	122	-215	-635	140	25	-327	-21	-34	-94	-210	6	-101	-218	1651	499	-7	-856	-112	81	-298	72	739	-38	240	4	299	-456	45	69	-84	-36	140	-12	196	-12	29	331
879	1299	1018	2671	721	992	838	824	1634	793	1351	654	926	980	1460	1283	1102	667	1073	74	432	1488	908	1036	863	506	543	585	576	988	854	1547	376	1004	1119	637	1518	463	659	1817	497	439	1278	36	219	359	1199	417	447	309
880	153	216	368	98	132	290	84	297	263	420	262	22	224	84	171	186	376	1391	-73	430	169	17	380	368	203	-253	32	293	-78	50	50	310	281	379	306	1425	-19	109	102	126	78	286	-10	127	104	152	171	98	311
881	991	816	633	645	457	502	492	395	836	955	543	593	791	348	-457	83	397	-888	-245	306	352	538	1247	349	832	25	553	625	790	482	799	974	1214	282	274	619	408	465	467	522	787	351	479	310	422	536	-16	843	808
882	150	173	135	55	-142	128	1	111	-79	378	84	179	451	153	-81	2	103	125	-402	271	229	-7	321	49	192	-134	-19	146	-88	125	-8	-53	185	130	111	353	-129	10	-39	112	128	122	-149	48	457	-37	167	2	176
883	76	359	170	145	162	251	12	67	114	213	210	200	185	106	-327	260	-18	-31	-525	268	221	103	396	269	101	-153	7	31	298	174	136	170	413	151	47	126	114	33	258	-6	51	212	-1	16	143	256	134	95	163
884	327	580	746	741	224	533	525	382	650	844	1288	673	1101	612	-349	422	215	294	940	967	1243	1007	1629	1461	867	299	210	648	753	650	409	941	1066	1371	812	1746	440	449	292	598	292	291	386	435	526	1375	1052	769	850
885	70	291	215	63	177	167	168	68	153	277	259	108	252	176	-728	181	52	1347	100	352	265	183	267	398	237	-24	26	227	-85	199	161	256	184	341	190	272	93	66	141	224	262	102	190	46	137	377	133	173	148
886	108	275	185	92	124	374	104	64	195	179	90	66	106	-37	-97	49	120	771	704	261	182	33	157	78	67	79	108	453	902	265	270	160	99	154	221	301	169	2	-50	99	233	92	305	183	-32	313	249	122	178
887	7586	11787	9208	6589	6514	5731	4355	4451	7403	4673	3781	3708	4793	16019	3293	12396	9449	8943	10546	5917	7963	4218	2875	4051	3006	8776	9723	3884	4888	9063	14487	5144	4476	3498	5853	6320	5114	12791	12164	11935	6168	3954	4817	9059	3876	10850	4500	6009	13835
888	106	139	170	67	71	36	61	85	179	226	153	40	320	202	242	15	63	-1342	318	280	178	160	6	417	239	8	166	123	278	232	49	299	133	246	110	119	138	64	85	207	180	-7	111	1	222	547	-35	334	123
889	10	3	127	89	295	14	21	75	42	77	25	-44	-32	7	-567	65	-89	1147	311	-49	18	1	426	-7	84	-50	-21	120	7	74	-43	135	93	252	237	43	154	51	12	287	156	232	388	161	328	79	116	28	115
890	338	453	291	258	393	136	302	217	352	241	159	182	205	375	61	269	323	773	563	155	187	232	92	170	237	348	172	315	448	511	241	326	213	77	124	241	337	214	340	404	244	126	180	207	309	222	233	121	202
891	108	568	324	748	307	400	-21	108	663	68	147	37	218	594	1029	701	1165	1204	385	230	408	200	-96	-158	77	867	102	594	1497	649	550	262	210	145	41	234	438	875	786	607	288	562	400	758	108	164	162	402	438
892	1877	1856	1148	1268	1091	1079	1499	1373	3370	1912	4702	1436	801	527	2635	1619	768	1379	822	1521	5197	2121	3038	1789	7869	1272	1654	2599	1584	1619	2371	2313	8852	3096	8013	2032	2461	5209	1796	13018	11485	8203	4027	4360	2271	2999	1370	4117	2104
893	-109	-66	-88	-295	139	-143	-145	-289	-81	-41	-147	-30	-138	-227	-351	-269	-76	-1469	-1133	-189	-214	-31	-52	-112	-49	-792	-152	-61	-339	-213	-215	-119	-155	-49	-90	-209	-83	-121	-1005	-114	-286	53	-272	68	-219	-152	-148	-81	-99
894	204	154	466	180	229	194	187	282	456	535	515	283	628	306	1283	371	278	-925	911	101	522	492	903	539	358	320	124	703	430	251	269	284	220	413	491	1493	242	387	1080	344	196	243	301	61	381	458	412	508	190
895	3425	819	1805	713	699	1087	1194	1183	2279	537	1159	1590	1141	1520	5424	1338	1595	-2679	-313	720	814	1543	1011	464	363	641	1727	698	461	859	1951	1898	599	1289	958	1685	859	1453	1461	1863	1302	1280	1253	1371	2036	1564	1387	9130	1166
896	-454	-628	-299	31	-175	-244	-1	-94	-499	-217	-216	-204	-67	-233	-263	-343	-303	-1869	-230	-308	-496	-83	-457	-551	-628	-2818	86	-245	-864	-491	85	-237	-277	-160	-151	-463	-106	32	-778	-136	21	-297	-237	-130	-261	-362	-350	-212	-109
897	-61	-142	59	-22	-25	-56	14	-25	40	-43	17	27	57	39	-321	-124	-105	-86	303	-19	-6	-17	-212	-96	4	-52	-9	52	-203	-60	-62	-27	-10	111	0	-79	55	113	45	82	47	121	66	130	1	27	86	91	22
898	178	259	13	282	414	139	209	82	228	242	130	395	221	96	-185	640	729	321	-578	136	92	113	179	65	3	336	181	272	353	615	122	37	415	-83	-38	-13	395	279	334	13	116	-37	-95	16	467	96	68	371	407
899	304	271	352	327	241	268	238	316	312	328	348	196	228	206	915	135	359	2129	1132	268	402	386	555	291	397	336	182	311	533	389	330	360	267	248	226	351	294	286	471	91	284	167	164	178	231	580	417	178	117
900	-109	-77	119	-41	-99	-66	174	-103	32	-82	31	-33	-51	-9	-1407	-1	143	-602	-63	15	-9	-16	-8	11	-97	339	78	119	-210	2	-76	171	50	80	100	-103	5	176	71	-113	74	202	-61	22	38	-34	37	80	117
901	30	388	342	69	320	237	95	109	540	237	313	166	178	281	-150	208	192	969	118	311	364	304	352	264	155	126	107	135	258	308	153	175	71	186	264	277	107	261	268	248	53	215	106	167	414	282	379	179	148
902	226	294	37	190	518	84	190	312	248	104	158	486	93	16	-359	157	265	702	487	389	55	108	164	14	206	179	273	504	3575	1998	171	115	285	137	88	295	406	2756	154	103	937	244	276	261	42	453	5452	186	540
903	-165	-287	-220	-232	-312	-216	-199	-215	-233	-135	-102	-165	-203	-155	-221	-499	-134	-1398	-213	-107	-187	-94	-49	-80	-142	-192	-21	-358	-576	-356	-75	-312	3	-94	-53	-172	-187	-203	-289	-138	-162	-294	-209	-27	-74	-226	60	-116	-69
904	192	321	102	-21	123	-27	50	259	15	191	177	34	108	215	646	-50	-79	220	-15	191	-70	-22	111	41	48	121	61	54	259	-80	-44	40	-64	134	87	52	31	92	-16	19	-96	208	-76	234	250	87	156	-26	67
905	499	765	466	560	559	353	355	367	560	468	395	448	308	307	1089	642	804	223	-113	163	177	482	504	218	182	748	505	594	1004	546	753	344	343	327	357	708	243	793	537	410	321	426	394	329	279	964	215	365	299
906	-924	-1049	-1376	-694	-255	-435	-1580	-842	-635	-896	-818	-429	-295	-100	-916	-1473	-1811	-1741	-1687	-267	-392	-758	-623	-318	-483	-2986	-629	-191	-2521	-784	-1027	-1426	-479	-237	-542	-776	-608	-844	-2918	-1642	-1276	-744	-410	-742	-145	-502	-380	-531	-1028
907	81	269	16	-49	41	108	46	191	87	59	72	2	17	80	239	54	156	613	229	5	27	33	102	175	173	364	-35	47	193	205	103	22	19	35	28	50	158	165	43	106	70	30	-42	-35	92	165	30	38	14
908	92	317	179	140	137	175	148	112	241	70	126	69	68	116	1233	79	-122	2674	472	59	180	188	5	77	82	427	144	193	631	171	99	282	225	116	117	207	99	308	-153	135	164	373	150	-8	59	177	186	103	41
909	38	409	258	40	336	-41	-122	-150	143	102	-90	24	116	-14	687	114	286	2191	382	51	180	100	-60	-116	-118	-384	241	22	334	396	202	99	144	17	39	-128	-44	248	629	42	-11	162	69	166	-16	-127	-55	166	63
910	1382	812	783	925	-42	519	504	746	680	392	676	1097	667	994	1922	923	1214	1497	2454	387	1021	532	572	1228	508	1239	778	656	1180	1006	1078	1020	571	825	453	504	1022	1246	902	567	1104	402	822	661	967	339	337	1134	642
911	-255	-69	-90	-127	-101	-85	-161	-146	-113	-204	-93	-120	-154	-35	509	-177	162	301	-145	-95	-176	-189	-41	-110	-35	232	9	-100	-463	-237	-95	-57	-191	-79	-19	-181	-175	-4	-401	-144	22	-40	-52	-69	106	-166	-43	-27	-40
912	2439	1418	4161	871	1838	1206	1860	1182	1420	2408	1721	2177	1081	2188	1234	1211	1037	-172	681	912	2289	1649	1584	1670	1682	2487	1289	291	252	1261	1390	4790	1546	1424	2399	870	955	1957	1341	1768	4666	1069	768	1482	1471	712	1890	4967	2672
913	374	321	116	490	341	264	236	175	256	182	29	235	27	126	208	-39	282	1549	481	15	83	217	268	82	146	439	427	254	164	195	224	617	126	105	105	229	608	682	594	188	508	213	438	492	94	-23	357	200	558
914	545	184	183	119	694	334	189	212	370	131	287	224	121	390	299	394	113	-650	659	171	-6	161	343	361	102	439	292	264	186	106	155	234	32	75	66	152	98	119	87	-79	113	143	278	199	336	157	35	225	48
915	476	120	232	237	170	168	203	283	239	164	159	82	107	244	547	461	460	135	247	159	248	108	-653	132	188	205	308	376	1017	297	127	341	256	-119	23	206	128	50	496	83	225	453	106	320	212	162	160	-33	215
916	218	263	53	689	761	45	67	203	127	545	316	182	157	259	1712	307	-56	751	775	140	531	237	-90	337	261	342	273	44	106	646	210	28	-47	22	93	33	139	173	126	31	105	-49	44	24	47	131	-41	65	105
917	-35	2	72	-120	-206	-87	64	-45	54	101	32	86	14	53	-795	140	42	9	104	74	29	54	86	80	49	427	-36	191	379	123	7	97	-79	75	42	60	50	-48	15	109	164	488	-30	126	41	295	91	39	63
918	2979	2765	3763	2504	1436	4294	2801	1912	3913	2688	2340	2388	2531	3751	78	3695	2688	2892	2500	2640	4411	1532	1103	2208	1832	1136	1604	960	1032	2669	2312	2731	807	664	864	1450	1663	2402	2179	1091	1747	2115	1567	1792	1353	1472	1624	1460	2063
919	395	429	284	173	350	259	182	117	131	248	182	121	8	142	1321	114	382	1061	431	140	105	84	-54	158	170	366	259	-5	433	235	169	407	169	81	1	147	154	493	272	326	48	390	264	99	184	131	91	128	36
920	125	171	138	79	124	74	126	80	148	121	79	78	12	54	141	152	110	-713	225	209	100	76	258	114	102	10	10	63	58	83	75	68	-23	184	128	102	94	292	279	108	34	29	154	62	32	186	98	32	35
921	144	220	60	122	567	83	166	160	118	61	22	40	118	70	705	207	247	1870	1818	39	34	39	92	47	50	-247	57	203	148	252	87	24	93	-16	67	99	82	111	177	89	134	99	22	143	-14	74	35	42	141
922	-2	-109	-51	41	-141	-27	-104	-8	-71	-92	-33	-48	-86	-72	-928	86	4	-140	49	-100	-312	-59	-48	-13	24	-350	-36	24	-63	-40	-169	-76	-89	66	-45	-74	-85	-19	-340	-52	-26	-90	-9	-1	3	-67	44	-11	-95
923	-10	107	-95	-36	51	105	41	143	66	-181	99	236	94	80	5	27	-91	373	424	-66	-54	246	-226	6	-66	-104	-82	19	-77	-166	-27	-7	-27	191	39	-3	126	4	17	49	-54	50	94	78	-45	34	115	-98	-12
924	274	79	443	671	217	346	194	408	619	671	808	390	1007	643	1238	619	440	-496	-28	944	458	621	2284	853	610	292	358	1014	1866	1002	902	707	1050	767	530	2744	974	370	1094	1881	1742	891	613	773	638	434	702	778	521
925	167	1056	1964	1111	704	704	682	628	1131	895	1119	342	686	881	1752	752	326	255	1617	940	1202	724	755	1007	809	838	265	612	783	1380	375	976	920	989	750	1182	621	541	1131	949	1068	458	944	249	1010	1084	513	762	322
926	-17	215	65	-33	-119	-63	-13	105	35	72	36	-75	40	45	-484	120	103	1184	-643	-47	296	-62	217	130	39	62	23	185	153	2654	107	213	136	127	32	-16	44	192	45	24	25	313	150	235	-54	284	172	-2	129
927	2633	3942	2965	3044	1313	1404	1563	2073	3641	4008	2641	2125	2637	2340	912	3223	1769	-482	422	2841	3129	2650	5337	4720	2660	1542	2200	5694	2460	4115	3321	3147	4709	4381	3562	10175	5108	4758	2637	4652	3873	1547	3696	2929	3392	5468	5140	5820	5148
928	33	-93	-146	66	238	-32	-8	95	11	-10	2	-99	-107	-101	-292	-51	210	-491	185	59	-97	-43	54	97	208	-204	-52	-21	-100	-102	-160	-29	-168	-12	-39	64	8	-162	-336	-139	-70	50	-68	-86	-39	303	149	46	16
929	491	441	685	867	551	505	209	727	573	697	501	448	297	410	998	187	544	311	0	509	691	636	580	688	939	1302	466	657	1505	307	639	809	265	592	414	965	342	822	729	364	830	139	742	372	597	847	412	203	476
930	-156	-49	-84	336	-18	-120	194	506	-19	256	247	-10	7	78	259	379	488	-26	-390	121	-659	-217	-33	181	204	-61	201	-75	-330	-136	-149	-45	135	15	54	-175	-206	-156	-8	14	-73	3	-78	-57	111	-106	-77	187	298
931	68	0	68	40	-32	-40	125	55	89	31	25	-2	49	19	-538	-202	27	-1099	224	135	20	61	-213	87	12	-116	55	-4	289	-23	64	84	-12	105	-4	23	110	100	33	35	27	214	46	87	21	138	-57	-28	38
932	-245	-18	147	-80	-99	-99	-149	-125	49	-345	44	113	-149	31	-387	-27	11	-388	159	-115	-168	-33	29	-32	-68	161	-160	44	-545	-164	-252	-25	-251	-37	15	-71	-81	8	-427	0	-44	24	-120	-245	188	-18	-7	-138	-286
933	-124	-36	-49	-18	130	11	-78	-10	-7	-88	-56	25	-81	-23	418	102	1	-594	-678	-122	-119	-70	0	-52	-37	-62	-85	-476	351	-28	-122	-26	-159	-68	-71	-133	-4	-74	-202	-93	-86	-6	78	-21	31	-19	-100	27	-46
934	-557	317	207	259	-220	232	162	303	495	245	80	67	-205	-134	-1947	288	42	-1813	-815	-172	211	149	233	-101	-494	349	-95	-348	434	263	-50	260	589	148	132	285	101	33	720	313	125	545	47	-211	-16	-344	-166	-102	334
935	-128	-195	-95	-192	-212	-15	-195	-142	-146	-147	-93	-45	-96	-112	299	-163	-185	-783	-26	-88	-116	-26	54	-170	-136	-757	5	-138	-197	-268	-114	-189	-88	-75	-108	-146	-137	52	-99	-50	0	57	16	-246	5	55	-149	-183	5
936	-885	-80	-591	771	-366	-546	-906	-98	-417	448	182	-308	-447	-324	-3832	908	868	-7926	1175	125	-750	-121	-897	-134	-219	498	-253	-1035	637	1285	-1061	-197	-455	-298	-228	-284	-649	-188	-1807	-1059	-763	-557	-366	-379	191	-589	335	1372	-281
937	134	113	143	287	257	96	193	339	127	96	142	84	154	198	-262	15	182	-229	-55	62	126	87	151	76	123	470	143	235	583	236	160	166	129	112	65	118	214	226	161	152	122	126	32	75	158	480	5	119	38
938	1884	3186	2627	5052	3749	2922	1876	3012	2588	2068	870	2058	2415	3116	5659	8431	3909	4717	2476	1742	3024	1631	1213	3371	2593	1330	1573	2102	6039	5469	2463	2789	2754	1600	949	2096	3588	3625	11821	4150	3363	5355	2204	1084	2793	5276	1159	1280	2160
939	-127	-102	-96	-118	-32	-21	-38	-88	-48	-60	-83	-64	26	-30	-495	-182	-24	-51	-90	-56	-59	-167	-238	46	-191	-224	-32	-186	-225	-39	-140	-101	-99	-129	-29	-112	-107	-72	-163	-84	-89	-116	20	-6	-99	-25	-23	-63	-16
940	2845	1788	2059	2872	2542	2397	2749	1035	3229	2113	2684	2152	2466	3062	2343	1700	3381	3320	5274	3081	2106	2040	1521	1868	2256	-10	3708	2568	2443	3328	2202	2141	1932	2371	3291	2154	2940	1790	2051	1820	2732	1033	1827	3510	2610	2103	2776	2183	1920
941	2681	3524	3370	3048	1501	2542	1212	3150	3529	2199	2062	2452	2490	2296	1311	1640	1669	1207	1119	3197	2082	1390	496	1969	1520	824	2876	3377	885	2777	3235	3324	2371	2295	1237	2991	2129	2068	3602	1271	2087	2550	2869	1029	1715	1694	1133	1544	1488
942	129	184	240	278	-86	243	62	134	184	260	402	187	325	143	-126	-14	129	709	333	197	229	192	203	173	422	83	180	478	110	266	150	252	362	218	424	404	187	226	463	217	144	237	11	129	953	19	379	113	145
943	30	-208	97	101	10	-78	52	211	25	-61	-64	58	128	125	500	84	143	698	-378	-170	5	-36	-47	249	-46	173	165	299	-21	-29	139	78	34	-82	25	-131	120	191	-1128	196	83	140	-10	7	-96	-374	-30	59	67
944	3849	1314	2398	591	489	2665	1591	1368	3218	1083	2411	1801	833	2135	1270	831	719	643	968	1989	1601	1227	908	616	856	1134	2180	2236	840	668	2580	1704	1124	1655	1852	773	1086	1965	1293	1994	2397	992	811	1060	2307	1709	3124	2251	1698
945	932	1123	773	851	367	752	462	690	1061	611	504	605	1016	679	688	713	616	387	776	873	418	719	1658	684	851	407	630	1074	2847	1380	1008	1006	827	1116	941	1957	1303	592	957	812	1258	628	736	1672	872	1112	2659	1307	531
946	-325	-131	-10	-144	-95	93	-66	121	42	67	-64	-40	85	3	-396	-92	-224	-265	-496	322	35	114	33	-105	86	-206	76	58	113	-92	-11	129	15	-18	22	23	-96	13	206	-5	60	-144	23	-89	281	111	82	77	88
947	543	480	367	1608	336	434	981	902	551	500	732	111	-5	201	1401	743	781	883	832	185	223	73	268	798	418	732	419	277	308	539	458	609	463	519	471	450	171	481	546	602	677	557	366	609	440	317	432	539	642
948	-200	-155	-230	-133	-224	-200	-281	-133	-176	-36	-96	-29	14	-81	-751	-269	-109	-1736	-1377	-93	-122	-58	78	-175	1005	-639	-77	-168	231	-109	-213	490	51	-62	-125	-161	-245	-90	-189	-52	813	40	-158	441	2568	-349	-164	-173	-196
949	4826	4646	6113	3090	4158	3970	5134	3223	6610	2935	5008	4757	4145	5131	4309	3242	3454	3364	5780	2021	6874	3843	7499	3148	4277	5197	4050	3754	6638	2508	7622	4338	3482	4639	4157	4449	3699	4051	4095	4641	4425	4073	4061	6778	4632	3794	4354	30629	4311
950	1505	1765	1326	2081	1033	1997	921	1219	1278	1679	1198	839	872	688	3187	1256	1606	4998	3014	1117	1269	1335	1786	1640	1275	4514	1169	1898	4314	2433	2664	3934	817	863	1207	1619	1871	1528	1824	1163	2645	1561	2264	1463	1296	2289	1247	1330	1603
951	671	550	331	322	538	436	373	237	325	187	191	201	116	175	956	560	242	1640	528	53	246	264	-33	170	108	108	193	353	573	373	398	352	130	103	137	220	246	371	586	272	302	393	230	457	279	264	223	235	265
952	272	-273	-168	-18	825	8701	-63	-223	-144	-143	-42	2246	-213	-69	-382	-110	-196	704	153	-30	12	1967	6814	-146	-132	756	-125	13	-405	-216	-266	-122	-29	699	-1	-124	-65	-173	-149	-210	12	-67	1300	-49	-61	-118	-113	-50	-67
953	2120	1854	2025	2972	2734	2663	2462	2811	2058	4222	4574	3387	5362	3763	1311	2202	3410	1526	3701	5629	3200	5256	5441	4711	3663	3309	3452	2296	1323	3267	3892	2133	2180	4898	4171	2863	4161	1957	1978	2027	2429	1451	3460	2904	4284	4346	4296	3017	3237
954	-50	-3	39	63	135	58	20	95	15	14	-10	-25	54	63	-268	-106	-167	-82	794	-42	-37	-2	-3	8	39	-60	23	5	150	38	119	12	59	-14	-3	-70	27	29	142	67	44	161	-113	67	-21	-33	-23	84	25
955	310	80	568	345	567	558	453	239	292	663	867	686	426	395	-558	242	329	366	157	1007	674	637	398	465	824	595	242	1210	394	546	286	491	483	453	945	606	376	177	227	275	249	330	501	330	387	889	385	537	362
956	-138	-219	-88	-193	-276	-130	-163	-91	-49	-52	52	-147	-86	-75	-1359	-400	-226	-1089	-369	-10	-11	-147	-80	-107	-82	-109	-153	-17	-333	-221	-229	-461	-89	-53	-53	-135	-117	-87	-405	-161	-237	-298	-65	-110	-58	-164	-30	-14	-102
957	286	202	1594	751	800	911	13422	1128	-128	27	1672	-33	800	52	1404	833	26	431	51	525	544	-7	165	336	1305	746	228	875	1064	304	19	1018	98	158	211	174	352	4170	482	284	496	832	833	137	621	303	296	53	234
958	-613	-569	-338	-379	-283	-495	-394	-399	-319	-240	-181	-272	-194	-175	73	-377	-92	-932	-958	-262	-238	-255	-450	-243	-220	-677	-84	-335	-294	-520	-339	-388	-112	-162	-121	-159	-216	-371	-70	-362	-233	-262	-249	-472	-112	-515	-113	-75	-130
959	664	498	521	900	1488	842	1132	1268	441	272	212	749	681	672	1159	756	745	1967	649	389	407	596	261	225	517	1402	1262	598	1635	754	526	738	425	205	232	666	903	1120	1067	641	595	502	886	475	315	705	-33	360	419
960	-189	-89	110	-313	-301	-5	-68	-152	-66	-47	-110	-63	-107	-78	-842	-232	-89	-882	-118	-65	-7	-100	-241	-8	-187	-1655	186	-138	-198	-63	-46	-79	-20	-44	393	1899	-171	-77	-169	-147	55	62	1932	-99	-95	-187	-98	5	-183
961	3645	2193	4903	1473	4917	5189	1913	2970	2205	2227	2463	3473	2363	5056	1938	4557	5066	1049	2722	5938	3268	2999	1073	1487	2511	1048	4018	1278	1041	1800	2781	1136	757	1682	1762	972	1336	1940	722	1110	1641	615	1283	4720	2898	2506	1811	3351	1841
962	2083	2081	1278	1602	1926	1818	1311	2111	2242	2114	2615	2241	2792	2493	498	1387	1574	1036	1732	2525	2447	1840	1040	2060	1522	1802	2089	1164	739	2411	3410	1285	2218	2871	1752	2211	2140	1615	1159	1582	2057	1622	2344	1678	2140	1847	2037	1030	1617
963	328	243	273	210	436	314	373	424	232	429	457	266	464	464	1957	566	870	3659	1715	366	289	548	661	403	405	3300	445	227	673	366	526	433	347	292	292	593	326	679	857	321	369	352	364	221	410	616	343	408	246
964	-250	-347	-93	-185	-78	-183	-275	-212	-345	-158	-73	-110	-111	-114	-1487	-90	67	-568	-920	-89	-98	-142	-261	-278	-181	-232	-67	-123	-757	-263	-164	-447	-27	-192	-179	-138	-308	-102	-437	-506	-44	-392	-110	-224	-58	-368	-416	-258	-148
965	3884	562	3846	3132	4916	1051	3657	6745	3280	6192	5082	4459	7817	8020	6768	2903	5731	9364	7912	9472	6304	5299	6439	4116	4403	5237	2840	1274	2100	1858	8914	3465	11841	5553	7545	5380	6012	6393	8358	12582	6356	7712	4166	7579	7034	2860	3759	5759	7538
966	809	2847	3479	1655	2592	5655	2476	1520	4370	2237	6660	899	3273	1504	2415	2020	1717	1549	8802	3213	2136	1983	3763	2068	2962	-1220	2350	3916	4984	4612	1373	2475	1839	2328	2283	3340	2982	1943	5657	1481	2260	3817	3331	2601	2720	3443	3450	2624	1208
967	126	147	193	519	377	149	645	514	248	468	334	234	257	219	1012	399	780	2206	91	171	360	319	194	496	549	281	440	209	250	140	91	550	284	285	403	146	313	82	453	254	258	41	463	410	207	202	585	302	290
968	1876	3291	2339	2213	2983	2649	980	1582	3495	1328	657	1661	2110	4116	7815	4223	2847	670	-176	1404	2274	767	79	1882	1629	2533	2597	3138	4686	1874	4655	1756	2062	999	826	1444	1640	1505	3657	1877	4078	1914	1784	3168	1449	2502	1213	914	2148
969	-415	-328	-182	-726	297	-339	-330	-294	-235	-266	3	-137	-350	-576	-1362	-884	-986	-2295	-2773	-311	7	-183	-161	-576	-29	-221	-276	-472	-639	-369	-367	-593	-302	-153	18	-549	-485	-385	-834	-343	-535	-431	-510	-416	-147	-672	-161	-620	-152
970	94	111	-16	-10	-95	87	-32	98	-133	-88	71	129	-32	-133	-599	14	267	203	56	8	-67	44	161	54	73	-462	-42	-65	-243	-54	-107	6	13	98	128	-198	22	-28	-28	-62	227	-17	-59	66	174	-172	-9	81	-13
971	30	30	6	42	171	-62	27	23	-13	50	0	-8	4	61	-376	114	-17	-860	-458	-45	12	52	-64	1	-110	-114	64	-18	-51	-64	-7	-147	-31	-42	2	12	55	92	-94	-65	-7	63	-24	32	22	15	-59	0	-30
972	36	86	24	141	196	199	118	95	83	39	81	10	-118	132	-1359	76	169	-368	822	72	-129	54	74	23	3	-19	64	-112	9	59	100	-102	-86	-45	77	-109	171	-53	195	20	93	183	68	-264	21	-340	130	127	-54
973	347	542	314	790	1168	450	521	622	374	393	383	261	238	449	2578	655	738	3147	1850	241	351	370	490	326	311	777	577	60	513	611	834	570	369	262	250	412	621	756	892	643	739	469	568	495	494	669	398	488	300
974	-296	-289	-149	-336	-334	-275	-151	-1	-157	-132	-104	-120	-178	-156	-192	-170	-51	-1472	-19	-94	-625	-185	-228	-272	-153	-496	-166	-78	-417	-256	-160	-178	-127	-286	-54	-206	-188	-66	-332	-145	-135	-161	-9	-352	-92	-274	-71	-175	-192
975	1742	740	614	1765	1386	569	1186	690	569	1436	1235	900	745	192	3021	1323	2230	4933	2625	1201	437	1179	652	957	1373	1148	1706	748	1686	832	1019	704	495	534	1025	1087	1401	942	-101	1110	463	655	877	1288	1148	859	1152	863	950
976	-100	325	4	15	99	162	1	52	208	110	130	-66	122	155	227	281	-234	658	-69	-126	101	52	-1	138	121	776	28	152	168	17	198	106	-79	214	-92	-87	14	66	536	-98	111	139	30	75	208	-266	335	77	-48
977	769	303	1435	207	1139	153	405	401	640	202	1225	610	621	3630	-26	558	799	-792	163	1896	817	465	734	436	577	2310	1487	1284	21	-68	2800	360	2579	512	1521	206	478	4281	1086	1255	1246	631	271	914	1270	1792	638	787	1454
978	232	249	208	219	269	231	278	230	159	153	102	139	253	125	809	9	331	69	-1765	107	180	106	127	160	220	473	202	159	366	253	89	72	204	33	142	216	211	50	224	218	146	192	113	255	234	195	107	172	-22
979	1239	3903	488	463	617	693	195	352	294	467	327	1291	1273	435	12467	3036	898	-255	-71	98	654	712	1046	919	963	265	364	513	2313	1676	860	246	922	552	506	660	725	741	3402	474	507	573	825	490	124	483	198	592	968
980	-384	-524	-334	-452	-343	-661	-318	-235	-283	-211	-153	-147	-178	-231	-1718	-490	-446	-2235	-1440	-64	-171	-169	-188	-195	-151	-1313	-194	-269	-498	-595	-433	-403	-169	-104	-81	-166	-328	-416	-550	-290	-272	-280	-97	-176	-109	-192	-128	-218	-203
981	-98	-51	147	-49	-279	-13	-91	-90	204	5	38	-65	17	-163	-490	-193	14	297	-171	25	106	172	119	90	-29	-107	-58	-49	-31	-52	23	202	-254	-20	54	95	-73	-225	-108	-56	-25	1	10	-14	-9	-152	-75	48	26
982	44	1873	20934	28924	748	1042	478	478	4338	13713	93	1050	3032	5284	708	9290	971	24618	38543	16700	15835	625	-200	7703	4727	1372	15396	-165	93	30751	308	1899	300	138	71	-67	64	62	1263	-43	194	138	123	314	133	228	188	26389	188
983	-24	13	-4	-18	-189	56	16	7	78	62	27	48	32	33	827	6	-1	-42	-9	63	265	2	121	55	40	168	79	170	149	6	31	182	17	37	38	94	-73	165	-84	16	18	21	112	80	76	58	72	49	34
984	-79	-71	-135	-50	-134	9	8	-137	-62	53	-24	-76	-30	-35	753	-111	-263	-720	-1	44	-14	-256	20	-41	-207	-79	-59	-137	110	-69	-77	-52	-187	-24	-91	-149	-70	154	28	32	-62	86	151	-17	-18	-151	-116	-27	-33
985	27201	22191	18053	19621	11182	18127	15531	19302	19434	14876	9346	10450	16238	29682	13667	16320	20593	13390	23844	20390	22203	10280	6368	10991	23128	10011	23930	26997	24904	26488	32029	23907	27408	13678	20601	15546	13268	43015	42995	31940	16089	23012	10386	25165	9194	34115	20184	18825	24898
986	462	624	612	946	216	397	568	574	354	503	208	-9	258	337	2361	593	567	925	247	437	310	191	422	47	295	1539	287	488	280	271	728	551	399	279	218	398	376	393	763	567	736	464	193	164	180	688	238	233	452
987	-20	-10	-44	-58	-44	-26	26	-93	-17	-30	13	-39	733	39	-515	72	-30	404	-78	129	38	-24	137	76	55	114	36	79	205	-18	-45	14	7	50	-8	41	13	36	-96	104	-4	-99	-33	-144	117	232	-24	-93	-13
988	261	244	126	112	119	177	96	408	129	79	150	156	175	80	391	231	299	193	611	29	27	178	779	130	204	556	265	268	514	332	438	283	247	256	61	212	76	293	463	138	290	221	274	228	77	138	267	137	202
989	2066	2263	3573	4012	1847	1716	2605	2477	3558	2569	3724	1740	2742	2285	414	1474	1425	3318	2881	3768	2780	1495	3417	1943	1964	978	2794	1101	2015	2376	2103	3208	2311	1950	2814	1850	1445	2827	3899	1417	1965	3802	1381	1283	2214	494	706	2251	2297
990	1981	1984	1591	1145	1497	1795	1793	1938	1351	1134	2084	2525	2257	2851	-305	1982	1534	1298	1269	1439	1047	2670	1162	935	1606	575	2433	1597	2034	1240	1246	1583	3633	1512	2304	2983	1370	1936	3521	1193	1122	2433	1045	892	2249	2151	1331	1529	1660
991	2793	1702	1479	2395	2658	1598	1978	2328	3199	1121	951	3240	1385	5394	3956	3715	1848	7006	2162	715	2563	1418	2634	1121	1055	3745	7008	1796	2572	2323	2757	2289	1285	1191	1487	772	5239	12041	3089	1271	2367	1386	1349	1713	1025	2781	5303	2565	7139
992	242	121	165	212	187	260	221	220	119	60	166	171	43	144	363	145	145	185	46	147	91	113	25	119	53	-183	103	296	509	197	219	114	36	99	141	82	141	151	163	158	63	90	90	64	199	9	106	152	40
993	583	713	509	531	418	514	342	634	625	285	541	268	84	266	508	529	139	-467	271	266	760	354	548	286	549	307	376	887	1134	641	417	505	149	269	438	631	454	882	968	568	590	709	196	57	305	841	420	260	512
994	7284	8791	7178	13172	9085	10606	5724	6086	13068	7970	6982	9165	10150	7212	10517	8712	14206	7661	8167	6137	5851	7626	12183	3998	8902	4714	15196	3362	9464	18623	8254	9134	11316	4204	9018	10131	15525	9034	19752	9888	7377	8053	11314	15987	9698	3010	11735	13179	4500
995	-202	-338	-160	-237	-159	-161	53	-411	-85	-149	-47	-80	-81	-155	-276	176	-96	-1014	-603	-95	-92	-226	184	-141	-156	-1533	-111	-66	-653	-48	-139	-138	-6	5	134	-123	17	172	-44	-144	94	19	-22	30	5	140	-60	8	102
996	-2	42	7	-56	-86	21	44	21	6	-34	5	-33	45	7	-885	-46	84	-99	-257	-15	-47	-16	-77	27	39	18	-34	-14	-106	-85	-38	60	-17	-14	-9	-32	13	-113	155	-4	-14	-9	25	20	-29	-35	-7	43	-37
997	663	402	706	350	391	292	227	453	397	363	291	278	337	322	347	544	624	1937	614	215	330	376	573	191	221	1115	458	375	1217	736	486	552	317	320	50	559	379	443	1145	471	410	447	151	353	239	392	187	313	250
998	375	1387	574	47	183	1079	459	261	263	81	319	1343	153	482	1503	96	64	-520	-209	393	200	863	141	50	134	-1	571	253	225	126	491	169	124	411	215	-298	178	466	611	129	330	287	91	185	422	162	284	94	301
999	1046	639	518	542	329	520	377	483	435	566	529	703	365	434	1120	755	332	1038	616	361	477	473	1060	694	508	651	761	192	834	503	672	770	667	540	657	410	644	553	340	382	480	405	281	530	518	724	475	566	459
1000	73	48	-75	-90	201	-62	-5	-62	23	-70	-21	48	-3	-9	370	-100	-134	-589	-252	-27	39	15	-69	-45	-140	-69	22	-24	81	-104	-76	-53	33	16	20	-107	-54	54	57	-79	-50	10	37	31	-88	-78	-22	31	15
1001	218	251	73	254	223	248	333	358	176	259	242	306	301	125	-908	320	145	287	77	134	169	228	529	230	664	811	354	396	615	255	262	424	175	346	458	172	457	512	31	150	449	332	624	476	162	271	899	149	293
1002	165	174	154	48	64	209	203	135	97	135	130	89	47	69	158	174	98	-249	495	104	149	110	71	98	104	283	79	154	244	107	100	142	243	121	95	77	147	120	118	161	104	27	132	90	75	115	134	89	209
1003	34	-1	-15	-73	108	82	-3	-87	-62	-91	-8	-7	-67	-11	97	-54	27	-405	-248	-76	10	-38	-72	-76	-40	50	-44	-5	163	-26	-24	-50	-84	21	-41	-80	-31	-21	54	-14	22	58	50	-93	-13	-109	-133	-34	1
1004	2068	1560	2188	1514	-88	3556	1184	1287	1537	1855	1258	1102	1180	2232	231	3253	4296	-12270	-9960	2525	2557	1044	1063	1532	1639	-3698	2516	1579	1427	3181	3287	394	427	630	1302	1175	1440	2593	2092	1957	1772	1185	1619	2541	2114	1719	2030	1979	1835
1005	563	328	72	431	898	505	-14	173	135	230	-143	59	75	185	566	371	361	-1611	599	-32	117	-245	-15	-55	-166	1611	558	201	1266	909	720	286	26	-82	43	222	652	522	1125	484	970	13	217	452	-98	-426	214	-451	175
1006	374	190	369	589	531	319	225	307	311	340	226	282	232	202	1847	604	877	-1368	-483	212	211	412	151	191	377	1084	350	231	1168	355	380	289	361	72	167	291	571	365	395	209	288	230	270	200	296	212	160	179	220
1007	200	381	183	78	327	311	-76	126	241	209	158	178	213	132	92	115	1001	188	342	-274	75	171	-31	12	175	4147	464	240	453	290	399	169	262	65	122	118	277	262	367	102	237	214	211	351	58	43	34	317	32
1008	-778	-846	-317	-1044	-198	-438	-746	-754	-578	-252	-498	-412	-638	-490	-1628	-671	-1135	-1425	-1642	-270	-570	-466	-96	-199	-457	-3175	-515	-405	-975	-733	-1236	-1050	-743	-330	-53	-655	-205	-495	-365	-564	-462	-624	-666	-513	-336	-43	46	-648	-715
1009	-111	104	-51	-328	-190	24	85	-318	-74	307	5	-198	194	120	1529	340	341	-5306	-4567	86	-228	363	-327	-81	-34	1407	-46	134	407	193	-165	-421	120	6	-29	1815	427	173	101	225	170	-21	-121	392	-111	-77	71	15	66
1010	-49	-72	-10	-101	34	16	-2	-55	-8	-20	-27	-43	3	-6	131	-65	-4	-268	-63	-37	7	18	9	-28	-51	-4	-14	-27	-82	4	-22	-20	-78	-14	-28	-35	-55	9	-40	-11	11	-57	41	-35	-45	-63	-39	-8	-40
1011	-2575	-2086	-737	-1559	-1222	-513	-2420	-2593	-712	-950	-900	-992	-1647	-875	-4316	-2399	-386	-5787	-4766	-1045	-748	-1103	-696	-1517	-804	-1885	-670	-581	-2620	-1896	-1173	-5116	-2053	-923	-779	-1166	-2578	-534	-3305	-778	-1381	-1430	-1480	-1779	-761	-866	-950	-897	-713
1012	587	1514	1246	3088	961	1212	551	1054	469	714	1070	819	1381	509	1080	1893	822	1083	360	358	476	893	947	1169	955	1065	319	2516	1255	788	728	1050	1034	838	445	586	2449	979	1287	965	625	581	484	377	1887	4185	2056	671	1658
1013	-1081	-913	-834	-1414	1017	-976	-1346	-2053	-421	-585	-471	-932	-557	-688	-2806	-950	-1243	-3305	172	-58	-627	-353	-982	-1156	-887	-570	-894	-443	-703	-1263	-1128	-1676	-674	-839	-693	-820	-1023	-531	-802	-962	-736	-436	-210	-661	-483	-1017	-490	-480	-407
1014	-1914	-1250	-1179	-2497	1381	-690	-2539	-3966	-820	-835	-593	-1171	-1327	-839	-26508	-1536	-594	1472	825	-699	-651	-286	-1738	-2332	-1947	-577	-1148	-1011	-4586	-1518	-1003	-3013	-505	-1035	-1255	-1482	-1074	-1155	-2005	-1058	-1337	-1611	-1796	-1770	-773	-3155	-114	-592	-1120
1015	108	69	37	30	189	191	42	132	44	26	135	218	142	89	-1182	130	171	420	186	178	103	158	102	162	94	-61	92	73	-160	36	59	64	244	207	172	396	80	51	90	132	-64	155	8	122	212	180	142	133	162
1016	-55	-312	-82	-58	-167	-244	-59	-118	-64	-166	-75	-82	-90	-48	-551	-86	-189	-866	-115	-18	-51	26	-492	-234	-98	50	-13	-90	-633	-320	-181	-65	-31	-48	-82	-54	-67	-29	-268	-122	-45	-139	-71	32	12	-162	8	-67	-98
1017	-448	-197	-216	-502	152	-48	-148	-345	13	-500	-564	-258	-139	-74	-239	-218	-169	-1290	361	164	200	-61	-757	-233	-289	-547	-311	179	-317	-79	-727	-42	-15	-259	-351	-616	-50	149	-222	-74	-110	318	279	-226	-117	-209	-221	-18	63
1018	-423	-167	-288	-212	48	-242	-174	-234	-236	-96	-54	-192	-168	-152	-918	-141	-402	-563	234	-30	-98	-222	-65	-91	-170	-2130	-189	-95	-199	-250	-53	-160	-65	-3	-61	-165	-97	12	-437	-386	-180	35	95	214	117	-436	-198	-148	34
1019	448	141	281	908	539	360	398	436	302	554	282	340	249	229	-171	414	475	841	1134	262	184	391	276	472	394	-967	246	270	724	451	290	328	578	397	216	437	220	201	611	224	110	160	221	328	277	232	80	69	194
1020	-1047	-718	-276	74	-171	-393	-398	-547	-209	-592	-484	-311	-114	-286	-1827	-192	-411	-2753	-3314	-387	-779	-427	-246	-674	-900	-1950	-312	-738	-1256	-296	-306	791	-147	-315	-334	-915	-397	-657	-927	-354	778	-39	101	-189	-608	-942	-476	-413	-314
1021	-373	-479	-244	-328	-131	-296	-263	-280	-313	-264	-180	-205	-155	-251	-2430	-200	-428	-1074	-1052	-221	-246	-317	-310	-228	-287	-558	-230	-307	-883	-519	-364	-483	-279	-92	-38	-256	-227	-409	-640	-286	-324	-103	-342	-117	-378	-78	-221	-171	-191
1022	3579	2633	2560	2591	1866	5185	2011	2479	996	1802	1387	2072	4992	2382	2346	2650	2655	2078	2182	3692	2223	1800	1592	2418	1991	4366	2916	1356	2141	2777	2045	1500	1399	1430	1071	2583	1800	1587	1692	1590	1201	892	1282	952	1285	1894	1052	2137	1279
1023	48	531	-125	279	-41	206	518	-1001	677	8	-8	-30	-208	176	2980	-328	559	-29447	-13888	472	-254	130	-923	-712	-437	-2806	280	129	1272	404	364	-253	17	-257	-216	-218	213	483	-115	116	335	675	686	472	434	64	410	646	3
1024	233	497	596	548	1505	290	435	989	735	207	323	267	500	535	3264	447	1283	-697	-443	385	123	95	-69	-98	184	1700	893	-29	1190	-164	693	498	417	248	-63	241	488	1121	513	573	424	287	692	476	82	212	298	759	395
1025	55	242	57	141	-244	144	98	-100	212	82	63	58	78	-586	219	322	-184	-1743	-2205	90	186	123	-145	141	161	1802	313	329	520	192	307	44	199	68	45	130	114	190	541	117	258	-8	280	336	206	256	300	207	91
1026	88	54	47	-35	104	8	9	135	44	-52	47	-17	79	-25	-419	111	-26	897	-38	-42	-43	-33	17	-69	-77	-393	66	-93	-21	-81	-44	-61	-2	-17	-59	-51	-60	21	-67	16	3	42	37	63	36	99	-124	125	2
1027	-267	-181	605	760	-373	-417	299	-47	917	236	-103	137	246	-141	-211	-304	-193	-1033	-1347	247	503	59	-66	-325	2	-1106	-228	1020	-92	-335	1319	2121	576	215	581	-237	335	410	-197	943	80	736	478	725	-251	-135	505	-66	1355
1028	-164	-44	8	-33	-117	-35	73	-107	41	32	36	91	72	-133	-289	120	-140	125	-479	-28	71	-37	118	32	94	-19	-105	11	-54	-58	-133	-93	107	81	118	53	-18	-46	-30	86	-9	52	-33	-2	107	-43	102	51	31
1029	86	58	62	50	86	36	137	158	48	1	49	115	92	28	-616	284	38	1833	424	407	1	72	99	-155	35	198	101	88	267	162	27	115	85	27	33	115	134	264	144	75	34	63	44	19	47	140	-36	126	69
1030	-637	-64	-162	-369	-49	28	-220	-28	-400	-138	-220	-242	-135	-25	274	-95	-74	-1772	-629	-196	-122	64	-470	-251	-308	-277	-286	229	-20	-146	-194	-455	-128	-216	-119	-171	-88	-329	-53	-180	-209	45	-64	-119	-118	-494	-240	-299	-156
1031	181	387	289	271	94	208	199	280	108	317	233	139	247	48	791	298	285	-190	510	48	230	223	-38	133	239	289	129	184	557	337	301	230	275	84	204	369	411	277	450	341	273	187	132	205	318	121	250	171	38
1032	-186	-302	-233	-224	331	-128	-254	-138	-231	86	-66	-22	-119	-112	1575	-199	-47	-1749	-9	-89	-43	-134	10	-190	-157	-1039	-153	-147	-440	-627	-131	-608	24	-96	-84	-244	30	-216	-220	-151	-85	-93	155	-68	121	-61	-23	-106	-5
1033	-231	-126	-175	-104	-226	-254	-24	-387	-229	-275	-331	-194	-391	-101	-2035	-233	-253	-865	-1037	-89	28	-83	-118	-396	-213	-160	-234	-90	-490	-179	-432	33	-235	-88	-108	-154	-5	-54	-258	-63	-354	-75	-264	-51	-59	-170	-9	-152	-70
1034	796	740	1319	1720	1186	810	636	657	2011	898	1568	1210	869	1067	560	1019	540	-214	533	667	2061	1399	385	362	933	749	940	720	1041	863	1323	21	150	25	2331	2048	777	888	2587	2495	1203	957	498	863	1089	1168	1472	954	1218
1035	10175	3609	6460	5793	5135	4577	6710	6054	14401	4420	5564	7100	4304	7118	4975	4115	4418	6350	6930	4573	6432	4921	7221	4907	6237	733	9511	6510	10169	3879	9462	8397	5554	6858	4570	4779	9279	12155	6753	8565	10140	11667	7518	27712	12834	6522	11771	10598	4348
1036	1058	392	730	1011	1102	245	739	495	494	649	673	607	561	760	3091	1003	1301	2373	1538	466	552	902	985	757	894	3578	850	185	1386	652	924	754	561	331	309	934	968	1283	1320	799	860	766	534	838	626	982	536	964	611
1037	118	7253	128	411	-330	99	243	377	179	361	245	240	179	258	1243	350	228	-626	1316	406	403	362	370	304	356	-523	213	439	1072	430	361	382	171	329	156	482	158	398	696	235	362	471	467	224	520	475	301	224	128
1038	-38	-101	-60	-169	-75	-54	-74	-7	-19	-22	-25	8	45	-29	191	-197	-180	133	463	-67	-61	-140	58	11	-112	-164	-11	-27	-155	-157	-34	-28	-25	-72	42	-207	-151	-172	-29	17	-59	10	-59	50	-78	-185	4	-118	-12
1039	-148	-220	-111	88	296	-15	-48	-71	-274	-193	-85	-81	-176	-29	-309	-101	335	81	-203	-101	-20	-140	-158	-353	-263	598	-52	-207	-250	-276	-160	133	176	-104	-15	-75	-95	-47	-274	13	-75	-31	108	-101	19	-313	-91	78	-17
1040	383	526	363	702	457	78	263	832	614	721	229	429	461	582	402	412	550	153	402	475	625	517	832	363	791	1078	319	309	490	757	481	445	507	359	357	908	855	828	1456	321	516	460	151	416	725	1056	604	148	216
1041	622	842	763	296	492	617	406	604	632	633	627	382	227	524	1400	136	144	1234	554	522	529	643	596	303	707	513	251	800	1677	216	333	638	261	386	427	712	315	342	861	556	528	636	519	226	590	753	422	230	377
1042	49	30	-120	-50	-118	73	-132	-313	-248	-230	-339	-302	-392	-316	-2010	-325	-532	-4487	-1590	-119	-96	-215	-492	-231	-158	-641	-264	40	-243	-82	-225	-391	-236	-111	-77	-83	-168	-71	79	-429	-219	-489	-281	-130	-267	-301	-124	-118	-211
1043	342	1	-203	124	974	102	-353	110	-66	-180	361	-22	335	92	994	-20	-63	2200	2908	23	-174	61	-418	-182	-177	1158	132	-89	251	-128	-46	-409	14	-148	-30	232	192	-57	-70	-30	-104	48	-191	30	41	-286	-45	145	-95
1044	-434	-677	-361	-676	-402	-441	-369	-638	-395	-172	-155	-351	-333	-489	-1130	-873	-868	-1168	-203	-104	-144	-278	-23	-391	-289	154	-366	-286	-887	-529	-605	-418	-142	5	-327	-107	-575	-663	-414	-529	-244	-511	-476	-313	-913	-230	-229	-281	-345
1045	-301	38	-356	122	316	-42	-202	-155	-2	109	4	-43	52	-193	-384	-153	-50	1494	-7808	99	-176	83	77	26	-43	-24	-54	-15	82	136	-1	-191	187	38	105	58	149	-6	-246	52	-109	-57	117	55	159	161	118	-58	-83
1046	-53	-36	32	368	-447	23	13	-94	-86	-4	53	-15	7	34	26	56	-105	-3044	-2790	-141	-2	75	51	-219	39	-117	120	-62	110	-30	40	-19	4	39	45	50	7	-13	-146	52	-47	56	48	62	344	23	-22	69	-13
1047	-165	-389	-117	-444	-516	-256	-151	-151	-172	-259	-133	-90	-314	-96	-189	-104	-364	-35	327	-130	-167	-171	-82	-183	-347	-229	-241	-184	-377	-314	-476	-124	-421	-88	-205	-372	-273	-377	-472	3	-194	-65	-30	-50	-67	-302	-197	-28	-108
1048	188	97	126	53	48	14	-241	109	116	20	57	120	81	21	-814	-123	-39	-259	70	68	90	-20	-195	47	-48	-73	24	110	-27	151	87	86	-23	103	10	34	24	87	-87	155	-2	114	13	65	-9	-114	32	25	-32
1049	-263	-458	-104	13	-74	-161	-374	-210	-152	153	-35	-123	141	156	12	-81	286	2571	1534	-83	-90	-171	-13	155	-47	142	267	-70	-365	-64	340	-84	124	-95	-87	106	-155	-237	185	-102	73	77	11	88	-70	-502	-90	165	22
1050	301	54	138	132	295	108	108	45	88	7	242	198	-19	111	-248	190	70	633	134	38	977	661	370	200	-8	469	150	395	-105	103	418	116	60	2609	1546	546	526	55	-101	231	360	97	446	-27	207	339	968	545	116
1051	-726	-714	-761	-870	-552	-419	-762	-667	-521	-551	-548	-532	-457	-141	-1208	-693	-726	-2036	-2054	-525	-406	-334	-840	-810	-548	-1647	-593	-443	-1329	-743	-595	-883	-290	-358	-364	-884	-545	-275	-565	-669	-546	-97	-647	-593	-585	-915	-452	-481	-348
1052	597	364	616	238	448	598	611	330	455	454	386	249	279	383	-197	382	775	-325	500	292	323	409	349	123	440	332	391	518	684	470	441	129	398	244	204	314	532	370	478	187	110	385	239	135	341	498	162	402	352
1053	-85	-21	-79	126	215	15	3	58	-83	-167	-36	42	76	-50	135	194	-153	-901	-282	-78	-171	-96	-15	-48	-6	593	46	-99	155	107	-86	-14	2	-27	-118	-180	-31	-125	317	63	47	87	41	107	-46	88	73	-56	5
1054	-108	-62	3	14	69	161	-3	-41	63	297	132	-47	-316	69	-538	12	421	188	-641	33	22	-81	50	157	-36	107	-43	88	-412	20	-112	-32	-67	22	52	-182	-37	71	-486	-81	56	-257	-195	85	54	92	47	70	138
1055	921	682	580	728	716	632	569	657	592	515	403	146	377	358	395	615	870	-433	422	594	497	587	262	153	317	982	743	612	473	843	453	621	442	183	383	218	491	243	384	614	423	423	469	441	624	548	240	484	244
1056	124	1	70	79	158	-47	51	115	50	-58	55	86	124	44	-515	77	148	-756	237	91	213	103	146	28	14	244	125	143	152	121	132	20	47	72	48	11	88	115	86	134	67	39	143	83	603	139	48	127	117
1057	341	423	270	774	138	308	372	238	216	546	850	207	49	135	-336	842	140	711	-242	232	286	222	940	236	476	985	169	561	779	1017	132	676	498	513	533	617	280	295	445	47	173	504	331	215	447	463	516	349	231
1058	-40	-105	41	-119	-43	15	49	67	50	-8	60	51	14	6	98	-100	118	144	169	27	26	35	69	59	46	-25	23	-3	50	40	27	231	12	126	25	62	56	65	667	3	24	276	10	-24	-47	117	96	-24	4
1059	257	138	215	207	759	268	98	236	356	579	280	209	270	369	1587	386	708	-276	812	258	444	311	-66	-67	319	-155	364	3	352	296	344	74	316	403	181	177	337	653	1017	243	164	263	267	378	431	207	331	243	143
1060	2249	4376	1388	3394	1588	3592	1318	2816	611	1442	1658	972	1282	1810	1485	2061	847	508	2826	1982	820	2131	1040	2262	2241	844	1752	3089	831	5638	1731	1199	1684	972	1968	1282	1656	433	2861	283	345	358	2846	1326	991	1612	364	869	594
1061	-115	-11	-80	-113	-73	1904	-153	33	-21	-27	-32	-3	-181	-55	1911	-64	-253	-1698	-876	-51	-48	-30	-61	-168	-150	-694	-46	-81	-434	-9	-59	-128	-187	-36	13	-134	-180	-286	-133	-219	-17	-153	-120	-87	-26	-88	-136	-22	8
1062	-56	84	98	-5	-208	83	40	114	-11	9	24	56	34	34	79	328	-58	-77	-227	134	-76	101	-52	-21	70	-150	35	88	-175	51	63	-164	25	32	158	90	-28	38	-67	-145	9	-28	-135	159	18	42	-17	129	45
1063	632	517	249	519	504	409	259	615	332	336	294	172	172	494	2188	811	483	1647	1008	254	257	316	734	478	492	322	410	406	960	422	636	647	323	235	372	191	291	424	758	174	522	297	560	455	352	640	450	357	487
1064	-801	-583	-128	-474	-1222	-307	-149	-506	-392	-441	-139	-223	-302	-341	-1622	-568	-540	-2822	-5449	29	123	-211	-135	-214	-291	-5126	-337	-191	-463	-379	-421	-516	-351	-47	-150	-108	-315	-284	-188	-113	-224	-280	-311	-86	-123	-351	-27	-380	-197
1065	-72	13	-23	-216	122	-8	-171	-175	-104	-162	-144	31	-60	-14	-1038	-14	-307	662	-176	-87	0	-76	-193	50	-332	-1018	-19	0	-437	16	-184	-306	28	-88	-8	-153	-143	-63	-35	-151	-153	-196	-187	-22	-372	-295	-45	-72	-132
1066	-26	12	74	88	136	-50	41	49	29	39	39	35	32	13	-963	49	26	-552	-299	-62	-21	57	-52	-49	28	-32	30	87	122	-6	58	-56	-17	54	4	102	123	-11	109	24	82	-33	64	67	18	45	-12	-1	18
1067	459	500	404	427	481	495	199	283	413	540	586	273	493	274	-147	298	649	730	521	299	304	653	1331	237	189	1115	221	146	309	129	1091	273	514	204	385	772	452	464	565	275	380	201	314	-42	631	279	31	545	544
1068	88	329	40	77	247	2269	4	176	202	36	173	62	82	94	-134	79	-17	-487	-183	244	-58	85	-3	46	333	104	88	165	-33	113	-340	-18	-21	-25	125	-48	56	-31	173	-72	18	14	-193	-103	-55	97	50	70	-59
1069	84	81	81	5	69	51	35	49	25	87	52	61	47	10	337	120	43	1604	145	56	60	43	26	55	115	321	56	86	118	116	-163	58	64	60	23	73	32	34	162	56	115	-61	20	52	9	70	78	53	21
1070	40	97	8	98	-54	80	30	69	88	12	34	53	158	49	-455	11	-47	-603	27	2	57	18	137	82	107	-16	-33	67	101	155	51	143	30	4	0	8	95	59	-84	57	26	25	106	-66	54	-41	86	96	66
1071	-67	19	-23	-106	-93	-94	-47	74	-45	-78	-41	-21	-18	25	-968	-104	40	164	437	-134	-54	-77	-66	-48	1	89	-10	-127	23	-103	-2	4	46	0	-12	-77	-19	-68	143	-95	30	29	-34	-85	-11	-152	18	41	36
1072	-3001	-2101	-1716	-1889	206	-1219	-2743	-3208	-1887	-572	100	-2907	-1670	-1903	-3724	-871	2714	20041	2946	151	-2340	-1473	-1218	-1795	-2989	-5717	-1179	-1659	-2455	-2481	-2321	-2330	-1912	-1752	-1914	-320	-1064	-408	-3625	-1602	-1954	-1317	-895	-1448	-1244	-2255	-884	795	-1307
1073	1701	1241	1354	1552	1184	1232	788	1254	1442	1157	1047	794	853	1262	4237	1610	1876	9812	7183	888	934	985	822	837	1119	9170	1463	812	3344	1402	1317	1645	706	546	638	1003	1240	1803	2203	1265	1584	1476	1575	1262	1015	1142	931	1467	1187
1074	46	5	14	-50	-205	130	66	58	99	-53	44	-1	37	-43	-409	52	-106	-1273	141	-54	-110	119	128	67	105	-57	-56	110	-169	115	98	99	-73	13	-10	-35	27	28	-132	74	115	-42	-2	-34	-44	149	-26	3	-11
1075	-475	-313	-261	-514	-597	-595	-641	-982	-552	-847	-118	-710	-605	-695	-2568	-836	-990	-3047	-2178	348	21	-48	-775	-723	-351	-1022	-854	-794	-906	-280	-1268	-225	-234	-41	55	-253	-569	-951	-1144	-315	-820	-733	-454	-520	-78	-173	113	-184	277
1076	-228	-448	-418	-285	204	-142	-178	-351	-127	189	-314	50	-215	-375	-1220	-273	-312	2250	-235	-445	-186	-66	97	-103	-329	-185	-315	-385	-188	-376	-95	-670	-281	-95	-24	-315	-235	-235	-607	-107	-274	-298	-63	-592	33	-638	-285	-120	-453
1077	-388	-484	-314	-775	-348	-743	-348	-381	-564	-443	-242	-190	-297	-224	-1021	-390	-598	-647	-2190	-280	-316	-516	-439	-334	-582	-1486	-277	-581	-943	-946	-356	-447	-241	-196	-267	-387	-296	-593	-390	-246	-183	-336	-427	-224	-362	-299	-377	-223	-241
1078	259	335	-48	13	237	3	55	31	-5	-18	157	15	313	-6	-21	194	138	20	557	-6	-22	-27	207	-16	57	-219	-21	251	12	72	-4	16	191	-76	-22	44	26	64	358	115	48	115	100	117	-34	252	53	75	110
1079	-276	-148	2	-79	225	-133	-142	-122	149	-117	125	-195	124	236	-191	-167	355	-358	-439	317	116	-227	-299	28	3	-871	72	366	104	102	-84	-168	-106	0	-25	-34	-53	341	-70	29	-127	-222	218	-58	131	-173	-51	-152	-266
1080	397	1721	528	8231	2059	499	1240	3235	696	1056	1429	278	511	272	-327	2636	876	1120	1062	199	351	444	1275	1056	5019	3077	441	6186	356	1176	63	2485	349	730	336	311	1814	42	828	447	156	367	207	595	584	774	1033	588	595
1081	515	266	213	983	635	345	1090	1439	464	423	600	412	334	298	590	755	789	1313	462	573	301	201	1268	1001	922	1679	842	1134	808	429	1056	335	630	685	1105	653	1467	2002	2048	915	1366	1034	2533	1514	289	923	1135	672	1333
1082	-14	43	-34	-52	-144	36	-7	-121	-41	-67	4	-2	318	71	1250	16	170	-2225	-500	-83	-135	-53	302	23	-90	335	-176	194	-154	40	38	49	231	129	54	57	84	14	331	-57	129	-198	59	248	215	-76	98	146	172
1083	-650	-581	-619	-768	-1486	-85	-522	-297	-500	-588	-393	-345	-196	-557	-1965	-551	-96	-1358	-2661	-187	-430	-517	-877	-478	-259	305	-477	-380	-1162	-774	-698	-178	-687	-299	-318	-701	-430	-202	-1019	-671	-596	-444	-294	-522	-99	-577	-91	-467	-323
1084	-92	-52	5	72	98	-185	60	158	89	67	60	105	122	-9	-1345	-203	-230	1673	-285	-6	-19	-165	-2	35	38	618	39	24	-4	-51	-2	-168	21	140	87	34	-11	-3	-151	145	-9	121	117	122	25	103	228	39	5
1085	457	941	485	929	811	285	616	549	511	518	376	429	437	548	311	709	641	2063	967	431	620	474	448	678	475	378	718	187	867	689	1120	930	493	285	397	405	433	687	853	1122	790	852	515	638	727	752	374	730	527
1086	-88	74	-15	-142	-178	30	8	-150	-48	-1	-33	-4	-143	-21	-76	-119	-182	-1104	-127	61	23	-173	160	24	-12	-537	-58	-148	-165	-61	-183	34	17	27	1	-193	-63	-278	-18	102	-108	144	-61	-81	11	165	90	-143	-76
1087	-303	64	-336	-334	-326	-104	-167	115	-184	-23	-155	-135	-85	-160	1131	15	-54	-483	-1899	28	-215	-36	-296	-351	-369	1375	521	-131	-234	-391	-239	-400	-323	-37	111	-260	-263	-105	-21	-225	-183	-86	-136	82	701	-570	-74	-6	-226
1088	13	-105	-139	-104	-205	52	-126	-158	-124	-68	-106	-73	-109	-158	243	-7	-142	-230	442	-100	-96	-115	130	-158	-192	-285	-42	-47	-345	-152	-106	-283	-131	-34	-41	-125	-103	-97	-426	61	-200	-295	-156	-132	-91	-240	-167	-30	4
1089	-7532	-5799	-4705	-6225	-7355	-4288	-3996	-8524	-3949	-2724	-2847	-5972	-6031	-4811	-5885	-3828	-5025	-77242	-63878	-478	-3816	-2593	-4186	-4104	-4890	-697	-3733	-1755	-10699	-5741	-7779	7535	-4246	-2866	-3063	-4043	-4222	-1539	-10189	-4218	4662	-3535	3743	-2065	-3268	-1285	-2589	-2672	-163
1090	1351	1252	901	1055	1440	1079	869	1064	820	709	196	832	1064	1089	-237	1197	538	1369	-55	470	548	753	580	641	779	102	1266	898	526	1357	1458	636	771	414	397	947	1028	1787	1925	929	765	612	261	437	756	867	525	704	623
1091	-91	-30	-48	-22	-135	-18	-16	-19	-65	-94	-38	6	8	-68	-168	-86	-85	-743	-561	-101	-16	-96	-48	84	-53	-42	-91	-63	-242	-41	-201	-26	-41	-70	5	-89	-133	-39	-88	-85	35	-58	-57	-54	31	128	72	60	22
1092	-491	-344	-102	-615	-245	-168	-268	-312	-259	-310	-223	-272	-215	-224	-983	-348	-636	-3752	-519	-125	-199	-440	-132	-143	-273	34	-304	-471	-419	-393	-523	-408	-220	-139	-44	-56	-253	-426	-524	-523	-307	10	-179	-176	-110	-92	-131	-327	-142
1093	183	107	147	288	181	265	92	364	171	247	24	107	105	118	1123	387	132	445	-445	159	170	116	207	157	-100	210	176	129	-82	246	198	314	36	93	57	156	162	361	59	190	11	71	166	155	145	-70	-12	124	-73
1094	-52	-133	-6	-79	410	-110	-44	-92	-11	10	37	-27	-269	-162	-461	-227	-203	532	-695	-1	-16	162	-52	-47	98	123	55	-133	-285	-272	-224	-146	21	0	2	-12	-10	-313	-233	-88	-245	-54	10	-6	40	-81	59	-23	-52
1095	457	1188	591	422	319	736	273	805	422	735	703	717	236	589	1042	907	538	379	342	813	463	579	731	389	564	782	503	1565	457	1117	520	1733	667	996	1239	934	540	814	588	768	845	1392	924	534	1741	2278	1049	371	566
1096	-184	-159	-188	-219	54	-153	-102	-149	-192	-126	-13	-25	181	-158	-371	-122	-380	-1989	83	29	-119	-57	-23	-89	-223	-30	0	40	-262	-328	-97	-168	-141	-29	-41	-158	-168	-98	-182	-3	-20	105	-89	50	-50	-51	69	-23	-66
1097	-18	-1357	-459	-572	-515	-293	412	-672	-205	-781	13	-487	113	-229	137	-167	-514	-5926	-2112	-52	-456	-784	-1046	-485	-127	-607	-373	52	-1700	-872	-1550	-998	713	-83	-353	-710	-245	-91	-1215	218	-341	-326	-275	-113	3001	-812	521	674	-414
1098	-55	-314	-203	-273	-182	-270	-138	-422	-405	-44	-243	-133	54	-83	-408	-78	-248	-1225	-3	28	-272	-209	-51	-229	-240	2301	2	-99	-66	-119	20	-194	195	-15	-135	-146	102	-254	25	-47	-171	98	-141	27	-3	-151	-37	13	45
1099	238	378	458	284	-129	282	240	226	404	308	319	259	146	348	1059	177	159	623	522	220	408	285	191	116	375	-305	366	564	657	454	343	160	-27	143	187	221	204	374	85	244	229	271	153	143	490	370	230	151	215
1100	234	586	71	123	430	151	42	-63	47	142	126	35	175	134	251	11	232	-396	-469	181	-35	150	154	64	49	-81	91	-39	419	198	248	79	116	57	79	172	146	192	2	343	71	42	130	136	28	249	-37	95	90
1101	-59	24	-35	15	-54	11	40	-85	-36	-101	-19	-19	42	18	957	74	-207	1707	424	-37	39	-38	66	37	15	-136	-39	38	128	-57	-28	-15	35	27	-26	-6	-19	-152	25	63	-9	78	-97	-217	3	-140	23	-57	27
1102	692	854	726	1827	625	538	750	746	364	779	535	572	788	396	135	968	1055	-484	1045	263	375	860	1302	309	912	952	568	423	648	915	1089	811	983	574	537	443	525	231	806	772	437	448	350	819	371	513	344	1606	559
1103	294	128	310	1122	900	108	960	1002	238	331	785	115	193	119	-330	654	427	1248	414	308	123	217	498	505	841	631	674	649	300	65	220	288	267	1585	840	195	127	1028	302	67	502	780	1275	977	467	646	1170	408	955
1104	731	363	607	1194	658	671	949	1101	408	526	491	233	319	364	1150	1311	1152	589	112	97	125	328	523	550	2030	369	686	2134	311	264	1040	909	380	802	558	277	442	1605	474	557	756	820	1437	950	433	593	1000	502	720
1105	-35	-25	56	38	89	63	195	56	33	-11	80	-5	-6	21	-211	165	89	601	-76	-18	-42	26	12	-30	44	58	33	386	-67	-3	4	38	74	127	159	-16	-30	286	-111	58	120	115	201	203	37	93	155	23	203
1106	174	255	113	350	11	108	163	378	539	444	822	85	84	75	308	234	28	20	-108	-28	-202	-9	3806	568	1199	-59	-259	2183	1823	26	159	220	1073	3080	1477	1156	448	291	1011	365	517	2040	602	328	183	613	1415	-60	728
1107	2595	14532	9298	5997	4264	4400	8122	3885	2354	3786	4116	8262	2998	1479	1300	3186	2146	1913	60	1200	2026	10250	19850	7261	5488	7889	7555	15936	10326	1894	5328	11434	6414	12492	5753	11147	10429	5742	1575	10910	6318	11854	7423	5338	16400	8646	5144	4341	3447
1108	207	202	142	176	267	243	187	282	137	-44	-41	106	-44	255	1006	200	200	832	-187	6	67	152	15	104	-106	-60	116	120	814	334	223	320	16	117	-4	-11	195	130	296	142	302	203	230	99	150	11	-63	190	93
1109	-351	-355	-283	-447	-312	-1496	-512	-322	-270	-291	-227	-219	-292	-160	-1520	-130	-403	-1024	286	-166	-310	-148	-234	-328	-295	-304	-325	-242	-679	-355	-292	-268	14	-154	-209	-330	-283	-626	-247	-220	-244	-183	-173	-317	-1264	-396	-186	-115	-163
1110	-231	-244	-141	-162	-183	-86	-96	-28	-81	-179	-116	-152	-255	-87	784	-98	-234	49	359	-162	-178	-102	-87	6	-170	-215	-145	-140	-199	-220	-197	-176	-164	-307	-105	-149	-120	-91	-25	-110	-157	-20	-83	-295	-68	-197	-80	-123	-105
1111	426	319	746	589	52	346	659	156	701	578	198	778	177	1212	749	960	770	-851	2872	455	442	271	729	51	-73	-2998	1083	216	-19	719	855	567	345	306	85	-150	1064	694	-349	86	281	-23	189	1147	172	-176	221	543	458
1112	701	644	489	626	723	626	929	698	462	459	315	552	596	373	2329	328	666	759	970	375	364	630	400	249	293	2693	254	823	1193	885	841	601	561	288	293	274	773	297	386	478	416	445	417	565	472	522	305	415	401
1113	340	271	158	355	237	246	254	255	217	200	161	182	111	125	-1123	306	65	1067	643	112	138	84	266	475	184	293	101	169	415	356	114	281	303	435	11	202	163	92	292	224	140	114	87	251	203	142	291	185	105
1114	6830	12047	3094	8567	14470	13870	8086	9224	10209	10891	11311	5873	6559	13781	3195	9815	20183	5697	6204	14160	6404	5733	3570	11048	10400	8861	11418	9060	8187	9578	4040	11512	5118	4588	4533	1014	5913	8416	7448	4009	7727	14551	5517	8767	7580	2064	6128	8457	8013
1115	3252	1826	2862	1144	2835	4807	4811	3523	5188	1686	1989	1355	407	2592	281	1934	4018	7365	10785	1841	1803	977	185	1010	1766	1222	2672	1238	272	1083	884	2465	577	1108	939	41	368	2686	323	1053	2636	4699	1804	2780	978	277	441	1344	1592
1116	20806	13417	12464	26158	23644	20027	26898	22000	13889	18598	12290	13898	16014	17591	7959	21673	30118	17307	29074	18396	16169	13802	14178	22181	26018	19052	23155	17888	8675	16754	18413	20580	11818	13615	12239	7200	18992	16443	21495	12503	18725	19172	15842	17360	10451	9835	10508	12209	14396
1117	684	396	595	346	356	270	819	550	90	403	350	366	310	704	1021	556	430	4496	584	1182	802	335	547	464	862	1859	583	476	40	223	735	648	867	671	790	202	633	401	407	213	454	275	322	156	761	1023	515	720	824
1118	127	172	39	167	119	169	197	132	70	43	119	53	104	-5	-353	147	-16	506	607	48	63	121	212	252	221	132	79	168	466	199	76	193	151	60	84	198	184	121	86	98	72	60	132	123	107	140	68	55	39
1119	-47	-126	-19	-56	-10	-66	262	-107	-31	-32	-1	98	-63	-114	-794	36	-134	-33	-180	-85	-57	-4	-73	-65	-51	-30	-67	-146	-88	-227	-142	-63	9	4	-73	-56	-61	-143	-113	-147	-106	-90	-219	-91	-14	-179	-11	-41	-84
1120	46	-52	35	99	-61	-8	125	6	29	24	64	81	62	0	830	198	6	408	152	39	72	-1	2	143	48	388	34	83	63	73	5	44	177	41	41	6	40	82	112	90	8	22	130	52	-100	55	90	27	17
1121	161	117	283	107	197	524	246	233	177	225	215	385	172	493	475	199	43	1691	1208	421	294	561	283	213	333	395	156	232	460	316	162	189	117	216	153	342	79	108	154	127	98	184	118	415	520	150	181	169	106
1122	-150	-21	116	-125	-70	5	222	140	-9	-61	2	-19	129	139	-687	262	-114	1095	380	-75	86	88	20	62	-13	493	-149	54	399	121	-83	15	93	-37	-21	32	-19	101	272	-194	138	16	-76	66	184	279	11	-54	87
1123	3116	543	3128	189	1259	2411	1587	1173	3321	950	2317	2667	182	2322	945	1306	567	1374	1768	2454	1778	1579	331	686	2834	-540	1083	2029	142	233	2037	1817	424	2850	2549	523	1034	1323	369	1554	1457	2063	1772	3873	3663	1096	1383	3090	1792
1124	752	667	482	518	841	470	344	431	527	645	442	437	476	482	862	1051	534	649	354	480	416	661	456	736	699	379	630	566	662	792	418	427	706	563	300	697	675	339	668	342	474	558	534	578	673	853	585	415	540
1125	33527	22707	18729	16770	14044	33080	26442	18339	20147	12955	14791	15027	17423	30767	25781	26086	29783	20054	28649	30690	23001	12831	22727	12643	21064	7182	22361	19755	9559	16292	33951	29081	25927	13092	23029	13855	23177	31021	43254	51156	32455	21227	32066	45975	11380	53821	31679	25805	37870
1126	452	432	254	260	238	695	481	638	1065	437	812	887	455	694	1019	232	439	1625	878	-12	1004	737	1095	443	1347	760	568	418	1273	430	632	646	741	1147	964	426	544	468	206	989	656	1233	996	708	344	699	1218	212	327
1127	-17768	-12431	-10558	-14922	-20110	-12417	-11556	-16112	-13280	-8211	-8551	-12275	-8495	-11118	-25788	-10740	-20424	-237212	-126314	-610	-7264	-9581	-8922	-8217	-10683	0	-17339	-9921	-21140	-14674	-19050	-9335	-11570	-5567	-8801	-2444	-11097	-13388	-22795	-11938	-7850	-8596	-4484	-5927	-8090	-9284	-6652	-10749	-8113
1128	-1159	-646	-432	-1407	-2092	-317	-643	-1707	-1110	-741	-279	-817	-389	-738	-2881	-1496	-1254	-11543	-10740	-469	-376	-714	-1097	-388	-7	844	-937	-475	-1776	-971	-1397	-1319	-741	-459	-443	-904	-884	-383	29	-771	-962	-702	-556	-857	-511	-80	-450	-644	-486
1129	2219	1338	3112	2518	3406	1573	3460	4068	4383	1721	2265	3324	1246	1405	1015	2036	1673	3791	2259	2140	1940	2406	4471	3065	3764	1747	4269	7823	4251	2804	2752	3034	2820	5057	3701	1416	6415	4807	521	3511	3514	1687	3086	5648	2482	3621	3847	3200	5645
1130	3027	1353	3385	3058	3324	1843	5189	5179	5085	2361	2821	3852	1567	1905	2110	2660	2197	3039	3143	1999	1798	2416	4433	4628	3800	1983	5174	7837	5271	3550	3406	4221	3836	5861	3667	1663	7285	5450	709	4330	4135	1799	4294	6297	2795	4664	4455	3730	6140
1131	-4	-26	-14	102	224	128	88	96	74	26	31	-39	-24	35	996	83	149	929	262	-10	20	33	484	207	56	90	7	130	1	23	46	52	50	14	11	97	-37	-13	99	-23	47	18	59	48	78	327	64	63	25
1132	65	230	1704	28	191	259	142	270	371	41	46	154	24	519	701	105	151	-14	203	-123	1238	394	397	225	115	38	409	181	-3	93	113	2415	16	1277	224	-53	407	207	-72	44	302	621	597	406	220	7	372	23	-32
1133	190	235	2654	177	621	499	218	946	565	97	47	346	266	4048	113	478	736	1029	930	-62	431	217	305	270	100	1056	341	80	182	379	411	4451	232	878	227	-5	615	309	63	268	634	1186	501	683	576	10	681	95	100
1134	-251	-466	1060	-59	-78	4	-197	447	140	-119	13	-149	-13	931	-1260	-34	-119	-1486	736	-222	59	101	185	-100	-42	-3060	-126	-199	-47	-358	-402	1225	58	467	55	-60	21	-177	-214	-168	-6	261	-70	173	160	-83	178	-269	-31
1135	92	77	156	36	53	92	99	29	55	161	95	68	126	43	478	106	203	379	-21	86	79	164	344	286	202	1024	64	127	117	205	99	11	12	13	39	189	99	182	-174	209	46	-35	132	3	345	36	175	53	44
1136	-5	470	109	-173	60	176	-225	-163	-40	-100	-106	194	232	381	972	400	764	197	-990	45	429	-66	473	80	139	-60	-155	510	739	119	35	-371	34	168	196	-246	62	393	105	207	-12	190	44	-23	78	428	396	-181	186
1137	436	459	364	1638	490	492	1347	1067	237	3075	642	438	1220	460	-432	2496	1416	1628	858	322	561	694	210	2595	2507	357	489	295	2733	226	574	237	1150	2608	1898	472	221	1086	12111	367	185	656	1587	1094	-56	994	13	424	4255
1138	-3	-34	7	109	-299	46	90	10	21	32	34	-12	102	54	419	138	373	-70	63	-22	32	145	88	52	35	931	121	-71	175	-33	108	180	68	-14	-1	4	2	79	239	50	77	43	144	90	58	96	72	91	67
1139	-1563	-1114	-1158	-713	-1817	-447	-577	-1300	-470	399	-145	-391	-775	-785	-1384	-641	-123	-2155	-5563	-167	-501	12	-418	-761	5	-4720	-778	-1332	-1622	-1073	-1122	-505	-62	-176	-21	-83	-948	-350	-545	-908	-75	-248	-501	-130	635	-495	107	-321	-179
1140	1021	-278	581	2418	1347	1964	705	-120	1219	1586	1060	1097	2669	2876	2913	3985	4390	-12724	-9649	1616	490	782	809	82	461	1030	4185	289	3741	14	3462	-295	2531	1765	3079	331	4285	3205	3407	3221	672	894	3087	1966	3499	2370	2230	2575	3078
1141	1419	2046	3416	2237	1171	788	2870	2606	813	1243	2034	1495	2343	1858	3338	1996	2371	1670	2728	1453	761	1233	2155	1706	2130	-3270	1917	2221	3300	1635	2304	2683	1601	1365	1389	3127	1715	2135	2577	3228	3180	3092	1181	1690	3218	2222	1526	1545	1862
1142	3564	1544	3448	5097	9322	2089	6119	10500	4643	3828	6446	2642	764	1322	3350	8245	10146	2791	2710	2457	891	1285	1222	6976	14142	3468	4248	3555	163	601	674	5752	1951	5890	4191	706	4664	492	438	655	5978	649	3229	8913	4615	711	3156	5570	5231
1143	-166	-400	-196	-362	-180	-288	-269	-327	-315	-152	-142	-254	-113	-132	-827	-523	-208	1806	86	-188	-206	-62	-39	-146	-87	-346	-160	-182	-725	-299	-291	-121	-233	-87	-82	-215	-286	-387	-711	-476	-183	-224	-351	-235	-82	-192	50	-264	-211
1144	374	515	240	190	454	319	349	238	257	402	617	217	156	330	550	157	448	370	560	247	206	344	722	304	447	802	256	172	350	190	546	235	346	457	506	150	252	228	202	430	492	236	305	401	260	266	244	373	378
1145	1358	1617	2429	1460	2480	3253	1557	2242	2528	2523	2726	2263	2772	1785	1075	1251	1809	846	3800	3725	3137	2791	3014	2788	2823	1045	1489	2477	1784	2725	1713	1064	2486	3355	3030	2314	1700	1403	830	1238	1982	1470	2179	2797	2147	2394	2891	1377	1530
1146	11	27	11	-2	-118	-1	63	90	-47	36	22	-22	5	12	-173	-24	-70	1650	83	129	27	28	1	30	-75	63	-89	4	-18	-61	17	15	-134	-50	1	-128	-33	67	-62	37	52	-23	48	6	60	-172	-4	17	-44
1147	89	28	121	-73	217	175	16	-17	194	99	85	120	4	136	-162	-76	55	445	444	102	92	175	598	155	93	141	32	175	165	33	130	110	56	399	64	248	162	143	121	5	91	136	182	117	129	131	212	87	40
1148	-823	-1082	-688	-976	-988	-427	-1003	-1845	-681	-380	-153	-343	-470	-650	-2784	-795	-599	-6789	-5200	181	-281	-374	-768	-1180	-606	-1367	-381	-505	-1071	-941	-1143	-1453	-313	-168	-162	-334	-560	-310	-1634	-966	-465	-1064	-306	-395	-42	-411	65	-436	-209
1149	13	143	49	72	100	25	7	20	172	116	136	72	24	95	723	151	192	117	356	133	-10	13	79	165	73	56	79	-59	-36	-26	-29	27	22	37	12	147	64	-37	-7	60	-47	-10	3	0	159	46	102	27	-31
1150	204	-59	39	12	93	179	76	41	-29	269	185	-37	172	92	189	-88	177	2775	772	222	82	269	123	303	-71	1443	105	16	436	140	483	124	54	101	267	328	174	112	62	170	113	55	53	169	172	122	77	126	87
1151	6311	9495	12387	5795	5130	5797	3986	8175	8276	7383	5984	3532	3128	10595	2121	6985	9036	3845	3178	5204	14041	2707	3969	3923	7738	2569	8309	7320	7875	9422	10887	10754	3902	2838	8542	8489	3756	12722	8284	9615	7858	8965	5205	7511	4958	8655	8557	6532	7736
1152	-78	-70	-23	-4	-220	-56	-44	-50	95	-81	-1	-45	30	24	1185	66	25	392	-609	-70	-96	-122	8	39	137	-223	10	-6	-455	-14	-51	-35	-111	-4	-64	17	8	-88	-126	-57	-63	-43	52	50	-34	85	64	1	-26
1153	-69	3	38	-46	-247	92	-16	20	111	-75	-38	21	-145	39	-868	-163	-72	-1165	387	-99	-136	-107	-201	-176	-144	-204	-28	-12	167	139	1	-83	-129	-71	-20	-38	49	3	-184	-13	77	34	-65	-20	-79	-58	55	-111	-112
1154	-272	-240	-338	-391	-146	-212	-111	-303	-284	-310	-108	-138	0	-263	1009	-139	-491	-610	-791	-210	-426	7	-28	-31	-258	-468	-361	-100	-700	-405	-243	-296	-263	-44	-118	-237	-308	-538	-455	-554	-327	-393	-112	-222	-215	-486	-199	-126	-111
1155	-59	106	20	-57	-100	-226	22	13	43	165	-33	77	68	90	-600	258	189	-1281	-433	-136	-47	23	-3	-95	-78	258	30	10	105	-12	230	-82	49	42	-53	79	127	312	175	103	-76	-18	-59	73	30	283	-45	75	97
1156	377	234	472	176	684	638	139	458	848	251	282	257	407	774	1587	102	352	557	407	421	312	220	-70	42	213	1405	379	117	287	223	172	253	137	97	88	158	124	340	118	16	119	168	57	194	103	71	135	107	55
1157	-57	-39	-17	-51	-238	-19	-69	-61	57	26	41	-22	122	-9	463	34	-36	-654	-121	2	30	-86	120	-20	-79	32	45	-25	112	-67	-16	-55	31	3	-6	-16	-5	-43	-65	-8	24	118	-37	128	30	-69	36	12	26
1158	82	-153	-21	-16	201	-47	-140	-21	-98	-116	-40	-10	43	-80	162	-62	7	1779	102	28	-50	-24	47	46	29	259	-11	54	-267	-66	3	-72	-74	-9	-8	-32	-31	-35	-150	-16	-32	28	51	-39	56	-26	57	-71	-17
1159	84	-586	-237	-228	-325	101	-91	-399	27	-358	-21	-164	-201	94	326	-105	102	-3865	-2743	268	-229	-231	-574	-359	-435	-3708	1	-167	-968	-199	-143	-361	-267	-193	500	-422	-31	-152	-15	-85	227	-96	-47	1857	159	-268	236	5	-52
1160	224	-132	519	294	146	169	414	648	268	493	660	596	362	787	76	66	204	704	1155	652	299	343	477	944	362	535	-197	779	291	247	246	417	482	550	159	122	142	124	-123	44	17	251	398	456	572	379	254	601	307
1161	284	214	106	183	180	68	135	295	163	291	162	202	413	334	1503	441	433	1732	178	96	383	448	185	69	334	369	478	198	749	67	399	75	327	83	125	403	510	551	778	333	349	243	152	111	321	162	251	335	98
1162	629	563	599	931	797	226	563	354	426	616	591	511	1167	733	1840	1187	1602	3148	2433	421	316	899	469	364	505	3776	1253	527	1054	665	1366	616	612	94	309	598	676	1299	1820	736	823	556	402	665	414	235	438	747	532
1163	526	715	202	557	637	277	135	517	540	133	203	244	407	376	127	231	618	603	-267	103	59	31	139	368	361	198	603	422	983	474	167	977	346	219	29	189	758	1126	1125	501	282	401	108	438	247	459	287	314	116
1164	265	-20	13	-54	190	341	-9	167	94	161	205	457	144	416	-142	-75	5	4146	22	264	630	630	137	866	29	-239	82	-24	-13	138	391	-34	125	49	37	17	51	206	-68	76	148	138	199	100	85	147	159	22	190
1165	37208	26370	25867	10107	17360	33582	17116	32784	19428	16301	12523	23862	20594	34293	6956	28214	33618	72470	54108	22338	19437	14403	10560	16117	29531	14422	29231	36321	19193	17950	30302	26395	32169	11107	22368	9617	29079	53784	35429	52718	42049	22359	24664	37946	44798	67108	34556	17904	32100
1166	623	772	1013	939	512	-314	256	768	677	17	218	718	247	326	1308	483	773	153	206	159	426	138	605	324	594	-83	49	1382	760	1094	204	1223	582	2	245	498	666	1025	440	812	714	267	297	159	221	408	54	511	524
1167	321	238	101	-6	87	-82	95	98	-29	9	138	10	166	-30	551	580	432	642	-410	198	-128	225	253	43	125	166	104	-173	719	100	63	-103	164	0	76	132	8	227	-116	-5	179	-31	178	-113	99	-131	-43	189	190
1168	1533	1145	604	-109	928	1018	964	994	85	629	495	561	832	561	47153	2759	481	10072	4590	1835	365	537	2349	318	473	445	878	968	5673	1242	1274	811	938	497	769	391	716	401	1219	771	1219	732	3246	1307	1600	2190	930	400	665
1169	-45	-71	-39	22	-318	-19	16	-80	-17	-72	11	-25	0	-33	-444	-138	-65	-580	-175	0	7	-9	-44	41	32	2	-2	-83	-317	-43	7	74	-99	24	-26	-117	22	-39	82	-52	-5	-55	-68	-57	-6	-75	41	1	-54
1170	120	-3	23	-89	120	47	-71	-131	65	-28	-9	45	67	-20	-1106	118	65	-1267	-439	0	-10	53	-15	-78	-69	185	-102	110	-210	-19	57	-132	-153	-80	-32	31	215	-89	-394	-41	55	173	67	32	-69	-12	104	54	14
1171	126	151	-14	121	-256	37	21	-134	156	-71	-104	61	-214	-84	635	-85	594	375	371	-303	2	-170	91	-67	25	1130	70	259	148	347	-29	12	-333	-135	10	-60	-52	63	-263	-121	-110	-334	106	-144	-145	-219	-13	8	-44
1172	87	157	74	59	158	170	-70	44	38	-37	23	77	66	43	69	-56	93	-122	2	63	38	26	197	77	-20	32	77	59	113	261	128	-7	-41	24	-20	-61	-40	3	117	13	10	21	-4	41	106	36	-72	14	-29
1173	299	155	248	262	132	337	192	184	177	123	172	185	90	185	234	234	207	706	-396	143	211	90	208	165	200	135	141	180	326	201	236	241	93	200	159	78	103	217	341	166	236	231	53	56	187	315	228	137	84
1174	552	501	268	409	243	362	356	316	467	464	231	206	457	423	875	421	725	537	875	164	160	269	480	315	349	1268	403	244	498	327	545	444	385	173	243	634	351	492	646	142	415	229	318	329	285	125	348	582	343
1175	-469	-517	-125	-1015	-411	110	-218	-381	-325	-196	-228	-204	-285	79	-1428	-407	84	-2478	-985	-102	-195	-229	36	-225	-370	-643	-408	-476	-1170	-842	-386	-566	-197	-482	-287	-230	-418	-191	-1492	-390	-411	-435	-776	-407	-346	-155	-210	-369	-279
1176	658	815	527	455	422	609	393	541	-69	776	296	512	507	343	1300	1127	468	-6363	-4627	506	597	773	1267	681	752	901	434	582	2197	590	573	358	445	440	615	786	506	879	1183	398	465	515	120	732	387	1292	752	831	85
1177	167	82	-2	54	144	72	76	73	25	97	112	162	21	111	530	207	167	8	501	79	43	73	126	113	22	262	104	-84	23	-25	198	-2	91	66	71	34	131	-37	-298	40	103	87	-49	30	188	173	35	17	60
1178	-236	-347	-323	-320	-264	-225	-235	-361	-308	-363	-335	-213	-187	-341	-2405	-443	-367	-1382	-674	-295	-300	-406	-534	-506	-739	-416	-288	-333	-635	-291	-436	-631	-392	-277	-310	-347	-349	-251	-626	-480	-387	-360	-288	-207	-373	-533	-336	-443	-236
1179	9702	6871	17673	12378	9290	6694	8703	12851	11665	11131	10050	5966	15902	22862	9498	15762	11107	18126	13001	29648	18234	7481	10640	18978	14113	6390	9357	9582	13670	14998	17899	9788	6745	9250	15981	9903	19276	13288	23345	20952	21051	10518	6725	17502	18423	27574	17257	10758	13346
1180	-253	-174	-366	-199	-436	-260	-219	-105	-232	-150	-92	-134	-222	-255	-238	-157	-144	-1803	-245	-335	-275	-125	-18	-174	-149	-287	-275	-250	-269	-286	-305	-205	-137	-114	-132	-294	-209	-298	-555	-209	-148	-51	57	-319	-144	-300	-120	-182	-259
1181	-89	-85	4	-201	22	-43	-60	-1	-74	-112	-78	-68	-104	-18	-785	-340	-210	-575	-680	39	-35	-120	-231	-10	-146	-619	-28	-133	-421	-144	-210	-98	-206	-22	-40	-210	-248	-137	-331	-73	-206	-119	-50	-72	-25	-109	-134	-143	-73
1182	543	874	594	611	679	627	422	731	509	360	420	397	409	476	2050	471	475	3460	-2215	312	393	361	462	401	437	512	492	580	1013	852	495	988	362	320	314	461	545	657	752	447	570	632	498	406	515	581	486	403	389
1183	-721	-1288	-472	-773	-371	-845	-550	-1008	-259	-401	-429	-665	-602	-670	-2764	-800	-834	-4553	-2072	-309	-492	-394	-560	-725	-362	-1524	-591	-639	-1757	-1005	-830	-1057	-469	-223	-384	-430	-580	-666	-1066	-594	-788	-688	-557	-555	-576	-716	-448	-424	-413
1184	1067	713	1310	677	1332	800	1391	2353	808	838	1193	1096	924	886	1627	1978	1196	304	371	362	643	1026	1318	1031	1328	1786	607	561	740	955	909	575	574	811	701	3920	753	704	2712	414	589	619	421	384	755	575	1813	502	1008
1185	-91	290	22	-40	612	141	-24	0	81	123	349	262	-2	108	632	138	95	4215	630	182	353	152	613	80	345	-167	-13	0	290	63	-108	82	190	145	266	198	13	252	-52	-61	161	224	-6	136	129	378	316	154	128
1186	23	-151	-104	19	198	-8	-165	-95	47	69	-24	-61	-239	-61	-1317	-146	40	1036	-430	158	-37	43	-293	1	-5	-11	28	110	-330	-102	-289	-131	-167	-64	-26	-55	-96	-19	-104	-103	-155	-74	-34	-198	24	39	61	-2	22
1187	1624	1572	1270	1996	2327	907	1203	1341	1273	1937	1416	1238	769	1222	4619	1487	2055	6931	3868	596	1334	1552	165	177	737	9624	1922	756	3356	1320	2496	637	988	358	398	1628	1597	2764	1687	1284	1421	841	1719	1411	797	460	1021	1307	540
1188	61	-53	76	145	34	-109	20	-14	-114	-24	27	23	52	74	197	133	66	-844	122	133	88	1	24	36	74	82	146	-86	-38	64	98	-16	27	132	59	12	113	24	192	175	140	342	152	163	13	220	-3	-6	121
1189	18850	21103	25952	22210	10173	18691	12213	23136	22801	16780	8683	12271	10301	32734	6292	19615	22670	24997	27667	18659	20345	8670	14670	11115	23774	9698	21350	14671	37206	33950	24972	24740	22490	7634	10725	15321	20583	38527	46988	42978	38483	33825	19409	13755	17828	25658	19274	12516	20258
1190	-173	-197	-149	-184	-288	-168	-81	-324	-173	-87	-50	46	-155	-89	-679	-177	38	-1170	149	-59	-128	-129	-182	-121	-131	-605	17	-239	-398	-679	-55	-489	42	41	44	-17	-91	-1	-190	-161	-22	-159	-63	32	32	-122	44	1	4
1191	2273	1687	994	985	926	832	1236	1000	1417	1079	1605	1057	1168	1177	970	805	631	490	751	1150	1710	1213	2195	1241	1088	-668	802	1879	970	1954	1016	1612	1456	903	938	1603	1284	512	2333	933	1274	748	555	192	550	1276	1418	399	652
1192	-1020	-1064	-625	-1010	-595	-612	-505	-810	-691	-239	-606	-517	-538	-663	-1038	-885	-660	-2962	-1381	-388	-493	-450	-570	-454	-803	-1052	-476	-684	-1598	-875	-542	-620	-97	-187	-128	-472	-743	-539	-1179	-264	-563	-255	-364	-368	-539	-804	-162	-348	-231
1193	98	142	52	191	-107	123	44	19	99	132	71	147	33	85	795	116	-15	302	173	73	115	56	39	-7	72	107	147	49	191	54	115	10	55	55	42	44	-23	281	118	99	184	196	6	-46	46	-61	-36	43	102
1194	50	25	21	63	123	-66	22	99	48	195	175	15	62	105	110	291	200	180	-815	122	-177	91	333	163	67	-486	77	77	46	16	157	99	108	118	105	153	-64	188	-122	-95	119	169	375	226	162	267	183	221	94
1195	136	263	319	-17	-42	327	202	16	301	179	244	246	246	86	304	250	426	666	-516	72	160	324	589	177	267	580	42	657	-22	235	77	250	78	455	384	273	365	7285	487	193	553	514	110	270	242	336	444	132	56
1196	-63	39	95	-35	28	-87	94	52	57	-1	58	40	-63	-59	485	-24	-111	-78	149	43	32	-88	-30	32	74	-399	37	-28	112	103	2	39	31	65	60	-30	46	-72	-204	-42	25	43	70	30	68	30	194	-10	17
1197	96	68	124	133	-29	90	90	15	76	-38	42	22	141	9	215	33	177	1440	371	7	75	124	19	165	246	-43	20	63	-27	154	69	-10	229	221	250	125	47	215	56	3	96	-61	79	11	206	213	134	34	123
1198	813	1103	761	6571	3224	2587	4876	6707	943	3029	2256	855	1470	625	2120	6879	6746	5787	1450	853	1081	673	1618	4460	6503	3633	970	1256	228	430	528	3142	742	1375	1403	825	1299	-8	108	198	628	952	1247	2340	1476	349	996	1447	3559
1199	191	474	425	2	111	338	90	-56	424	96	51	19	-30	117	876	30	463	-815	-16	367	241	59	23	-137	-5	326	143	527	387	935	171	240	336	73	137	12	3	99	16	83	-75	32	161	202	110	10	280	115	284
1200	102	217	194	50	140	-5	70	71	155	93	174	75	578	223	-653	109	234	201	512	103	161	69	122	130	215	112	112	296	113	113	361	252	-23	74	215	8858	112	331	71	32	-2	63	238	194	11	246	126	164	340
1201	-119	-86	-11	180	279	22	108	-29	7	80	195	108	128	-18	-206	112	212	1037	425	-78	9	77	30	86	179	288	44	19	181	76	47	149	88	73	117	828	42	288	29	15	17	89	-2	67	330	297	76	2	84
1202	321	435	546	397	-46	673	319	267	176	280	160	173	489	187	678	403	646	6630	-816	256	234	216	102	433	209	840	282	387	862	449	450	446	93	139	96	338	317	251	229	289	376	101	616	115	206	509	256	158	251
1203	634	678	356	653	364	309	323	650	420	480	473	399	336	257	1183	639	748	2607	1212	268	522	281	584	542	358	1320	441	425	1050	576	584	900	376	339	356	276	568	904	1073	525	443	555	435	166	412	744	516	398	254
1204	-378	-361	-434	-324	-351	-84	-290	-197	-332	-525	-550	-257	-191	-158	-668	-161	-566	-1307	-736	-293	-487	-405	-770	-212	-279	-1804	-192	-490	-1131	-580	-699	-603	-157	-486	-295	-590	-253	-237	29	-378	-372	-282	-36	-265	-381	-1716	-28	-211	-332
1205	154	414	397	440	814	566	453	356	215	861	389	386	441	250	314	445	468	1082	224	398	698	330	857	421	447	-351	234	308	-42	508	158	200	334	522	299	799	185	194	91	170	358	83	474	333	228	375	238	415	367
1206	-21	2	15	-20	189	3	-34	-26	28	-94	-58	-1	94	-29	-168	215	5	355	193	46	-795	-38	-578	-70	-86	92	79	-113	-226	-83	-86	22	-90	-303	-4	-111	-69	-39	-75	8	17	28	-147	16	-397	-75	-117	64	-43
1207	2008	1723	1308	4279	3493	1802	1695	1738	1563	2440	1609	1563	2449	2421	5452	4220	3005	1924	2364	1872	2158	1986	2219	2880	3056	5520	2439	3386	4321	2455	3611	3946	1917	1413	1900	2424	3787	2717	6133	2518	3241	1959	2879	1814	2156	5376	1644	1454	1909
1208	1020	592	528	2349	822	669	2772	1116	2171	2032	1780	1144	3419	1799	654	1460	1423	1604	646	1260	3158	1497	4759	2445	3721	406	1290	3596	5237	623	1743	4014	3533	4875	3991	8898	9024	5684	4183	2123	12018	4113	5550	4632	3652	5812	7315	2606	5499
1209	-224	-240	-176	48	420	171	-21	-298	-212	-86	-176	-90	-147	-27	266	-145	-119	567	-1260	70	99	11	538	82	213	50	-128	-8	-526	103	-39	-475	-219	-85	39	358	-277	-208	-256	-213	-163	-2	147	40	49	-76	-40	-262	-93
1210	185	210	158	180	320	74	117	-19	93	-28	122	146	209	364	-717	39	21	-231	409	266	29	165	-169	-119	77	1935	-13	78	160	159	258	94	107	-31	43	99	146	15	-206	126	114	-193	-8	-21	-165	55	29	147	61
1211	205	162	221	2327	68	425	340	232	214	685	140	155	402	152	298	441	-21	1003	-246	340	183	214	354	184	813	6	-42	48	188	6462	44	665	71	621	27	115	73	57	154	-22	-106	549	74	19	885	275	143	321	273
1212	74	-19	44	10	274	-34	-16	36	22	21	34	81	39	23	-610	85	75	993	527	-41	21	33	-13	75	64	391	106	-1	60	31	33	-2	-47	64	23	66	40	-54	69	16	44	-10	-30	33	4	11	52	60	-32
1213	4874	4860	4518	3263	4414	3380	6359	7456	4759	5531	6240	8547	4064	6216	2113	3377	4924	5407	9698	5399	5066	8889	4549	8232	7593	3963	4275	5282	3103	4078	6541	5482	7927	11266	6703	3041	7230	3893	5106	7214	7278	6171	9736	6994	4079	4230	4020	4881	3176
1214	54	-134	1142	-86	122	-107	22	-16	23	204	142	99	159	169	1716	555	311	-972	-1593	67	-229	242	186	97	154	1263	172	329	532	-50	120	75	65	43	97	62	42	267	41	-101	149	418	1266	155	240	332	42	314	119
1215	140	71	213	280	300	227	427	654	461	126	505	366	225	580	-55	277	170	1684	872	539	308	437	296	332	273	348	256	165	256	56	274	248	121	447	472	37	235	736	63	261	338	686	234	358	453	596	333	411	254
1216	1150	712	903	302	1185	399	738	106	689	160	834	594	353	675	1198	731	1005	3261	2071	421	288	587	443	633	300	-208	623	436	444	459	2429	292	459	400	1194	538	543	1139	173	2209	968	401	435	1298	277	509	677	296	555
1217	1871	1013	1161	1689	2620	1371	878	1322	915	1445	755	1236	1395	865	904	1300	1988	1957	6373	1094	1578	1097	647	645	1213	3713	1209	1381	1473	1090	1504	461	1315	839	798	766	1522	1397	1368	896	867	703	1097	1077	1240	1042	805	900	380
1218	1006	617	422	9414	3243	1857	5209	4468	550	2659	1592	810	1493	902	8635	5876	4287	3516	9585	795	544	1314	405	1262	4634	2304	962	868	1615	1063	1013	1599	1027	742	355	7736	1240	567	5117	622	433	3845	930	589	559	735	423	764	548
1219	351	153	289	97	208	112	256	343	366	-8	186	397	77	392	-1106	299	-64	2239	258	-227	68	284	597	56	30	-59	256	60	-199	-110	177	177	119	373	338	78	46	82	38	98	134	170	144	137	574	284	301	642	114
1220	195	370	426	94	1058	370	214	73	823	449	300	168	204	101	148	256	676	744	456	355	408	145	163	508	194	681	126	-31	466	368	-33	55	254	84	33	598	239	-47	80	-286	-80	37	-83	332	163	-197	-43	273	-44
1221	21408	13870	20982	13573	14849	14839	15289	19885	18869	10887	9353	12569	15582	26725	13603	29251	22480	32676	24064	25526	19490	6432	11562	13935	14156	12630	20779	19415	7258	19732	25546	15562	7701	7957	15219	10790	14859	23627	36693	25856	21140	19409	13744	26774	30445	40607	12637	21886	25326
1222	-142	-936	-744	-1500	-1181	-693	-851	-1126	-563	-777	-616	-1350	-986	-874	-1374	-287	-1162	-5895	-1547	-375	-662	-164	-512	-803	-613	-4175	-977	60	-485	-908	-1963	-1471	-560	-462	-319	-537	-927	302	-706	-1086	-339	-641	-701	-619	-941	-883	-456	-52	-803
1223	307	358	238	-289	3204	450	241	-438	395	431	165	471	277	255	2995	59	510	-4266	-2118	331	355	504	62	35	157	1494	611	169	789	391	155	32	-38	-22	196	357	199	2169	-40	76	169	182	391	793	148	-77	137	579	79
1224	1082	1315	1075	1953	6529	601	984	1834	958	2022	1515	1263	1502	1169	2101	1518	2793	17646	11752	836	1353	837	1496	1077	1467	366	1475	1173	2485	1617	2824	1629	1497	870	1561	2485	1580	1741	2575	1901	1885	1631	1459	1109	1169	1789	1125	1237	819
1225	-372	-224	-16	-532	-727	-59	100	383	-172	2	108	-564	382	-159	1678	-44	-95	395	-215	170	332	-558	-90	64	298	-1290	-879	-29	268	-265	-1512	218	-92	175	45	73	-302	-167	-788	187	-815	586	-162	-231	444	-68	599	-179	-139
1226	2628	2927	392	3761	1664	2546	3316	5177	2806	1357	1470	2787	708	3200	2750	2721	2907	1469	1765	697	1306	1159	879	2619	2767	4968	7313	2649	5438	2896	1513	4007	1177	1042	3238	321	10789	5542	1266	452	5973	1151	3974	13102	1043	2166	7164	2188	7616
1227	140	571	190	163	107	265	171	546	530	337	660	631	128	453	1961	662	304	961	45	64	353	151	530	274	101	1158	222	156	492	439	764	669	393	288	157	511	360	581	614	408	294	345	422	324	51	318	338	330	279
1228	697	922	530	895	460	722	758	761	329	269	385	432	377	502	1832	1241	544	2668	1718	267	391	274	167	487	123	1287	314	607	1607	1272	871	1356	841	271	264	189	635	2659	1131	536	850	564	778	101	353	312	568	336	448
1229	3093	2360	5772	5995	6544	3304	10593	5231	5758	3949	3048	9574	3770	2378	2902	4882	3822	7633	9732	2405	3921	6214	8412	5390	8329	5506	5431	9024	9130	4611	4484	4412	5151	8167	6166	2214	11007	5608	1482	6737	6979	2877	11157	7872	6850	8972	6168	5372	9047
1230	99	162	61	92	-99	47	104	110	103	96	153	134	133	56	-103	134	-51	-122	-145	96	176	187	233	196	125	-426	159	163	-34	71	231	93	-15	148	200	178	-7	91	63	74	176	-53	183	195	106	47	110	-22	147
1231	411	-79	166	456	505	266	89	269	236	292	319	161	108	247	147	454	709	-199	239	190	138	397	335	-89	68	762	445	-128	100	296	424	458	254	61	247	324	266	363	563	102	195	86	211	110	143	77	147	207	250
1232	857	491	427	471	376	448	649	837	966	672	598	598	741	685	3789	1246	1088	1339	873	672	543	500	625	328	677	1899	850	417	782	338	1220	625	508	886	526	689	608	654	687	897	615	657	404	375	792	780	397	434	1284
1233	57	60	54	165	258	124	56	62	142	66	46	76	76	75	8	-31	123	1031	949	93	63	87	120	67	48	143	75	187	196	109	23	62	88	25	56	53	90	357	79	17	76	89	148	60	112	288	117	55	112
1234	695	330	435	769	357	380	574	407	569	563	565	635	291	483	1047	307	891	1485	1133	359	408	791	78	500	340	1151	1057	584	509	658	894	604	347	278	533	654	587	751	283	621	558	355	532	505	721	818	629	599	426
1235	611	98	367	1890	2496	356	1876	1715	449	1617	932	2592	1966	2184	1976	3020	2155	2507	788	4631	3770	1449	5126	4506	739	781	261	578	325	518	3866	1249	14393	7653	1225	5219	108	1581	1691	3346	1564	4298	4482	2229	1609	1779	4205	2809	4591
1236	-300	152	215	-56	-141	-22	-69	-5	176	302	109	137	39	136	287	45	53	-152	94	365	335	167	242	362	296	50	61	139	426	478	419	113	431	334	116	727	175	471	441	246	328	193	742	-224	124	480	475	-40	168
1237	131	115	145	89	6	122	54	123	81	94	119	87	71	97	-480	40	95	259	62	27	61	67	2	87	146	94	73	162	125	96	87	209	56	99	66	22	152	333	367	53	218	304	103	-29	269	157	92	72	149
1238	53	73	22	28	-222	-16	-38	-18	46	20	-74	27	9	7	35	-3	185	-1619	2	-86	-25	-115	24	-7	9	195	-8	48	184	136	97	-100	-44	-47	-81	-15	41	80	-47	-28	39	201	-7	289	-81	-18	-91	75	-219
1239	-612	-736	-1033	-295	-756	-370	-360	-448	-254	-361	-317	-343	-275	-364	-3259	-392	-845	-1497	-3024	-373	-482	-586	-492	-857	-628	-2252	-267	-587	-868	-758	-387	-682	-428	-277	-195	-455	-345	-516	-445	-352	-220	-384	-233	-216	-439	-432	-449	-509	-251
1240	-101	-131	-30	-68	-28	-82	-146	-123	-60	-54	-32	-144	-66	-38	404	-86	18	684	-185	-59	-91	-37	-117	-35	-98	-93	9	-70	-43	-73	-75	-46	-2	-21	-44	-111	-43	-105	-296	-57	-117	-138	-90	-59	-27	-172	-38	-107	15
1241	-2367	-938	-1819	-2530	-574	-1006	-2263	-2131	-1530	-1649	-1317	-1998	-1763	-1688	-1282	-1180	-1001	-10722	-11503	-459	-2457	-1463	-3156	-2619	-2773	1545	-1627	-866	-3164	-1503	-2999	-2433	-2592	-2568	-2291	-2373	-1853	-983	-2496	-1679	-964	-1316	-269	-803	-2464	-2931	-1850	-919	-1001
1242	2134	26164	1232	5506	21601	4301	5695	8969	4971	16999	10587	4369	8124	20797	295	18395	46663	-655	4795	4587	3827	2326	1375	24013	13164	1714	16182	1098	673	12701	2144	1595	5773	8465	3741	227	2707	540	1137	18730	8042	4095	5539	2946	6125	276	191	17715	5832
1243	244	65	304	48	255	83	476	89	211	240	279	-90	225	97	2504	626	541	1809	716	211	-11	486	70	447	188	929	228	511	458	264	553	347	5	29	117	253	215	378	337	0	416	263	369	342	-207	520	-20	205	114
1244	257	52	122	210	582	-21	133	125	149	53	105	147	192	95	728	286	-15	1870	1393	57	212	187	11	402	357	799	57	-42	214	175	304	-135	-31	19	19	76	168	310	-45	-50	-42	329	53	98	214	-31	235	90	62
1245	88	-490	-39	-22	231	113	-145	-50	97	249	308	110	61	90	-909	98	127	-830	-404	323	130	318	57	18	-153	1151	253	190	24	-262	91	-66	-410	155	195	254	215	-71	24	330	436	-73	199	359	-327	32	57	179	324
1246	-71	-74	-61	-266	-96	-55	-57	-148	-26	136	-133	-58	-178	-9	-1138	-68	-430	-1129	-1424	-104	10	-198	-370	-78	53	-225	-29	21	-193	98	-286	1764	-56	-11	590	-211	-154	-160	58	148	638	-87	484	73	-70	143	-253	74	2021
1247	117	249	-43	329	43	-89	-208	-353	-248	25	59	-76	-255	-119	658	329	-332	186	-946	99	6	191	-678	-137	-297	231	-16	86	-130	-81	-50	-288	-327	-88	87	39	40	-75	-395	-4	-280	-59	-35	40	73	-237	15	-232	-20
1248	-477	-372	-346	-483	-549	-248	-373	-396	-724	-415	-263	-167	-290	-378	-248	-274	-128	-2877	-1285	-394	-387	-313	-209	-261	-294	-6	-87	-306	-741	-755	-293	-603	-248	-206	-101	-194	-80	-188	-547	-217	-348	-260	-136	-65	-211	-331	-262	-244	-111
1249	778	528	341	390	329	83	353	390	307	348	286	314	410	322	2119	225	309	576	231	71	250	202	487	204	252	-137	446	197	751	212	450	148	471	270	182	355	653	734	666	410	480	795	238	325	388	478	251	176	73
1250	60	556	407	-92	141	805	19	407	195	703	5265	2864	185	961	-189	377	330	2241	63	1162	217	3394	80	665	465	-102	822	11	-296	48	179	585	18	529	122	-222	-26	217	-234	186	325	60	71	107	731	537	312	201	0
1251	-225	-237	-141	-49	-2	6	-114	-52	-117	-138	-91	-34	-56	-70	278	-108	-24	-1080	-364	-75	-85	-191	55	-102	-37	-498	-65	-28	-112	-163	-103	5	46	-76	-126	-208	-41	12	80	-1	23	-161	-128	-88	-48	25	-21	-57	81
1252	7013	11851	10936	4619	4358	14128	3151	9635	9357	6392	7618	5990	5173	5790	3130	5797	5557	11160	8617	6070	11195	4710	2191	3429	5276	6321	8725	8184	9110	6794	12026	4562	4493	2084	7732	6821	4526	8509	11688	9385	6480	6980	4162	2959	3759	7949	6425	2950	4973
1253	40	2	30	-45	283	33	-1	51	117	53	-22	-102	-12	-17	-495	94	149	-158	-150	69	-22	-29	-19	91	39	55	77	-56	45	77	-96	-27	-73	-2	20	45	-60	47	17	-8	37	3	75	102	-29	19	49	4	-97
1254	-183	-76	-37	-297	-64	198	-31	-213	8	-362	-129	-31	87	76	-1595	299	26	-2134	71	-4	-134	-62	-72	-54	66	-464	1	267	62	-200	-60	1143	-2	-200	-23	-128	-45	111	126	-112	518	-188	1820	-72	-85	73	-88	8	-73
1255	-631	-387	-147	-339	15	-104	-34	20	-229	-16	193	-154	-9	-55	336	295	336	359	1305	210	-204	42	-302	-88	-70	709	3	-527	-682	-388	139	451	-402	-3	161	183	60	-119	-112	-32	186	-6	123	-66	511	412	153	95	372
1256	46	77	49	44	-29	243	73	56	16	27	60	50	212	296	-461	147	91	-872	39	206	85	-78	326	161	73	-775	70	66	-449	199	248	64	-301	76	127	17	43	25	-267	125	-21	14	-128	-34	130	276	85	-32	-62
1257	-5	-62	53	-141	7	47	21	84	7	36	3	-7	-38	38	-42	11	-303	-665	-476	58	-50	-57	-8	-1	-8	-263	-20	-58	-13	101	-5	-13	-167	-22	-29	-11	-73	-27	-146	20	48	-38	18	-37	-71	64	113	-60	-63
1258	201	292	-156	79	-184	237	-379	195	389	194	89	152	266	-51	1191	479	728	-8178	-986	218	166	140	176	79	-506	-527	255	-131	62	-557	251	92	530	515	-77	119	506	471	519	224	289	42	286	442	102	-413	-31	261	708
1259	480	581	180	822	1067	372	397	404	303	290	191	252	308	185	1267	705	370	909	11	171	212	208	320	343	337	725	371	352	562	400	647	419	338	145	161	408	732	1039	1572	496	209	265	319	435	406	520	139	331	286
1260	-152	-275	176	117	-267	106	-91	-205	171	388	561	-179	289	900	-746	197	1360	5154	-1568	442	-102	-69	181	158	436	391	806	418	-199	170	90	-439	-35	190	121	144	-36	441	170	479	-210	165	-143	-242	219	182	237	302	226
1261	54	376	226	16	-88	128	-122	37	135	276	39	80	54	-4	1232	-90	203	-723	898	79	48	279	-161	50	82	189	114	48	288	243	113	-161	163	185	185	315	65	210	437	103	61	28	-117	-213	59	165	46	61	40
1262	-72	-20	-383	-219	-329	51	-18	-67	412	233	223	-373	-229	21	-945	-306	-149	1187	614	89	356	199	78	253	247	-799	17	-557	-431	-304	-555	74	-205	183	203	171	-62	-48	-532	-44	-295	15	-149	164	373	-141	-155	72	4
1263	-1454	-767	-356	-107	397	-347	-1149	-1390	-714	-91	-307	-336	-130	-364	2427	241	879	25007	-379	-83	-646	359	-759	-275	-91	6388	-107	-1836	-662	-1181	-724	-1542	-64	-680	-706	306	71	865	10	-1195	-1224	-1087	-198	-588	20	118	-275	701	-411
1264	-937	-878	-617	-523	-805	-872	-861	-993	-484	-382	-299	-774	-660	-380	-1164	-824	-479	-7027	-3386	-154	-465	-645	-383	-445	-283	-3977	-824	-986	-1354	-868	-764	-860	-458	-316	-315	-385	-470	-717	-1327	-556	-505	-254	-382	-621	-515	-591	-407	-210	-394
1265	-78	57	22	77	-124	-32	38	64	375	28	6	8	13	502	42	-23	103	-376	223	-36	-55	13	131	-35	-55	-6	39	11	-35	-52	-49	-6	54	45	36	46	-83	198	-87	-119	47	59	130	-121	245	99	-86	75	29
1266	544	399	366	515	1823	365	92	367	173	587	271	194	366	198	1672	290	88	12897	13537	347	117	771	221	255	489	313	-838	180	950	482	840	284	410	45	345	456	583	36	686	123	71	178	410	56	687	836	484	184	87
1267	311	136	233	88	304	33	59	109	56	383	208	133	-22	-26	-1525	200	68	-2027	-669	346	197	-18	-92	215	545	-468	14	187	531	445	5	-97	-171	208	178	269	11	122	149	70	142	186	213	168	293	182	186	359	260
1268	-242	19	-333	-405	-96	-114	-522	-67	-121	48	-299	-175	-298	-385	-1424	-205	-403	-2709	-840	-325	54	-47	-577	-434	-377	-1334	-246	27	-51	-587	-35	-16	-278	-134	-264	-247	-376	-215	-404	-387	-344	47	-22	-10	-160	-295	-75	-162	-217
1269	-31	-298	-33	415	-172	-168	629	544	167	-155	167	36	337	-154	156	147	68	-2389	-686	8	-19	-34	348	29	120	-87	95	36	-133	-114	991	417	168	12	960	181	288	638	10	1690	381	2489	202	320	-199	-99	488	132	409
1270	133	15	73	-125	426	426	-77	66	215	47	-5	234	65	168	-109	-18	62	-1183	-831	-57	358	-71	82	92	26	-1607	103	347	54	234	75	330	141	49	93	191	257	171	589	126	13	174	16	-156	263	113	33	-48	16
1271	-327	-83	-375	-450	-769	-480	9	-32	-397	1	-444	-276	-232	-62	1864	-280	-227	-2152	-720	-271	-206	-179	-547	-86	-382	-502	-282	-206	-317	-356	-218	-354	-307	103	35	-273	-239	-25	-142	-249	-514	-71	18	64	-226	57	-67	-702	-74
1272	348	212	269	276	310	300	144	331	224	325	169	160	251	180	817	537	381	70	1076	183	240	220	82	234	228	186	156	236	875	428	443	256	257	192	183	186	321	336	706	75	164	197	48	263	167	225	199	265	229
1273	70	88	135	72	209	94	145	217	133	99	48	126	29	121	-383	170	70	1046	1118	64	71	79	59	89	66	278	89	125	223	179	94	229	-28	81	14	161	127	57	181	97	89	211	52	136	25	136	167	116	81
1274	33	170	41	-85	130	20	9	-55	0	20	10	79	-31	0	594	-107	96	-462	-857	-45	18	140	245	101	-82	953	-6	-113	10	64	21	-45	125	81	14	14	-56	-67	-252	-129	-196	-28	-37	-52	-48	-31	54	73	-17
1275	883	-171	429	1179	836	130	-559	-1209	-522	516	216	-449	142	-519	734	937	908	-6831	202	162	-170	659	602	-376	-105	3139	804	674	2110	1059	-188	-1451	20	403	370	411	378	984	1824	109	266	948	206	452	-41	39	-60	358	316
1276	-108	-118	-75	-126	-291	-87	36	-147	-127	106	85	-54	47	-96	256	-125	362	506	-87	-6	56	71	-153	-21	-158	-634	-63	-42	-127	-48	-59	-16	10	15	-16	18	30	262	-112	147	-37	-321	-9	90	114	105	11	20	-38
1277	-82	124	-100	-586	-245	298	-338	-541	-106	359	88	-200	266	11	299	-285	329	-7637	-1602	11	-226	799	-315	-448	-269	438	39	-129	-662	-62	91	-809	-64	-328	173	89	-206	62	172	-238	18	-82	-34	318	-66	-402	-296	229	125
1278	4135	4222	2436	3569	9190	3811	3200	3805	2435	2471	2928	2837	2884	3416	13554	7171	7267	61260	41880	1907	1778	4158	1507	2666	3207	-47	4476	2157	6649	3722	3926	2235	1980	1486	1532	3515	2154	3974	8788	3190	3353	7132	5932	6428	2552	2470	2061	3637	2306
1279	-578	-383	-314	-500	-495	-151	-648	-565	-40	-193	-297	-291	-51	-83	203	-214	-251	937	1689	13	-1	-317	-80	-99	-46	-761	-103	-275	135	-252	-175	-575	-295	-111	-50	-110	-512	107	-756	80	94	-228	-316	-86	9	-137	-14	-156	-81
1280	-599	-872	-583	-835	-509	-584	-352	-897	-670	-514	-261	-414	-337	-391	-2068	-648	-733	-1295	-3126	-333	-410	-422	-454	-449	-592	-1621	-487	-557	-1295	-890	-503	-889	-345	-251	-233	-761	-467	-633	-834	-582	-647	-867	-650	-514	-387	-572	-128	-465	-345
1281	639	877	586	469	627	405	172	76	549	504	439	327	374	353	278	559	580	1618	824	413	555	602	296	37	502	1187	452	433	994	429	724	647	326	358	325	716	371	591	585	454	500	250	294	228	369	481	312	390	309
1282	1404	1550	1291	1605	586	1265	806	1067	1328	822	1140	956	742	1194	2804	1838	1208	2733	-177	584	1212	828	694	268	734	3582	1365	1117	1991	1585	1765	1310	1178	736	544	1237	1188	879	2189	1282	1237	1445	1201	1142	1012	838	208	861	794
1283	-1002	-534	-551	-755	-721	-617	-429	-339	-544	-501	-239	-475	-414	-475	-971	-584	-798	-3240	-1401	-184	-368	-571	-505	-191	-233	-1993	-600	-545	-970	-824	-842	-589	-439	-85	-287	-449	-463	-747	-772	-564	-514	-329	-228	-563	-644	9	-334	-558	-432
1284	129	392	441	-109	-86	332	95	44	255	62	111	-17	-6	-21	-1217	-9	33	-462	-570	23	104	54	44	95	-21	-26	26	263	651	358	394	18	149	20	-11	-26	212	-155	-164	-153	-6	-25	237	-86	53	-2	-119	148	-18
1285	-759	-1930	-643	-913	-1123	-787	-693	-1054	-918	-449	-256	-607	-810	-1064	-1685	-630	-1099	-5493	-2427	-243	-264	-449	-1303	-643	-287	-828	-425	-1280	-1852	-1949	-1314	-195	-329	-199	-165	-196	-860	-1224	-2885	-668	-569	-1099	-1083	-415	-497	-1258	-144	-265	-428
1286	856	401	719	1484	1179	888	352	479	419	907	414	475	1028	840	3992	1101	2304	2428	1846	818	573	787	624	349	917	3854	847	524	1149	400	918	1013	194	357	385	430	751	1306	1340	851	989	690	1183	629	92	1259	696	745	376
1287	568	414	588	534	35	379	440	271	376	348	306	323	155	234	26	601	152	722	-135	201	303	509	93	80	233	-486	414	405	523	684	576	573	254	269	229	464	467	198	878	672	403	525	146	174	263	617	435	227	96
1288	982	788	712	975	1323	595	639	751	588	1568	523	1209	950	996	3386	936	2234	8989	2485	499	429	1817	735	671	687	5418	865	632	1094	849	2237	2435	551	373	607	919	983	965	1429	758	1297	395	936	850	1078	642	571	1375	1238
1289	96	16	72	80	4	42	11	114	16	4	112	-40	-89	94	-330	7	61	-423	662	-97	-43	-35	-123	28	-20	761	75	59	189	-8	161	31	-2	-20	-44	62	57	101	-31	26	-80	140	-44	-62	-264	18	-98	-55	-8
1290	1037	3003	1319	2658	1468	2091	1014	908	1259	1213	826	1291	1475	1318	1778	2425	1704	3106	932	862	1375	1558	1066	984	1475	49	1349	1921	7815	4212	1532	1627	1604	1403	784	2230	1998	1944	4151	2226	2912	2423	1391	541	1146	1847	943	736	1282
1291	158	96	135	43	-191	-413	56	64	14	-193	34	-10	-76	28	4	139	-133	-4668	-1106	49	89	-359	277	-303	-111	-1306	44	208	689	381	107	60	-78	74	8	-52	20	55	453	43	165	288	80	150	-16	22	-407	-58	-100
1292	-177	-273	21	-187	-21	-31	-21	8	-177	-16	-136	32	-252	-432	1034	-147	-183	-1736	143	-99	-33	-95	-218	-169	-237	-200	-41	-35	-693	-144	-261	94	-58	-88	-156	-223	-163	-121	41	-113	-162	-72	-168	-52	-34	-165	-128	-178	-344
1293	277	263	149	546	133	346	80	220	34	349	149	29	260	98	-147	348	212	819	47	-7	-8	67	166	115	184	168	93	151	412	278	-37	81	242	85	66	80	134	186	-5	-110	77	583	255	345	38	82	204	102	195
1294	290	642	349	315	466	-798	199	416	534	491	230	409	147	300	1533	566	376	29	1070	332	416	461	386	456	590	949	489	495	878	555	566	608	329	351	168	494	371	744	317	224	389	460	353	198	249	602	417	538	536
1295	43	-6	102	19	249	115	86	12	59	101	40	50	15	53	-339	219	202	-814	262	36	-5	15	-89	60	30	642	107	149	217	126	77	34	47	9	72	146	170	28	180	180	-5	81	63	-99	54	328	129	7	55
1296	817	318	-208	118	1251	141	97	339	-253	-8	182	242	335	390	12	104	430	4197	3171	192	194	338	-32	294	-413	2893	311	45	-641	80	186	-59	406	44	-39	491	474	10	675	7	95	145	-232	54	408	-39	259	141	-202
1297	827	729	406	946	628	613	1177	996	824	506	656	686	519	230	1768	598	413	1036	413	135	313	374	764	454	1878	1727	876	1393	1450	1033	544	844	121	485	1049	464	1960	646	678	577	576	1839	1668	2301	421	667	2604	1417	790
1298	536	538	694	754	467	615	211	323	685	470	458	366	654	700	2	349	451	-385	716	764	566	528	449	385	606	294	426	575	1249	484	467	390	361	568	1937	1155	515	484	1159	656	681	712	683	418	635	852	544	696	456
1299	1210	384	339	196	24	789	489	500	529	343	499	157	152	374	-977	384	158	-616	929	696	304	400	373	282	609	457	120	646	575	515	232	575	373	856	332	594	623	333	539	626	515	965	1030	617	1292	437	867	919	322
1300	157	112	120	137	237	86	50	135	135	90	127	105	150	199	-329	-50	233	-928	199	246	122	70	-6	67	166	95	145	95	163	124	104	83	94	105	179	90	92	179	-31	75	73	128	94	200	161	114	55	156	102
1301	-388	-411	-212	83	-321	-85	-200	-88	-278	-96	-281	-249	27	-226	-409	-459	-188	-451	-478	-114	-164	151	182	368	-6	1314	-244	-17	-632	-429	-144	-435	-317	69	5	-61	-71	-232	11	-254	19	192	82	-201	220	-42	-205	-136	-192
1302	255	73	440	155	332	164	236	272	359	111	167	168	-2	218	97	10	176	-1759	65	48	63	221	95	118	96	517	222	134	416	290	123	212	34	52	171	53	48	271	450	210	121	303	130	201	229	162	28	117	20
1303	141	741	206	381	757	414	129	248	119	154	94	150	268	187	2426	380	582	1440	564	169	108	134	179	356	227	748	312	262	920	311	505	122	169	86	34	154	404	346	485	249	240	267	382	293	262	277	131	157	227
1304	220	257	56	191	75	122	115	234	89	90	163	150	127	134	-194	390	327	-1377	-559	125	81	197	25	-56	164	27	223	36	287	354	171	203	-15	49	80	96	257	165	483	206	150	271	265	193	260	220	138	98	136
1305	355	469	242	535	433	-49	520	214	253	196	291	318	411	434	-1206	155	1036	1681	-271	180	336	533	227	409	576	2464	261	418	353	627	492	218	240	145	155	441	700	693	607	425	497	277	681	387	145	183	256	328	202
1306	569	701	557	855	697	442	556	628	690	590	324	475	469	347	3027	311	798	2951	902	359	254	331	561	482	581	2352	618	413	806	629	713	525	467	396	349	615	817	500	904	500	460	517	294	518	277	663	8	458	311
1307	-25	219	127	-33	-90	200	-66	98	-11	19	31	138	-43	-59	-227	323	244	-2051	-950	120	2	30	422	38	22	-747	250	6	17	170	6	118	285	503	74	-194	-114	207	-12	39	32	190	292	174	147	87	-2	306	485
1308	-26	117	-2	-116	-315	-14	-18	-111	56	-174	-82	-136	-9	-44	54	-280	-106	473	-89	-116	-17	-63	-219	-66	-98	59	-191	-26	-66	-106	-123	27	-45	79	-40	-107	-208	68	-219	-98	-159	29	8	-74	-180	-315	-139	45	-35
1309	116	50	132	168	-531	186	325	224	204	23	47	507	-31	115	266	220	418	-58	-581	37	136	272	132	221	-26	-1238	157	80	187	358	151	79	198	410	133	121	249	111	164	74	153	200	298	284	230	-7	140	167	147
1310	162	602	538	410	1093	457	123	514	499	237	483	235	382	470	-310	332	414	834	258	332	453	594	646	120	928	500	276	735	418	494	270	511	172	323	17	618	1125	3612	1356	283	514	199	202	328	246	1468	401	238	247
1311	-122	24	-43	-66	22	-94	-9	-64	63	-23	-73	29	-98	-52	202	-132	-190	-1296	111	41	-28	146	-247	-37	-19	-672	-41	43	89	186	-83	-204	-77	-22	-8	-58	-59	-171	27	-68	-51	-97	125	-26	-109	-125	-38	16	-107
1312	-73	-66	-83	35	-135	-76	-108	-114	-47	-74	-40	16	-106	-228	-1262	-203	123	-954	-636	6	-109	-74	-67	-110	-111	-572	1	-68	-157	-122	-75	-103	-43	18	-90	-99	-23	11	172	-65	5	-7	79	27	6	-189	-72	-24	-16
1313	65	-64	524	-200	-45	18	-277	-224	-231	-273	18	-62	-171	95	3101	220	-229	3654	1258	-73	-103	-282	145	-228	68	618	-22	-155	-133	-126	-248	-271	-191	179	-31	-267	-71	-474	-566	-329	-237	-149	221	-197	-71	-285	-42	-165	-180
1314	-50	-32	3	-200	-267	-92	-150	-55	15	-32	-56	-64	-119	-65	-788	-109	-208	-228	-200	-56	-78	-4	-106	-29	-81	-577	-140	-74	-2	-33	-94	79	-75	-65	3	-39	-123	-132	-58	-118	-153	-13	-96	-96	-25	-80	-21	-73	-38
1315	94	146	80	51	28	31	159	199	134	174	80	182	91	89	121	-96	10	970	326	101	138	165	404	200	140	109	135	171	200	75	148	159	34	323	211	258	118	38	329	123	218	170	20	52	104	258	182	91	236
1316	-128	69	105	-100	-80	-39	-54	-35	126	112	99	-1	-41	-27	9	-122	-3	2346	-260	126	60	-85	-63	62	41	-549	-178	58	98	-52	-35	46	-106	111	28	-35	-50	116	-232	31	-114	-118	-20	50	-45	157	-23	47	115
1317	419	410	447	422	522	305	305	423	569	496	369	269	213	487	1413	199	710	-557	401	246	455	300	723	398	408	154	295	396	1134	545	441	439	117	270	209	343	396	336	832	275	259	308	273	315	554	630	329	419	351
1318	-64	-112	-83	-62	-137	-143	-16	-17	-82	-81	-62	-39	16	-1	-1145	-16	163	-473	-263	-69	-57	-28	-219	0	-63	-166	29	-150	-163	-92	-58	-65	-65	10	-23	4	-46	38	4	-27	-36	44	9	-56	-73	-47	-98	-34	-22
1319	5575	2877	4832	5386	5348	3828	8136	5498	4014	5356	4449	4914	5201	2593	1952	3141	6294	6140	5781	3538	2259	3603	6281	7527	7653	5456	8233	7758	4241	4800	2370	9288	4002	6277	3734	2968	7267	4764	1940	2893	10895	7726	9462	15455	2279	2901	5153	5602	5467
1320	139	-79	191	327	-57	151	202	529	302	55	33	8	69	56	1193	353	397	2312	1210	23	-6	-89	-18	-241	37	-237	111	230	438	375	-59	221	192	77	59	-184	321	-19	494	415	246	183	-7	211	288	137	-20	427	77
1321	80	244	128	31	113	114	59	141	163	80	112	52	39	88	368	205	92	-87	-132	18	171	99	276	58	157	-6	48	110	311	192	117	71	-1	94	59	136	107	87	162	8	52	115	56	109	170	153	129	0	53
1322	-480	-115	-330	-283	-484	-311	-415	-365	-183	40	-145	-281	-119	-199	-1399	-459	-116	-3060	-1562	-154	-108	-289	-363	-17	-255	-575	-160	-257	-832	-219	-107	-477	-140	-267	-134	-200	-142	-336	-773	-529	-373	-479	-271	-94	-271	-213	-37	-308	-260
1323	-47	-115	106	-601	-127	-229	-125	-174	103	40	-307	-79	162	-126	-514	-121	-44	-4292	-2032	-81	-7	-21	33	-28	-507	-208	-189	-75	259	-94	-243	-186	-3	50	-21	-242	-457	-420	100	-33	-435	-177	-66	-51	116	-207	169	-60	-162
1324	101	-138	76	8	646	28	80	129	91	-22	81	126	148	220	170	162	273	2460	982	-25	-13	61	177	139	84	840	106	75	485	149	169	294	132	14	17	-79	116	323	-84	-8	-156	218	113	89	95	411	345	193	83
1325	-434	137	128	207	326	106	81	129	74	109	26	92	93	122	-191	30	171	-1193	163	35	49	101	-85	105	112	-256	104	104	118	177	122	82	89	13	66	27	69	10	73	24	-12	-16	-69	23	108	138	-15	102	93
1326	830	205	11	1521	391	126	120	382	300	1266	289	375	468	225	255	2857	301	2462	843	382	306	310	449	-71	552	471	1031	516	1217	298	261	513	307	224	174	215	362	751	264	397	369	657	-68	280	3170	172	456	496	225
1327	-87	-34	-52	-170	46	-38	-57	106	-9	-33	-8	24	-32	8	-155	-33	-106	-124	259	-40	-24	-42	-97	-41	-14	-240	-61	-85	-173	-45	-77	-63	-44	-91	17	-122	1	-96	-166	-90	-67	-4	-62	73	-42	-166	-72	-19	-58
1328	-122	-358	-264	-169	-520	74	-84	-223	-247	-171	85	-74	-133	-218	264	-91	311	1718	838	-56	-86	-397	8	-40	-170	1192	94	-165	-580	-359	-435	-213	-116	-77	-28	-44	-320	-233	-467	-353	-93	-109	10	118	132	52	13	-12	-116
1329	-107	-190	-172	-144	-88	-188	-80	-166	-183	-157	-153	-60	-127	-186	-877	-259	-197	-175	-344	-55	-167	-210	-113	12	-211	-555	-114	-107	-473	-181	-148	-237	-133	-93	-115	-243	-97	-260	-414	-147	-53	-134	-66	-92	-144	-219	-51	-184	-97
1330	1024	642	501	2113	1297	737	1971	1391	1187	1334	1515	2888	3291	1099	2051	875	1361	2567	1235	995	1525	2329	929	1889	950	1602	1738	581	928	874	707	1256	1491	1382	1236	1711	802	697	309	982	1475	2004	1928	2318	488	308	618	1484	1398
1331	921	946	508	777	755	750	720	636	673	754	631	603	738	646	1080	735	631	2580	1943	614	489	677	909	750	512	1154	683	491	1158	586	717	1018	755	311	284	628	732	586	1341	705	453	409	522	502	609	778	500	578	388
1332	4	91	40	-39	21	22	-8	52	11	18	-10	48	7	12	174	67	26	163	434	23	1	12	91	-34	4	-133	-4	41	-54	74	24	72	119	26	30	82	34	-15	-55	33	-5	27	22	1	19	28	18	24	-35
1333	2060	5068	4736	335	946	3629	759	1325	1708	1852	1265	730	317	1263	475	1281	488	205	1035	1466	1558	831	1363	1552	1341	446	883	1278	719	875	781	887	782	1007	1101	705	767	577	627	1691	2449	1407	1905	445	1328	1422	1428	754	717
1334	-229	-172	-135	-210	-50	-173	-169	-173	-187	-340	-120	-119	-352	-126	-1438	-251	-269	-505	-835	-57	-142	-153	-297	-116	-281	-898	-477	-241	-993	-288	-219	-289	-186	-59	-94	-250	-351	-174	-327	-190	-285	-236	-108	-191	-272	-105	-14	-193	-105
1335	1822	1221	2256	1614	1838	1297	888	1502	767	1083	869	1289	1577	895	1686	1078	1812	1232	1389	1043	2048	1434	1471	1387	1769	486	990	1418	1258	1620	1466	1625	832	1589	1506	3371	1018	672	857	315	1421	544	1169	949	1001	2593	2707	1427	991
1336	-436	-314	-256	-402	-442	-287	-256	-146	-301	-302	-264	-176	-249	-258	-137	-327	-359	90	-860	-193	-254	-328	-72	-214	-291	-546	-94	-264	-719	-130	-455	-516	-158	-109	-154	-324	-343	-230	-443	-202	-296	-275	-171	-311	-276	-260	-199	-237	1
1337	461	479	331	104	504	468	310	249	646	56	289	332	354	409	826	440	639	2528	2415	224	165	128	159	334	417	-106	317	-163	861	438	281	484	254	209	101	99	51	722	958	138	499	198	275	462	65	370	245	361	213
1338	12134	18341	22537	12472	6960	18470	10226	18786	10399	9289	5415	4919	7344	13285	6206	14908	6667	25635	23474	10889	16175	2798	14215	13180	11091	4450	5847	13999	10589	24154	13339	24009	5542	9215	14149	12736	8173	8309	24819	20198	17764	12138	10889	16601	5377	43242	13596	8897	15847
1339	80	34	-38	-68	-150	28	-61	-16	18	-26	-46	-38	-16	-70	306	-37	-185	758	1468	-204	-249	-34	-104	14	-68	177	55	-85	-142	-31	-125	-13	-31	-7	-81	37	-130	-235	-184	-126	-205	-38	-226	-271	24	62	-55	-93	-108
1340	1094	1291	525	588	1052	2488	695	2297	259	862	1256	1700	831	555	-352	559	312	1590	920	561	188	2293	2327	985	1057	1973	1570	3572	-23	87	375	-73	1633	1455	1126	689	910	493	143	364	255	1131	976	356	1861	398	459	176	310
1341	977	995	659	1189	646	583	580	752	620	874	523	577	527	522	1248	504	784	2709	1355	286	326	656	957	612	506	4207	518	623	1384	895	1531	795	524	357	413	771	760	687	971	705	681	635	433	433	404	909	387	571	428
1342	-141	1	-199	49	124	47	-106	291	-41	9	5	-47	148	-63	-516	-89	87	-1190	-1016	47	-134	41	152	95	248	82	125	80	-41	57	-87	162	-135	96	67	-190	-23	-202	294	-45	204	7	-47	-42	141	201	-101	-86	20
1343	363	323	578	210	339	515	619	518	367	492	569	527	181	491	-164	196	331	24	90	296	624	323	709	357	329	-210	469	624	30	164	264	453	405	392	822	226	372	345	156	445	428	880	457	661	606	519	1598	398	628
1344	314	277	280	483	407	226	304	212	299	360	228	378	256	357	599	333	800	1446	406	187	351	262	347	475	438	863	335	159	654	290	708	330	264	133	195	604	695	598	840	464	540	449	463	471	398	358	182	256	126
1345	-180	-4	-28	-92	-234	-128	-115	-144	-101	-110	-34	-47	23	61	-235	-92	-168	-96	-170	-73	-20	-50	-11	23	-160	-244	-40	-121	-224	-244	-69	-253	-54	-240	-62	-34	-186	-58	-142	82	-180	-170	-106	-23	-67	-44	-38	-47	-104
1346	-66	174	61	99	111	39	-49	82	102	101	34	-27	338	-28	-376	282	241	-124	-21	209	529	140	-61	570	145	141	10	271	-107	3	-145	50	205	144	203	119	30	168	173	148	97	22	81	16	297	95	52	-69	186
1347	-425	-336	-400	-465	-90	-255	-228	-345	-395	-119	-285	-342	-325	-233	232	-146	-620	-1165	-1144	-67	-170	-201	-151	-91	-207	-700	-250	-239	-434	-476	-604	-512	-197	-127	-164	-334	-82	-237	-504	-257	-390	-211	-287	-74	-154	-179	-108	-78	-14
1348	58	106	-33	61	-28	188	26	51	-30	-29	-65	-35	-5	98	-14	315	138	323	-885	37	19	78	-209	-77	-154	-112	22	164	374	-39	-2	33	-9	-20	-67	-71	74	43	-43	-4	64	49	235	-12	-38	23	-87	46	74
1349	-290	-64	-241	-210	-112	-26	-52	-414	-315	-107	-91	-68	-102	-125	-168	-263	-120	-1376	-1279	-59	-40	6	-292	-163	-247	-1326	-251	-196	-508	-214	-349	-189	-200	-132	-67	-109	-172	-325	-579	-299	-130	-263	-83	-188	-133	-162	-9	-93	34
1350	-81	-53	0	-100	86	-133	-65	-92	1	-154	-83	-86	-174	-79	556	-61	-228	411	28	-75	-128	5	-347	-28	-9	-1011	8	-135	-65	82	-22	-19	-118	-43	-59	-104	-106	-92	56	-102	28	110	-40	-8	-139	-251	-113	-15	9
1351	-43	-45	-203	-72	127	-45	407	-119	38	-106	-126	-95	55	-77	-261	121	205	343	2755	-65	-125	61	54	-128	-240	260	322	676	296	130	-1	1319	-20	-13	238	-122	17	-9	222	181	2489	-82	392	-50	1	332	-59	105	387
1352	-58	-13	-100	-232	27	-36	-56	-23	43	-162	-119	-98	-35	-90	-129	-57	-167	-623	-457	-172	-138	-7	-113	-64	-13	-131	-107	39	41	-6	-90	28	-18	-115	-12	-210	-103	0	-384	-31	505	-138	56	-227	-73	251	-186	-52	-162
1353	-22	72	-5	194	56	-278	347	302	105	37	235	-133	-69	-43	-1420	298	395	-988	-1420	-131	-8	-92	-195	187	87	-1272	525	-138	-887	-296	-322	-65	207	349	367	82	254	99	7	659	85	1496	91	19	266	57	101	-58	329
1354	486	-381	189	570	752	97	114	288	205	426	270	281	120	260	277	-32	612	2694	-3046	44	85	328	328	393	677	4989	3	625	644	541	527	156	352	85	180	216	25	610	444	427	-23	132	224	276	192	209	62	241	129
1355	81	75	120	46	122	173	8	114	114	20	54	50	-30	81	217	167	211	281	148	-218	64	0	29	59	67	-40	64	260	51	55	58	77	334	18	36	-9	48	-20	-7	43	137	68	53	163	81	19	15	46	-40
1356	-219	-35	-123	-75	11	66	-142	-138	-119	19	-26	6	-89	-136	275	-126	-218	-616	-340	5	10	-11	-9	-67	-49	-88	-177	-254	-408	-122	-106	-166	-63	69	-31	-8	-94	-174	-141	-260	-129	-131	-190	37	-154	-7	-56	62	-58
1357	308	143	168	-205	665	288	-43	233	192	184	11	119	173	-44	1331	8	157	731	2101	223	167	225	72	298	304	429	163	237	781	186	247	113	-214	-16	232	276	-85	486	156	265	212	107	67	-124	20	158	45	169	22
1358	580	312	365	362	381	403	246	439	150	421	406	218	301	123	2009	496	268	702	557	316	362	354	365	-426	421	1046	250	402	673	367	310	467	263	217	310	445	285	656	767	282	283	296	292	154	573	694	352	235	199
1359	1193	1476	835	1048	968	766	1388	923	1007	873	917	1681	1074	849	2001	1086	1445	2342	2610	739	712	1795	1094	554	817	3288	1398	979	1451	1099	1244	483	965	630	500	2275	1217	934	1337	911	801	846	929	680	890	775	922	903	1029
1360	3164	4146	2516	2205	2535	2386	2148	2855	2964	3246	3833	2769	3496	2855	3891	2326	4033	1339	3057	2551	2540	4067	5904	3285	3417	5812	3089	5628	3751	4090	7889	2949	4066	7347	7286	2703	5788	3843	4695	4856	4485	1970	6147	4852	4198	5719	6581	1955	2599
1361	10383	7085	10759	5989	4773	7106	2428	5572	8440	4624	4689	3863	3869	15600	2657	7555	6785	4536	5671	6646	12231	3728	5037	3823	7303	4646	11956	8255	9986	9291	9328	3565	4482	4988	6559	10783	4111	18466	15429	8390	5308	7165	5646	4704	7091	14355	6298	5678	9900
1362	73	267	233	344	308	288	-7	140	197	1140	250	276	727	152	314	245	291	-1425	-268	629	467	192	751	1545	324	397	95	401	231	687	83	35	499	521	153	950	274	74	-165	248	114	71	112	64	162	272	177	405	407
1363	36	176	144	241	817	99	22	63	243	498	65	70	482	114	-1273	109	-193	1905	-23	-185	178	-52	296	858	-156	94	33	292	-266	474	89	42	342	60	-84	512	93	204	-76	109	36	-119	108	100	149	246	205	238	-1135
1364	-103	-128	-85	-50	-95	-234	-50	-185	-149	-160	-47	-116	-7	-31	-1537	-142	-212	956	143	-52	48	-155	-25	-49	-106	62	-77	-67	-226	-14	-287	-36	-31	-105	-91	-154	-173	-215	-348	-128	-201	41	1	-13	-33	-24	-80	-131	90
1365	161	295	180	154	172	110	243	77	139	29	137	205	166	146	168	159	128	376	201	63	141	192	121	88	207	89	115	202	164	166	102	24	96	282	72	83	213	185	189	140	88	260	246	136	106	315	101	183	151
1366	478	680	414	252	860	247	293	242	365	118	113	193	251	208	965	191	356	1639	2412	-39	136	184	199	226	101	1824	273	287	600	596	437	397	91	176	-26	223	159	231	551	123	263	78	186	232	123	185	107	319	127
1367	703	494	665	292	406	245	302	658	819	360	412	470	230	617	1249	524	465	1257	1799	321	600	474	401	226	344	874	713	325	209	406	495	511	731	490	670	234	325	1004	358	482	554	501	298	463	587	537	241	939	608
1368	1516	-711	-195	-744	1198	-188	195	160	650	475	620	1582	1363	2533	-232	324	978	-13137	-14323	1308	-24	1025	1540	247	19	329	1840	-527	-1173	-1035	540	81	4286	2235	2244	609	207	1752	1237	3026	-73	410	533	449	1015	1352	721	1783	1713
1369	1018	768	502	412	570	631	106	608	528	448	467	372	410	378	1243	526	928	1906	-43	220	315	340	388	369	380	740	454	574	1179	625	1039	639	494	121	233	308	391	898	1158	819	340	1148	347	258	1756	432	228	378	346
1370	464	1128	-12	341	-443	583	-6	-216	-22	150	159	-181	-174	629	-1209	-87	-1257	-3448	-2791	-63	-101	61	53	-396	-261	-4162	318	-189	205	138	943	458	190	-143	154	-89	-240	112	-297	324	430	-54	164	-637	70	353	-315	-627	220
1371	-204	336	110	-571	-49	343	191	-245	137	229	442	-17	170	298	-942	315	75	1081	1528	427	363	218	-62	114	395	-740	111	479	366	524	131	-64	366	522	280	337	195	221	-39	150	286	186	242	-74	195	306	250	378	209
1372	570	356	730	104	534	346	59	449	282	76	322	174	565	-4	-336	312	416	7411	6579	-187	87	431	181	330	649	-930	371	83	163	520	123	126	420	139	26	447	26	350	301	25	37	256	24	140	564	68	100	345	1
1373	115	46	449	-6	8	677	42	-17	-29	44	463	-26	610	177	460	279	1	534	1180	679	27	89	-151	-21	293	34	94	29	-4	650	6	-24	0	-11	17	-52	-6	115	-104	71	-53	-11	-17	-32	230	-121	35	70	-45
1374	441	686	338	414	445	267	279	252	432	496	365	1115	913	422	385	952	423	5838	3290	568	486	771	1009	539	818	1848	393	426	664	605	299	1111	859	699	412	759	859	1134	1256	589	634	670	314	974	579	892	891	738	317
1375	211	354	173	78	209	212	50	374	97	121	34	83	85	105	-169	97	298	338	545	15	42	75	10	99	57	-103	-128	218	362	242	-106	167	75	89	154	20	-55	40	405	162	138	2258	263	-20	-80	-124	95	38	108
1376	1689	597	950	97	410	713	736	748	1405	282	1474	1500	950	1025	-704	380	364	1497	619	455	1011	1192	999	477	575	640	1704	1299	1636	505	1403	1415	1863	3037	2404	1653	1646	1546	1896	1645	2114	2765	698	1756	936	1459	2736	1305	1368
1377	103	151	135	30	183	138	166	-73	206	-55	-36	263	4	292	1066	-312	-300	-240	-700	196	198	118	206	-83	13	-1985	-67	-206	-140	-142	161	166	-139	-143	21	25	-24	59	-525	-53	-140	-191	-18	-291	146	138	234	34	147
1378	-139	-180	-103	-290	-355	-197	-59	-98	-123	-9	-3	-50	-26	-51	-957	87	-210	-124	-252	-117	-33	-116	115	-59	-157	-80	33	-182	-372	-189	-181	-98	-183	-111	-87	-215	-59	-207	-195	-120	-124	18	-176	-192	-132	-316	-27	-79	-5
1379	-305	-305	-26	-158	-348	309	-33	-80	651	-138	121	2	-171	-29	-605	-166	-148	594	313	119	35	-63	-121	-272	-191	-401	162	-149	-497	-359	77	188	-271	28	100	-168	-285	89	-407	22	127	-75	-36	46	-70	-113	-25	181	188
1380	-133	-206	129	55	202	-147	168	-98	-142	-33	175	-60	171	99	791	199	207	-861	-13	-90	216	107	-46	233	205	1390	198	143	-20	66	432	648	-10	25	233	-140	249	-122	597	431	444	16	-116	-127	30	577	24	122	-132
1381	-7	581	181	52	251	653	3	190	399	318	920	86	-54	945	-469	167	101	1201	303	37	351	284	-122	241	122	137	37	60	162	1302	-25	4	-43	78	-85	620	15	-25	-38	-211	-65	-25	118	-110	1234	116	76	43	-474
1382	-1	130	136	115	-102	216	-168	5	-55	-3	170	-71	-160	-27	799	1	34	1321	754	110	-8	62	-162	-43	18	322	-49	21	459	-146	453	-196	-40	-76	91	230	-45	116	349	221	12	134	-7	-579	545	344	-91	-26	69
1383	115	-36	34	24	-165	-77	-55	-58	-52	1	108	-63	26	-95	-973	-49	41	-409	745	-105	17	-60	57	124	22	23	78	157	-78	-89	79	79	-127	-12	65	-1	57	-44	-21	-19	296	137	130	298	10	230	26	24	138
1384	53	71	223	76	301	167	91	75	342	-19	205	160	167	614	711	120	69	-816	366	319	52	83	338	32	-1	-23	542	81	-268	85	187	365	298	168	305	88	60	435	448	103	469	481	418	493	345	411	374	198	483
1385	326	195	8	194	477	24	324	298	221	-21	-158	-27	147	11	666	-14	209	602	-1688	113	-22	-117	119	337	134	2566	-96	-98	622	11	32	139	68	-5	181	116	406	-207	66	204	341	-70	216	-167	28	144	119	13	-100
1386	-1730	749	-831	290	-459	-1054	126	-1225	792	-354	-900	333	-145	-102	-3885	-652	-1	-7385	-2246	-1254	85	-118	894	342	-114	-5323	173	-426	-224	24	-647	-1169	-1033	649	119	-1351	2346	2324	-1489	-587	529	-67	571	2091	-825	-1980	-532	2330	-271
1387	7458	5046	14061	2157	3119	9419	3931	6330	10492	9763	7269	2972	6092	10221	1427	6008	3789	7821	9108	19715	13480	3164	7185	7111	10319	3328	4814	14868	5065	6511	11898	8683	3680	4685	12310	6633	5929	8017	5771	7643	8419	3558	9890	14083	4657	22424	6230	5185	7462
1388	-55	42	-28	19	357	112	31	70	-29	100	49	79	-82	71	343	113	435	448	-417	-22	-56	63	112	143	219	241	9	266	405	14	260	-43	52	85	-59	-29	-39	-65	243	29	19	67	38	18	98	37	-54	191	119
1389	742	755	296	440	658	536	364	40	444	1007	-399	640	431	421	1650	757	1091	771	-895	405	274	885	234	236	557	-1418	594	419	665	461	1340	-468	368	284	672	952	632	780	184	409	195	117	547	295	476	680	573	522	373
1390	349	205	262	320	368	45	137	20	168	209	236	262	240	297	869	322	518	415	568	321	87	337	100	75	292	1125	157	369	36	363	344	-189	116	36	321	223	142	230	274	180	136	41	205	277	180	137	190	304	111
1391	175	84	120	56	123	70	25	24	151	95	70	106	67	108	1367	137	-7	737	114	180	40	89	315	121	57	53	121	57	160	78	28	61	-1	87	138	105	125	45	-54	112	77	-13	51	109	210	114	269	130	159
1392	-52	-124	-137	3	-155	-34	-167	-113	-64	-30	-47	-128	-145	-92	448	-280	-265	150	579	43	44	-38	13	-142	-68	873	-93	-126	-123	-175	-33	-23	-183	-47	-14	-271	-24	-148	222	-75	18	-108	-118	45	27	-25	-95	-98	-170
1393	1595	1544	1682	1370	2264	2510	1199	1339	1366	1009	1664	1773	1512	1543	435	2175	1281	562	1568	938	1360	1804	681	1092	1089	962	910	1886	122	1073	1288	526	1248	997	776	1130	763	1551	2006	817	596	992	920	756	655	1070	1092	843	773
1394	182	86	220	-516	264	192	-684	-518	196	-54	132	333	-17	371	-838	401	44	656	1239	139	117	126	-311	-17	-30	-804	-51	-562	-874	-457	-364	-1945	180	-203	-338	-16	-71	290	40	-77	-2320	-48	-1778	-632	-16	-736	276	-473	-1112
1395	8653	7406	18835	8855	17708	7370	21784	15241	12491	7374	7245	19051	16285	5742	5547	7543	8176	15357	16203	7908	9138	8968	21974	14352	19406	8273	18150	28048	22085	11033	12896	10696	16884	16061	12003	5958	21937	16473	2184	17183	17382	4161	14187	10853	14821	19236	24101	11078	26262
1396	2815	1908	5098	4469	2202	2477	2812	3335	3494	6054	3350	2779	3137	4319	2328	4579	3278	2639	3859	5197	9272	4184	3411	4389	5002	4277	2384	3547	9241	6748	4970	4507	2423	2746	6680	8636	2252	5129	6934	2580	3930	3970	2569	5211	4998	6816	3966	2236	2309
1397	-117	-17	-31	-128	-286	-56	1	40	-60	-161	-58	-93	-82	-121	-893	-118	50	23	-224	-95	-87	-87	-123	-97	-64	172	-30	-202	-91	-165	-2	-158	-30	-19	-55	-169	-206	-129	42	-85	-61	-159	-69	-41	-115	-93	-142	4	-85
1398	-148	-112	37	-61	-433	53	-122	174	-43	-135	-20	-100	-69	-4	-257	411	-92	-2312	-3334	188	-4	-98	-173	-64	94	-9	-85	23	-79	22	-310	52	127	-14	163	-61	44	37	230	-138	-146	-87	-53	-215	-4	-59	-29	-60	10
1399	2078	1542	929	2195	2141	1057	1531	1917	2316	887	860	2159	1512	2473	2773	1140	1687	5650	1344	399	1187	1271	299	1885	914	5089	2781	1492	3074	1524	2035	1506	1284	1125	1328	514	3647	3825	1513	1083	2702	900	2344	3501	527	2191	2003	1260	3354
1400	185	82	137	403	331	61	309	185	84	289	220	128	187	31	1122	325	177	-653	299	61	78	234	224	182	143	412	317	211	371	409	357	271	328	91	127	142	377	295	314	246	41	20	132	293	138	256	262	229	172
1401	223	423	339	61	186	160	55	319	108	58	199	166	89	120	-764	-234	146	-431	416	-30	116	295	-76	532	-46	-68	71	9	215	66	155	274	476	125	-119	142	278	51	116	63	353	59	94	245	-107	158	89	-38	36
1402	44	73	-58	-48	127	-104	189	-22	10	-25	25	40	133	-13	1070	63	288	644	14	65	-5	-43	46	76	37	33	83	101	377	-24	31	-8	214	-30	6	39	-88	-13	312	85	70	-67	92	-14	-84	-58	217	104	-10
1403	-337	-36	87	-321	33	-96	-258	-229	-94	133	-155	-177	-186	-149	1400	80	-291	-798	-1201	8	-75	-224	-290	53	-83	383	-197	-83	165	53	415	170	-81	9	186	-206	13	140	-589	28	-6	243	340	39	-26	-77	-31	27	293
1404	-238	204	122	-12	-334	14	-65	-83	-12	-80	18	-127	7	-134	369	-72	-139	-549	-826	-8	18	7	-3	-17	12	-255	-81	156	92	98	129	-12	-150	-72	-120	92	16	-127	-104	-73	-141	90	-113	-105	-18	-49	-45	-54	44
1405	14035	10184	15171	8352	5955	9600	6782	10546	12559	9638	6696	8590	8019	13594	4885	11691	6415	17688	23117	16269	16050	8353	8713	10489	13849	8944	13029	9156	5673	14606	14750	19872	6316	5422	13082	9966	8851	12937	24299	11000	11061	8212	4628	14289	9339	18389	12305	7476	10454
1406	-414	-620	-478	-410	-514	-483	-161	-475	-485	-417	-263	-411	-217	-341	-1053	-617	-862	-1472	151	-355	-384	-551	-784	-443	-465	60	-376	-369	-738	-446	-488	-773	-308	-260	-239	-353	-307	-770	-811	-679	-361	-340	-354	-410	-202	-691	-176	-432	-327
1407	672	373	369	589	713	122	475	446	432	360	630	410	248	431	338	428	671	340	1907	217	368	358	338	378	609	1520	594	478	1049	494	661	492	417	214	246	523	361	825	627	527	633	517	441	408	516	229	386	362	210
1408	75	72	140	46	38	47	-10	93	108	246	114	-87	23	23	822	-87	146	204	481	154	240	86	85	1068	87	708	-13	185	452	307	-56	70	83	48	132	144	70	44	219	9	-65	87	99	-77	146	239	151	-80	29
1409	387	580	551	570	446	548	372	660	306	499	205	397	366	409	-412	419	358	2278	661	109	333	221	325	270	244	376	298	418	1091	263	332	551	401	298	205	293	352	449	691	420	244	366	389	81	111	615	269	209	223
1410	29	24	78	-46	-3	22	27	-15	29	60	83	-12	39	-97	-102	-27	-7	1474	100	-106	22	-62	54	15	-34	244	-24	70	104	39	-3	56	12	24	12	-13	37	80	-46	136	43	5	-77	2	-44	-10	-75	34	87
1411	-143	-277	-99	-388	355	-70	-158	-431	51	-339	63	-275	-198	-301	-92	-291	-629	-11	381	-360	-93	-17	-185	-255	-150	637	-588	-210	-708	-385	-465	-22	21	-183	-10	-172	-416	44	-347	-307	-264	-242	-348	-203	-165	-243	-101	-86	10
1412	205	155	4	187	20	75	88	-128	87	42	-82	13	132	-30	409	0	-97	899	-180	29	-12	52	149	-57	-223	-237	37	-44	648	61	253	104	8	71	-3	74	-91	154	215	25	-14	120	-47	115	45	-9	6	2	18
1413	476	1097	58	218	-5831	1052	-96	-58	65	477	-222	77	110	-23	3511	1119	46	-50804	-26719	229	-499	520	880	298	211	-2470	-206	475	2233	2007	872	420	177	388	1433	111	370	238	992	606	884	675	821	1212	165	464	82	1370	622
1414	-116	-213	-308	-352	-419	-278	-362	227	-76	-184	-136	-171	-145	-239	-8	-160	-164	-1470	-1118	-215	-140	-214	-347	-227	-116	-173	-112	-164	-449	4214	-395	-434	-13	-205	-100	-166	-427	-397	-375	-290	-38	-103	-414	-376	47	-277	-349	3953	-249
1415	324	352	201	486	390	181	348	342	231	181	201	179	366	377	1099	467	303	479	818	39	122	341	169	248	141	398	419	270	313	498	345	351	33	148	106	324	346	415	479	96	407	330	313	252	183	382	219	467	279
1416	497	1057	747	606	1072	1438	367	667	315	338	437	346	656	540	1081	727	500	726	1194	300	189	560	144	444	350	155	482	366	776	1688	159	419	110	203	267	308	675	366	514	287	405	248	883	221	238	841	335	160	269
1417	57	-167	-186	-215	61	-135	-112	-321	-48	41	-29	-70	-164	-127	-833	-153	-320	-66	554	-86	33	-164	-140	21	-294	441	-23	-283	-183	102	-344	492	-115	44	-98	-145	-13	-87	-570	-261	185	-3	28	-82	-93	-193	116	-112	-103
1418	-1855	-2068	-864	-2714	-563	-1090	-954	-3842	-1172	-649	-155	-520	-645	-423	-2479	-923	-1044	-5703	-4252	-89	-421	-239	-56	-630	-1242	-219	-595	-1090	-3081	-2653	-2569	-1086	-97	-344	-316	70	-859	-1479	-2742	-1120	-587	-770	-514	-247	-296	29	4	-203	-679
1419	336	597	527	355	504	338	190	482	493	478	421	215	348	365	573	510	568	2422	1021	426	245	463	544	181	304	773	485	366	826	472	249	376	452	315	260	384	390	404	512	236	246	352	253	210	442	532	163	199	212
1420	314	198	-33	-310	327	214	-20	-206	4	-55	-136	268	106	195	-1285	128	-469	-3897	995	21	306	-73	-65	-241	-160	-1798	456	175	172	-40	202	139	536	238	-75	-137	-72	291	-647	294	293	77	-29	-212	-289	180	-99	101	-40
1421	1091	681	568	390	366	575	156	367	413	206	450	581	458	696	2500	553	428	-3352	-1577	288	321	26	690	-151	150	267	762	558	1561	555	629	523	460	410	217	316	-31	1027	1074	484	561	650	369	430	434	492	134	442	443
1422	-104	-101	62	-155	-425	-104	136	-60	-141	-143	-181	12	28	-14	-61	-55	-308	-1029	-810	-152	-66	-44	-47	30	-187	-556	-113	202	-255	-293	-91	-48	-52	-44	-75	-327	-251	-92	40	-125	-94	-189	-117	-147	-147	-312	-4	48	41
1423	-954	-876	-468	-306	-845	-632	-608	-778	-416	36	-300	-472	-420	-207	-2005	-55	-279	-1842	-2274	-225	-549	-421	-536	-639	-512	139	-443	-331	-1046	-235	-323	-458	-82	-505	-654	129	-210	-288	-670	-501	-328	-474	-107	-229	-653	-1317	-624	-279	-97
1424	114	1	78	149	350	26	99	49	125	74	57	94	106	62	671	160	122	179	71	2	67	96	125	33	94	765	110	167	33	19	164	195	-8	64	52	113	122	138	62	-1	51	-71	48	24	43	136	27	80	87
1425	521	484	330	600	160	309	627	459	307	250	391	261	296	313	2795	543	297	130	-498	444	-48	369	536	221	221	1499	551	796	781	450	684	837	554	165	375	371	463	783	759	592	594	456	553	386	458	605	500	780	404
1426	-282	-304	556	-403	320	-56	-341	-117	-257	-290	-36	11	-329	61	806	-57	10	-943	-507	-163	-260	111	-337	-506	-276	-616	-66	-180	-557	-340	-403	-509	-129	-89	-81	-328	-415	170	-604	42	-227	-158	-146	151	-114	-580	-465	-166	25
1427	230	271	90	404	222	432	63	191	-69	213	187	220	226	377	-34	11	149	627	676	19	134	231	113	228	264	706	280	189	180	481	356	233	275	121	157	330	328	301	492	355	215	156	76	122	153	307	-28	241	204
1428	4018	4876	7049	7690	6071	6386	10402	8614	3589	7313	4937	4771	4557	3112	5174	7832	2468	7960	5643	3954	3139	2986	5019	7290	7454	4249	3485	5889	4633	3882	2347	5840	6058	5492	4853	3079	3580	1966	7480	3124	5114	5699	5684	2890	4295	3157	4451	6299	13233
1429	2711	977	699	643	764	1316	2293	660	1725	1197	1025	3197	2147	1260	1684	859	1117	1028	-576	902	945	2407	1013	837	842	3	1258	1102	478	1325	804	1117	1237	907	593	1186	856	1145	724	480	543	565	201	303	1346	939	2131	823	713
1430	35612	47180	18420	41486	61810	41874	42412	51709	11936	11410	9981	24546	38628	34160	485240	142602	102644	386579	235131	37766	7673	13258	59656	22398	22670	22505	28567	28329	126509	21805	22670	36180	111905	21341	22696	5754	31507	65841	151835	54007	55183	114297	110492	77287	60447	89866	71846	48129	60985
1431	1030	675	520	1124	971	510	546	981	539	744	474	750	838	705	2646	921	897	546	1516	241	348	437	720	726	746	3417	563	638	2462	1066	1258	1316	862	302	316	756	770	564	1172	701	995	692	1169	667	457	917	463	798	746
1432	7451	8748	20262	7261	19046	10796	25734	15100	16075	8866	9190	20228	4926	5974	4550	9491	8142	20142	12417	5258	13083	12774	9240	7743	22338	12081	15361	14754	13529	8121	6141	17306	3096	10450	11689	2154	18305	21654	1107	7693	21015	5321	21603	21381	12028	16538	17494	14705	21776
1433	384	-178	-150	-271	1663	10685	-53	-209	-31	-133	-24	3399	-259	-173	-218	-212	-226	626	221	-48	-203	3548	14144	-194	-163	466	-150	117	-350	-205	-63	-294	-62	1397	68	-76	-273	-119	-151	-79	-137	-112	3484	-186	-121	-105	-197	-178	-68
1434	-1836	-1379	-871	-717	-1359	-195	-516	-971	-681	-335	-615	-1224	-998	-1214	-1410	-545	-1364	-2242	-492	378	-151	-275	-480	-541	-885	970	-862	-443	-2312	-954	-1016	-177	-532	-581	-413	-503	-558	-709	-1754	-836	287	-868	-430	-854	-607	-628	-587	-182	-316
1435	62	24	57	75	160	9	127	115	-11	98	71	91	40	78	-121	53	127	-377	771	-111	-20	117	-76	-92	-58	38	12	85	-34	69	138	75	-12	-35	-38	65	57	22	-35	43	62	-64	25	51	66	-72	234	15	28
1436	433	463	280	1630	526	2039	3171	1476	323	781	226	1193	289	844	1320	2510	2849	1760	305	55	242	608	1594	98	96	342	791	772	691	234	831	117	4317	1661	189	426	590	1393	1154	471	254	13463	474	427	242	5257	94	525	2809
1437	243	152	154	212	276	224	227	294	177	334	50	151	143	164	707	150	350	2715	930	126	120	108	173	241	95	455	165	157	284	154	231	342	170	67	80	67	170	302	593	175	78	60	67	153	1453	141	126	197	48
1438	239	53	107	50	4	255	87	-62	95	-11	116	89	-59	69	-930	-3	47	-1410	-74	50	33	4	-21	-42	107	-75	178	102	-23	56	105	64	85	48	52	67	124	4	-27	66	29	-39	106	-40	226	-14	82	-35	-8
1439	190	87	94	135	70	80	27	156	25	71	34	127	52	23	88	178	126	717	614	-28	39	32	133	126	-3	-175	-19	221	296	183	39	-59	-22	25	55	56	79	14	88	127	67	-42	131	-23	73	93	-3	28	67
1440	-147	-303	-76	-326	-445	-118	-150	-123	-245	-239	-258	-133	-220	-58	-1496	-283	-338	-1903	-35	-67	-192	-298	-289	-325	-427	-1745	-475	-136	-505	-462	30	-286	-2	-150	-58	-487	-194	25	142	-267	-145	-70	-208	-83	-114	-524	-359	-297	-252
1441	42	79	61	73	-83	170	76	60	8	105	78	75	36	173	82	91	98	-761	-14	-299	124	119	189	276	196	274	44	75	259	77	101	-103	59	79	78	199	100	65	212	84	4	50	88	22	57	190	38	15	94
1442	-13	-63	42	-114	-150	-100	-36	-49	-15	89	4	-15	-123	-48	-297	-65	-129	55	-357	-100	-76	-38	-43	-60	50	61	27	-90	27	-41	18	0	-22	-62	-6	-52	-17	-59	-119	-48	-33	12	-96	45	-52	-52	-16	-22	63
1443	-61	64	-97	-124	-114	-62	25	-23	-17	-25	-46	22	-10	-65	537	-69	63	289	238	-1650	-53	-75	-340	-150	-52	155	-47	212	-113	-129	-97	249	-97	20	-58	33	75	-175	-5	41	69	4	11	-21	-32	93	-109	-58	0
1444	465	549	212	142	95	330	147	354	254	302	212	289	144	146	445	211	308	1484	917	20	237	265	252	293	317	518	149	311	733	358	254	306	165	154	179	386	293	281	544	93	122	162	159	110	279	269	161	237	264
1445	-50	44	-12	-28	-93	24	20	46	-6	-56	-11	-26	-18	-40	-1156	-105	-88	-994	-33	-22	-6	-7	-15	0	-30	-38	-44	14	45	15	-49	-63	-97	-17	-20	-69	-5	132	47	-34	-24	-220	54	-47	-47	-67	-69	41	-12
1446	9	119	-66	46	181	226	-366	-373	-38	55	109	-44	4	37	1300	-183	-175	-2544	-995	-32	34	65	-104	-337	100	404	-169	-373	-566	-208	-76	-315	-231	-125	-89	228	-183	-125	-609	1	10	-118	-168	12	187	47	56	319	2
1447	96	443	42	-30	76	61	-32	-192	168	80	32	65	68	42	193	234	170	543	-560	-3765	258	60	-66	42	113	-271	89	141	-166	428	56	41	152	32	19	518	436	76	53	129	50	21	224	-60	146	451	78	31	25
1448	506	440	1017	636	974	1014	300	1182	1134	242	137	207	22	513	415	712	1543	-7657	-7750	269	83	73	-55	404	331	1068	608	1080	-23	1244	509	956	128	62	211	313	453	868	508	756	450	417	491	518	243	394	194	441	173
1449	1062	392	556	812	362	556	744	206	543	399	203	566	941	241	-469	484	523	-1611	523	415	234	381	168	365	439	-1091	718	294	1367	1807	227	312	271	99	398	1207	562	79	486	635	40	553	257	499	124	15	246	430	280
1450	-485	-498	-83	-292	-203	-238	-366	-395	-330	116	-362	-356	-465	-223	-970	22	-436	-4209	-2225	-290	-71	-289	-26	-65	-392	-1465	-264	-141	-271	-196	-316	-68	-363	-147	-279	-397	-397	-217	-472	-592	30	-351	147	-172	-295	2	-306	-242	34
1451	-136	-89	-74	-25	-142	-31	-99	-76	41	-123	-217	-1	-50	-51	113	115	20	-1309	-659	-151	-58	-43	-87	-80	-175	-423	-59	-69	-86	-71	-83	-193	-98	-45	-70	-110	-102	-188	-49	-43	-78	-104	18	-253	-138	-160	-90	-85	-66
1452	317	349	274	37	234	175	196	357	59	269	233	251	109	255	788	407	248	-198	-63	71	264	234	99	207	283	-364	260	30	252	25	458	330	118	43	169	7	284	216	779	300	287	119	123	180	286	262	275	353	366
1453	457	-209	66	-71	304	107	115	203	143	151	589	736	74	384	-736	72	-68	-433	35	397	-4	729	215	60	494	-326	327	177	366	24	120	152	652	1074	1445	266	169	165	-89	139	240	291	52	346	683	788	493	68	614
1454	1136	960	709	7820	1100	3353	14310	1960	368	5341	1035	1306	1276	4916	5563	16010	2917	1974	2346	455	860	866	3625	1766	169	1868	1499	998	1580	23150	1159	1179	9326	11965	341	16127	692	688	1983	889	1494	1023	1439	833	756	3663	426	9813	5573
1455	2853	1361	2408	1751	3736	5799	1631	3365	2337	2293	2293	2653	1217	3795	1566	1423	2792	3318	1905	6565	4731	2840	2270	3753	2167	1492	1762	3339	1294	2067	1870	1838	2563	4769	3047	6128	1164	2384	2248	3397	2052	1355	3418	1566	2654	2872	1195	2094	3909
1456	749	400	652	823	649	867	696	588	1529	488	933	404	1310	818	-539	485	535	720	1293	1099	-1	409	1012	539	327	1544	895	798	765	653	1538	450	781	365	908	505	404	602	518	581	510	909	460	637	447	173	399	1832	911
1457	2975	482	2307	503	1498	3503	1922	1874	3456	1231	2634	2300	1029	2879	-270	1489	1966	1229	2085	7433	2611	1581	837	640	1747	379	3648	1399	1222	752	4441	816	2515	1639	5388	410	1553	1937	2303	3716	3182	2778	1755	3480	8493	676	2093	3012	2336
1458	55	-58	27	-23	-19	11	-35	28	-15	5	99	114	89	-28	-165	235	26	-1289	-365	85	-30	80	154	106	140	245	189	-85	210	-74	64	-58	49	16	56	26	98	79	-331	104	49	172	-12	-18	57	37	-42	43	132
1459	8618	5061	8027	10061	5447	3453	7850	4984	6146	6123	3925	7232	8808	4039	5903	6027	5828	1835	3598	4494	5692	4585	5886	7553	6717	1565	3136	7530	10878	10160	4603	6055	7371	8512	2390	9455	17354	1475	6251	6682	5252	6332	6030	5835	4519	4103	4290	5078	5822
1460	8	12	-11	73	102	16	53	11	6	38	-49	-51	156	-3	592	138	34	536	407	62	123	-87	177	43	-12	-1210	67	-2	76	-26	5	126	-94	12	8	-17	-64	295	95	56	-47	81	-152	58	0	-46	-95	-43	-25
1461	635	983	470	3084	404	286	1414	884	724	1285	1460	813	1212	43	2881	1858	1578	-1100	363	138	464	777	3353	857	1972	4	973	1053	638	207	341	935	1410	1809	1033	409	250	675	1233	273	1719	1511	669	561	868	660	452	878	3194
1462	167	167	140	1030	252	8	56	273	144	446	42	773	10	102	567	-54	634	830	101	6	2287	809	145	100	445	-122	102	381	-59	-29	-45	244	-101	31	33	42	-25	31	193	62	0	10	107	71	106	-82	137	122	42
1463	168	60	78	193	997	62	3447	1213	57	320	1026	23	67	304	294	678	34	-76	-166	73	921	-7	61	404	-21	437	-51	-135	70	45	110	53	28	79	4	95	-36	93	164	-3	-46	11	-3	25	-38	222	196	95	36
1464	184	-443	-638	-679	944	4	154	-395	-805	-387	-480	-539	-68	-765	-893	85	-896	-2145	4353	-411	-737	-736	-1059	-1195	-741	-3966	-505	-550	561	-411	-607	-492	-66	-595	-489	-705	-642	-735	-162	-531	-600	1273	192	-653	-700	-1056	-608	-336	-125
1465	231	272	163	94	391	187	233	154	205	176	123	142	-5	190	73	68	397	162	-322	109	170	156	196	152	5	211	88	154	199	332	69	160	73	104	134	156	80	-69	23	129	141	-15	76	71	92	246	108	-62	-2
1466	708	955	668	744	443	730	757	937	574	619	850	729	633	806	1542	818	520	604	-329	821	448	698	373	521	635	1539	916	647	817	1006	789	727	1283	512	540	726	382	1063	1134	1231	410	923	672	586	749	409	367	330	798
1467	4384	2143	3471	1653	1911	1600	3078	3213	3484	2493	3186	4493	1671	3369	2101	3258	3228	1089	1434	3282	2797	2447	2152	1256	1386	2387	4049	1307	710	1579	3249	3033	2492	2767	1301	1803	1970	3809	3444	1868	2384	4855	1669	2493	2338	3082	2250	2447	2243
1468	744	930	388	1435	1195	559	868	1099	636	365	497	685	474	570	420	795	476	1551	2765	340	460	744	412	34	-12	2278	302	945	1185	881	1314	1151	999	203	160	628	88	596	1808	717	511	714	489	359	119	846	432	107	406
1469	477	289	930	20	-9	132	246	459	263	-48	331	338	-16	27	-187	114	-30	-602	-214	10	-116	85	106	115	137	-274	853	1662	-69	210	8	372	-164	181	205	-92	330	1411	-89	-86	515	273	1067	450	95	235	593	262	852
1470	437	612	18208	307	298	330	2347	176	1096	1219	264	219	433	184	1232	11677	815	2090	724	65	312	112	122	249	178	-243	347	436	412	653	245	258	78	94	175	96	415	296	717	149	275	289	206	107	183	309	66	138	71
1471	159	-211	18	612	814	547	208	138	-203	796	605	131	486	235	1019	1064	1491	-4718	83	716	174	485	640	-254	66	860	654	275	600	306	370	113	626	846	451	493	772	657	1384	434	651	262	396	199	216	-388	241	299	759
1472	-142	65	-31	56	-80	-35	-129	-172	-36	88	194	-26	-87	263	523	187	292	-5327	-518	63	97	177	146	154	-27	766	164	-52	-322	-19	-145	111	158	90	-53	57	-77	54	28	0	32	-5	60	48	91	25	-6	115	93
1473	129	97	72	75	417	246	166	120	185	86	96	167	106	253	-579	291	407	504	482	40	125	11	88	357	186	244	224	147	202	138	163	-5	73	41	98	76	27	108	37	157	92	354	62	202	78	136	142	178	176
1474	-138	-320	58	103	-110	26	18	121	-162	-138	25	47	-33	-91	575	-107	-76	1085	153	-37	403	14	-55	100	-64	172	-80	-13	-289	-18	-149	55	-1	105	-5	-140	-191	-205	-123	-157	-102	39	177	-142	815	-207	-12	-54	13
1475	300	177	324	309	550	268	266	290	158	291	185	251	245	190	109	190	208	-5145	-1250	-89	129	201	268	98	220	1148	355	216	481	541	346	295	220	90	191	266	315	116	12	235	152	95	264	88	126	161	196	162	121
1476	305	450	89	275	233	64	119	140	124	203	150	62	416	205	393	130	186	890	367	41	339	130	256	55	265	263	175	218	537	408	218	214	69	122	167	176	209	112	229	31	150	141	153	94	175	349	106	140	117
1477	62	-37	-44	150	116	-42	58	88	-25	-19	5	-109	15	-22	428	118	-35	146	281	-146	56	8	-199	69	71	-30	27	48	12	-88	86	81	29	45	68	-39	162	11	-136	10	62	-17	103	231	84	74	18	-26	124
1478	8640	5850	7915	13916	13904	3012	18391	24305	7778	11895	10604	6288	4117	4239	17447	29606	17961	9922	6063	5250	2664	4000	2587	10903	22152	5356	6013	7718	2135	2654	1659	14325	12599	10923	8330	4094	2753	3901	8588	18813	2452	28685	4605	5840	8764	2157	16889	4538	12401
1479	-46	308	281	391	-26	144	381	39	55	293	106	189	812	345	-51	-29	129	837	194	34	165	126	63	7	-5	245	99	574	-55	175	324	203	541	425	376	72	145	192	383	32	295	73	655	285	-100	37	-145	337	285
1480	254	687	121	167	386	185	277	588	123	-86	170	240	437	406	154	422	676	2120	1052	56	17	217	165	220	48	2178	372	-181	-249	-13	305	-90	139	360	286	311	180	710	223	261	54	179	129	29	-131	634	5	4	124
1481	3056	3050	2639	1747	5959	2447	1031	1236	2020	1202	1554	1173	1696	2039	1811	1924	1722	51979	17554	1579	1191	2312	1267	2084	2607	5351	1781	4267	3225	3249	1460	3991	2018	1124	1477	2458	1883	1251	2202	2249	2098	1115	2190	1218	1686	3516	2008	1017	929
1482	451	178	330	275	51	342	175	238	304	198	143	263	199	-212	-94	137	355	-1110	749	-7	285	131	58	239	306	42	132	387	204	497	348	431	132	38	116	190	174	45	227	102	108	179	85	211	210	92	-167	207	151
1483	4887	7719	10022	11314	12111	5812	15947	10731	5928	11405	6394	8936	7957	6378	8614	10328	10146	10442	7073	11186	9277	5594	10364	14359	17840	5770	15312	6986	6108	13098	6061	11480	10630	8784	9025	5359	15717	15487	4955	15718	11784	7109	14398	28577	5157	6312	9942	11154	13911
1484	402	325	219	166	10	229	353	209	269	349	216	171	286	282	38	332	341	752	-514	270	177	301	309	110	183	580	352	241	391	382	337	388	233	136	182	307	283	246	335	122	282	167	253	87	180	266	144	367	301
1485	652	1076	739	990	625	769	845	732	632	1384	1184	664	778	586	1059	659	501	1527	330	703	418	930	1690	1551	827	852	579	1254	1456	947	649	837	1768	1071	1456	1137	1034	726	625	703	1261	514	1108	472	589	1409	839	878	1498
1486	471	262	331	331	54	133	-242	-31	75	153	241	-32	78	103	-222	315	-193	849	527	140	470	139	207	341	213	914	-32	527	-245	453	-128	-273	135	382	291	307	-227	-21	-260	-9	414	100	156	-60	162	639	210	139	186
1487	8708	4199	4268	4928	2809	3996	5242	4773	6505	5329	6482	8327	7036	7215	1714	4720	3406	2852	6729	6164	4497	6584	9581	7532	3252	3522	4841	2394	2457	3337	6937	6083	7650	5903	9723	5012	7300	5905	9675	7164	9639	10216	4592	10104	5495	6083	7338	11438	11304
1488	640	593	422	1126	1495	770	1376	1062	351	994	627	476	660	521	1413	1391	952	1018	390	1011	380	434	416	901	628	767	662	299	784	446	327	500	250	253	269	376	287	388	-64	206	183	319	336	487	570	427	234	1385	488
1489	352	669	497	3635	698	834	788	1260	409	1240	619	633	734	495	3435	3585	3076	236	1263	295	243	785	460	603	966	2757	391	429	976	424	545	442	186	258	407	14241	830	318	1490	177	374	1128	305	202	313	866	533	410	348
1490	276	40	114	193	258	119	211	179	168	106	35	11	80	56	-268	9	-108	250	48	182	152	65	203	188	-65	-31	85	154	-448	-7	72	164	44	147	148	-131	92	-139	104	-52	68	-44	214	-58	398	177	-29	295	21
1491	349	281	178	-52	267	143	150	40	299	273	488	333	262	41	880	241	325	-526	-331	25	229	219	661	-79	183	-478	131	163	96	46	142	-77	181	197	201	568	138	-23	56	196	86	236	203	198	115	194	53	86	-26
1492	670	15	619	183	475	252	1235	829	857	559	382	515	106	283	2363	780	1626	579	363	659	232	14	491	260	333	446	693	29	122	-6	623	518	335	882	433	124	148	678	58	470	884	499	780	1120	375	768	348	604	656
1493	1528	997	1517	1529	1133	1253	2224	1558	864	1656	1257	841	1002	662	3316	1541	615	1070	879	693	503	813	853	1587	1454	1304	685	962	1132	1067	738	1359	1132	848	858	829	1195	461	2358	857	591	2149	679	588	773	540	822	951	1784
1494	1203	1175	1595	803	838	1546	1005	1105	1333	642	708	1358	1167	1334	525	1301	578	1203	1485	1588	1166	936	802	750	589	1413	1441	982	1286	956	1871	1368	502	438	762	713	931	1344	1035	1373	964	744	1088	994	587	643	596	1496	1500
1495	1340	1003	1105	841	830	1183	1279	1337	1214	1586	2366	1577	1492	1984	1145	424	904	1775	2470	1413	1141	1684	3541	1957	1731	1975	902	810	1269	957	2556	1667	1934	3663	2276	1378	1221	921	1462	2249	3726	1512	3165	1290	2095	2563	1764	1864	1865
1496	-175	-183	-222	-240	-185	83	1205	288	-131	245	-43	-214	-204	-12	-169	13	-255	916	-849	-58	1535	-278	191	-127	-168	-271	-3	-171	-202	-440	-380	-370	-322	1800	119	-263	857	-20	-696	58	1881	1674	17	333	-255	980	843	-269	-109
1497	-47	33	29	-34	-162	183	57	74	-403	61	111	-22	46	14	244	-11	-13	-248	-625	50	96	-18	-66	104	-117	66	-18	120	-207	-34	91	-11	87	-41	24	69	66	4	17	-2	65	-89	-3	-64	-11	63	77	59	-13
1498	402	236	666	534	514	394	387	316	576	638	476	393	553	402	506	434	330	2251	744	1255	878	626	564	555	827	197	233	1130	453	508	498	434	613	1038	1198	1259	747	396	765	700	473	746	473	361	1479	766	689	509	625
1499	9500	5634	7795	8441	4062	3151	5658	6078	8148	3745	5878	1584	5504	7325	3444	6335	8558	4561	6327	9070	6554	1358	1994	5255	6603	3295	5474	4349	10365	16791	11569	6780	4472	2752	1596	8194	8832	7956	8205	11251	10238	8706	5861	5842	3440	4247	3067	7848	11717
1500	444	557	335	981	538	545	472	1025	323	203	77	120	342	556	813	396	423	1040	1278	66	372	202	135	601	364	128	784	709	1100	710	658	1034	97	277	93	247	691	1122	1224	727	1300	484	767	386	-83	150	140	265	-46
1501	246	380	56	37	-154	250	126	98	240	203	333	159	132	87	492	127	38	-893	124	-154	323	213	141	199	259	497	174	103	454	47	190	59	317	492	463	214	428	86	210	293	144	218	324	193	213	154	498	249	250
1502	-199	-130	-41	75	-34	0	77	92	-48	-35	28	-55	-75	-45	-595	90	-22	21	-478	-364	-2	-60	-48	51	6	-334	86	-14	218	-126	-128	13	51	43	-11	-22	-88	141	-130	-46	61	-40	213	-109	-31	-146	-5	-9	-203
1503	911	821	596	346	837	637	715	669	494	942	656	555	637	573	1551	635	1052	1252	2222	497	555	833	755	565	532	5562	630	573	1671	886	1303	905	547	431	332	887	801	640	973	785	658	375	669	535	838	743	600	531	396
1504	520	492	423	432	442	273	671	465	420	363	536	344	432	250	256	511	336	-424	200	280	227	312	571	1147	252	647	376	320	428	328	197	277	396	308	212	303	326	339	203	272	255	557	134	329	301	105	97	518	256
1505	200	107	209	29	428	459	320	431	640	361	470	242	403	755	1414	504	555	-2300	491	315	409	330	-71	603	84	-216	116	-48	-92	-82	136	-4	110	-37	-43	-106	-174	-43	-96	222	27	169	-40	72	-51	-240	23	275	12
1506	1754	1280	955	1609	2533	836	991	1502	1144	622	576	841	638	1373	2787	617	2070	7689	2736	596	600	588	841	921	1220	4059	676	873	1880	1120	1381	1708	959	473	382	839	990	1824	2257	936	985	2782	617	549	684	1361	665	1007	437
1507	72	146	142	-32	-49	153	115	11	190	60	225	116	238	153	193	183	208	-946	99	161	295	143	77	158	48	-40	52	244	276	131	100	75	34	198	306	250	57	132	65	227	-52	309	212	101	80	279	278	96	141
1508	1140	1834	355	315	523	1577	1331	1138	174	315	319	1116	895	492	18081	2528	435	5279	1956	2420	416	592	3676	826	1655	122	3955	3584	15147	1648	146	1795	262	1027	1727	17	4630	661	1100	465	3814	1681	10228	2323	2103	3611	1791	374	3780
1509	1062	1614	1782	1352	891	1847	2421	1659	1786	2364	1476	3590	2056	866	1494	1814	943	4609	2956	2418	1862	2930	1064	2375	1573	1539	809	2454	1336	1057	627	950	1539	1661	954	1776	2018	827	958	857	640	2647	719	1349	1843	879	3179	678	968
1510	48	11	19	18	-221	1	43	48	111	67	-1	51	-81	24	-773	82	45	-1219	-538	38	65	55	4	102	63	121	90	227	221	23	26	136	74	19	14	-17	92	10	224	-41	-8	160	181	-55	40	71	76	-6	-18
1511	405	541	566	483	208	255	56	713	751	445	373	270	775	665	-8	736	190	-1261	-1061	672	499	252	237	302	540	26	577	278	122	686	540	815	367	291	431	54	89	706	447	453	371	322	513	310	206	364	378	740	288
1512	5963	1567	3935	3146	1905	1658	2072	2681	2998	1607	2013	2855	1572	2195	-5	2337	3386	893	3147	2196	1990	2112	4843	1414	3267	3043	3969	3648	7413	3369	8847	6469	2781	5753	8378	3803	6326	18054	12563	10848	7474	15676	6118	8194	4285	4869	2830	5501	9135
1513	-7	-415	-56	7	76	-192	72	263	-12	13	247	-196	-52	-240	-753	-172	2	-830	105	-54	-25	186	-260	-416	-151	-75	20	-229	-149	-35	-139	170	133	156	-2	182	-11	187	-462	-156	-14	-85	-227	-236	42	103	37	-14	-65
1514	2510	2022	710	3533	2488	692	2954	3474	2392	1621	1797	4013	2389	1405	616	1189	1040	1449	2949	380	1436	2426	2144	1962	4562	2339	7289	1898	8529	5802	902	5477	1074	1328	2550	752	7088	5301	2121	2078	5998	2486	3513	4357	986	2113	2928	3068	3377
1515	-409	-107	1366	-303	16	-105	-329	118	-127	367	46	-248	-268	-211	-28	77	234	-3651	-2014	-4	603	-38	218	-696	-84	-1383	175	-72	159	812	-123	-372	399	118	408	-58	-57	232	14	270	109	487	355	1137	2760	150	331	123	832
1516	716	331	294	447	1506	-140	314	52	-257	618	182	541	36	310	2972	410	196	-3345	-1134	761	164	726	671	365	651	-2117	1038	-600	835	802	1678	311	-14	110	867	241	988	279	845	360	681	211	448	493	621	338	577	658	-129
1517	76	-93	40	73	-45	32	155	163	266	-63	134	159	122	137	357	7	107	-368	-238	-20	47	90	106	629	133	272	278	367	196	133	51	285	34	250	94	-43	251	405	-80	10	282	103	166	152	38	72	280	109	239
1518	1133	841	692	954	807	295	631	990	784	551	505	376	443	396	2090	773	966	864	1481	366	384	534	153	271	487	3629	755	540	1281	1004	867	711	311	249	308	352	591	895	1396	629	422	357	462	534	624	535	499	427	308
1519	739	1800	231	317	881	155	1614	260	717	140	210	279	604	206	-374	302	927	-935	-266	427	683	302	223	238	320	493	198	3	429	210	109	-14	577	242	22	-64	224	83	-3	305	203	95	228	488	1633	-72	346	987	386
1520	224	335	244	179	7	399	14	164	339	193	161	90	203	190	588	279	-211	959	-9	186	227	212	-41	66	858	47	58	327	-7	415	-51	133	30	91	87	18	87	178	785	-61	22	614	65	104	165	9	458	-5	28
1521	1258	436	613	515	374	903	395	397	914	445	610	814	539	380	474	299	301	502	611	220	762	857	278	371	763	112	889	468	191	289	357	681	1116	297	256	323	100	157	-65	357	310	172	641	507	323	314	394	346	340
1522	830	620	491	422	681	510	281	401	760	831	330	851	671	207	107	479	592	523	231	569	520	904	566	300	427	544	405	351	460	537	1047	402	466	373	616	399	323	94	889	346	705	702	133	78	592	439	414	179	338
1523	133	159	94	148	-51	101	138	-23	119	109	50	-48	182	86	1121	235	-24	2452	194	28	54	62	148	-24	221	87	-3	89	409	252	103	68	104	74	58	182	143	126	208	40	33	-32	103	-130	51	290	61	200	47
1524	1046	467	1012	-83	700	1479	528	329	394	695	1042	2334	791	568	1709	1239	833	-1028	-572	1581	1257	1763	1684	842	1535	1197	874	435	50	722	882	535	1148	1030	905	984	1204	3691	579	318	474	322	473	1459	929	1947	812	796	1059
1525	-381	-272	-178	64	95	-90	112	21	95	66	44	97	174	161	-13	102	203	-295	-98	20	-149	86	711	58	-21	-103	-51	104	-35	109	-34	-4	353	343	463	-128	174	-49	192	414	23	79	180	56	149	221	258	347	329
1526	136	309	204	143	312	264	167	176	234	550	234	168	109	43	66	59	8	902	543	158	383	144	103	293	103	136	103	205	55	73	49	472	108	208	111	65	109	181	106	45	99	158	141	198	541	37	250	409	249
1527	-37	-32	-48	-110	-124	78	60	-85	-14	77	33	-24	-6	-92	896	52	-20	-58	-319	-61	-105	-12	91	224	-49	-283	-60	38	25	-63	-14	-41	-79	66	27	59	5	-124	410	-91	-20	47	20	-6	-92	-142	30	-24	54
1528	1023	1311	650	8050	1545	1930	6604	3711	1820	5226	3335	1521	1467	927	3547	6289	2556	2891	830	676	1445	1123	3687	6786	7034	1841	1845	6576	10515	920	963	5825	1402	4860	3222	2362	19721	2303	1462	703	9547	1886	6702	33709	1610	2168	10140	2278	9291
1529	2264	218	320	123	202	389	246	126	793	119	632	603	105	548	790	367	178	1646	791	276	156	677	327	152	401	707	1761	178	285	72	481	1195	1146	574	612	347	205	673	285	759	543	575	559	751	667	359	475	231	197
1530	-41	44	-11	88	-260	32	58	22	33	38	13	-3	-108	16	116	67	21	-1404	204	49	29	40	63	-11	53	26	16	43	38	78	26	37	-126	-29	12	25	-28	-38	186	58	-8	2	-28	18	42	-11	-26	-1	30
1531	-326	-187	113	-136	-411	-121	-331	-175	-94	-378	-40	-285	-169	-141	659	-108	-142	-8142	-6051	-86	-127	-40	-213	-69	-81	-1706	-102	-201	-367	-169	-260	-238	-73	-94	-101	-137	-249	54	-450	-330	-18	199	-208	-51	-231	-147	-128	-15	44
1532	-456	-149	-108	-263	-302	-210	-114	-319	-114	-159	-102	-93	-439	-240	-959	-325	-246	-2992	-2080	-111	-234	-59	-263	2	-130	-492	-206	-93	-4	-178	-411	-265	-33	97	17	-11	-146	-274	-269	-49	-165	69	196	-81	15	-59	-179	-257	-135
1533	131	-1	-6	95	425	153	415	150	182	362	439	43	45	-9	424	196	200	173	300	336	-110	39	468	828	309	505	80	297	140	202	35	245	777	633	307	59	173	69	225	208	365	700	296	94	278	348	84	276	162
1534	417	287	149	491	447	347	581	420	227	439	429	387	334	107	1381	12	519	557	753	435	288	373	871	376	442	-346	566	1009	1197	583	327	209	266	292	459	444	1510	759	166	165	588	248	810	1303	316	589	1195	376	649
1535	36	110	10	-115	-319	120	69	-320	75	59	58	92	-37	-50	1455	-112	562	-853	-855	-20	132	56	491	-328	-99	-281	377	135	218	201	-7	-131	-25	-175	15	46	234	447	-308	56	44	-241	36	304	69	-559	26	43	152
1536	565	2405	1948	2462	5776	1066	2409	2217	819	3899	1793	1156	1611	1713	1069	1614	3006	1691	2291	2573	4385	949	1112	3987	1404	2792	1346	2946	466	242	1744	893	2768	5850	2523	44	2972	1630	60	4469	3693	3354	3158	8196	1625	2847	1727	2499	3780
1537	5	6	-55	44	-53	-34	18	31	45	-4	-13	-26	18	36	628	32	8	1672	-101	10	-3	8	-137	-14	62	-52	3	57	36	-47	70	-56	34	69	-40	-18	-12	10	11	24	0	-10	-14	51	2	-30	17	-20	-24
1538	222	326	217	400	8	237	330	299	375	336	490	182	306	193	17	331	178	1674	-18	217	284	481	697	373	600	751	574	487	739	382	229	478	174	305	238	383	784	475	12	165	304	233	498	685	228	524	962	580	403
1539	3188	35948	2134	15160	18632	10292	32921	16276	17541	11145	9311	24957	26073	15655	16126	8336	4484	1071	3184	5907	11754	12904	9584	4066	23599	8648	2463	15178	8580	4728	2014	9550	1529	5763	15965	3593	24862	8416	8476	7471	14330	22238	11178	7383	2523	5013	12581	18399	10395
1540	54	91	97	93	-79	120	108	107	69	85	90	80	49	41	-421	36	123	-85	361	-48	92	36	139	154	61	198	43	108	133	145	121	89	4	70	17	103	85	86	174	50	130	114	57	54	166	113	150	-7	9
1541	1994	1428	4240	3873	2995	3060	2252	1843	5163	2675	4732	2905	1585	2662	1611	2552	2146	1451	1907	3653	3982	3033	2978	3219	4223	1345	3827	3495	1651	2582	3801	3757	3077	2992	3982	2825	2769	4341	2426	2642	3369	5491	2381	3364	3279	2831	3275	6933	3165
1542	362	1909	685	27210	2284	392	1764	6210	3288	3898	4652	169	1195	422	1314	5418	4445	2708	1413	1052	729	1360	935	8937	10976	2559	1318	2573	1193	1287	704	5964	2309	1851	2099	2882	2660	258	567	1351	601	834	745	2031	1513	883	2051	1889	3005
1543	2870	4171	4400	4186	3633	2586	7448	8053	4043	3894	2709	3601	3159	1833	2251	4594	5872	4330	3679	2459	2159	2580	4857	3455	5328	2221	2434	4730	1276	4382	3363	3399	3033	5723	2256	2914	3374	2911	5771	2153	3952	4340	7719	3671	1236	4587	3067	2226	2762
1544	592	1910	810	1427	-54	413	711	432	260	462	603	1264	640	134	-239	372	1001	1569	4238	174	626	1385	1076	2522	876	946	1218	830	790	547	136	881	159	338	472	194	714	838	-39	164	944	48	475	717	600	330	329	414	687
1545	2305	1044	1284	279	-1605	2505	203	-268	2916	-209	3059	696	988	457	-997	-66	-576	-3235	684	859	1835	1221	1311	59	1373	-517	397	481	3342	84	1210	1196	748	1100	1446	284	689	-115	-119	1247	3290	941	-573	1684	158	724	1331	1367	761
1546	7	-163	-121	-124	-200	142	-133	-89	-154	-265	-211	-364	-286	-77	495	-310	-279	514	-451	-128	-88	12	-125	-139	-264	-1053	-32	-52	-170	-273	-165	-105	-142	-74	-40	-369	-90	147	-196	-141	-191	-185	-157	-24	-26	-149	-225	-64	-144
1547	5940	5502	5922	12760	6104	3318	10038	12791	14989	4917	7447	8090	3695	5009	2535	5339	6083	1770	6181	1122	10387	6377	6312	3915	10176	2302	7510	5702	2873	1946	4239	13942	4538	5847	8544	3656	2128	12223	5753	2650	12770	22130	5538	7012	4305	1804	7475	5712	6592
1548	505	653	2217	491	471	672	103	-140	302	147	168	-54	779	46	231	98	61	-926	883	750	2491	-58	44	81	188	504	777	29	533	274	153	872	1804	394	853	691	33	108	275	1998	824	198	-163	465	945	124	44	738	295
1549	724	962	332	777	101	427	943	663	935	504	408	1162	1391	323	1035	842	701	-1311	-410	1402	463	941	411	943	749	1602	1184	867	431	1014	188	829	989	616	640	718	1797	544	1252	9	502	2260	515	999	363	1416	624	844	525
1550	32	-29	9	-74	-251	-67	73	78	16	13	-5	94	79	13	181	114	-92	-749	-412	-120	12	43	231	22	2	-113	-36	-4	162	-21	-4	-13	-88	111	-6	50	91	101	15	30	27	185	63	38	30	354	64	34	11
1551	491	823	1158	588	229	723	665	723	970	851	929	514	621	572	-360	46	380	1408	1355	1431	1277	434	371	906	447	397	184	790	29	428	337	1021	617	1114	756	337	539	656	567	966	546	981	821	711	346	769	553	615	495
1552	2996	1607	1441	1528	2157	1067	1303	1876	1681	2608	1917	1841	210	149	2082	3159	2870	4773	4075	392	699	1154	516	902	1061	511	988	1128	1708	1261	1354	1632	1712	1056	1059	990	338	1037	2583	264	493	2675	348	209	808	491	225	834	3560
1553	533	525	790	412	218	298	274	367	543	238	349	495	354	286	-617	480	281	-158	999	359	328	410	389	281	295	431	417	690	629	308	560	154	352	164	350	360	345	517	613	576	333	898	605	572	486	534	38	501	344
1554	2986	2842	4134	570	1063	1482	724	1383	2595	1234	1104	2632	1849	1843	-1075	691	355	-667	325	1197	2896	2168	2549	881	1256	-520	1403	2627	559	1678	1046	1024	1942	3117	2247	1924	652	1800	1330	4159	665	2428	1696	1056	1610	908	1623	2846	2695
1555	3024	2173	6114	1691	965	1719	1641	2510	1461	2004	2291	3582	2938	2065	722	2475	582	77	1019	3851	2931	2560	201	1173	1750	2955	2516	1603	1341	3962	1672	3335	1953	1302	1663	2602	2125	1573	3505	215	1025	2418	1402	1015	2219	4128	1999	1252	847
1556	27491	22438	23701	19179	40293	33190	29609	46650	17068	14650	9061	19231	25747	30074	32274	50048	31644	74160	90998	29292	14370	11892	21369	25593	26192	16106	22698	35893	26149	40558	25289	36268	16828	20034	19044	11063	30556	33064	34242	31597	35711	18572	38977	48839	32050	67409	28054	13997	22878
1557	-190	142	682	159	-87	248	57	53	324	193	282	7	124	69	1109	-79	-59	-1211	330	521	-37	110	311	-20	168	296	-23	249	-83	-117	88	-127	218	210	232	191	-69	377	-48	-2	44	1206	62	267	-56	367	431	-124	285
1558	446	64	-9	12	317	252	68	92	24	265	183	20	153	18	-214	598	-265	-73	-285	120	39	121	221	-95	-321	-1222	109	-76	-118	-219	381	-156	225	81	-5	115	41	46	313	-69	106	418	189	138	-17	326	148	-60	311
1559	22	-69	-46	-80	139	-27	30	-26	17	-17	-25	-60	-65	50	-340	-92	-8	-643	-300	-83	4	29	-63	48	-135	-248	62	-13	69	-17	34	-97	98	-13	25	-39	-2	-18	125	-66	79	-32	-21	2	65	-59	-23	14	-20
1560	-152	158	248	367	-529	73	102	-219	194	351	356	-62	-154	109	-1018	28	-643	-4931	-1594	25	339	96	105	259	14	2385	-327	39	298	-16	259	30	1	191	223	-175	333	-745	149	117	-183	-83	188	223	362	343	-116	130	-63
1561	1031	2160	3268	2451	3780	1389	1706	2085	2559	3788	1848	2739	1407	2552	1262	1721	1086	5947	7305	2264	3076	3103	2608	2954	2386	-1606	1577	2047	1558	3209	1893	6219	1894	1852	1874	1069	1292	2228	698	1822	2154	2062	1960	1889	2697	1658	1788	6033	3232
1562	-90	440	593	317	616	408	-25	161	311	373	321	399	386	422	1678	340	603	1139	-418	185	399	625	794	451	413	545	243	257	26	379	758	337	578	281	490	477	464	604	1069	544	391	310	307	337	325	640	266	412	15
1563	6	-17	111	-3	133	138	17	57	26	72	59	21	43	163	719	-40	5	-326	251	-48	93	-100	37	45	37	439	101	154	151	59	-26	49	-41	125	-36	25	-28	-32	-68	17	6	-42	40	-92	-4	24	100	30	-5
1564	5102	4929	7893	5808	6112	3367	6830	2562	7832	6035	5792	6596	9874	5483	3830	7913	5101	446	4349	7840	7841	4306	5799	3143	4527	3846	5019	2387	2966	5413	3350	5130	4797	1565	3208	5967	4945	2608	9455	3646	4275	4865	3026	4456	27315	2483	5533	10934	5960
1565	47	-689	-15	191	350	98	110	76	162	245	253	106	285	285	497	703	481	1382	-851	301	407	156	-449	373	100	720	408	-117	186	1	383	531	200	119	-58	141	590	147	-212	34	744	35	130	130	445	511	453	18	-6
1566	56	78	19	185	182	65	84	31	-29	-139	-36	-49	-37	41	148	76	1	42	108	-75	57	-54	-116	-9	177	453	71	188	103	66	5	89	40	40	41	-18	202	303	31	36	190	17	141	102	12	183	89	55	99
1567	734	593	681	326	585	1038	544	611	836	556	435	1397	423	909	828	284	316	3534	1711	1372	700	977	448	789	472	-80	89	503	335	529	583	376	339	656	486	289	482	326	295	748	229	394	532	191	357	558	471	1194	647
1568	89	161	438	3	105	382	114	-73	354	116	477	340	39	152	14	19	-78	-10	267	263	350	443	290	180	111	-101	46	36	163	-102	147	215	153	183	121	176	49	135	112	70	6	140	160	109	652	124	22	235	57
1569	16971	11838	14994	4729	5028	11194	17419	10078	12067	7473	10623	15469	8547	17958	8659	6642	5710	7754	11904	15076	10123	12047	8750	6792	10241	5995	9309	10318	9311	5695	15767	10399	23400	13083	16729	8108	9989	7884	10861	13770	15604	9430	7622	15780	13308	16486	11237	11571	10062
1570	887	713	381	395	949	476	372	500	588	452	391	507	331	515	2774	481	686	1873	1581	310	403	529	833	275	314	694	309	480	1108	1177	814	125	326	205	256	507	510	632	946	282	261	388	231	310	334	432	325	515	251
1571	-71	-50	11	89	94	16	781	-25	-50	45	129	-4	-86	41	487	56	-96	45	471	12	-33	-31	162	92	67	168	-12	236	-2	-113	-69	36	117	115	112	29	61	-136	-125	17	-39	151	405	20	-15	90	-30	47	-67
1572	99	208	132	38	297	148	54	141	133	166	236	188	505	185	1273	148	133	20	-117	185	196	361	337	428	164	125	78	154	185	130	176	31	149	175	204	223	161	105	176	84	108	2	178	15	92	321	190	41	76
1573	8	97	383	280	149	269	354	356	187	146	187	179	397	214	415	297	107	1086	1262	231	352	149	688	450	210	202	163	156	586	138	506	500	358	529	517	540	214	235	338	368	221	385	449	470	151	779	301	567	367
1574	79	175	74	44	-43	157	-6	31	35	65	81	78	32	86	1299	104	31	-499	-164	27	97	38	-33	132	39	132	99	44	204	166	47	-1	34	50	46	-2	18	-14	43	-18	-14	167	93	-23	68	20	-7	5	2
1575	421	-512	-276	-632	-101	163	-755	-996	303	-334	-27	-270	4	-228	-709	279	-95	3625	2139	-74	-336	57	-263	159	221	-900	-134	102	-1132	-107	26	255	-181	-238	-286	468	-715	364	-269	-774	-345	-1258	-514	55	-165	-462	420	-76	193
1576	-120	27628	-112	102	-65	-63	-219	2944	-28	88	-63	-99	16	-17	-631	104	272	1991	-585	20	-44	-87	78	705	73	181	236	56	-172	-112	7709	28	32	30	20	0	-49	-81	-310	182	11	3424	-51	-128	37	-55	-244	0	54
1577	695	325	279	9888	1202	151	793	944	632	913	878	581	50	231	428	492	1571	-1131	12528	112	331	853	1022	16130	1286	-19	776	1900	531	1132	349	608	1557	1646	681	2317	894	4711	310	1339	8401	11562	2238	1025	3773	879	490	2586	1110
1578	47	-96	-42	-174	153	-100	-103	-86	61	-135	45	59	53	-22	288	-38	-223	-154	-134	4	-82	-33	35	-60	-21	479	-39	127	-167	-147	136	-117	79	-24	-13	-13	-10	-7	-261	-137	4	-117	-27	140	65	-69	46	51	22
1579	82	121	43	78	118	88	9	-18	45	-38	116	70	15	59	84	-84	29	759	198	29	23	38	-8	48	98	175	27	8	-55	44	39	68	-2	51	21	43	41	107	-6	-75	11	81	68	113	36	79	60	5	36
1580	-44	49	-47	-53	-109	-59	-94	-161	-4	-10	-96	-24	-68	-36	-490	-25	-127	446	-145	-19	-19	12	21	-103	-44	160	-7	-140	-287	-131	-70	-49	49	-64	-15	-27	-27	-162	-268	-153	-86	-83	6	-100	-42	-167	-121	-59	-109
1581	-405	-310	-192	-290	526	-91	-259	-416	-239	-137	-128	-236	-73	-272	-81	-169	-1	1820	887	-93	-104	-50	-81	-104	-149	244	-213	-132	-65	-57	-312	-522	-115	110	-18	-27	-93	-66	-441	-121	-213	-218	-46	-325	-153	-246	-139	-76	-73
1582	-234	-104	-116	-226	-408	-152	-165	3	-34	-56	-133	-161	-173	-308	-1256	-393	-33	-2388	-854	-125	-12	-23	277	-112	-94	-397	-156	-159	-132	-152	-490	-17	-71	115	116	-157	-130	-288	-172	-150	55	18	-110	-98	-138	-78	-133	-67	-242
1583	104	124	113	-100	-184	98	15	-124	-95	-17	29	-82	-142	-19	1158	-86	221	1302	-582	-97	1	7	-140	-196	-223	165	46	91	-244	21	214	-127	116	-7	-19	-137	46	237	-33	-76	-12	-97	173	-35	-65	-95	-101	41	82
1584	1266	976	1677	850	1351	1059	878	1207	1158	1125	1346	1421	2859	802	2750	1179	892	52	1743	932	1725	1167	1140	1493	698	800	925	584	353	930	1003	1835	879	1050	723	1197	1047	2095	3293	1357	992	2250	565	628	725	1072	145	1006	962
1585	1174	697	1632	1757	2223	1411	1027	1281	2075	1556	1725	1771	1511	1732	1894	1516	2215	1814	783	1733	2068	1719	1638	997	1133	2930	1775	1097	2162	1775	1804	1592	1191	1852	1514	2280	1540	2580	2603	1561	1427	2596	1712	1684	2182	2138	927	1382	1126
1586	92	-76	-1	-157	-257	69	-82	-124	-55	-76	23	-61	-34	-140	-515	222	-224	-856	-121	19	-122	112	12	89	115	-128	-137	57	-47	52	-47	-175	37	-67	13	33	226	-34	-54	-2	-21	-9	-18	-95	-163	-74	64	73	77
1587	366	285	321	335	683	481	52	55	342	218	335	175	263	227	-482	293	559	-686	-362	256	353	292	577	66	289	603	282	349	809	801	316	349	167	177	317	124	355	405	360	279	271	104	524	306	132	368	171	263	196
1588	267	101	117	188	545	142	180	321	333	261	173	20	404	130	1173	434	44	3298	2486	145	12	227	265	214	183	1160	176	167	26	200	273	224	27	4	0	255	299	350	677	192	350	189	338	45	168	125	6	242	25
1589	2278	1132	1120	1464	1338	813	845	1026	1304	1343	1754	959	1355	1077	1020	1510	1713	3649	782	728	1279	1076	1054	1028	1068	2675	1953	1118	1685	758	2172	2985	1931	1924	2476	2823	1789	2103	2308	1961	1901	2154	970	1499	1278	1248	1583	1738	1798
1590	-98	69	50	-81	-83	136	43	41	-30	-43	58	-26	-52	-17	193	93	-93	-431	283	-36	-40	-106	104	-11	2	198	0	-83	-412	48	-39	37	-63	-16	-25	-103	69	-58	-36	19	-51	68	15	-21	114	-56	-29	37	-48
1591	256	339	262	274	558	472	303	301	169	341	231	187	204	233	1724	573	660	1367	814	243	180	337	444	355	222	1109	299	214	853	261	346	174	198	262	135	247	324	303	275	159	250	143	236	291	196	324	217	279	217
1592	11	-13	67	618	-181	75	50	68	32	69	103	23	131	47	-582	585	114	718	-146	-68	-3	-52	182	135	117	-58	5	16	39	77	68	122	46	34	-19	976	115	142	171	27	16	38	-71	-131	2381	-1	-23	225	-39
1593	-11	-379	645	-307	-404	-146	-161	-157	331	-71	-6	-77	6	282	-2375	-79	-283	-1845	47	-51	332	-48	5	-234	-10	-504	-97	-82	-1092	-412	-178	187	-80	276	154	-145	-328	-3	-149	-223	-78	256	-121	-140	499	-50	279	-214	221
1594	-42	1283	-1	268	356	286	-82	185	49	285	13	-6	-19	106	531	363	-12	-54	528	34	79	297	-64	94	1	737	89	-9	-165	64	-33	328	-62	-76	-188	48	-146	123	-240	225	-4	149	18	-225	-81	3	56	42	-80
1595	339	152	206	338	598	745	296	234	160	336	561	358	271	280	136	224	346	1651	411	290	208	607	171	244	101	1086	276	386	813	472	271	487	312	171	191	870	431	419	396	263	353	291	524	105	225	305	250	270	298
1596	45	134	81	81	102	186	-5	39	24	86	25	66	57	110	60	58	13	1935	429	-15	65	95	147	118	113	159	114	41	404	143	85	88	76	22	37	208	80	150	286	-14	116	207	81	-47	42	65	139	57	142
1597	1669	23766	1878	3322	6456	4719	2182	4537	3656	17081	7033	2226	4194	7260	709	5465	10160	6711	6535	2804	3280	1940	1469	19438	10061	2338	4114	1335	383	16192	637	1512	2551	5894	1729	162	1640	-178	98	5089	3305	2652	2563	1143	2887	-62	-107	3826	1794
1598	1610	138	767	-44	353	1333	1221	580	2583	398	1770	2196	321	2160	1031	450	-8	26	1416	1203	512	1549	1195	361	613	212	659	273	250	131	774	318	754	1703	4615	281	251	958	-10	862	1101	2534	1116	1368	4674	1923	3294	959	582
1599	713	6099	786	915	1846	949	1068	1307	818	995	2310	1581	1801	1593	846	1535	772	1503	609	760	1955	1438	1069	3240	3497	1105	842	988	31	676	-26	681	1341	1071	588	706	442	170	865	-31	225	325	25	419	1213	-24	1139	855	1316
1600	640	350	379	132	98	492	372	56	359	374	871	393	304	236	829	192	397	1066	1194	283	618	476	410	352	198	190	123	227	269	204	337	268	366	261	370	129	137	107	280	197	338	97	372	266	242	563	338	281	313
1601	-48	762	50	890	-290	549	-44	823	-29	12	326	630	448	237	-470	355	-61	507	28	73	-8	467	-19	17	-9	2489	7	13	-6	738	4	-6	315	272	501	-39	2136	-40	45	-42	-4	170	1198	6876	227	86	72	509	2605
1602	592	400	829	246	289	716	139	431	531	514	175	299	315	297	56	298	141	646	231	370	533	369	520	346	565	191	280	367	580	607	270	492	283	295	161	261	276	520	645	418	336	257	375	254	529	688	218	203	290
1603	583	449	25466	2457	838	348	1881	5730	1267	11782	335	792	765	828	657	32891	1643	2615	1356	369	304	299	520	7390	703	342	1413	687	693	468	416	586	22	963	455	339	933	664	452	502	1213	572	1843	1343	9272	340	901	629	1105
1604	-37	-56	27	74	-110	-72	18	60	0	8	-45	30	17	-4	304	119	-148	-847	-273	-80	27	1	-139	13	10	-579	-88	-13	213	-120	-25	29	-57	-6	3	54	-56	17	-34	-7	-10	-134	-88	-117	43	-6	-10	-125	-16
1605	248	238	138	177	126	28	221	144	96	148	144	138	86	94	245	258	139	90	280	12	112	124	90	99	182	479	199	230	248	195	265	124	73	67	99	166	69	45	109	114	68	32	68	4	28	280	190	213	28
1606	69	-31	96	153	54	12	64	18	53	-73	138	-16	-4	99	514	301	22	1653	-517	28	34	66	56	25	-50	-7	60	101	-1	84	-26	60	115	59	88	-47	78	121	149	23	-10	252	48	93	-21	-184	125	78	25
1607	151	175	359	735	425	168	608	495	87	143	329	127	75	-53	571	538	430	1302	230	54	58	288	263	332	555	52	-38	134	25	23	69	199	109	145	249	15	13	127	138	83	33	2994	-6	76	30	276	149	189	382
1608	32	-35	44	53	429	24	97	99	-6	88	3	47	10	-2	-320	115	133	430	307	54	-129	-31	104	-32	-56	210	102	-49	207	171	-61	-79	-68	-12	-27	116	107	98	-38	125	-17	-111	-13	17	7	46	67	58	56
1609	-39	6	45	660	288	1	150	88	94	104	72	11	659	384	510	144	276	1213	186	237	13	-23	238	-15	862	145	-36	27	142	-53	866	208	1404	423	46	-36	46	5	1	912	1454	8	1224	78	70	-20	79	-38	153
1610	-37	65	-182	-354	213	124	306	181	-13	-161	-204	-126	63	117	754	881	-222	2528	-267	-130	-83	-49	-71	-37	-166	-525	34	129	-584	323	-59	-189	-42	23	90	-175	229	219	505	187	132	144	390	-153	-134	-44	-71	-71	44
1611	-27	20	-28	-17	-175	15	-61	-152	0	-23	-52	-59	-41	-39	145	64	7	411	255	-67	-50	-27	0	10	-8	-76	16	-2	89	-111	14	-208	-46	-32	-35	-44	49	34	-11	-16	-22	20	-50	-19	7	-19	-12	-72	2
1612	1316	2849	1026	2631	1230	1164	1097	2711	1888	787	720	1515	1290	1522	1266	1404	1542	1477	-296	485	663	804	2904	1023	754	3170	3364	3537	4518	3123	1621	1888	627	288	774	486	4968	5777	734	288	2421	353	924	3442	322	1516	2750	1542	3571
1613	76	77	37	119	-176	48	-2	135	51	51	12	67	115	-46	74	80	126	357	-624	76	23	134	18	48	85	-315	32	136	333	150	2	130	57	33	40	129	91	253	165	44	52	3	64	41	48	90	-76	146	17
1614	1240	766	833	1363	975	577	850	741	1277	1052	1212	1069	717	1399	1972	742	1228	1893	846	418	541	1552	1278	1052	873	907	1236	682	1221	701	2527	2198	2141	1459	2104	679	785	1330	2488	834	1037	1355	1178	876	2367	1435	1185	1339	1484
1615	603	2601	966	1223	577	1856	3584	3780	413	2031	1057	976	475	1745	2644	2772	946	3696	730	310	1014	457	605	1447	1070	-367	3284	3790	2039	1048	1456	3021	782	3803	2878	566	520	2715	1387	11366	3933	6294	6127	2176	322	1677	4139	1542	7041
1616	107	-49	44	113	92	-1	113	116	138	-7	42	14	37	131	48	187	173	60	385	-91	62	-12	37	86	-14	117	168	128	399	211	108	36	-40	49	4	58	89	6	81	89	184	56	98	58	172	-201	-54	67	-24
1617	152	-68	83	-72	561	41	146	5	99	-150	124	184	110	-38	166	-17	117	2223	2369	-5	59	202	25	104	140	285	230	175	105	121	-34	70	109	7	-49	-50	178	241	-41	86	51	74	131	158	34	-86	22	131	70
1618	463	556	483	347	75	589	424	276	365	-453	-74	235	254	207	244	603	396	3028	-216	-1411	295	234	-330	55	369	-126	466	547	482	17586	310	453	269	-75	-39	195	386	675	383	356	299	430	277	206	369	369	143	158	136
1619	-230	-32	-50	-137	73	-28	-177	-305	5	-21	-21	-46	54	-129	-865	-109	-131	168	-234	-128	-6	87	226	-39	-48	-243	-169	-35	61	-51	-206	1	-36	-56	25	-26	-165	-239	-163	-252	-101	-189	-135	-40	-158	-135	-43	-186	-104
1620	530	346	230	534	359	304	439	219	306	132	269	99	237	277	2119	392	367	1620	1041	235	264	192	447	264	222	592	261	305	701	439	216	390	134	164	164	154	411	258	590	419	132	235	354	183	21	434	163	241	79
1621	273	414	4425	1160	946	335	1781	1928	250	577	721	2413	655	301	-837	1319	295	-3168	-39	110	299	4020	133	3582	303	1264	1694	310	324	148	624	533	76	350	256	1757	199	-180	420	-43	64	704	187	78	189	325	43	165	454
1622	251	-530	-281	-151	86	808	-694	-390	9	509	-135	-303	495	147	359	359	86	3882	4018	664	1109	-132	137	359	172	1122	546	-204	520	209	652	-1072	479	-67	-122	391	406	238	378	512	-45	-45	194	453	-29	-177	29	-628	48
1623	1021	-787	217	-219	-84	497	-121	-51	427	364	779	299	371	195	-1408	308	782	-2712	782	412	-32	577	-401	-216	266	2186	732	58	-252	269	682	-396	449	-23	398	419	-200	218	-573	174	-16	-39	175	372	347	745	416	231	24
1624	382	53	470	52	309	317	169	202	198	104	93	904	313	-6	61	499	574	-146	191	80	323	1099	91	257	322	-547	-4	134	421	281	215	334	182	146	142	157	195	-6	233	198	162	147	184	38	79	286	148	235	116
1625	1174	765	1091	811	545	404	605	687	1342	669	613	304	488	526	1292	759	443	84	371	495	799	473	669	474	927	632	775	589	897	763	866	550	839	556	823	774	626	1251	703	2201	509	3011	860	1061	867	763	291	668	454
1626	-363	-364	-164	-585	-168	-173	-174	-372	-163	-216	-340	-283	-64	-104	1280	339	-365	-1194	-126	-201	-215	-159	-242	-389	-113	1684	-340	-174	-575	-28	-506	14	-161	-72	-174	-281	-318	-331	-348	-284	-314	-141	-122	-326	-79	-183	-287	-330	-287
1627	-152	-3	-513	-152	-22	-94	-243	-259	-149	-61	-112	-707	-132	64	1518	-143	322	-1292	-566	-286	225	-39	-157	410	62	-1447	269	114	100	14	258	3	-212	-191	-59	-134	-15	-36	-126	82	-104	-61	-45	202	-135	-90	-297	-209	-242
1628	220	-202	-125	52	-702	-22	-247	94	-98	-2	171	95	-91	155	-843	5	-29	-1876	-1625	-30	98	47	53	13	-149	-841	257	-112	58	-11	-476	-313	99	71	160	-159	40	-95	-30	-330	100	-51	19	-116	158	148	-47	-119	56
1629	1456	1893	1053	966	522	651	1391	1507	1002	768	988	1156	1020	707	921	863	581	3373	-40	517	471	793	2165	705	2209	1768	3559	2717	3648	1169	511	2102	373	661	883	505	4067	2864	592	484	2348	2839	1767	1748	408	979	2837	489	1928
1630	766	710	671	618	537	1044	714	801	606	490	566	529	529	523	867	617	967	2558	1437	531	464	607	310	349	476	1955	762	760	1620	1237	947	526	749	360	283	427	618	990	948	398	626	516	658	369	761	457	507	529	325
1631	1092	586	905	953	604	480	299	317	871	443	568	234	419	1354	586	272	791	-3148	-418	424	1316	425	167	540	251	852	1570	589	922	1166	3011	906	595	346	57	445	412	1706	1643	1921	1013	1140	719	1981	1184	994	470	521	842
1632	442	-26	43	237	-46	423	72	187	464	353	-145	260	362	94	-367	282	753	913	307	409	143	-46	190	-116	-318	493	606	58	-183	741	249	202	95	52	-89	-549	447	499	259	24	-115	-179	-166	-46	-28	-226	37	47	463
1633	-857	-383	-560	-1095	-818	-594	-453	-656	-273	-779	-424	-339	-540	-573	-2140	-439	-764	-3256	-2434	-324	-291	-540	-729	-550	-583	-1910	-800	-649	-1575	-773	-779	-656	-572	-377	-565	-579	-684	-815	-625	-285	-768	-352	-318	-510	-529	-676	-553	-722	-170
1634	342	694	469	705	732	496	661	606	326	414	233	459	578	377	1415	856	1095	1600	397	163	263	326	1057	865	258	282	331	849	860	1028	826	665	560	485	296	530	865	745	653	762	544	440	664	787	265	431	290	656	645
1635	4952	2436	4069	5604	2654	1475	4540	3613	8114	2509	3847	3797	3084	1919	1540	2000	2247	100	2995	3078	2935	3146	5248	3238	3235	2182	8044	2496	3294	5976	3640	3420	2932	5035	4605	6211	3638	2886	7600	5454	6944	5556	2201	4152	4798	2455	2328	4245	2165
1636	-110	21	-165	-251	-373	-413	-155	-189	-150	-271	-67	-26	-77	-39	-411	-14	-796	1206	-1193	-166	-183	-75	-208	-144	-346	-1159	-49	-189	-336	-135	-84	-349	49	-152	-140	-274	-140	-293	-103	-57	-175	-119	-326	-266	-109	-530	-147	-88	-134
1637	123	420	404	-16	31	262	194	33	347	88	673	133	184	127	1914	99	224	7	665	128	282	171	624	210	130	-184	21	260	-27	11	2738	183	531	1040	2061	66	303	768	54	1858	1157	185	773	1651	-61	452	505	98	427
1638	226	404	313	296	308	310	365	229	314	175	94	188	317	125	1021	143	70	2005	124	235	112	162	449	340	257	-989	-136	117	365	355	18	361	163	232	291	114	392	169	222	-12	180	76	217	-47	-181	414	61	201	-118
1639	67	123	142	216	155	137	-28	173	124	100	12	44	107	121	-627	11	48	899	236	5	105	-185	19	19	13	478	40	16	379	132	176	293	-6	41	19	42	64	67	-100	93	117	173	135	31	82	79	26	6	84
1640	143	204	80	302	166	350	550	262	0	219	137	158	140	78	-646	493	654	409	219	170	125	277	1151	69	176	1017	118	392	372	385	343	234	2666	2274	1495	312	153	7667	85	850	548	1245	579	-8	190	3806	12	135	820
1641	269	629	581	306	158	475	657	494	432	649	761	1102	299	648	1469	150	193	353	1149	227	933	1471	695	2623	726	822	596	1312	508	327	305	752	593	712	919	434	382	209	517	439	833	667	554	300	1975	538	232	661	782
1642	23	-86	-226	59	78	79	72	-19	-123	-112	-44	2	-77	-15	-1299	-83	-21	-745	-90	-70	-134	-60	-247	-49	-245	-121	47	-102	-208	8	-13	-3	56	-90	-49	-83	-50	48	68	3	11	-130	-23	-10	-53	-27	-160	27	79
1643	159	282	193	2	267	479	-454	170	-26	159	22	210	512	75	10777	1359	97	544	1581	769	115	194	795	192	468	-423	216	366	6409	402	105	285	264	251	509	-47	396	-1	827	246	138	446	2941	587	642	606	456	20	409
1644	295	50	173	134	425	250	231	99	204	114	569	274	340	427	-444	253	-7	-588	-506	386	916	250	317	287	152	-140	230	231	-73	193	1088	25	575	299	1548	90	261	568	215	1397	338	172	234	342	272	334	340	133	216
1645	596	488	512	244	577	465	117	-18	596	385	347	281	430	222	1168	219	293	110	1055	403	417	311	668	325	198	794	103	312	659	330	234	261	103	236	248	312	275	193	604	186	228	690	431	199	500	315	295	443	208
1646	629	222	284	503	147	219	340	227	379	283	320	377	227	334	2010	414	204	-60	182	144	532	563	435	282	264	1971	274	73	510	472	766	180	187	1200	1186	465	593	97	663	419	321	159	240	338	257	373	447	775	126
1647	-25	52	56	27	98	117	-1	170	90	137	79	39	16	100	-941	98	-37	482	256	25	67	6	-62	99	73	84	19	83	-75	57	163	124	88	-1	56	-2	42	-35	-48	74	113	111	-17	-7	38	139	-65	81	159
1648	-165	-282	-175	-452	31	22	-51	-38	-117	-175	34	-148	-152	-128	-332	-215	-93	-291	838	-169	52	-8	-503	75	144	696	163	-39	-789	-32	-288	-363	6	-79	-63	-153	44	70	137	-77	-73	226	-139	31	-84	-139	24	-264	-50
1649	372	579	447	-281	-12	161	-215	373	430	85	229	10	103	169	-699	122	126	-2475	-538	72	111	86	50	-93	107	-1053	-11	616	194	-66	-119	414	-6	13	27	163	29	148	380	-130	419	60	451	112	-111	445	139	494	315
1650	-67	-57	-47	-32	-122	5	-68	-23	-1	-3	0	-5	126	-174	-246	-145	89	567	-96	-16	-29	35	-51	-30	89	128	2	-27	40	-43	66	-32	-95	10	4	54	76	-35	-19	-15	-17	-140	-37	-62	-16	73	-10	83	79
1651	-34	-15	3	-25	139	-36	-19	-60	26	-54	-24	-5	-64	27	517	95	58	-294	130	-16	-31	-44	-25	-66	-80	-18	79	55	106	17	43	43	78	29	35	-30	-72	73	65	49	20	74	81	46	105	19	-39	-57	-19
1652	277	36	86	-117	-130	-13	0	-25	119	50	91	68	37	145	297	134	291	3506	1291	270	80	67	60	-17	39	2793	105	204	459	-68	-152	135	216	94	44	360	-126	366	-112	-150	113	265	401	192	173	-32	142	108	29
1653	715	443	309	3035	591	1689	2061	2821	433	650	896	566	778	18	323	1518	1694	1411	421	426	1315	621	1406	596	1662	5266	2224	12434	4265	13840	1911	19577	913	1150	6502	374	4895	894	559	1610	11330	224	9930	3707	1036	22530	1093	2837	8947
1654	2947	1830	1947	1669	1556	1580	2476	2303	2124	1669	2422	1185	1867	2133	1289	1759	1342	961	1714	1871	890	1111	2090	1954	1852	820	1727	1799	1048	1856	2891	2054	1877	1168	1816	729	1504	1522	3909	3813	1768	2543	1722	2208	1540	1441	1822	2977	1371
1655	17	-3	74	-109	-197	-43	11	6	158	-70	96	38	-39	93	462	85	-185	137	-535	98	70	28	76	28	57	-68	36	4	3	-57	-26	-74	63	55	203	-32	10	33	312	43	-13	50	-11	64	158	4	112	168	42
1656	203	85	107	599	174	352	403	188	267	413	295	199	197	-10	-1696	-284	-73	2641	588	88	341	211	-15	198	186	483	113	356	397	178	145	363	346	177	90	455	83	315	1026	567	453	583	307	4	443	-318	257	120	285
1657	-46	142	6	-69	34	-24	22	-58	1	210	-20	32	23	-23	-32	-73	109	9	-423	-20	-64	7	57	-48	42	57	24	6	-268	112	69	92	-82	52	-57	69	-151	-25	13	-106	-21	124	-56	-132	-4	-63	-10	-52	4
1658	-42	-71	37	-27	294	8	126	35	62	26	14	-21	66	-22	251	-10	-142	1052	826	-58	30	-15	122	-2	-12	659	50	46	-329	-6	63	143	36	83	40	45	91	-146	105	11	19	-15	45	71	188	150	-85	3	-20
1659	3	-136	-83	-99	696	-252	15	70	42	-360	-190	374	101	65	2211	534	943	-2524	-824	-198	-244	243	102	-146	-129	1442	175	75	-406	41	80	647	118	-140	176	-380	297	-388	-152	606	161	401	20	167	-3	-244	-154	502	494
1660	-138	9	44	27	-133	91	103	66	258	116	-190	-139	-15	92	181	-106	-62	-414	-55	64	70	-51	122	78	86	269	28	104	214	154	13	89	45	79	32	19	4	113	101	143	110	93	55	-1	115	292	48	88	3
1661	-207	-264	-168	-84	-228	-231	-238	-117	10	7	91	-76	-273	-219	-682	-212	-24	515	-241	612	-245	147	-32	144	-90	-546	-191	-173	7	-526	-312	-360	-223	137	-150	-182	-171	-283	-755	-288	-364	163	-106	-253	111	3	-9	-35	-1093
1662	592	450	464	287	80	1089	876	660	392	460	566	762	940	636	-1678	523	321	319	144	784	458	891	598	559	401	-719	605	926	635	741	405	234	961	998	1236	207	558	443	199	611	502	525	791	426	542	860	1016	526	1062
1663	-251	-378	-260	-312	-194	-208	-101	-251	-109	-246	-78	-110	-123	-231	-230	-116	-378	2119	-586	-368	-316	-171	71	26	-82	-62	-308	-252	-169	-469	-422	-321	-100	-18	-176	-189	-193	-480	-444	-309	-244	-98	23	-456	99	-215	-15	-94	-269
1664	1322	1109	1474	305	1248	1679	810	1516	2609	1270	2022	1521	622	1561	1092	1146	797	1334	1437	1433	1600	1292	745	1097	1635	736	806	1540	1070	683	1467	862	653	1797	1624	855	953	1500	1393	1205	1284	2524	2113	1106	963	935	346	1180	976
1665	289	561	591	998	580	408	265	397	690	273	276	1177	951	401	495	707	561	274	3322	169	431	625	493	365	310	1071	562	640	615	617	640	494	431	207	228	264	326	774	1022	606	330	362	447	235	224	311	30	364	247
1666	621	443	265	-199	336	317	38	184	251	201	65	31	94	245	856	471	251	14693	376	1123	210	17	-47	98	589	-1519	1143	348	567	1854	374	-54	129	187	160	382	116	280	819	329	286	463	212	369	455	517	277	1921	305
1667	1035	140	1277	1001	731	498	666	1033	1375	-147	790	304	760	620	76	587	502	-651	1089	172	727	499	287	67	551	544	524	944	2573	104	183	1437	983	1121	195	688	1438	1073	526	722	1108	1312	1057	2787	364	-808	1585	554	86
1668	598	464	537	686	1051	487	491	559	385	384	428	565	600	412	573	922	580	786	157	465	235	421	394	383	307	242	414	346	453	453	490	579	417	379	549	384	594	647	262	751	441	527	393	629	353	519	570	538	506
1669	36272	23959	21515	16984	23371	26624	26158	20611	20545	13701	12511	17785	25495	31110	6932	26084	42387	14009	20788	24963	18154	11507	15220	17105	22836	16111	27609	27587	51622	24167	24418	23606	19591	6763	22627	12078	17378	28467	28651	35479	23844	15092	17981	31067	43576	42313	29011	15875	35616
1670	2044	1468	1673	563	623	1011	916	1191	1502	203	467	953	1504	1216	-2448	383	466	-6616	-3900	997	334	81	894	627	185	-3485	861	1349	664	1539	446	1609	353	867	514	1308	2032	1293	789	495	197	523	1121	2853	437	1132	2147	1515	428
1671	146	93	237	49	-24	116	34	76	99	169	256	109	77	72	-633	-11	-174	1305	228	210	161	60	250	212	138	0	-34	208	311	152	25	66	108	272	123	117	-52	-6	38	-32	76	54	146	127	167	241	82	19	110
1672	152	80	6	-487	-609	71	4	-498	-224	-239	-199	-97	-205	-327	247	-296	-648	-7868	-430	-66	-63	-148	-247	-92	-320	-507	-125	-154	-297	-87	-720	-645	8	14	-115	-347	-24	-503	-432	-301	-389	-242	-239	-191	-141	-318	-144	-275	-11
1673	255	214	245	75	310	282	-19	146	256	205	136	78	211	252	193	127	479	1634	606	59	85	128	385	213	111	740	133	312	-10	390	133	232	62	149	264	79	29	102	632	135	52	137	-9	30	200	129	161	186	179
1674	6	299	85	-520	923	-142	-143	712	9	280	-100	-531	-131	-89	-678	-36	659	1924	1380	263	55	-79	-397	266	393	-431	-365	-125	-943	287	-170	1202	-370	32	-170	309	-342	-44	593	73	112	217	324	537	-110	354	-25	-309	-229
1675	921	756	628	487	480	550	585	810	70	1775	901	451	856	216	-906	234	445	1677	691	541	457	704	198	1355	971	299	628	883	-323	915	186	807	701	780	628	939	608	-34	351	195	127	299	28	65	757	550	522	-9	355
1676	-14	105	121	-38	514	222	73	164	86	95	50	69	180	153	-32	-30	396	2498	211	175	67	153	81	-126	184	338	79	161	272	143	140	-90	156	37	77	-14	78	245	295	217	14	-34	97	159	52	683	14	57	138
1677	-285	-523	-290	-582	-539	-450	-420	-363	-399	-485	-145	-307	-398	-336	-1264	-249	-466	-3105	-1025	-337	-401	-323	-483	-375	-399	-546	-323	-423	-1079	-500	-508	-486	-196	-352	-245	-553	-351	-434	-608	-363	-479	-282	-226	-205	-476	-541	-191	-415	31
1678	379	122	98	125	462	139	109	170	219	280	260	127	176	209	489	90	286	-1198	180	53	109	277	263	177	155	978	192	246	224	487	636	126	479	3	209	271	41	498	657	317	28	415	69	75	209	281	154	536	211
1679	191	386	195	62	35	331	287	69	362	87	417	392	169	547	393	54	8	-1450	-1338	253	141	275	428	562	-9	-25	393	253	566	275	215	49	25	191	398	50	510	454	-551	165	516	126	540	684	262	204	594	412	504
1680	437	128	122	-1	202	114	238	114	64	252	211	-12	73	122	-44	379	210	-592	-508	-20	270	146	323	117	46	-133	130	93	487	125	224	150	7	132	60	234	194	159	110	-22	16	156	89	169	73	83	87	-30	146
1681	-173	-280	-145	-344	-351	-163	-61	-89	-137	-217	-40	-98	-320	-21	-179	-287	-57	-1896	-341	-93	-159	-35	-251	-123	-94	-364	-292	-209	-101	-263	-335	-485	-408	-77	-115	-212	-222	-32	-98	-172	-234	-2	-28	29	-102	-311	-5	-281	-124
1682	652	295	530	602	368	455	624	393	877	374	324	504	313	489	74	225	291	-802	-691	388	342	484	484	407	341	-556	436	537	433	529	375	894	392	304	210	445	910	900	684	458	617	480	664	319	538	396	383	410	824
1683	652	371	264	572	664	572	392	462	356	601	419	359	539	324	172	586	978	741	1068	253	275	565	517	374	332	3492	942	365	1342	1100	822	596	429	182	366	547	819	685	498	623	329	279	333	388	324	524	289	458	343
1684	244	185	63	300	142	116	148	236	180	137	136	68	145	305	548	120	132	-253	395	238	84	221	162	208	176	1351	202	136	647	197	276	241	112	91	96	291	238	263	275	50	222	179	188	229	149	302	89	130	174
1685	-345	102	111	-482	-214	-8	3	-3	88	-167	-130	-214	-291	82	-346	-195	-241	-931	-2430	82	92	-504	-123	-113	-63	-510	43	55	299	100	-70	63	-114	42	-40	36	20	42	-130	16	-150	85	-225	-83	-190	64	-190	-126	-54
1686	170	209	319	194	427	79	256	126	135	257	108	197	143	218	74	309	171	237	-119	155	232	275	333	313	251	126	98	218	585	598	204	278	177	326	421	284	215	115	241	650	174	259	198	291	110	103	292	6	146
1687	-186	-502	-96	-261	32	-315	4	37	-324	-273	-117	58	-191	-136	-164	4	-244	498	-326	-38	-210	-170	-281	129	-207	-720	85	-515	319	-244	-26	-148	41	-46	-340	-110	-5	130	-240	-39	-96	67	-450	-370	-286	-653	-456	-179	32
1688	149	193	422	134	753	286	0	53	164	375	225	261	227	369	263	203	348	1372	50	119	144	430	225	173	42	244	210	344	329	267	371	114	458	131	244	322	140	446	494	197	80	190	147	20	104	137	151	373	230
1689	-29	14	21	-54	-14	7	-25	20	-14	-3	20	42	88	64	-679	-1	49	326	-220	-110	27	0	128	12	44	-151	-7	91	-75	50	76	74	-9	-53	-17	-26	-20	37	-47	21	4	-165	21	-46	-31	82	-108	-56	-13
1690	-160	-201	-137	-178	-582	-125	-82	-190	-187	-144	-85	-86	-108	-25	-1336	-186	50	-3696	-534	-153	-188	-96	-228	-138	-151	-435	-139	-23	-132	-357	-104	-13	-154	-168	-89	-19	32	69	-445	-110	-94	-146	12	-158	105	-13	-67	-101	-219
1691	66	-7	77	128	-327	-2	29	65	-69	69	71	-37	129	144	-876	-17	6	-779	-1485	-32	93	24	129	202	18	110	126	-70	-1	65	213	12	-47	79	42	216	102	-106	-3	104	43	30	-20	87	95	151	66	24	36
1692	-21	-9	-53	-11	59	-33	-26	-5	-27	-40	-65	-9	-39	9	-652	-56	-22	498	-173	-37	-21	-48	65	80	-99	-100	1	-93	61	-9	-19	-24	-64	-18	-38	-6	-61	-32	6	-16	0	-63	13	15	40	-33	-38	-9	26
1693	-120	-343	-158	-633	-544	-316	-465	-522	-233	-305	-161	-180	-357	-382	-643	-668	-515	-1280	110	-242	-110	-174	-69	-412	-337	-722	-177	-387	-878	-540	-385	-825	-297	-127	-235	-265	-297	-404	-1049	-441	-480	-430	-193	-336	-354	-507	-145	-341	-121
1694	446	-385	151	74	631	286	133	301	45	93	139	297	80	75	-18	-92	117	-2941	-531	-46	104	350	-380	-40	150	-280	249	-67	-319	-33	-169	220	129	366	196	115	133	228	330	-88	-15	1	42	34	874	186	301	107	117
1695	-246	-289	-121	-14	149	-111	-105	-128	-27	-295	-45	18	-89	114	-1217	-126	343	-3779	-3962	-137	-121	-20	81	-198	-11	-815	125	-278	-814	-354	181	-17	-97	-13	49	-47	-78	102	-244	115	-44	174	5	99	103	-89	316	64	95
1696	332	391	697	435	145	386	322	507	471	541	177	501	590	423	-679	452	1221	1335	450	659	602	376	255	606	196	203	484	534	677	542	265	806	195	204	201	301	279	6	896	321	235	520	330	395	82	301	489	566	396
1697	3449	1884	2395	1283	919	1815	2043	1825	3628	1981	3900	3125	1341	3239	1462	1453	958	2618	1740	4132	2369	2439	1597	1821	2903	735	3214	1402	2542	2074	3068	2905	1598	2664	3898	1527	1469	1444	1119	2243	2148	2005	776	2219	1405	1737	2019	1916	1156
1698	45	-9	41	177	475	10	161	259	58	81	84	159	120	48	397	88	80	1914	650	205	125	154	97	146	87	432	23	89	59	85	57	105	60	36	62	114	89	42	9	102	57	74	4	102	60	122	-84	36	48
1699	-176	-185	-114	-217	106	-57	52	-43	-184	-97	-76	-67	-81	-145	-687	52	-104	302	-807	11	-71	-195	-339	89	-50	90	-43	-190	-532	-208	-142	-177	-4	-81	-72	-145	-101	-165	11	-264	-150	4	-172	-215	-96	-187	-204	-57	-4
1700	-727	-235	-394	-451	26	-446	-549	-865	-126	-353	-300	-251	-102	-66	-3858	-281	-91	-2036	-2610	-105	-66	-273	-398	-406	-183	-1619	-711	-744	-1751	303	-525	-792	188	-287	-432	-558	-697	-35	-141	-198	-746	-381	-501	-258	-546	-821	-400	36	-33
1701	-7	52	220	-4	258	19	58	108	88	-96	-24	441	-204	36	-1311	-242	109	-65	168	-34	178	-16	291	20	-27	-673	0	74	352	-46	142	-119	95	-6	224	-129	200	128	-473	61	211	29	215	86	222	-76	322	264	190
1702	10	730	925	1072	989	-29	715	369	-487	409	1004	1276	260	243	304	911	500	-346	1313	749	115	467	1858	753	585	3508	266	591	205	-492	-203	316	7437	4129	2803	1692	274	1127	1959	3292	1058	7819	597	2164	1398	933	2341	278	1271
1703	44248	60748	28613	40575	47068	53324	40299	49340	21358	17154	11322	24303	31202	42033	40208	69114	57470	56665	59051	33644	13023	14580	31794	14587	29700	21953	32962	43929	44982	46659	31990	51975	42540	12976	23161	10629	34487	65668	135951	53452	49618	44598	52297	39732	46665	82859	58626	35117	59156
1704	13669	21639	19696	21251	22010	13612	11822	20103	12809	9752	8093	8885	19831	23565	17911	29139	31149	21880	34415	21549	13916	6878	17183	12822	14006	7871	17668	20715	26045	30816	19697	23699	15415	6317	15013	10011	19563	35705	70202	32381	22936	27686	19708	28393	7469	21036	20307	15001	19866
1705	-43	1	93	-42	38	-98	-44	-92	16	40	13	1	-20	-14	702	-124	-64	895	177	-33	11	-51	-82	-113	-54	27	44	249	13	-43	72	142	6	50	7	23	95	109	-134	-22	213	-147	142	88	-2	-29	86	-26	71
1706	278	1246	202	1155	450	224	1155	581	320	448	553	328	439	238	221	-1234	336	924	649	44	775	256	808	525	567	917	490	1355	451	588	1098	1047	2093	1292	210	1009	787	2502	309	309	1237	330	1117	1217	344	944	1371	444	821
1707	319	533	983	545	121	460	-151	-99	1230	277	331	378	660	-9	-3343	-125	-406	-1525	-1362	790	339	561	-157	296	-277	-2657	124	-49	532	454	93	-102	29	-79	386	1167	167	221	389	102	213	461	62	454	205	657	95	316	337
1708	-978	-537	-642	-981	-555	-744	-349	-997	-573	-435	-508	-782	-620	-692	-1248	-568	-465	-5208	-2771	-371	-234	-631	-463	-432	-422	-167	-711	-428	-926	-1032	-1168	-935	-776	-405	-472	-614	-817	-578	-1438	-815	-974	-511	-404	-204	-600	-743	-424	-569	-483
1709	497	703	1177	574	873	492	329	831	780	581	447	1255	789	1212	97	711	756	612	277	393	950	1165	324	469	520	563	488	675	207	644	577	489	588	286	265	324	601	823	779	307	429	1091	306	214	405	402	416	467	308
1710	452	593	851	457	52	231	189	455	142	191	409	57	465	160	699	391	114	308	-60	289	341	335	72	93	233	29	519	680	1038	594	517	225	1566	303	456	598	837	818	1195	548	163	446	506	420	362	394	401	75	104
1711	97	49	35	8	-45	73	51	165	65	97	37	-22	25	12	408	77	81	1566	464	-8	98	83	76	14	49	102	-38	159	27	123	-26	-9	54	82	67	64	35	25	147	8	24	33	44	83	14	111	27	31	30
1712	1	153	90	-47	186	51	-284	132	54	-104	10	104	-64	113	-497	58	-30	-1110	1	-44	8	-107	187	63	96	-360	-101	-36	70	-282	45	-6	-31	-41	16	1	7	-8	-244	55	-286	-37	-138	-9	28	-16	193	76	75
1713	392	406	513	238	296	504	218	49	552	396	523	399	319	359	402	221	309	2739	1150	482	1070	779	536	465	367	836	261	389	194	457	321	428	93	290	401	243	160	216	389	200	176	237	77	129	1125	370	658	292	122
1714	352	234	13	373	58	270	145	161	344	325	107	24	119	141	211	214	178	-977	421	-10	-126	98	256	95	301	-250	61	327	306	450	293	-85	45	86	51	111	36	88	171	38	-35	245	335	-8	-129	127	117	17	152
1715	-311	-616	-507	-664	-463	-216	-361	-353	-518	-223	-293	-313	-444	-381	-2023	-394	-460	-1979	-1418	-134	-154	-528	-481	-334	-360	-1608	-440	-419	-932	-727	-842	-765	-373	-188	-253	-291	-443	-548	-884	-345	-475	-256	-361	-372	-287	-391	-312	-439	-190
1716	121	3	53	101	177	215	72	-40	76	32	106	118	39	178	-51	-120	31	534	579	18	50	80	113	77	44	-79	35	94	-133	118	79	119	113	111	135	1	98	6	-2	78	189	240	-52	150	82	292	218	153	79
1717	685	1140	1528	1337	1308	1241	797	1135	1096	817	487	733	979	1715	2017	1026	1780	1253	1241	407	1523	742	365	461	638	130	950	632	955	1076	1086	1254	515	586	526	586	534	1004	1882	1454	756	929	422	518	776	285	527	2175	806
1718	211	242	108	276	162	194	244	177	140	104	46	69	282	154	-169	232	453	-108	978	208	35	97	254	109	141	57	287	299	272	353	487	388	571	223	308	95	238	282	395	816	247	722	149	298	147	686	267	262	344
1719	135	132	2	224	496	70	222	81	10	418	312	33	326	100	-584	-95	-49	957	761	110	9	77	-253	101	50	-710	116	240	160	-114	26	208	618	452	195	678	733	329	571	85	143	-73	233	-222	-75	318	59	380	314
1720	-37	285	20	44	268	123	11	-52	89	138	56	100	1531	803	352	653	-137	-992	17	1530	100	84	305	234	402	72	86	69	-65	138	-14	48	128	182	174	66	-57	88	482	182	-102	43	-76	80	-37	79	154	51	228
1721	-90	-4	512	-115	193	-39	-123	-23	248	325	102	34	207	158	-969	155	89	962	226	225	74	52	616	537	303	-120	37	153	-373	174	-89	72	415	367	357	167	68	228	205	37	176	779	203	457	347	101	314	86	257
1722	153	2389	226	69	8203	2266	866	2628	700	118	1076	6873	2244	92	2476	3163	216	2	118	72	635	6873	263	2667	32	297	293	87	134	53	75	-31	938	568	98	133	50	29	158	98	-18	601	440	91	1	831	1	6	180
1723	2241	3978	3471	2065	1401	2820	3131	2321	7516	1719	3378	4187	3095	2591	2196	1139	974	2474	2800	3275	2731	3801	2997	3872	2482	1259	2535	1802	1270	2336	1730	2530	787	1783	1262	720	2304	1910	944	943	1573	1238	1454	1434	2504	1701	2143	3070	1646
1724	367	382	932	1100	801	411	504	532	869	374	611	394	1603	539	2470	594	668	827	1112	1118	1069	318	719	615	1012	608	427	668	245	576	2101	635	1793	328	1556	961	543	1385	523	1064	513	980	618	1349	823	1315	501	443	715
1725	-342	-615	-96	554	1253	109	-207	-374	-563	-18	131	232	215	-193	1371	199	943	-6987	2316	37	195	691	-1226	-239	198	4270	508	-147	-513	-163	49	-351	34	-88	61	114	-207	819	-403	-393	1	-241	-418	179	131	-312	-186	245	-444
1726	619	408	621	320	349	760	706	682	542	415	727	571	624	686	13	490	90	-743	-330	653	284	557	403	509	476	145	421	843	730	382	770	481	573	456	901	460	425	421	681	1075	491	701	360	561	642	600	625	697	598
1727	371	299	287	181	228	410	423	208	215	335	251	80	270	230	-494	326	198	1054	1103	126	217	256	233	45	310	232	187	172	380	331	335	266	76	153	200	146	241	220	-9	56	80	59	76	202	178	280	153	302	148
1728	569	339	520	646	1510	291	626	537	358	888	347	412	505	119	862	673	429	-1387	-3826	580	405	970	200	721	273	497	-181	351	387	200	9	-158	599	553	432	717	137	-215	376	597	138	381	375	68	382	-166	9	-54	368
1729	51	190	36	56	254	73	72	-45	33	31	-6	49	29	10	-499	-153	17	409	-218	-5	27	22	-22	58	18	15	-42	84	14	-43	19	51	22	44	-19	11	11	-46	146	14	-2	-10	-48	31	-12	30	-32	-39	-11
1730	-155	579	-23	-111	-230	137	-4	-117	11	60	-19	-113	-32	-84	166	71	-9	102	405	48	-109	-26	-167	63	96	86	25	-52	-83	-134	-147	-54	-4	-112	2	97	-70	-2	-100	-22	-116	49	46	48	2	-126	-28	-90	-59
1731	5	-17	-8	-4	-82	-30	33	-11	14	2	7	2	109	6	-864	-40	-102	-973	-22	22	-42	-22	148	6	-15	-19	30	16	62	57	-57	6	107	-51	30	7	14	-1	-21	-85	36	63	-31	-95	-44	-27	24	-2	30
1732	106	149	317	401	-169	91	262	190	202	185	187	31	180	56	-113	169	-36	-1069	-98	5	563	94	820	455	483	30	93	626	256	159	-53	210	524	445	296	439	130	142	160	275	63	872	309	110	659	349	89	55	298
1733	214	74	-62	43	312	179	121	-318	42	27	99	73	260	56	620	76	442	1086	196	129	8	73	129	15	78	2052	180	-24	376	161	75	136	77	44	103	6	258	201	460	-41	94	101	101	106	115	195	41	117	-43
1734	10977	8439	3018	675	16806	5264	4061	11435	2026	3103	11170	4549	11435	741	1378	15720	42710	2931	4942	5533	767	7471	-307	8452	1050	253	24654	-108	353	1633	77	311	65	61	98	52	78	36	1	166	-139	11	12	120	26931	-377	115	3997	-33
1735	490	600	1727	201	490	1462	891	997	1692	451	1540	890	833	1886	1438	917	617	898	518	1016	647	659	697	325	1145	-21	1322	842	644	394	1604	873	706	1072	2296	32	1235	1878	1146	999	2084	2612	1126	1683	1068	781	1798	1676	1081
1736	155	145	-61	-53	1763	211	-128	-37	204	124	61	96	134	59	1053	340	379	-1643	-1058	60	17	403	121	17	-25	1057	205	162	500	28	126	353	188	65	215	151	122	138	8	28	104	134	209	81	116	99	284	524	141
1737	-94	-94	-40	-26	230	-162	-13	-33	62	-55	-59	-42	-53	-59	-249	-111	-256	-567	-283	-87	0	-80	30	23	-18	-574	-71	118	-245	-31	-97	-17	-183	36	9	-60	-28	-60	-25	-125	114	-39	73	-56	-71	51	11	-77	42
1738	729	887	745	608	319	743	298	536	927	617	520	453	460	504	1162	590	624	-114	1265	494	636	644	225	534	585	2393	604	435	1212	753	625	747	553	510	471	761	471	969	702	578	485	949	476	287	475	679	711	512	468
1739	1139	3857	1786	2462	987	2108	2397	2355	1788	3288	3358	2051	1702	2293	1201	1223	829	5996	1761	1756	2448	1980	1692	3947	3339	1403	1243	8287	2787	2416	2563	3335	5770	3696	1860	2444	2970	1826	1692	4673	3397	3622	5012	2750	2892	2524	2386	1111	2476
1740	398	-120	53	22	124	41	137	332	-77	102	55	128	-10	69	-177	154	27	196	273	41	151	-50	29	112	89	-237	299	-58	122	187	56	92	-24	-9	8	-56	32	118	514	-3	-78	-108	152	-46	-62	-82	97	-10	27
1741	84	35	-52	7	136	41	54	103	41	-39	19	-39	20	30	469	97	91	708	-14	-15	23	12	194	50	41	79	98	124	-21	19	31	-57	116	-14	73	-8	-8	115	93	55	-56	-47	82	35	72	-3	35	89	-23
1742	-40	-150	341	149	393	-16	120	100	-196	-21	-91	197	86	-39	130	361	35	-194	1180	153	79	-44	-142	-27	-112	139	87	-87	95	81	-67	-136	62	74	-166	341	76	289	365	333	-19	88	-11	-35	-48	167	213	118	-87
1743	2577	1923	2775	1085	1508	1726	938	1494	1936	1232	2471	1398	1172	2496	1936	1947	1618	3004	89	2074	1990	1073	843	1133	1465	1056	2750	2525	969	2291	2634	1757	3544	1082	2381	1395	1859	2436	3291	3625	1183	1759	981	1535	1221	828	993	2388	1174
1744	753	1403	1200	1496	460	1207	1298	933	1045	2648	1489	2073	1768	1186	2061	1197	2159	551	2536	1029	1829	1766	1326	1859	1384	3767	1595	909	833	1713	1560	1476	1085	1130	881	4344	2292	1323	1774	1060	780	1451	1281	1978	872	757	909	1884	1188
1745	104	193	264	102	386	146	240	237	33	41	90	130	203	71	-582	261	122	785	266	44	-64	125	596	83	358	-293	64	323	35	255	80	236	103	308	267	46	139	87	36	133	161	77	414	20	-5	282	180	1	133
1746	406	941	503	474	547	695	53	392	272	317	581	74	442	192	-123	159	525	-655	-63	126	257	438	523	476	417	247	588	905	653	921	606	451	389	123	301	449	1394	451	356	240	360	278	501	469	235	630	431	31	134
1747	180	51	92	105	23	65	106	154	97	70	67	118	57	31	282	175	88	1566	555	47	144	87	193	121	166	844	72	196	149	166	18	142	101	15	63	76	124	123	25	127	67	178	22	21	136	34	172	-46	39
1748	1021	1302	4162	4148	3653	1347	3055	2879	1024	3459	1420	3035	2634	1638	1787	3379	3575	1652	1943	4743	3543	3154	3825	3196	2661	2213	1795	1260	1036	1596	2012	1947	2426	5088	2187	5900	3126	2408	1138	2855	1747	1759	4499	5965	2137	4691	4610	2128	3283
1749	487	368	591	1390	777	631	999	576	376	574	989	598	215	219	2589	743	342	875	1126	453	553	830	580	435	610	642	503	713	842	1035	1116	1495	579	433	795	679	828	593	269	1382	714	826	772	953	3006	187	663	598	590
1750	-183	-243	113	-234	-349	-66	-194	-81	-177	-25	-32	-146	20	-103	-366	-34	-95	-2843	-765	-9	-175	-240	-174	-334	-254	-872	-76	-43	-257	-132	-257	-109	-221	-83	-22	-147	-161	-97	-273	-79	-142	98	245	164	88	-300	99	-197	-11
1751	-32	-8	-29	-54	-148	20	32	-72	-33	-67	-6	-17	-36	16	269	-105	-16	-1493	107	-29	-106	-71	-79	7	13	-97	-90	3	34	-81	-45	21	64	-45	6	-252	5	-156	-18	109	-69	-54	-46	-7	-35	-38	34	32	-27
1752	614	196	1056	133	127	316	175	376	588	42	244	65	62	175	-314	79	61	1297	-51	70	176	53	-7	-5	108	271	514	220	-139	-26	261	392	115	78	107	-137	141	864	170	299	211	446	150	133	425	35	93	34	125
1753	1381	1765	1864	979	1098	1727	847	606	1337	1791	756	1040	658	1116	367	1028	783	-1230	-27	601	1283	848	5263	984	1007	433	1253	2178	824	1328	801	1078	1010	1014	794	844	1295	1053	1248	787	1937	956	1026	792	1165	1213	520	1408	1827
1754	3484	2131	3701	3014	3541	2800	3955	1514	4378	983	3956	5374	2383	4372	9849	1563	3218	7285	3991	1633	4232	7194	3465	2511	2537	5612	7841	2444	2093	934	4731	6356	4224	3366	3825	5585	2684	4715	4317	8409	7767	4198	2341	2760	3796	6499	3211	4997	1997
1755	433	131	156	611	838	330	550	328	380	420	447	443	609	328	626	359	674	1086	1028	118	223	375	495	236	1184	702	1089	521	346	493	420	578	182	224	454	398	1570	552	397	394	832	657	409	772	224	410	842	825	929
1756	209	513	576	188	385	626	285	220	431	456	499	452	484	305	-338	152	425	-278	250	1046	742	516	349	241	368	118	288	535	331	293	258	442	224	310	660	205	648	352	428	902	577	499	553	570	1104	206	359	681	679
1757	-53	-9	-69	34	-267	-111	-96	273	-33	7	-71	-19	49	-59	166	-262	272	-189	163	14	109	-18	51	55	-106	111	-127	-88	-136	-175	-28	-34	235	-20	2	135	-87	-84	-177	-84	-32	-7	-88	23	84	86	-79	146	57
1758	-22	-165	-137	-248	19	-191	-93	-199	-137	-63	-102	-94	-127	-162	-1267	-296	-145	-985	-461	-251	-241	-188	-349	-18	-190	5	-270	-208	-203	-124	-327	-182	-104	-59	-140	19	-190	-150	-345	-132	-119	-160	-225	-273	-142	-339	-152	-137	-73
1759	-72	-58	-63	29	-87	-68	102	56	-148	-52	68	-284	-40	58	-463	155	59	222	64	-18	-41	-146	-47	31	17	231	94	-69	-126	-136	90	-25	38	8	1	-9	4	128	-98	108	211	-40	40	34	-28	-29	-75	210	-20
1760	-71	-131	-49	-57	-15	46	-27	-55	-19	-13	66	11	-5	-9	-564	87	82	654	389	5	-38	-94	-139	-25	25	166	-14	18	-312	-19	15	42	-128	-19	-18	6	-73	101	148	-93	25	-39	-33	-4	12	85	74	-28	-2
1761	37	23	75	138	390	26	-42	154	77	91	63	122	136	35	-290	163	60	1109	687	48	-6	29	52	98	162	473	37	32	213	80	13	185	45	25	21	33	93	22	-41	34	90	27	47	47	130	45	93	73	47
1762	4494	3694	7249	4089	3278	3674	7722	4024	4792	3283	4795	6298	4083	8407	5529	3173	3653	5228	8746	7953	4501	5176	2031	3456	3398	5419	4743	4513	7308	5819	5564	4915	4062	3848	4105	4594	4304	3278	4232	3420	5228	4072	4286	5173	5900	4164	4291	5720	3634
1763	84	158	67	323	318	183	130	163	121	153	125	1480	175	43	-375	748	1167	132	444	64	88	1351	160	305	104	233	102	97	223	94	74	74	89	55	5	127	221	58	254	110	78	25	125	-19	77	150	214	31	112
1764	668	577	1177	549	1027	409	710	671	411	662	392	998	533	514	1280	902	930	1231	596	341	526	899	441	326	635	2742	554	394	1082	669	737	421	405	202	308	534	843	550	469	487	408	339	381	492	311	240	309	387	399
1765	293	200	313	199	274	190	243	228	402	207	113	162	67	191	606	207	185	3501	1033	316	381	241	260	251	163	620	290	309	506	294	328	189	184	139	60	319	179	1790	621	70	7338	714	208	188	207	1001	225	163	54
1766	37	76	161	-243	264	-18	228	143	49	-126	64	9	-4	115	-875	276	45	1754	-1007	5	-23	-52	628	70	-43	900	118	-61	97	-25	277	-76	40	110	115	128	-38	282	541	23	-12	27	-101	60	-144	44	83	35	125
1767	-77	41	105	129	-109	17	-30	22	-33	25	14	-61	137	-29	124	-24	-77	-162	-361	74	-77	9	114	83	35	83	27	-54	53	91	8	12	145	-6	-40	-90	-32	117	23	109	72	-59	-7	43	19	-83	-1	28	29
1768	-708	-514	-336	-431	-80	-419	31	-86	-312	-68	-106	-198	-307	-267	-258	-470	-389	-582	451	-27	-279	-205	4	-237	-137	-2223	-189	-103	-425	-586	-353	-401	-72	114	-60	230	-320	-32	-430	-282	-145	-520	-129	-351	35	183	-675	-130	85
1769	454	516	465	332	778	532	468	684	732	344	486	220	329	288	879	118	675	1882	108	290	428	663	588	592	512	516	271	613	813	200	531	501	441	631	548	510	458	563	468	592	314	455	838	504	958	492	717	319	495
1770	-58	-118	24	-93	11	-31	-7	36	3	-58	18	26	-60	60	76	-61	-130	-1128	-823	-44	9	-65	-9	-40	-40	-221	51	-103	-17	-100	-101	-32	-109	-2	-58	-123	-10	65	-87	19	-80	-132	-53	-60	-1	-141	-111	-25	-74
1771	496	279	134	240	-168	260	-115	35	-163	151	272	29	-56	189	1781	349	116	438	-383	202	111	377	-112	0	-289	-809	282	-54	196	-148	725	0	241	-10	110	56	152	380	-167	39	65	318	29	306	272	185	86	15	139
1772	-51	-239	-108	-173	-844	-93	-249	-196	-30	-214	-207	-196	-222	23	460	-293	-82	-1499	-1558	-43	-197	-105	-172	-228	-177	-733	-224	9	-397	-117	-213	-175	70	-58	-30	-81	-65	-10	-264	-189	-214	-236	-168	34	-269	-22	-128	-196	-115
1773	51	-11	193	221	525	105	163	130	172	17	137	89	131	73	490	198	314	1998	1125	130	25	118	50	73	198	1624	1	153	193	50	156	161	121	125	25	184	77	327	-42	164	39	194	-19	127	89	75	43	145	37
1774	1106	1578	1125	2255	1509	1527	2432	2178	1430	1677	2374	1892	3753	1619	1140	1426	1086	-498	2355	2119	6690	1759	1091	1848	986	1255	1499	2465	1275	2448	6190	1724	3363	1797	4512	1520	2941	2322	1850	5947	1747	1636	1031	2484	1093	2002	2356	1398	2092
1775	1603	1662	1031	1522	654	1822	1050	1074	1082	1366	1024	832	1037	1109	5313	946	2813	4548	1835	785	623	1100	1296	292	651	7716	1766	1414	3986	1947	2425	1256	779	694	748	1149	1356	2326	1589	1169	1344	1151	1674	1252	652	839	613	1011	861
1776	92	45	21	91	112	24	175	112	53	32	77	95	88	132	791	37	318	121	315	85	19	216	216	212	51	87	109	199	545	87	165	115	132	46	108	62	55	797	-111	99	134	345	79	69	48	228	143	107	-51
1777	1266	226	1789	512	529	526	226	709	2095	1042	1470	2615	385	914	2310	913	591	95	933	1221	442	1733	1470	769	1762	-328	204	914	322	-150	1998	51	2773	3336	2059	896	1604	742	806	2471	242	5928	921	1730	782	1739	3331	219	962
1778	47	53	41	32	-84	84	88	24	81	78	19	31	60	33	279	29	-30	258	-1014	-55	72	54	-11	45	63	192	84	132	138	254	45	48	-51	59	28	129	242	160	39	31	78	4	-7	80	38	75	129	2	161
1779	1358	434	1065	336	754	812	632	904	1600	361	1446	901	399	1517	606	665	652	3341	1308	832	517	720	372	199	544	1046	1296	731	144	341	950	786	369	613	1102	189	350	2013	907	912	1345	2030	843	770	855	283	399	680	766
1780	-344	21	-362	-336	-359	-131	-109	-197	-237	31	16	-36	37	-71	-647	-186	259	-749	-1135	42	-111	-85	104	28	52	-575	25	322	-114	228	66	-266	-59	-29	9	-6	-121	-31	-428	-226	-181	-146	63	-193	24	-21	-296	198	9
1781	1829	803	910	532	386	1100	493	712	1487	1057	955	826	1542	677	-20	460	276	974	1869	2847	1894	1620	431	1803	1321	275	267	615	-100	826	406	632	920	1808	717	2822	505	267	491	498	785	904	824	272	1324	971	1039	285	602
1782	-278	-58	-69	-234	40	-1	98	-182	-96	-119	-24	-63	-177	-52	-668	-38	-139	-2248	-1433	-155	-5	0	-97	-110	-200	-2501	-108	2	-30	-206	-95	-203	-46	-28	-13	-338	-71	21	-272	-154	-83	-110	-238	-31	29	-269	13	-7	46
1783	51	497	-56	-15	-124	-58	113	-69	54	79	334	-33	79	-46	543	9	-3	275	1190	201	5	55	217	-5	95	20	142	10	256	17	-85	216	0	80	81	89	-104	-59	2	-92	32	1223	57	-55	178	131	212	-10	62
1784	2206	727	1803	2009	1913	1755	4533	2187	2703	3398	3952	3916	3931	2772	1558	1464	1749	2384	4169	4577	2993	4472	2570	2677	1569	3660	2599	422	1427	3344	3252	2508	2392	3450	3669	3109	2689	1286	1523	3658	2965	1136	1363	2328	2426	1069	1716	3531	1922
1785	44	100	43	38	45	30	38	-7	3	46	48	131	63	89	985	47	169	706	-73	20	22	30	12	145	126	70	52	124	171	60	47	55	91	109	11	36	82	7	224	48	42	-58	31	-38	79	123	67	73	108
1786	142	133	101	265	-312	151	-40	-37	-115	111	82	38	84	217	-1332	9	32	429	-129	-56	2	-104	-231	-22	-143	-391	360	-508	223	-144	79	317	38	-109	108	162	259	28	-250	320	0	-251	96	139	-74	220	-133	97	146
1787	-145	355	-173	-178	5	-75	-115	-138	-48	-18	-59	22	106	-6	-527	-62	-163	156	-51	-132	-92	-62	-276	-52	-12	-205	-45	-81	-192	-159	-170	-142	2	-90	-67	-29	-90	-207	161	-84	-67	-115	12	-47	-70	-84	-136	-109	-67
1788	338	422	511	257	416	630	585	368	154	340	338	505	356	318	427	275	87	-464	334	78	549	739	412	441	373	162	365	488	301	310	153	424	372	358	280	574	313	542	193	287	572	329	556	297	595	335	479	278	307
1789	2779	2244	1976	2590	2347	1472	1584	1874	2238	2030	1440	1790	2187	1552	1799	2501	2450	-11042	-3944	1728	1916	2430	1630	595	1069	2768	3001	1209	3061	2831	3113	2170	1914	1148	1724	3694	2381	2460	3708	1642	2511	2287	1214	1723	1758	4477	3061	1022	1550
1790	-1002	-835	-824	-366	-498	-608	-534	-841	-578	-1334	-1339	-1249	-892	-962	-1538	-506	-1327	-2360	-1074	-574	-215	-86	-1282	-360	-1160	-218	-447	39	-1157	-765	-1507	-314	-605	-344	-290	-679	-546	-433	150	-1389	-559	230	-436	-80	-304	170	-1010	-254	18
1791	-64	75	94	79	219	17	31	-7	-24	89	-30	14	123	-110	1084	-37	-100	-282	-227	86	141	57	46	53	-27	137	192	107	43	-54	110	39	-435	59	16	64	4	176	-152	33	48	128	-102	22	153	72	11	263	52
1792	263	656	615	518	-228	484	222	342	407	285	418	405	158	416	2008	286	1028	-1821	397	91	200	492	483	284	347	695	312	443	641	684	614	657	282	91	326	249	267	474	643	363	425	301	112	386	318	376	24	242	283
1793	1859	1996	1450	1057	3001	1378	1139	987	1808	1645	1748	926	1350	1696	2629	1644	1858	1793	1952	1446	2832	1428	2198	1969	1431	5262	1069	1041	1939	1146	2458	1706	1761	1149	1236	1270	1400	1009	2799	1949	1391	1407	948	1414	3118	1755	1057	2531	1093
1794	-44	-76	6	-11	-26	-150	-64	106	-9	64	-105	-53	95	82	1327	98	167	24	640	-9	18	29	-14	-74	-7	184	26	-81	100	275	129	226	124	-51	13	45	42	152	189	15	-45	-67	176	-39	113	155	27	113	24
1795	1286	1899	1889	3125	1236	1264	1142	1007	1459	3162	1513	687	814	1218	1323	2122	1027	2061	839	3124	667	908	2473	1525	1512	1142	831	689	1326	2040	1719	1361	1555	1751	1309	2114	1905	1290	1957	1178	892	1551	1080	965	982	1370	1152	938	1940
1796	10930	9472	17202	9271	9319	7690	9267	8705	12828	10027	7685	6705	14728	13172	8024	17719	5500	8121	11487	17019	12750	5178	6510	6944	7749	7838	13846	3939	3379	14425	21327	10522	5653	3433	7497	8748	15696	15528	28538	8763	10344	10103	7453	19159	8652	31611	16139	10060	11329
1797	-75	109	47	18	14	44	21	-20	-61	23	57	-1	20	-10	60	-65	19	491	-25	44	48	-15	51	33	30	30	-22	44	25	17	-9	139	16	-10	28	-11	68	-128	-49	93	34	-75	31	-13	-2	-35	-36	-6	37
1798	1615	481	1815	1595	1178	1285	1067	747	1202	1128	1173	1638	1535	1781	1869	1058	1463	753	1773	987	1922	1450	1295	1856	317	545	823	885	125	937	2598	1495	1903	1942	985	921	524	1757	1607	537	1077	789	922	989	494	980	1740	1006	1064
1799	8844	13554	9839	16405	21902	10438	5405	11108	6078	7534	2407	6371	11222	14531	36230	22257	36588	9925	7058	5711	5610	4354	2882	7629	9843	14035	18350	7082	9345	18144	10915	8903	5340	4386	3469	5494	9529	11188	22255	11502	6667	8324	9355	6955	12491	10531	5606	6120	9371
1800	3824	7697	6714	8624	12964	4025	1566	4694	2607	3453	740	2489	6156	8993	13956	14903	29391	4416	477	2879	3697	2042	1431	3868	1891	6942	9066	2283	3150	13082	3469	3418	1864	1817	1166	3646	2152	3402	6367	3400	503	2396	4308	1228	5049	4726	1942	1926	3940
1801	101	-139	-42	-119	155	77	-100	-39	40	54	-39	27	-41	-40	-536	-141	8	562	612	-123	-51	-66	-46	-82	-72	-15	-31	-102	-186	-166	-114	-17	-54	-44	-4	-43	-119	-122	-264	-75	-37	-161	-19	-1	-71	-127	-21	-72	-116
1802	243	-13	128	68	257	266	90	32	9	136	102	197	95	174	886	212	95	-932	-31	40	118	-6	27	66	30	547	107	23	399	102	264	42	200	29	71	52	72	-17	-31	143	205	109	240	118	77	382	95	115	61
1803	215	170	68	257	721	65	127	175	60	66	111	142	201	146	1937	199	239	1357	931	66	11	127	86	127	-12	-31	150	126	1348	131	280	278	123	15	77	134	186	219	167	58	160	64	105	52	86	15	28	164	119
1804	141	-55	236	402	335	155	37	-41	21	212	182	167	141	64	1264	285	208	1127	379	312	71	186	523	234	377	787	195	-8	81	26	775	-104	186	26	101	235	234	310	545	-26	166	384	52	112	96	268	211	248	170
1805	-65	24	17	-273	-197	88	-10	-294	7	-58	-66	80	148	188	-513	277	-47	-535	210	134	-82	127	23	131	-1	537	-96	-203	-2	-97	-92	-58	-196	96	-91	155	121	-40	-92	-85	271	75	-134	163	19	-53	-79	-101	-2
1806	-113	-153	-87	-230	-200	-63	-101	-204	-44	-196	-3	-138	-282	-72	-749	-141	-84	-610	32	-90	29	-90	100	-137	-91	-842	-74	-98	140	-130	-91	-159	-8	-130	-108	-79	-223	-50	31	-244	-82	-116	-72	-135	-58	-140	-141	-44	-57
1807	449	-41	6	-23	351	5	45	-92	139	218	167	-48	43	215	-555	173	380	1414	1147	179	50	119	-79	67	81	-46	113	181	416	148	171	-71	108	10	126	149	244	411	-416	79	70	-66	153	274	172	188	143	112	57
1808	2897	2394	2450	4242	3493	1686	3181	4204	2350	3820	2325	2623	2300	2603	3319	2826	3375	7614	4629	3891	3190	2243	2889	4109	3618	4369	2923	4598	3108	2676	2821	4928	2576	3374	3673	2896	3694	3099	4525	3174	4063	5801	5412	3358	2190	2145	3114	4327	5497
1809	702	928	416	8239	969	416	2079	2559	1194	3986	1765	458	826	326	-53	2278	1836	2240	658	502	646	738	701	5105	3549	557	494	1584	559	578	901	2843	1307	1269	1005	3555	746	68	859	964	343	479	684	1474	634	317	581	1214	1334
1810	1207	985	1434	1446	728	776	1237	1158	1171	674	1137	1155	752	1131	1843	790	1101	3498	1729	801	1064	1392	830	1088	488	1997	789	700	1226	799	1414	966	927	866	667	1001	918	1485	2326	1017	867	1001	784	757	666	657	612	783	827
1811	90	21	111	174	57	5	177	50	99	172	79	44	38	23	-137	139	-39	1332	256	76	120	69	398	211	168	-47	19	103	125	183	33	38	-5	90	119	126	68	-40	185	100	72	368	33	29	47	103	120	51	77
1812	218	133	289	404	442	21	324	445	329	716	514	246	525	312	13	363	427	355	120	739	351	323	2601	476	614	801	553	839	241	472	802	1000	1991	1446	1899	579	465	677	1181	502	934	1246	702	529	531	626	715	482	761
1813	215	49	28	130	160	-123	-3	30	65	40	101	67	51	147	-573	182	-13	2144	360	67	-38	195	87	-62	48	606	128	-30	-179	-22	186	-10	177	0	265	-103	129	104	-222	8	128	-146	-97	86	142	226	53	84	166
1814	1017	1376	2473	1511	531	1256	2111	978	2001	803	783	570	1128	3528	-203	778	1475	-1361	1078	936	1440	745	702	1293	1447	1777	872	928	3296	2171	2201	1089	2185	1274	2684	1383	1862	2292	5109	3803	2129	1058	689	2316	1184	673	1058	3041	1709
1815	1045	373	1961	243	614	933	399	979	955	455	870	625	236	1363	1430	1607	195	1066	301	575	317	605	331	402	406	-234	1017	271	214	143	615	525	417	433	1228	339	311	534	143	842	451	658	404	593	700	288	489	702	342
1816	90	30	75	23	-266	49	16	100	59	11	64	-39	115	57	-625	108	37	588	-144	46	18	40	53	94	16	198	-1	19	-25	-12	-8	68	2	55	23	50	-24	21	-108	107	49	116	85	60	-17	-67	-10	5	0
1817	160	-45	137	-41	-26	174	150	197	3180	6	112	94	199	150	-70	280	51	150	902	1161	-2	-16	7	-25	-13	-463	91	145	410	171	190	163	71	-50	114	27	160	262	313	149	179	-53	56	125	-88	-20	75	-28	43
1818	257	-30	-17	356	490	181	107	348	82	17	56	53	57	-135	611	200	67	1556	2840	36	3	114	31	-135	275	1699	120	238	734	1	122	311	115	-19	-8	161	89	291	282	264	88	377	89	167	28	-70	4	100	55
1819	844	1069	1140	1145	1431	704	406	1054	329	664	328	1408	471	308	3648	1886	1158	2561	1957	742	689	1739	565	612	820	2060	533	927	1660	1310	786	1133	1058	913	416	928	1049	1490	1815	1082	1685	1561	907	572	1044	1195	569	463	450
1820	7441	7749	7140	3170	4432	4198	13141	4136	11947	3224	7619	12613	1976	3305	5768	4176	3352	6317	10143	2358	5271	8959	13221	3830	6050	2134	3148	6131	4673	5483	1968	2888	1917	10759	4910	5851	19380	3730	260	2618	4214	9631	4937	5478	11555	3311	2140	4346	2405
1821	-75	65	92	59	52	-94	36	195	-6	-173	10	12	-111	-48	-3112	1	212	1126	532	-48	-66	-80	114	48	-63	587	35	155	14	-95	125	184	-19	38	110	-294	91	103	292	-159	105	-143	97	-7	21	201	-56	184	-33
1822	15	471	119	240	201	9	204	-55	71	154	85	182	233	24	748	-122	205	1000	516	121	132	273	-13	169	16	1512	243	-67	66	123	274	-15	-13	103	35	114	-6	-119	631	8	286	390	152	241	166	304	211	-53	185
1823	210	125	218	198	273	184	166	714	475	309	259	271	375	443	-1330	307	243	142	1310	231	758	190	498	373	422	44	157	166	-304	155	206	428	125	371	300	88	115	126	207	229	197	232	137	149	147	141	248	210	327
1824	15	461	619	-48	-138	-129	27	-104	-22	-64	7	878	-24	848	561	100	-2	391	192	-44	-12	337	32	50	9	167	-116	151	-125	-34	-68	-111	28	39	53	-123	-133	207	103	-22	-102	1	-21	-83	-47	-18	-43	37	-27
1825	85	77	202	268	-1	219	142	235	197	146	79	280	149	184	1208	113	224	1116	88	94	273	330	205	237	215	-21	62	238	304	150	91	117	201	156	125	-10	141	145	350	67	81	152	109	83	276	136	126	81	-9
1826	35	310	-23	411	-185	493	491	-21	-77	229	122	259	-30	-45	78	2	-121	379	287	-68	236	-185	1006	408	1530	-144	52	1634	-137	31	426	235	899	18814	221	10	221	34	106	1362	331	4964	844	103	310	1110	408	-17	149
1827	559	435	639	390	339	309	157	288	512	825	860	376	564	405	14	488	554	1739	2238	523	481	702	646	543	775	1284	511	290	690	381	550	366	1203	892	784	608	565	373	1088	673	513	176	327	345	946	987	735	654	506
1828	337	314	233	77	-2	-109	122	64	151	789	279	130	649	61	2385	640	116	-1125	102	293	189	45	915	577	353	888	325	260	172	85	55	-5	-58	448	126	293	353	146	356	1	68	91	219	88	312	1193	294	277	625
1829	360	526	490	777	199	1472	439	307	589	1414	807	898	1488	342	-646	301	321	2424	569	1163	1428	1080	910	1879	815	203	276	575	382	836	359	822	467	703	505	827	553	210	89	259	443	125	454	233	804	1661	579	827	1058
1830	-4	84	74	2322	174	158	468	400	100	501	548	120	114	87	1403	641	382	1271	-176	86	41	79	905	801	917	491	95	1049	251	289	385	504	361	734	580	611	301	899	-85	168	1356	1078	251	577	130	94	1001	220	929
1831	216	124	860	1935	-177	143	1203	589	25	2049	216	1100	-105	-147	-735	345	-81	-15287	-1991	-132	-107	402	-61	422	1685	-3053	-222	549	-402	-457	-288	215	379	841	135	-421	876	850	778	-363	1259	181	437	448	-536	61	-119	166	1126
1832	1118	1019	904	603	134	572	632	626	704	1078	1066	1336	1067	1437	712	242	529	-94	891	543	2135	1256	1004	1097	2563	650	311	697	974	665	963	933	1272	1862	769	1009	748	85	488	760	746	372	1143	372	342	1102	786	1074	774
1833	879	960	754	853	818	1018	2660	424	395	402	516	566	1158	376	2864	1367	720	2244	790	686	474	526	371	1059	819	4314	718	800	1494	1335	615	255	673	622	624	1064	756	724	1175	601	649	1446	1036	759	690	652	462	667	361
1834	78	57	44	170	273	120	246	203	90	114	83	91	115	176	287	63	79	2843	569	83	205	75	201	139	138	184	90	233	244	326	108	53	120	79	34	83	98	148	269	89	71	186	222	107	112	200	226	41	38
1835	283	410	669	343	294	615	313	234	430	694	485	540	434	334	565	458	375	574	1001	830	667	513	460	800	324	109	246	625	344	419	825	488	488	388	887	494	454	395	578	483	420	340	290	523	455	634	471	596	600
1836	262	624	383	684	676	642	390	531	397	666	595	577	932	690	294	735	377	751	904	393	724	830	240	1342	457	353	308	647	581	921	436	458	391	258	251	262	671	478	362	145	460	401	322	372	635	346	471	379	534
1837	162	69	178	250	191	7	229	174	150	303	157	123	269	41	66	-83	110	-378	489	167	114	122	768	378	167	-50	24	206	168	161	117	179	171	631	147	302	238	180	149	140	199	142	316	125	183	494	315	286	154
1838	485	345	677	187	-2	435	371	173	430	1001	1128	232	343	284	-180	366	305	1577	913	594	444	640	932	824	470	654	456	460	551	514	416	313	966	1110	805	557	308	467	597	420	275	433	481	316	223	582	1087	395	389
1839	793	927	788	2076	1909	1042	1789	771	1410	1309	991	1677	1246	1819	1836	1643	1519	952	2642	731	1411	1142	1279	1129	1597	3994	1156	601	1713	1208	1161	697	769	1049	532	748	2884	1893	1074	511	728	1311	754	1123	761	442	873	1732	1642
1840	505	966	627	3060	1572	618	1650	2475	1000	1332	1179	382	608	354	313	1991	1779	2013	1390	287	469	608	457	1698	1992	505	563	949	799	827	526	1746	619	477	634	589	719	1286	576	322	589	892	533	918	342	324	816	799	1465
1841	2115	1926	2365	2997	2101	1474	1764	1760	1906	2368	1304	1974	2649	1662	3381	1846	1544	3374	2870	1367	1266	1667	1886	1426	2213	834	1903	1690	1340	2340	1727	1729	1984	1660	1168	2103	2378	2214	1420	1418	2039	1863	1201	1638	1848	1126	2096	2606	2083
1842	64	45	100	68	-52	-11	29	-6	61	48	67	-64	83	78	-312	-84	15	267	390	-6	88	18	27	76	118	204	29	97	196	175	2	42	-6	71	21	30	179	82	-10	104	45	101	127	90	156	114	102	46	-34
1843	485	254	22	244	619	282	236	214	461	597	823	676	815	737	326	784	166	-317	172	470	536	410	218	381	227	240	202	92	7	142	119	461	861	553	223	462	312	869	441	-18	404	570	298	597	215	364	428	1124	824
1844	225	375	973	676	136	743	798	830	928	485	555	739	393	358	931	879	-9	-32	604	2847	747	599	115	688	523	-189	957	806	376	414	67	825	454	844	381	979	335	632	584	622	729	931	892	629	385	381	540	538	842
1845	-296	-408	-297	-398	76	-187	-392	-277	-244	-253	-242	-196	-136	-322	337	-332	-113	-719	-280	-231	-295	-114	-210	-333	-284	-444	-204	-241	-435	-159	-405	-628	-231	-132	-130	-353	-321	-175	-695	-366	-128	-209	-388	-212	-137	-320	-239	-210	-196
1846	503	322	662	654	629	486	559	901	446	840	731	896	543	565	145	686	709	-58	1100	507	1269	1179	891	1282	693	798	407	487	590	564	499	719	709	971	460	890	485	794	660	836	889	1590	862	1013	558	523	568	483	463
1847	7	669	36	14	47	42	24	85	92	-21	4	13	-14	15	-1183	-310	75	-1222	-423	-38	-45	11	-72	14	-10	-20	1	-13	7	86	8	59	-1	0	25	80	-14	106	-76	33	63	55	25	18	-19	105	-52	93	-143
1848	-7	36	1	-35	160	48	2	-69	-15	-7	-15	9	7	-3	-651	-109	-17	718	-40	94	29	-27	75	75	-25	-101	5	-4	99	-54	-27	31	17	13	-37	0	-73	-12	-25	-92	-16	-62	5	-11	-8	-17	-17	-3	5
1849	-14	-140	48	9	-118	-71	-98	-75	-37	-33	-47	8	-59	-32	357	116	104	265	48	-67	-58	-50	-68	-31	-60	-77	-90	-38	88	-120	-100	-102	1	-44	-11	-103	-47	124	-266	-144	7	-10	-63	16	-105	-9	5	7	-67
1850	75	-302	-491	195	-274	-373	-28	-266	-16	-217	-452	305	154	173	-1166	42	-589	-5879	-4358	235	-126	400	246	-87	-322	-4263	-483	-280	-1499	-622	-283	-213	23	117	342	-229	-5	-558	-104	211	-202	69	249	13	490	-134	-78	-302	94
1851	205	-253	-66	-49	-71	-69	-94	-60	44	-71	-122	-292	-151	160	-1875	180	21	-1455	-769	116	80	-61	-7	-503	-272	467	368	1	-1027	-37	94	-30	-165	-144	94	-203	-240	121	-392	-258	125	-207	-124	-108	-149	104	115	486	-245
1852	445	604	300	780	15	517	544	503	549	674	876	935	737	482	3021	802	622	1767	240	513	833	1182	456	323	568	2138	785	155	1550	698	817	-120	405	140	420	799	747	883	308	331	378	749	510	737	535	417	383	594	562
1853	728	1230	860	894	698	1227	566	818	621	735	1191	605	1104	398	373	466	959	304	125	1331	637	732	1004	513	1074	281	560	1098	1443	1313	1407	360	821	496	380	745	672	1250	1563	430	781	724	898	672	2025	506	761	532	629
1854	227	322	261	104	251	176	102	285	234	142	151	135	227	157	75	34	203	1439	693	52	174	51	86	291	212	143	48	273	263	265	816	271	155	142	10	75	70	276	211	177	215	145	117	68	108	308	111	142	38
1855	804	718	556	237	86	475	45	263	683	150	124	288	156	243	-111	400	388	-158	780	467	624	217	881	509	901	164	168	553	965	745	252	455	290	641	181	933	151	305	312	229	337	214	241	262	373	783	215	249	306
1856	2695	1874	2097	2116	2502	1779	1428	2293	1592	1893	1307	1765	1176	2391	4948	2139	2508	4805	3594	1289	1856	961	630	303	784	1827	2620	1684	3557	1554	2934	1504	1658	985	977	1355	1422	2644	3370	2287	2012	2618	1691	1018	1902	1326	1107	1407	1880
1857	589	618	763	996	434	781	785	1112	518	911	1183	714	804	701	847	957	650	2275	925	889	1023	594	583	998	691	560	712	674	755	544	315	872	870	1904	627	981	557	766	1483	523	529	1349	1286	328	460	912	574	614	695
1858	100	363	402	-169	567	229	-75	-219	301	127	249	196	330	36	3307	439	-48	80	-584	284	243	102	232	400	334	-862	97	77	221	198	-203	-12	73	12	146	297	34	-79	-105	-56	-106	29	224	149	70	143	31	19	444
1859	1219	1035	1028	1005	1046	813	649	538	602	420	563	685	822	671	2206	1102	778	-1355	570	545	572	928	1027	249	476	4096	1103	684	2033	871	1177	1070	629	429	395	966	1055	1042	1744	609	965	1069	702	795	944	432	472	521	746
1860	115	-20	134	22	-411	93	62	106	173	24	193	150	4	122	-129	-189	53	524	94	102	273	162	-19	-87	-87	100	36	121	40	57	67	24	181	363	131	-19	36	172	67	-97	-14	157	-75	-14	13	76	76	53	-25
1861	-2614	-1460	-1689	-2728	-1418	321	1695	532	-277	-120	-550	-415	-1412	2117	-5990	1403	100	-12669	-5621	168	-987	-479	-775	-761	-1988	1405	-726	782	-2357	-2883	482	-2565	-628	-54	-962	-865	145	-1826	-3599	-1063	-3033	-848	-177	173	-877	-1086	-303	-1287	-1538
1862	749	273	639	223	484	796	1065	456	963	518	716	868	468	1094	631	505	550	62	262	908	591	708	446	525	359	419	560	244	638	785	715	607	482	686	1049	331	297	397	516	1207	618	235	302	418	804	316	349	994	501
1863	-77	-95	-72	40	55	-80	24	-171	96	-31	-3	-18	202	-43	896	-312	-7	2128	222	-163	218	-21	86	-44	182	782	-70	-67	-102	-227	135	-175	191	14	-51	-80	69	95	75	32	-12	241	-83	-172	-119	62	64	-13	-71
1864	216	120	48	110	-38	163	153	102	129	190	24	103	53	107	575	51	42	-48	-11	3	-11	117	225	125	102	364	65	259	377	252	188	238	191	76	97	114	147	154	-38	207	72	81	94	52	80	147	141	12	115
1865	-76	-36	-47	-66	-228	11	-19	-101	-27	-26	-47	-47	-27	-54	148	-66	129	-1762	-595	-86	-26	-161	-96	-14	-171	-398	-2	11	-183	-50	45	-102	5	147	-87	-82	-24	-122	371	12	-39	12	-29	-19	8	-224	-133	-51	-31
1866	-714	-152	47	-187	-687	-375	-271	-424	-577	5	-75	-184	295	-431	921	539	-181	-2485	-2256	170	117	3	0	-75	162	-4844	89	128	-965	-56	180	-17	-82	-15	51	-215	-213	-166	431	45	223	244	-308	-238	267	264	185	-21	-252
1867	52	-241	119	91	-490	473	250	-443	82	-350	99	4	162	-170	-19	-348	48	-4495	-380	-317	-208	159	171	-192	-34	-410	166	350	488	217	144	526	147	-316	23	-209	-250	-362	350	70	275	-197	6	196	-446	-9	38	-370	361
1868	335	206	290	203	151	468	250	165	363	146	72	157	-57	376	1019	268	103	788	-149	200	156	95	648	147	174	-147	190	266	290	138	166	315	267	157	71	92	121	300	-72	240	302	309	202	219	164	203	34	170	167
1869	-1160	-1198	-915	-1578	-1374	-673	-1498	-1643	-1392	-491	-863	-1262	-985	-772	-3216	-1486	-608	7844	-5211	-728	-753	-51	-1282	-929	-843	-5964	-727	-538	-2036	-1120	-1945	-1198	-591	-777	-676	-678	-861	-177	-1697	-1415	-903	-720	-703	-581	-604	-1281	-703	-774	-511
1870	144	7	-28	22	80	78	101	-17	-67	1	-12	10	59	55	-431	702	-180	478	215	-27	-40	5	-95	33	-44	-67	-26	-3	358	-33	-96	75	-13	-16	-70	-114	45	-33	-66	-48	-153	16	123	-68	18	-31	-9	15	-24
1871	1971	2141	2801	4247	8190	3993	6746	8801	5088	3235	6825	11156	9330	24050	2340	3954	10226	10722	4449	2905	3427	7702	1780	12222	4650	8884	1898	4113	2949	4095	1308	1913	1019	2819	1506	693	2543	1947	1570	1365	2651	1553	2486	1852	3057	1292	1152	10645	2805
1872	245	97	127	54	398	193	183	56	88	119	68	10	87	138	1058	-222	337	-126	292	327	-42	138	284	34	444	-5	200	82	-159	20	241	180	26	150	23	181	87	407	190	101	74	298	47	318	-23	533	250	-105	187
1873	157	200	-11	184	82	68	275	63	79	162	101	179	1	128	574	116	-101	100	177	210	134	256	83	179	186	-305	59	65	496	180	161	161	133	124	185	57	230	203	571	103	254	271	141	198	88	95	229	148	96
1874	1253	1570	2496	1205	840	1053	1505	2434	2780	1445	1006	1369	751	2696	1351	1477	380	1408	1138	1434	1713	770	1780	1746	944	818	926	895	344	1366	1324	1770	1396	1892	1945	2315	908	1051	1899	2511	1410	1845	658	1951	1073	935	1051	2659	1187
1875	562	1273	1075	2379	755	906	1015	861	589	730	453	853	775	823	640	547	449	2562	3849	1209	493	524	1239	630	860	2752	745	1643	2358	1331	2642	2084	638	670	1028	811	2391	884	2592	1517	1508	958	1542	785	1519	1995	1269	944	1290
1876	192	226	152	322	62	113	218	302	220	190	308	-107	209	118	113	304	-13	-119	-113	49	115	197	25	272	433	208	177	232	375	260	298	356	196	105	266	257	74	208	104	96	-22	398	102	358	170	199	220	378	275
1877	-184	-145	-126	-20	-210	-606	-71	-285	-146	-108	-152	-150	-201	28	-1742	-115	-162	-3501	-2738	46	-26	-241	113	-118	-258	-799	-391	-472	-306	-494	-119	-309	9	-197	44	252	-595	-421	-540	-19	-90	-252	-410	183	12	-378	-197	-7	118
1878	232	6	57	599	-44	591	372	742	390	35	396	159	384	31	754	-28	-27	-1484	1896	295	219	517	306	69	63	139	118	16	265	197	211	530	84	319	345	551	285	266	-21	118	292	-36	440	303	139	544	620	183	331
1879	-94	-133	-2	-281	12	-53	-126	195	-95	176	-17	-22	128	-137	-1054	-110	-187	23	83	26	21	104	207	-47	20	953	-73	-63	-92	16	-216	-109	132	24	10	-7	-92	-155	-167	-99	-12	102	121	72	74	204	20	54	1
1880	127	503	428	462	388	231	385	497	303	346	373	381	125	393	54	522	54	1585	288	348	253	331	423	325	113	1228	404	318	494	259	495	543	462	321	320	312	342	694	619	374	407	658	280	680	137	457	134	735	386
[truncated: 5,249 more rows]
