# Supplementary material for: A Wrapper Feature Subset Selection Method Based on Randomized Search and Multilayer Structure
Source: Biomed Res Int. 2019 Nov 4;2019:9864213. doi: 10.1155/2019/9864213 (PMC6885241; doi:10.1155/2019/9864213)
Supplement: Supplementary Materials — Public datasets: details of five public datasets (had been described in Table 3 in the paper) which are the important datasets for classification with our methods and other comparative methods. Supplymentary Tables 1 and 2: description of two algorithms (LVW and Imp-LVW) which were compared with our method in Section 3.2. [file 9864213.f1.zip › 9864213.f1/public datasets/CNS7129.csv]

ID	1	2	3	4	5	6	7	8	9	10	11	12	13	14	15	16	17	18	19	20	21	1	2	3	4	5	6	7	8	9	10	11	12	13	14	15	16	17	18	19	20	21	22	23	24	25	26	27	28
1	-60	-159	-119	41	-165	-66	-28	-6	-106	-60	-26	-109	-111	-290	21	-38	-50	0	-87	74	-278	-109	-8	-221	-72	88	-150	-97	-93	-273	-215	-291	-343	-31	-27	-78	42	-167	-120	-57	-159	-143	216	-13	-58	-58	-101	-403	-92
2	-109	-113	-31	9	-57	-123	-42	238	-169	-90	-27	-80	-63	-181	-50	3	-36	-49	-135	49	-183	-133	89	-239	-88	-155	-72	-53	-87	-341	-357	-116	-131	-73	-281	-145	-381	25	80	-272	135	-49	-40	3	-11	-54	-123	-414	-24
3	45	-62	4	-256	171	57	-142	110	-39	25	143	-97	125	89	102	53	63	-95	-178	-10	-76	-202	34	-81	-63	85	-124	25	180	-18	89	-68	-119	83	148	113	116	-16	106	190	362	-126	-2	-27	-37	-58	41	-274	-37
4	22	-16	-11	370	216	-84	113	-103	170	30	-92	104	42	264	68	-49	-4	225	5	-81	159	71	-101	61	70	378	248	237	-60	353	362	44	232	196	46	-4	-370	-318	77	214	270	59	-58	11	-46	215	14	179	147
5	7	-160	-197	-302	-692	-129	-315	-311	-113	-48	-198	-77	-167	-130	-143	-130	-65	-277	-294	-141	-100	-160	-304	-122	-108	-460	-602	-109	-350	-159	-572	-193	-31	-107	-109	-233	-179	-746	-226	-536	-594	-17	-307	-182	-63	-159	-353	-403	-243
6	-61	-395	-541	-680	-381	-100	-399	-358	-286	-156	-361	-233	-226	-365	-220	-90	-355	-320	-403	-571	-340	-204	-480	-87	-261	-565	-612	-421	-1216	-224	-935	-340	-251	-146	-125	-196	-518	-394	-234	-274	-599	-98	-329	-507	-342	-314	-174	-786	-144
7	-211	97	-277	254	762	73	352	-40	-478	62	-347	-32	447	99	98	103	320	337	-621	74	515	-95	28	219	64	896	-183	695	-10	512	436	598	-248	-101	-223	392	-1005	251	338	-310	-159	199	153	-77	-71	-662	95	-335	852
8	-102	-157	-166	31	-6	-147	-248	-258	-86	-74	-142	-142	-133	-157	-71	-29	-63	23	-127	-66	-136	-118	-62	-148	-61	-381	-144	-122	-285	-334	-409	-92	-38	-133	-183	-214	-444	-528	-117	-157	-386	-237	-115	-94	-108	-118	-185	-503	-30
9	-20	15	17	186	44	27	104	-23	-70	33	57	-103	133	-238	-6	-4	50	-69	-12	21	153	-140	37	235	-13	139	88	153	82	-3	683	-6	-136	-103	35	6	264	310	-58	283	62	162	13	-59	-31	9	26	450	175
10	98	-8	392	358	216	10	195	244	-113	85	343	263	394	-205	41	-92	0	479	44	497	-17	26	248	29	114	-12	-81	406	345	478	21	-28	-4	39	183	129	338	268	162	174	246	115	182	259	202	22	86	-33	264
11	-46	-357	153	46	-279	73	93	167	-66	-78	134	6	47	-344	1	-15	-63	14	-154	52	-130	-61	293	-174	-17	321	75	7	597	68	-15	-33	-39	-5	-219	-50	709	486	296	-263	527	216	316	252	7	-197	-114	607	274
12	-257	-321	-465	11	-908	-334	-397	-892	-316	-95	-338	-358	-863	-441	-185	-236	-261	-545	-360	-1040	-867	-264	-624	-690	-74	-2081	-609	-682	-986	-1256	-1833	-479	-160	-232	-614	-547	-1958	-1953	-477	-579	-1180	-329	-918	-636	-361	-544	-577	-1668	-570
13	9	-511	-479	-293	-508	-84	-204	-821	-618	-174	-335	-362	-258	-506	-135	-55	-209	-407	-532	-511	-222	-239	-413	-116	-128	-591	-595	-255	-734	-140	-893	-580	-198	-165	-258	-138	-518	0	-205	-190	-386	79	-530	-297	-339	-91	-16	-629	-326
14	-37	-221	11	-72	-285	86	-24	-137	-193	371	-86	-175	-10	-200	-74	-55	-77	34	-313	66	174	-86	-90	11	-133	-85	-88	79	0	-140	-194	-137	-153	0	-156	60	-497	-226	-205	-195	67	-44	-361	-11	-24	-169	-55	16	-109
15	74	63	-113	-317	127	121	84	-674	44	48	-54	-17	-101	-254	-72	-104	-154	-66	-124	35	68	-39	-340	259	-254	371	-376	-17	-350	-227	1481	65	-167	-126	-31	205	582	1006	-114	176	-681	-107	-568	-176	1	54	37	271	-415
16	95	447	-82	114	209	118	-64	-540	99	73	-74	140	178	81	82	135	-31	158	217	278	361	21	262	-25	220	419	36	166	290	34	656	183	-246	123	-293	-41	74	620	-72	253	-9	494	15	-32	136	217	-43	86	164
17	-28	177	-119	-112	-324	-78	42	70	-115	-2	-12	-57	-77	-27	-33	-24	45	-72	96	56	-139	-44	-101	-132	57	-219	-75	40	-104	254	-99	20	175	-71	-101	-53	-476	578	-104	-176	19	-25	-160	-150	-63	-89	-34	-145	-75
18	-151	-48	-230	-248	-209	-79	-179	-174	-166	-83	-174	-102	-191	-214	-195	-178	-94	-141	-327	-109	-266	-87	-49	-223	-47	-654	-333	-150	-93	-353	-520	-629	25	-198	-356	-235	-793	-1349	-101	-391	-609	-145	-293	-196	-234	-288	-414	-400	-96
19	16690	22266	36398	28273	119388	25787	39800	55164	13357	18244	15657	9710	50937	6839	19842	28159	12886	55459	16948	65812	53650	9667	22715	34538	31336	50150	54918	43857	97183	63747	88278	8562	21747	22662	63252	43922	195564	162897	49612	53375	79516	39539	37634	27570	35868	11888	24775	45370	56228
20	-19	-700	-8	145	-127	36	4	-144	-264	-10	-18	-351	181	-2820	-34	-50	-112	51	25	77	53	-700	-25	11	-263	190	-124	-130	-175	-15	110	-834	-940	-69	93	-34	211	-578	-157	146	116	94	-205	-66	-43	44	-19	47	96
21	83	-804	-39	254	285	0	199	-134	-81	22	172	37	98	-1202	63	120	31	112	130	338	5	-535	65	-11	135	98	239	104	427	273	304	-388	-350	18	58	143	169	435	29	-179	96	57	343	162	18	79	153	431	-27
22	2	-51	-51	-39	50	-55	-44	-291	-3	19	11	-30	-130	-143	1	-16	-66	-40	-141	-28	-50	-5	-60	-211	-78	-79	-19	45	-131	167	-257	-62	-53	-54	15	-164	-52	-251	-149	119	-96	38	-31	-16	-7	-1	-88	-190	-137
23	19	-18	-19	89	88	50	51	-130	25	39	-12	-17	-53	6	43	26	-2	-14	5	98	100	4	-33	-21	-31	22	-19	25	257	121	42	21	-29	73	15	-9	201	-394	-104	-8	-19	-29	101	-11	18	-2	-2	-30	171
24	-41	-100	17	-233	-476	36	91	-144	-154	-59	-37	-121	31	-129	-71	-12	-166	-129	-105	-81	-100	-63	-138	-162	-177	-111	-117	-56	137	-375	-173	-300	-90	-78	164	13	328	-402	-189	78	-120	-42	-180	-67	-103	-117	2	95	-316
25	-13	-181	66	-100	324	27	-44	-97	2	24	-29	-34	-21	49	45	41	11	-23	44	292	316	-22	25	-41	124	-76	55	-30	137	56	173	46	-86	-11	78	-16	550	469	-178	35	-154	40	139	35	52	-36	1	-19	-30
26	-5	-110	-155	22	-127	-15	46	-140	-100	-46	-51	-111	31	-285	-56	-41	-57	-202	-170	200	-115	-70	-136	-154	-157	-174	49	-56	-87	-41	-168	-189	-146	-2	66	-6	-370	-268	-194	-54	-48	4	-232	-23	33	-128	-68	-274	-79
27	-89	-147	-168	-1	-254	-50	-24	-325	-168	-75	-172	-99	-130	-272	-115	-103	-84	-147	-103	-296	-207	-42	-87	-49	-31	-241	9	-194	-372	-311	-294	-143	-173	-177	-23	-83	-63	-192	-189	-27	-154	-107	-146	-106	-80	-94	-194	-397	-316
28	10	35	113	9	-76	-53	-28	30	-15	-45	81	84	125	107	76	-63	-80	-167	24	-66	136	-8	206	-146	161	85	-22	17	460	-53	42	-11	307	-79	74	-48	-391	67	173	-244	77	32	169	-6	5	-39	97	-288	61
29	-85	-70	-102	0	-152	-43	77	127	-48	24	-85	-27	-138	-40	-43	0	18	2	-21	-70	-53	-18	-61	47	-112	-232	-36	-168	-38	-11	5	-44	-4	38	-70	-201	412	16	-50	-8	-159	-49	-45	-55	-28	4	13	-226	-106
30	-35	-130	-82	-82	-158	-40	-11	-43	-85	-58	-88	-53	-125	-80	-47	-18	2	-106	-11	3	11	-10	-5	-177	-33	-165	-114	-25	-43	-163	-26	-21	-151	-73	-27	-120	-232	108	-152	-214	-72	-34	-203	-54	-97	-41	-113	-81	-243
31	-116	-365	-153	-614	-362	-34	-115	-597	-305	-76	-179	-154	-351	-254	-184	-149	-232	-196	-292	-504	-207	-153	-207	-217	-265	-483	-281	-260	-663	-45	-556	-326	-316	-157	-215	-71	-359	-184	-245	-198	-551	-261	-331	-272	-168	-260	-149	-470	-261
32	-82	-160	-13	-7	-44	42	-53	-77	-15	-31	-61	-58	-90	-266	-49	-29	-21	-20	-67	-172	44	-45	35	27	0	60	3	-66	-104	-3	-105	5	-32	-51	-70	30	-84	-226	10	-84	-203	-62	-54	-35	33	23	-29	-13	-79
33	-287	-4468	-428	-665	-1575	-439	-534	-966	-1325	-280	-340	-365	-498	-5588	-480	-300	-539	-1210	-655	-1071	-793	-1701	-730	-472	-943	-924	-838	-1640	-2186	-542	-1550	-1877	-3609	-391	-501	-582	-2138	-1458	-859	-617	-1296	-469	-977	-430	-768	-466	-429	-901	-563
34	-164	-3417	-153	-241	-476	-245	-279	-389	-812	-194	-212	-208	-325	-5386	-261	-212	-268	-678	-307	-585	-364	-1266	-314	-247	-588	-451	-474	-677	-1227	-410	-504	-1964	-1732	-226	-454	-242	-688	-410	-362	-266	-454	-299	-442	-206	-479	-212	-186	-324	-247
35	-122	-3709	-348	-330	-527	-365	-259	-506	-981	-210	-197	-228	-362	-5735	-279	-161	-278	-736	-291	-578	-636	-1354	-198	-452	-653	-181	-484	-1011	-1030	-265	-719	-2078	-2431	-127	-391	-471	-476	-561	-392	-380	-759	-248	-489	-111	-458	-231	-292	-293	-237
36	-31	-4218	-179	-237	-330	-92	-159	-238	-512	-193	-198	-186	-95	-3852	-177	-130	-164	-675	-43	-363	-334	-1159	-3	-100	-273	-177	-265	-1063	-263	-356	-283	-1628	-1741	-30	-258	-383	-741	-653	-341	-225	-1905	-237	-410	-108	-230	-75	-173	69	-285
37	149	-31	144	-233	349	50	19	-73	130	47	8	107	-15	318	84	101	140	173	107	282	106	22	212	136	305	371	196	-56	230	-75	273	165	19	81	39	64	656	67	90	46	449	4	51	-44	125	228	25	89	58
38	409	420	248	214	1734	349	184	446	828	174	166	342	860	1035	519	152	485	392	313	609	310	703	423	245	882	1277	703	329	657	334	1791	551	451	220	203	302	635	108	475	348	532	293	702	206	421	1007	237	702	96
39	-61	1820	1280	-183	1042	-68	-130	-20	896	44	-88	107	98	-298	1427	-155	324	-101	396	-398	-337	44	8	-92	-198	3709	-297	-237	-147	-318	1287	22	166	-125	207	-104	1386	2020	29	-141	2099	-164	-270	-94	-127	1711	-11	-167	116
40	-207	85	1071	-639	336	-343	-366	-469	494	-12	-208	152	-183	-251	1027	-235	127	-254	173	-433	-301	-24	-136	-270	-230	2994	-356	-332	-285	-1302	346	-261	300	-154	-129	-376	561	1425	282	-103	1359	-404	-237	-145	-269	989	-438	-495	3
41	-134	430	665	-170	279	-78	-157	-127	887	-17	-99	494	85	-462	2491	-144	545	-349	126	-211	-204	-48	-149	-162	-265	3318	-402	-288	-38	-611	346	-137	631	-220	-195	-284	-497	268	-16	-100	3482	-276	-137	-30	-331	1253	52	-36	130
42	16680	1050	15019	9938	10561	18371	18678	14985	15118	11909	13314	15373	5317	19909	13458	12246	16161	16120	17256	20719	14312	3941	13763	10552	14439	16022	10491	7308	11510	15602	13699	17455	11937	9969	1859	16115	6902	13355	12484	9905	22820	8437	15064	10603	10034	18768	9996	10879	10711
43	15249	1629	22192	10329	12848	20279	26603	13844	11607	14255	12015	11845	6311	12776	12675	18405	10757	8890	14162	23159	14345	8194	12461	10398	10129	15997	12462	6733	8994	14250	14108	9965	9920	12821	2681	16550	6997	19660	16260	11815	18355	9586	15394	13847	7728	11829	8943	9412	17158
44	16770	12616	29729	20654	17881	21164	28443	29913	15449	15371	16397	12808	8823	14639	17309	19234	15202	7723	17952	35344	17000	14322	17475	14839	1360	27783	14695	9710	26380	20751	20461	15202	16206	12924	10764	22293	9856	16415	24998	10923	36561	11654	28847	19642	11362	15074	16968	12253	25144
45	15142	605	18412	10990	28328	23022	24101	31235	15765	7740	15171	14071	17463	13614	14712	12735	15267	8908	9666	30045	23098	8996	21012	16267	651	7380	30540	10091	15127	16016	15942	12980	13500	18070	880	19987	17827	21009	23442	24347	27376	25071	28335	15873	31207	14365	18493	27830	11144
46	21050	2767	26632	16462	36049	27319	34839	43278	18524	11741	19821	16753	20209	14286	14913	18060	18185	14757	12082	40054	34234	16501	24280	20689	8947	12847	45704	25491	28331	21571	18585	16886	14493	23142	1863	26010	40906	32428	33130	30674	38844	37417	31987	23026	36431	16457	23462	45913	18563
47	14549	24762	16586	12198	25201	17746	25577	27126	14665	7601	13308	13791	7185	14306	15983	8321	13678	16354	15655	16136	23163	15317	16855	7837	35732	10838	41722	23970	14930	8912	6747	14342	16740	19047	16644	9570	22369	39445	12722	26184	27690	25380	22314	17229	24724	14275	13793	33584	10206
48	107	170	70	306	38	160	128	30	367	69	167	301	130	601	180	52	270	173	203	222	201	121	55	191	330	28	166	91	104	117	168	378	97	141	11	129	84	25	136	225	82	137	56	150	200	334	98	433	333
49	-19	-67	-44	-5	-57	76	-75	-43	113	-9	-11	144	-15	6	97	12	92	8	22	-24	-71	-59	47	-211	194	-9	39	-25	-295	-174	-168	38	-51	18	-109	-117	-455	217	-32	-87	-72	77	-392	-23	129	12	-49	-58	82
50	96	176	153	302	88	388	128	228	389	157	54	491	74	366	231	224	326	25	294	243	195	85	216	90	496	174	383	155	120	231	189	281	113	223	152	201	-423	1349	245	84	551	306	27	184	258	273	125	137	-58
51	1696	965	2502	407	3812	134	-77	627	1401	93	198	9932	87	-204	1650	87	738	2	329	193	275	92	106	154	61	4252	147	153	285	-75	2790	436	464	161	199	25	762	3898	120	62	2055	951	38	184	104	2129	110	657	515
52	5328	2366	9799	2757	13217	822	313	3837	3554	1252	1580	5859	769	575	3804	95	4979	823	1050	1096	2297	1137	1907	741	669	12392	1136	569	591	527	9511	2223	2184	815	22727	1169	-1122	6606	1478	579	10805	26016	230	760	889	5089	1258	3740	2982
53	-282	740	-11	157	1023	-43	-68	-228	360	135	188	633	-111	1075	519	83	307	571	530	-10	399	631	84	-31	752	28	225	-22	-54	-1423	173	432	481	275	82	64	158	2414	114	533	-174	-132	97	11	213	871	76	11	-945
54	373	1414	1450	585	3787	337	233	2267	3056	712	1354	1478	847	572	1535	158	1016	826	1604	1156	710	403	1216	682	730	2342	776	968	1342	725	1944	930	630	597	951	210	4096	5122	835	933	1460	424	1988	1257	556	1430	1095	1898	993
55	-185	15	82	-171	743	-23	-62	90	455	-34	-42	223	-39	-133	57	-49	-72	-248	327	-169	-390	-24	76	11	39	6	-271	-79	-317	-280	457	-28	-26	-106	27	-97	-84	427	-240	-133	-101	-235	-58	-66	-142	242	-162	-50	37
56	164	340	235	134	273	86	106	570	473	91	245	335	127	142	322	89	216	75	277	504	195	97	244	217	204	-149	16	168	115	337	105	287	418	-25	0	145	-190	1408	453	269	372	109	178	607	138	347	259	218	72
57	114	605	346	304	533	143	139	573	762	-11	483	357	-5	704	407	1	405	190	134	380	180	179	387	-49	163	689	242	-99	-10	-254	599	268	391	94	301	214	254	1056	45	146	140	74	474	506	-1	409	153	-5	68
58	-35	-291	79	304	241	-40	-122	734	243	-142	92	2	354	-184	-18	-113	34	-450	-159	652	2	-125	189	164	-206	181	-203	-125	-104	292	-84	-84	-35	-192	-129	-337	148	100	-197	283	19	-147	609	130	-299	115	147	-19	85
59	131	378	530	549	1061	139	68	1479	848	62	794	461	602	624	461	144	631	173	580	1128	467	149	738	395	297	1497	337	183	696	596	1481	800	633	254	125	87	772	117	341	748	628	62	1266	773	290	542	686	1215	518
60	212	117	366	628	273	43	142	1556	218	82	153	194	98	196	134	161	188	361	94	380	438	34	317	33	76	1137	379	523	372	330	846	162	373	219	215	-9	868	670	483	84	357	267	40	272	348	-101	207	324	-13
61	3	-73	-39	237	177	36	99	-6	133	-18	-39	-1	53	6	5	76	0	-37	93	133	5	123	57	57	11	143	242	150	274	72	162	25	208	3	97	32	-328	234	80	-190	207	64	97	-40	-16	68	-38	81	72
62	91	524	153	128	165	-7	133	107	231	36	56	112	15	153	209	70	196	75	297	197	133	129	192	27	238	734	307	258	317	-64	814	151	540	149	144	13	815	-368	133	-57	222	85	83	45	172	251	26	327	41
63	633	236	93	121	1004	57	202	70	213	151	38	121	111	1198	34	50	176	112	92	289	71	542	783	39	277	1535	1254	183	224	-83	289	114	161	19	-78	94	688	1031	18	10	440	111	155	69	384	364	16	531	106
64	23	18	-188	-42	-393	-118	-155	-13	227	0	-9	2	-39	90	153	-118	6	-161	89	137	-115	170	-11	-49	-59	136	248	89	213	-262	-246	-175	197	70	156	-124	-624	-335	141	-171	-14	-145	-94	-55	31	254	19	8	-120
65	-5	174	93	112	88	78	-26	-187	89	17	57	93	58	-6	41	103	138	43	241	21	38	584	75	43	3	123	55	15	76	-53	15	32	79	142	234	46	42	-67	157	40	-72	14	117	52	63	216	10	50	-82
66	143	261	86	439	-6	36	137	40	145	100	45	118	50	-33	47	29	65	8	120	253	307	153	185	176	112	632	39	189	312	356	588	69	154	224	121	-97	264	377	141	100	140	89	-146	118	99	170	88	526	305
67	956	1825	1411	2405	1201	698	1209	2167	1455	595	1240	951	980	2144	1099	818	1343	1695	2084	3144	2436	1533	1701	636	1680	3594	3228	2133	3195	1283	3378	2500	1243	1151	810	561	3504	2414	1694	2073	1992	1583	3079	1733	2172	2200	1465	4658	1515
68	16	269	-70	149	12	50	-35	-114	39	-8	-194	79	-42	-111	-40	15	0	8	130	169	82	37	-174	-65	59	-60	65	12	-32	197	199	64	235	15	-50	-53	201	-201	106	-106	-33	102	-216	-164	-18	89	-40	349	58
69	312	1057	339	757	1258	173	295	989	251	1	206	265	138	867	168	207	172	375	806	641	402	452	742	-3	478	1493	936	324	1057	402	1350	861	766	484	250	182	550	1324	547	304	918	332	668	572	606	469	444	783	587
70	-299	-695	-723	-745	-1442	-194	-645	-1962	-565	-213	-882	-400	-482	-739	-197	-166	-427	-1187	-308	-592	-663	-323	-1138	-688	-527	-1802	-543	-603	-1748	-1268	-2017	-785	-123	-47	-508	-346	-1259	-695	-413	-476	-1634	-51	-1643	-1100	-623	-472	-605	-1542	-422
71	-61	-625	-687	-893	-4473	-713	-357	-1086	-671	-236	-713	-200	-1342	-223	-437	-315	-165	-1346	-813	-659	-680	-211	-615	-1309	-309	-1465	-360	-753	-1496	-1636	-1602	-1216	400	71	-422	-360	-2773	-1676	-427	-1412	-914	55	-810	-631	-177	-496	-594	-2178	-1316
72	583	217	321	-166	552	785	466	466	428	40	508	724	170	1540	548	341	1200	459	569	853	932	1148	181	367	842	734	1247	779	701	72	178	414	1099	813	305	150	1153	1542	709	476	348	518	331	262	1090	985	317	697	-3
73	1983	-224	68	437	-362	320	-79	201	25	1	-4	120	-31	-151	120	69	95	-46	193	461	195	-64	-7	-257	-488	-820	-19	255	175	-79	-367	143	787	224	266	309	-254	519	-66	-78	149	79	63	223	48	-14	117	-22	364
74	-274	-425	-876	-1792	610	-276	-481	-2230	5	-132	-620	-195	-450	-408	-269	-49	-830	236	134	-701	-586	-166	-480	-630	84	-2329	65	-1050	-1003	-1146	-772	-895	938	-54	-775	-173	-741	922	-683	-187	-2200	-437	-957	-946	-324	133	-467	-1075	-415
75	31	-5	106	-177	-241	-14	-71	288	162	-132	123	-41	-15	122	88	47	-111	-80	30	324	-82	-37	80	0	175	-162	62	178	49	-140	-304	0	644	138	-62	-104	169	75	-34	40	-154	119	-221	-60	119	-77	38	-305	-27
76	-6	-58	-33	142	-19	-56	-28	20	55	-16	-75	-6	-55	208	60	95	165	57	-59	267	136	-25	-21	-41	-112	174	330	94	-186	-212	-136	26	1555	214	-7	55	179	285	-40	-29	-4	85	-20	77	222	-46	114	137	41
77	34	378	48	74	203	33	86	10	131	81	48	30	34	128	72	66	63	150	31	264	11	42	101	71	102	38	16	53	87	0	262	132	3498	159	19	53	42	519	152	114	4	83	151	11	136	113	122	159	51
78	175	802	1060	117	451	126	206	174	415	168	269	890	186	1564	674	389	1160	687	1099	430	577	1353	448	142	1435	657	1155	488	564	-3	1040	1026	3162	600	207	820	529	142	483	587	788	89	681	86	1120	1359	207	604	274
79	237	1324	834	213	1048	379	530	1569	625	266	406	408	567	1197	472	320	603	996	844	1219	710	532	887	504	1016	1474	723	1073	1545	911	1823	1080	3349	496	293	547	1619	1886	717	666	1039	653	1144	915	620	876	1096	2077	659
80	50	129	70	100	190	49	84	301	50	-19	10	18	26	4	86	150	63	132	96	479	334	17	-34	-33	116	-143	140	2	400	34	210	66	4205	218	-117	71	243	855	354	130	498	77	311	72	194	104	113	-2	127
81	93	134	104	-362	190	40	99	174	192	73	141	194	162	1065	117	90	259	190	283	278	79	622	3	-29	527	219	546	194	268	-144	194	380	227	130	250	-13	338	301	162	155	91	100	347	140	329	457	89	243	54
82	673	372	208	166	705	274	381	979	1057	166	636	379	519	1316	882	189	932	571	725	391	639	648	285	330	874	1675	58	-398	350	550	399	1462	791	372	15	-115	-772	1391	261	489	-154	707	995	661	541	679	350	1136	219
83	188	31	-86	-155	222	31	-115	36	82	55	75	73	55	394	477	33	50	23	59	232	1338	15	125	19	55	909	-16	258	131	87	541	-45	-53	83	31	-20	0	1970	-13	141	-43	57	-130	132	63	7	191	251	48
84	15	-80	-48	-239	-1092	68	119	3	-40	64	-39	-11	2	99	120	16	99	103	211	229	257	16	126	-59	86	146	173	2	208	7	136	-17	-327	-63	3	-20	-211	192	-29	-57	62	128	-33	71	256	92	59	145	48
85	324	288	106	93	756	97	257	-23	225	18	71	98	396	584	256	130	194	219	380	927	683	612	149	172	149	956	1074	626	833	140	740	92	73	210	66	150	2064	687	539	239	299	179	451	113	706	858	44	677	-54
86	1271	760	394	403	711	503	537	593	1110	235	525	767	348	1653	726	707	691	886	1481	1061	888	934	1082	375	1561	753	1132	1280	2493	497	1628	1539	949	931	587	429	1206	762	955	484	643	516	634	751	1343	2536	467	1156	948
87	126	-108	-168	-291	-44	-117	-186	-281	-64	24	-41	32	-138	-22	6	78	-81	213	-92	162	-41	52	-160	-290	100	-203	209	5	-142	26	252	-197	-163	155	-78	-219	-254	-285	53	-247	-125	156	-329	-96	33	-82	-94	-481	-175
88	887	326	887	571	1283	250	372	1133	477	257	769	351	1009	415	235	350	331	467	444	1635	1311	219	1056	615	275	1713	478	1346	2455	1150	2485	418	234	666	438	413	1842	1098	776	966	1538	569	1709	1059	1127	593	804	1475	707
89	1238	548	612	205	1143	516	466	667	370	137	247	695	532	1591	361	232	469	592	1011	1184	1080	2105	541	411	482	1265	1810	896	1183	292	1166	673	298	582	246	425	1206	897	1265	429	619	422	833	458	754	1390	208	1374	274
90	90	211	374	117	368	168	539	402	237	45	99	346	234	1713	339	172	275	216	289	468	592	962	83	156	200	928	576	472	789	37	788	232	173	380	133	138	508	821	507	204	87	374	607	110	404	870	229	579	44
91	319	345	204	147	546	166	139	506	669	152	134	468	508	973	324	170	380	583	287	557	769	845	244	545	338	1071	743	206	597	577	625	671	540	338	121	46	645	947	346	87	353	432	690	155	262	809	494	369	137
92	95	283	199	42	432	198	91	318	389	37	154	241	173	877	289	66	201	196	611	274	180	640	192	164	466	114	232	148	71	72	110	241	363	232	23	92	264	335	226	242	101	162	151	45	202	440	111	201	206
93	325	574	614	-59	305	149	521	1244	1377	221	388	1166	527	3458	891	363	821	1334	1155	937	319	2645	654	543	1404	1255	1601	666	1353	56	1371	993	747	733	176	381	1228	846	835	408	561	681	1063	555	812	1234	592	1052	347
94	308	682	512	730	324	89	197	677	826	102	210	556	333	1149	504	266	604	612	685	437	361	613	481	138	1055	1176	582	503	827	637	630	581	909	323	344	124	582	612	581	209	469	409	711	255	320	602	255	921	195
95	279	484	354	370	-1690	262	182	798	394	27	565	197	210	170	277	315	289	291	313	821	500	158	325	709	352	905	150	229	696	1123	551	335	455	97	673	429	1535	-293	266	-250	860	610	571	297	412	391	276	313	549
96	-24	-112	39	218	-292	-8	-110	-184	-110	-74	-44	-33	-2	-106	-35	-64	-133	-54	-75	-112	-85	-8	-69	29	-57	-79	-65	-35	38	-49	-105	-109	120	-22	-93	-34	95	192	176	-59	91	-2	65	-20	-52	-106	-89	-229	-79
97	-3	-33	-26	211	-101	82	-66	-87	-3	-72	-2	6	-125	-36	17	9	9	-20	6	102	85	-11	-38	-130	55	-38	65	20	-131	-30	-189	-17	66	49	-113	-27	31	-92	29	-78	169	-49	-20	44	35	10	-43	-120	-178
98	337	147	394	871	444	359	410	664	502	131	533	440	322	1537	527	495	891	667	966	800	595	975	509	302	687	1795	746	631	663	516	756	629	333	413	137	395	455	637	408	185	1097	524	216	353	522	1257	304	1019	639
99	105	38	55	381	171	53	44	10	79	32	93	110	26	396	153	70	138	158	213	56	-50	240	167	65	354	766	350	189	87	79	325	206	126	163	39	60	264	8	208	21	-91	209	81	-64	277	182	207	324	65
100	40	-90	37	295	38	-14	-106	-26	20	20	-10	2	101	68	13	0	18	-34	20	52	26	42	-5	79	0	187	-19	53	158	18	246	-29	119	82	-11	25	0	-276	42	-2	-372	194	24	50	211	-34	46	190	48
101	104	219	51	20	266	120	59	-114	116	-6	-51	112	61	350	47	50	-9	-25	218	260	-35	171	89	-274	321	-98	75	-30	252	53	204	129	-109	106	-3	23	-148	125	256	119	-29	201	-99	-55	329	196	134	165	-58
102	74	-373	-59	-132	-216	-117	119	16	-432	-117	-34	-40	-95	-781	-107	-13	-138	-106	-215	155	-97	-239	-17	41	-183	22	-144	-40	-345	-144	94	-226	-830	-37	-183	-177	-42	-293	45	-89	-604	-83	-266	-76	-28	-164	-73	-223	-240
103	187	77	113	248	-203	91	273	405	689	136	265	174	319	596	261	260	124	187	321	267	970	334	322	314	539	546	406	281	350	258	362	749	144	118	215	117	434	771	197	440	391	117	203	286	251	666	294	534	199
104	-10	-77	-66	-364	-196	-13	-39	167	14	-66	-149	49	-215	-33	28	90	-5	346	-151	66	269	111	51	-75	-114	-19	16	51	-257	-288	57	9	-327	11	-223	4	-127	-528	-34	-32	116	8	142	-243	-59	41	-134	16	27
105	-181	-395	-8	-542	3641	133	-4	40	-434	-255	-102	-227	-250	-218	-139	-86	-295	-106	-584	-796	-337	53	-343	191	-198	-1033	-435	-651	-794	-239	21	-524	-452	-251	653	0	1683	2858	261	-174	-295	-77	-921	-335	-339	-394	-128	-1156	-75
106	20	50	-62	-155	95	50	71	-20	84	-80	-86	46	66	178	73	26	63	8	203	-38	35	14	53	-39	21	31	173	97	-246	-18	-73	14	2	31	-11	13	127	-352	178	-27	-33	12	139	-44	43	150	58	-139	-61
107	2480	3201	2651	1800	813	997	1971	2338	2389	2148	2203	2115	825	3633	1981	1180	3211	1036	1513	2164	1728	4642	1925	314	1372	4964	2865	1883	1392	903	1991	2309	1674	1639	2356	862	1164	1995	1900	1295	894	1367	2575	2234	1640	3295	276	2228	941
108	205	372	508	558	311	194	428	1187	608	119	423	428	287	554	432	283	412	161	650	634	352	357	625	245	431	947	864	252	1129	653	1077	356	369	388	391	487	1947	1006	613	650	691	512	665	556	458	853	205	473	567
109	-515	-958	-652	-457	-406	-362	-508	-929	-871	-66	-779	-449	-783	-847	-340	-61	-495	-441	-1403	-743	-1278	-511	-926	-413	-1020	-1980	-1764	-1088	-1463	-755	-1387	-1229	-621	-210	336	-390	-2466	-301	-77	-878	-1068	-85	-638	-744	-578	-1278	-502	-2166	-381
110	751	281	370	314	-311	221	297	717	326	215	245	441	301	822	416	243	256	193	461	193	559	1000	124	96	124	216	442	475	208	-30	604	267	205	551	125	48	0	-8	864	5	198	59	539	314	458	731	-34	288	343
111	98	67	44	-28	-540	49	59	298	95	-91	-48	27	138	200	119	152	136	225	6	-28	17	113	93	11	124	-212	442	76	-60	-151	-47	207	131	220	156	-20	-539	-427	2	193	-275	36	146	-44	-20	52	91	344	123
112	-48	-217	-177	-142	-349	-168	-128	36	-131	-152	-139	-235	-61	-187	-100	-56	-128	-193	-280	-285	-133	5	-135	-118	0	-600	-307	-89	-158	-235	-320	-280	-119	-6	-121	-143	-328	-108	26	-315	-246	-51	-232	-62	-1	-176	8	-475	-123
113	50	117	88	37	38	82	19	308	154	12	68	102	95	249	133	66	208	150	253	193	153	116	87	130	147	225	242	56	334	26	168	205	166	101	125	152	264	888	144	136	246	74	203	135	136	218	164	327	216
114	206	-25	1291	771	2319	334	732	593	240	71	565	524	596	1077	406	432	462	-228	592	920	867	417	-1	336	900	2348	373	1663	405	322	1403	-29	316	291	-160	147	1852	1794	579	1728	266	158	413	607	209	695	946	1825	718
115	-52	-807	-896	-714	-7142	-287	-450	-2143	-597	-224	-278	91	-420	-1189	220	-443	-871	-430	-516	-1678	-82	110	-432	-478	212	-464	-703	107	-3009	-2885	-320	-270	-601	63	-156	-905	-1132	-4367	-755	-1515	-1983	-704	-1115	-501	-959	-1056	-817	-3169	-6
116	194	13	-197	-59	419	-60	-82	-130	-109	-33	-124	109	-149	-321	-29	-9	-125	-95	-40	-141	-236	-21	-277	-33	-17	66	-180	120	-339	-49	-572	-136	105	226	-70	11	-1408	-1131	-5	413	-77	-134	-221	64	18	59	125	-310	-274
117	41	278	82	314	-336	-27	22	103	156	-4	154	129	23	188	51	41	138	112	167	0	74	154	131	160	240	689	153	120	115	110	525	119	184	154	90	73	328	-368	56	-223	212	21	390	159	63	193	64	148	48
118	68	164	22	145	-101	-36	135	251	307	-61	-157	300	-7	308	284	112	195	25	177	-204	112	413	40	-150	-21	403	209	53	49	-26	693	240	22	115	-74	385	-243	117	189	62	87	-14	228	16	37	204	41	713	158
119	84	-15	6	-300	-38	-39	55	120	78	0	48	154	-71	394	274	69	53	135	316	186	195	248	6	43	728	187	297	155	-208	-56	-131	189	35	162	-3	60	222	343	18	76	-43	-10	117	110	164	394	2	201	17
120	-50	-387	-159	-259	114	30	-133	-550	-78	-17	-172	-58	-223	24	-203	-32	-196	92	-108	-190	68	-84	-93	-189	-340	-476	-373	53	-356	-318	-278	-55	-181	109	-35	-143	-359	134	-2	35	-469	-122	-573	-33	-1	-57	2	-422	-164
121	24	45	-19	24	69	108	13	-150	-24	125	-26	125	23	116	39	60	53	72	44	24	82	-22	-1	-23	504	222	193	58	87	-98	68	38	-86	166	0	55	-381	385	69	-38	154	-42	4	33	170	108	10	16	75
122	154	-41	-115	-127	349	17	-388	560	-296	-255	-151	251	71	34	99	-203	108	147	-18	-451	-630	-80	-288	116	-157	-1169	189	-212	-1134	364	-378	-223	146	-166	31	-136	-1355	-75	-282	-40	-319	-147	-462	-208	-13	-102	-298	-1346	-161
123	219	437	239	-112	-330	-18	184	-114	192	-179	2	591	-231	466	457	13	253	245	552	289	189	747	-64	-482	449	1258	45	232	0	-391	704	16	483	33	19	60	539	352	-336	171	396	342	67	409	365	489	55	772	412
124	175	851	-758	-13	940	18	-190	902	1034	213	675	514	548	1705	650	387	684	1637	368	1255	1216	840	791	597	1540	826	1182	638	1277	664	1303	1617	990	397	58	416	-2191	1643	293	484	619	469	282	311	385	796	217	1254	271
125	-64	-77	-11	-179	-133	11	-71	-254	-87	-83	-128	-7	23	-81	-6	-36	-108	-34	-115	-77	-115	-19	-2	-69	-33	-298	-124	-79	-21	-243	-110	-97	-85	-17	-144	-161	-370	-846	-234	-176	-125	2	-124	-154	52	-143	-40	-335	44
126	190	1600	-401	-179	-82	-155	-310	1405	153	217	192	244	-460	393	219	204	374	28	-469	-59	44	779	364	-609	703	-769	959	508	-394	-1234	-267	-423	283	166	277	-124	-1100	159	1056	-185	-488	-44	29	-480	586	5815	-495	123	-608
127	222	83	110	528	1461	-17	208	412	356	31	180	66	-205	-136	92	160	440	89	-124	246	121	182	276	-114	-200	451	-186	467	-71	-284	-31	225	163	165	160	268	-296	511	181	410	-4	192	313	253	-50	108	298	559	243
128	-27	-207	-64	-211	0	-24	-13	117	-91	-33	49	-26	69	-202	-59	-6	-68	72	-192	3	44	-109	5	94	-51	146	62	-104	-27	186	-173	-155	-315	18	-19	60	63	41	-13	54	-101	98	144	-27	14	-13	55	67	51
129	272	234	95	-16	120	175	124	265	200	114	158	142	207	230	108	167	182	144	245	193	266	361	243	213	224	724	330	355	76	208	278	181	119	179	70	85	412	394	90	253	174	229	40	121	138	341	58	310	30
130	241	-80	175	-18	11768	229	621	701	265	146	497	241	407	539	73	170	91	271	450	331	609	71	336	559	236	899	39	283	1151	903	914	335	386	336	274	291	5674	6908	592	4800	681	522	1009	416	361	300	94	1100	494
131	147	395	130	463	787	137	197	1234	402	128	315	67	338	422	181	41	282	193	320	356	387	182	585	181	323	1608	605	590	1101	497	1749	498	425	158	215	254	1217	1383	314	797	817	308	1049	645	374	666	328	1486	151
132	23	-311	749	680	476	33	450	1271	137	125	237	-47	85	30	200	75	269	129	-1	225	432	-191	115	531	5	680	104	792	1277	269	1471	120	140	190	62	-104	-169	-503	413	127	1093	177	1045	341	398	112	140	1657	536
133	51	-3	70	80	-114	110	48	30	147	53	69	181	29	1186	129	80	65	332	256	95	100	77	161	-7	74	149	85	163	180	49	378	105	80	73	-58	43	0	92	128	236	275	23	137	32	127	374	53	50	134
134	93	83	39	-205	292	75	110	-16	-38	52	11	105	47	149	33	36	-21	124	82	56	-14	111	60	35	88	174	121	107	54	288	162	-17	-15	105	23	120	359	-100	85	0	-4	179	241	138	11	37	28	181	68
135	22	-65	-37	-24	-82	76	-71	-110	-81	-119	-2	50	-23	142	2	4	15	25	-26	10	35	-160	-33	47	133	101	32	-5	-147	75	84	-40	39	-21	-11	46	-539	-58	45	-10	-232	-104	-101	-69	28	13	-17	-389	0
136	329	444	244	315	1626	200	461	540	389	265	299	175	231	542	449	324	219	462	378	345	669	60	441	213	559	762	500	643	685	922	966	740	422	375	540	330	1355	1643	493	829	459	482	589	308	842	544	361	2222	395
137	137	-11	51	138	-101	130	17	10	79	30	38	158	181	227	69	153	22	144	108	109	109	118	51	215	126	-632	216	191	213	262	94	156	133	53	0	242	455	134	224	78	77	152	189	126	131	224	49	139	-171
138	599	1190	1127	547	1963	595	468	801	1495	425	748	589	1044	1531	846	718	1137	990	1117	891	254	1323	1674	707	1231	3292	595	1155	126	558	1234	38	962	624	724	755	-3938	-5357	752	1855	328	848	1194	369	990	1043	125	-58	106
139	215	393	312	291	1048	118	68	174	397	59	105	281	82	337	176	106	270	190	150	162	236	749	567	296	378	492	337	646	372	455	215	282	80	279	266	298	-63	435	456	201	9	242	2	386	314	1042	80	683	82
140	72	318	155	16	1118	230	313	419	162	53	133	272	90	755	136	172	358	485	353	465	541	159	335	312	555	365	383	367	432	387	404	587	536	444	207	217	518	1542	322	100	667	117	672	64	258	574	192	503	51
141	-272	-192	-228	-394	-305	-121	46	-701	-223	24	-232	-71	-130	457	-122	-118	-82	-158	-215	-253	-298	9	-61	-205	175	-1017	-19	-286	-663	0	-572	141	170	-179	-58	-120	-645	595	10	-231	-372	190	-191	-208	-82	-244	-261	-55	-281
142	17	584	148	252	228	39	22	369	129	3	105	102	63	717	94	70	71	155	174	204	233	-63	221	35	57	244	-127	117	257	208	194	117	254	67	-43	189	222	427	170	144	164	109	462	140	277	254	44	403	68
143	15	92	82	147	0	115	4	80	68	18	27	173	10	257	73	56	215	439	50	215	82	133	115	-3	120	-123	494	232	197	201	-89	73	289	94	54	120	148	-142	122	209	-43	319	-18	104	159	152	16	288	182
144	157	360	168	149	444	66	-39	254	424	61	183	220	119	667	275	216	212	164	329	77	148	485	128	150	649	460	245	91	87	220	357	256	225	145	43	110	465	628	149	198	-498	280	255	15	217	582	74	288	216
145	21	-85	19	130	324	15	-19	114	167	31	-35	13	39	103	-18	12	-77	-138	-107	-243	-180	40	-47	-83	-61	187	91	56	-5	37	257	-154	327	50	70	196	222	-268	157	174	-58	119	51	22	-142	104	65	-83	6
146	67	130	62	194	209	60	106	459	500	159	123	285	178	1651	570	252	378	239	383	239	722	37	290	181	716	406	618	155	537	56	520	843	357	388	62	300	465	-142	477	179	507	96	-36	179	415	450	104	257	34
147	324	828	168	527	177	307	588	365	1075	186	127	255	183	2541	1212	646	603	441	1842	475	1340	1118	864	177	1658	460	1882	710	789	243	1203	1198	543	821	841	617	1270	1442	896	753	1247	542	625	270	901	1291	452	1080	512
148	963	1366	1435	1753	1124	417	1081	2391	844	371	989	671	634	1303	717	512	1091	543	732	1223	1379	1008	1145	660	955	3331	1421	1328	1403	318	2401	1426	1390	778	551	536	1662	1333	1518	497	2413	702	2352	1264	841	1128	1655	3068	1817
149	68	62	55	220	-95	-46	86	177	-35	25	24	27	45	79	-11	4	171	66	-51	-45	-17	96	-53	0	11	-130	229	2	-186	-231	26	8	-72	31	39	48	942	-125	53	108	198	-23	-158	6	116	58	-7	302	195
150	271	306	-22	-865	432	63	241	372	376	-2	633	299	93	464	-45	286	233	291	-170	-341	402	674	226	108	212	-1703	422	-132	-641	387	-1014	-311	49	-129	-426	492	-391	603	50	410	87	-72	530	243	575	102	185	898	-137
151	218	105	204	465	279	163	195	332	271	100	100	225	322	632	185	87	488	447	350	553	763	1463	200	83	161	737	1385	477	931	353	856	289	66	352	164	152	1312	67	544	236	251	152	731	284	507	881	74	890	99
152	99	181	150	325	6	20	51	-278	34	-34	129	100	103	-134	2	-1	86	231	160	-179	74	18	256	9	122	537	340	-33	10	-121	294	196	164	87	-105	4	-74	-83	114	97	149	-92	-36	-13	13	84	44	405	-89
153	174	417	212	403	571	126	-64	325	329	-3	106	209	-23	137	16	-56	-28	135	366	-137	-11	220	285	144	267	263	432	237	32	-148	478	112	0	-34	50	323	158	612	-130	204	183	-55	45	-50	239	569	-83	-16	-44
154	228	1577	199	988	279	471	253	127	162	25	57	102	639	2035	164	149	173	1426	1130	373	325	565	523	231	986	1665	219	-104	-257	155	2007	254	327	266	387	487	95	335	357	555	-72	-203	142	-118	968	1870	276	926	-175
155	820	231	1510	211	584	516	645	352	410	132	702	1540	130	1635	582	1084	561	519	1441	162	402	912	555	249	628	521	1231	457	460	45	688	788	457	709	-39	563	359	494	669	244	715	218	600	470	541	1470	228	792	219
156	-73	-224	-277	-22	-298	-159	-273	-647	-192	-159	-114	-32	-370	82	-9	13	-125	-586	299	-497	20	-303	-99	-397	-326	-22	-409	-140	-613	-660	-835	-223	-56	-73	-317	-48	-328	-846	16	-397	-246	-55	-571	-154	-31	120	-86	-299	-323
157	435	476	77	738	1944	352	537	852	358	182	564	889	162	1800	143	463	362	915	413	666	304	427	670	373	661	435	1178	467	1490	561	451	440	464	396	46	575	1958	1685	456	326	1025	372	1352	719	636	1168	483	1279	-85
158	44	-534	-77	-1	-254	149	-42	-476	-337	-274	-45	8	-189	-355	-68	-43	1	-184	-49	-426	-74	-12	-55	-19	-248	-677	-137	125	-213	216	-131	-562	-171	101	-219	-23	-688	-385	232	-261	-130	77	-15	-71	-251	-112	-79	-545	-24
159	923	85	505	368	864	256	632	556	1991	138	870	1329	199	2533	1186	441	779	415	935	662	704	989	629	334	821	1719	1214	531	608	387	1056	1641	959	690	160	355	857	1131	669	386	483	212	936	822	578	1970	499	797	512
160	-61	-122	-268	-708	-305	-71	-248	-358	-479	17	-72	-51	-85	-284	-183	-113	-236	-109	-218	-236	23	-69	-129	-136	-222	-975	-121	-375	-893	-224	-168	-456	-146	-93	-74	23	-359	-1081	-290	-266	-217	-342	-133	-292	-48	-155	-264	-562	6
161	5374	987	2504	592	10294	374	1187	446	2546	435	1716	3483	117	1570	82	106	933	713	665	267	204	4997	1057	735	230	1064	975	2057	-438	907	236	1741	-227	925	1096	723	539	3319	194	2960	-116	1296	207	1933	26	4087	2031	3020	247
162	25	-234	-235	-147	101	-130	142	-422	212	51	-3	434	119	37	215	126	61	378	621	66	-14	222	-38	-144	311	-177	81	25	-235	-698	-888	-23	-5	105	-7	73	-296	-16	21	-59	-164	-62	-38	135	-170	376	-82	-688	-96
163	795	662	1149	100	889	804	663	741	2238	76	1010	1679	261	2300	526	301	1684	1398	1758	197	94	6287	1185	448	1794	-111	700	495	306	353	273	1287	794	358	-19	358	486	217	330	416	135	572	708	502	237	2874	210	579	285
164	316	393	654	1626	-69	134	217	560	122	336	373	3784	540	980	323	101	1111	961	87	267	396	485	843	239	1309	766	556	1096	285	391	1166	557	374	963	129	940	825	679	336	484	754	252	623	446	503	1094	438	862	329
165	3	261	765	57	590	-76	-39	93	29	93	-61	260	-29	128	-73	-66	111	60	5	-35	-71	614	-60	-31	141	-181	144	140	-334	-45	-42	195	530	117	-50	94	465	326	-45	168	111	81	-252	18	-99	323	4	-25	37
166	25	137	-31	-72	216	224	-64	-30	121	-18	18	403	45	98	164	90	217	43	191	-7	109	446	3	152	342	168	235	53	-131	-117	-57	70	229	231	-62	87	307	-142	184	144	0	77	18	69	123	515	159	-81	20
167	75	626	193	166	1042	143	-11	124	184	-50	158	328	327	457	152	123	212	349	213	313	216	336	261	223	482	521	350	214	372	375	436	407	677	210	-39	180	423	855	8	231	261	10	216	125	146	440	237	436	240
168	235	494	77	-128	216	237	315	385	559	51	198	738	101	781	404	264	798	23	116	21	159	1223	421	5	527	435	176	240	-109	3	-115	687	474	223	156	263	-74	184	130	73	-38	467	94	135	279	1225	158	53	96
169	1450	704	1879	786	692	665	974	1221	1104	546	1153	1630	-111	3326	1081	555	1861	225	460	1071	698	3031	998	15	1758	1357	723	567	685	315	341	1871	448	556	320	478	222	50	1008	585	517	1107	903	430	709	1987	219	991	336
170	304	308	543	31	228	204	270	365	411	192	278	982	277	1589	573	170	925	337	603	211	298	1371	446	168	1053	638	579	194	246	292	462	620	337	222	113	348	359	-226	485	220	382	477	577	284	676	1348	162	358	20
171	611	2740	681	278	838	423	266	623	1814	408	774	1334	55	2047	1413	293	946	349	1074	546	420	3124	807	-316	2556	994	798	436	235	208	388	1056	333	364	489	434	645	360	309	519	338	259	374	413	706	2391	216	540	99
172	126	142	-13	-173	-82	-72	162	201	101	-32	64	54	55	233	58	47	-28	-69	159	380	124	125	94	-156	340	193	-9	206	263	-117	120	-450	-231	98	101	-20	-402	251	-8	19	130	-87	234	44	114	71	32	-53	336
173	87	-8	-15	112	438	147	79	150	-127	-18	13	126	77	-290	-26	44	-18	-153	-191	377	331	-91	120	170	98	-559	-52	293	137	189	36	-580	-229	59	-35	134	-31	16	69	168	343	291	221	79	-88	-205	62	338	443
174	167	271	215	-28	6	42	293	137	145	-39	397	698	159	788	196	372	228	323	272	370	263	489	220	39	894	479	481	337	60	56	126	312	149	170	211	113	10	897	74	46	227	111	176	125	207	543	191	319	302
175	371	4420	1382	764	2865	1239	1016	1529	5336	907	1224	4147	1923	10857	3918	1284	4169	4410	5245	3631	1367	6104	3616	733	16725	2358	7387	3023	3513	1101	3541	5873	3113	830	978	2087	9347	2724	2407	3524	1963	1253	2131	465	2688	7163	461	3258	587
176	311	692	248	84	711	178	566	798	720	135	464	648	279	2504	820	272	1011	921	417	1547	1157	1424	828	278	1733	1455	1096	679	1079	326	1192	1152	285	403	223	298	698	662	611	536	527	477	1081	262	1062	1101	567	999	340
177	65	132	59	-229	196	205	233	-16	166	53	1	347	570	1036	149	136	103	800	310	631	50	182	-28	181	866	228	736	43	389	220	304	499	105	-1	160	101	1016	1047	138	160	357	175	288	45	196	465	17	187	147
178	1082	67	-53	-469	292	314	-15	-473	31	82	-58	242	895	184	-65	135	111	571	-184	303	-41	334	-122	551	490	-333	383	-51	230	163	556	205	26	362	227	34	190	41	312	-214	-154	-252	-65	-335	166	644	-98	-652	-151
179	-20	170	-39	186	273	31	-53	26	-57	96	3	23	-79	-264	-40	53	3	828	12	63	-26	-58	-75	213	120	-152	-45	-66	-241	482	-52	2709	48	-59	31	-71	-201	-528	96	97	-183	-42	99	-113	39	-6	43	366	484
180	71	512	73	185	641	50	193	305	203	55	298	73	351	405	162	115	288	147	351	525	319	89	336	458	275	413	189	275	-142	353	761	421	275	118	-15	106	359	75	74	176	251	280	180	66	310	422	326	464	237
181	281	652	217	764	794	376	284	674	241	-11	160	285	476	-263	277	103	69	303	168	814	494	252	236	405	293	788	415	293	1167	1306	1156	10	471	431	583	106	1386	863	328	900	449	244	812	477	560	123	335	1721	683
182	334	189	734	-14	368	105	608	-147	670	116	102	652	359	1710	540	198	1350	141	132	130	364	3090	230	-134	636	66	815	615	-306	-205	-68	362	29	443	86	134	434	-251	491	277	246	589	-58	176	164	1064	150	-187	-130
183	42	18	26	170	355	-2	53	-261	-65	46	-8	-62	-2	-275	-100	3	0	-51	-96	123	-11	-5	-15	39	13	69	124	127	126	94	189	-99	-149	-7	54	108	677	687	-42	29	43	-132	128	98	31	-45	76	128	261
184	32	196	-13	22	171	-10	17	-46	142	20	61	40	13	32	16	-18	47	193	83	116	121	142	24	1	72	-127	216	212	279	-15	204	70	-42	75	39	-76	232	33	88	100	58	-10	282	113	134	724	17	148	-3
185	281	1059	-119	192	1957	47	-106	-516	985	40	508	186	-133	-36	770	-52	-79	-219	396	-370	494	1400	1130	1137	11	-613	343	1241	-570	205	-609	90	105	1555	1021	-173	-666	360	-306	435	-232	-130	-76	2246	-183	2948	191	778	587
186	-3	45	-26	319	57	28	-48	-90	-8	-17	40	87	87	-95	-44	23	-26	77	41	-176	35	138	81	-49	-15	216	-9	43	-131	-125	-152	-35	-195	15	31	-117	-243	-33	29	-97	-87	100	103	67	-67	37	-40	75	-6
187	-26	-23	28	151	228	13	-4	60	67	-61	6	0	106	-30	-32	18	12	-8	-56	38	82	-22	-35	35	5	-123	117	33	-82	-193	78	28	52	-3	82	-71	296	326	-37	70	149	-36	246	142	-24	-53	-92	58	-51
188	57	-5	128	222	495	131	239	727	418	12	145	364	290	1246	192	270	226	337	1517	310	639	105	867	361	545	212	1352	457	816	113	430	482	110	1352	-15	797	1005	754	192	653	256	233	-234	408	1676	2311	264	879	405
189	318	-1092	-643	-742	-6977	163	697	-2053	-367	-427	-810	157	-929	-498	-297	-36	-771	-811	-855	349	-177	-257	-577	290	-364	-2015	-674	-355	-1200	-402	-2343	-626	-952	27	-129	101	-4276	-9213	261	-2332	-87	-74	-1065	-392	-451	-407	-461	-1220	-305
190	-183	-276	-119	-179	-184	23	-66	-613	-281	-88	-207	-48	-93	-104	-75	-52	-160	280	-372	-208	106	-157	-61	81	3	-238	-258	-53	-224	-372	-225	-159	-150	-227	50	-152	148	-561	-162	-111	62	-42	-234	-176	-43	95	55	-503	24
191	1266	3558	2362	2484	3024	1097	3070	3710	2497	710	2127	2827	1569	4706	1739	1256	2174	1854	1836	5129	2098	3392	2630	1714	1729	5978	2953	3087	5075	2445	4161	2351	1518	1434	2458	2160	4478	5432	2866	949	4130	2146	4174	2244	2244	2646	2052	5103	1707
192	63	-11	11	35	108	68	75	-127	97	-40	-5	35	71	-46	45	10	0	11	24	-7	-38	20	32	-5	23	50	29	125	65	106	63	57	97	39	-27	34	-158	184	-74	78	87	57	108	28	9	165	34	78	48
193	-16	78	6	-65	-209	-43	-126	-87	-14	24	-54	27	-18	-180	28	-47	-9	-46	18	-14	-20	-33	32	-41	7	-127	9	-15	82	-364	-273	-29	-53	-47	-46	-131	-328	234	-90	-59	-96	17	130	6	-18	-11	50	-2	-41
194	-192	-186	-212	-99	406	-71	115	-147	-470	-150	-57	-158	-85	-358	-36	-72	-387	-427	-167	88	5	-111	-745	-166	-74	-1099	-137	99	93	110	-1082	-150	-407	-251	121	-46	1175	1140	-552	62	-87	-190	-257	15	-196	-113	-29	137	-288
195	501	1221	1144	426	946	882	586	687	2584	285	1046	2159	143	2846	1237	430	894	1325	1666	779	1625	1420	1390	282	917	1214	772	950	580	216	530	2503	1004	586	266	353	1005	1265	813	530	841	503	767	272	852	2494	313	509	329
196	409	1786	2205	949	895	1123	1824	1704	1978	520	1779	2691	1321	4846	2380	2456	1522	1917	2955	1367	1024	3112	2099	1059	2089	2170	2495	1239	1770	1146	1434	2561	2336	1283	587	1527	1228	1039	1673	1929	1218	1857	1499	1102	1779	3907	1367	1349	1470
197	138	142	354	181	629	184	221	992	214	144	125	461	317	1753	497	150	297	179	442	306	361	742	394	249	393	638	242	434	443	550	625	562	367	307	27	110	804	352	312	155	285	137	221	194	305	600	298	534	323
198	-6	209	77	-76	69	5	113	345	429	100	89	208	-26	533	199	70	216	153	194	511	198	65	220	41	409	559	166	206	180	140	462	241	320	165	219	-71	232	360	285	43	382	87	234	196	207	240	120	251	140
199	-1	-88	-86	-267	133	-69	-11	171	-123	-12	-49	-18	-18	-308	-40	-35	-51	-86	-70	49	85	-246	43	-53	-64	57	81	33	-71	-125	-231	-176	-140	-29	-39	-20	-148	150	61	68	-101	83	-158	-98	18	188	-86	137	-44
200	400	906	681	-87	165	713	526	265	1570	458	738	1898	234	1918	1374	1090	783	1322	1393	306	559	2143	563	116	2099	988	920	181	54	136	94	1028	513	548	219	640	307	310	392	702	401	389	207	208	522	1995	122	251	254
201	-4	412	73	-28	190	95	0	369	147	-5	-17	130	-13	387	71	66	153	285	99	282	213	188	89	11	324	190	147	51	158	11	331	103	93	67	27	-30	74	108	181	-76	135	29	-153	103	3	318	74	81	-72
202	527	1002	406	-125	876	472	339	597	789	65	249	519	327	2557	544	236	936	577	828	444	423	2395	659	247	2257	880	864	702	202	212	425	548	212	342	172	323	1069	829	624	998	280	304	284	196	442	1926	216	610	103
203	48	321	86	22	292	181	148	16	101	80	34	147	79	242	97	76	42	219	234	52	121	325	134	130	177	38	147	107	27	224	183	87	143	53	144	180	370	217	104	111	-38	250	212	55	39	216	129	769	189
204	96	279	146	175	184	131	28	87	202	-6	50	416	335	616	227	113	291	222	396	102	227	337	168	160	492	400	124	137	-32	68	199	237	153	53	-27	147	21	385	109	157	19	-32	65	89	95	395	56	391	65
205	114	-11	230	-186	-203	20	148	191	81	37	54	173	205	579	134	64	262	164	159	81	103	383	-5	-13	291	301	428	43	21	11	57	163	336	27	-70	134	656	-100	144	141	343	-36	4	-27	89	170	16	95	-51
206	244	98	692	413	285	401	361	1432	430	100	186	418	404	2255	756	320	238	629	466	557	390	709	643	350	1355	584	733	431	805	318	630	322	122	415	46	242	889	159	592	372	904	227	582	343	569	662	437	207	463
207	-46	-430	-42	18	-298	-72	-75	-77	-211	11	-114	-81	-55	-289	-113	-9	-74	-268	-227	10	-109	-84	-12	15	-315	-454	-137	30	-252	-201	-246	-283	-166	-54	-78	-62	-624	-1165	85	-103	188	-23	-397	113	33	-134	17	142	10
208	1733	3206	4505	3142	7231	719	6646	6967	6728	1647	5875	6019	2528	15590	2236	2220	6821	7830	5794	13548	2619	9814	7218	2907	22469	1856	17874	4781	17665	4245	20945	5981	3768	3913	1514	5077	23502	5918	9153	6057	4077	3368	10389	4196	8082	8841	3350	11097	2481
209	249	496	146	203	819	43	517	781	347	-16	335	591	5	1063	574	290	426	779	598	662	1041	915	555	136	937	-203	658	1006	789	189	693	420	1061	323	230	171	2138	511	576	427	798	383	383	744	513	1098	459	725	44
210	78	900	1191	908	864	607	845	523	1500	620	709	3167	380	4142	2518	2073	2030	2406	2571	987	1403	3348	779	176	2928	1325	2334	994	1063	174	1381	1990	1307	1220	215	1134	1175	1693	1334	1083	1736	962	1070	545	768	2829	438	1405	659
211	-168	170	-148	-175	-209	-17	195	228	84	128	-93	302	-66	296	138	-27	135	294	518	105	8	292	253	130	447	-260	730	-17	487	75	47	254	32	167	176	-101	-158	8	85	21	517	227	13	76	26	549	-11	-282	20
212	16	-630	-108	-252	-692	263	-330	-161	-65	-156	-7	14	-490	-251	102	12	-113	118	-569	-419	207	265	-221	-442	141	-2209	-235	-265	-290	-839	-2028	-181	-444	90	-489	-244	-1492	41	-443	-391	43	-115	-162	-30	-427	-536	-429	-1587	-268
213	-3	-11	26	-157	-50	-56	15	-275	28	25	6	-19	-90	24	-3	-7	17	31	84	81	-2	7	71	-53	74	0	101	102	-158	-110	63	20	1	9	46	-53	-21	-335	-130	108	-120	122	76	67	-7	89	-119	-50	20
214	-73	-326	-19	39	-177	-85	-22	100	76	115	141	169	15	-275	13	16	-45	-83	-54	24	148	-86	-80	-11	-173	-123	42	127	-137	-273	-168	-81	-221	-46	125	78	-296	-100	-104	-111	14	72	-316	-15	35	105	-17	-103	51
215	3130	1558	11893	1863	2452	3687	2195	3103	3636	5600	4545	4064	4670	3863	2799	2892	3544	2385	6783	1868	3016	4742	6682	4313	3525	7790	7102	2353	2225	2065	1313	2917	3878	4369	1722	6300	1979	2003	1326	2895	1102	3111	923	3408	1794	8189	3496	2905	2742
216	-153	-707	-738	-912	-984	-158	-497	-1660	-598	-183	-578	-416	-618	-860	-346	-106	-511	-1100	-1309	-387	-725	-387	-809	-229	-705	-1722	-1424	-856	-1573	-626	-1618	-923	-501	-384	-242	-124	-741	-1240	-392	-359	-1692	-222	-404	-939	-659	-792	-297	-853	-257
217	-90	234	443	125	5331	88	328	660	163	43	240	118	255	239	128	164	184	69	393	528	491	157	227	179	171	626	268	462	833	664	656	195	349	181	536	390	783	2892	354	5113	459	205	302	174	249	163	323	1402	333
218	335	1488	1763	222	3469	1277	1180	1690	769	401	1415	1764	1721	3183	1062	1260	876	1273	1116	4022	3046	1521	1834	1576	1327	4500	2249	2259	2400	1556	4492	1375	1075	1815	1025	1104	2720	3169	2732	1679	2713	1814	2007	2270	2150	1545	2171	2995	646
219	-137	-194	59	-314	292	173	392	305	-250	5	60	44	-29	714	112	156	-45	219	-84	775	207	220	-61	69	196	-527	245	442	1452	-56	210	0	-21	-34	-62	-69	529	-184	1377	206	474	310	625	-77	427	43	155	25	-17
220	373	244	792	388	432	1041	788	929	2059	482	1222	2022	666	2321	665	1864	622	1447	2077	958	1003	238	2092	686	896	1125	1332	733	718	983	830	1544	1626	1601	-54	813	857	1165	1345	936	1146	454	365	490	1123	2478	698	1245	1216
221	217	427	104	59	1118	229	-8	311	598	27	112	300	-29	736	209	193	113	167	526	183	612	576	494	47	128	540	258	265	191	129	73	360	302	133	199	64	391	394	298	293	120	182	24	79	350	1524	111	282	199
222	-38	-232	8	-147	-127	-43	-4	-63	-32	-167	-3	0	-95	-111	-91	-27	-44	-23	-111	-45	-35	-26	-39	67	-39	-79	-55	-63	-115	-243	115	41	12	-41	-62	97	190	-201	144	48	-193	81	-261	-22	-86	-52	44	-184	-85
223	22	284	-11	-117	50	81	2	127	149	9	9	97	-5	148	111	-29	58	34	179	10	-20	125	129	-45	114	85	117	0	131	-75	31	138	134	14	90	20	74	-134	48	27	-174	68	90	45	80	109	-14	355	103
224	-38	-70	4	-336	50	26	-130	-73	-8	20	-17	-19	-21	-97	-60	-40	-34	-69	-39	-211	-17	-51	2	-67	7	-63	6	-17	-213	37	-15	-39	-11	-7	-46	-23	-10	-335	136	-65	-14	-152	-252	-79	22	-19	2	11	-202
225	219	11	79	431	228	46	-13	-20	0	-93	22	54	151	44	123	0	50	-77	134	-169	103	51	153	-53	96	19	45	-135	-21	75	-73	39	109	107	-27	-53	42	-125	112	-5	96	59	-94	-71	-7	100	-34	201	-27
226	2985	19623	5688	6560	2795	4558	4450	3854	17664	7560	9761	13744	2746	12984	16420	8335	14686	13457	20961	2446	3922	15171	10412	3185	18076	10870	4351	3058	4203	4545	5359	16505	16820	4257	6901	6120	3779	3420	4093	8542	2984	5952	4783	5524	5406	15034	4377	4386	6615
227	-168	-92	-51	-370	-133	84	-84	-171	-90	-160	-127	-36	-205	67	-86	-27	-176	-283	-58	-123	26	136	-94	-85	-159	-486	-111	-176	-131	-98	-267	-264	-76	-15	121	11	-412	603	50	68	-357	-51	-196	-91	-29	-211	-229	-347	-72
228	277	511	408	87	349	207	424	281	1202	-11	355	1991	375	2682	717	190	293	83	1403	465	59	2269	369	187	647	133	943	189	186	246	756	897	344	170	133	399	571	-217	509	195	38	128	866	128	237	1591	82	92	274
229	938	1309	705	381	1404	456	428	714	1509	194	633	1375	386	4728	992	520	1300	860	984	1269	979	2488	820	660	2670	1808	1509	720	822	368	1539	1699	965	1207	289	561	1598	1668	1192	1023	1020	454	891	1031	959	2897	743	1223	158
230	302	55	8	-91	88	-37	64	70	113	-11	13	191	23	324	294	26	110	57	249	77	106	108	65	-21	346	467	189	58	219	-110	225	114	61	97	39	69	296	-176	237	-2	33	87	-115	104	224	401	95	450	-37
231	74	-55	73	-100	50	187	-37	-144	46	17	-27	45	-13	18	43	81	-6	-57	79	-77	-88	100	-2	-7	47	69	111	-7	-224	-208	110	-34	59	103	-11	69	-42	-167	2	-46	-9	-49	-126	11	13	120	-110	-165	6
232	187	226	141	18	101	172	241	100	303	-1	114	242	7	1099	268	107	675	291	532	-45	-35	837	256	-21	1217	216	363	163	164	307	178	263	178	147	27	120	455	41	272	190	474	190	139	62	305	832	147	81	223
233	430	730	638	596	743	113	426	325	723	324	368	1321	205	1364	956	415	840	984	674	222	734	1208	418	239	1179	937	982	490	482	75	1040	856	190	306	113	575	1069	1131	576	672	783	216	765	577	427	1720	410	711	233
234	376	549	315	216	832	234	306	265	764	104	250	721	303	1542	415	143	616	135	552	186	195	1047	476	148	1150	540	556	104	257	-64	120	572	302	231	35	140	402	486	549	424	512	201	383	101	359	1068	99	445	189
235	53	127	11	-134	387	47	68	87	188	46	46	69	90	401	110	23	65	101	70	148	121	229	133	-53	133	260	271	125	71	-41	173	79	-56	83	-35	48	63	687	141	152	116	-34	85	28	31	456	16	19	140
236	3	-251	-13	-314	12	13	82	-422	59	-23	186	101	29	-42	0	86	-5	109	50	-447	-343	262	396	-377	214	-1026	29	-135	-389	-512	-194	-52	-292	14	-172	-244	-2149	-1131	-186	-359	-957	-220	-352	-226	-170	51	-226	-330	-508
237	210	623	239	9	50	66	144	164	-5	-59	472	155	119	-72	414	178	100	25	670	585	1050	198	371	336	179	893	1041	347	959	167	457	409	627	706	113	92	508	544	643	253	638	107	334	619	215	615	713	915	611
238	445	719	146	-308	1213	639	395	533	485	138	248	235	540	1383	569	326	135	667	678	1040	861	738	472	729	435	1087	831	776	915	387	1634	451	679	649	434	894	1471	343	904	707	58	233	1469	181	974	655	655	1934	216
239	846	1580	1020	1538	1035	545	559	590	1200	548	619	1445	687	1360	869	633	887	1354	1265	1265	1118	1834	896	634	1051	2011	1047	845	1441	717	1634	976	902	899	414	1333	465	2406	728	438	851	574	675	760	794	1937	597	1285	481
240	157	648	90	22	82	131	104	322	349	-25	175	421	117	954	138	86	145	254	387	313	518	1145	189	162	397	476	514	104	696	356	467	261	154	251	176	166	550	536	125	312	415	332	279	186	194	1245	143	618	192
241	5586	4252	7225	2235	2967	6479	3580	6279	3940	2214	4475	6233	10363	12658	3078	2640	6647	3772	5901	7946	8258	12937	7560	4158	5315	16525	8127	7134	5272	3895	5217	4642	3200	5214	1029	6543	4224	7947	6882	3665	5334	5125	3948	2993	5958	10203	3805	7822	1793
242	356	295	752	186	603	243	304	426	247	128	120	419	213	1069	114	126	170	335	526	303	340	1020	496	92	228	270	428	480	367	-159	147	258	163	154	46	413	518	486	402	476	328	152	498	259	344	388	159	1100	374
243	3059	6126	3840	928	2249	2875	3647	4753	4614	944	5734	4439	1896	7343	4394	1867	2522	2928	4379	5098	4345	8012	3844	2315	4502	2469	3847	4676	5311	2449	4109	4628	2466	5144	2098	1987	5790	7830	4315	5981	6892	2461	4251	3788	4012	8005	3138	5176	1893
244	26	6	-2	-244	247	-7	-13	-16	24	-10	-24	-19	117	314	9	32	24	37	43	208	-23	10	94	88	64	177	13	-58	295	37	183	51	-22	23	97	9	868	452	72	68	-19	-14	146	59	80	74	-32	117	-30
245	39	-18	-46	1	0	28	-62	-120	67	38	0	28	-119	9	-19	24	-10	-17	-11	0	-38	58	-1	27	-53	155	-26	33	246	121	36	-5	36	42	23	9	-1048	-318	-42	68	62	77	-33	38	52	20	101	8	-44
246	-121	-129	46	-138	-578	94	370	-379	-20	-156	191	-93	138	-458	104	170	-65	363	-35	303	-23	-99	363	-247	-70	270	36	490	553	-288	-331	-252	-401	57	195	99	-815	150	-40	-119	-149	167	-115	16	-1	-145	97	338	735
247	-31	715	-86	-257	-127	382	288	16	88	-72	27	-105	-90	1405	183	427	-34	363	402	708	1024	-73	380	-17	653	-9	844	263	509	296	378	376	2	407	309	-25	381	1165	816	312	106	98	586	446	200	278	431	-33	206
248	24	120	86	-175	273	14	130	362	256	9	-8	149	-77	63	96	36	63	245	56	289	142	112	195	-92	102	305	121	114	718	-34	63	45	12	37	121	39	127	-117	53	73	159	192	370	235	84	2296	20	257	44
249	-23	145	348	-41	279	363	250	519	500	144	268	589	338	606	250	293	244	332	525	405	352	417	249	350	265	953	455	273	827	303	246	354	150	456	-50	166	381	41	520	87	193	38	300	162	260	760	237	240	151
250	105	874	226	-3	730	285	392	536	678	104	321	250	165	730	614	216	263	597	558	631	597	268	517	266	1002	743	386	240	646	231	641	668	574	143	277	129	497	1366	325	410	280	182	250	235	382	549	223	582	109
251	-176	224	-108	-515	-1061	15	-150	13	46	37	-30	357	-42	181	260	70	200	-242	107	-98	74	123	-239	59	210	994	360	-48	38	-356	-257	-117	83	27	152	-94	-21	75	-8	-465	362	-158	0	-108	54	371	-144	-170	-168
252	522	643	301	687	374	165	126	379	785	87	267	1078	298	621	408	121	402	1054	506	246	399	617	855	96	1085	731	677	751	449	425	719	1050	696	380	121	189	137	922	96	677	135	242	413	96	294	1302	158	792	202
253	903	1035	501	3	95	171	281	322	771	123	76	1177	15	2193	707	153	964	23	530	306	50	1911	197	5	923	127	573	109	54	64	-57	568	323	523	-39	242	-370	-33	456	201	280	269	356	259	340	1395	76	223	75
254	53	36	110	158	5611	213	264	157	81	-22	124	239	34	159	398	-6	100	433	215	557	1237	102	19	81	96	1608	144	434	389	269	541	152	146	563	-50	69	762	234	184	59	188	248	478	42	20	104	198	1125	30
255	740	229	683	448	794	510	288	878	435	206	461	457	695	228	335	198	242	407	413	1117	396	454	921	427	449	1907	399	725	948	630	709	344	315	519	528	547	762	1752	408	495	1107	190	462	685	473	1064	279	1528	539
256	-144	-605	-77	-366	50	217	75	140	-351	15	-104	-164	-159	276	91	-24	-301	-132	-301	363	707	11	-111	-51	-334	158	252	357	635	-201	-446	-546	-325	312	-54	60	-910	-662	565	163	860	-111	250	281	421	-259	7	25	-426
257	413	238	199	-54	-158	210	115	-335	421	85	89	298	-2	539	441	303	408	216	671	200	26	1169	263	711	971	-57	412	273	49	-49	178	629	136	539	-78	161	95	-41	405	198	-111	499	-198	313	44	734	505	279	353
258	11	6	139	29	-76	40	68	-10	0	-2	-2	9	29	-281	-27	13	-5	-57	21	95	-62	-5	75	217	19	6	-36	58	87	-83	10	-66	-18	31	-129	-25	21	-435	-120	165	125	137	-33	82	-16	-5	-67	324	161
259	806	749	1024	280	1232	872	677	895	557	215	57	963	729	4837	997	580	1001	904	460	2196	1391	2361	550	978	3027	2155	1820	1425	2181	531	2417	937	-28	431	360	1012	2593	2272	1382	1349	2592	760	1151	983	998	1779	770	2220	432
260	51	46	-46	235	127	-14	-53	33	161	-22	81	5	90	-65	76	-7	-1	-63	69	-3	-82	28	195	181	275	101	85	5	-158	-49	215	-21	-22	62	35	-18	21	-92	101	-57	-101	77	-94	96	39	184	22	25	-10
261	2681	938	2267	1973	1302	1905	2033	3314	3196	1294	3041	1590	1752	4378	1804	1466	1414	872	1252	3670	2480	2427	2558	1694	1477	5044	2747	2969	3255	1826	3531	2290	2013	2266	649	1950	2149	2707	2503	691	2268	1694	2216	1752	1616	3076	2137	3020	1329
262	487	368	1093	914	374	227	821	972	947	157	1155	316	578	1345	952	373	960	285	787	786	745	1451	1459	227	403	737	1208	444	964	892	1092	1237	1067	636	465	124	349	310	701	351	382	1343	1011	1110	642	1037	680	1343	453
263	-280	-752	-647	-128	-260	-23	79	-1278	-765	25	-301	-185	-338	-351	-355	36	-246	-291	-881	-359	-595	-353	-192	-98	-470	-1792	-229	-546	-1863	-341	-1896	-485	-415	-351	-258	-71	-508	-368	-555	-136	-9	-488	-970	-568	-262	-624	-250	-932	-402
264	331	338	1082	1585	1582	163	1678	1512	316	542	462	560	687	334	209	281	156	392	213	1977	568	90	911	249	220	1576	1116	766	3387	292	1839	539	-505	318	164	917	2127	1190	1750	1183	1692	246	3411	700	852	298	846	2040	646
265	-59	-95	-122	130	-260	78	-35	-87	-172	-43	-116	-38	-74	-102	-60	-27	-60	-23	-107	24	-124	-177	80	-33	3	-244	150	-5	-219	-121	-357	-244	-254	27	7	-53	-105	-377	88	146	-9	-182	-146	-40	-9	-135	-74	-341	37
266	116	-380	-39	-50	63	-95	-17	0	112	71	-76	10	53	757	154	30	87	101	349	-52	340	-80	231	-130	45	1036	573	232	0	60	241	-28	12	183	-86	67	-381	-544	194	13	-58	100	-27	-110	236	343	20	526	72
267	-32	-53	90	-78	-82	26	-39	-194	25	15	44	52	29	-116	36	24	27	-69	86	236	-109	-131	5	-75	84	133	-42	56	5	-53	289	7	18	-50	-11	25	-179	-25	40	-288	256	4	97	-5	-31	-44	65	30	79
268	-608	-1017	-969	-1274	-1073	-566	-583	-1845	-633	-194	-1004	-537	-823	-420	-312	-292	-648	-644	-527	-1960	148	-343	-1336	-864	-732	-2177	-1096	-689	-2482	-1742	-2107	-1110	-499	-163	-661	-790	-1831	-796	-501	-775	-2041	-737	-1918	-848	-114	-983	-477	-1662	-920
269	22	-159	-2	-69	-228	-57	44	-107	-40	-2	-37	-51	66	-76	-39	-21	-20	17	-11	-7	-180	42	24	-51	-61	-60	22	-30	0	-186	-105	-64	-122	-23	46	-55	-105	-301	-80	43	9	-94	9	-30	58	-29	-111	83	-85
270	28	-191	70	-196	-82	84	59	-291	-180	30	-86	110	-234	137	-10	3	36	46	292	-232	-168	351	-199	-53	-86	-232	-114	130	-1397	-246	131	-164	-146	49	-35	-39	264	829	98	258	111	23	-614	-325	-59	201	-155	-411	-158
271	-100	-482	-261	-379	-222	-136	-239	-751	-584	-95	-558	-305	-39	-481	-349	-101	-167	-37	-523	-208	-384	-362	-487	-199	-66	-1134	-468	-406	-668	-744	-1145	-364	-278	-138	-320	-154	-264	0	-330	-5	-948	134	-392	-382	-119	-300	-214	-901	-316
272	255	8	6	170	-781	-49	137	328	-141	69	-1	111	-50	-73	18	21	-34	60	-89	165	11	-97	-6	-9	126	177	49	91	10	-18	-220	-152	-139	59	305	4	-296	-486	61	-370	-4	507	424	-11	39	-53	43	1825	116
273	247	819	776	244	12	-75	313	1667	717	61	337	176	466	427	306	13	287	181	378	1092	251	45	505	217	405	673	356	505	1408	-311	1581	103	322	6	121	166	-232	-385	144	84	386	36	94	687	331	313	553	2074	257
274	95	777	-22	-256	673	-108	255	197	610	12	197	243	165	364	262	166	107	655	755	599	423	418	307	350	439	959	432	132	317	512	1145	393	198	163	43	106	963	712	234	370	-111	203	316	160	207	543	140	425	-134
275	395	1149	1555	600	1080	852	1098	724	2741	93	1013	879	540	2607	1811	643	348	2047	2117	1022	331	2267	1354	921	1581	-292	972	551	460	539	1287	1402	290	605	375	600	1429	586	1000	1268	338	535	618	38	546	2083	750	467	762
276	498	477	1042	407	730	375	499	1640	792	18	591	602	767	1751	621	420	552	906	1038	1325	754	747	1054	743	2223	1341	884	942	1792	512	1523	1204	759	606	579	409	942	1391	715	574	2021	550	1320	783	932	1102	873	1119	725
277	268	425	343	194	317	198	461	627	817	153	295	931	412	1525	580	156	449	857	1117	334	337	748	437	280	1099	664	618	728	504	170	246	492	180	312	164	275	688	268	467	149	498	109	277	113	470	718	371	442	113
278	-169	100	-217	-244	50	-100	-199	-248	-103	-54	-274	-13	-293	699	51	-47	-193	54	-103	-126	-435	522	-272	-203	-41	-530	-212	-109	-76	113	157	-96	112	-71	113	-140	486	268	40	187	-333	-117	-392	-247	-88	156	-177	-702	-154
279	-198	-1102	-137	-457	-298	-220	-275	-288	-324	-129	-287	-310	-282	-392	-408	-84	-489	-404	-559	-377	-355	-414	-431	-259	-750	-1239	-815	-181	-865	-303	-1229	-711	-353	-222	-360	0	-370	-150	-109	-408	-522	-237	-541	-165	-337	-483	-117	-769	-261
280	71	-144	-193	54	-69	-229	-28	-3	43	-75	-203	-5	-87	3	-9	72	-45	20	164	3	136	-81	115	-207	-124	-737	166	61	-21	-216	-68	-91	2	43	90	-129	-84	-134	122	-16	-164	23	110	-221	166	-71	-41	240	-17
281	72	58	128	89	546	20	24	147	214	10	-13	111	42	-42	-37	10	14	-23	-55	3	103	663	305	96	417	-54	196	155	115	148	-42	-30	-35	204	152	18	243	-50	80	92	207	-6	-45	-72	69	1082	116	-19	-51
282	1847	1744	1229	443	2548	882	1114	2559	1294	723	548	4490	769	9575	1641	701	3153	1611	1256	3204	2211	4250	1232	599	5266	3976	4040	2499	2647	326	2044	1200	803	1088	309	894	2350	3244	1828	979	2065	1146	1338	832	1461	3433	743	2634	144
283	2310	4998	3028	2364	10014	975	1909	8031	4477	1139	2333	2848	2136	5695	1995	1286	4282	5441	2485	5235	3072	3929	3872	3094	5843	6528	3231	4426	4620	2730	6862	3724	1718	3746	1448	2967	5716	7889	2580	3477	4058	1960	3483	4781	3656	8047	5343	7782	1646
284	78	199	11	-162	177	46	19	-107	81	30	-39	593	13	882	372	173	129	196	509	98	-38	586	-5	-59	1140	460	474	84	169	-182	-15	107	-1	94	27	43	-328	33	82	174	58	74	88	-28	106	180	-110	-207	96
285	65	819	235	315	832	163	119	771	180	346	150	782	391	6067	4292	104	1313	638	583	1237	6248	766	312	215	3196	5222	1024	206	2093	254	1828	1041	452	536	195	561	2403	3864	1227	843	2935	267	894	267	1453	901	189	1108	37
286	25	55	-26	-50	-139	-71	4	-30	75	-46	33	106	-26	181	21	32	10	121	164	119	165	50	119	-7	256	79	225	10	-43	-235	31	48	245	10	66	-64	-179	301	-93	-43	174	-81	36	-77	159	213	-64	83	96
287	139	306	62	244	209	102	177	251	127	3	125	149	143	370	99	160	113	49	178	317	293	278	156	191	128	203	275	143	109	79	225	142	87	149	160	201	423	762	90	10	227	147	203	259	194	218	101	341	268
288	445	704	321	317	1048	742	377	328	573	216	411	239	287	748	578	460	137	274	490	222	1000	1075	441	223	671	324	497	728	389	341	73	492	207	287	152	288	1048	2054	1102	522	643	432	471	436	207	691	392	324	357
289	1024	1163	1419	1143	762	526	1311	1160	937	445	1305	1397	777	3968	844	820	1456	473	1151	1378	725	3119	841	650	1443	1156	1902	1494	2428	493	1870	840	529	923	356	693	1513	586	1873	1023	880	1116	1047	934	981	1650	540	1674	573
290	12	-191	-122	-439	63	-84	-79	-332	-197	-17	-152	-111	-5	-130	-67	-13	-144	-28	-277	-141	-130	-53	-83	100	-244	-546	-134	-53	-285	-64	-126	-188	-14	-9	-31	-30	63	310	-2	89	-372	-8	-239	-336	-191	-145	-46	-335	3
291	15099	10322	12568	12357	2923	12508	10735	6226	17247	15203	17250	12808	10576	13276	16938	24295	11660	15984	21709	9670	12486	18949	17011	12063	12674	19363	16856	17351	10666	15640	8948	14990	17675	17004	13943	12475	4414	3638	16613	10713	7995	12663	11208	16518	9204	17458	14810	10977	22086
292	1534	1521	2331	992	819	859	1405	1207	1116	568	1192	1290	783	3146	1400	750	1747	785	1162	1688	846	1870	843	769	1022	2266	1496	764	942	280	1613	1656	1261	733	845	1137	603	1844	1361	952	295	2091	936	1185	994	2335	979	1052	436
293	1738	3090	2662	1383	1938	1504	1314	2328	1432	891	1204	1237	999	2315	2343	1123	991	2423	2066	2390	2995	2517	2197	1514	3104	4097	4129	2437	4878	1078	3489	1352	1501	1804	1530	1805	3811	2800	2295	1706	2437	1294	803	1598	2096	3915	1464	4403	1762
294	28	-80	95	85	-508	-30	188	285	-77	-19	4	11	61	173	8	133	86	-54	-216	324	888	-62	-204	-138	-114	-44	268	48	-104	444	26	-105	-120	-74	-121	145	518	846	144	-133	440	111	-176	-22	185	-259	-94	349	51
295	543	1017	1781	831	4301	-142	521	1751	462	575	1448	1165	532	1750	399	396	1056	3844	1222	1138	-41	928	1458	367	783	1544	844	1029	1337	-151	1156	302	492	598	904	619	-5939	-4837	1475	-4158	2519	1180	237	1208	1195	994	1056	2575	336
296	175	479	39	7	667	68	293	456	230	86	675	256	751	107	469	156	109	-92	346	624	1441	-11	367	132	228	1290	615	209	1194	197	1156	351	-59	469	97	231	1069	-33	341	174	-33	32	413	150	116	370	186	291	-213
297	413	476	319	192	114	144	93	419	354	154	166	548	186	197	298	118	247	205	542	130	269	349	381	-1	261	146	523	454	564	53	236	316	160	254	289	348	-370	226	416	171	701	59	460	287	243	406	282	680	137
298	97	1126	133	48	190	60	652	432	514	-24	149	326	194	2874	401	410	453	745	1762	341	236	897	396	158	2178	270	831	321	690	330	1592	399	380	195	109	108	984	1165	645	389	227	302	562	218	749	1444	150	797	151
299	2887	3345	1173	390	4587	996	3551	3069	2967	399	1537	2740	1790	8050	1813	1880	2188	2206	2461	5214	3753	8274	3556	1123	3143	2650	6728	8578	4554	1442	3846	2595	1380	2326	1154	1583	7463	3781	5108	2163	5426	2751	4187	1222	4701	6441	1089	3465	986
300	159	330	299	76	476	223	199	798	548	46	362	217	165	366	183	150	230	488	660	56	319	228	331	395	139	495	255	237	663	360	488	240	195	195	281	281	1566	469	264	579	541	29	530	397	243	532	262	1058	254
301	156	437	177	-527	-88	134	71	570	142	17	92	240	26	186	277	52	125	430	427	243	-47	217	120	166	388	209	514	-79	597	-22	147	22	178	55	-11	187	222	486	192	43	749	64	-268	279	194	328	191	207	79
302	636	-124	42	-252	38	118	15	-43	213	152	410	177	-162	61	453	300	0	115	401	-208	319	16	0	-172	-27	750	39	53	-427	-193	-604	200	66	163	270	9	-243	352	-40	-65	957	-6	20	-3	-37	446	-101	-288	13
303	39	50	0	-91	-120	94	22	-57	33	12	9	90	-39	18	98	20	21	155	197	-215	38	250	42	-110	49	3	-6	0	-268	167	-152	182	18	-29	125	67	201	-100	77	51	193	-10	-146	10	80	100	-13	-44	0
304	133	-102	51	299	514	88	328	691	-99	86	78	-70	-21	-289	-53	29	-31	167	-60	454	370	-57	43	316	-191	613	-186	242	191	497	504	-107	-258	145	301	228	984	1651	341	174	116	267	431	277	-24	17	304	209	134
305	283	626	421	153	305	95	110	402	218	100	222	174	154	281	146	140	600	323	365	274	59	277	367	23	261	111	-9	314	652	132	609	657	491	78	109	434	-84	721	165	253	459	6	-101	176	288	612	98	-212	130
306	135	80	108	28	12	79	153	46	64	-46	181	125	114	-31	17	100	40	173	230	151	65	351	42	21	114	66	170	76	93	-231	-99	74	123	41	19	85	254	-360	149	65	-120	126	187	67	134	177	-5	2	178
307	188	234	88	269	374	142	188	295	565	37	104	220	23	1000	297	176	308	190	563	148	284	334	231	179	864	435	363	79	394	144	273	494	357	179	148	145	508	796	245	272	338	66	65	96	56	704	162	265	72
308	2261	2301	2203	1149	3031	1274	1762	1472	3868	549	1312	3981	1864	6084	3147	1295	4758	2123	2547	2298	2838	6956	2292	974	5434	4542	2999	1888	1578	459	2627	3844	1825	1315	602	1298	2138	2397	1662	1703	1663	2149	1352	1290	1933	5322	1419	3253	357
309	113	216	75	205	749	36	28	130	268	19	142	108	138	217	258	44	155	95	249	-126	150	167	142	67	393	187	52	51	120	-49	141	193	413	70	109	94	127	360	146	247	266	23	252	93	129	385	53	254	37
310	2757	626	1047	252	1639	2193	372	1905	422	146	46	161	386	365	114	170	652	-127	96	200	734	422	956	79	681	1703	350	840	2104	1097	530	369	1988	1735	1338	399	1270	595	528	927	290	719	223	3677	610	1821	316	814	41
311	-13	-105	-166	226	-44	-195	-177	-389	-113	-122	-94	-116	-261	-142	-71	-175	-116	17	-250	-310	-142	-98	-166	-100	-92	-626	-248	-112	-131	-337	-756	-215	-70	-99	-109	-94	-264	50	-210	-277	-1064	-102	-214	-77	-118	-78	-313	-165	-209
312	880	368	883	663	146	150	228	1392	645	261	443	548	245	1063	431	269	592	427	369	645	840	238	815	247	523	1026	491	799	641	535	1765	830	26	254	227	499	1090	804	635	623	841	627	884	707	809	1057	574	1430	470
313	4	-222	8	153	-50	-40	-35	80	-170	-1	-16	-30	-42	-302	-5	0	-8	-92	-161	-165	-82	-62	-154	-45	-122	-181	-157	-40	126	79	-21	-155	-80	-1	27	41	264	-167	-21	-29	-319	-119	-218	-115	29	-104	-98	53	-48
314	67	387	110	14	152	88	39	191	333	130	92	216	45	472	173	84	138	181	339	155	148	717	69	-79	271	60	189	0	460	-3	325	307	239	98	133	46	-190	176	72	57	48	-8	74	116	106	348	17	179	-134
315	1131	1833	623	241	1035	1232	1360	1808	2099	451	816	931	1166	5111	1531	566	1342	1296	1531	2340	1195	2817	1187	644	1538	2237	3706	2172	2312	220	3236	1575	489	1172	1260	612	3260	1425	2012	1167	1881	1154	1927	1345	2030	978	989	2385	408
316	597	408	82	287	698	166	13	16	54	110	267	367	106	112	1221	47	121	54	-56	408	3347	71	253	593	198	298	471	764	21	0	662	102	25	1349	156	140	307	997	149	204	720	14	15	480	-5	313	986	767	-41
317	22	87	88	138	38	40	75	238	96	48	41	104	-26	121	53	56	87	83	105	155	32	57	58	77	131	410	225	17	-27	64	78	98	191	125	113	-55	158	217	69	-100	193	57	279	27	99	57	10	165	209
318	15	11	-117	-37	63	53	-117	207	31	78	-21	-30	45	-1	14	-13	-35	8	37	-95	-103	20	26	-15	41	-174	39	-45	-54	-7	-157	50	49	-6	-160	76	21	402	-13	32	-4	-14	-158	-135	24	16	28	47	30
319	4	248	104	-291	120	-47	-33	-144	-11	0	-46	-22	95	-123	24	-9	-18	0	93	-38	-26	132	11	126	31	429	-114	10	-230	11	246	-22	79	18	215	48	0	-159	-72	46	-53	-102	60	-79	-121	21	-4	-125	-54
320	4	-155	-37	-42	-95	-1	11	-117	-11	-32	-22	20	0	-107	-1	40	-1	25	-5	-98	74	-54	17	-17	-11	149	108	45	126	182	-89	-28	-110	51	3	90	-158	33	-109	103	62	-2	18	-5	5	16	62	81	130
321	74	-194	42	-22	311	187	-6	50	82	110	22	13	117	281	117	-49	83	389	221	35	257	273	72	197	112	301	428	281	43	174	157	138	175	79	105	43	158	268	210	24	106	186	38	-5	136	182	102	324	127
322	1275	1763	1626	867	972	819	970	1502	676	607	689	2356	708	3402	612	390	1437	222	565	1579	796	4070	1145	678	874	2511	2203	1221	1600	694	1923	633	763	1275	598	880	942	159	2081	462	1107	1073	1350	878	702	1749	828	1226	498
323	2295	1741	2229	1233	2039	2131	2548	3059	1785	550	2568	2000	1646	3145	1418	772	1805	1045	1290	3793	2267	2881	1977	1936	1069	3677	2436	2317	2274	1579	2795	1283	977	1746	673	2227	1799	1936	2671	829	1992	1812	2110	1928	1524	2641	1864	2774	1164
324	1693	1131	1397	226	521	398	608	1673	1963	468	1093	3418	548	2842	1329	1058	1612	462	1331	708	778	2449	1214	219	679	2469	1502	1011	838	250	1339	2046	932	875	387	767	1143	930	1403	693	1620	1144	677	724	792	2689	807	1410	701
325	136	383	48	-132	413	136	86	167	216	78	223	174	314	484	235	56	126	92	459	334	600	212	303	29	407	3683	304	263	493	410	1056	238	193	210	-15	187	434	318	176	157	541	19	300	159	234	396	174	579	85
326	345	873	1118	491	756	461	748	556	1183	394	303	941	532	4124	340	544	450	993	1508	927	429	2195	417	177	484	1293	1362	764	909	250	1014	855	286	443	395	621	793	326	1134	514	512	752	767	284	992	1138	211	571	302
327	924	2029	1466	1087	1455	685	1502	4039	1738	458	734	856	1854	4222	539	556	1275	1374	752	2644	2125	4384	2933	1773	1006	3849	3965	3007	3579	983	4135	962	820	3704	1585	473	5049	3135	2497	1679	4164	1643	2756	6113	1899	3571	3074	5103	1216
328	245	455	53	308	76	114	39	738	203	108	215	870	205	224	53	121	-74	537	117	341	500	437	476	-23	151	514	540	546	970	216	535	3	336	299	234	120	476	670	229	258	633	107	-209	423	-67	909	38	764	182
329	130	217	150	35	-6	42	-28	184	149	-78	106	269	53	134	8	-16	79	43	210	91	-11	50	-19	130	76	-165	9	66	-49	-18	478	141	-55	38	97	55	222	662	69	27	149	32	72	103	101	217	99	103	-54
330	210	221	59	-263	298	140	4	-473	241	-41	-41	360	151	1540	338	129	205	164	304	289	245	155	106	33	539	3	157	104	-191	15	289	234	68	312	-125	76	21	804	491	473	-788	169	-36	44	260	692	-40	-41	-536
331	831	987	1235	942	21452	1149	1174	1771	1743	508	1330	2452	831	5108	1348	763	1733	1701	1677	2016	1882	708	1678	1210	2030	3397	946	1379	2274	1435	2485	2778	1741	970	309	1338	5547	5944	1705	6588	1475	1037	2036	1196	1661	3284	1349	2208	783
332	785	33	692	-383	463	337	737	607	2261	448	466	4091	127	6960	1483	746	2296	1920	1637	331	731	1901	1049	-27	4337	158	1083	528	-38	197	120	2409	1471	779	-54	547	-529	-100	1350	707	328	604	593	38	1178	3244	40	-173	206
333	439	781	488	-42	679	375	275	691	795	78	370	453	263	2907	743	258	672	690	1008	345	349	1789	715	454	1973	1001	766	610	718	588	535	1073	489	319	270	94	677	301	194	685	396	224	530	350	359	1393	265	456	309
334	181	487	31	56	285	107	166	308	208	34	223	184	37	20	165	81	178	176	368	250	509	106	126	172	299	336	150	380	471	311	551	248	166	114	262	244	74	871	269	274	401	282	191	387	202	311	216	400	202
335	118	259	135	-65	50	21	-8	23	72	90	13	50	119	-27	94	78	98	-34	189	183	62	136	113	-17	145	76	199	-2	-685	-235	236	72	76	149	211	32	730	217	277	5	96	-55	-130	-110	56	159	-32	58	178
336	186	400	70	84	209	198	321	305	347	17	49	242	55	1125	419	166	411	381	614	521	195	640	248	338	846	597	563	242	761	250	551	426	228	185	31	127	582	326	312	356	353	156	259	206	427	733	129	688	65
337	257	78	53	241	1728	95	64	-234	643	337	467	627	-170	595	590	612	123	378	466	-126	-50	371	245	996	354	-686	212	76	-542	-243	15	239	123	527	-152	110	-1016	-251	5	171	-38	107	-31	1010	61	410	929	-282	-51
338	143	563	97	229	305	231	-102	301	324	74	92	328	314	435	299	106	389	407	318	317	405	283	394	134	602	975	340	260	350	318	383	658	767	79	238	115	137	310	50	65	-48	164	354	223	164	437	70	142	154
339	1946	1304	2784	1155	4079	1286	916	2308	1402	776	1470	875	1534	2084	1017	998	1230	831	709	2231	1876	1150	1964	1370	1774	3623	2148	1699	1753	1325	2028	1204	1376	1091	1111	1377	1333	1970	1347	1409	2050	1866	1361	1879	1504	1819	1852	1385	996
340	248	1019	425	542	0	236	415	704	637	217	194	668	-109	2041	901	235	659	548	573	592	769	1064	774	257	1894	785	566	531	811	296	1623	720	268	303	364	335	963	2012	565	1251	889	668	778	333	537	1535	335	593	388
341	155	43	90	289	0	95	155	275	318	126	169	258	-23	633	74	173	111	225	364	45	103	521	193	83	342	31	419	40	208	-11	336	119	-41	175	125	240	95	226	320	155	140	132	108	226	99	403	53	103	285
342	98	-328	0	-198	12	-59	-55	184	-322	-41	-23	2	85	-174	-90	-93	-68	135	-269	-14	-100	-223	19	29	-159	-241	140	140	235	322	-425	-149	-340	-29	183	-6	-465	444	253	-185	-29	-164	-180	71	-127	95	-67	-725	-412
343	1349	353	563	512	959	432	497	1197	1199	369	842	1866	666	2756	1217	886	1851	1062	903	1272	482	1758	1081	1042	1467	835	1388	922	1107	588	1466	1272	718	1484	-35	894	793	1257	1016	108	836	572	1047	1066	807	2695	838	940	642
344	259	227	97	-28	196	169	250	154	-67	195	29	289	-55	1058	211	203	295	135	192	211	-26	844	78	-98	646	-375	965	102	564	-212	252	365	144	67	172	-32	508	871	600	312	-43	64	212	50	333	364	83	-5	113
345	18	-92	6	188	133	85	42	-26	-46	32	31	30	-47	-297	56	52	72	115	-18	317	-2	-91	-75	90	31	321	144	63	142	87	-5	19	-123	-1	11	27	74	50	272	65	193	96	51	45	110	-18	5	-100	-3
346	3	11	-46	61	-25	14	31	-60	-75	44	-76	-37	26	-57	2	-26	-60	57	-18	-119	-74	2	-10	122	64	-3	-19	-25	21	-216	-15	-24	90	70	-58	-23	338	-100	173	57	-178	-10	63	-37	43	43	31	-226	151
347	645	1040	1209	1370	1309	448	759	1080	697	355	979	808	1156	1318	400	450	639	961	933	1417	1426	834	1204	1002	813	2011	1388	1448	1419	1355	2249	1046	940	740	446	820	2244	1592	787	819	1107	863	1286	961	904	1170	922	2455	769
348	94	65	0	46	152	43	64	67	143	67	46	105	47	225	119	56	35	11	315	81	130	284	87	128	171	403	222	186	263	205	373	86	75	133	70	191	529	125	218	127	207	-32	121	82	112	334	117	307	123
349	139	-152	75	123	-95	156	-17	13	22	-16	-3	167	-98	164	-18	78	12	-193	-83	155	-8	351	48	29	-90	-518	-16	-17	-65	68	-320	68	17	49	-7	131	-74	335	274	43	125	164	-22	154	31	98	23	-44	-85
350	697	2150	998	966	1378	568	717	2911	921	259	1062	1600	695	2493	1603	312	892	1262	1823	1477	819	3195	1081	1107	1670	1198	1365	1714	1978	710	1628	1673	1048	790	1467	674	1566	1442	787	653	1301	773	1754	1505	902	2843	1046	1699	415
351	312	489	330	194	648	314	182	577	245	81	193	426	756	961	227	307	187	467	397	1244	1024	106	346	282	646	959	1270	564	915	634	451	447	339	449	109	379	1016	402	525	323	1030	355	153	430	741	599	486	2040	288
352	7	-18	57	142	-31	137	175	318	32	9	101	365	90	505	176	173	169	153	137	179	452	20	258	247	163	-193	314	459	460	246	-5	162	82	262	101	159	-52	469	221	29	159	143	128	55	183	439	88	-335	168
353	2620	2021	1342	1340	3164	3355	2688	2378	7977	2041	2629	5302	1172	12224	5133	5306	2252	5311	7522	3648	6234	2190	3739	2780	2469	6798	5851	4147	5623	2411	3967	7599	4266	4470	1980	3228	4298	3965	5871	6316	7613	2399	4079	3215	5509	6648	2468	5120	3852
354	176	328	33	611	635	208	130	-385	10	-19	177	99	-242	287	103	30	83	72	259	162	529	35	-78	144	362	378	347	-89	597	212	126	487	126	207	211	71	1069	905	250	310	-261	325	374	-189	185	176	311	921	-92
355	375	6	-124	69	266	-7	-71	-77	344	108	177	286	269	610	9	87	135	34	50	380	204	498	-80	130	88	-181	121	86	-76	262	-467	64	123	111	-301	219	-52	679	24	16	-120	-113	776	52	-65	793	243	-97	140
356	201	460	212	-114	209	121	170	231	154	103	108	505	106	1811	293	200	386	196	432	518	375	659	148	179	265	540	635	687	1085	205	388	409	181	307	129	194	878	310	672	370	483	242	638	260	361	668	262	610	501
357	161	601	8	179	2268	20	190	650	178	-15	339	203	266	756	263	86	279	355	316	454	414	217	591	43	584	762	337	278	1255	132	851	435	241	247	528	62	899	3269	304	1235	517	244	686	584	468	565	334	1005	728
358	79	408	212	46	203	118	82	221	453	33	160	421	138	597	349	67	239	164	106	352	784	220	316	-51	171	295	461	503	323	307	698	290	102	129	-3	11	677	712	37	220	53	83	-117	50	28	716	116	137	175
359	175	30	212	-123	190	31	-79	271	283	13	-17	196	-45	115	71	49	257	-69	296	-215	233	172	231	-116	1	355	-3	247	76	45	462	52	330	29	-15	-6	-127	503	-58	21	-125	-25	-128	164	116	551	80	232	30
360	102	62	55	18	-12	36	157	6	-36	12	53	156	37	903	235	130	54	46	149	126	171	249	125	79	1169	92	609	30	268	41	231	235	9	204	11	106	296	536	536	141	207	42	180	165	438	315	149	229	0
361	-315	58	-1277	-1958	-2535	-1154	-830	-1841	-616	-180	-1500	137	-3343	1701	81	-220	-746	-534	-1030	-2549	-923	668	-211	-2699	909	-3919	-62	-1247	-2992	-3056	-3510	-1618	-1283	-242	-223	-1726	-1746	-2146	-77	-753	-2544	-1311	-2411	-1735	-934	-413	-1556	-2346	-415
362	450	554	650	300	590	358	614	1140	376	243	283	565	1038	1063	374	510	696	1008	897	1501	908	512	1072	838	1162	1478	857	776	1616	782	1628	1021	454	440	403	531	1630	1358	699	759	885	666	1092	907	612	570	588	2178	168
363	658	1010	264	-265	260	239	490	426	773	138	409	932	492	2328	626	504	891	1068	426	683	384	1074	773	369	1865	988	841	293	405	121	956	1150	449	388	262	191	127	829	451	323	14	486	449	611	382	1374	307	685	-106
364	1213	1776	470	246	3297	271	572	895	1092	530	651	1301	841	4630	1710	501	1859	1863	1598	2090	1539	2307	1254	747	3261	2444	1800	965	1019	698	1434	1223	906	1004	1002	427	2265	2280	1478	1687	1441	619	1334	755	1916	3652	810	1615	604
365	43	174	15	-134	50	13	4	-261	18	-95	47	79	7	154	43	-12	26	37	102	0	-17	71	108	41	218	31	55	43	-93	-193	-110	96	97	-35	90	-2	-137	-125	-10	-40	174	-74	-33	-33	84	128	-58	27	-147
366	105	665	44	28	355	105	139	258	122	136	121	149	114	270	237	81	198	372	402	197	381	252	186	472	616	25	356	94	93	345	336	510	459	173	19	53	455	-226	66	291	420	137	218	148	243	348	146	702	-13
367	71	21	-13	-29	-44	0	19	97	-85	-38	115	68	45	203	17	1	-18	-66	8	102	227	126	140	205	104	85	248	153	21	375	267	-48	158	122	-86	60	-158	679	72	136	261	-8	221	110	157	-35	185	240	85
368	656	1914	1275	1257	1264	645	639	2200	1545	562	1454	827	1390	2935	1167	643	998	1175	1267	2369	1885	954	1445	1004	1280	3111	1964	2062	2669	1993	2853	1860	1582	674	731	1155	3250	2079	1305	1270	2220	747	2332	1836	1245	1459	1085	2690	838
369	3202	2648	84	368	260	848	821	536	579	548	878	602	258	1862	3332	1256	462	1756	1092	4710	11571	1006	1250	482	2885	2377	1293	2573	2965	37	6237	1210	1267	855	1107	-83	0	13673	3784	849	2776	229	997	787	1097	2045	223	1780	532
370	480	732	521	1035	800	433	936	1184	1024	119	760	813	841	1532	953	1155	537	1969	897	1142	1210	849	815	793	2473	1506	1869	1520	2307	736	1823	978	813	793	105	469	878	1089	976	497	1615	424	1203	829	779	1238	701	1758	948
371	2572	3902	4612	2213	1804	301	1838	3670	3715	590	1089	4126	5591	10059	2555	1152	2600	1819	3243	2827	2380	8200	1674	1127	4654	5174	6853	3191	4077	603	3678	1637	1335	3682	1424	1842	6965	3018	2847	519	1900	1512	3603	2007	3186	5772	1402	3362	711
372	25	-132	-64	-162	-285	-33	-202	-100	-41	-37	-263	256	-93	686	160	140	9	8	169	-109	2	142	-20	-154	234	-177	78	130	-367	-417	-451	145	-137	22	-137	127	-1291	-276	-109	62	-164	-115	-191	-186	134	217	-134	-92	-79
373	765	181	168	444	171	252	-39	446	364	167	324	819	98	357	313	253	371	196	299	539	331	354	174	201	293	505	166	245	668	216	236	212	46	278	230	71	349	1467	-8	231	522	182	291	406	11	418	223	697	151
374	202	206	354	80	222	81	82	137	74	20	45	406	311	496	178	186	98	245	482	109	112	700	112	31	411	76	510	104	104	125	-78	178	-11	239	191	76	444	226	160	165	101	62	307	64	219	456	55	190	247
375	2072	1691	1036	557	1042	1454	863	1298	1637	463	1531	2398	756	1583	980	1241	1081	384	2027	2721	1645	2470	1406	1334	955	4815	2360	1487	1726	979	1555	918	620	1217	563	1400	1333	1098	1654	938	1397	644	1553	1190	1234	3051	1104	1878	518
376	560	784	1222	446	489	495	996	778	946	293	868	819	1326	3204	1053	740	999	673	1713	1600	970	1448	1085	822	1051	2259	1633	983	2044	823	1681	1082	940	724	481	940	592	1416	1214	590	996	1017	2018	1039	1159	1802	877	1760	580
377	-59	263	410	485	463	217	179	-16	61	107	214	312	61	366	97	106	82	147	0	274	538	181	144	346	90	-197	130	582	504	72	-509	11	87	101	203	60	0	729	499	174	802	299	309	321	-13	260	256	450	340
378	413	858	634	87	724	271	217	764	839	204	395	554	546	802	408	190	485	889	885	736	1092	436	839	302	858	2031	929	863	219	402	1418	1110	505	479	7	150	931	377	301	416	493	134	905	416	530	1064	435	366	477
379	961	1568	459	398	1842	732	526	1291	842	475	488	1767	341	2105	483	1181	936	1042	1356	1258	2676	1549	770	118	1674	1986	2423	1231	1666	759	2096	1388	889	1349	411	261	1026	1492	1547	859	1746	1017	695	695	1178	2193	599	1912	-3
380	67	289	197	164	19	60	-15	281	239	6	100	119	0	287	149	95	132	184	173	250	106	57	158	231	106	638	261	189	235	208	315	203	116	21	97	187	-179	-8	128	-13	377	338	241	66	162	109	252	417	-34
381	75	293	31	-254	247	79	-91	261	302	123	78	167	63	315	211	33	150	262	442	42	248	114	172	-71	285	381	288	214	131	-231	325	303	48	127	133	101	201	125	173	32	212	162	18	91	221	398	70	167	10
382	9	-20	42	209	-31	-15	46	90	59	24	-11	24	90	30	-50	7	-9	54	-58	204	121	17	37	-33	-47	-209	26	12	-27	83	-10	-6	15	-13	43	-27	42	0	-141	-16	33	2	-171	-71	13	6	-41	-86	96
383	128	-50	8	151	1849	624	168	788	-181	-121	9	42	-130	999	137	-78	195	563	-242	-271	65	255	148	304	116	-136	-595	-58	120	311	178	760	276	-177	-35	166	751	1416	-29	429	444	355	523	49	-18	90	155	-279	61
384	2952	1102	3780	1820	1652	1503	3292	3666	2825	1306	2551	2788	2413	4761	1876	1866	3162	1406	1407	3155	2835	2320	2977	2406	2670	4707	2390	3613	3255	1853	3331	3159	1924	2403	606	1922	2350	3060	2997	1434	3521	2170	3314	2859	2594	3471	2359	3331	1841
385	1045	1550	567	407	654	822	1183	1315	1362	631	890	2289	524	2619	1568	424	1633	589	863	694	642	2041	1271	401	630	1621	1044	950	641	299	520	1316	332	734	814	506	762	435	1115	440	730	936	596	426	917	969	555	929	127
386	612	709	2784	656	209	1664	1707	1378	873	272	1103	2069	341	2637	937	1055	1612	2033	790	1731	1127	2863	1172	490	2056	1198	1689	1300	1611	334	-331	1380	628	1288	434	684	211	176	1446	383	2016	1154	2061	638	820	1022	713	1413	883
387	-464	-315	-763	-1039	-76	-136	-603	-821	-361	-214	-897	-302	-1126	-628	-268	127	-582	-222	-655	-1660	-224	-403	-311	-518	141	-2545	-812	-1017	-1956	-1765	-2564	-721	-435	-332	-485	-543	-1344	-930	-643	-574	-3032	-246	-941	-1290	-588	-364	-1094	-2334	-1622
388	32	440	279	624	-324	95	166	476	387	74	168	230	261	457	200	53	281	491	423	193	461	131	483	41	508	286	350	245	723	531	-42	211	244	86	19	205	455	410	21	138	517	216	354	226	177	420	98	414	247
389	113	444	93	130	101	11	153	-40	27	60	75	210	39	530	227	163	-102	106	-11	38	227	349	-165	-83	498	-197	-219	40	54	-193	-609	-1	35	212	234	159	-508	-746	507	65	164	-19	-182	72	191	-36	-123	64	127
390	399	-258	70	170	-686	-55	-8	80	2	50	-90	1026	-500	603	469	-50	241	-346	294	613	174	420	-40	69	539	686	-170	178	328	-254	5	-210	334	186	-74	50	-158	-754	50	-361	164	424	-74	-10	191	207	-22	470	-604
391	88	-36	37	-254	-146	-7	-71	144	1	16	-9	47	-61	118	28	24	-78	-92	-180	31	41	-59	-124	73	76	-168	16	-20	-32	56	-26	-151	41	-15	-62	-97	222	-117	392	-114	406	-119	-137	138	-11	29	94	-201	-30
392	28	0	19	-149	31	-75	-51	-13	-41	-46	19	-32	37	-160	-25	-13	-16	-60	26	-52	44	-41	-88	-13	-63	-162	19	-71	-98	60	-231	-127	70	-55	-11	-2	-105	100	-2	-32	-43	-100	-164	-74	-63	-78	-11	-128	-41
393	67	181	66	130	101	-15	130	124	221	119	-9	130	45	415	161	41	192	219	317	35	20	201	136	29	293	171	127	35	-65	125	-89	239	166	35	74	53	52	536	160	76	130	-12	149	82	18	310	10	268	82
394	-137	-192	-368	360	-146	-49	-153	197	-228	26	-16	-128	191	-63	79	-52	-219	-72	-259	-56	148	-119	56	19	-261	-139	-101	199	-274	-337	-798	-367	-72	2	168	-55	-52	-159	112	-179	-203	107	-90	-13	-162	-243	-237	-193	-3
395	12	-16	2	457	-247	-10	59	-46	70	15	-10	18	45	144	89	26	-38	-40	72	7	133	10	34	-13	5	63	42	53	120	75	115	94	112	7	-66	-106	74	83	85	0	38	79	-9	69	84	61	19	41	-30
396	229	301	188	173	235	117	275	630	387	124	232	415	159	1340	230	115	250	441	673	102	290	756	377	156	971	282	556	321	93	30	231	297	354	314	-27	113	688	653	141	263	29	284	309	233	264	684	120	599	134
397	428	1092	-2	271	781	340	264	-3	972	18	101	130	-47	533	1155	392	197	335	994	327	1376	308	359	87	2591	839	589	309	230	53	551	798	295	545	223	-9	222	1106	368	261	740	167	322	284	286	1811	168	593	257
398	455	60	-28	267	241	14	46	-60	116	-44	13	156	210	1009	237	47	102	135	304	313	230	217	121	116	332	419	297	189	0	-53	78	164	144	141	0	73	-465	-268	184	125	29	72	130	52	69	326	53	153	13
399	340	715	703	723	-228	289	543	855	633	140	468	148	935	742	503	275	703	589	685	768	503	406	1135	284	665	816	1051	1045	1879	569	1387	786	488	628	195	355	-21	1827	629	585	1165	580	1149	944	582	644	801	1181	553
400	389	657	310	721	610	345	364	1808	1076	145	690	854	799	715	729	563	380	753	803	1138	793	700	883	353	1047	991	540	424	2241	258	940	299	326	278	187	240	1005	285	408	500	1997	619	1503	1200	260	594	467	996	1285
401	502	2175	685	450	514	408	399	379	1205	102	775	1169	226	934	539	286	523	748	1159	518	748	930	907	526	835	174	772	728	871	656	1271	884	760	589	1002	295	963	938	419	1167	338	265	291	729	391	2521	604	1173	659
402	210	725	377	185	317	233	304	285	454	154	233	546	335	648	296	186	323	222	933	306	254	2511	341	79	389	670	1044	730	394	280	388	278	200	208	113	305	264	1265	290	389	178	329	207	137	342	1123	186	470	85
403	619	647	721	177	807	517	486	409	1152	116	272	1499	737	2479	952	326	459	285	2022	680	846	1898	844	516	437	1293	766	511	761	125	562	399	190	927	274	691	1058	1014	789	672	1102	259	397	286	887	2065	338	697	391
404	185	65	13	35	-19	111	177	114	135	-9	299	121	151	159	196	184	42	138	361	35	248	180	424	168	135	203	330	278	668	-83	73	71	56	130	105	191	0	83	253	179	227	244	496	181	140	244	167	-50	374
405	196	72	352	-56	775	310	293	395	288	40	265	272	293	60	29	149	76	251	135	179	216	297	497	221	51	282	153	224	306	201	110	177	42	123	133	122	592	276	293	449	270	-32	349	213	82	306	108	271	48
406	492	-72	161	-7	667	256	457	254	1276	133	237	748	482	1962	380	572	170	811	320	437	805	840	184	524	720	677	1037	403	805	182	-252	283	123	564	54	221	995	746	848	326	149	426	505	438	573	268	432	551	274
407	588	6	232	-336	-146	89	22	295	177	-61	161	115	-95	-113	74	33	115	-83	24	-35	251	741	83	-181	-23	260	153	370	120	-34	-31	19	136	186	125	-69	317	-285	-21	-29	-125	40	63	860	5	1253	368	551	-96
408	-83	-288	62	-650	451	289	113	-600	-26	-272	-298	-132	98	-198	-220	53	-307	-184	-330	-10	-207	447	83	61	-244	-877	-533	-643	191	-535	-930	-384	-276	126	258	-104	762	-276	-56	-100	-449	-239	27	-196	3	-486	-126	-705	-68
409	28	-134	-159	65	38	-39	-35	-305	-132	-112	-198	-67	26	-209	-29	-60	-154	-51	-124	-296	-38	-23	-108	-120	-175	-384	-134	-79	-115	-375	-420	-67	48	-107	-129	-161	-84	167	109	-108	0	-134	-38	-228	-176	-192	-62	-179	-147
410	169	-95	199	-80	-50	336	-57	271	-341	26	145	-109	111	-152	-104	-46	-109	-155	-21	45	319	-137	143	407	-518	-1118	114	158	361	53	126	57	-174	99	90	-30	52	310	-469	13	290	239	0	37	46	-205	252	-47	10
411	1017	987	1144	543	959	469	481	1358	1665	317	869	1485	775	3846	1341	398	1158	1114	1639	1156	775	2859	940	1095	1733	2094	1149	741	1129	318	1649	1388	1097	763	454	346	1429	762	675	740	541	409	1320	1220	805	2372	838	1556	570
412	2226	764	736	248	610	572	326	1076	1612	307	545	1960	604	595	673	232	782	979	441	1025	970	1205	835	435	1223	1665	1823	825	855	626	1965	773	356	364	301	439	3038	586	512	410	2258	278	936	397	515	2469	558	1606	302
413	37	-199	-22	256	438	36	51	315	18	41	-4	0	239	614	100	36	198	-14	-37	345	145	184	110	195	189	123	114	125	-93	-3	168	-115	488	39	-113	120	-476	-176	120	-193	149	23	2	99	61	49	82	36	-75
414	111	-43	33	18	-50	66	-42	3	9	3	-20	33	117	126	79	47	6	141	46	66	-59	-27	-33	9	145	-31	-29	20	-60	-193	136	-10	516	18	62	-208	63	-100	-32	-81	270	-4	-9	-1	0	45	-10	190	72
415	315	417	303	287	349	191	399	261	495	166	663	374	772	1300	647	272	486	410	545	1434	550	267	430	397	776	978	615	373	696	717	719	547	300	310	446	353	-307	234	571	269	386	289	670	379	530	484	355	781	92
416	203	377	248	31	-152	181	133	459	123	96	113	384	42	636	160	123	279	54	173	229	278	299	229	-17	714	766	333	43	158	-18	425	179	361	77	121	30	-317	-100	216	111	285	-426	-419	44	200	427	83	879	-130
417	542	-315	485	515	876	271	390	835	190	279	194	442	165	1172	562	586	563	297	447	1188	669	727	700	399	906	2034	1493	1477	1742	531	1035	226	-110	608	230	778	317	435	998	449	1272	602	1146	601	1110	502	699	809	305
418	231	134	70	209	247	72	264	26	283	109	226	169	346	604	127	206	105	439	372	102	62	219	204	96	616	282	412	380	21	113	415	327	-28	31	144	291	-338	-167	757	-48	29	68	119	184	295	135	-91	170	144
419	51	-222	-39	50	-139	-57	-48	-70	-118	-2	-11	-8	-74	-143	-13	-53	-54	2	-136	-24	-118	-88	-58	-158	133	-101	-75	-10	0	-106	231	-64	-163	-70	-70	-9	10	293	-8	-24	-24	-79	-13	-67	3	95	-17	209	99
420	55	108	51	-106	165	79	119	-124	107	41	43	147	7	471	97	21	113	83	242	105	-94	317	48	-47	397	111	127	79	164	83	183	103	-35	39	23	-32	328	159	61	16	-77	32	2	49	43	326	31	279	161
421	-32	-90	-57	-132	-50	-17	44	-80	-7	10	-24	-6	-23	-43	10	-10	-12	-14	-25	70	-50	6	-121	7	-78	57	0	25	-120	-121	94	-44	-96	-33	39	-9	63	159	-176	8	91	25	198	57	13	-7	-5	5	96
422	552	559	1089	785	317	363	135	258	1019	405	769	1169	-18	111	727	918	173	153	442	408	449	731	363	878	508	228	527	577	378	311	57	541	466	979	1694	288	-52	192	525	223	48	72	266	843	256	1403	505	789	109
423	306	400	108	-9	76	204	239	33	557	179	145	598	130	912	501	290	551	436	816	253	88	845	200	365	900	104	533	286	405	205	430	488	278	314	113	85	476	16	98	239	324	267	334	167	232	893	276	92	79
424	325	528	406	366	838	333	337	1757	275	189	355	638	551	5014	180	264	779	774	593	1022	618	5378	417	142	732	1198	1768	1400	394	117	1266	545	-69	537	375	681	1408	1224	776	65	532	1062	740	440	1775	907	546	2432	-144
425	139	209	28	186	495	23	110	-73	125	24	6	270	47	933	125	78	91	83	274	211	298	339	21	-29	137	44	311	163	16	0	183	157	92	114	54	-53	328	176	176	176	227	197	-4	10	142	723	85	148	92
426	22	194	-39	59	-31	65	48	16	87	72	146	28	-39	127	104	70	-5	127	135	197	94	91	51	-13	752	321	150	91	104	56	304	223	173	67	125	-25	307	553	112	272	67	203	103	167	123	144	-10	229	61
427	651	3660	3097	1059	1728	919	3811	2207	2052	513	2463	1937	1710	4366	4166	578	2475	13339	3133	1667	2143	2330	2046	1166	3907	1891	2675	2320	1858	4773	3021	14150	8324	1067	4423	866	1990	2506	2009	1847	1596	1802	1589	1769	1661	7164	1235	4023	6701
428	64	241	33	97	146	102	102	60	169	48	67	44	119	236	123	21	90	144	199	260	192	92	74	-288	13	174	212	166	164	7	283	122	153	51	93	69	465	192	24	51	19	184	108	33	31	238	-16	33	164
429	100	196	79	-41	324	68	48	348	304	-47	13	86	13	1076	440	64	218	43	161	398	571	548	207	-266	600	327	943	408	317	72	-26	-5	46	94	258	2	222	544	285	236	401	244	-97	32	249	1068	-65	201	41
430	45	1470	79	-33	-44	624	958	1093	518	5	208	102	114	2511	963	724	177	-57	236	1279	1258	309	704	537	474	1176	730	562	1710	254	1949	154	96	517	242	168	1344	704	568	312	324	351	672	387	1290	1060	199	702	171
431	1102	2482	1597	512	1766	1642	2204	4377	2321	709	1739	1594	3055	6497	1685	1510	2934	2331	2349	5239	1770	2584	2021	1605	2007	3995	4024	2545	3272	2099	4613	2972	1427	1281	1135	1747	1799	2070	2348	1567	3081	1750	3501	1235	3002	3123	1214	4661	1319
432	125	149	246	-5	76	69	133	452	199	142	135	125	277	90	113	53	83	372	153	500	257	124	136	102	153	457	451	214	208	239	341	196	97	240	164	110	190	452	162	-48	241	128	530	103	213	176	129	69	202
433	-35	-295	-93	-285	-266	34	6	147	-152	-10	-73	-90	-82	-376	-43	-46	-84	-205	-101	63	-121	-95	-130	-31	-80	-368	-91	-97	-27	26	-304	-248	-191	-49	11	-145	-201	-662	-24	-92	-14	83	-173	-182	-192	-84	-58	-145	-30
434	73	-367	-28	-398	-133	-120	55	295	-278	-37	-102	207	-55	-240	203	-52	-61	493	193	186	-41	169	-711	-39	90	-1239	-189	35	202	-144	120	-30	-51	7	223	-62	-381	-226	90	-157	-91	-32	-92	-369	11	-410	-123	-559	206
435	254	-67	248	18	76	233	8	523	329	123	100	435	-2	753	205	233	227	-2	431	327	301	368	289	-21	252	-228	356	229	339	-41	-89	209	184	308	-35	115	190	217	779	87	343	237	386	-8	310	547	23	142	85
436	404	869	714	89	355	571	244	738	1567	340	462	1234	530	2883	766	475	363	779	1322	669	639	1797	730	320	1928	1023	1398	521	827	505	882	1277	395	472	172	314	762	737	819	511	551	404	526	145	792	1046	388	123	412
437	471	224	2455	958	698	487	714	1372	834	209	1537	889	1403	487	671	404	945	-69	828	1907	1027	777	1336	496	519	1986	530	1305	1079	755	1318	712	323	392	367	915	307	578	811	481	575	514	936	550	914	778	592	1660	302
438	888	732	1151	265	114	656	710	848	1142	698	454	1611	580	2329	363	815	1264	467	749	750	571	1811	1145	518	1845	1369	828	462	432	296	94	833	451	646	156	688	275	528	805	367	498	692	875	460	616	1483	504	515	189
439	416	1280	326	285	571	369	492	422	913	186	255	951	450	2950	1260	373	1178	499	1800	705	358	2007	519	118	2263	1315	1332	508	887	254	725	1674	850	279	211	275	889	176	987	457	469	201	496	272	743	2005	197	887	209
440	649	616	1009	222	1264	665	452	83	409	358	381	490	556	1351	421	267	388	309	283	980	1024	2173	488	164	1154	810	1054	838	411	220	367	418	252	266	219	143	-486	771	976	315	444	357	688	242	738	756	361	795	-61
441	834	1149	650	56	6	129	168	157	324	211	133	818	682	1695	563	170	647	2	560	148	124	1715	247	189	1191	57	857	265	367	132	168	537	239	622	195	508	211	259	533	-24	386	413	512	377	614	1243	305	226	-82
442	-6	341	292	527	451	137	15	-392	364	-165	37	382	-231	-299	331	-47	31	135	206	958	-5	213	576	-332	435	-1306	471	163	920	30	635	118	105	131	113	277	-2064	167	45	318	-164	218	787	313	174	296	264	1229	-762
443	203	410	450	478	838	217	224	546	397	25	309	268	399	411	180	90	268	176	341	1085	461	205	311	433	356	1640	376	378	1024	561	909	352	238	234	242	372	582	905	368	342	759	237	787	140	247	380	476	601	563
444	42	50	15	459	38	36	22	30	-99	-19	6	496	13	1420	57	-3	1243	109	82	232	-74	-47	98	51	76	7291	170	33	-93	91	257	17	120	13	-27	316	254	-58	136	108	145	36	-164	-27	20	45	120	-22	20
445	-267	30	-406	164	-108	-240	-588	-670	40	44	-183	190	-335	-17	287	-89	22	314	49	-271	-781	405	-192	-367	1091	-753	569	-465	-1008	-774	-972	-419	110	114	-31	-337	-772	-503	-109	370	-1189	-400	-571	-316	-226	77	-353	-1525	254
446	-78	-940	-177	480	317	-178	-432	-325	-153	-306	-384	25	-61	-18	307	-215	15	207	-92	-179	195	137	257	-618	293	-1369	-288	-61	-1238	-186	-945	-726	-530	113	-442	-9	-1842	-1106	221	111	-203	-134	356	291	-191	-7	-202	-949	58
447	119	253	2	123	266	68	208	382	246	-31	36	370	125	809	320	96	158	-20	358	169	331	421	217	142	175	-95	438	-25	476	121	183	617	93	199	-27	115	95	519	149	174	-48	239	-176	196	191	602	150	243	144
448	-137	40	-86	-437	-120	-7	-6	-137	128	-95	-81	-29	5	-221	-14	-9	-45	135	88	-236	-186	-18	56	25	147	-203	26	-263	-98	-334	-462	32	-180	11	-117	13	-434	-821	-101	-97	-183	-265	-76	-218	-5	1	-34	-335	185
449	340	36	79	48	673	133	148	10	230	12	153	320	-21	675	243	155	129	92	288	151	293	226	163	144	179	330	301	209	323	-106	131	194	124	314	-109	277	42	-301	152	206	295	70	228	-25	168	431	168	181	3
450	1286	1424	2012	816	718	704	1578	2136	1289	627	723	988	804	2667	1343	464	2397	179	817	1121	1142	2262	1501	793	907	2511	2200	1144	2269	470	1355	835	1460	1002	606	667	698	1592	1176	514	2152	1467	1438	997	1150	1801	1092	1408	780
451	161	363	99	142	254	136	319	647	650	171	221	323	285	470	367	160	166	667	317	419	748	221	508	181	303	1099	540	380	301	398	530	261	323	167	93	140	614	477	338	46	532	117	591	448	239	413	91	467	274
452	81	88	2	186	0	85	35	130	66	6	-13	49	29	131	42	115	37	14	148	165	139	45	144	5	61	-95	153	7	-49	79	-78	34	-4	39	97	108	-31	662	8	2	275	23	72	-33	3	92	114	240	99
453	629	1097	481	5	1175	607	326	1321	1550	214	339	1562	511	2805	830	266	644	297	898	172	500	2585	600	401	1294	645	1106	439	668	284	336	767	566	1002	140	281	561	964	496	753	207	302	246	531	515	2779	425	529	257
454	374	239	1435	280	686	269	617	456	695	51	240	815	370	559	619	107	931	-213	135	63	-50	1879	1033	128	750	-314	-45	838	32	87	1318	156	874	620	383	238	1280	1928	523	1058	256	246	1133	245	550	1425	370	1732	670
455	10	-105	-124	-186	0	-66	6	-100	-35	-24	-43	-48	-42	-94	-6	-6	-22	49	1	-98	65	236	-24	-51	0	219	-19	-15	-10	-186	-304	-87	-151	27	-27	4	21	-33	-29	24	-48	-102	85	-230	28	209	-26	-97	-85
456	-236	-735	-625	-543	-2363	-288	-463	-791	-598	-170	-704	-219	-487	-378	-337	-100	-304	-467	-497	-564	-343	97	-707	-723	-254	-1538	-239	-623	-871	-1116	-924	-898	-505	-142	-641	-318	-2318	-1383	-229	-538	-1030	-548	-873	-699	-395	-679	-591	-1660	-584
457	1291	2001	1468	-214	527	1101	1189	620	1651	362	1301	1388	250	2720	1866	729	975	990	760	1477	1432	2332	784	270	1364	3474	1352	1607	876	797	1497	2388	733	1342	681	552	307	1307	2524	712	2442	803	790	1003	1247	2668	782	1033	271
458	-93	-906	-119	-282	-381	-44	-202	-322	-316	-265	-146	-137	-85	-717	-201	-75	-263	-158	-689	-267	-192	-457	-270	-140	-618	-518	-707	-324	-230	-239	-441	-386	-285	-162	-391	-171	508	-167	-74	-65	-904	-156	-386	-123	-254	-328	-182	-629	-85
459	147	-414	224	-188	-718	117	293	184	-299	-156	279	-20	149	-89	-200	92	-152	77	-487	133	689	-237	359	492	-102	282	-451	383	279	-463	-68	-120	-221	14	-3	277	486	-58	808	100	14	-6	480	138	187	16	280	1212	6
460	154	-249	366	-450	-235	258	-39	355	-145	108	623	553	55	401	21	184	-383	1207	-301	528	991	41	524	152	594	314	-45	-17	465	-588	-977	-258	-141	279	-665	462	-1312	-251	346	546	-232	-415	-623	177	-35	202	274	-1044	65
461	66	70	77	39	241	43	150	40	95	62	78	76	-77	64	61	18	75	112	99	119	29	68	47	75	191	41	265	5	-10	64	147	281	174	-38	31	87	455	259	122	103	82	21	27	67	88	137	108	36	243
462	814	2395	346	162	3819	868	1991	2200	4591	305	1846	353	330	8993	4856	2852	5180	4006	4331	4213	7962	6266	3768	903	12877	912	5183	3932	3020	1716	4145	6689	2564	2985	1123	402	2953	8928	5649	3739	5992	2406	4194	1003	4151	7158	1741	1318	2144
463	631	1525	843	282	972	737	685	1288	1370	176	821	958	721	1225	847	456	1020	534	1057	1674	1071	1222	1015	862	1634	2326	1316	988	1446	558	1276	974	784	649	501	369	1736	804	1112	666	996	509	1573	727	891	1587	1008	1131	278
464	3009	5214	9728	6119	7796	6062	5811	9577	9777	4449	5424	13880	6777	14487	8640	8094	10501	14482	10519	9297	13788	9664	10674	7791	18819	7513	10946	10727	9860	4936	8780	14367	7245	7679	2841	5477	8066	15442	8318	8438	8648	6310	9071	6658	13857	10899	5792	12007	7601
465	-53	-144	-110	-41	-279	-143	-68	-114	-135	-160	-122	-19	-143	-235	-32	-49	-90	-144	-159	-133	-106	-33	-76	-160	-39	-359	-75	-117	-613	-280	-530	-132	-99	57	-230	-191	-656	-528	-213	-261	-140	-267	-437	-67	-134	374	-68	-495	-168
466	20	310	33	119	184	53	104	114	77	-33	69	51	215	1189	625	109	1264	115	97	172	772	1081	143	152	1201	909	428	319	476	-18	388	453	137	51	-46	67	550	712	549	214	899	-72	167	60	149	468	52	436	-13
467	-121	-341	-257	-429	-254	-115	-104	-73	-268	-43	-53	7	-418	-535	-100	-66	12	-207	-29	-274	-340	-21	-30	-221	-55	-1245	52	-81	-208	-246	-530	-345	-78	-2	-168	-175	-21	-167	-5	-302	-333	-209	-149	165	-76	-41	-159	-265	130
468	55	-196	-15	-130	114	-15	106	-114	-121	102	73	309	-34	574	-136	35	88	202	46	88	-222	364	162	-9	9	-314	193	158	482	-208	136	-16	222	54	-46	67	-179	33	125	163	-38	44	221	84	168	156	40	369	-168
469	331	1144	-383	-409	1766	107	337	1160	133	-93	29	367	572	1481	534	-89	99	531	311	627	784	437	-124	751	1280	1884	500	380	-38	520	1303	292	48	499	-97	124	1672	1551	1716	1401	909	456	-15	301	1138	626	402	492	295
470	342	273	694	211	1321	308	1207	516	695	72	265	542	354	2159	1266	1200	547	566	912	1258	686	946	741	427	1967	451	1604	643	1167	292	436	1092	342	392	11	494	2339	980	1726	1039	488	449	961	338	1886	990	423	655	632
471	22	224	93	-226	285	-44	-82	211	-122	-26	-88	-112	-85	251	-69	132	0	-51	70	102	-198	-33	42	-257	1	-31	186	153	32	-18	-94	-128	76	165	7	152	391	-117	240	-182	9	-92	526	282	-44	-47	-52	-207	202
472	31	-68	24	-1	101	57	-37	70	24	90	4	-43	0	218	-51	35	63	-49	99	334	118	65	142	-221	-155	317	-13	-5	328	75	404	17	501	25	105	36	-243	410	40	-21	324	128	460	182	241	-118	217	-36	213
473	11	162	-22	71	101	-15	15	137	71	33	21	15	-29	83	72	38	58	46	168	-84	50	17	53	-27	372	73	58	-5	5	68	215	165	581	-15	144	16	42	251	109	89	-135	-8	133	50	74	171	38	27	-41
474	161	-341	35	-145	44	-23	53	228	-109	1	131	88	-106	559	13	95	223	-144	-82	95	-133	626	258	9	-74	-108	189	109	235	-186	-89	-265	191	182	43	87	-52	108	178	-65	-29	261	58	82	91	136	95	167	-206
475	1456	1438	940	446	476	785	1263	1798	1545	327	1266	527	644	2383	853	641	1424	814	528	1759	743	2443	1566	502	1408	969	1863	1643	1293	930	1529	2272	1107	1022	685	827	1545	1123	1539	971	1586	1281	1724	765	1165	2004	661	1206	890
476	-93	-189	-2	-248	-311	-163	153	-50	-75	-26	-151	-1	71	1	-30	0	93	-80	-282	112	-14	283	-88	195	-261	-57	248	56	-27	-41	-52	-302	-175	142	-148	4	-105	-150	101	-157	-116	55	15	-126	-76	-246	131	-86	92
477	86	231	144	-5	381	13	75	385	215	108	75	183	-10	-164	39	73	64	51	-53	130	248	675	610	0	128	327	556	444	915	83	-257	109	156	157	277	208	-116	167	376	2	149	164	-38	32	95	2717	158	593	278
478	26	-67	-155	-353	-146	44	-44	-167	-54	-110	-120	-50	-45	-428	61	-12	98	-153	-41	260	-213	-22	-181	-75	-165	73	-78	-61	-542	-163	-373	-368	-195	39	-144	67	-1079	-779	-42	-239	-285	-57	-45	-215	-86	46	-132	-352	-109
479	-8	73	-168	-325	-127	34	13	-278	-142	-111	-38	-19	21	38	-56	41	-131	242	25	-88	216	-87	64	286	194	-85	13	-137	-356	-30	-152	-47	-136	-127	0	-25	-444	33	-112	-27	67	0	-270	-6	-73	67	-4	11	-89
480	496	140	266	-97	393	704	246	724	251	376	54	281	231	1663	301	115	261	225	399	472	597	378	244	152	271	1379	841	508	274	-75	478	269	-80	866	117	554	899	-33	966	209	764	265	715	626	475	696	399	929	171
481	450	256	168	20	864	173	182	466	224	54	310	249	250	272	273	112	147	239	437	66	399	99	350	352	319	778	206	288	427	250	551	310	334	246	207	122	243	821	330	555	541	141	300	343	228	806	180	551	134
482	399	645	319	209	533	129	377	613	181	223	19	77	388	316	224	-3	158	202	525	366	387	426	96	636	533	454	645	848	246	246	-5	239	-55	417	485	263	1535	938	752	27	865	293	196	191	400	458	162	557	27
483	1176	1275	632	340	934	363	912	1811	926	303	486	706	687	2732	921	553	639	1039	987	1163	722	982	1070	882	909	1922	1417	1063	1463	1044	1907	1575	757	1243	591	365	1100	964	1187	1436	362	647	1250	1212	1022	1764	1140	1338	762
484	382	727	488	312	222	305	583	479	340	213	361	563	498	1017	616	470	410	756	756	719	482	710	449	350	433	842	605	590	1145	691	751	636	198	328	591	404	285	980	592	538	730	389	417	424	599	731	394	823	278
485	197	415	-186	-334	1092	-160	-99	-191	497	404	439	533	63	563	773	293	318	138	340	465	-219	539	-11	77	380	-588	520	158	109	132	-278	132	234	324	133	-191	952	3160	533	1126	-1030	94	42	154	376	4	150	170	-924
486	266	-72	1160	437	63	256	199	-110	455	256	211	1186	111	563	212	480	903	470	11	179	340	775	277	122	242	216	297	260	-43	18	115	20	133	203	281	635	-434	-142	402	171	203	295	-67	240	202	304	150	249	30
487	13	83	62	61	-12	-2	-77	-137	0	-40	-45	-65	18	133	22	58	22	66	113	-141	127	32	-43	-134	-100	146	-36	25	246	-296	168	77	166	61	-23	27	105	-67	-26	-24	96	-100	29	40	-24	23	-40	-72	206
488	120	303	268	-205	648	15	113	-117	274	-83	47	643	226	1405	438	253	354	311	708	341	263	596	258	-11	1008	336	821	181	186	60	289	362	283	255	58	9	1238	503	456	231	372	152	158	172	406	814	119	545	58
489	119	273	51	39	298	57	95	204	300	4	38	281	13	963	227	116	186	202	237	-35	112	337	158	124	779	181	353	28	65	18	68	425	221	145	7	48	211	192	200	141	-62	-98	54	154	-44	471	73	-41	-96
490	36	206	-153	-99	-495	-72	15	-278	-65	-46	-2	85	-146	266	-40	87	2	-92	68	-648	-177	154	21	-288	258	-578	330	-43	-476	-413	-162	-40	-66	54	62	-67	-772	-427	-98	152	-285	-53	216	-79	65	250	14	-47	-79
491	-34	-21	-219	-158	228	-91	-139	-258	-163	31	-33	53	-55	-240	-8	13	-78	-20	-62	-126	-88	-42	71	25	-41	-397	-58	-45	-21	18	-341	-45	-1	-6	-144	-32	423	243	-56	-48	-178	-113	180	-10	-63	8	-146	-176	41
492	497	422	556	502	146	137	495	-6	-101	121	124	561	226	1800	433	326	707	418	369	817	298	1194	483	245	592	626	949	853	2099	208	1056	867	153	443	516	258	1016	-8	1056	274	-9	392	1589	248	812	545	355	1024	206
493	178	321	70	59	158	76	57	-265	387	58	33	420	47	637	298	258	333	202	229	133	159	607	107	140	425	-130	294	-68	-213	30	462	392	-124	299	7	90	455	58	189	138	-503	374	-88	89	48	398	110	184	-498
494	-131	-194	-232	-218	-590	-179	-492	-687	-124	-126	-265	120	-141	87	-105	-141	-141	34	-651	-52	-491	52	-314	-187	25	-1141	-144	7	-537	-163	-1844	-193	-95	-252	11	-46	-1079	570	-589	-193	-425	-47	-216	-343	-204	-138	-120	-1738	195
495	54	263	-4	-117	171	34	-4	204	48	95	56	71	26	21	107	49	81	115	270	-116	-29	73	99	83	307	324	39	117	285	34	126	179	129	51	82	-11	-370	276	64	97	-203	27	437	69	106	162	67	296	44
496	222	368	219	381	285	185	150	295	154	145	180	149	330	604	203	176	277	196	246	211	136	414	181	326	376	209	451	357	701	60	257	510	834	165	172	318	624	150	194	302	338	128	433	91	234	243	191	316	271
497	133	667	24	16	482	159	4	161	498	47	140	299	77	1202	616	169	202	187	764	74	156	503	231	65	1402	133	376	150	65	60	294	482	403	70	258	164	169	570	290	489	106	-17	408	79	258	927	123	313	75
498	306	231	93	-128	63	253	17	110	127	-9	86	150	151	268	364	93	310	103	440	-28	156	415	101	-328	500	680	222	79	32	-7	36	554	256	190	144	145	285	695	8	386	178	34	196	82	110	516	110	142	130
499	392	541	445	-95	-635	-20	64	248	243	186	147	166	250	660	351	173	327	14	355	631	224	552	625	-116	466	883	265	595	1112	-231	204	306	173	143	97	214	698	-352	552	-65	638	497	745	208	434	139	431	257	216
500	81	481	-51	13	44	-59	108	-241	264	180	40	321	165	469	388	56	244	361	369	119	239	236	38	255	821	19	455	191	-16	-68	425	672	-29	-145	-74	-27	-571	-201	-34	0	-372	98	239	-89	132	536	-67	-16	24
501	98	-792	-70	185	1004	47	233	-593	-309	20	25	-171	255	-709	60	130	-162	-46	-236	849	275	22	-32	357	64	187	91	-94	197	888	-651	-305	-623	-50	230	173	2170	1333	200	775	928	655	553	74	-22	-507	125	615	34
502	35	-67	48	-115	-114	13	55	248	-297	-75	247	-21	-10	-36	-57	64	3	-219	-187	133	68	-113	-120	359	19	324	3	214	147	201	-278	-50	-58	34	-101	171	-328	-1182	69	-19	29	-74	196	125	44	-201	128	-296	175
503	304	452	312	542	-648	329	308	46	627	256	195	296	261	93	441	235	570	675	221	1163	222	355	651	219	-72	731	435	748	816	554	1938	435	194	35	387	233	1725	1525	194	819	1064	19	465	651	473	726	337	1522	-288
504	1495	2108	1408	1033	1791	2002	1278	2982	1771	1146	1240	2313	700	7293	1434	987	2008	571	1018	1791	3102	3978	1929	709	1555	5031	1840	1699	1764	865	1734	2204	1129	1719	411	836	1450	4544	1868	1221	2012	773	614	1322	1204	3899	1717	1937	841
505	665	-98	1064	566	578	593	534	999	-292	-53	199	473	399	1461	35	275	53	-184	1023	951	550	557	846	585	151	947	258	677	1803	2255	388	16	749	118	1154	746	-3144	-1265	896	-3162	1910	854	957	1322	524	469	350	2049	694
506	643	1622	2651	1364	1372	471	4206	1912	1827	631	1431	1556	2890	2421	1675	1329	2212	854	2759	1487	864	7358	2832	1099	2903	775	3172	1354	2619	1040	1240	2101	1392	983	1264	529	2932	553	1780	1352	730	2738	2334	892	1200	2129	820	1259	903
507	133	437	379	304	610	155	361	627	289	104	283	235	109	405	206	184	166	372	339	401	372	172	311	336	342	877	353	337	718	125	572	391	295	307	277	201	709	1156	501	253	444	119	641	336	245	400	310	1187	281
508	167	-72	212	82	654	185	110	224	429	13	236	399	61	682	365	163	229	103	396	84	136	56	170	185	317	425	373	337	224	91	94	190	137	251	-39	182	63	-16	253	266	319	72	-54	184	419	354	99	403	175
509	2407	3136	854	573	934	1180	1749	1637	1872	468	2015	3681	687	3834	2516	900	2675	1273	1661	1981	1847	4791	1379	1230	1932	2860	3392	2021	1167	558	1544	2074	1149	2614	810	1213	825	251	2836	489	1987	1977	1641	1009	1633	4502	1404	1976	467
510	202	573	310	95	413	207	586	130	134	-6	97	573	21	2041	524	144	372	817	355	384	118	961	234	-88	480	44	1378	909	915	72	15	1816	526	182	317	166	486	670	1048	579	174	407	268	59	629	992	44	585	109
511	-156	-509	-110	-188	-552	-205	-210	-1519	-441	-159	-354	-230	-402	-532	-317	-123	-395	-392	-575	-609	-393	-230	-476	-274	-364	-1083	-389	-327	-986	-637	-872	-646	-442	-227	-348	-231	-179	-444	-309	-307	-928	-239	-462	-402	-215	-416	-162	-674	-230
512	172	197	128	158	317	27	130	-140	233	91	153	246	63	234	317	143	144	181	289	148	53	311	87	5	277	298	301	196	526	3	761	241	251	43	82	25	614	134	128	234	212	190	160	11	217	388	7	-5	-68
513	115	249	454	988	38	231	301	711	215	187	199	153	348	440	254	147	265	129	384	715	378	98	535	344	191	432	-16	355	904	516	651	296	229	291	223	593	222	1458	504	48	870	452	952	409	258	67	362	450	381
514	41	162	77	-138	82	-24	68	-107	-45	29	51	15	93	73	-16	103	99	-28	83	35	142	-5	-21	-59	228	-79	-150	0	-49	-49	225	97	143	-11	-54	48	402	92	72	-130	207	44	212	59	-20	121	11	-106	34
515	677	697	1060	-42	-1277	1300	2650	348	1090	430	986	1031	567	3383	910	863	740	421	539	1575	446	2297	820	229	1232	216	1231	1413	-16	394	635	324	430	500	156	621	455	100	2164	582	1344	854	1526	628	1457	1068	534	299	467
516	27	3	-2	183	254	62	119	144	-9	76	55	258	69	-136	365	53	70	86	48	130	1651	-57	108	174	141	314	229	459	16	307	373	-126	-55	531	7	32	211	352	114	133	198	57	40	115	112	123	122	114	120
517	1014	967	880	-41	2281	793	1438	1241	2098	337	393	2735	436	5911	1871	556	1838	609	1237	2355	1394	2552	976	802	2267	3572	2452	1418	1485	205	1418	1818	733	862	242	661	1715	1601	2060	813	2181	574	1239	516	2176	3374	876	1979	374
518	500	1651	368	190	978	340	492	1073	2696	182	750	747	431	1809	1927	610	606	1733	3740	733	757	1021	2037	355	2820	839	916	702	663	216	893	2649	1376	310	457	240	995	645	376	663	232	329	620	467	528	3008	491	867	714
519	261	124	261	157	196	68	19	107	148	82	11	512	-15	669	262	16	106	63	153	211	1145	150	143	17	319	1986	222	99	-142	18	231	180	122	110	-54	635	10	-352	232	-212	203	117	257	208	288	459	89	579	175
520	623	908	696	-454	489	478	452	-33	875	203	262	1016	583	1835	789	756	1087	837	860	306	538	738	221	326	1792	1856	1303	214	87	-113	782	1008	536	363	246	441	127	259	725	318	798	1015	555	181	672	1289	141	823	116
521	120	132	113	164	362	-11	44	154	208	160	145	234	186	241	214	93	130	259	311	148	251	154	172	185	356	225	216	286	-32	227	47	291	123	183	137	90	-550	159	-13	100	67	25	320	135	181	402	170	403	37
522	1042	896	900	805	552	405	503	483	762	232	257	978	820	1041	728	683	648	883	927	722	935	920	396	650	1873	111	1028	592	208	-182	73	892	560	513	371	848	-921	762	902	-136	1383	546	456	496	625	1310	279	1469	137
523	-41	-184	-59	-297	196	-4	97	-110	-112	-58	-39	27	-175	-415	-68	26	3	43	-116	-45	23	-101	24	-100	-19	-54	88	35	-87	-755	-141	-241	-378	-41	58	-9	222	-352	18	797	-270	83	-334	-55	-93	-71	-59	120	-41
524	-21	107	-70	57	133	-18	-39	40	36	46	29	37	71	-5	20	-1	40	144	67	-21	106	16	5	21	202	162	13	-33	21	280	36	144	32	-49	3	-20	63	503	-64	-8	-19	87	79	-74	43	172	7	55	79
525	-153	-392	-423	-280	-1372	-288	-219	-546	-539	-135	-452	58	-277	-645	-259	33	-574	-456	-608	-691	97	-239	39	-820	-43	-1347	-271	-189	-734	-1169	-2443	-681	-735	-19	-105	-134	-2043	-1727	-197	-751	-1102	-188	-474	-367	-164	-431	-374	-582	-240
526	154	881	341	207	1131	197	273	815	494	224	343	333	540	5	485	141	371	600	459	564	509	404	729	298	1028	880	347	406	1041	299	1534	590	383	223	364	346	889	1056	234	857	943	492	751	274	369	716	291	1206	436
527	817	1480	581	-65	1061	527	439	1083	770	218	575	259	524	1434	520	404	460	1143	335	839	1284	1434	8	1058	1071	-645	353	97	-104	193	1024	921	256	384	148	878	1164	-402	354	370	-280	424	331	866	447	1157	440	699	-144
528	428	1178	1235	228	311	488	697	1697	376	109	725	768	388	586	184	564	99	430	326	1456	1506	885	1114	624	653	1163	1182	590	1474	30	1019	324	421	782	403	307	444	293	677	609	1480	424	388	958	715	817	625	1634	484
529	167	341	277	33	927	146	57	328	450	103	241	260	255	90	477	35	139	92	649	98	349	282	129	197	258	737	271	252	263	125	425	268	75	99	289	55	444	687	322	263	270	201	246	235	69	699	117	604	164
530	75	491	119	-5	-31	47	128	20	162	65	121	149	106	484	51	141	108	109	193	257	5	69	111	142	88	855	88	91	268	87	409	274	93	47	-11	286	1524	410	112	296	58	85	137	128	103	93	102	251	130
531	480	1820	599	1411	1709	1091	2277	3052	1143	530	665	1359	1598	9302	2089	818	2024	1967	1957	5210	7705	1617	1452	1081	2097	6328	5936	4290	6094	694	5774	2276	800	1583	551	1569	13751	10186	3496	1249	4164	940	3246	1720	3663	1580	1568	6458	756
532	3318	9577	3662	1637	6335	2116	1991	2284	3397	1702	3158	4958	1883	9366	3030	1889	2200	3232	6693	2608	2770	9544	3151	1500	7724	4205	7550	3370	2389	1636	2995	5319	2124	3017	4493	1493	4298	4971	3760	3831	1301	2789	2736	1610	2534	10251	1907	2687	1037
533	213	333	232	239	203	146	310	191	313	-1	246	269	242	972	254	72	153	77	394	416	316	507	261	156	395	648	779	229	537	239	320	272	227	82	82	173	317	251	301	291	406	160	279	194	149	701	138	573	134
534	568	688	547	117	527	131	384	627	147	232	337	767	479	1829	444	166	539	577	965	884	867	1387	649	-85	1158	1020	1489	1040	1046	167	641	541	316	408	348	448	709	1207	1000	380	444	484	577	545	415	813	523	1007	130
535	160	422	113	48	171	98	106	93	375	46	93	243	117	988	238	133	476	254	817	236	452	324	122	69	506	775	484	217	202	151	1287	512	424	137	0	175	868	268	165	255	48	38	521	176	58	497	85	506	113
536	2417	1408	1368	396	6792	2153	2566	3002	1619	280	1954	1932	3391	5128	2878	1300	3315	1958	2277	3723	3019	4829	3885	1797	1849	3515	2534	3659	3814	1951	4855	3645	2043	4059	1585	1333	4276	3898	2377	4656	1683	1292	2435	2195	2967	5583	2790	4622	721
537	119	395	239	244	355	62	62	23	232	62	109	312	138	34	347	78	378	176	441	-3	207	439	88	-67	456	632	599	148	-180	-3	63	267	56	260	113	92	1439	746	402	285	353	64	338	77	149	491	44	523	116
538	633	283	681	205	610	571	392	560	827	229	726	569	439	1743	399	326	581	612	760	380	278	1177	724	371	519	254	500	564	263	360	220	435	131	239	97	214	804	469	402	198	-48	280	302	84	464	843	374	363	171
539	316	1082	388	-28	413	107	210	134	379	171	18	1124	79	3230	532	176	979	381	1141	384	165	3151	160	106	502	495	1381	309	312	34	315	918	316	291	301	136	762	435	389	89	43	167	60	220	290	1220	132	341	-30
540	127	179	42	97	0	220	-44	-97	583	-40	94	300	-55	112	161	132	67	86	1485	-38	133	166	412	31	326	76	160	94	383	53	168	57	276	81	125	136	-21	-159	248	68	183	593	124	126	56	465	97	167	75
541	486	177	798	818	400	350	386	1362	714	355	450	905	674	878	891	418	1068	632	225	1903	2714	502	632	723	482	3299	1385	981	1452	926	1429	-5	320	620	3628	827	614	1047	741	163	904	1028	1243	705	1200	1484	734	993	797
542	487	1116	652	528	1169	568	579	932	1832	187	702	971	199	1373	1343	340	517	849	1462	877	432	814	757	783	1538	638	841	485	948	1010	1418	1948	817	913	489	321	1450	1165	512	1083	744	625	796	997	852	1528	570	862	522
543	1335	4845	3935	495	2579	3794	2748	2841	6315	866	2431	2277	1563	8110	5355	1749	913	3174	4194	2855	2184	7428	4429	1261	4825	2374	3559	2573	3305	1480	2853	5503	1931	3142	915	667	3070	2230	3939	4198	3211	2489	3756	1357	3105	4275	1792	2830	2195
544	694	962	1040	736	540	347	668	1781	716	387	625	708	495	1323	748	320	797	722	517	1025	1190	1162	1017	395	906	1592	1051	1101	668	212	1140	608	333	795	262	212	846	503	886	269	836	762	539	738	590	796	655	912	154
545	169	202	137	392	152	136	104	258	388	25	186	250	47	623	170	27	233	228	168	338	281	198	294	102	419	349	176	263	10	34	183	258	217	218	54	180	614	-125	205	133	266	107	-38	103	93	356	205	422	89
546	68	-72	44	235	-317	78	11	33	88	51	-15	11	-31	300	20	-30	1	-5	151	59	118	245	-56	-55	279	3	78	61	-27	-303	36	-5	-32	61	-19	32	-317	-150	173	171	280	-23	-33	-71	50	187	-35	-123	-6
547	530	435	328	246	1035	287	430	929	407	-46	514	360	471	1980	536	186	495	233	389	687	1136	397	409	221	413	858	903	603	454	155	777	264	170	326	129	316	952	1836	240	375	430	259	451	74	588	1924	241	702	202
548	-298	-876	-807	-349	-4022	-155	-377	-1348	-561	-105	-698	-291	-279	-457	-445	-226	-729	-184	-601	-1008	-355	-371	-889	-233	-417	-1503	-638	-820	-1649	-1689	-1455	-875	-698	-363	-305	-244	-656	-1173	-448	-258	-1804	-233	-1033	-870	-410	-657	-583	-1612	-230
549	2126	12767	998	1413	514	246	5258	7688	8559	29	3344	246	122	16873	12115	4035	12994	34820	14154	7097	10150	6520	2772	4376	15638	645	24705	14852	14179	5008	18459	14184	6531	5208	2223	115	33612	20825	5527	13927	9746	6717	4849	4576	992	12903	4074	14835	2543
550	277	315	148	228	444	65	297	218	428	72	198	731	221	2196	637	213	493	762	471	387	1018	1401	427	431	2404	966	916	329	279	379	919	931	235	507	19	124	688	838	472	566	594	284	191	160	503	1101	349	576	161
551	-24	-132	2	14	-57	-10	53	-73	-89	-94	-19	-58	-114	-165	-28	-23	-8	-83	-194	-186	-65	-103	-152	268	-35	553	-49	-76	-328	-151	31	-81	82	-59	-66	-48	-455	-159	-165	-193	-62	0	33	-169	-129	-88	-92	-187	-89
552	642	4822	5511	1968	2846	6597	6901	5548	1766	649	4456	435	2642	8903	2410	3367	3330	5635	2589	9406	4555	4052	6063	4384	15041	8912	5792	10357	9920	3869	5601	4340	2099	4257	2693	1654	6828	11041	8401	5505	9426	4090	8409	3704	5855	4904	4322	6570	3082
553	497	3499	1841	1914	2300	1374	4359	5726	394	503	770	1772	1699	16506	1544	2466	3285	6735	4406	4741	515	7688	1634	885	27619	7142	7891	4855	3929	1317	3305	5095	1447	1388	540	774	5229	3655	3496	2291	8624	1892	6987	1723	3128	2684	719	5252	941
554	338	514	259	338	355	758	126	627	1248	89	379	825	218	1780	721	352	415	921	1019	493	482	697	428	330	1439	518	605	347	372	375	956	1072	674	303	58	256	42	1551	376	449	425	229	293	391	288	758	219	901	261
555	2206	4269	1992	3349	2122	1368	2157	3032	4024	519	2894	4806	871	12272	5602	3524	4404	3417	4790	4368	6192	5787	1925	996	3882	5362	6293	3501	8462	991	5890	5676	2746	2603	461	3076	9093	4250	8783	4144	7487	3231	6736	2263	4926	9413	3077	9241	3168
556	1436	2360	1488	1153	3450	1397	1591	2022	2457	416	1449	2172	1086	5404	1782	1161	1781	2354	1952	2245	1779	2269	1944	1222	3945	2361	3048	2190	1973	1222	2233	2590	1484	1434	591	1248	2540	3060	2276	2231	1857	1060	1751	1339	1502	2782	1559	3317	1010
557	37	127	-108	22	311	114	46	-63	266	67	-22	3	93	493	100	44	72	86	213	451	103	68	238	219	116	9	193	89	438	189	310	149	-9	62	-23	-18	-201	-100	210	-16	53	-147	309	94	219	176	89	372	-10
558	5	-28	-70	-44	-12	-53	0	-77	37	-9	-6	9	135	-57	-35	-9	-16	-63	18	17	20	-126	7	-25	27	6	-3	30	109	-34	36	-59	-197	5	23	18	105	410	34	138	188	-104	121	133	-63	-19	1	-61	-85
559	390	211	128	-114	362	226	279	16	281	125	109	591	138	1020	379	238	305	147	444	327	408	916	227	79	825	206	654	268	476	102	99	222	161	416	133	124	359	293	483	310	53	308	88	230	419	1031	131	461	3
560	7	-87	-4	-119	-57	-59	2	10	-9	-37	-60	1	-2	-70	20	29	47	-25	43	28	82	-72	-24	-23	25	-263	88	76	-147	37	-31	-4	-41	47	23	-23	116	-578	40	2	96	160	4	76	-18	46	41	47	-37
561	32	23	-6	42	57	-8	57	-107	77	-5	10	52	34	-13	67	-35	-2	37	50	109	-62	53	-52	-15	11	104	-9	74	263	-41	141	-28	-24	97	-109	34	-127	117	2	-46	82	-19	-13	-6	16	-8	19	97	20
562	82	5	301	37	-559	62	42	90	139	33	230	207	-111	118	48	226	110	-63	-854	-38	62	216	94	15	-80	-3	-140	201	-43	-83	-310	-22	116	155	-191	113	-645	-461	184	-489	0	169	-56	18	-84	131	107	55	305
563	6384	7187	12732	6003	6189	5350	10413	13448	8256	5506	8960	12028	7677	14134	9669	4953	12220	3246	5653	13904	10855	10824	9274	5628	8739	16388	9708	11223	12496	7347	7876	7272	7767	9070	4446	8188	3811	7394	13335	5322	19443	9187	11317	9665	13307	12869	7189	14451	6237
564	49	455	-8	269	235	127	68	110	191	40	121	127	90	351	145	16	181	202	313	380	82	112	124	13	145	600	258	250	246	231	194	150	114	133	-3	46	307	83	-42	133	295	164	83	86	118	285	14	358	54
565	112	-145	-44	-185	6	82	-53	-167	29	37	-66	49	-2	272	-2	49	50	0	41	-200	-82	-40	-11	15	129	-336	58	20	109	-159	-378	-12	112	55	-82	60	-243	16	-216	-2	-343	-4	-309	-289	28	250	35	-349	-72
566	356	-407	110	9	438	342	113	577	358	228	318	554	122	517	483	330	492	187	518	88	71	769	108	286	376	85	261	396	-87	159	0	1029	395	89	23	127	518	192	277	242	-348	154	33	162	121	716	149	307	206
567	4247	796	210	164	1270	2350	446	543	618	250	1028	1626	370	1205	488	138	1025	2160	870	560	328	2144	1153	2027	1443	667	1797	1247	482	858	861	5912	891	3475	364	-43	1693	427	645	206	541	1013	447	2410	387	1916	3268	271	2041
568	2429	32940	2877	3609	1563	2385	3562	1952	17446	7341	6420	14699	2858	15626	17456	5313	11839	8769	14955	1914	1722	14803	5107	2418	9215	7103	2815	1791	1496	2175	3000	17769	14762	3115	12275	2327	1577	2565	2022	7203	952	4478	2275	3181	3098	13906	2368	1360	1628
569	37	420	-6	127	781	224	173	114	395	16	35	119	39	1421	488	236	40	496	474	468	452	560	323	132	1827	155	1054	183	1151	159	993	526	76	66	58	55	772	276	848	307	319	274	295	16	1056	840	44	526	65
570	-391	134	-902	-953	120	-5	-130	-1137	-951	-144	-927	-260	-127	213	449	-12	-18	-595	49	84	-20	761	-643	-134	-29	-1242	-206	-163	-356	-1553	-767	-1738	-606	-396	665	-196	-2678	-2213	-146	70	-628	137	-706	-943	-108	-575	-641	-968	-161
571	1101	1408	1453	646	1150	749	1356	1200	1825	627	741	1621	1201	6558	1953	1469	1910	1386	2816	2612	1634	3523	1728	395	5546	2380	1922	1632	1775	584	2170	2600	1430	742	352	751	3599	2213	1772	1529	1460	979	2016	558	2189	3247	613	1954	415
572	139	-154	82	-237	-349	234	346	134	-87	-98	119	-186	279	-230	-290	61	34	-153	-122	-303	-162	234	44	-79	-336	-448	-108	240	197	-512	-872	-293	-210	53	-317	-2	-1471	-804	48	-699	-411	192	-72	-16	204	-360	-40	-618	-615
573	263	13	315	22	101	89	239	-100	249	116	223	103	181	315	82	138	41	17	192	405	14	498	177	116	460	-54	170	-12	-43	121	-68	106	29	119	101	30	719	-150	202	263	-232	47	2	82	-18	218	-41	-201	202
574	-20	207	13	153	165	69	22	-281	-40	47	113	68	66	-72	170	24	-23	95	-72	225	227	10	48	-59	287	-66	45	293	65	235	451	-64	12	61	0	-69	222	1945	120	165	207	-145	-13	10	43	124	-32	67	-164
575	64	479	55	231	2459	57	139	677	468	-17	21	283	-66	1445	649	47	206	410	509	-105	482	683	318	79	1447	1052	337	436	175	337	294	607	615	247	203	-92	42	461	69	394	140	-242	121	5	22	913	108	-61	168
576	413	1017	536	497	692	350	563	674	575	224	462	937	687	1641	656	275	735	667	980	1008	568	1193	766	367	1081	1706	1051	618	937	444	956	764	336	477	371	321	1185	863	637	478	802	505	1255	414	678	890	401	1024	556
577	200	595	348	84	902	189	326	691	426	87	362	370	423	1043	461	284	435	569	692	824	432	887	468	205	1073	530	730	536	712	341	709	571	158	118	234	203	1333	268	320	315	275	355	713	165	539	705	231	845	268
578	408	254	186	-65	336	156	190	167	292	101	59	305	119	878	161	69	378	184	296	253	201	519	145	-1	661	492	415	217	559	231	378	119	130	134	7	244	973	679	216	190	246	254	361	108	226	552	155	69	178
579	522	402	173	222	2440	47	175	509	133	44	74	291	540	1051	209	40	295	300	334	426	399	231	130	377	218	1106	445	296	460	193	756	1137	789	495	23	41	709	972	210	117	459	167	345	423	241	347	571	848	61
580	163	189	161	-29	540	271	-4	308	139	101	47	156	114	166	138	50	167	323	392	112	186	92	12	-183	285	543	242	176	202	167	478	313	380	153	-15	117	-63	410	37	146	-43	190	79	-28	153	289	153	543	113
581	535	1366	290	-18	552	590	288	469	751	149	420	848	197	1770	711	366	819	595	1145	712	506	2715	282	300	972	543	1830	723	548	102	1329	781	414	512	532	420	1079	897	787	457	425	437	577	291	683	1872	329	895	243
582	136	90	48	35	406	33	77	73	455	20	206	179	-42	324	151	96	0	75	379	229	79	607	87	-83	37	165	176	130	-21	-18	-73	436	-58	117	90	113	243	16	136	73	207	12	9	-35	58	410	-32	-106	44
583	-46	204	-86	-198	6	-81	159	-244	-283	-96	-190	68	-154	923	285	-4	64	-439	-144	70	630	2747	-478	-57	409	-416	258	81	306	-277	-168	-241	-137	-178	90	-87	52	92	157	-185	183	349	-106	-531	-88	41	-226	-607	-175
584	470	779	226	527	902	445	346	1110	641	207	1357	458	578	1010	524	444	406	644	1066	1286	1370	216	1203	684	1150	1423	821	549	1627	907	1917	991	896	415	336	550	857	729	691	427	246	621	548	556	633	1276	635	1548	542
585	125	192	126	-125	12	184	91	110	227	-3	141	315	98	248	170	96	26	155	330	3	168	478	46	-27	626	120	209	43	60	106	-152	41	-116	115	219	34	381	360	165	0	193	214	178	71	24	303	-1	128	-3
586	827	2469	1781	792	7714	751	1134	3331	1766	565	1392	1344	2424	2691	1419	515	1453	1539	2190	3236	2305	1106	1929	1934	2062	3235	1627	1990	3869	2787	3126	1493	1680	709	1698	1432	11803	3999	2666	5986	1987	1737	2946	1276	1219	2618	1591	3684	924
587	128	568	197	26	95	149	204	244	348	76	165	335	178	908	409	127	407	187	670	-148	269	1202	198	35	1047	626	625	189	460	91	472	485	124	181	140	104	772	176	330	-46	198	72	99	145	144	672	77	473	130
588	182	1500	1249	566	432	339	1751	1117	1462	126	2088	1802	825	2426	2018	1173	1604	733	3486	1353	1450	799	1794	1087	4272	1884	4489	1911	1847	1887	1334	3108	2348	1054	614	607	5409	1148	1046	2353	1035	1697	889	639	4418	3856	996	2374	536
589	304	502	401	117	851	185	71	258	543	52	227	1128	213	1028	617	123	372	66	552	197	266	950	181	340	214	355	415	293	230	-34	194	402	300	389	285	140	317	16	210	261	-33	115	216	331	211	982	279	302	30
590	63	365	93	46	324	374	102	97	480	75	172	564	266	524	265	178	233	262	623	-21	266	611	256	470	250	-130	324	1004	186	98	-420	328	286	536	133	16	105	-41	186	152	-188	173	117	113	-58	796	222	173	237
591	116	273	244	121	69	169	237	617	156	73	164	499	-119	632	148	372	174	491	361	546	266	230	341	108	551	76	707	76	575	-303	809	272	309	295	121	228	232	1140	242	337	677	381	74	208	273	392	138	397	199
592	134	402	226	82	247	81	86	271	337	5	162	437	122	609	375	112	234	465	744	274	290	681	158	393	354	117	301	206	263	94	394	413	306	118	140	57	603	-83	378	247	178	29	232	269	192	434	146	302	72
593	126	368	37	-3	12	-4	-4	-184	215	51	-177	340	-183	407	226	169	-22	447	416	-148	-127	438	-115	-5	437	-343	383	66	-120	-326	-283	158	202	79	62	50	-391	25	117	193	-164	79	-288	-179	119	302	-44	-181	-92
594	97	83	77	57	311	129	199	181	283	11	-4	69	5	639	258	130	82	80	43	59	272	348	76	221	179	44	265	109	279	26	-236	311	124	266	-39	20	285	352	128	111	111	77	-24	369	58	144	602	47	-72
595	-80	-63	-141	-263	-146	-156	-86	-369	-129	-69	-108	-66	-58	-220	-71	-76	-189	-170	-208	0	-53	-18	-209	-255	-19	-540	-173	-143	-263	-334	-520	-108	-80	-66	23	-92	-359	-125	-5	-285	-154	-104	-144	-206	-142	22	-58	-288	-51
596	383	1096	339	166	641	469	290	593	308	108	326	1068	234	1093	998	493	421	517	912	698	518	1326	350	397	1483	807	1371	682	827	140	441	615	546	624	657	339	2254	1165	1166	884	643	670	605	237	966	1763	553	559	134
597	94	53	11	84	-69	-39	-102	483	4	19	-85	244	-66	460	51	-40	152	121	-40	190	227	217	83	7	124	28	0	166	-49	-402	15	-75	-95	86	164	-34	222	-150	98	-2	-19	173	-83	-79	123	62	-92	-176	-127
598	331	181	297	396	3170	176	153	409	218	40	237	627	301	742	315	180	170	519	201	687	281	341	286	405	484	505	419	306	822	349	614	133	207	171	-50	314	1280	1819	475	663	285	19	273	133	254	389	205	557	192
599	191	355	219	91	298	178	153	530	352	30	173	223	-45	371	301	92	464	257	526	673	349	142	320	211	484	543	101	153	739	577	1145	258	281	276	180	177	-137	343	352	470	662	27	221	88	125	311	182	389	161
600	16	67	195	-72	177	89	64	137	-29	76	-47	1	130	-153	25	56	-69	-11	53	155	216	-55	104	166	141	286	19	51	274	729	199	-91	61	103	90	-2	857	796	245	688	270	72	88	89	198	57	85	291	37
601	14	333	501	233	1550	-46	266	758	346	431	79	447	503	2423	517	70	1166	470	79	539	997	2663	119	656	561	622	497	388	334	151	152	482	188	783	74	630	423	1777	496	337	62	68	-60	446	1582	473	632	1553	82
602	9	303	119	-48	-177	-1	-39	-90	102	30	47	55	-2	177	117	35	89	193	272	3	-91	91	-65	13	214	-57	219	22	153	-41	246	185	43	19	109	-115	317	-16	2	100	154	190	22	-40	-24	79	-70	-61	134
603	376	2123	991	181	400	1973	1329	563	1564	108	1266	344	237	2232	561	683	710	531	1136	765	74	1291	1734	205	3088	355	825	687	460	2084	688	1882	1301	399	528	-18	592	1173	1030	1853	290	700	1029	174	582	1772	168	198	329
604	92	440	330	31	2052	1242	1076	1596	1748	278	832	53	1033	3044	2320	900	51	1045	374	2376	870	143	1039	3884	2172	181	1650	927	1677	1401	2280	1277	323	2097	387	575	1524	352	1713	1790	759	1489	1541	1850	1640	1101	2647	1187	1257
605	1606	608	800	332	1137	2338	226	46	1506	1080	1144	529	-82	284	827	1143	468	519	842	151	923	1257	1135	1127	1520	826	373	260	-147	1613	325	1420	474	572	614	873	222	92	176	625	-290	47	13	243	-48	1576	631	-97	460
606	332	445	337	35	184	202	219	328	652	204	125	854	37	2932	578	133	1195	311	516	225	263	844	299	322	1869	807	658	189	361	-56	604	772	322	389	109	390	762	536	389	152	623	111	349	257	522	1291	85	397	-10
607	911	1833	1508	1517	438	1026	1041	1888	1087	483	922	2186	370	4626	1943	1375	898	1250	1900	1889	1746	1211	1365	2377	4449	1544	3755	1824	2998	1617	3688	1269	1637	2190	352	1234	3345	4820	2324	789	1915	1026	2379	3104	2023	3602	1755	3566	945
608	403	910	159	246	336	200	253	278	1018	176	184	367	250	2274	431	232	311	199	1154	380	663	1834	267	88	876	546	1096	413	454	246	420	849	641	203	340	143	836	813	669	582	532	269	343	196	408	1167	134	613	195
609	-423	-1381	-390	-775	-1506	-524	-601	-2656	-913	-458	-718	-563	-1036	-1309	-624	-216	-1010	-1366	-1102	-1547	-1018	-572	-1195	-1065	-951	-2221	-864	-904	-2159	-1104	-2974	-1665	-1011	-644	-626	-568	-2826	-3705	-736	-1064	-1349	-647	-1067	-848	-650	-1186	-788	-2612	-233
610	176	425	281	291	610	233	281	3	319	138	260	316	210	963	273	283	287	138	590	423	506	482	381	274	691	800	766	439	690	391	604	574	218	344	207	150	1439	335	317	413	280	190	625	274	481	716	371	775	151
611	115	243	93	229	254	213	124	90	120	61	86	195	117	295	223	73	143	153	168	179	748	447	139	69	384	692	356	319	317	-22	204	133	70	175	-46	-4	-31	637	173	146	-43	12	144	318	125	295	222	358	0
612	88	1684	113	1295	190	113	852	103	912	249	450	545	394	2114	940	-13	773	1516	1116	2425	2039	979	1328	654	1632	937	651	615	2767	2228	3967	1687	1002	312	618	499	1058	1945	1310	1883	769	368	1311	472	852	1405	511	1466	1013
613	12	174	-37	-89	216	71	-77	-218	133	24	-7	71	45	99	99	0	-16	141	188	165	180	-20	-7	90	181	149	314	102	-301	-212	220	45	89	114	-15	-69	-127	-16	45	-13	33	77	-291	-74	3	189	52	-89	116
614	-71	-72	-208	-89	-171	-124	-33	-318	-66	-60	-191	-89	-114	-114	-235	-44	-202	-129	-111	-102	-56	-141	-147	-253	-118	-483	-255	38	-27	-231	-394	-193	-195	-43	-31	-92	-719	234	-18	-266	-401	27	-252	-126	-71	-192	-135	-557	17
615	28	-36	-31	-33	209	-42	82	127	64	-110	36	32	151	187	296	53	-23	257	97	296	346	18	165	73	194	174	-72	-22	263	246	730	344	174	192	58	-136	-656	176	112	89	-232	182	264	237	56	33	10	484	37
616	72	18	224	119	260	98	-13	124	87	109	43	346	618	436	60	-10	180	-14	83	250	68	268	33	-102	47	232	386	132	142	288	115	84	51	41	101	164	656	293	88	-24	120	74	27	55	140	83	-38	257	6
617	295	88	210	727	393	36	350	432	121	105	428	306	418	251	291	113	160	187	325	419	722	311	467	61	145	762	245	902	739	531	189	-30	200	334	90	50	550	779	509	78	377	437	417	245	494	364	338	467	601
618	1893	-194	-831	-1168	-209	545	-552	-1449	-114	208	-820	182	-402	-562	-361	-226	-429	-655	-506	-218	-236	1012	-113	-100	-254	-1757	-232	-102	-1792	-1237	-767	-772	-503	-294	352	92	-2667	-125	-440	-522	-2694	-402	-1442	-506	-498	681	11	-867	-463
619	40	87	-39	-358	50	18	28	-63	121	-43	-49	91	-7	-30	106	-4	-23	80	159	-7	14	130	2	-85	-11	-60	94	-25	180	-159	-63	-25	14	-45	-70	53	-74	75	42	2	-43	-49	40	-20	-5	163	-1	-92	30
620	143	430	35	74	406	188	221	10	533	0	167	379	71	1994	534	138	492	401	599	359	275	964	124	110	874	406	435	130	345	201	441	879	339	138	293	36	889	544	362	239	91	190	331	60	395	730	38	473	130
621	178	372	-35	-256	1086	449	48	469	90	115	407	146	-93	1708	1629	386	478	375	408	1075	3928	520	378	-5	1912	3779	1401	695	230	-106	2574	821	134	457	-90	-99	1302	997	632	228	652	-72	607	99	228	2573	52	1716	54
622	326	683	381	-145	552	208	379	516	802	130	287	489	303	1318	566	238	558	696	940	874	429	556	721	130	1585	692	733	365	575	299	614	879	481	409	140	-18	963	1207	517	299	614	244	507	453	629	961	313	587	209
623	1139	2224	1637	1216	7040	1056	1926	3623	1554	615	1343	1669	2738	3589	1266	763	1243	2215	388	7396	2439	1716	2281	1477	2103	2129	2062	2512	6111	1906	5018	1975	1820	1003	704	1120	4202	3378	2175	1668	2345	1553	4339	1630	2738	2664	1668	2942	1402
624	209	-55	403	31	-997	91	6	516	268	55	247	253	450	814	96	64	297	153	-10	416	100	297	328	53	691	1033	320	357	690	-212	320	245	380	204	-258	78	-1259	-243	533	-136	246	-100	-440	279	458	395	208	-167	144
625	83	-117	-6	-24	209	-11	-4	114	82	-46	-24	80	85	338	108	107	-36	-95	321	49	-88	202	21	19	279	-152	114	-17	93	102	57	11	75	19	7	-62	232	276	98	70	24	-53	-42	27	22	121	-35	55	-189
626	828	90	685	-295	-50	216	630	912	178	83	-100	864	279	2650	341	592	231	-54	127	458	325	1516	230	-27	1077	-111	1060	735	734	-269	-698	4	112	646	121	194	486	620	1070	511	-19	591	370	360	1024	315	534	1343	-24
627	531	83	851	622	610	463	883	583	463	253	514	300	1041	911	466	-92	254	571	716	1396	707	599	805	624	748	1201	851	787	1600	459	1166	-40	454	196	681	640	973	-544	883	484	677	529	645	529	865	567	498	366	817
628	277	-124	215	61	-482	175	250	345	43	67	92	162	487	251	213	136	415	-179	21	211	118	162	285	164	114	651	144	194	449	205	304	269	113	10	23	16	-31	-972	64	-334	507	79	-11	84	140	24	238	279	99
629	502	947	636	581	368	472	512	90	1060	280	498	535	546	2170	653	493	674	528	618	1434	843	1190	1246	725	1902	314	903	173	580	193	662	1096	508	302	356	476	931	1064	360	1156	536	878	575	646	812	1476	592	739	336
630	-118	-62	-113	-631	-196	-120	-202	124	-190	-43	-201	-123	-63	-173	-10	-92	-303	-23	-140	169	59	-38	-229	71	-106	-524	-255	-204	16	-91	-336	-91	-380	-146	-113	-6	-624	33	106	-326	-285	-137	-261	-86	-116	-178	-228	-408	-161
631	307	358	279	248	-82	247	39	526	342	22	217	213	127	490	239	121	236	265	313	204	207	325	52	-312	638	556	327	263	230	607	-21	362	441	9	70	159	370	377	189	-78	527	216	115	93	-13	607	199	643	154
632	255	55	113	211	222	146	153	-13	173	34	28	150	53	533	345	138	239	23	184	440	201	234	190	-11	429	467	98	201	274	167	331	162	58	187	-43	381	338	-25	328	29	53	177	49	47	181	436	49	33	-75
633	270	331	113	433	571	-24	421	144	377	123	95	-47	572	167	189	32	117	132	21	1064	189	56	430	328	-5	1058	108	140	268	398	57	86	200	53	183	136	688	1047	170	693	246	203	367	384	39	297	53	582	206
634	-24	-48	-102	-76	108	-120	31	26	-28	-17	-22	21	-71	-38	-4	7	-9	31	-59	-109	-20	-17	93	-13	-19	-3	-98	-91	-32	56	99	3	-31	-14	35	11	-455	184	-2	-5	-19	64	-189	57	18	58	-79	-137	54
635	684	4128	869	751	940	579	1420	1395	1890	272	444	2061	815	6303	2590	806	995	1868	3425	1505	1557	7072	533	490	3947	1423	6093	1975	2230	337	1981	1832	1497	1718	685	820	4213	2800	2340	1319	1407	1011	2214	983	2009	3099	704	1965	474
636	138	383	217	272	63	15	153	402	339	-33	45	216	-109	554	207	83	222	326	174	35	-79	264	143	55	269	-349	68	296	5	-148	36	276	290	159	234	6	-84	117	66	-51	522	175	293	208	181	197	274	442	109
637	595	419	-190	-1190	1010	-274	2	-754	356	136	-642	319	-719	716	281	-309	46	560	445	-1311	-1394	289	102	-893	892	-1951	464	-873	-635	-1329	441	375	-51	175	-422	-529	-741	477	368	-48	48	355	-225	-397	432	356	-831	-89	-1154
638	40	135	-128	-157	209	-59	-48	-355	144	-58	-43	-29	2	19	43	-43	-135	66	1	-155	198	83	-88	-148	39	-438	-104	-227	-131	41	-556	1	-130	-127	27	32	10	-8	-66	280	-328	53	-237	-413	97	20	-89	-361	-292
639	223	-305	-8	-403	127	-173	-110	-415	29	-80	50	103	-383	-133	72	-32	-32	-375	-167	-394	-485	132	-98	-120	17	-419	-307	-270	-202	-7	-824	-338	-150	-155	15	-309	-52	192	-152	92	-454	-70	-336	-250	-155	127	-229	-627	-199
640	560	593	1442	383	502	1128	828	996	677	173	815	1289	671	2263	764	449	704	1250	1338	1054	1003	2876	913	577	1394	597	1371	771	931	1412	1381	1004	543	767	403	494	455	67	797	620	-275	814	997	584	745	1819	519	1047	470
641	238	-102	-206	-385	374	153	48	150	61	17	204	73	31	45	212	58	181	-69	82	282	275	142	92	361	76	410	229	183	164	174	220	-77	-163	288	35	73	296	721	122	111	58	184	101	94	239	330	40	302	0
642	154	700	88	117	285	100	219	436	462	146	188	292	-7	728	396	104	245	280	549	-3	298	451	312	114	563	702	271	531	43	-56	409	333	413	354	199	62	338	922	453	304	-87	344	250	172	425	507	64	1083	106
643	116	75	31	13	177	78	59	164	76	-41	46	52	127	61	47	75	15	170	137	151	230	54	43	45	84	79	130	71	169	113	99	73	24	57	140	50	74	16	138	62	130	237	273	-22	69	66	140	-69	24
644	275	-219	-195	-102	-177	-231	-93	-268	70	33	-231	220	-133	597	219	-27	122	-23	344	-366	-62	209	-102	-344	198	-238	-127	-51	-427	-273	-667	-218	-80	42	101	64	243	-905	112	-277	-203	-42	-108	-382	-312	338	-150	-1019	-20
645	-24	-97	-42	151	-95	-18	-88	201	139	51	47	27	-111	-7	84	-6	11	-199	-67	-133	-112	21	-185	-183	98	-108	150	-114	-65	-34	-257	35	-95	-86	11	101	846	-687	168	-8	-125	124	-320	-42	-59	155	-32	-128	161
646	927	1082	1584	902	768	2224	683	1197	985	6744	519	9273	2022	2611	481	298	1234	557	374	634	1335	856	230	1938	516	2479	1663	1390	964	645	220	87	679	1659	4611	931	307	4426	1684	476	962	704	1097	3577	1918	1215	637	1268	2419
647	186	-51	354	123	-31	345	257	899	45	82	92	360	138	880	152	138	283	-77	-37	394	482	513	334	156	126	594	406	183	-126	254	483	482	107	358	254	203	486	-150	547	209	464	190	442	33	136	313	317	347	268
648	62	806	208	-285	1010	89	51	120	468	138	122	420	42	857	365	161	354	797	731	331	355	605	414	308	707	775	163	51	306	-197	714	466	434	304	324	323	1291	570	467	457	-58	179	-153	32	324	562	328	425	161
649	1049	1118	2258	618	1963	1533	1775	798	1442	423	960	2494	1502	4958	1062	713	2063	1178	789	1847	716	2490	1004	974	2674	3149	1309	996	1879	1226	677	1882	1515	1352	806	815	1355	813	1187	1167	1668	842	909	511	1880	2167	840	1159	608
650	531	640	838	882	857	485	122	-265	694	18	1326	214	1028	212	480	340	420	1146	179	1244	565	296	947	482	273	2539	150	853	1573	1393	2054	742	678	-107	274	695	-476	2079	1459	895	943	-214	-474	612	698	767	264	1567	1116
651	47	-491	350	71	139	123	195	613	-315	-5	113	-23	333	-219	-231	96	-411	-326	-336	800	438	-26	311	142	356	788	-258	176	909	-186	951	-315	-34	67	-31	53	84	461	8	125	362	25	-13	282	310	-143	283	428	109
652	-1	-100	-95	-229	88	-10	2	-218	9	12	-20	2	53	-142	6	32	-2	-222	-6	21	-124	-40	-10	-5	-47	-34	-19	-71	257	-250	78	31	0	93	11	-120	-169	58	-24	-29	43	-44	106	69	-20	0	43	-44	-61
653	22	-51	190	-128	444	42	495	211	235	58	69	205	151	1165	-19	55	-3	222	-67	750	11	355	145	-3	-39	88	458	43	849	280	525	-10	143	-75	101	6	148	494	1075	-48	67	-70	625	-82	432	1001	37	232	65
654	534	906	647	1119	1137	391	581	278	1290	364	812	413	596	1173	559	469	747	1016	1169	567	991	1724	1756	466	2005	1907	2111	1929	1342	698	1634	868	780	897	708	686	1778	1374	998	669	1315	537	483	450	844	1880	686	2334	443
655	99	217	51	257	393	-2	77	-150	146	55	138	171	58	99	112	135	70	161	216	-74	159	88	76	87	194	92	196	40	487	451	78	232	204	208	191	256	0	209	117	29	227	66	31	184	127	189	80	739	-202
656	292	420	155	-63	457	288	182	0	387	71	146	656	-29	772	112	218	165	23	403	246	239	914	78	77	579	905	415	148	93	132	183	191	343	332	254	249	910	503	504	421	488	94	101	113	333	760	-71	425	-6
657	34	149	110	142	127	47	37	-140	4	-20	97	38	5	60	98	69	4	-31	-1	-278	-14	114	85	-31	80	355	114	48	230	-60	162	127	234	167	-78	64	434	142	-128	130	154	87	94	40	112	49	34	254	44
658	187	698	186	106	0	272	-46	-187	194	1505	320	1371	218	781	87	236	256	86	345	-74	50	564	65	365	612	254	317	79	-43	72	-231	20	204	82	172	196	137	1861	10	125	237	-143	-117	316	232	552	-83	229	61
659	137	90	397	278	1150	205	-19	335	67	57	45	340	311	1286	228	12	282	193	153	306	68	998	206	221	395	216	500	204	219	125	252	190	122	143	82	362	190	-167	162	136	217	250	329	128	217	319	262	265	182
660	28	6	88	130	203	97	35	-83	41	-39	19	135	90	310	153	52	113	80	235	-3	11	170	58	154	303	50	232	22	76	-49	183	122	212	135	62	129	296	394	88	81	77	72	155	66	108	353	83	128	44
661	113	460	144	-100	19	94	26	90	414	67	86	249	-5	637	253	92	183	317	206	-10	316	1028	46	57	441	387	373	127	147	87	178	121	-82	134	-93	205	793	385	112	81	-43	64	-18	27	95	352	77	176	168
662	107	628	-26	-33	31	68	-53	184	932	20	26	281	-93	104	227	52	-34	49	461	-14	216	222	284	148	1672	-111	461	229	43	254	-120	318	61	31	250	25	-116	326	-96	40	4	-59	-234	-18	50	1368	-105	111	429
663	230	1153	157	429	673	508	168	620	806	189	460	388	325	709	613	427	373	875	689	514	589	397	403	510	1106	2402	697	388	427	573	798	714	306	544	375	328	1333	1525	277	291	744	169	374	490	249	1306	559	548	274
664	866	487	800	717	1791	566	1174	1881	1775	173	1110	891	700	2587	977	855	811	733	1261	2009	1184	430	1445	1510	2280	1249	1676	1121	1731	1382	1555	1878	1202	1139	399	973	1524	1349	1120	1148	686	1082	2070	956	1607	2110	1114	1654	807
665	56	-45	-2	-214	-158	-36	-91	147	32	-50	51	76	-119	-81	51	-21	-19	0	2	-28	148	50	51	-106	-11	-311	-127	-25	-147	-132	267	-27	-19	11	54	57	-307	-536	-29	32	-246	167	-203	-15	0	37	-17	-156	-48
666	590	799	1118	1293	-146	608	1016	2787	388	391	641	945	1054	2577	642	712	741	1574	477	2549	1483	505	1100	1162	1873	2650	2308	1441	1616	2213	1844	1675	702	909	211	986	846	897	1203	911	1586	816	997	501	723	1033	692	1595	1725
667	310	1149	1071	816	349	317	552	1214	510	200	446	423	74	1272	616	329	653	1036	632	846	1213	806	544	506	1181	1280	795	618	580	478	2023	549	735	427	743	150	561	662	613	631	2104	732	1090	1056	766	1098	470	1984	539
668	121	454	206	291	368	169	173	996	201	98	340	284	564	533	417	260	452	268	471	789	458	158	409	508	431	940	307	403	1085	653	1329	507	202	194	27	251	688	980	405	174	599	115	591	165	376	913	350	1248	213
669	-81	-544	-62	-237	-749	-113	-237	-100	-358	122	-192	-169	-636	-158	-220	115	-213	-219	-423	-356	-467	26	-326	-166	313	-1932	-464	-242	-1200	-356	-1182	-219	-502	-282	50	1338	-190	-402	234	-296	-14	-212	-237	-240	-348	-251	-249	-1215	-237
670	77	154	93	-123	-101	-72	177	161	66	43	-26	104	-39	360	130	29	131	199	258	-77	-5	235	64	-25	124	60	121	63	263	155	10	16	39	89	82	36	158	335	64	114	-91	62	15	10	93	180	35	-41	-120
671	131	3	230	-287	38	205	146	563	-19	147	3	123	239	660	183	61	125	0	10	341	109	369	74	138	129	622	422	424	542	113	877	-49	-80	26	50	242	550	486	413	62	106	25	92	44	166	129	110	279	13
672	300	-251	-130	-31	-203	43	-11	429	286	8	106	588	282	691	51	101	-85	623	523	232	-94	313	-212	181	549	98	242	183	-580	-258	399	326	-9	71	-160	288	1175	-125	125	92	33	83	-320	-275	202	584	105	-405	-185
673	168	350	363	18	0	152	421	426	362	78	39	599	213	1066	416	190	262	652	301	257	233	681	81	160	728	31	1064	258	416	30	57	544	127	279	360	302	1079	394	416	459	396	53	361	201	342	492	110	170	-30
674	239	229	725	3	-25	127	443	774	437	338	-45	801	-39	774	594	321	481	912	633	-200	-245	1161	245	-235	683	422	1358	327	-624	-265	-310	300	559	203	367	71	1757	913	653	666	203	332	478	18	543	814	-192	-69	-199
675	0	73	53	26	-25	162	8	93	-154	66	-30	-53	-66	-172	-53	16	56	-101	-68	0	-115	32	-35	51	-173	3	19	-2	-120	-125	-294	-44	210	-79	109	76	-148	301	-34	108	135	-122	2	101	-108	-75	91	-403	-13
676	64	306	128	-106	-101	27	13	194	67	-73	57	88	55	525	211	-15	177	340	227	119	139	177	299	5	395	470	275	178	43	87	78	184	139	-77	19	-13	-455	326	186	27	14	109	79	159	24	376	49	-89	237
677	468	625	383	177	88	200	195	409	229	69	416	557	407	510	426	375	468	932	683	549	222	718	506	96	941	581	861	840	241	372	693	842	799	302	430	332	412	1333	760	348	667	201	1144	452	708	574	367	593	329
678	413	506	958	93	768	433	990	462	850	160	906	695	1393	1747	617	636	1095	482	1300	423	381	1989	604	290	1284	518	749	720	438	440	341	1017	607	251	344	272	677	855	501	481	62	574	363	416	513	881	337	543	271
679	398	784	408	274	762	247	506	774	659	151	400	519	69	1116	455	233	469	1166	704	613	704	608	455	253	1473	1411	841	812	1068	311	714	675	380	292	305	131	1153	645	611	321	914	447	702	374	578	772	362	1310	302
680	13	40	26	24	88	-23	84	46	-17	-30	-24	34	-21	137	8	15	64	8	43	31	-35	95	5	25	208	123	127	199	-27	94	78	0	87	74	-11	25	158	385	90	54	-19	47	-121	-5	39	22	53	78	-48
681	56	144	46	82	260	111	179	23	19	2	102	163	173	834	331	84	333	196	253	468	180	308	102	120	634	375	451	143	383	125	283	295	166	31	191	129	518	586	82	223	411	0	218	55	159	306	53	235	65
682	384	735	297	239	25	218	266	191	164	11	459	316	90	629	162	335	381	288	738	363	482	566	336	63	937	1039	487	534	224	216	-246	374	147	163	407	226	-10	217	485	318	483	254	300	93	230	436	141	389	96
683	1369	424	860	878	2675	1457	1782	1697	712	359	490	386	479	767	235	329	295	543	736	708	405	752	1703	745	1351	1128	694	1310	1605	1108	725	867	451	380	575	385	1535	1659	744	1390	851	700	839	817	704	1785	358	1075	278
684	-126	-209	-64	59	-216	-78	-51	-120	-165	-146	-95	-93	-47	-297	-73	10	-57	-106	-82	70	-133	-34	-60	-128	37	-209	-127	15	-306	-474	-352	-109	-49	-55	46	-115	-148	-159	-194	-108	-275	-231	-137	-133	-71	-42	-113	-271	-75
685	313	489	408	241	444	397	530	342	180	68	97	402	391	1480	404	184	639	566	412	807	553	772	229	251	1585	781	1296	1050	405	136	236	786	97	240	270	238	1122	603	603	312	440	591	410	72	698	538	137	725	-109
686	-78	-152	-133	42	-355	-27	-42	-462	-70	-82	-87	14	-223	-346	-41	61	-120	0	59	-3	-91	-53	-25	-152	-108	-314	-55	22	-411	-53	-441	4	-69	-26	-70	-30	-307	142	-45	-10	9	-87	-331	-37	-16	11	-101	-106	-195
687	-97	-217	-97	-328	-222	17	-31	-13	-219	-112	-89	-87	0	-355	-83	-44	-108	-202	-130	-211	-53	-161	29	-401	-271	-114	-160	-86	131	-87	-267	-231	-141	-27	-238	-113	-899	-335	-192	-185	-188	-96	-478	-84	-166	-102	-117	-279	-137
688	-100	40	124	-489	114	-159	-46	-265	-322	-94	-284	-354	-341	-239	-161	-84	-396	-491	-420	-133	-32	-155	-194	-168	-474	-508	-776	-416	98	-75	-840	-622	109	-222	-391	-180	-1344	-142	-192	-272	-120	-62	-340	-321	-142	-213	-128	-307	-219
689	76	1066	193	-297	57	102	95	-506	252	-64	182	181	293	671	26	-100	205	979	148	151	260	203	181	274	647	756	370	99	76	535	751	577	475	38	113	152	0	771	165	-136	-1146	134	11	-446	-48	368	-177	305	0
690	86	1005	19	-100	737	198	66	0	346	-6	66	195	388	986	474	133	423	413	718	126	222	434	216	-11	537	492	294	71	443	129	231	719	958	190	93	351	825	653	154	195	251	8	-60	-309	174	736	170	599	-147
691	-69	-377	605	-200	-279	-130	-308	711	56	-57	-420	320	258	338	209	-147	114	28	7	923	393	603	-236	352	480	76	900	-577	876	607	-246	-438	-150	-267	-133	822	-836	-226	587	54	-923	-218	331	-579	-80	511	-131	64	178
692	119	640	93	3	648	107	162	63	348	69	172	152	-5	1011	213	36	351	311	298	133	230	297	227	223	768	670	275	268	306	224	378	453	378	178	58	154	1005	41	280	310	130	160	345	-126	123	475	202	25	13
693	68	625	226	158	82	371	-4	161	255	-29	87	372	-13	467	425	987	101	187	144	35	734	39	24	375	4236	988	121	-25	-43	-197	341	701	339	243	-46	309	275	1081	178	253	241	-38	259	123	-11	648	194	131	305
694	86	429	57	244	565	304	179	214	-30	4	70	293	-5	1622	485	127	263	109	329	7	864	370	102	346	797	2781	602	378	285	94	26	308	228	267	46	152	518	268	440	348	681	197	313	-52	385	396	97	495	89
695	36	-251	-104	-136	590	-55	166	-63	-179	-67	-81	314	-47	-30	-8	63	11	-141	270	10	660	-213	-47	589	-510	-57	-396	186	701	-117	772	210	-131	3	70	258	952	41	74	-103	527	-299	2	-59	408	-546	288	495	106
696	87	115	44	7	-76	127	79	258	260	13	125	209	21	915	427	46	333	248	359	24	298	737	107	47	486	289	586	222	383	41	173	402	-5	43	152	194	836	268	245	160	619	-10	-151	-71	258	443	43	433	-6
697	520	377	1510	310	1143	983	1465	4129	1335	175	645	881	1033	6641	1906	832	1961	901	1872	1533	1420	2885	1385	520	2178	1217	2671	1369	1682	341	1917	1404	678	745	544	684	1990	1567	2119	1379	1325	632	817	394	2030	1664	280	1800	477
698	157	370	-186	9	457	15	-42	-211	31	-8	-158	307	-90	372	323	38	40	-179	151	-105	23	172	-88	-13	194	-63	137	176	-82	-216	-578	55	207	-13	203	104	338	1425	117	541	-174	-250	-304	23	286	211	23	-573	-154
699	1319	1044	914	429	7294	1014	834	1710	1359	571	277	953	53	7330	1889	549	864	2888	1355	208	790	1618	1008	1382	1691	3286	1349	1241	509	721	304	2605	816	1948	587	732	2000	1802	472	2381	304	745	74	1464	1127	2384	1126	1100	625
700	109	115	124	-1	228	95	204	201	128	-10	36	207	50	568	190	67	314	210	111	-151	260	537	124	7	332	403	288	17	-71	178	47	111	19	224	78	-4	391	637	240	59	290	-4	-15	137	183	490	243	-100	10
701	82	232	170	142	438	100	164	218	264	22	51	324	53	1348	380	104	396	144	202	109	408	325	135	81	482	410	294	201	115	-79	115	241	112	91	19	164	412	318	173	122	314	147	-47	132	142	582	61	181	-54
702	471	853	596	1136	2942	146	399	1757	610	284	220	663	143	3755	1110	110	784	606	387	2291	1491	1317	688	864	764	2005	1182	2540	1584	417	3373	374	124	2150	74	531	349	192	1537	160	585	582	1988	829	1219	1252	714	2917	127
703	435	539	46	65	902	165	233	265	112	-66	628	157	234	175	351	195	10	488	220	327	834	295	718	478	336	737	615	559	82	322	945	-17	65	286	223	67	-296	343	216	402	96	51	582	700	339	507	635	313	182
704	-75	-214	-585	-246	-845	-66	-313	-992	-276	-156	-308	-46	-15	24	-30	-70	-284	-54	-116	-528	-263	-1	-247	-181	169	-556	-78	-206	-1107	-592	-788	-55	-533	-125	-156	-16	10	-612	-365	-195	-909	-293	-828	-130	-372	-357	-298	263	-350
705	294	-82	-170	-110	-196	69	-33	-171	-129	-80	-39	52	-7	-157	-32	83	-61	124	-150	74	-23	211	-80	7	163	95	6	194	-158	-129	-210	-292	-150	113	-258	-60	486	276	-90	100	-48	-72	-246	74	82	-75	44	27	-109
706	-35	291	-235	-424	-57	-231	-210	-570	-186	-61	-193	95	-524	-165	-43	-41	-158	-176	-37	-454	-364	104	258	-104	59	-403	-494	309	-301	-311	-399	-35	89	-61	-129	-78	-1143	50	-264	-269	-769	-117	-645	426	-213	1320	-194	198	-175
707	252	164	323	170	362	53	148	278	237	83	105	557	490	1467	361	106	442	187	206	518	654	797	206	474	604	432	638	424	591	144	556	221	137	314	27	351	201	922	338	149	411	407	498	281	487	629	497	1044	61
708	129	831	-77	-127	749	24	206	-261	599	171	191	349	668	1263	523	158	486	115	755	-109	239	545	496	189	1114	886	641	508	202	474	803	854	177	182	-74	224	275	494	136	201	-459	-10	568	162	726	708	374	436	-75
709	466	197	0	-229	152	95	164	-147	151	-48	53	125	-7	671	220	32	214	92	240	10	106	431	67	110	833	346	212	337	213	212	289	291	112	94	-23	-43	635	326	208	152	527	194	88	181	217	293	86	279	195
710	686	712	1131	213	870	682	1103	1741	755	388	787	1152	1190	2458	279	861	1180	794	635	1166	1142	1552	1063	830	1609	2574	1640	1658	1863	865	2201	1564	442	444	544	832	1693	1525	918	761	1368	1054	1013	758	1270	1255	680	1685	622
711	507	735	419	147	1760	471	570	674	219	73	111	637	458	1544	263	421	405	560	208	1526	1113	1355	673	448	1051	864	681	1162	975	759	1424	491	205	138	305	940	1228	1374	797	506	778	507	702	309	666	1022	467	1601	-75
712	92	-38	195	-39	-44	85	264	147	-81	3	33	172	66	545	156	153	112	153	216	183	219	638	206	-67	1006	50	327	360	263	136	57	74	39	139	-15	87	52	402	376	514	-62	218	27	49	462	243	79	100	-54
713	971	442	752	779	3736	849	821	1362	657	138	1055	701	1955	2159	1157	715	1236	808	975	1914	1725	762	1323	1831	1171	3045	566	1770	2641	1458	2096	977	357	529	391	1772	-666	2054	928	-111	1596	1536	2241	910	2225	1792	1043	2029	1003
714	32	-276	161	-192	489	-4	24	-23	109	-41	-35	-2	-58	-39	-49	32	-133	89	-111	7	124	117	93	124	-124	187	0	145	38	117	-294	-77	19	54	62	69	-148	-134	138	119	96	64	103	98	99	76	171	296	27
715	235	251	157	299	44	126	84	224	206	5	326	167	237	232	256	66	-28	-57	165	408	159	139	167	104	143	308	22	355	515	-79	199	88	-146	215	-152	173	561	-301	336	182	541	-79	419	213	28	347	70	604	17
716	201	315	106	248	266	187	130	566	443	59	75	178	186	1067	368	47	297	153	490	609	411	345	332	298	441	422	779	334	427	311	546	528	359	138	168	97	1079	637	501	361	532	224	390	299	357	501	207	1058	254
717	158	385	128	153	457	117	82	60	332	61	59	316	127	817	238	169	223	257	509	144	195	710	167	126	831	50	589	227	301	189	241	846	393	370	238	87	508	394	229	386	227	55	232	160	256	674	146	268	68
718	314	620	370	231	794	185	392	187	413	36	79	431	178	1432	571	216	346	566	658	609	698	990	295	189	756	222	1123	748	389	262	599	1263	439	496	301	254	1058	-58	651	100	648	224	521	191	794	891	329	716	285
719	88	216	197	-185	514	146	110	144	349	37	106	109	165	139	390	63	84	54	582	232	183	267	240	29	439	254	428	166	219	102	199	109	-349	181	46	62	582	58	202	231	91	4	99	93	146	388	88	265	127
720	74	306	4	177	38	118	2	271	174	76	97	165	-61	448	183	-24	18	57	326	-24	213	12	85	49	285	130	442	140	104	208	189	230	144	103	93	-73	137	-427	104	97	101	-12	-49	23	91	343	119	338	-30
721	150	229	-6	110	158	100	68	13	131	45	77	383	154	827	369	173	207	141	680	84	71	379	107	100	744	495	667	306	120	-132	231	417	124	203	-7	30	243	477	141	263	48	6	2	52	230	398	143	117	68
722	1781	1550	1424	528	1289	942	1969	2274	1213	535	1217	1688	2093	3964	1033	763	2135	1409	798	3053	1287	2381	1276	1125	2627	1996	3087	2892	1847	911	2327	1751	1075	1160	340	836	3482	4393	1785	1597	2104	651	1501	934	2002	2085	1023	3211	725
723	1239	610	1357	818	1194	300	1531	1714	602	576	705	1061	1044	3543	797	763	1039	1949	660	980	1616	1888	1159	767	1648	1458	2138	1783	1967	842	1182	1218	411	1526	822	739	1852	1752	2087	1243	2650	957	1835	540	1534	1481	699	2152	828
724	306	469	173	284	139	205	146	67	436	67	208	853	135	961	278	272	484	644	771	334	91	772	454	63	498	200	586	125	465	193	299	662	237	145	-58	201	137	234	336	-54	285	220	60	160	179	790	-10	478	247
725	-259	-2060	-1202	-1429	-2217	-385	-113	-3146	-1269	-631	-1579	-577	-583	-1360	-923	-349	-1036	-1198	-1405	-2816	-1592	329	-1313	-1499	-1211	-3788	-1214	79	-3047	-1477	-4571	-2773	-1372	-732	-931	-520	-3874	-2976	-322	-1689	-1513	-239	-941	-1618	-904	-1203	-1707	-5243	-618
726	288	502	297	413	336	176	237	432	371	73	389	319	402	1550	399	216	572	389	439	669	473	612	377	120	644	610	828	242	685	117	1098	927	468	322	211	140	666	721	504	427	720	334	697	355	382	587	234	240	254
727	6	98	-139	244	50	59	-75	-271	-16	-58	21	-83	-74	-121	67	126	-130	-23	-37	454	408	-10	119	-31	51	-162	39	212	2471	-208	446	-215	-82	51	-137	-99	10	595	888	111	483	-94	-29	-60	-95	-51	35	120	-37
728	-13	357	-48	-151	1442	4	175	57	-55	3	29	70	-95	552	372	129	40	190	3	38	426	419	-26	63	510	136	2393	209	126	41	-26	-78	-83	473	-121	-64	1302	1618	264	92	1049	115	-9	154	1131	142	85	618	-116
729	79	174	181	87	108	104	117	171	123	97	47	262	39	563	226	155	172	112	308	7	156	357	160	45	472	130	225	189	32	30	173	125	102	61	101	208	349	259	104	266	135	27	144	111	251	216	56	193	3
730	1149	1969	645	915	838	1088	590	1355	1451	731	993	1053	615	1083	1321	701	235	1785	1028	634	2599	310	1655	965	2148	3140	360	3554	2077	778	1875	2538	1141	775	352	718	465	2967	595	1483	2104	1146	943	1731	1163	834	1149	2379	1013
731	200	23	221	84	19	108	68	70	129	45	62	230	7	275	266	104	75	101	68	7	260	108	133	77	301	378	363	580	153	151	126	57	149	153	19	50	328	343	77	179	493	89	-36	81	88	325	7	72	116
732	563	833	909	480	2300	481	956	1036	642	199	735	730	809	1457	681	261	218	1010	430	1099	1021	450	711	731	972	2406	-62	1349	2027	1006	1071	609	-36	560	227	531	688	1383	461	1191	1615	578	977	594	803	707	1005	1069	804
733	-41	46	-210	63	216	71	48	117	31	130	2	37	13	366	1173	86	-136	-231	-135	733	4857	-152	-98	211	63	454	78	764	164	-75	373	26	-201	246	-133	-97	-921	1073	314	111	681	111	178	115	-35	-20	229	285	61
734	303	578	-57	-99	222	144	273	352	224	57	23	126	207	888	332	167	321	309	304	567	352	241	446	90	646	635	140	380	98	478	1135	410	17	86	187	478	222	1022	277	533	9	218	609	98	204	383	170	212	412
735	41	251	44	7	444	204	304	271	203	194	288	344	122	893	1981	658	304	340	206	3733	5585	182	529	272	2505	4354	3100	2560	5607	87	4224	849	373	1167	-78	108	5896	5130	2522	1123	9673	299	1970	423	1313	369	683	7808	134
736	199	658	332	-39	1118	388	550	473	619	54	356	418	410	1291	487	327	644	560	956	504	236	1175	441	266	1707	572	1015	620	520	-148	651	645	334	435	238	219	889	477	776	345	836	441	772	247	655	552	240	660	103
737	137	241	232	220	546	55	281	660	160	181	239	220	154	420	135	110	254	199	153	461	618	170	189	189	194	1926	209	270	405	205	620	294	442	234	199	143	614	603	106	424	488	173	261	560	106	567	297	691	171
738	-117	-268	44	271	2179	-53	286	348	56	490	31	582	-61	9	422	-80	64	31	51	-38	97	-179	-134	90	689	-1087	-196	250	-909	-258	110	369	316	191	250	-11	561	75	-69	-312	-24	59	-562	-221	28	38	105	75	340
739	305	709	632	633	718	356	297	1351	510	133	528	353	428	1876	738	232	776	233	496	1142	630	905	494	1034	1323	1344	1037	1333	1320	337	1071	717	911	280	168	332	942	637	733	340	1818	649	485	514	777	705	473	688	-113
740	127	224	42	100	279	247	95	459	195	11	38	259	189	1042	419	44	120	164	318	334	506	345	131	274	1662	619	697	347	153	246	593	453	783	99	19	76	529	293	469	312	648	218	313	-25	226	409	288	397	116
741	212	553	224	-248	260	474	317	1355	843	275	418	249	631	492	910	278	470	141	744	1131	926	500	632	506	189	785	982	654	2110	998	2138	1567	1135	330	82	316	709	100	739	546	1654	479	1284	777	554	1168	625	1556	707
742	45	122	22	76	133	105	144	-774	178	30	83	64	159	511	125	78	92	98	169	208	239	1011	103	-75	122	-266	628	163	230	-258	215	-2	-439	-19	-90	69	645	0	128	19	-19	205	47	45	215	129	-50	184	-199
743	155	149	-8	-246	330	89	124	231	324	73	107	51	109	529	253	21	75	404	303	359	346	233	236	69	198	346	556	329	728	30	767	335	-166	21	46	166	444	25	408	182	295	17	395	77	159	148	62	347	137
744	289	206	-31	54	737	258	124	60	775	67	105	1235	85	1819	804	93	525	216	789	296	328	1835	239	183	921	473	867	378	290	280	299	913	87	612	160	277	486	444	314	304	290	100	270	235	380	1404	207	377	13
745	83	315	122	42	63	63	-26	-46	195	94	86	127	47	466	281	101	144	5	564	148	133	390	106	19	401	-117	150	71	208	26	52	309	168	15	43	48	211	125	146	-19	-19	-12	-11	84	168	427	-52	11	0
746	5793	2276	6811	8127	3641	5154	5611	6132	8331	8391	12012	7007	6111	5570	7283	9106	8154	2943	8177	2700	5130	6694	10361	4829	4764	7116	3863	5386	4560	5551	3662	10283	7330	6858	3898	3559	1820	3269	4838	7113	2515	4949	5117	7836	3988	8136	6862	4118	8818
747	57	251	201	-171	-108	39	97	-3	81	-11	125	237	133	319	150	50	285	205	170	313	298	171	93	51	415	270	484	232	427	-170	320	203	-53	198	105	99	254	-444	106	59	217	126	88	189	50	150	125	439	58
748	119	251	137	-78	12	266	219	87	83	44	113	289	199	917	279	61	225	101	196	715	674	443	103	73	486	619	916	416	838	239	583	252	131	195	-43	99	391	880	576	130	667	119	390	66	406	312	167	369	92
749	141	75	84	-56	6	85	142	-40	212	-2	115	178	221	402	105	30	75	98	211	465	213	160	125	63	259	464	383	143	131	-22	520	309	214	182	19	161	31	251	221	141	135	197	51	194	282	226	174	69	161
750	-37	1044	-279	-293	-247	-108	-175	-1177	48	176	-246	37	476	-96	-76	-86	-90	1239	3	-176	11	428	-250	444	208	645	-72	-61	-295	258	-131	44	73	18	728	9	-349	620	277	-57	-1010	27	-496	-259	-221	46	65	-377	780
751	636	1183	2646	1243	743	336	357	1741	1598	352	629	1597	535	3686	1214	326	1327	2657	881	1357	1349	1152	1271	482	886	3413	943	1441	1858	675	1523	2851	1098	706	716	1800	772	1467	1022	2038	2258	516	1056	865	747	2691	641	2206	2398
752	-119	-248	-206	-65	-108	-95	-359	-332	-223	-221	-13	-28	-149	207	-114	-63	-129	63	-168	-112	-254	-165	-304	-193	-19	-867	88	-10	-564	-770	-746	-62	12	47	-113	-187	-825	-620	-210	-78	-319	-231	-239	-243	-200	-184	-43	-596	-371
753	99	221	126	84	139	143	126	83	227	-13	71	337	127	787	221	141	393	135	263	338	370	460	197	-29	382	104	183	219	591	148	373	585	344	91	3	152	338	578	282	304	135	184	230	11	256	479	91	428	75
754	504	202	1777	1022	368	603	1276	1559	814	238	768	1378	852	2643	598	420	1582	661	446	2150	1210	1825	906	747	1229	1808	1489	1604	2625	1055	1655	917	482	1058	223	744	677	402	1838	367	1170	692	1715	965	1039	1184	1299	2057	450
755	-197	-543	-303	-396	533	-4	-19	83	-476	-152	-79	-626	-85	-688	-310	-218	-315	-906	-625	363	216	-435	-181	-55	-419	-311	-36	-224	71	-429	246	-683	-208	-291	-266	-50	-1715	-293	2	-133	-251	111	0	-113	-352	-612	-61	282	-285
756	55	-150	-73	-400	101	-39	0	-110	11	54	22	4	-71	6	16	43	-65	-135	5	17	88	-63	-7	21	47	-216	-3	0	-27	113	152	-49	-70	109	-54	-131	-232	-75	13	-65	-120	32	-38	-3	-37	72	-32	-198	-161
757	138	447	90	41	260	144	146	261	450	125	142	228	191	613	283	70	294	346	479	236	195	368	136	168	417	375	347	130	520	113	651	510	411	192	43	145	158	176	77	130	237	74	356	49	142	404	53	498	58
758	-32	-132	-104	-65	222	24	79	174	-56	-9	22	2	15	-12	-11	93	-146	46	-29	271	177	-98	40	43	33	-38	85	51	158	-15	299	-137	-68	62	-144	-25	105	67	-5	-76	-43	0	189	-94	-18	-64	-17	330	199
759	130	291	119	257	196	37	68	140	234	76	68	185	5	520	244	4	212	202	259	105	94	285	32	15	445	375	170	181	164	250	136	184	242	161	199	-4	307	125	200	57	290	96	15	98	162	368	31	162	41
760	46	155	-4	76	222	39	-6	80	28	-96	87	20	127	2	4	43	-81	181	96	236	142	37	33	21	92	254	75	99	109	-3	189	8	218	26	121	2	508	-377	-13	160	106	6	97	8	16	71	-62	187	123
761	-44	-191	-73	-257	6	-43	39	-40	-45	-30	-38	-58	34	153	-53	-3	-18	-199	-134	447	263	-80	-97	-235	-45	-171	3	5	-186	-265	-189	-134	-70	63	-129	-291	275	-586	168	-168	-130	98	-101	-252	46	-24	1	-212	-79
762	-78	5	-157	-282	-235	24	62	130	388	-4	-139	93	15	138	136	69	379	404	316	483	239	-40	98	67	1061	-152	265	-15	252	-288	-10	124	18	-6	-43	46	508	402	85	43	-62	38	85	-15	24	196	-46	44	-48
763	162	610	130	203	597	158	384	503	421	135	215	177	442	657	216	15	456	167	484	916	666	115	386	181	651	1443	628	222	361	470	940	268	307	190	82	184	772	938	298	185	478	192	422	169	421	279	350	1077	137
764	-375	-491	-820	-1084	-57	-320	-461	-1442	-909	-533	-614	-647	-615	-1296	-274	-216	-1351	-216	-513	-743	-603	-234	-736	-369	-480	-3588	-1509	-743	-1731	-842	-3126	-990	-936	-307	-653	-397	-1164	-444	-1251	-367	-1659	-415	-1173	-719	-644	-1259	-449	-1128	-862
765	102	53	57	65	158	-11	77	83	8	62	-2	20	-31	87	-43	49	3	89	44	373	8	38	56	79	238	-88	81	-10	290	72	-42	36	330	41	66	78	381	352	173	-19	14	89	139	-47	76	87	35	44	120
766	46	147	237	-42	667	156	11	197	37	1	36	109	77	260	98	64	115	63	103	200	183	74	-43	403	183	247	42	199	-71	-262	131	214	53	-3	133	124	359	-8	138	149	295	83	151	32	97	177	98	47	151
767	92	-363	62	147	552	127	104	248	-99	-32	131	65	175	396	-4	24	-55	222	-121	1011	239	-89	181	583	7	479	297	263	1288	140	599	-40	-205	41	-129	53	-434	192	571	133	19	244	94	231	73	-88	183	78	109
768	221	519	330	360	-768	195	257	1972	909	47	478	380	372	487	799	169	509	560	975	1332	645	610	517	304	600	909	1008	523	1112	129	1397	1154	669	255	270	506	1079	813	613	-253	203	377	754	643	601	1044	622	1380	329
769	-31	-437	-26	80	-139	-120	-24	97	-201	-74	7	-61	-31	-393	-36	-18	-66	-101	-191	193	-91	-125	-42	-35	-269	-317	-137	-15	-180	-170	-231	-329	-198	-58	-74	-18	232	-50	-26	46	-232	-122	-239	-22	-24	-83	-101	-257	-44
770	632	1089	789	1521	-38	672	1196	2022	699	307	497	2259	551	5737	604	286	3354	381	144	2150	671	3792	78	793	949	1627	1673	1620	1266	148	5	-310	350	1333	544	993	243	1551	1278	117	2442	906	1103	1110	987	1436	804	716	89
771	126	155	887	418	228	223	24	77	109	95	108	645	130	42	20	83	133	-54	97	483	497	-28	285	120	-7	451	343	465	164	22	588	29	-117	262	137	147	-21	989	266	78	256	199	207	355	99	704	235	638	154
772	211	41	135	153	254	156	197	-36	97	-34	0	145	5	139	232	123	106	196	240	200	589	11	151	160	642	79	222	145	-164	-155	325	107	31	214	62	80	275	-25	170	331	241	-34	83	111	273	429	152	534	10
773	-8	55	110	209	-165	20	64	207	62	13	60	8	-42	13	-3	72	77	8	6	310	106	-25	25	227	-49	394	130	201	394	102	562	38	-25	69	7	108	582	192	170	133	-149	49	451	187	18	-39	-40	352	151
774	1640	1738	907	923	438	533	859	949	567	1205	745	1891	647	2450	2043	601	1982	418	1028	609	515	2025	912	595	1154	2256	1457	1129	1041	505	909	1818	1304	1172	1718	335	931	201	2004	506	875	1279	975	959	945	2099	780	1021	570
775	86	73	272	-377	95	118	64	26	11	91	111	284	223	281	153	152	228	92	112	447	414	45	296	29	187	247	121	337	115	372	546	369	120	141	-35	92	518	-234	202	179	430	124	282	89	110	245	320	179	-54
776	28	110	-70	121	305	27	39	-120	81	10	39	111	-53	224	78	121	60	83	227	190	115	168	71	13	76	3	291	-17	186	72	-15	177	137	49	-58	-46	423	184	34	174	67	235	-124	-52	29	213	104	114	51
777	32	-98	-190	-63	158	23	-68	-6	-144	-19	-36	-32	-74	-649	-28	-3	-95	-37	-37	116	162	-115	62	-120	21	193	-55	-56	27	159	36	-188	-139	34	27	-140	222	-8	-133	-87	-101	44	-27	23	18	-81	29	-27	54
778	351	343	614	411	158	317	319	738	921	209	354	1630	711	1142	415	286	503	63	916	578	722	1143	471	308	208	1128	648	623	306	311	782	633	154	340	442	610	1069	1073	467	484	527	415	483	231	333	1512	452	313	474
779	1126	958	403	334	838	437	574	919	879	119	324	728	380	1558	564	193	702	346	676	2231	677	924	787	452	1057	2002	694	283	718	353	956	684	591	544	254	466	370	1047	120	944	1475	456	453	392	876	2023	755	632	195
780	5	-78	-4	-130	196	98	6	80	8	36	8	11	29	18	74	24	135	-89	-117	-183	198	29	85	-114	27	168	81	-53	-137	-186	-89	78	-5	200	137	64	285	226	-34	84	-125	143	-22	-99	9	-43	56	97	-109
781	554	2117	1419	1347	1010	997	1835	1754	1983	2628	1284	4360	588	7036	1491	1669	4104	1042	2289	1054	1459	5484	1326	650	4010	1862	2409	1581	723	786	530	2092	1586	984	904	970	1736	1525	1080	974	1325	1523	553	1068	1152	3038	786	1590	164
782	-39	-355	-8	-119	-317	62	-53	-134	-120	-4	-12	-44	-79	-411	-42	-6	-62	-69	-25	-70	-8	-42	-60	-5	-151	-79	22	-63	-208	41	-5	-237	15	27	121	-60	10	-184	160	13	256	132	60	-121	-132	-79	70	-53	44
783	84	1191	266	-170	-31	229	93	191	631	118	-137	413	226	848	330	10	405	748	699	472	210	525	320	90	809	518	622	10	443	615	599	829	414	137	-46	-140	-21	721	210	394	-82	263	-85	44	314	784	282	725	41
784	13	105	15	-117	-25	15	26	-13	39	-19	70	20	34	9	18	35	16	-28	91	56	5	11	16	75	110	88	-52	25	32	-56	231	91	38	34	35	-30	-63	92	-93	-32	-72	-36	-45	0	18	96	44	95	-10
785	-40	-157	-35	-295	19	-37	-48	278	-194	-36	-72	-17	55	75	66	-47	87	181	165	-21	171	-176	58	-219	267	-60	49	-10	131	132	457	-42	-268	-61	3	-94	-169	494	-24	209	246	-128	-51	-66	86	92	-82	-72	-137
786	-7	-139	19	-164	-88	-28	-17	87	-121	6	10	-29	79	-226	-28	4	-12	20	-101	158	118	-91	32	-51	-5	108	-65	-22	-38	-49	-168	-133	-166	45	-15	11	-137	33	53	-48	-106	-36	103	-208	33	-9	-37	-159	-51
787	41	274	95	-723	-324	-7	-326	506	222	76	-138	39	-194	-82	170	26	-138	-135	-208	116	372	267	49	-245	543	260	235	240	-295	-1522	604	-376	-252	95	148	-131	-412	-519	173	-209	280	-291	-178	25	294	398	-149	-1296	-171
788	122	187	110	117	101	55	22	412	40	94	152	96	173	-127	90	90	129	300	282	483	251	-5	215	110	173	381	163	242	274	205	509	101	70	69	105	6	328	192	160	122	120	57	214	160	191	110	164	316	219
789	1249	6320	521	794	1309	1012	1758	1469	2053	1583	853	902	2349	4682	1617	538	2177	2102	4159	2073	1343	3104	2034	1259	6966	6477	1961	2463	4192	1241	4287	2457	1143	1231	1628	1398	2498	1198	2791	726	2868	1266	2232	726	2907	2359	910	1769	876
790	-8	-98	-88	-282	-216	36	-202	-174	-119	16	-78	-98	21	-196	-59	10	-85	-37	-53	66	91	-50	-58	-5	-171	-127	-140	-140	-131	-235	-252	-181	279	-33	-7	-136	-497	276	8	70	-275	-55	-103	-45	-86	-147	-155	-184	79
791	1342	821	230	-71	1283	529	1227	607	696	341	375	807	511	2929	1203	496	1020	176	597	2224	965	2783	710	237	2109	1805	1263	1799	816	208	846	911	875	622	364	316	1429	452	2169	680	851	1339	1817	389	1906	1580	286	862	202
792	113	88	102	-168	139	114	135	117	203	59	-7	93	167	693	114	50	267	135	225	204	62	531	133	0	500	228	229	66	169	22	99	212	29	18	-15	34	-21	83	298	117	-130	137	74	74	192	250	65	249	58
793	153	-211	113	-155	-69	78	-68	161	-101	81	120	-20	55	-66	153	73	273	124	-322	232	56	-103	89	247	-189	286	117	201	-5	-94	115	267	357	43	-101	9	-338	427	144	133	72	-62	-63	169	-9	-83	77	265	151
794	1606	906	1686	846	590	1544	1418	1808	2447	1326	1717	2810	769	3272	1633	800	2177	1181	1000	638	1261	4933	1077	840	2330	1325	1676	1180	1057	854	861	2021	1312	1292	383	769	529	645	923	761	1315	869	733	773	1039	3485	1147	935	780
795	339	546	570	689	559	179	608	704	1010	492	658	782	119	1220	549	352	795	522	564	920	550	607	427	502	397	591	733	572	1337	322	1334	576	613	348	536	293	508	285	221	261	996	287	720	672	505	692	696	1128	563
796	-64	112	-64	7	-95	-97	-64	-375	122	-40	-51	-98	-258	20	100	-16	-30	34	70	-74	41	-2	-163	-108	110	-133	-3	-109	-345	-307	-115	-90	-35	-41	-160	-32	-275	-1785	-61	-117	-159	186	-198	-133	73	132	-14	-19	151
797	-179	-217	-110	-127	-6	-155	-135	-379	-186	-2	-91	-138	-231	-288	-64	-18	-87	-314	-229	-306	-222	-148	-236	-83	-293	-476	-379	-2	-120	-94	-5	-304	-133	-110	-211	-92	-550	50	-88	-54	-120	34	-135	-165	-50	-161	-155	-473	-44
798	2980	1801	4772	3271	1703	1348	2548	2432	2442	3245	1976	7537	655	8377	1825	1360	3751	1678	1529	1159	1237	9553	1258	2139	1695	1862	2848	2368	1770	1499	1476	2157	1105	3998	1440	2858	1217	1710	2081	987	880	2059	1508	2497	1680	2458	2753	1732	766
799	400	2274	585	671	1537	453	479	1311	1271	458	666	898	719	2065	863	261	1063	1195	1658	1431	1207	810	1012	518	2034	2317	1574	794	1315	934	3189	1655	1064	555	575	346	3673	913	867	1061	2171	428	1794	1149	934	2008	676	3488	615
800	223	283	221	115	355	97	246	855	316	173	422	248	245	414	172	127	223	277	218	345	535	149	398	102	533	553	510	613	520	417	315	264	312	387	195	184	148	259	405	35	812	192	176	18	299	892	288	526	189
801	24	-249	-272	-383	-235	-56	-62	-486	-201	-136	-289	-85	-199	-435	-151	-13	-207	-124	-158	-408	59	-73	-277	-108	-279	-419	-242	-66	-411	-11	5	-218	-290	-21	-133	16	-423	-41	-154	5	-87	-32	-225	-235	-59	-150	-141	-223	-206
802	302	576	326	282	438	321	346	801	356	108	303	300	135	704	207	156	378	398	646	655	796	166	386	450	261	1128	609	314	202	569	1145	514	269	91	262	346	1333	1198	408	155	590	319	374	325	659	525	417	1229	51
803	-129	-313	-159	-897	-349	-97	-166	-372	-412	-196	-194	-101	-122	-267	-343	-40	-669	-239	-284	-416	-62	-273	-244	-138	-204	-715	-347	-608	-224	-588	-436	-357	-475	-7	-133	-159	-783	-779	-53	-277	-585	-102	-408	-257	-132	-568	-159	-419	-89
804	2107	6657	4976	2271	8775	7304	9683	13573	8333	728	6460	6903	7645	15417	9594	3346	11885	12198	8419	18114	4984	12135	6633	5462	11208	9595	13434	11814	13307	8114	19610	12985	7119	4976	2513	5544	12185	11276	14510	8754	13151	8894	15934	5397	12093	12952	5078	12357	3958
805	1554	1394	754	-616	1836	260	210	738	989	-203	620	1496	317	2105	320	249	373	-127	-259	303	358	1897	317	128	649	98	124	-145	-5	129	-646	-443	-35	757	853	120	1005	1140	587	1575	-367	674	541	-125	691	1207	876	1111	-3
806	1018	2681	1395	699	228	455	992	2271	454	1121	1445	1244	785	1384	1021	632	822	4095	1598	2143	1192	671	1426	488	1081	4249	2423	2407	5382	432	2495	2849	1077	1820	771	404	539	1089	1910	748	4130	1746	3052	1129	2341	1070	1776	1215	2257
807	74	-13	-37	-179	88	-60	42	134	-56	22	25	-28	23	-570	33	27	-14	314	77	183	171	-180	168	57	-1	381	-108	-68	27	34	325	-74	-180	191	-35	39	169	503	50	114	0	38	155	-23	151	100	186	92	-154
808	139	549	208	50	851	278	217	627	343	116	256	353	277	922	301	156	297	704	537	796	663	256	396	579	492	2202	428	199	739	558	888	511	363	219	27	295	349	259	675	92	493	355	636	242	447	519	414	926	298
809	-4	46	137	-643	-50	-37	6	-3	438	96	60	249	26	10	117	9	22	-14	335	49	91	34	-1	-21	100	568	144	153	93	56	331	48	204	51	78	-76	243	-108	37	122	33	70	-92	137	-1	437	-34	235	127
810	85	-239	55	170	114	55	-48	-3	-174	-33	-48	218	-29	133	-111	-16	212	-135	-282	274	266	12	7	524	-157	123	160	227	60	-106	-26	-98	-65	177	50	43	232	-737	202	32	425	164	135	253	451	48	453	-33	-92
811	-37	53	15	-183	-6	-124	4	-3	-90	2	10	-7	-61	-59	-50	15	-104	-34	-74	-137	-11	-16	-199	-37	76	-336	-58	68	-131	87	-394	-193	-2	-3	-125	-32	105	67	53	-103	-140	-147	-259	45	-95	-125	189	-288	-30
812	9957	21224	9508	13744	4829	6862	6237	6914	16065	11958	9337	15768	6646	12804	16558	7800	12864	4953	15198	6120	4469	14741	8863	3733	8055	12698	4469	4748	4516	4446	6683	15756	15315	5032	11790	11068	1916	2272	9175	7641	2321	8266	11111	6237	7788	12843	5384	3600	6354
813	310	-122	199	390	324	111	426	506	510	157	332	377	444	439	205	293	285	1008	656	990	671	320	176	508	405	1522	497	539	1457	326	1896	606	342	479	140	240	1175	804	544	329	459	250	945	501	509	757	694	274	326
814	154	202	226	140	1220	281	142	234	336	111	299	206	333	224	736	187	63	517	216	123	378	173	247	490	321	756	304	155	597	391	588	936	134	315	-7	244	370	536	298	857	469	164	225	281	260	462	332	587	116
815	2241	3131	4457	2349	2147	997	843	4102	1275	985	1224	5224	1129	5944	4051	740	1649	3061	755	1593	3874	6273	1765	642	9690	3032	3379	2351	1326	1385	3073	3945	942	2787	872	1698	3101	4208	3744	3140	5383	2969	2341	1615	2412	5362	1708	3703	1079
816	925	1084	1073	1100	514	607	810	1204	1008	499	825	912	591	2342	729	281	1222	277	676	1110	458	1747	974	211	846	2984	1024	1070	1183	387	1460	990	472	364	399	524	592	771	1529	312	1068	640	1641	709	841	1204	471	1178	223
817	725	1002	1144	310	2325	481	44	261	476	199	235	477	492	884	463	216	948	652	742	1459	3060	447	3968	306	523	2650	1368	1985	-16	672	2296	1298	898	1276	270	661	1693	1651	1136	1039	299	758	1024	937	831	1068	741	2077	-79
818	336	295	259	381	470	366	128	506	259	123	162	340	53	700	247	124	280	401	380	35	349	338	400	363	539	772	333	181	241	205	493	152	93	374	137	127	529	310	152	97	396	72	435	424	457	837	358	590	223
819	195	368	332	762	476	332	208	550	373	136	266	383	266	711	151	73	306	476	363	486	331	279	501	312	502	991	523	311	849	649	846	366	214	216	207	312	21	595	336	285	769	173	442	540	236	418	461	391	347
820	204	73	186	271	158	166	31	278	132	65	48	373	255	591	229	169	409	332	229	126	254	157	184	156	1002	235	327	150	76	170	294	202	41	223	-39	194	561	335	125	185	-19	147	234	194	134	578	180	-25	137
821	443	809	354	471	171	508	510	798	997	147	503	355	229	938	515	733	323	883	876	408	914	432	587	401	1160	467	1159	493	981	334	1019	1039	986	938	285	489	666	997	464	424	556	338	514	682	492	1354	559	1299	718
822	-336	-476	-104	-771	-381	-314	-179	-1831	-526	-138	-582	-267	-644	-217	-201	-226	-420	-597	-488	-1382	-902	-186	-445	-706	-155	-1900	-527	-825	-1578	-1161	-1812	-764	-559	-423	-367	-446	-1111	-2070	-493	-530	-1368	-559	-598	-760	-500	-445	-680	-2001	-367
823	-734	-973	-1650	-2078	-1073	-1364	-719	-3139	-1484	-1070	-1449	-1472	-1438	-696	-433	-393	-1753	-3651	-760	-2767	-1595	-454	-1991	-1212	-898	-3089	-1581	-1609	-2817	-2965	-4067	-1055	-661	-938	-1283	-1608	-4044	-2775	-947	-1504	-2824	-1062	-3226	-1251	-1110	-1263	-1316	-2609	-1030
824	400	219	439	1071	451	274	59	711	243	137	232	204	618	1802	338	229	278	138	1128	370	254	300	810	205	732	1519	720	697	553	7	446	529	168	284	442	663	434	201	429	-24	222	-36	99	116	417	759	217	884	178
825	-139	-40	-297	-7	-216	-144	-148	-634	-171	-163	-247	-118	-197	-45	-254	-104	-294	80	-173	-236	-195	-60	-343	-183	-74	-680	-265	-398	-487	-649	-399	-305	-194	-115	-82	20	-645	-494	-248	-421	-1165	-321	-275	-387	-170	-335	-110	-394	-292
826	-380	-271	-831	-370	-559	-223	-617	-677	-350	-324	-508	-387	-498	-993	-546	-310	-1054	-28	-287	-1099	-1033	-41	-875	-603	-443	-1465	-376	-894	-1019	-820	-1381	-1566	-740	-516	-422	-175	-3123	-310	-424	-234	-918	-764	-1241	-629	-406	-509	-505	-1802	-635
827	-176	-117	-357	26	-571	-118	79	-650	9	-136	-335	-362	-202	-108	-59	-86	-36	-158	-115	-398	-438	-59	-117	-235	-269	-619	-389	-342	-712	-486	-630	-614	-262	-71	-411	-214	42	-897	-101	-103	-802	-156	-521	-431	-215	-356	-376	-867	-223
828	-333	-442	-1118	-882	-235	-340	-503	-1304	-872	-174	-895	-494	-857	-267	-592	-49	-868	-430	-759	-1459	-1027	-733	-673	-779	-760	-1109	-795	-1420	-3085	-1891	-1523	-1996	-596	-704	-414	-476	-349	-997	-627	-397	-2282	-443	-2115	-937	-668	-775	-873	-2166	-1491
829	-200	-378	-439	213	-400	-149	-408	-442	-330	-149	-243	-251	-298	-250	-240	-109	-340	-138	-331	-483	-488	-209	-266	-373	-388	-686	-399	-237	-586	-839	-409	-490	-430	-181	-238	-214	-359	-519	-280	-253	-285	-473	-322	-233	-443	-357	-241	-730	-130
830	131	353	406	315	-660	160	215	657	104	11	160	81	269	428	167	80	122	95	134	356	269	156	390	154	-7	537	130	309	476	-11	367	-19	227	174	62	214	-2085	-2154	349	-985	643	29	607	164	149	64	137	520	357
831	-160	85	-348	-1192	-514	-311	-321	-1301	-397	-130	-341	-342	-293	77	-286	-87	-546	-80	-351	-729	-133	-111	-467	-336	-484	-794	-464	-370	-876	-729	-289	-810	-608	-234	-117	-16	-984	-301	-165	-342	-952	-184	-954	-534	-322	-425	-443	-1010	-914
832	70	357	403	11	343	184	115	177	283	3	95	155	127	360	177	33	172	132	183	616	606	167	172	108	114	495	255	334	443	-148	599	271	105	142	39	293	1058	1207	539	427	875	-59	-230	79	249	453	222	590	278
833	917	1446	1184	-48	-514	543	1074	805	1070	512	845	857	229	2129	1275	369	1863	164	278	1297	745	1612	394	678	543	877	576	380	904	505	1029	1051	831	525	837	251	148	561	1027	304	1586	844	1085	871	891	867	694	1013	536
834	4989	3241	12561	3983	4632	5070	5467	9044	3779	1917	6018	6767	2791	9955	3572	1833	13319	2738	2030	7714	6666	6109	3318	6828	3115	10291	5137	3414	5228	3071	4019	2733	2395	6334	2235	4809	4933	8182	5847	3159	5823	5526	4451	10269	3620	7274	6813	5803	1728
835	162	1300	696	1155	184	446	705	1445	1059	132	695	599	1174	1322	682	270	809	1117	1219	1403	953	343	506	717	894	2415	455	994	2159	941	2117	1062	1030	578	724	670	2223	1316	1104	987	764	696	1178	943	944	1024	968	1800	786
836	87	859	224	846	203	168	221	426	285	114	202	231	141	741	254	132	444	537	430	430	-71	137	362	231	766	419	442	260	87	448	1014	469	540	143	31	198	137	167	194	-70	464	152	399	25	316	508	255	411	-147
837	-8	-182	-48	-220	-139	-46	-175	171	-133	-137	-28	18	-138	-75	-27	-36	-140	-17	-165	-133	-76	-33	-116	-63	11	-244	-68	-5	-49	-299	-189	-70	-29	70	-58	-62	-423	-293	8	-111	-227	4	-124	-37	-52	-89	52	-5	-17
838	-4	320	135	183	-146	7	-2	-540	-25	8	-121	-65	-47	-84	-49	-164	-39	-199	-259	-151	-192	11	-15	-21	66	-111	-415	-242	-389	-243	-514	-332	215	-50	-125	-110	-370	-259	149	-95	-657	-246	-246	-142	-161	-112	-8	-97	103
839	160	1605	268	308	311	303	186	462	781	58	371	218	620	835	505	149	639	918	852	994	669	494	691	480	833	1465	317	311	87	706	1334	1226	826	235	207	251	486	1173	178	432	178	149	970	387	670	854	550	1136	-216
840	295	1486	241	188	489	150	173	654	843	78	244	485	221	1002	554	140	671	771	875	380	148	495	335	375	728	511	667	357	482	-170	714	1039	1004	189	70	325	656	452	336	242	657	66	480	423	342	837	286	590	34
841	-221	-137	-286	59	-457	-160	-257	-459	-529	-179	-354	-394	-591	-326	-198	-41	-269	-375	-555	-631	-328	-167	-323	-357	-403	-1411	-235	-102	-1129	-516	-1550	-547	-221	-167	-82	-312	-783	-729	-264	-247	-1296	-222	-1216	-264	-352	-380	-562	-1847	-931
842	200	707	312	884	-120	147	233	691	296	123	199	266	285	634	195	167	342	11	260	447	269	337	258	294	614	273	343	544	1063	106	352	545	594	344	313	270	-31	821	528	190	851	109	1094	592	522	326	295	377	742
843	11	-110	-42	-95	-69	62	-48	13	-91	-5	18	-45	-29	-205	-26	-16	7	109	-67	28	-44	9	-102	-69	-13	-359	62	25	-60	-106	-189	-80	12	110	7	16	-328	142	-37	-100	-353	-55	-185	-165	-13	-57	40	-111	-195
844	36	-103	-13	-293	-184	27	-110	13	-72	20	-8	-36	7	-71	-28	50	-26	-320	-242	-14	-103	8	-8	-51	258	-47	75	120	131	-94	225	-85	386	-19	-7	32	169	-150	-61	78	246	-85	-90	-6	114	-63	-34	-156	3
845	997	293	193	11	177	121	88	311	397	158	142	372	63	431	318	135	337	387	528	373	91	480	183	110	1022	781	144	288	197	91	341	437	144	196	93	372	-95	561	170	204	333	119	-22	203	162	492	252	167	-34
846	27	98	122	121	38	5	-115	-161	24	30	-1	46	85	44	11	-13	1	20	82	38	-50	34	33	49	37	136	19	25	38	-34	73	85	149	-21	11	-36	-105	-410	32	-76	154	74	6	8	9	83	-4	-97	-109
847	107	341	197	145	152	308	248	506	291	71	134	251	53	1376	248	123	509	173	169	549	233	346	239	37	642	1106	271	482	712	299	546	172	-9	274	168	208	412	1148	352	272	754	261	783	240	384	622	135	531	326
848	264	1072	297	514	508	60	164	634	786	115	201	395	207	566	390	198	152	262	588	211	387	340	376	176	319	781	550	592	465	341	614	429	310	177	82	171	783	427	445	291	725	81	313	113	395	582	207	512	130
849	-522	-323	-505	-560	-50	-552	590	-325	-49	-206	-623	125	-503	1797	21	173	-228	-176	-294	599	-210	260	-764	-116	139	-1624	546	-7	-367	-1803	-1066	133	-65	185	-649	-166	-1280	-2632	274	-351	-474	-147	-300	-413	312	150	-137	109	-539
850	-42	-335	-57	143	190	-49	-4	426	-292	-91	-45	-200	31	-236	-9	40	-95	-153	-226	-88	438	-51	-152	65	-191	-187	-242	58	230	117	-336	-53	1	22	101	55	921	-335	181	416	116	70	11	-128	-16	-310	74	58	213
851	-54	196	297	-177	190	31	170	550	234	-46	347	121	458	248	239	-3	-68	265	197	274	464	110	385	490	204	1611	399	332	230	607	1245	499	576	163	113	374	1333	645	405	285	-135	134	501	-218	256	440	595	453	72
852	317	-159	-6	13	146	-30	22	26	-118	71	5	174	-133	-160	59	0	54	66	-110	250	248	58	56	-55	171	-73	379	186	285	-37	273	-118	-468	43	62	104	-158	-16	144	65	430	89	60	-152	56	52	-25	-30	-13
853	-2	113	59	74	-101	47	22	40	37	-25	39	66	37	90	58	32	45	-14	155	56	59	73	90	-81	126	22	52	-2	142	87	178	178	175	63	70	2	-84	134	13	114	207	38	81	62	22	97	26	95	72
854	809	1810	1413	1057	3323	916	978	2656	1078	444	1351	819	1473	1786	937	466	1388	1946	1040	2432	1660	744	1840	1477	1552	3728	1453	1914	3743	1989	3294	2598	1362	1227	994	1144	4520	3345	1561	1921	3946	1157	2291	1227	1461	1297	1486	3073	1694
855	-29	31	224	158	-254	15	159	184	56	91	99	74	170	96	88	-26	101	46	34	98	47	58	-15	253	43	28	29	68	345	250	10	205	124	-95	70	53	-285	108	40	136	82	51	137	186	43	119	62	288	-37
856	-115	-447	-70	-409	-279	-78	-115	-157	-235	-195	85	-276	106	-605	-183	-21	-245	43	-77	391	136	-134	33	-201	-31	82	-320	342	-16	-318	793	-691	-512	27	-281	-90	476	285	-53	-144	-498	-27	-79	-138	-103	-368	44	-156	24
857	-38	194	113	332	114	66	84	231	-4	17	-23	79	-31	36	-94	32	-6	-43	170	-74	-47	79	263	140	-31	123	101	84	378	182	520	92	7	19	78	13	190	41	146	54	111	154	-45	32	46	37	146	419	127
858	-144	268	-361	-682	-177	-218	-215	-1029	140	-180	-354	86	-447	216	78	-3	-5	-95	217	-349	-136	97	-277	-371	332	-1029	104	-342	-822	-417	-940	152	275	-71	-207	-291	10	-50	101	-179	-1059	-182	-684	-660	-13	226	-162	-543	-560
859	1402	346	539	379	-101	129	284	154	271	178	255	275	-159	399	106	167	233	259	335	-151	85	878	654	-195	321	200	759	610	197	98	89	319	-18	256	211	365	264	368	282	165	594	441	304	279	318	573	47	288	164
860	-493	-378	-596	-859	-571	-292	-594	-2603	-697	-1	-691	-201	-1046	-263	-803	-396	-323	-857	-446	-1766	-1047	-212	-819	-1374	-336	-1649	-252	-219	-1989	-1883	-2601	-474	-566	-697	-610	-610	-846	-955	-362	-816	-1784	-1163	-1501	-663	-279	-1027	-1028	-1052	-986
861	7	124	-24	-244	171	184	11	-144	86	-1	59	47	66	202	45	27	-6	-170	67	144	20	27	-23	393	19	-216	3	-166	49	148	289	168	268	597	15	80	211	-67	149	43	217	104	160	497	0	-40	479	-377	-147
862	191	953	448	730	457	275	381	734	564	110	486	809	407	849	446	307	464	649	711	966	888	341	533	156	811	1408	1054	296	964	478	1261	890	601	287	223	432	1492	578	400	386	686	379	769	316	535	637	614	1310	412
863	4	-82	-122	-304	-139	-92	-33	-395	-186	15	-123	62	-159	-187	18	-44	-113	14	-27	-264	-85	-73	25	61	271	-225	-127	-74	-317	201	-404	-315	-245	-11	43	16	232	-16	-64	106	-493	-158	-106	-40	-129	152	-32	-195	92
864	-160	-378	-44	-147	95	-169	-104	-291	-580	-235	-173	-75	-269	-644	-176	-3	-178	-248	-311	-186	-222	-411	-67	-130	-307	-473	-229	-281	-147	-584	-641	-606	-574	-57	-86	-76	-1460	-1006	5	-234	-507	-85	-24	-66	-236	-233	-49	-526	-37
865	-132	-261	-104	-173	69	42	-179	-355	-190	-72	-210	-93	-98	-103	-128	-64	-69	-89	-344	-162	-41	-92	-138	-138	-265	-397	-258	-153	-465	-151	-446	-65	-22	-175	-74	-13	-476	-301	-82	-117	-406	-113	-198	-123	-131	-151	-50	-69	-147
866	-11	-83	-62	91	-19	85	15	90	-98	-44	10	31	18	575	-98	-30	47	-69	-132	49	-74	-34	-25	-88	147	-73	42	122	175	-182	-294	9	26	42	-7	-32	-84	-192	98	-13	-188	-92	-58	-28	125	-29	-14	-53	-79
867	-243	-588	-22	-485	-139	-63	-321	-409	-236	-15	-22	-137	-114	440	-81	-58	-216	-181	-132	-683	-88	-166	-56	-545	-169	-1350	-166	-206	-559	303	-220	-152	-92	-101	15	-145	-539	-226	-285	-146	-812	-51	-548	-391	-88	-167	-229	-862	-391
868	173	157	201	186	-190	295	168	127	143	96	256	92	55	316	169	164	82	193	364	564	470	276	93	253	447	486	278	227	38	341	641	127	194	133	274	314	232	452	242	209	648	167	327	167	355	327	185	590	261
869	-7	-25	22	87	527	57	13	6	10	-3	78	31	-127	-77	20	9	-34	43	15	151	-216	-19	52	77	-76	-486	-268	-5	186	239	-283	-51	105	-2	46	201	-942	-343	-10	95	-154	-10233	180	32	24	-27	-25	-229	106
870	222	802	70	222	527	89	117	395	832	-6	198	524	50	1269	636	78	378	964	863	215	121	382	713	19	1546	928	281	242	531	60	493	884	428	93	-54	87	592	544	242	198	541	145	284	55	515	1315	144	1259	-61
871	-117	-75	-2	-192	0	-81	-113	16	-32	-101	-81	-17	-61	-40	-11	212	-130	-83	-49	141	-213	137	-128	-61	41	-635	52	-45	-559	-110	-131	-126	36	14	-27	18	-635	-913	-104	-212	-420	295	-185	-187	-207	-74	-8	-543	-27
872	250	-442	28	452	-965	-265	-366	-519	-497	207	-100	133	-356	-212	-466	-115	-315	-973	-832	-507	-633	-205	-441	-334	-754	600	160	-309	-997	-459	-1077	-1159	-804	25	-223	34	-1069	-980	-603	-911	-1813	-218	-670	262	-384	-692	-283	-1517	-323
873	223	-341	-93	13	-38	-13	-15	117	-138	0	-105	106	-69	-501	-6	-27	20	-43	-6	-28	-20	-20	14	-61	185	-57	91	-20	-27	-174	-183	-691	-337	53	-3	43	232	-8	-104	-100	295	-154	207	55	-65	960	117	13	-140
874	1352	1475	490	659	285	224	255	164	938	166	697	1291	250	787	1210	84	454	1112	550	673	651	2291	505	733	1282	508	376	500	279	375	1082	1303	686	990	285	369	370	1073	336	405	769	702	428	699	387	2068	701	1055	-54
875	71	-15	84	-39	63	100	239	946	28	90	96	67	181	69	190	7	86	184	153	493	455	34	133	164	25	394	252	319	422	-22	325	7	-180	175	117	150	359	-511	269	114	362	29	-9	184	183	0	128	240	85
876	131	248	119	153	540	55	108	301	325	111	152	134	103	682	696	90	198	976	1928	208	82	69	119	128	189	410	68	117	60	303	409	1316	238	77	43	140	603	435	253	127	285	-47	356	74	129	180	125	131	168
877	324	192	186	-84	578	368	412	483	194	253	367	660	418	909	263	230	621	514	260	821	396	371	506	482	466	635	455	539	844	170	740	185	475	122	93	520	793	863	525	353	474	372	645	88	237	502	350	867	-539
878	1653	2128	2551	843	807	1623	1691	1905	3035	2120	1174	6062	772	5740	1577	2686	3173	1782	2602	807	2012	4007	899	636	3754	1703	3369	2340	1298	637	788	1725	1602	1610	277	1654	2074	1249	2564	887	2563	1319	1372	843	1843	3621	750	1480	896
879	11403	19834	16606	20944	6068	10597	8273	8611	18306	12552	16021	17492	10728	15973	16882	10611	16697	8168	14930	9776	6246	14982	15133	9178	12034	14989	5186	6248	7437	13240	11008	17960	18110	10689	12400	19733	3271	5164	10886	14254	5272	9310	10346	9663	11364	16194	8855	6296	11446
880	301	150	419	276	1201	97	335	637	834	123	282	153	245	428	344	118	402	430	483	141	127	440	254	-3	523	619	487	296	389	-94	777	94	520	167	187	2	1026	192	88	326	691	175	410	414	318	574	88	747	-199
881	26	31	24	130	57	60	2	238	89	69	34	4	-31	30	40	23	17	147	59	-21	-47	0	-21	5	11	63	-85	79	10	15	320	15	119	42	78	194	-105	125	-90	-38	111	27	548	62	54	-1	107	128	-147
882	5	-98	2	72	-101	53	-215	-110	269	6	-227	230	-119	36	193	112	61	51	310	-451	177	218	16	-176	581	298	-117	-237	-49	-212	241	245	154	139	219	-124	-709	-570	-40	8	246	81	-67	101	138	27	-119	-797	340
883	1483	1708	1016	411	374	1783	670	399	1979	364	1255	2156	695	2480	1089	863	1302	2258	1679	930	1376	1284	858	658	1685	1929	448	919	60	615	1965	1315	1036	988	520	1650	-868	-117	1104	1083	396	1238	516	919	897	1976	1217	565	453
884	-84	-152	-168	-310	-158	-169	-366	-838	-242	-61	-269	-165	-205	-290	-139	-213	-225	-63	-154	-151	-266	-103	-289	33	-295	-311	-186	-160	-816	-220	-514	-181	-122	-61	-144	-50	-529	-360	-309	-125	-217	-269	-388	-116	-280	-318	-110	-1030	-525
885	62	40	130	188	196	10	13	-36	308	41	82	444	159	1060	248	41	324	92	412	21	112	208	156	0	646	-57	304	112	268	53	57	146	218	114	-50	-53	-285	-83	237	89	33	104	58	0	103	447	67	134	10
886	-713	-563	-1448	-1876	-1194	-1448	-821	-3223	-758	-874	-1896	-507	-1582	-528	-468	-418	-1196	-924	-841	-2175	-1385	-64	-1061	-2418	-283	-3550	-992	-991	-2559	-4438	-3231	-1927	-969	-669	-845	-1030	-2858	-3487	-736	-1591	-962	-925	-1986	-1212	-876	-901	-1582	-2984	-800
887	5217	8459	2640	3087	1963	2466	3613	2891	14091	5799	3083	10187	2101	12246	15194	5813	11203	3575	6229	2732	2735	9009	6135	1969	5349	4465	3113	2606	1370	1594	2937	13712	8830	3994	5206	1848	1418	1467	3333	8324	2403	4000	3219	2908	4044	7585	3155	1170	2701
888	-43	-62	24	130	-451	1	-11	20	-62	-80	25	-25	-42	-370	-9	-12	-50	-138	-65	-190	-8	-56	-67	-11	-49	50	-239	-107	104	15	-136	-246	-117	-19	82	-25	307	-679	18	81	-91	-55	-101	-25	3	30	5	-61	58
889	-62	-568	-146	99	-184	-86	-53	-214	-454	-54	-101	-153	-50	-849	-83	-130	-203	-164	-193	-7	-296	-428	-66	-94	-218	-479	-212	-84	274	-391	-141	-805	-553	-53	-137	-205	21	-352	-2	-242	-159	-149	-311	-96	-39	-149	-91	-240	-68
890	77	107	53	280	222	-76	115	224	-71	-23	23	46	-47	123	89	58	0	80	-65	232	121	47	213	183	74	311	101	91	197	159	152	74	-219	55	43	57	-254	511	208	468	193	17	180	123	-78	-16	153	162	261
891	1	11	-46	-61	279	-37	-82	-50	16	-53	-6	19	-15	-19	1	20	-3	-11	29	-91	5	0	-57	29	-7	-321	81	40	-301	-117	-267	-61	15	106	-15	0	-275	-150	-8	-144	-237	47	24	-64	11	-3	14	-173	-144
892	3	33	-4	211	-120	-33	-113	-3	3	37	-62	-61	5	-86	-79	21	-41	-60	-5	-239	-65	-22	2	102	-80	-282	-3	2	-32	-167	-189	-74	-17	-50	46	-27	-63	-209	-21	-87	-295	711	-203	-35	9	-71	23	-151	-54
893	53	429	275	327	95	176	79	389	158	6	197	170	213	472	207	129	130	164	221	320	426	71	532	235	200	988	121	168	635	432	546	350	586	228	117	161	328	779	525	92	561	-119	751	680	82	338	328	431	140
894	452	420	603	1095	1798	314	657	885	515	316	646	417	556	650	485	323	514	488	285	884	663	191	551	597	439	2193	720	960	1348	960	1450	744	589	413	504	420	1302	1685	707	1202	1639	786	961	392	788	688	738	2270	632
895	120	367	406	687	419	-30	182	825	31	-65	317	239	247	-54	143	-41	155	329	189	327	550	69	742	326	212	-63	311	536	728	18	861	365	445	161	160	279	338	100	448	100	328	214	1020	177	282	71	385	-69	357
896	7004	22156	16080	14402	4511	9723	6777	5424	15684	18128	12927	12559	11961	14415	16959	15501	13856	7995	13577	4428	2516	12180	12315	7437	10998	10781	3454	4735	3650	16278	3384	16505	16060	6628	18389	10853	4213	5248	5625	17010	3385	15170	7736	7716	8538	15288	7066	2074	13845
897	236	278	259	200	724	68	-91	570	37	289	233	-5	378	399	-56	109	-82	335	373	613	461	129	249	104	486	696	821	490	728	410	777	292	614	312	501	238	-63	75	240	92	575	366	467	353	546	474	240	411	89
898	84	20	-62	282	374	8	0	935	46	-17	139	174	-117	-164	56	40	117	193	62	-172	500	-147	76	33	129	238	-196	10	471	-56	-320	329	-364	191	-74	18	232	259	0	81	270	278	-209	-94	119	212	117	229	-109
899	27	68	-6	37	-38	59	-17	144	-16	22	100	69	-7	0	16	50	26	101	63	3	156	-5	81	-118	74	6	9	-7	71	-125	-84	53	22	67	-54	83	-476	259	96	-125	-130	-70	173	-1	78	22	-2	153	-17
900	104	276	135	254	120	91	-39	63	275	-9	61	266	95	556	145	103	91	245	334	229	449	31	162	104	395	359	203	-40	153	246	588	369	221	109	-11	180	317	427	170	250	188	263	279	115	123	271	141	400	632
901	138	234	337	338	603	165	326	607	290	26	530	213	410	439	192	167	342	569	210	370	1071	129	433	346	338	915	419	375	1271	603	714	545	360	270	254	328	434	645	472	288	778	634	609	509	249	354	440	853	632
902	37	-415	115	332	266	-72	239	-234	-378	-201	173	-4	-370	48	10	4	-92	-101	-124	-246	-287	-326	-104	-266	-163	731	464	217	268	474	-924	-46	-65	-110	-426	6	254	234	101	149	483	-171	512	-255	-48	-103	-105	-405	391
903	-297	605	119	-114	482	-716	204	271	-165	27	-566	-95	575	774	234	61	59	213	978	-2009	-1157	131	755	96	795	-136	206	-850	761	-2065	-898	5	492	-251	-270	-889	-10406	-10907	-400	-683	232	-486	-1212	-805	-357	389	-1089	674	247
904	29	212	146	78	88	175	75	144	65	-67	51	20	175	103	73	50	26	92	145	197	210	-8	57	77	124	321	317	71	389	125	567	127	56	61	-27	150	307	519	133	32	178	36	187	89	82	121	143	375	41
905	-173	-362	-161	-237	-1791	-105	-193	-439	-551	-118	-309	-381	-327	-480	-228	-124	-365	-482	-569	-419	-248	-279	-284	-298	-464	-820	-527	-334	-761	-372	-583	-460	-340	-260	-199	-127	-963	-536	-325	-748	-701	-267	-643	-336	-367	-426	-265	-741	-353
906	4938	9995	4115	4841	1652	5071	5161	2921	12988	7605	10061	12372	5757	13064	18750	8520	12279	13018	17085	3067	6583	12860	5678	6464	16719	6983	5383	3028	4099	6569	5386	14845	13762	7156	7629	4710	2741	4267	5140	4996	5663	5605	5113	7530	5119	12442	9356	4210	8230
907	-38	-397	-119	-71	-101	-89	-6	-268	-481	-82	-45	-90	-31	-1729	-11	-30	-189	-43	-186	-102	-156	-611	-94	79	-88	-85	-94	-30	-147	-129	-289	-614	-1030	157	-152	-157	-338	-326	-168	-204	19	-23	-295	120	-76	-173	161	33	92
908	0	-313	-75	-99	-31	-159	-182	-234	-213	-24	-37	-6	-170	-340	-72	-56	-107	-11	-37	-148	-245	-70	-179	-124	-17	-292	-121	-48	-537	-94	-667	-115	-336	-145	7	-124	-275	-67	-144	-160	-667	-182	0	-98	-131	-110	-195	-167	-147
909	102	274	88	-564	298	127	135	-144	701	5	36	199	162	993	154	73	227	421	282	91	103	97	133	-71	592	950	366	288	701	-170	-131	603	361	71	-27	-36	1048	-8	245	440	140	-68	232	-38	453	431	0	-190	30
910	-70	40	-24	14	-184	37	-22	-167	1	-110	14	-19	-61	27	16	-107	16	-46	34	-155	-68	-15	37	-63	-53	-454	-153	-91	-306	-26	-357	-148	82	13	-23	-53	0	117	-96	-16	-116	-77	49	22	-50	-27	-67	-296	3
911	450	3888	1178	951	7542	826	1152	2858	623	284	1217	994	2288	3550	616	460	405	2310	975	3899	1782	1028	2043	1657	1353	3054	1260	1216	3727	1932	5039	2059	425	714	786	1328	4647	7746	1267	4601	1151	1232	2528	941	2097	1173	1565	2760	903
912	12570	26182	9331	14976	3996	10262	10211	7028	18377	16161	14906	15656	8093	14327	13657	15694	13380	10837	18791	4548	9212	14209	13931	9830	13304	9885	6430	7188	5113	10017	5228	17728	17830	6881	16495	17410	5229	4351	8356	13383	6520	17754	7375	11253	8028	12861	7172	5495	13367
913	70	3	-57	183	-254	-118	-86	90	-9	-46	36	-107	-87	-73	-26	3	-9	-77	-158	-38	62	-3	28	-104	-218	-73	-203	7	16	-307	36	-52	212	-85	-27	-219	-709	-519	-93	-84	145	2	196	155	-56	-13	-144	-442	-54
914	-458	-834	-556	-863	-228	81	-355	-1180	-832	-279	-363	-540	-660	-745	-427	-330	-580	-621	-860	-1018	-562	-364	-871	-690	-364	-1439	-566	-531	-1584	-964	-1471	-781	-502	-475	-183	-593	-1587	-251	-635	-533	-1368	-471	-1250	-590	-528	-654	-708	-1133	-773
915	82	65	90	306	-82	94	308	338	34	74	161	80	364	376	99	136	201	86	125	197	239	-17	106	136	187	-95	383	242	230	72	162	367	59	173	-19	-117	381	192	29	92	-48	-182	352	-11	279	28	229	302	164
916	374	108	33	112	393	146	170	358	71	101	175	209	5	152	211	195	218	245	206	-28	509	128	174	195	389	355	91	66	153	527	162	180	547	296	230	127	-52	-75	173	312	-169	-42	367	397	67	152	201	590	298
917	55	103	99	100	127	85	71	251	-56	-41	54	126	109	102	88	-27	57	340	-161	-70	88	74	295	79	321	-139	261	127	104	-45	-294	-265	-24	99	129	104	116	234	66	-119	266	14	65	-84	-44	184	83	69	109
918	-37	199	-46	-50	165	34	48	13	40	54	5	-4	-109	122	14	7	49	138	68	10	-29	-34	2	5	126	-19	-45	-53	-137	-34	73	110	332	94	66	-16	307	570	58	19	48	10	88	-57	127	79	19	145	10
919	178	764	215	242	514	160	337	607	185	125	288	155	428	325	283	146	412	410	441	426	559	120	417	168	974	635	412	396	471	599	998	430	1168	143	274	265	328	544	205	361	662	137	501	269	376	674	344	800	240
920	-196	-538	-579	-461	-597	-240	-199	-1006	-601	-211	-215	-261	-333	-707	-425	-163	-680	-387	-683	-539	-224	-279	-358	-395	-640	-956	-635	-245	-1151	-664	-719	-932	293	-114	-356	-355	-1069	427	-467	-239	-1049	-340	-596	-453	-380	-616	-332	-657	-195
921	565	5544	1033	1953	1251	701	741	2817	2416	912	1129	1052	1387	2989	1267	480	1556	2452	2614	2908	2187	2106	1822	1236	2263	3016	2138	1001	2855	1716	5869	2394	2557	947	1554	1058	1715	2330	1219	1107	1625	1135	1905	1701	1211	2210	1211	3874	1072
922	101	938	155	409	292	266	175	285	447	59	105	601	122	42	379	44	93	285	5	-17	449	727	325	257	122	34	762	976	224	144	394	91	166	332	301	32	-116	-8	149	97	159	40	-171	462	127	1568	56	862	-10
923	-10	72	-168	-117	3240	-158	-124	-261	-177	-153	-74	-81	-119	-75	-133	-12	-55	80	-136	-215	-183	46	-359	-136	133	50	134	-176	334	-436	-493	6	-100	-243	66	-277	-1206	209	-205	54	-149	-85	-33	-74	-73	-63	-155	-251	182
924	62	187	46	224	146	143	-206	-10	-6	67	20	76	61	382	63	52	49	-43	48	56	130	-14	30	680	13	508	32	148	290	94	73	-61	110	424	3	25	-338	-209	64	187	125	119	0	213	37	54	179	198	893
925	440	1793	-179	95	629	1665	319	543	1376	55	1026	288	66	1791	2181	1784	369	2749	908	557	1814	872	711	1245	9926	518	599	858	1271	656	993	3584	1322	3038	1330	92	-84	2188	1176	2051	285	74	844	2854	118	3616	1559	422	783
926	1768	1382	2711	837	1359	774	1163	2653	1650	461	1421	3526	1734	4249	1323	840	2429	1510	1412	2168	1044	3320	1363	891	3003	2571	4296	2782	2055	759	2601	2217	1263	1555	551	1319	3419	1986	1854	990	2205	1418	2291	1415	1884	3754	1038	2091	323
927	18	30	255	605	133	140	330	623	64	-60	156	-87	386	203	80	89	81	-225	11	479	88	-18	243	140	13	340	428	342	1737	-167	-31	-65	246	74	199	43	836	-536	821	-51	1238	546	1467	338	417	-123	159	268	1821
928	440	155	82	65	622	107	146	335	381	72	117	589	114	1292	261	186	549	337	298	236	298	154	316	112	659	317	428	439	93	330	357	580	248	415	-31	36	169	159	61	312	261	57	298	176	191	1486	88	344	92
929	105	216	119	-1063	-50	-231	204	-375	347	-45	24	166	-69	42	229	160	-24	-135	2	549	657	322	389	-172	147	-232	340	168	663	45	-367	198	313	-14	86	-92	730	410	266	375	101	302	2	-62	389	561	129	198	-429
930	6720	12415	17049	13394	3488	7633	12518	13482	17289	13837	17852	17264	14863	18337	18014	14686	16803	17356	22406	10880	7809	16272	17510	12965	18090	11792	13346	8785	10233	14209	11996	18176	21825	14048	9421	10245	9210	6254	13151	15261	10931	13282	13495	14725	13919	16563	13510	10417	20997
931	205	2410	401	127	18910	487	1331	1918	1727	592	1401	612	1174	2498	1172	693	1047	1695	1746	3271	2578	882	2099	1192	1749	2514	933	1075	2055	1473	3000	2628	1375	1231	540	1257	10491	13732	942	16975	773	1992	2607	1918	1991	2217	1304	5383	237
932	-168	248	-232	282	-635	2698	2044	966	-96	138	-443	-267	-279	1683	22	112	-391	1207	340	356	518	220	295	199	2268	-1799	281	-357	1995	759	-283	-13	-4	99	101	154	2000	-821	-138	141	2079	-338	636	526	691	-310	-95	719	835
933	246	452	610	431	1347	658	344	1472	543	223	369	474	1992	508	494	109	704	306	335	1029	482	137	1025	949	431	2097	245	807	964	1591	1818	808	339	267	133	485	2201	1442	333	492	1770	424	903	504	380	535	734	568	872
934	399	799	443	82	413	295	592	1254	358	230	593	344	828	542	268	324	342	756	636	1219	950	149	733	1075	748	1621	363	894	1731	1610	1607	569	459	407	277	404	1016	217	595	-29	918	422	485	516	524	555	853	767	536
935	81	115	386	160	368	316	59	1388	228	-15	213	186	503	652	207	98	207	285	110	948	352	115	407	363	-15	848	199	485	756	729	840	315	356	170	164	342	-105	645	82	160	662	362	586	506	427	245	-73	419	305
936	237	673	321	41	508	152	62	1006	591	68	515	218	90	275	382	278	526	670	279	1241	642	375	517	272	673	1153	-88	442	438	918	1381	904	486	334	-274	217	1397	50	264	220	193	306	577	357	402	847	447	456	243
937	168	-1	0	128	133	107	199	295	310	71	90	344	157	826	465	204	336	502	417	521	455	61	284	134	941	301	478	181	416	265	68	403	351	208	39	131	232	226	312	253	299	111	293	148	470	482	23	243	309
938	-75	-548	75	-226	-482	-69	-146	83	-153	1	-27	-79	-293	-324	-84	-64	-86	-259	-251	-38	0	-124	-99	-201	-319	-193	-235	45	-142	-227	-225	-485	-278	-170	0	-244	-942	-553	-98	-408	87	-1017	-264	-44	-194	-225	-74	25	-381
939	333	529	126	28	203	275	199	734	424	-59	64	277	396	1188	356	166	330	878	421	1085	674	258	739	348	651	540	543	327	537	383	756	792	261	347	3	392	582	326	200	-2	522	-441	408	181	631	591	105	268	103
940	435	-55	137	-87	-457	247	117	97	455	329	80	425	-151	1135	394	126	306	202	909	341	364	471	232	39	870	651	343	74	-169	-87	78	300	316	202	180	187	243	-469	346	57	178	297	69	235	213	1441	55	-61	85
941	-28	-186	6	-52	-216	-66	-91	-144	-20	-88	-165	-51	-87	-192	-33	-60	-126	-5	-98	-10	-74	-66	-57	-43	-96	-384	-19	117	-263	-83	-157	-171	-141	-94	-133	4	-338	-50	-85	-174	-140	-36	-56	-108	-65	-121	-34	-207	-250
942	4545	5248	4821	3818	3304	2912	2406	2542	3632	5520	5104	3731	2054	5328	4535	3647	4178	2195	4177	2534	3010	6257	5952	3753	6641	9007	3143	3383	3316	2612	1907	7704	5149	3573	6572	3115	3186	2632	3087	4389	3898	5605	2835	4576	2684	6716	4658	2757	5202
943	-1	-279	-108	-162	50	-53	-66	57	46	-3	-126	18	-106	-234	-99	-61	-80	-150	-193	-229	213	-108	-249	-33	-269	-19	-98	33	-76	30	31	-140	317	-42	-58	-97	-232	-310	-221	-122	62	-42	144	-172	76	-62	-91	-358	-72
944	-102	53	-53	-252	146	-171	-119	-848	59	18	116	176	-463	66	-118	-67	-100	335	-155	-155	-876	40	81	-609	-437	-775	-474	-321	-268	-470	210	195	157	-105	176	-427	-95	-578	-344	204	-594	-23	237	187	-162	138	-165	-806	-140
945	102	93	-8	24	38	-18	59	124	279	103	-10	150	-50	211	119	-3	19	251	80	74	316	131	20	-94	196	-98	-209	137	147	-129	31	723	122	-50	58	57	-148	-335	-29	206	193	-167	-160	79	-48	450	165	-72	408
946	-30	58	-4	-282	-305	-53	8	-355	0	-24	-4	43	-125	55	9	-27	-86	138	20	38	56	22	-49	-27	279	-3	42	-68	-142	-30	-173	7	-246	59	-137	-27	222	-662	-160	-2	116	-194	-164	-111	103	16	-52	-167	-182
947	162	-139	104	26	-139	68	-51	-103	35	-6	71	128	-42	51	-11	70	67	86	26	66	301	9	38	-213	175	-12	81	117	60	-197	-5	-57	-41	211	105	-87	434	-637	-133	-92	82	85	-277	-44	22	-48	-82	254	-34
948	185	606	297	409	12251	-66	432	13	-85	10	382	100	18	308	-148	-15	32	106	513	398	198	100	-97	57	167	-50	42	-204	-104	679	304	884	75	47	485	210	3768	6086	-274	3401	149	314	-187	121	26	151	319	842	-34
949	-30	397	-359	-14	108	-18	-68	-513	145	31	-19	67	181	-22	36	-32	-82	-2	-10	123	263	202	-48	96	291	228	153	76	-739	-315	15	-137	2	-42	-7	41	243	318	-290	65	-198	-6	97	-253	-31	121	-68	-422	-268
950	-298	-378	-698	-1069	-6	-374	-186	-1425	-406	-321	-799	-225	-450	-670	-361	-164	-741	-418	-511	-758	-260	-285	-670	-292	-167	-1033	-376	-357	-838	-250	-1597	-1011	-474	-262	125	-305	-603	-662	-381	-214	-483	0	-954	-704	-357	-818	-399	-366	-536
951	1999	-325	370	-312	482	163	-35	402	793	10	-128	1211	-519	-216	-414	-41	-396	83	-347	-271	1264	-4	334	2402	70	-1300	258	741	992	18	-751	70	80	783	62	-134	-645	33	-269	2	-759	-29	-372	1066	89	1799	1649	1377	233
952	-159	-591	-623	-884	-692	-98	-359	-436	8	-131	-580	-237	117	-353	-43	-166	-319	-280	-122	35	-636	-36	79	-439	-752	-1373	442	-485	-849	-1101	-1224	-703	-520	-465	-50	-492	-518	-620	77	-372	-1185	-158	-149	-401	-78	-374	-644	-1254	-762
953	38	310	144	267	355	21	91	566	248	19	228	135	133	293	137	38	137	245	137	535	370	135	343	67	336	321	144	117	317	277	320	250	560	216	172	39	370	125	173	242	372	83	237	220	181	129	143	131	-20
954	27	196	75	41	336	98	157	77	104	-18	119	41	138	99	19	53	22	127	131	327	242	40	76	83	139	260	26	43	306	216	-52	198	185	-9	50	80	285	813	-13	323	120	74	58	49	3	112	76	162	134
955	-9	-65	-130	-246	76	-63	-53	-83	47	38	-139	-102	-2	-255	-107	43	-222	-83	-132	14	79	-153	-188	-92	5	47	-49	-33	-317	56	5	-64	105	-2	-54	-16	-412	192	-152	-68	-203	44	-386	-223	-108	-22	-61	13	158
956	106	403	221	-218	2077	102	-182	-261	186	62	-141	142	383	221	-214	146	218	-167	322	951	515	-281	412	241	-285	-851	-337	79	268	-413	-157	-822	-117	-284	434	127	1842	2473	357	1216	-96	83	126	365	247	-419	349	-775	41
957	-47	-105	-2	142	-31	39	55	33	-88	-39	26	44	-95	25	-21	-103	-39	-173	16	193	103	28	-11	-9	139	-276	-225	-127	120	-231	-115	54	137	-143	39	-62	-317	58	133	54	-24	-6	90	27	93	52	-4	-282	-429
958	125	-177	168	-379	-857	295	-652	-1955	-167	-166	-178	-217	2	-318	-142	-132	-392	-407	-187	-1449	213	-251	-239	-498	-500	-247	-442	-873	-767	-303	-1271	-279	79	-77	74	36	751	980	-613	410	-1538	295	-1079	308	-591	49	-246	-1416	-357
959	-277	-571	-306	-351	-940	-230	-273	-459	-352	-160	-326	-209	-258	-355	-222	-136	-286	-135	-547	-334	-361	-307	-304	-231	-372	-1029	-337	-439	-575	-337	-656	-485	65	-189	-367	-339	-1259	-3705	-309	-1635	-517	-347	-625	-209	-279	-450	-382	-862	-233
960	120	526	521	345	559	333	501	969	479	53	364	384	391	890	326	87	380	742	394	747	639	193	549	342	527	953	45	439	1008	470	1324	451	195	283	46	513	857	930	613	258	899	449	977	497	550	419	140	702	422
961	571	102	-645	-605	1734	144	-239	805	658	346	395	764	1297	1547	229	226	608	1239	685	2140	1302	683	1417	-102	1418	-823	907	779	1638	-174	1628	-222	540	495	238	614	-1979	-2909	144	187	-1837	323	1045	717	917	1049	611	-1063	701
962	51	88	-57	5	-6	-24	77	-305	81	15	-115	45	74	31	103	33	-65	-37	16	285	219	24	12	-106	232	321	-49	66	-76	-121	57	-11	-205	141	176	-18	63	-201	157	-97	-77	-672	-182	25	58	73	-99	156	-195
963	-338	-1394	-521	-986	-1264	-168	-610	-1432	-418	-95	-873	-310	-391	-1016	-481	-130	-795	-508	-552	-525	-695	-486	-725	-67	-533	-1614	-870	-1075	-1748	-949	-1492	-976	-877	-391	-1041	-36	-1683	-771	-611	-468	-720	-614	-1372	-416	-683	-998	-780	-2032	-721
964	171	219	184	314	177	97	157	305	139	50	54	310	226	289	235	26	243	418	99	398	298	117	207	278	441	479	173	247	427	284	730	172	413	37	46	127	539	377	146	304	198	85	124	145	97	294	241	386	271
965	1380	5399	627	925	1175	1391	1613	2217	1896	832	519	598	1947	4295	2112	756	1880	2073	4270	4086	2495	1211	3092	1467	6040	4440	1499	2634	7119	1496	2075	2980	1175	1380	1166	1162	3768	1500	3039	868	4478	1217	3542	985	2358	2472	1104	1783	2470
966	1	-75	-122	128	-787	33	-150	-167	0	-132	-95	7	87	69	-73	27	157	222	-11	148	71	-4	-65	185	236	-232	137	15	-137	-436	-162	71	-175	-67	-270	-36	-486	-259	2	190	-449	-175	-234	-55	-37	-12	-77	-268	-34
967	-51	80	-315	-102	88	-144	-153	-446	-323	48	-188	-125	-149	80	-83	-136	-165	-49	-92	-49	-85	-51	-88	-253	29	0	-26	-258	-745	-258	-599	-66	-164	-163	-266	-43	-688	117	-402	-438	-324	-111	-279	-159	86	-129	64	-218	-109
968	27	77	-51	106	298	23	24	-26	70	45	-9	-6	13	-52	19	98	69	54	30	31	85	66	11	108	-5	63	137	20	-98	140	141	-49	-63	-67	78	11	243	-134	90	24	101	4	110	32	14	341	-4	195	168
969	117	611	166	110	-69	136	202	63	385	66	-11	130	106	387	203	-1	261	179	284	613	568	259	258	561	305	518	464	498	646	-197	751	462	408	351	211	219	730	-8	157	38	256	162	284	497	177	422	185	260	360
970	91	1	188	521	2567	372	528	751	-192	105	-184	557	322	943	-127	104	-176	228	435	976	420	516	199	448	210	489	-189	-485	1046	159	-320	781	-184	-71	563	-9	3715	3294	-13	1929	-87	404	1176	169	-65	287	20	428	577
971	467	722	567	538	737	943	557	744	875	190	915	743	263	1156	570	198	686	340	596	687	636	2139	631	130	687	988	969	462	756	360	1071	688	508	392	199	235	793	1106	523	367	749	364	828	308	410	852	123	582	419
972	324	797	641	177	959	14	375	436	681	64	496	761	335	1238	418	115	416	314	608	370	420	1690	151	367	1014	470	785	669	493	243	446	638	225	652	195	187	444	234	493	459	241	368	404	370	492	926	462	621	41
973	164	181	264	422	438	305	375	654	186	44	234	612	175	1520	304	138	559	225	177	1202	1456	133	241	253	354	1096	920	799	1271	174	667	347	224	212	19	552	1598	938	1043	342	3158	242	514	211	423	347	111	1175	257
974	390	586	237	540	521	134	355	1157	665	109	352	375	242	948	424	150	788	262	511	835	574	217	835	887	718	1265	890	689	646	383	1592	830	650	340	320	316	1291	1131	581	451	232	370	365	372	584	691	632	1318	676
975	220	25	128	-241	165	153	153	187	493	213	141	121	122	957	432	184	352	381	411	260	642	599	166	197	551	816	340	227	164	372	325	591	330	127	297	-18	264	192	667	92	29	134	124	104	451	582	171	181	223
976	39	-67	-84	-9	-127	-47	-197	50	-120	-13	-15	-44	-21	-33	-78	-27	-163	-170	-77	-119	-82	-54	-98	-130	15	-92	-173	43	93	-337	-21	-153	-68	89	-58	-85	-328	-184	96	-81	-522	32	47	-54	-59	-74	408	-109	-17
977	17	35	-33	-214	-50	-37	-133	110	56	-82	2	-58	-29	26	13	6	24	-112	-82	14	85	-8	-3	-255	41	6	9	-28	-301	-220	-204	-70	-97	58	-101	-154	-444	192	-24	-27	-33	-83	-31	-62	-123	64	-152	-67	-61
978	-218	-494	-348	-768	-616	-189	-182	-530	135	-126	-174	-251	-434	-356	-184	-147	-219	-329	-325	-405	-171	164	-328	-381	23	-638	-219	-551	-1211	-451	-646	51	124	-391	-199	-219	-878	-100	194	-402	-957	68	-826	-347	-464	-336	-255	-540	-646
979	48	248	-2	104	-165	-7	-82	114	206	12	137	93	45	218	149	20	89	118	160	169	-5	102	49	166	283	305	144	160	142	-75	210	187	235	-18	7	48	179	-16	130	57	29	85	-112	11	48	211	14	184	-92
980	-29	150	-124	-41	-57	28	-8	-103	-16	-3	-109	122	-29	158	65	-40	0	98	94	-56	-296	207	1	-3	124	-19	-55	-137	5	-3	-215	78	19	-9	82	-50	-211	-511	0	97	-203	-49	-49	-150	-31	223	-150	170	-140
981	492	739	235	366	457	147	1001	553	899	118	470	353	98	1854	886	918	139	563	701	1540	873	360	1131	508	3011	648	831	891	2143	736	1271	1048	852	552	266	210	349	947	1419	617	1204	409	1151	419	1309	1194	258	1237	735
982	97	-107	335	689	730	449	541	784	-42	203	477	102	522	4	83	123	52	418	54	1494	666	-11	358	425	41	645	180	592	1386	861	930	-86	-156	392	105	272	1619	444	760	351	827	372	794	567	762	100	456	960	367
983	4	289	57	112	95	44	77	268	210	-32	48	142	-2	200	98	33	123	54	291	63	-5	97	69	-92	220	92	-9	43	93	75	78	242	307	-55	43	76	179	92	194	13	53	12	2	-8	74	201	53	128	61
984	-129	-234	-292	35	-578	-191	-248	-483	-105	-203	-265	-176	-415	-243	-119	-109	-244	-262	-216	-327	-296	-51	-194	-316	-238	-359	-13	-316	-613	-653	-483	-289	49	-228	-137	-344	-1238	-586	-168	-451	-411	-89	-345	-198	-269	-227	-343	-333	-257
985	-93	56	-146	272	-527	-168	-122	-345	243	-107	-219	111	-58	438	150	56	-51	184	161	-123	-20	-36	160	112	594	-321	-166	-158	279	-869	157	83	-262	87	137	-147	-1884	-335	48	-1096	-285	278	-338	111	-71	275	-250	-319	237
986	23	234	210	437	114	142	75	157	119	71	219	34	375	272	97	-12	218	193	188	370	106	87	208	138	326	457	127	91	624	56	709	287	326	58	0	64	1175	1274	138	334	19	-113	401	164	-29	113	10	517	233
987	190	650	350	467	177	-34	230	100	456	44	274	243	239	760	331	107	400	606	430	148	222	125	293	75	521	791	304	245	723	303	57	648	11	146	430	288	476	704	472	149	328	214	338	208	503	500	364	478	216
988	21	-5	39	3	-127	-5	-13	-20	-30	27	-8	-20	-47	-142	-3	-43	-6	-51	-73	14	17	-30	-80	61	27	9	-85	-5	0	-110	42	-80	7	-63	11	16	232	-352	8	51	-309	-188	-101	-20	-65	-13	-1	30	-113
989	37	-53	-173	63	317	31	-19	-103	16	30	139	105	-223	186	-16	-76	-27	66	-275	-10	-41	95	85	-100	13	254	-49	-22	-268	-3	162	-103	265	-150	101	-48	-518	-268	232	-43	-309	-229	189	216	-99	-104	-38	-568	-75
990	-87	-239	-161	-265	-108	-24	-68	-469	-183	-46	-112	-99	55	-500	-69	-55	-332	-121	-124	-14	-355	-96	-108	-164	-133	-200	-248	-189	-263	-129	-231	-252	-61	-162	-109	-60	-614	-377	-98	-195	-348	-167	-338	-193	-226	-148	-53	-69	6
991	373	1164	392	685	756	405	446	714	984	80	426	463	538	1174	527	347	567	849	873	765	1015	474	716	518	781	1179	808	733	887	1051	1933	1084	864	499	364	785	1344	1458	600	402	681	389	882	579	548	967	668	1676	659
992	9	43	-4	205	152	66	75	0	98	-32	23	49	5	74	24	-3	-19	20	77	74	68	46	111	-102	27	-9	72	51	-65	129	168	100	-58	33	-54	-13	63	251	-64	24	-135	160	128	23	33	71	-2	114	3
993	321	360	283	246	184	334	412	177	947	224	449	1028	114	1614	510	240	856	222	372	38	145	1365	514	110	1425	432	432	240	164	34	315	513	506	354	246	422	656	368	429	321	159	424	228	138	280	1203	191	223	130
994	-56	-253	-259	-87	-285	-95	-146	-519	-230	-83	-215	-169	-221	-435	-181	-98	-293	-173	-140	-229	-358	-105	-281	-225	-106	-489	-203	-245	-443	-129	-714	-270	-445	-71	-246	-203	-645	-578	-288	-195	-304	-49	-316	-406	-147	-224	-137	-475	-96
995	-112	-241	-335	-590	-374	-158	-150	-550	-205	-156	-361	-184	-253	-448	-127	-61	-247	-222	-215	-497	-204	-148	-330	-425	-273	-559	-376	-339	-460	-561	-635	-441	-378	-91	-356	-233	-899	-679	-304	-457	-570	-203	-223	-480	-228	-284	-364	-627	-209
996	15815	10982	9484	14194	4073	14425	9525	9644	16777	18460	18849	19297	12747	14634	18916	18449	22381	12917	22994	6427	9235	16162	11188	10819	10344	13486	12858	12547	5941	12075	7356	22181	15274	12994	14514	10416	6881	5466	9095	10387	6423	11315	6935	12404	7479	16354	13728	9003	14587
997	-3	-154	-86	-44	-31	-23	-57	50	-83	-75	-93	13	-149	-383	14	-83	-190	-23	245	-186	-29	-272	66	3	360	-286	-13	-81	-274	-113	42	-182	-445	31	109	-108	31	-83	-176	13	-169	59	4	-69	20	235	-31	128	-27
998	486	789	816	635	1061	477	781	1583	642	210	973	588	724	1017	528	343	919	528	922	1501	1228	323	473	613	821	2539	1005	1037	1627	1192	1928	1113	386	559	391	577	2074	947	555	108	1180	677	918	531	861	874	801	2508	367
999	33	253	170	125	-228	149	115	281	-113	-144	-29	-176	151	218	106	36	186	34	131	557	74	142	253	261	315	-238	301	-48	498	296	761	386	55	91	-207	50	232	-176	269	43	130	77	322	154	217	-155	-86	767	223
1000	124	330	279	314	298	191	164	476	266	151	242	158	162	365	239	76	401	285	407	377	390	203	354	304	342	1401	461	227	926	413	1129	301	256	210	50	83	846	318	288	209	783	383	347	228	280	276	222	596	357
1001	38	-48	62	52	-196	18	228	157	-60	68	-44	30	5	163	27	13	-21	-86	40	102	198	421	-21	191	350	-31	134	104	115	68	-173	-114	-129	113	152	108	254	167	333	-13	-106	-57	72	-101	146	188	20	279	79
1002	-79	-472	-326	-551	-705	-129	-277	-385	-206	-102	-366	-60	-572	-297	-283	-120	-312	-337	-308	-595	-568	-82	-295	-324	-218	-912	-22	-227	-953	-505	-551	-702	-238	-177	-379	-270	-3038	-880	-213	-410	-590	-484	-288	-477	-357	-230	-325	-697	-68
1003	-184	-355	-337	-844	-622	-231	-288	-620	-255	-110	-309	-219	-516	-199	-269	-67	-310	25	-359	-856	-497	-112	-289	-92	-234	-762	-543	-309	-1266	-797	-504	-130	-97	-194	-58	-184	31	-477	-269	-171	-701	-377	-444	-553	-325	-259	-143	-487	-457
1004	0	6	-33	-104	101	49	-104	-43	11	-57	42	9	-95	9	52	40	-121	-83	-44	-215	-53	-27	32	-39	-90	-130	42	-63	137	-7	26	-58	11	46	-35	-50	243	804	136	108	-261	-109	-60	-71	13	16	-56	-72	92
1005	-6	-92	8	-259	-438	91	-184	-3	-257	-129	-88	-52	-71	-527	-130	-7	-218	40	177	-483	-254	-191	585	-61	-21	-193	75	171	93	-7	-105	-356	-306	-145	58	-64	1100	1626	-165	1651	43	-199	-22	-64	24	-117	65	391	202
1006	-34	-246	-159	18	-127	37	-77	16	-285	46	8	20	63	-620	-41	-12	-68	-14	-132	-91	-74	-164	-94	63	0	-139	9	0	-71	68	-383	-310	-286	73	0	-57	-402	-75	-85	35	82	-130	-101	-5	-11	-154	25	-117	44
1007	152	-68	8	-233	165	107	-217	197	179	-24	-318	-145	103	-118	29	146	-210	-277	-140	-130	-639	-60	341	298	-64	-721	203	493	-235	186	-777	-164	76	220	7	55	-1238	-544	69	119	-444	-145	-225	11	0	669	165	-408	-92
1008	108	885	503	123	807	208	255	402	448	-3	404	263	333	253	290	143	284	355	322	401	198	141	646	255	512	292	419	-10	602	288	567	481	432	103	152	145	370	511	45	288	754	81	562	477	202	480	264	795	367
1009	5413	5528	3208	3065	3336	5084	2881	2609	9607	3244	2835	9665	2123	10162	8354	5533	7710	5153	8692	1706	2397	4640	7809	2790	6479	5549	3343	2455	2006	2490	2811	10020	7987	5909	3064	3203	1767	2129	4961	8517	4522	3012	2302	3738	3525	8280	3419	3152	3357
1010	75	65	44	41	222	27	-88	-16	123	83	-59	76	95	294	149	66	-9	11	-44	-77	296	103	52	-57	110	247	55	22	147	18	68	22	93	81	58	85	-52	-125	205	51	33	59	4	-13	110	341	80	170	-54
1011	290	97	501	456	590	439	237	436	324	133	436	548	761	866	339	283	342	615	227	789	485	284	582	613	516	734	448	557	728	721	714	428	107	343	254	337	1069	855	523	568	1006	494	474	484	458	484	508	643	199
1012	457	-844	561	207	-6589	585	190	-868	229	48	449	478	426	1712	128	716	-172	-447	-607	-14	-526	307	-153	668	-147	-969	-281	-186	383	425	-1670	-627	262	173	-403	563	-4933	-2892	763	-3143	1441	2704	1555	785	440	161	219	-1052	460
1013	729	227	1444	1457	864	3687	2002	5810	2140	746	1518	712	1361	6217	1754	3940	1538	4558	2256	2795	4896	460	4605	700	16562	5123	2125	2394	2258	5000	3252	2157	1683	1988	481	2392	1196	3261	2722	3333	8072	2116	1909	2243	3238	4168	1274	3953	3714
1014	224	-248	328	-966	-1035	-5	-173	177	192	-36	93	252	141	305	189	92	960	106	73	-384	5	137	-456	77	324	-734	383	352	865	-713	-888	245	110	207	-434	32	-1185	-1500	-216	-228	-430	-111	-616	138	-239	239	4	-1027	-195
1015	133	206	-42	9	177	85	124	134	91	89	10	71	-15	440	181	24	163	427	115	-176	-97	8	193	-73	206	336	170	-22	-290	-56	-147	281	354	43	-54	80	158	586	104	228	-96	96	117	42	-13	121	-10	67	-41
1016	738	119	496	310	311	593	6	258	1640	307	528	894	109	884	761	783	217	878	1098	183	85	754	820	344	1339	260	537	398	350	113	136	349	394	552	477	256	476	519	117	1088	986	248	379	348	213	1346	264	72	487
1017	85	-157	-157	-358	-247	-78	-24	-305	5	-88	159	-117	-125	93	88	-116	-135	306	-245	-204	503	-74	-134	-43	143	28	199	145	-109	-258	-178	195	-65	-106	-62	-316	-444	-452	40	13	-430	-38	38	5	24	51	-34	324	-99
1018	-18	-100	-8	-192	50	-43	-62	228	-133	-12	-100	-73	-223	-261	-79	-15	-99	-31	-223	-306	162	-51	-44	77	-129	-381	-85	109	-416	-83	-105	-98	-78	-146	-101	-101	169	58	-138	-258	-256	57	-300	-42	-181	-100	41	22	-192
1019	198	-358	124	-207	-209	23	124	-77	4	-94	183	309	-63	347	208	175	-81	101	-45	197	319	-116	-6	19	135	-38	222	-5	60	121	-331	21	-38	83	-46	127	-74	-268	250	-2	357	64	-155	59	191	323	246	137	123
1020	-103	648	201	332	610	47	-115	16	25	-68	-119	-94	93	-308	20	49	-75	-268	260	239	11	15	16	-296	191	543	-239	-347	482	37	147	-128	-69	61	-223	233	804	1031	106	421	-24	44	126	121	-181	-42	-143	431	-34
1021	449	0	212	134	133	255	339	650	200	48	148	490	242	614	240	132	294	236	197	627	307	108	294	225	143	1115	510	319	169	-7	315	168	62	326	125	272	370	134	290	225	135	207	241	216	305	243	223	333	202
1022	115	-231	164	173	235	-27	-51	466	-270	-60	54	-188	213	-279	-160	3	-130	-8	160	828	310	-87	-62	-7	-23	228	258	-71	175	-398	556	-17	-701	63	-86	97	1069	-41	547	783	188	400	388	42	-129	-212	-49	246	343
1023	-1114	-1941	-2369	-3622	-2980	-1194	-1456	-5790	-2510	-1098	-2794	-1418	-1507	-2715	-1696	-1098	-2937	-2723	-1481	-4086	-2717	-1147	-3049	-1182	-3277	-6023	-3120	-2974	-6067	-3022	-5564	-4938	-3123	-1894	-1565	-552	-4435	-3303	-2009	-1216	-5552	-1379	-4668	-3257	-1895	-2637	-2346	-4680	-3742
1024	2848	7388	3620	4521	915	1893	2366	1368	9200	9564	5576	11106	3420	8933	9532	5986	12266	8469	14161	1988	1719	11894	3225	1698	7661	1821	4112	2335	1337	2912	1245	11595	11930	1967	3726	4074	2456	1307	2375	3339	793	2779	2142	1215	2538	7932	1159	1455	3886
1025	3	0	44	-123	-50	81	42	134	-15	2	60	-37	-90	-153	45	53	155	-31	87	289	171	8	188	-5	63	317	-42	40	153	37	346	-130	-102	18	43	80	0	-586	189	84	87	124	-81	-77	54	133	-8	361	154
1026	97	248	110	-5	-133	57	22	93	7	95	80	93	74	-484	58	52	95	121	67	81	26	62	-37	92	122	238	6	58	82	102	262	6	114	103	43	20	74	-100	149	-46	-24	55	-15	-13	-26	45	52	64	41
1027	-70	-11	-210	-680	-432	-142	-375	-87	-113	-167	-220	-176	-250	-538	-17	-70	-12	57	-116	-620	-301	-293	-90	-53	27	-435	-203	7	-559	-311	-236	-609	-658	21	-117	-110	-751	377	85	-117	-198	-102	-406	-438	-202	-153	-286	-100	-2068
1028	2968	5412	1577	1844	1893	1632	2768	3462	8699	3922	3743	7129	3439	9344	7311	3886	7465	4217	10070	2337	3146	8744	3721	2618	8347	2733	2917	2724	2493	1879	2811	11554	5220	2759	2650	1918	3017	2129	3023	4626	2268	2974	2776	2805	3855	8239	2774	2603	1745
1029	2	-283	39	-173	-6	-42	15	-167	-194	13	6	-32	-151	-155	-14	23	-83	-167	-264	-14	-97	-142	-72	-181	-80	-123	-140	-109	-586	-227	-136	-97	-195	27	46	-23	116	-326	-168	-24	-343	-98	-69	-140	-69	-98	-71	114	3
1030	79	115	186	272	-336	42	39	328	10	25	25	-61	63	-101	20	138	163	-72	-16	493	-150	35	253	138	47	403	52	-56	301	273	283	-84	38	17	-11	85	-508	-184	130	-144	207	128	221	37	-82	-112	59	-235	61
1031	-98	219	-297	-272	-597	-85	-133	-637	-261	-5	-334	-186	37	-163	-200	12	-215	-228	-258	109	44	-17	216	-23	-175	578	-350	-99	16	-334	-541	-235	0	-226	-160	-161	-1587	-855	-16	-315	-183	-289	-668	-387	-310	123	-292	-506	340
1032	5814	14170	9626	8114	4162	6383	5518	5793	14347	9062	10880	10701	6263	13318	14550	9752	10794	8795	13887	7967	6083	12276	7217	7251	11685	11677	5877	4168	3962	9561	4513	12304	14865	4686	7558	7566	5081	3965	6981	6395	3598	7370	8879	5641	6456	12097	6607	4694	7842
1033	-78	-459	-99	179	-343	4	-99	-130	-496	-142	-227	-314	-61	-328	-309	18	-344	-193	-584	218	-82	-245	-90	-185	-330	-270	-347	-22	-427	-132	-583	-353	-404	-146	-27	-27	-486	-419	-146	-340	-299	-79	-257	-123	-155	-334	-95	-674	-48
1034	280	358	532	1031	762	300	572	952	235	118	548	263	588	805	314	143	528	612	647	2312	1101	228	637	599	265	1233	576	595	6275	1340	3084	580	449	308	567	446	1979	377	1315	723	972	334	1573	448	565	252	561	461	573
1035	11	288	-15	99	381	4	17	-46	98	75	-29	86	-7	-9	114	-26	120	49	182	119	-23	102	66	158	252	197	140	20	-49	-356	115	106	183	17	-23	80	-275	108	194	-13	111	4	304	89	-1	207	83	-27	92
1036	202	430	226	360	266	200	264	523	391	115	169	240	261	339	336	216	371	470	769	215	213	135	499	255	819	711	582	94	608	136	719	583	411	185	113	312	645	796	312	476	536	299	381	270	621	375	280	509	247
1037	132	-181	-22	179	82	37	-84	-328	-130	-43	-40	49	5	0	6	27	-48	274	22	162	213	-24	38	-138	-5	-73	-98	-117	235	-144	-278	-37	-42	187	121	175	307	-83	192	73	-232	115	-20	-3	-16	56	-4	439	-72
1038	-90	-43	-77	-104	108	-20	-119	-412	-157	-66	-91	-46	0	-17	-71	-23	-214	228	-208	35	-38	-56	-172	7	72	-406	124	-104	191	-182	-331	-155	-52	-171	-101	48	603	-201	-93	-32	-14	-6	-589	-118	-74	-134	-61	-128	-494
1039	-332	-1097	-951	-656	-794	-417	-2211	-4914	-876	-69	-835	37	-895	152	-390	144	-833	-1216	-1362	-1886	-2824	200	-1203	-1993	-1227	-5374	-1453	-710	-1600	-1830	-4692	4	-364	-300	-430	-318	-1820	-1676	-1059	-876	-1997	-70	-1325	-907	-1290	-161	-1805	-3555	-1395
1040	170	395	232	383	158	66	110	335	276	37	80	412	189	948	416	76	288	190	417	507	361	314	272	168	691	874	566	222	443	-75	383	306	417	302	97	321	973	377	325	217	527	364	535	209	234	423	210	601	0
1041	177	-155	599	886	69	168	441	741	-197	71	-22	374	21	-34	215	272	-124	323	-274	380	148	-165	110	47	122	410	330	35	-575	759	604	692	523	85	371	610	1408	-737	186	65	-914	610	553	22	155	-29	222	-744	37
1042	269	258	288	629	184	218	424	546	285	67	265	288	404	775	145	320	27	291	227	521	296	205	540	-39	683	251	376	173	844	216	141	411	102	42	15	355	328	83	477	-57	444	252	458	237	466	280	213	-2	302
1043	21	-295	-93	-52	-349	-198	-11	412	-215	-22	61	-107	202	-182	-32	-3	-66	11	178	-109	115	-103	17	29	-250	174	-94	10	197	520	-183	31	-238	-47	23	124	-688	-360	-48	-144	101	51	-106	120	177	-217	74	249	79
1044	266	-269	414	614	203	352	432	1120	458	207	344	359	604	579	438	235	286	294	263	994	991	23	572	518	553	1226	681	549	1189	926	1334	590	149	350	309	332	762	402	587	144	1238	366	659	401	599	575	510	1542	993
1045	-108	-397	-75	-512	-298	-108	104	-201	51	-161	-201	24	-66	536	-136	164	-389	101	-46	-141	14	141	106	-255	350	-537	-98	97	-246	163	-341	-85	-122	-42	-414	64	-1206	-737	258	-157	-82	-4	-33	-77	329	62	-117	-979	233
1046	7117	3100	3074	2257	9919	1341	1691	11516	4278	1132	1451	3170	1268	6333	298	818	6705	262	774	2168	1181	10893	4162	1688	1662	2406	6859	12253	4697	3812	1403	1034	1017	3387	2610	2761	2043	5382	4048	1006	2050	1774	1476	1461	2890	12231	1431	5042	1367
1047	420	1087	119	897	2090	295	841	1741	693	194	628	265	1302	920	649	766	2457	554	925	927	938	1206	709	1182	1059	1773	1493	861	2192	1382	1135	2939	580	769	555	626	4838	6447	581	2307	657	6477	1325	667	576	2173	1413	2200	1223
1048	1245	-18	53	117	502	76	-22	345	-30	178	111	69	-2	59	78	26	93	-72	-98	38	254	-39	208	162	-126	232	72	153	180	315	252	201	56	-9	31	36	762	83	2	168	406	-81	442	140	110	100	213	-61	-58
1049	128	122	37	220	-25	152	153	295	652	65	326	281	418	272	81	184	103	352	68	472	118	160	326	251	196	139	127	173	339	417	430	203	11639	179	74	265	550	-251	58	198	62	137	63	104	69	112	282	439	4391
1050	49	214	159	306	146	118	99	301	127	26	144	106	221	118	104	93	47	51	217	88	171	108	176	106	252	473	157	130	120	98	409	390	307	146	93	90	116	662	69	296	338	111	246	113	202	159	117	515	37
1051	-308	-145	-705	-930	-629	-246	-659	-1576	-726	-306	-698	2980	-447	-183	-304	-240	-669	-63	-412	-1276	-713	-127	-400	-526	-159	-1630	-392	-917	-1320	-1051	-1187	-761	-420	-328	-618	-238	-2625	-1752	-213	-674	-1015	-561	-1264	-1119	-389	-547	-685	-1825	-374
1052	-41	-129	-113	-29	-44	-76	-31	-26	-71	-57	5	-163	-15	-269	-17	-10	-157	-109	-244	-179	29	-4	-14	-31	-159	-92	-29	-74	-213	125	-78	-302	-41	9	-180	97	-105	-125	130	-24	-9	-29	-209	27	-26	-10	-74	195	-134
1053	161	58	306	1573	-406	1010	250	1603	230	256	263	228	189	11607	323	80	375	153	273	602	340	196	254	231	307	5870	903	549	400	284	593	280	258	413	156	2641	-63	150	394	89	2602	109	255	484	277	324	279	520	395
1054	1447	6981	1477	1409	9855	374	5640	4361	5900	663	1657	1266	1308	15638	1815	3509	1832	1334	447	1604	10360	12929	20048	1010	3111	3960	8019	22271	1260	4738	3363	13316	8828	4601	8686	825	921	11519	9220	16970	2718	13349	2542	306	1285	19489	5865	9890	10110
1055	351	36	1446	285	546	777	745	942	210	189	393	901	372	1354	492	369	429	219	35	1015	310	530	522	270	799	654	458	327	1074	284	131	-140	136	472	289	379	582	528	971	380	638	409	693	653	1039	615	344	607	116
1056	26	-20	-66	44	-241	36	-19	23	-2	-93	22	99	-37	-199	49	-104	-26	196	63	102	8	-42	34	-106	122	108	140	7	-54	-56	-21	-80	-239	-57	-74	180	-211	-352	-8	-76	-53	34	65	-16	74	-100	-76	-128	113
1057	495	-72	561	416	-114	156	304	634	-143	50	-21	392	642	-193	-10	61	340	202	-58	-31	242	609	44	391	-49	69	474	219	109	353	5	-218	-259	199	356	261	-84	-377	-37	-310	527	186	85	274	52	888	113	25	-61
1058	-18	75	17	-119	-31	89	66	46	12	32	-34	-9	-98	75	-26	33	27	-77	79	70	-133	10	43	-126	-63	165	19	107	169	11	63	63	194	34	-97	99	74	326	-29	239	53	-89	99	93	1	-11	32	58	17
1059	116	-1077	199	-299	6526	-210	173	275	-1141	-178	-161	-730	-476	-1360	-496	-150	-964	-924	-1212	-95	14	-676	299	-320	-994	-1649	-553	-472	405	497	-756	-2154	-596	-335	-117	219	-1386	4166	-181	2359	-691	-282	-875	-389	-475	-640	-568	-1895	395
1060	23	231	-11	-198	266	73	55	-16	25	11	-57	124	23	111	48	-9	39	138	165	-42	156	-1	188	142	185	-69	281	22	93	-246	425	181	109	-63	-187	131	465	33	130	103	111	49	130	179	9	197	-23	159	192
1061	486	574	119	300	559	152	148	137	446	237	95	456	181	712	356	121	368	465	498	645	550	342	177	15	529	19	406	444	416	-349	919	547	313	267	78	256	709	662	512	312	706	261	302	362	413	435	325	806	51
1062	3594	851	3203	2194	1423	2978	3776	5924	3005	1362	5830	2853	3484	8092	2573	2775	4246	3053	2893	8242	4905	3315	3535	2843	4687	6890	4666	4824	7569	2513	6778	5150	2241	2964	806	2526	4478	3781	7312	2435	8275	1838	8224	3182	6801	4315	3184	6411	2876
1063	428	789	306	600	1105	490	708	1328	243	359	842	656	1009	221	573	441	639	771	799	1516	1104	-50	952	925	1063	2380	1083	940	1408	1032	2270	1245	194	318	407	494	1153	2137	816	19	1451	467	968	739	766	1048	1077	1987	742
1064	104	90	-48	-33	-76	23	162	144	-72	-36	-76	97	-7	-105	-43	-56	-20	-109	-29	-45	-121	-7	138	-79	25	-479	6	163	-137	-284	-194	97	2	-43	-50	-48	-179	67	29	16	-401	-111	-18	62	-24	216	20	-33	106
1065	76	362	86	-42	254	113	99	379	129	101	89	117	165	192	148	38	202	213	231	317	148	135	96	189	317	247	261	275	169	-246	378	327	197	-13	258	127	84	-125	165	57	-19	3741	336	248	228	280	207	89	226
1066	20	398	8	37	146	68	8	144	72	-71	-19	34	87	311	44	16	154	228	170	-66	23	38	244	75	124	403	49	33	49	-239	210	160	269	171	46	-9	-105	-159	90	10	-164	81	185	132	44	127	62	55	-271
1067	-64	-177	4	-149	-44	-20	-119	-6	-183	-161	-126	-65	-63	-304	-141	-52	-135	-138	-359	-176	-71	14	-145	-134	-352	-464	-216	5	-252	-182	-493	258	164	-109	-31	-182	275	-83	-184	-155	-290	10	-243	-74	-187	16	-170	-321	-144
1068	5160	2043	3607	2360	4085	1302	2080	11047	3660	838	1716	4197	839	8154	1944	1126	8488	759	942	1868	2391	14636	9623	2503	4896	1090	11624	21857	2482	3759	6505	2170	1334	7265	3241	2415	1196	2884	3498	427	2902	3012	1444	1615	3894	14043	3058	5098	1910
1069	117	298	224	157	1112	89	113	791	33	19	174	111	596	573	34	227	199	129	409	490	482	25	533	197	768	413	147	350	553	440	399	625	410	247	-70	348	-105	-134	186	247	328	308	401	211	436	163	323	299	-30
1070	842	1981	2509	2123	15574	1199	972	4451	2160	569	2228	1388	839	2480	1058	1069	1324	1646	2311	1339	1764	784	757	1346	1453	2867	1591	1586	2460	2471	4314	3398	1992	1527	2567	630	21374	34306	2420	5366	1252	1315	3169	2405	1367	1245	1116	2413	2237
1071	117	502	57	216	330	121	73	405	417	47	95	197	50	665	308	130	219	335	416	313	458	179	294	259	340	340	422	163	476	208	667	424	315	122	105	224	391	8	253	195	454	70	288	145	211	378	232	330	24
1072	748	1763	905	186	686	372	634	992	1679	209	1053	1743	301	1969	746	432	1129	2105	1014	789	1047	1141	876	460	3318	594	1637	1410	898	303	919	1031	1180	315	250	388	1376	1291	547	500	638	407	801	340	586	1276	592	1254	240
1073	-19	556	-99	-74	82	10	4	-157	185	-23	-41	94	-122	84	90	-75	29	-121	402	-264	-26	364	-317	-112	242	705	415	-268	5	341	-57	-43	303	-175	0	-80	1217	-335	40	302	-91	-122	110	-157	-37	276	41	475	182
1074	5430	1756	3875	1125	2586	2303	1647	4236	2784	1123	3360	2553	1894	2581	1599	1647	2433	967	1479	1854	2767	3382	2840	1991	1902	3464	2540	2637	2082	2764	730	2343	2087	2535	1424	2498	2223	2632	1609	1529	1480	1675	1614	3440	1509	5343	3229	3527	1969
1075	-51	-150	-106	-153	-19	-62	-106	-154	-183	-59	-81	-68	-34	-242	-89	-73	-142	-46	-102	-215	-124	-81	-181	-79	55	-394	-45	-194	-49	-106	-446	-97	-143	3	-7	-11	-95	-544	-170	40	-222	-32	-58	-84	-63	-82	-105	-447	-199
1076	959	1161	812	598	794	204	466	3619	1132	210	302	584	269	1197	391	192	887	323	655	1251	624	1170	1304	504	1164	794	1450	1431	2071	839	1198	1028	938	392	638	411	508	871	960	408	324	492	535	318	1035	3430	516	1380	707
1077	1440	698	603	844	362	1483	1138	905	1158	968	876	1500	959	1422	1024	1878	1108	1470	1881	1138	1604	709	1163	1928	1203	963	1401	1658	1890	1123	1718	1444	847	1490	669	892	1259	-25	1435	753	1339	921	1099	1174	1226	1584	1871	1707	1756
1078	740	1578	1748	988	1042	732	803	892	1856	804	1410	3144	969	2968	1382	884	1675	1146	2037	810	911	2903	1097	1058	3143	1859	1362	830	948	983	1129	2066	1072	1126	622	1095	1111	813	848	737	536	925	769	744	655	2808	846	1052	481
1079	-137	-346	-408	-517	-622	-216	-290	-681	-370	-149	-239	-118	-562	-421	-305	-140	-394	-158	-161	-440	-210	-174	-483	-500	-259	-1090	-157	-383	-663	-994	-903	-354	-711	-196	-199	-281	-868	-620	-344	-258	-590	-314	-230	-402	-256	-170	-428	-685	-422
1080	-2	232	303	-14	-171	60	37	-36	177	66	12	182	53	242	-41	-41	-62	54	96	98	198	2439	62	-146	220	44	183	449	142	22	-47	80	52	-2	191	62	-571	285	-34	190	19	134	121	-170	9	1517	52	114	-405
1081	106	214	328	401	343	95	230	0	290	58	7	591	-29	1250	250	56	289	381	222	24	201	1228	74	-37	512	28	471	160	-10	-75	-325	258	117	274	23	90	328	58	240	65	203	199	250	37	209	274	49	61	-10
1082	9398	11914	8128	10983	2795	6201	9976	8541	11592	3876	10175	12521	15441	13909	10498	11717	8336	10857	8151	7865	7625	9274	12639	10631	11350	18263	7704	10191	3157	9090	7225	12509	8355	10830	6008	5741	4298	4560	7632	6653	6336	7893	6921	9345	7013	13142	10948	8905	12299
1083	201	487	277	82	-133	131	202	-157	228	109	442	229	218	91	283	189	185	320	353	236	458	154	901	73	317	295	245	270	109	-110	194	245	-32	513	270	140	815	285	168	10	-217	287	155	198	166	341	265	257	151
1084	269	1221	678	985	578	50	139	1056	745	313	682	169	642	1027	511	232	711	670	769	937	799	191	783	822	443	1636	563	715	1079	930	2427	1292	703	858	414	399	1535	1551	832	881	1397	544	1029	665	503	926	595	1542	230
1085	309	325	434	424	324	11	339	452	440	232	183	710	197	189	154	121	534	176	351	193	426	604	336	172	553	390	1499	1418	427	182	556	259	298	310	164	180	148	1483	298	57	116	351	519	766	524	3638	167	702	364
1086	577	1795	883	521	1633	603	952	962	770	430	863	1089	551	1314	799	458	1411	1504	1599	969	988	356	922	464	1648	2116	1165	738	898	991	3158	2280	811	954	395	811	2350	2951	891	1545	551	724	1180	1262	771	1879	986	2178	639
1087	54	145	130	272	-355	281	166	97	104	86	114	233	159	698	115	141	325	132	227	133	174	553	72	156	238	333	219	166	5	178	236	156	143	98	3	53	254	469	152	46	111	113	512	138	97	217	76	58	27
1088	38	130	-13	7	-209	62	79	-53	65	75	42	27	2	53	48	41	78	115	105	-81	-74	3	52	-47	98	82	3	40	-230	132	152	16	65	-15	90	18	31	159	-29	-40	261	21	119	-3	41	84	74	95	58
1089	483	134	-44	-143	-158	56	22	144	181	-10	45	183	53	497	166	296	-65	164	-115	236	358	203	404	-199	275	-209	330	564	-411	-189	-625	-67	178	252	-180	127	-158	-150	18	209	328	0	79	162	252	210	-65	181	17
1090	6494	5174	10320	5654	2611	12054	14154	13958	6418	3475	6167	8868	10230	10184	7478	7727	9382	4679	5218	9931	5991	9529	7055	7623	9582	13953	5464	19498	13702	7860	6689	6120	4343	7171	3429	8847	4965	4845	15409	3605	13591	15262	16284	4759	12842	7098	6440	9353	9055
1091	-51	107	-288	-18	171	121	95	-30	218	-61	159	108	245	384	43	9	24	216	-204	162	124	-66	165	270	161	-387	137	125	-137	816	909	-69	-95	326	54	337	317	888	-45	299	-512	145	24	-45	307	12	73	711	-219
1092	688	78	503	-573	216	391	19	164	276	224	-87	830	-53	-60	13	-32	232	-57	-26	-151	76	350	770	353	139	-222	255	436	580	-573	-110	-22	276	272	-27	99	-391	-50	354	-38	-353	267	158	2177	-93	1091	32	44	391
1093	47	41	39	5	-38	-39	11	67	-17	-41	-59	54	-117	-533	3	27	19	60	91	-105	-38	-139	93	-88	47	47	-75	-43	-328	-53	36	-52	-28	-15	-3	-46	127	-461	-21	-2	72	-100	-139	-33	1	96	56	-5	-233
1094	299	367	399	394	781	429	299	1157	389	288	343	286	559	154	330	196	218	476	412	881	888	111	376	373	740	953	487	544	1792	846	1187	334	317	524	426	476	1100	1408	771	546	1504	297	1135	621	625	410	368	509	501
1095	86	172	403	69	-120	-11	91	291	204	238	53	609	229	3222	371	90	1046	257	422	274	358	2356	34	106	1745	1134	1555	235	285	-26	273	645	404	388	117	143	825	41	405	65	638	27	171	226	502	919	235	473	-20
1096	242	367	388	26	673	144	182	318	119	39	237	298	146	655	283	300	247	407	635	250	219	728	267	140	874	476	327	204	-43	201	530	792	505	192	70	138	158	318	304	263	43	199	126	98	162	762	119	176	144
1097	51	122	66	171	76	17	62	40	194	-1	16	29	-29	-60	72	46	32	-5	229	21	165	8	2	0	80	-6	91	120	230	110	336	45	-52	13	31	-73	561	134	-37	209	67	70	144	-25	43	121	104	89	27
1098	200	-169	104	314	482	36	-117	147	132	-68	10	139	-301	-460	64	35	6	-28	-140	-172	239	46	11	-11	-269	-44	-36	145	-180	30	136	-397	-489	15	-46	432	42	544	96	136	154	74	11	11	-11	-37	89	179	-171
1099	171	120	226	-3	-12	-5	117	83	210	-8	93	486	-101	269	205	63	120	69	115	91	224	314	165	67	181	174	170	145	274	-26	204	189	105	119	-50	76	179	528	176	97	-183	66	-20	81	13	341	105	137	3
1100	101	6	-184	-183	-457	-71	-6	-60	-28	-27	-55	278	-93	-576	6	-27	-23	-63	-24	-17	-103	-150	2	-85	145	-127	265	40	-21	-83	-215	-186	-202	49	23	-99	-476	-167	-90	-255	-222	-171	-228	-5	-31	9	-11	64	61
1101	536	1592	279	69	400	55	321	174	1233	223	89	605	31	719	50	140	320	173	98	521	710	2505	1752	35	360	168	1398	3202	246	224	578	539	530	405	998	18	148	352	501	234	14	374	462	79	209	4062	231	848	319
1102	545	227	683	521	832	1209	958	446	1189	289	526	2109	466	3009	734	615	1096	652	1424	708	485	1017	1315	773	943	-50	2190	1400	893	584	819	1487	465	972	301	596	592	184	1366	587	43	334	1180	634	451	1873	344	159	415
1103	18	-15	-352	-314	-1899	-334	-19	660	-236	-80	-265	-423	-183	57	-28	26	-97	-225	-272	-56	133	-23	-153	-498	-153	-921	212	255	-54	-846	-704	-406	870	94	215	-64	-1344	-326	106	-500	-628	237	-492	-86	-131	276	-288	627	-72
1104	77	-388	-70	-312	438	-108	-226	-456	-199	-66	-187	298	197	33	-30	-81	-242	-219	-702	-493	-224	-77	10	-302	-122	-1265	-255	-183	-465	-489	-425	-385	-93	-78	-58	-69	-455	-1727	16	-163	-304	-164	-241	-265	-63	132	-179	-800	-161
1105	293	390	97	63	69	137	137	6	292	27	178	572	-13	75	337	24	216	1242	325	-77	236	-84	153	-69	1794	441	671	347	-16	-41	-47	379	110	79	109	136	285	897	200	220	9	-19	4	198	125	810	167	330	24
1106	-18	199	-836	-304	413	-28	-106	-459	10	20	-119	-81	-61	-124	-27	60	-164	51	255	440	88	-234	43	-114	51	-235	58	84	87	-303	-231	-206	-361	-74	-19	-18	148	-25	272	106	87	-207	-124	-160	151	-287	44	-338	68
1107	19	8	6	24	-31	104	68	57	-17	85	11	-17	-31	-67	-44	-24	-9	-14	-31	45	23	5	8	-142	11	-31	-9	20	126	129	-126	-58	-17	-2	-54	-13	285	-142	2	48	-106	-68	-117	71	28	-41	2	-2	-68
1108	120	295	117	127	101	178	130	268	248	117	117	270	-34	293	183	41	226	127	374	285	201	197	94	130	202	222	134	531	279	243	278	176	275	151	58	69	518	117	280	234	198	34	270	220	307	847	182	478	61
1109	1560	2331	199	158	-495	419	372	-234	1478	1113	-752	2671	-117	671	104	16	493	707	-39	-1029	577	1509	2031	296	449	788	2328	4520	1381	18	1339	442	1285	-51	4501	-110	-1969	-863	1563	-78	-1068	1382	-670	-28	503	10661	-689	383	1171
1110	2266	1966	1848	844	1874	2780	1112	1365	2154	575	1969	4480	884	6648	1893	538	1625	1322	1643	2238	2510	1985	901	824	3570	4831	3297	1747	1781	136	2149	1593	1608	2542	434	628	1069	1743	2970	1357	3467	689	3456	2529	2549	3504	1873	3510	515
1111	2683	690	224	190	2116	202	119	265	957	123	200	243	21	482	275	95	360	297	447	236	139	3220	674	245	878	362	432	707	21	493	1035	537	218	1	622	106	1206	1768	194	304	101	51	625	108	198	979	165	568	278
1112	-296	1646	727	-573	-718	-127	-330	-1714	402	391	-1738	1227	-356	1176	-418	-50	830	1034	-627	-1798	-1385	916	-623	-278	577	-1284	-206	-1119	-1841	-2016	1119	397	-315	73	-649	159	-698	-1265	-253	-680	-1968	-1058	-1361	-975	-224	250	-2099	-1562	-701
1113	1259	1386	723	310	1207	184	359	1452	3650	189	1240	1502	207	790	2210	206	1368	800	1270	712	707	3223	1097	563	3324	251	1024	991	597	-11	478	3596	1187	1340	1722	187	-21	503	576	263	440	460	503	1708	502	6075	1268	741	666
1114	-37	152	490	-18	235	171	321	181	372	422	205	924	157	475	574	146	225	228	-102	595	2566	491	181	591	360	1309	333	434	-82	91	115	280	62	435	144	80	508	955	170	225	585	205	72	489	116	593	626	-151	243
1115	851	202	346	-24	1486	259	412	603	-152	-17	297	304	330	410	157	64	38	444	402	807	313	332	422	486	443	645	6	250	498	326	930	-289	-256	294	-46	46	1185	1777	373	1031	565	312	740	577	436	670	307	741	164
1116	194	77	124	76	108	82	102	157	372	-19	96	388	-7	442	369	90	163	271	192	190	313	258	194	9	470	187	36	252	115	72	257	311	194	85	-54	-99	-63	16	21	70	333	-104	261	116	99	455	46	25	-3
1117	636	623	1255	1132	1645	234	1032	5340	875	190	643	714	463	1591	282	400	1281	673	374	1152	1690	709	1043	996	-61	2539	1188	3232	2899	998	1734	1005	228	577	865	993	2244	2783	1598	217	2713	745	988	372	1015	2884	846	1371	1450
1118	391	191	357	190	101	237	270	583	51	90	274	249	338	542	136	78	466	285	150	349	541	209	240	421	330	657	527	868	597	497	872	161	28	288	-58	110	1058	150	362	81	914	164	555	362	526	391	344	641	374
1119	784	1304	1297	568	196	1187	1161	301	1135	237	568	2877	745	2680	1115	1356	2086	1019	1035	641	595	3594	471	314	2978	1271	1096	973	274	-83	94	622	356	1345	387	1014	910	243	1721	710	406	839	1345	321	852	2048	286	369	694
1120	3898	3332	2657	1938	1982	3331	4022	6129	2173	1666	2020	3495	2080	11891	3414	1793	8874	2183	1508	10516	8184	5723	3667	2657	6064	12412	6041	4679	5831	2107	10010	3835	1765	2575	1186	2537	6553	6547	6082	1932	12038	2562	7447	2820	7305	5651	2983	6710	1515
1121	309	147	150	-99	146	62	-126	-16	288	-62	59	457	-7	-9	104	83	-17	202	-46	-317	-50	16	104	-35	709	-63	-72	-5	-295	-334	-320	120	96	14	164	332	0	226	-104	389	48	-64	-248	-142	-78	303	-4	-176	-144
1122	63	-93	-110	-85	127	14	-37	-33	79	-46	-201	16	0	74	-11	61	39	-43	-2	59	118	33	-58	-1	-133	-225	150	-48	175	-372	-173	93	-160	54	58	-36	-529	-293	-229	-84	-29	-40	-194	-1	-191	12	83	55	-164
1123	-24	-16	37	5	-381	50	-46	-90	24	10	-26	2	15	-58	1	-3	-41	-14	5	158	-44	5	-89	83	25	-88	-72	35	-98	-60	-68	-21	-49	-33	-43	-2	307	50	29	-46	-295	10	-169	-45	-59	19	58	-405	30
1124	109	600	-48	-106	1131	-18	-137	-26	17	-112	-30	75	237	388	-353	-10	-147	17	249	-109	349	97	-67	348	116	-985	-222	-245	-838	-455	131	322	296	58	-485	600	-3440	-343	-410	-1012	-1136	-66	-690	-84	-288	274	-265	-218	-457
1125	612	2231	621	1471	305	195	299	1573	2437	229	559	2519	729	4610	1660	824	1952	710	1111	253	1480	4351	1330	474	1280	1395	2884	1847	1260	-303	257	1174	827	1984	563	32	2699	3127	1027	2925	623	409	848	1290	668	1716	1455	674	1017
1126	221	613	516	618	641	120	486	1174	349	69	279	236	263	1213	425	132	496	207	493	1029	793	604	526	342	565	444	759	689	1057	144	788	545	681	134	344	104	656	176	920	283	996	464	740	387	543	515	304	671	298
1127	4059	4110	7629	3674	3603	3678	3984	7930	3248	1037	4294	4084	2696	10567	2192	1273	4367	508	601	5894	4280	6377	2364	1900	1264	6932	2593	2021	3496	1196	3284	2686	1879	2226	1189	2794	158	3269	4475	1025	3632	3651	4964	2613	3156	4695	2690	2183	1701
1128	25	271	122	-157	-311	-73	-22	-654	516	78	233	211	636	128	-266	163	58	517	182	715	796	235	574	569	19	483	42	-74	482	-144	856	681	105	-143	-289	591	-1947	1165	74	-73	570	-289	381	-150	503	171	452	867	96
1129	21	33	11	188	317	5	-75	0	24	-20	30	83	98	9	41	-21	29	20	30	130	23	-17	52	59	143	146	62	81	142	178	-21	190	38	59	78	-43	116	176	93	-57	-43	-137	282	42	-46	398	86	81	37
1130	111	553	279	173	381	336	175	164	648	143	29	1265	103	1973	610	426	554	609	1083	352	106	1211	135	-3	577	206	648	281	378	-106	5	921	383	443	305	221	1153	1031	669	761	-77	257	322	11	322	1544	37	557	61
1131	341	372	28	149	31	18	135	-13	247	10	18	513	162	1244	375	69	496	127	94	172	384	954	195	191	569	381	406	334	213	148	131	156	48	67	-7	67	201	285	269	51	193	263	128	82	185	356	44	226	-30
1132	5954	6959	6090	9946	7714	5128	4195	7031	9925	8368	6456	13541	5978	12933	9065	6615	10113	11088	13591	9314	9440	12383	7943	3526	15979	14341	7262	7651	6314	3444	8812	10122	9932	3753	3331	6836	5917	9314	8070	6618	5891	6040	4716	4462	7661	12107	3725	11523	4305
1133	327	802	335	743	177	266	412	13	557	72	398	344	572	824	316	132	364	545	563	994	760	412	449	320	555	1074	451	746	827	603	993	675	657	334	598	134	275	871	565	247	193	494	345	463	410	519	420	873	642
1134	555	124	-13	41	152	73	-13	-23	-65	-75	9	12	-34	27	-17	21	0	-72	-7	116	133	13	-84	-21	-72	-143	39	112	279	34	-10	-43	29	59	66	0	179	394	21	-32	29	21	74	35	20	90	-8	167	103
1135	241	108	13	229	381	395	135	93	426	76	152	437	143	293	603	161	189	158	797	250	227	304	119	122	228	451	268	176	509	387	57	358	130	185	-50	117	688	234	106	740	145	130	117	172	159	655	182	288	127
1136	-102	393	-636	-446	-959	-614	-277	-382	-198	-232	-832	-384	-791	-103	-308	38	90	-791	-552	-631	-2	-99	66	-860	-693	-2994	-821	-84	-909	-1146	-2495	-934	400	-405	-352	-307	995	796	-515	740	-1837	-284	-176	-435	-453	-586	-555	-1626	-395
1137	-48	75	-15	24	-44	-56	-102	-30	-44	-18	10	11	26	-96	-58	15	-41	-34	-139	250	-14	-11	51	-193	112	-111	-173	102	71	-170	-68	-40	-80	-19	-23	-108	-137	-226	-130	0	-43	-81	24	-33	-103	-60	16	-123	-13
1138	234	192	161	-5	813	5	-6	1184	86	33	-282	132	-87	145	40	-80	129	69	6	-24	65	811	-58	37	27	-3	147	91	147	-193	-36	77	8	138	183	73	-179	486	312	-174	-517	19	-246	20	20	1643	79	-78	-140
1139	-53	-115	-102	-50	50	91	51	110	412	-43	82	-145	135	128	201	176	126	25	-5	-88	233	28	459	185	370	-85	22	-250	208	273	-110	197	364	71	-183	-73	264	-301	101	57	928	-66	-11	233	179	111	123	-67	343
1140	-8	595	70	-5	432	49	91	107	97	-11	115	113	37	151	675	36	54	153	140	-59	716	160	61	164	216	222	176	304	230	-34	147	97	317	259	97	-50	201	570	210	345	328	49	142	27	256	754	104	414	75
1141	26	-110	-73	-248	-25	-1	-31	-114	-51	-47	-29	-29	71	-141	-8	-9	-101	-40	-17	-24	-74	-80	-17	3	-53	-60	-3	30	142	-30	68	-95	-129	65	-93	-134	-148	-25	-50	-106	106	-21	-266	-99	37	-44	59	83	151
1142	-62	243	-208	-104	635	-105	-71	-372	-91	-125	-206	-116	-354	-257	-55	-50	-254	-138	-136	-102	-65	-44	-372	-350	-169	-444	-412	-378	-378	-664	-683	-741	-75	-45	148	-309	-105	142	104	323	-251	237	-160	-220	-264	-555	-117	-72	30
1143	-1	-25	-126	-205	-127	5	-22	87	-22	47	36	75	-90	105	9	-47	0	-158	-48	-95	62	12	38	-11	68	-212	-130	-10	-301	-702	-36	-165	-100	22	-234	-92	-63	-477	61	8	280	149	-162	-211	52	29	-10	-484	123
1144	1312	688	809	786	3075	1223	3178	2274	529	769	422	1103	1502	6715	1309	583	1195	1343	833	8186	2696	1714	1254	1408	1465	3575	3984	3679	4055	455	4513	1308	386	946	223	1432	7738	3714	3247	903	4725	659	3113	929	3379	704	1314	4652	323
1145	974	1850	978	828	984	632	1089	1110	2046	639	1236	1442	551	4004	1514	652	2041	854	1619	1625	1000	2555	1429	569	2814	2663	1830	835	1457	755	1649	1295	952	1220	688	279	1175	855	1433	655	1871	895	1417	766	977	1966	695	1962	508
1146	232	363	173	-121	1512	437	170	298	106	12	114	-39	375	-104	154	113	-24	112	142	475	230	-50	93	561	-57	492	78	263	772	679	436	6	11	39	62	152	264	1198	424	269	609	190	259	55	522	0	146	473	271
1147	443	952	1297	508	997	413	854	2465	801	231	562	894	1467	2571	644	247	2944	1071	544	2400	781	1694	1216	1150	1010	3550	717	1431	1233	759	972	379	-1	842	352	566	1662	1400	675	936	1296	1142	605	499	648	1743	1031	1254	316
1148	-34	-21	26	-114	-69	20	24	-90	9	8	-37	-27	117	-25	-17	16	18	-14	-10	123	71	-48	-14	98	-41	276	-6	-102	-104	113	-126	6	-48	-67	-43	87	-10	-326	74	-51	96	-109	203	-13	-26	84	-31	-72	-48
1149	8	60	37	-54	-69	-36	46	97	-80	40	12	16	-37	-257	40	15	59	-83	62	3	-38	-87	-7	-1	-5	219	65	-38	-38	-79	89	-51	90	-66	11	-18	137	-385	74	-8	-512	66	-112	0	-20	100	56	285	-68
1150	150	-264	-28	-119	-158	69	-33	-40	17	38	171	190	-74	542	148	-9	253	-80	-69	137	-109	268	23	-195	29	-343	419	-84	-553	-208	-57	-195	-181	69	-31	108	232	-1006	133	174	-362	17	239	-148	-9	306	-86	-271	-51
1151	-90	-119	-264	82	-31	-192	59	-117	106	-82	-245	78	-183	-101	84	-27	-171	95	194	-380	-168	-32	-83	-241	-110	92	-330	102	131	-41	-63	129	-285	-23	-113	48	497	176	-32	190	53	-44	11	10	-357	59	-107	-19	82
1152	115	390	6	155	743	195	157	117	429	31	141	162	372	510	188	78	67	164	154	296	526	119	170	174	269	298	271	390	482	159	814	673	134	93	144	335	1079	972	96	214	386	186	465	225	290	188	162	590	161
1153	52	206	150	117	305	105	119	-6	126	111	172	99	39	151	28	46	151	2	203	260	242	20	78	9	139	184	134	53	257	186	189	189	28	138	11	55	889	184	-88	209	164	124	381	194	82	108	88	363	89
1154	1381	234	1885	242	6119	1452	1929	1747	1966	159	910	3653	1238	8544	1507	1209	3392	2446	1901	782	737	5178	1306	779	3354	340	2341	1129	1216	774	1371	2727	1900	2185	58	778	3048	1693	1852	2636	609	1169	1451	885	1406	3785	425	159	178
1155	97	72	17	48	317	92	73	194	177	-10	50	298	157	534	158	46	264	179	223	98	260	93	130	-92	317	298	-49	186	142	132	273	141	168	79	78	18	455	343	37	152	256	89	205	138	116	247	20	221	13
1156	207	355	184	183	88	194	128	40	195	107	182	317	-21	424	204	72	150	722	260	250	26	198	126	189	577	715	386	237	197	-136	514	312	156	319	258	127	328	645	272	185	53	267	334	218	310	278	110	-47	189
1157	202	222	-55	-84	139	-34	62	-33	242	15	71	298	101	89	106	-10	0	352	248	225	174	78	295	-201	348	187	333	273	-109	-512	446	249	133	210	3	4	793	285	-32	176	-324	66	-200	-8	149	388	29	47	-144
1158	-9	56	-37	29	-190	73	6	134	23	23	-63	16	61	-125	0	50	-14	-34	75	222	-14	4	-35	158	-9	-158	-130	68	509	-178	84	-160	85	18	-3	-80	201	-712	-160	119	266	162	-40	88	-67	33	10	229	113
1159	75	83	-26	3	-12	129	-31	93	52	58	101	68	26	163	21	38	120	132	-89	133	118	31	143	-87	5	-225	-75	17	345	-592	-215	3	190	43	58	-154	-359	-553	-13	-76	227	-57	56	103	-11	29	37	-307	199
1160	47	92	39	171	152	60	-39	83	-35	-112	105	-37	127	42	53	36	63	89	45	102	210	3	139	110	82	788	222	319	602	-45	162	57	72	114	195	23	603	469	-50	182	474	83	241	67	127	59	89	495	329
1161	36	30	102	-386	158	-66	57	100	28	-47	91	23	37	-3	-1	-55	94	181	173	49	210	-37	17	33	-63	-54	199	15	-10	-15	246	153	83	34	43	-11	-63	-33	-26	-5	58	42	-234	47	108	60	20	139	-13
1162	-4	-122	6	-78	228	28	0	254	99	58	71	272	82	0	765	86	57	254	-27	257	1041	51	38	29	139	286	317	332	49	182	803	30	-14	344	180	-13	254	234	114	-65	353	-104	259	147	-31	573	46	411	182
1163	82	-241	230	-201	-559	-4	290	566	5	131	285	-41	-87	-227	37	18	-16	66	-206	179	41	-51	-34	227	-330	543	193	199	986	413	273	-304	197	3	258	-55	127	-58	277	2	503	203	-241	286	-28	-6	319	83	24
1164	-1	-107	-59	-57	-38	46	37	16	-8	-19	-64	-20	-135	12	5	-35	-35	31	3	63	35	-1	-24	49	41	98	-78	-2	104	-155	26	-19	-8	18	-7	23	105	-209	32	-76	125	-100	-40	33	-31	-17	64	-145	-144
1165	17	88	-26	-91	114	26	-35	194	52	20	14	61	93	83	26	-32	29	8	44	63	71	50	-34	69	165	85	39	135	115	140	-31	26	83	67	-15	46	243	-335	-18	111	29	-42	54	5	26	74	35	-156	-103
1166	461	868	496	370	705	172	506	1684	674	137	488	981	274	556	673	196	456	303	627	747	704	737	533	-29	529	1570	916	840	964	212	782	186	570	533	258	205	1206	729	507	125	1035	321	891	670	397	1178	576	713	360
1167	152	236	297	-132	336	503	48	1439	90	593	144	748	258	571	768	24	1135	-118	-7	680	2021	1929	742	-199	57	47	281	1155	-449	-546	903	-127	36	722	497	-210	518	511	136	-19	1301	263	284	-152	142	-90	-283	3065	-10
1168	-96	-68	133	-207	254	-10	2	43	-34	-8	-127	-116	-175	-63	-36	-98	-55	49	-73	-63	-88	-27	-110	-187	-59	-330	-72	-232	-126	-326	-462	-137	197	57	-90	-129	-476	-813	66	-212	-91	-29	-79	10	-78	-51	-116	279	-347
1169	46	276	-53	67	247	197	190	244	150	83	38	53	21	464	56	7	74	155	264	394	233	166	106	132	301	352	65	-2	-5	417	525	550	95	147	160	219	645	410	213	356	145	154	329	150	144	257	231	279	178
1170	10	75	-141	-97	2370	159	2	-395	-94	-104	145	-65	434	-318	-99	-127	-136	274	-65	-497	-230	244	-291	124	502	362	-16	-58	213	-311	1050	190	175	114	-180	41	-645	-8	-173	-201	261	-231	-99	32	-241	244	-194	-470	-48
1171	558	603	372	33	603	507	295	1120	358	196	292	561	303	1072	565	290	542	525	654	782	621	607	488	413	870	1859	795	1024	1298	402	987	778	465	475	297	432	804	-33	875	244	1073	441	433	468	693	740	499	691	402
1172	118	68	-13	218	-1550	100	119	613	-178	-58	234	214	-162	423	166	81	132	43	187	-151	-174	-14	-116	57	275	-6	9	-89	701	-189	162	88	79	86	-15	34	-539	-209	378	-375	488	-34	580	253	333	150	337	417	371
1173	312	1265	547	254	482	507	128	479	794	338	197	919	215	665	757	232	760	326	499	408	260	905	1491	187	890	413	1054	1111	931	197	993	761	1126	567	594	159	10	-251	707	204	469	317	575	1014	457	1799	135	1819	209
1174	237	330	292	530	76	494	68	-254	1038	746	868	822	740	553	595	390	268	1039	325	-225	198	629	897	154	902	127	425	10	158	577	-451	1290	1538	218	528	499	232	-16	269	410	261	424	697	213	91	534	313	-352	604
1175	134	440	834	-289	-438	224	510	744	404	-111	548	74	3119	-230	86	106	42	667	904	525	364	96	1226	870	667	-289	108	360	663	861	541	368	-116	405	109	765	793	1877	264	-117	183	259	205	783	170	-50	932	159	388
1176	3139	1532	3660	1476	1455	2453	1649	3052	1809	1548	3040	2556	2040	5121	1820	1655	2986	2579	1881	4699	4250	3074	2528	1868	3084	3486	3094	3041	3129	1150	3194	2801	970	1618	129	3050	3165	5986	2343	1102	4802	1347	2476	3231	2837	4285	1719	3286	1202
1177	-86	566	-26	239	146	221	46	194	234	54	127	95	-10	316	242	43	78	372	303	-35	-62	173	2	-132	500	69	350	-40	-389	34	803	189	383	-70	-227	-129	148	-209	-162	-65	-299	-34	194	120	123	157	264	-30	-113
1178	376	53	150	304	216	187	102	459	603	163	142	542	-39	411	309	66	272	262	351	66	284	422	156	177	342	327	383	490	279	235	147	374	14	177	121	83	105	511	32	231	48	263	399	281	172	375	180	221	209
1179	404	-100	-93	-84	216	21	31	-221	-154	10	-60	-79	90	-311	-158	-29	-123	-37	-186	-42	74	-105	62	98	-11	429	-65	74	16	91	15	-140	-183	-121	27	20	275	-402	2	-46	-280	0	117	-27	-20	-217	104	111	-89
1180	157	387	221	-7	654	133	233	-20	130	88	49	369	63	354	150	156	61	236	383	260	639	220	128	-53	628	413	212	373	252	102	246	184	59	239	148	182	201	368	173	255	396	134	410	182	325	293	82	621	161
1181	359	321	217	214	514	640	153	305	379	15	504	165	157	292	552	640	130	158	265	274	843	422	241	174	313	371	327	664	295	311	520	318	219	208	183	339	434	553	56	356	536	55	2	272	387	444	249	783	357
1182	59	-92	-48	104	82	-7	11	-26	53	11	-40	13	39	209	34	35	23	-34	29	17	47	-3	8	0	161	155	-13	109	-361	-129	194	-3	-78	63	-3	97	-52	-217	165	106	-29	-14	-76	-20	26	81	128	-44	75
1183	15	92	-86	401	-69	-5	153	553	-103	-121	-84	-104	-98	-358	-175	15	-258	-31	-174	-384	-68	-85	-79	-61	-256	-705	-288	-25	586	-34	-383	26	-282	-127	86	106	190	536	-8	38	382	205	-72	-143	-80	63	-173	-128	618
1184	78	-184	-15	-50	-559	-136	64	-50	299	72	-120	126	-218	-79	177	-41	147	179	-145	-303	17	6	-98	-126	-131	-978	-170	-183	-87	-337	-877	204	-160	69	203	11	-1132	-486	2	-84	-77	167	-363	-279	-112	344	-122	-296	-99
1185	33	85	-59	14	-50	2	-46	-36	-11	-25	-8	-26	58	38	3	3	1	-155	-49	95	14	5	8	-96	41	92	39	17	-76	68	42	-25	21	-85	50	120	42	-184	-5	62	-207	209	124	-133	-99	-48	-17	193	-79
1186	111	-68	-64	41	19	-8	148	114	50	-41	-53	116	-85	260	60	41	251	31	113	35	239	-32	49	-45	204	-57	176	114	16	37	15	1	-51	151	35	106	0	-226	-21	5	-111	152	130	-71	140	125	16	2	30
1187	21	486	84	-319	883	-31	64	-174	415	-136	144	464	-143	683	310	49	-15	288	116	193	731	184	147	-324	468	-486	409	613	-356	68	-262	73	201	6	-62	120	0	1752	248	182	-435	-117	476	-343	112	213	-77	405	10
1188	1399	893	1916	557	864	716	1114	1060	872	655	926	1814	916	2266	1023	596	1569	803	703	1142	1548	2529	1193	642	1936	2059	1532	1063	1085	573	1082	1014	411	1189	794	808	677	989	1518	623	1368	1536	1307	573	1749	1667	1158	1444	522
1189	126	20	31	-65	-25	7	106	70	31	-11	-53	98	125	78	43	-3	102	127	103	176	224	159	-20	-88	157	101	-6	-160	142	11	10	97	-69	-3	-86	173	84	117	-82	-40	-29	107	-137	-76	-41	147	10	61	68
1190	142	202	4	-542	171	160	2	634	45	-90	-266	211	55	51	217	-49	-241	395	-282	423	506	296	569	334	15	276	209	224	323	-94	667	453	-96	158	113	272	10	511	221	70	-691	192	264	-93	35	876	80	159	508
1191	-2	11	6	-46	-343	-31	39	154	1	-31	53	-28	-2	-79	-47	-12	-54	-34	-22	59	-2	-73	20	31	72	165	85	-20	76	-15	0	67	-14	-86	50	90	-317	-167	32	-29	-169	-94	-203	-38	-3	0	-73	-106	113
1192	19	18	146	59	317	72	117	516	286	78	144	90	482	835	99	78	264	103	132	793	529	383	203	114	273	1894	183	416	476	167	362	329	225	49	97	376	169	293	232	340	860	304	516	-27	575	223	374	935	347
1193	291	-419	212	557	-317	63	142	442	-277	75	344	116	149	239	-260	170	451	51	478	313	1142	-114	794	340	-72	654	65	664	1298	516	593	565	-317	-42	293	214	1947	2246	341	1393	551	152	833	387	224	-163	456	904	415
1194	47	73	22	-147	25	34	-93	43	9	-3	47	51	7	33	42	-64	79	-37	55	74	174	-89	-15	57	98	9	199	-48	-32	-318	210	43	-105	-81	86	120	52	-108	-37	40	-207	-10	-230	-44	22	93	-98	22	41
1195	216	-484	-266	-328	-101	-1	-44	60	-199	38	-64	136	-119	-1270	279	-178	-80	60	-106	-49	763	-1006	-42	-162	346	-251	6	143	235	-189	-225	-1220	-1151	-121	-7	43	-105	-326	298	-272	-130	-128	-130	-275	-31	57	-68	156	6
1196	-64	-529	-166	-63	-19	-4	-155	-20	-283	-55	-83	-56	-50	-807	-78	-66	-112	-23	-78	-21	-8	-471	-7	-81	137	-139	94	-148	-120	-121	-52	-498	-266	-99	-35	-101	10	-150	21	-32	-33	-130	27	-79	-31	-16	-46	-41	75
1197	951	1079	907	74	476	484	1072	318	1593	363	668	2205	612	3951	1839	624	1924	1042	2661	803	1151	3963	916	373	3362	921	1548	812	871	448	572	1849	684	479	281	751	1873	737	1281	995	546	829	577	365	1163	2960	464	1229	154
1198	430	430	476	272	508	195	237	144	199	117	155	270	189	383	187	47	200	170	354	472	568	40	247	344	179	791	222	242	783	429	877	396	163	593	195	293	645	570	325	274	923	542	521	172	228	308	297	867	192
1199	-435	-566	-865	-936	305	-572	-830	-2415	-462	-142	-730	-605	-554	-639	-577	-300	-540	-453	-1995	-232	-461	-187	-611	-492	-429	-791	-464	-237	-1589	-334	-1991	-982	-868	-79	-524	-589	899	544	-101	413	-2133	-357	-1679	-824	-719	-440	-688	-1830	-1130
1200	528	162	902	276	-38	260	890	241	275	353	394	870	-69	1745	307	381	459	395	32	141	455	1057	232	177	4488	336	140	352	290	-34	-1003	-457	187	712	211	510	232	-50	661	46	498	437	185	235	687	234	317	344	-175
1201	14	127	57	-18	-44	88	-2	-33	129	37	26	211	29	854	175	30	203	135	365	95	198	342	57	41	793	117	180	22	98	-117	15	219	175	9	58	101	465	-134	93	190	154	-6	151	130	144	394	-19	114	-48
1202	30	207	37	209	184	211	2	97	40	48	60	86	55	227	253	49	125	187	178	3	263	114	28	164	212	171	163	104	-230	220	404	200	268	5	-15	164	317	-352	74	-21	469	0	212	121	7	149	102	-61	158
1203	429	388	543	299	374	363	381	942	131	146	147	479	149	1660	571	224	798	470	215	980	707	1400	670	122	1329	1166	884	1139	1107	375	798	1447	414	452	86	298	1090	402	589	299	1102	246	708	201	932	1215	356	467	-230
1204	-230	-588	-439	-527	-368	-236	-432	-466	-554	-197	-428	-189	-122	-548	-286	-175	-369	-557	-627	-676	-491	-275	-331	-373	-372	-400	-717	-526	-1101	-679	-1140	-377	-405	-246	-348	-168	-1492	-905	-170	-280	-981	-280	-388	-541	-449	-343	-437	-1097	-268
1205	169	357	133	564	222	205	126	150	304	101	276	185	175	678	166	96	190	-2	269	317	159	140	408	126	96	314	579	339	635	-216	1187	482	422	247	246	69	-52	310	96	-108	469	115	225	284	174	165	417	809	-99
1206	53	-305	-237	-813	-50	-140	-179	-46	-337	-135	-209	-72	-341	93	-172	-12	-108	-75	-204	-405	233	-208	-317	-27	-261	-492	-402	-235	-816	22	-840	-550	-65	-189	-121	117	-190	-1383	-264	-43	-425	-143	-514	-84	-149	-211	-141	-604	-206
1207	316	419	157	-291	203	82	95	244	298	152	-83	339	69	367	293	198	315	205	346	-162	159	284	290	-11	307	190	166	48	361	56	-126	127	364	93	164	191	666	687	317	111	807	218	352	-5	1	402	149	125	419
1208	12	-338	-130	-89	-1347	-133	-557	-516	-38	-204	66	36	-333	-74	14	-3	-243	72	-303	-1156	-281	-5	-456	-462	-90	-1551	-533	-332	5	-1461	-357	-496	-515	79	-195	-545	-529	-1098	-34	-751	-565	-109	-686	5	-350	24	134	-187	-44
1209	228	164	77	-114	-44	168	150	134	239	61	202	325	165	100	231	213	168	248	334	7	171	411	102	73	476	76	160	137	202	45	-136	-50	-26	215	-97	39	179	25	138	78	24	394	-31	94	97	209	110	109	134
1210	-54	-424	86	-388	-177	-13	-59	-6	-321	-123	-6	-127	-159	-385	-221	75	-242	233	-169	-253	56	-160	-16	-88	-43	-15	-291	-109	-208	-201	-94	-390	-171	-5	-238	-41	-603	-578	66	-141	-217	55	-167	-54	-342	-315	-41	-162	-175
1211	183	244	-35	179	63	-4	150	1858	198	-13	221	120	538	824	133	170	215	-75	160	45	68	134	558	172	281	190	94	442	1337	577	99	297	658	45	176	57	-137	377	579	-19	382	527	839	-3	185	205	183	576	1158
1212	-17	-308	-11	-198	978	89	35	-93	-108	-11	-85	-36	-141	-260	97	-64	-108	-231	-89	-144	115	-195	-12	-152	-131	-133	-150	-56	-213	-265	-152	-357	-309	2	19	62	-349	209	-34	-76	48	-64	185	-15	-134	-88	-13	-33	-27
1213	-13	-130	46	-319	-216	-50	-33	13	21	60	23	92	-34	-90	-8	10	140	72	229	102	79	-55	51	-122	76	470	29	158	-109	-26	609	6	-310	75	-3	101	-846	-201	-114	-176	-159	-104	-108	6	112	188	137	139	-164
1214	-10	-124	44	-65	-57	11	37	130	-33	15	-7	-20	15	-33	-10	-16	8	-54	-13	-81	-35	-10	98	-112	-51	73	-98	-35	-76	-18	220	-13	-9	47	39	39	-285	-150	-34	-68	-174	89	106	23	-16	-20	-17	207	-233
1215	-195	-251	-328	-1037	-247	-256	-213	-483	-345	-189	-415	-133	-181	-461	-177	-143	-572	-361	-275	-821	-586	-167	-275	-476	-354	-1087	-573	-482	-981	-546	-819	-550	-374	-316	-230	-321	-730	-578	-74	-168	-1276	-267	-760	-164	-301	-409	-423	-663	-628
1216	284	688	212	523	216	329	259	268	117	124	282	285	386	465	356	126	164	395	528	624	127	142	321	427	336	489	271	68	361	383	930	807	370	189	320	263	539	922	192	329	357	179	214	291	149	399	576	685	-302
1217	1030	1099	1184	401	502	510	947	1254	1262	345	1078	2346	591	3435	1450	327	1766	1071	1226	810	1290	2446	1095	617	1355	3089	1339	687	657	170	972	1650	732	1008	598	462	973	1156	888	1064	1073	1116	945	1527	1266	2383	1194	1553	243
1218	67	-144	-73	-155	69	-89	299	-100	-292	-30	-23	-127	18	-102	-80	87	-125	-181	-250	-176	-370	-24	190	90	204	-41	-16	76	49	-186	-388	63	-263	-137	82	23	-243	-394	2	-108	164	-212	-42	-13	86	37	-82	-257	61
1219	-45	-973	-594	-848	-807	-498	-570	-1684	-831	-175	-939	-568	-199	-48	-651	-227	-1319	-1351	-1317	-1142	-506	-261	-538	-696	-789	-1455	-848	-608	-827	-330	-1618	-1442	-1118	-505	-450	-201	-1979	-771	-186	-421	-1378	-722	-982	-47	-616	-1125	-801	-1573	-567
1220	-119	117	77	128	-305	-73	-91	-281	-152	-140	-114	16	-218	117	17	-87	-140	-225	-148	-278	-106	-76	-119	-90	112	-15	42	109	-65	-372	-472	-169	116	98	-156	-80	-359	-729	-82	-38	290	34	-158	-18	-103	-73	-38	-11	99
1221	441	539	93	-745	787	-477	339	-402	475	-9	-205	549	-138	1035	-41	236	187	-141	-315	676	-562	1229	748	878	716	-1621	1175	641	443	1112	220	868	-254	424	242	-101	-1429	989	424	617	-1673	392	67	838	738	2390	271	75	-274
1222	20738	31437	27912	29712	21319	27700	29453	28816	14698	22936	20933	15428	45915	14027	22394	28109	15469	37735	22780	27094	29125	14342	26757	30694	29272	48271	18451	25761	23716	38279	41895	11363	23715	20691	43727	35791	18949	21621	30998	38634	26858	30484	34945	28445	29823	16072	27002	27433	30265
1223	11027	8761	4290	11618	4600	10727	8424	4773	8602	13524	6281	10510	9436	7383	10828	11497	8508	6126	7524	4544	5781	9465	6807	8980	2828	11471	4007	6404	3622	6948	3168	9533	4971	9825	21740	13178	3652	3445	8630	10580	6384	11364	6747	8730	5355	5647	11038	4084	9340
1224	9	-20	13	158	-25	0	19	-144	-21	12	-6	5	-47	-99	-14	30	5	54	-68	-28	-133	-7	-85	5	-78	-95	-98	22	-76	246	-105	34	-25	10	97	-13	-307	251	-26	-68	-9	66	117	91	9	24	-8	95	-51
1225	-153	-8	-224	-614	-667	-282	-523	-922	94	275	-367	454	-905	-262	161	69	-114	-89	86	-750	-586	655	-110	-510	37	-889	-45	-355	-920	-710	-1476	-227	160	-38	-203	-159	-868	-813	-424	-451	-1223	-387	-424	-484	-251	132	-556	-1489	-1051
1226	-375	-722	-831	-700	-1594	-484	-606	-1616	-586	-261	-763	-270	-988	-969	-492	-306	-641	-748	-436	-1410	-627	-426	-802	-844	-764	-2097	-566	-807	-1912	-1446	-1734	-544	62	-423	-504	-559	-2223	-1333	-560	-704	-2108	-662	-1248	-655	-689	-653	-759	-1595	-725
1227	493	427	113	461	495	156	352	540	151	129	169	272	378	596	258	56	224	251	331	493	293	280	308	306	236	727	212	390	328	653	525	315	380	192	164	249	264	620	184	149	430	158	510	358	310	450	355	453	305
1228	174	45	-459	-381	184	69	-57	-721	32	121	-93	537	322	578	192	230	-335	132	54	687	-242	207	-271	69	332	877	49	68	-476	303	336	19	-158	306	-207	73	-137	33	354	-152	-459	-14	-268	-126	339	46	308	151	-103
1229	22	55	73	65	-108	97	-53	6	28	59	-59	53	79	8	21	32	46	51	10	28	-162	51	20	61	11	-98	-3	127	-38	-132	-52	11	102	14	86	87	232	-201	53	100	-309	66	209	40	43	4	-4	64	116
1230	128	254	272	33	216	89	-44	-6	256	57	93	176	45	257	159	86	216	86	163	63	-32	893	152	43	59	327	144	181	389	201	194	201	271	118	50	152	317	335	200	81	261	171	298	125	65	243	152	95	113
1231	372	68	417	284	165	378	281	174	232	80	208	99	82	515	238	98	285	-2	137	81	375	604	-20	-11	244	257	360	109	-142	83	10	213	303	298	54	18	-275	67	282	100	353	216	209	-45	170	363	191	-271	134
1232	-293	-574	-326	-697	-235	-243	-348	-442	-311	-140	-312	-170	-530	-581	-271	-221	-527	-288	-488	-1188	-713	-180	-556	-492	-135	-1646	-474	-600	-1320	-858	-1445	-664	-388	-350	-348	-529	-995	-553	-467	-661	-769	-389	-973	-672	-430	-157	-280	-1514	-281
1233	71	95	177	-14	-25	150	170	265	177	15	169	186	71	652	145	83	168	138	311	-91	177	101	140	126	344	82	235	-7	241	106	231	288	73	86	-66	67	264	92	176	212	101	6	246	33	127	386	58	44	48
1234	415	197	953	558	654	197	648	1194	431	98	478	1034	687	667	485	269	649	181	146	1047	636	405	517	911	321	629	1329	600	1013	512	1135	585	393	839	943	691	2223	1291	739	389	556	889	1379	377	818	474	1291	1013	278
1235	220	5	139	158	438	294	221	285	170	-31	161	172	261	615	129	183	130	213	312	599	361	32	371	158	630	495	625	332	339	208	630	163	89	327	-31	120	391	234	728	435	517	85	237	50	331	286	191	459	144
1236	-208	1	-523	-186	1099	-33	-246	-922	-249	149	-580	156	-221	115	-110	-103	-175	294	65	52	-213	243	-348	-27	78	-740	144	-472	-909	-121	-551	168	-397	-296	-183	104	-793	-192	-184	-242	-957	21	-853	-733	-230	-58	-474	-1108	701
1237	161	-98	66	162	-82	-27	53	171	137	44	17	167	474	241	6	-18	63	-95	-117	-31	79	60	28	9	64	181	-16	155	-65	22	304	-7	143	30	0	97	148	326	88	117	91	81	-45	11	48	214	-44	649	3
1238	-29	-276	-259	56	-63	-271	-248	-727	-245	-16	-350	0	-386	-81	-30	-118	68	-268	-223	-257	-180	40	-364	-361	-189	-1036	-137	-301	-279	-524	-1024	-615	-150	-110	-27	-115	-836	352	-61	-331	-880	-109	-783	-179	-280	46	-361	137	-563
1239	691	616	1040	542	1143	471	424	969	337	235	793	1926	554	976	838	458	1036	652	571	1025	908	780	784	573	980	1398	736	493	728	827	1292	709	817	891	203	1116	603	-108	848	468	928	443	564	778	713	1770	652	881	419
1240	-4	497	-164	-499	2738	236	379	-1194	-445	31	-439	123	266	348	-231	-98	60	560	-97	673	432	11	385	168	47	-22	-176	-183	849	721	1403	-958	-478	-174	-234	529	1789	5122	-74	859	-91	404	616	-330	234	-394	-374	81	432
1241	418	390	472	235	177	179	439	452	564	125	356	654	229	993	406	286	822	427	423	391	500	690	444	189	813	387	703	470	454	94	551	738	119	279	62	256	359	293	509	92	478	254	345	250	487	1033	310	643	240
1242	180	425	255	82	305	92	195	459	397	1	234	229	263	386	200	186	362	132	296	98	429	301	252	92	354	794	301	482	350	330	488	409	417	336	62	117	391	603	413	244	232	115	381	726	286	350	337	344	24
1243	52	137	68	-44	-95	85	39	0	2	-29	16	-19	-13	307	-16	46	15	106	-78	105	2	26	39	150	378	50	163	94	-71	98	52	-45	35	34	-105	76	148	41	2	-204	-19	14	18	-22	438	59	49	405	-6
1244	-1	21	-33	65	-209	-63	71	-20	-60	19	19	18	-47	30	12	38	-9	-17	3	70	100	13	11	160	37	76	0	0	-38	159	0	22	-8	-31	-58	104	74	-394	-32	13	212	4	-90	-23	99	-11	35	67	-54
1245	183	-53	77	-18	-285	91	53	-107	4	-4	-105	76	-2	118	42	-1	189	72	-45	-176	47	93	28	7	45	244	6	17	-76	-18	-152	-99	25	-61	58	138	-190	-150	-120	8	275	-34	-119	-37	18	396	44	33	44
1246	1090	67	738	555	-19	1477	883	415	1347	1378	651	2374	498	3986	679	532	1045	366	488	620	725	1120	257	486	675	909	900	1201	646	-18	147	2080	1271	564	262	926	793	67	1246	280	948	437	654	306	1196	1180	362	207	271
1247	15	20	-35	63	-25	-44	-84	-355	-19	-104	24	-38	-63	-30	-27	-13	-15	51	-48	-179	-50	-5	15	-63	-49	-301	32	-33	-208	-140	-36	-14	39	50	-125	87	31	-167	-72	-13	-87	-12	-94	-47	-56	-19	-74	-324	82
1248	307	754	383	712	139	184	406	1127	710	228	453	461	482	973	561	118	459	603	754	243	441	445	537	164	841	1029	690	868	1309	-53	725	924	430	424	227	191	846	846	240	331	527	274	880	802	601	845	392	985	360
1249	2768	1585	845	637	768	707	739	301	765	317	366	2215	306	2126	806	887	1225	782	825	81	461	2727	375	310	2913	146	1768	2430	493	250	194	1101	1107	1039	407	411	1026	947	707	677	203	606	627	436	992	2046	532	923	408
1250	42	-115	-68	-33	482	115	19	-3	-49	-22	-11	-33	-18	-345	-39	24	-64	34	-213	-66	-41	-74	-49	104	-167	146	-222	12	0	41	-10	-96	69	-21	86	-9	-95	-285	-144	-160	-48	-53	54	-38	-84	-118	-13	-134	137
1251	63	26	605	289	-76	-133	115	238	2	374	0	634	154	2026	5	67	678	-5	51	-126	127	39	-28	-5	59	133	52	-38	104	-79	131	3	-4	-70	-62	871	211	108	-24	89	24	77	4	-37	-18	26	50	47	20
1252	-26	192	-315	-319	381	-18	15	-275	-172	-59	-325	-88	-463	26	145	29	127	92	-40	-105	65	171	-51	-237	-92	69	130	-112	-120	-611	-52	-43	185	23	-101	-34	254	75	293	-19	62	-220	9	-211	-95	-69	-126	-629	65
1253	2776	786	574	880	673	1271	1396	1362	1088	1178	1001	2674	1694	5562	2392	1364	1477	1675	1558	2189	1459	1634	1611	1008	2519	1563	1944	1438	2077	827	1791	2172	922	1215	904	1807	1196	1400	2004	995	2007	966	1898	853	2285	2064	1040	2032	749
1254	67	243	70	160	101	76	93	318	101	82	89	47	106	80	58	69	131	121	178	-52	29	22	33	39	120	177	193	61	-98	387	336	229	281	-69	105	80	434	435	56	114	145	38	79	140	204	162	25	184	82
1255	-16	11	-42	22	-235	-4	-8	36	-72	9	-16	-41	-34	-206	-28	-29	-68	37	-48	-116	29	-43	-34	47	-5	-222	-62	-7	82	-98	-10	-20	441	-53	82	-60	-137	-268	-58	-185	-72	-10	42	-8	-91	-50	32	-114	-75
1256	303	97	77	22	254	395	182	566	165	4	51	397	234	3362	645	147	823	337	374	736	808	5	289	112	1758	1551	834	314	663	379	1061	462	163	263	74	404	592	469	781	272	2162	239	377	152	899	930	65	596	134
1257	673	724	685	173	247	382	466	875	669	227	283	757	210	1554	473	316	622	106	227	694	669	1534	544	486	618	559	1208	684	909	235	709	694	256	525	332	265	486	645	832	361	565	505	562	619	631	1162	443	895	113
1258	1040	968	1237	1237	692	146	370	1016	1408	377	911	1762	173	1573	752	667	495	462	861	810	1154	251	1007	1000	805	1033	438	674	1375	607	1812	1116	336	614	618	959	1873	1953	293	1047	759	422	29	1269	421	1615	1089	2488	659
1259	175	179	188	-29	343	216	119	-154	51	79	73	-48	-61	27	41	90	69	-219	251	-317	375	28	-66	-77	-11	394	-183	-58	-295	-246	709	338	-126	-82	109	64	52	276	40	171	183	190	-331	121	39	322	26	949	54
1260	130	134	44	-35	-44	78	-48	10	76	-12	11	116	53	149	112	-30	77	37	34	-197	-85	108	116	-63	114	130	209	74	104	-94	31	108	-17	150	19	99	243	276	53	76	135	-77	54	-77	43	295	80	41	-41
1261	-22	-129	48	-304	19	-107	-46	-73	-66	-81	-144	-43	-15	-412	-40	-26	-57	0	-50	-144	-337	-119	-58	-189	-104	-28	-101	61	-323	94	-225	-183	-144	-82	3	94	-211	75	82	21	-338	-25	-194	-172	-5	4	-91	-274	158
1262	-54	-278	31	-123	-209	-37	-68	-291	-270	-68	-66	-102	-58	-542	-138	-193	-138	-176	-242	-112	-180	-395	-74	-41	-232	-165	-140	-163	-290	-49	-446	-376	-422	-7	-168	-134	349	-92	-210	-97	-116	-42	-205	-154	-134	-160	-59	-13	158
1263	26	-142	46	50	114	57	-133	-177	-113	-112	-188	31	5	-354	73	-70	-219	83	-184	-17	82	-184	134	302	-39	-95	-130	-122	-186	182	-162	14	-76	1	-180	187	254	67	-157	8	-295	-94	67	-64	-140	10	-26	-193	3
1264	32	-72	177	9	139	8	8	36	21	37	115	-12	-34	-192	12	-84	18	54	-53	-186	-168	-69	60	158	-41	-3	117	79	115	-45	173	-86	-96	-113	-54	57	-201	100	21	-190	241	-175	189	152	-46	-55	35	-363	113
1265	32	85	79	203	393	84	115	0	57	29	86	52	26	45	11	-40	18	176	89	-88	-192	-12	-30	71	114	187	91	48	60	243	262	166	167	15	35	46	-10	-58	226	76	169	6	158	50	31	25	101	-226	161
1266	2253	3359	2520	1932	2484	1713	1824	2754	2269	794	2158	5071	2839	6839	2496	1544	3463	4015	2575	3285	3427	4439	2598	4018	5837	5355	4325	3028	3173	1188	3715	2799	1687	4237	1127	3207	3737	3965	2778	1913	2481	2464	2442	5205	2635	5506	2668	3922	1199
1267	83	182	-46	91	838	7	-33	20	-15	-43	-10	92	-229	142	98	44	30	80	188	-186	115	-2	20	3	240	184	225	127	-49	-201	36	-21	43	9	-160	247	179	1014	130	-73	111	-139	191	191	89	129	28	167	-51
1268	505	1066	186	241	5795	1114	2037	429	204	411	436	281	106	2044	3507	518	399	1233	658	3328	7436	703	441	229	3716	6976	975	945	3261	554	3058	1891	986	1155	309	358	783	18326	2759	2468	4367	379	647	413	1843	4004	480	3675	1182
1269	62	77	124	250	82	78	408	244	35	41	57	95	306	180	284	47	87	736	18	38	0	148	38	-39	919	432	153	293	367	292	378	100	11	-30	-11	108	550	167	290	144	324	57	474	77	198	-6	34	226	54
1270	177	553	727	680	521	294	350	660	398	193	384	788	551	1062	421	295	811	491	732	1311	914	572	508	379	797	956	422	608	1161	1070	1061	521	383	336	219	395	243	746	608	204	1136	372	1261	858	1054	804	444	1503	367
1271	-21	-222	-31	-119	120	21	55	-157	-56	-25	-30	-28	18	-86	-72	-1	-73	-46	-134	-222	-109	-45	-97	-25	-13	-130	-134	10	5	26	-21	-132	-122	-26	-74	-9	-201	108	64	13	-43	92	-88	5	0	-5	-5	-246	-17
1272	73	177	-39	530	610	27	190	788	-10	-25	317	-34	431	386	-11	89	160	493	31	440	293	-52	317	314	393	177	-91	373	230	7	378	26	99	181	-7	277	539	368	-2	321	725	456	288	218	245	-224	123	-279	-79
1273	74	-430	-31	-396	-508	-218	-15	-184	-344	-107	-136	-207	-194	-158	-181	-41	-89	-109	-272	-324	-364	-192	-15	116	-208	-518	-121	-33	-334	-413	-451	-64	-123	-110	-203	46	-614	-947	-61	-457	-367	-104	-555	-143	-80	-285	-38	-593	-44
1274	99	33	126	147	527	69	148	10	16	90	35	38	114	49	106	46	19	23	99	190	53	-22	135	-49	-23	95	45	58	372	197	236	16	-15	141	43	154	772	251	-66	187	33	199	275	10	74	12	70	369	3
1275	61	112	37	20	108	76	173	164	60	-25	131	68	42	292	84	36	104	181	79	59	219	-16	120	100	124	559	258	189	76	56	283	38	122	13	78	60	402	159	26	89	-48	154	146	45	69	60	270	193	219
1276	1291	2056	703	285	2624	1338	1438	771	3453	289	1126	1958	-29	6086	3854	1041	1238	2625	1728	1226	1838	2402	2675	1465	4983	3086	1859	1216	794	463	1434	1734	1027	2287	317	233	1439	2976	1577	3254	2621	962	641	980	1781	3146	1349	1870	233
1277	1170	306	1570	785	1054	987	1347	2180	2075	856	1155	2931	1409	4380	1568	870	2980	1213	1858	1776	1184	1621	2008	255	2859	2110	1512	1231	1501	1025	1776	2789	1620	1032	528	1194	878	653	2153	1488	2665	839	1429	455	2191	3078	962	1769	560
1278	42	-273	-51	-200	82	-144	-6	-419	-58	-1	30	0	378	-408	-30	16	118	-77	-56	-394	189	-294	72	118	-11	-19	-75	43	257	-318	-199	87	-78	50	-144	154	-211	41	-72	-163	-120	81	-469	-54	31	-72	125	414	-450
1279	308	938	97	91	203	147	88	134	407	40	50	520	154	1916	653	133	438	288	897	126	168	959	148	85	1815	136	314	214	115	-110	-57	667	397	227	86	210	412	561	85	351	290	299	11	18	384	705	129	-41	-58
1280	2	67	-33	248	-114	-37	2	114	67	25	-71	74	-135	103	39	24	45	231	79	-31	171	29	-20	67	133	-260	-32	143	202	-87	-194	36	114	43	-129	20	359	201	117	-24	33	10	-234	-45	-26	79	52	106	30
1281	29	-256	42	-190	165	21	144	3	-124	72	-59	46	215	-81	-67	112	197	340	-120	380	219	-99	-57	302	-167	73	101	51	-191	246	78	236	-82	111	23	2	-116	-167	-40	-29	33	62	90	64	-43	-56	217	-305	-247
1282	1676	900	1861	491	864	1000	1176	1868	874	678	1003	1612	1481	3006	528	755	1744	1444	594	1674	1420	1836	1225	1273	1232	2447	1480	1377	1452	1237	1823	1284	-35	905	939	1077	201	1492	1686	732	1721	1135	1727	1158	1234	1249	1140	1072	560
1283	-357	-878	-758	-732	-438	-346	-208	-1341	-526	-158	-533	-26	-303	-1099	-826	-227	-890	-629	-1136	-768	-435	-525	-673	-379	-1565	-1029	212	-375	-970	-721	-1403	-1489	-1721	-424	-328	-524	-698	-293	-162	-473	-1141	-344	-1192	-792	-412	-1862	-325	-993	-601
1284	53	-28	0	282	-57	-42	28	53	-116	-64	-77	18	0	321	-17	4	-79	106	30	-59	-68	217	21	11	-37	251	55	76	126	91	168	-58	140	7	66	78	222	25	-45	-171	130	29	-313	231	54	26	-82	260	-357
1285	123	489	361	639	-934	-43	102	446	402	-19	153	65	245	735	368	166	78	447	641	250	669	286	163	83	323	273	150	771	652	-106	535	81	276	157	450	191	-402	-243	226	-108	386	-132	279	13	522	76	88	-81	388
1286	236	1275	452	527	3037	485	574	1546	1210	301	750	502	716	1649	901	524	733	1155	1173	1092	1166	709	779	1453	1514	2768	1214	666	1320	1397	2364	1535	820	335	559	912	1937	746	1046	560	1992	437	1444	805	715	1895	628	1629	357
1287	54	281	46	198	235	10	99	-36	-41	38	19	30	-10	-153	114	15	16	-14	-149	17	32	-21	10	183	-120	273	-19	20	361	-227	126	105	-242	-34	101	16	582	-192	181	78	91	44	124	82	196	-129	74	201	-44
1288	1743	2517	1541	1839	10732	822	2022	2254	1777	402	968	1143	1004	9031	3043	666	2195	2590	1825	4301	7592	2387	1729	2829	6123	5346	6967	4684	6204	751	9715	3758	1859	3946	1002	1539	9464	5432	4713	1455	3830	1135	2431	3013	5155	4369	3305	8342	1055
1289	9266	7584	4674	9671	2147	10461	13115	5595	10222	16007	13581	12587	9891	12021	10637	14834	12982	8165	6220	7086	8007	13335	8579	13020	4459	9347	4757	4267	3601	7199	5428	12876	7999	11048	8721	11438	2212	3152	8694	6637	3516	11334	6644	12052	7715	8966	10004	5434	9137
1290	33	-10	86	207	-6	40	22	-57	-9	-38	44	-25	101	-24	-24	-20	1	11	-24	77	-11	-40	2	35	33	69	121	45	147	-26	215	34	5	-11	-31	-67	328	67	8	-70	-125	-72	-18	42	-50	-66	119	167	233
1291	847	170	605	889	559	1217	732	570	737	238	495	798	383	2131	1105	527	691	655	1123	1107	944	776	483	1220	1276	683	1247	1006	1008	740	1029	1346	201	927	407	422	1238	1349	1014	1015	232	1011	1115	1246	1322	866	1316	1240	378
1292	7	-113	11	147	25	79	124	-187	-72	36	25	38	55	5	21	52	46	205	-44	-3	-41	-87	21	124	70	57	-36	43	-126	189	31	6	-188	119	19	120	-74	243	-66	152	24	-130	-63	30	26	-25	37	11	130
1293	829	427	79	196	241	49	104	3	223	78	91	25	210	332	113	40	63	28	226	123	207	244	244	7	189	518	180	183	274	246	267	88	158	58	105	80	285	159	93	95	154	-126	250	225	80	203	20	190	130
1294	2009	1870	1189	704	1995	1159	1065	2569	2039	336	1214	2134	1089	3489	975	450	2078	1744	995	1956	1909	2047	1341	1117	986	2689	2855	2481	2312	1340	1450	1297	1196	1171	1213	695	3662	3915	1478	1423	1470	957	1532	1708	1933	3635	1253	3090	917
1295	157	78	35	48	387	65	73	23	669	-45	50	152	181	121	108	23	102	83	135	52	109	1259	148	144	-15	190	297	549	-115	68	-47	114	-32	65	215	92	-31	435	-10	73	-203	173	-218	88	108	371	37	106	20
1296	457	888	678	829	902	639	477	1355	797	156	821	931	285	1212	468	281	603	1042	846	747	1000	626	762	352	1128	1360	1211	758	1035	269	1613	958	695	499	356	286	1037	1609	741	402	889	644	1198	1098	878	970	719	1598	432
1297	-30	184	44	-91	44	65	48	114	124	-27	15	109	101	120	8	10	69	57	160	-95	-2	74	48	120	92	127	0	53	-147	106	152	116	72	3	117	-20	243	-33	16	-40	48	2	-137	82	112	640	49	75	89
1298	279	201	139	173	495	95	193	127	514	17	152	235	85	414	151	67	179	66	236	10	346	242	181	87	261	209	58	148	208	-125	383	235	271	66	11	127	497	268	208	149	9	29	13	116	69	926	79	249	-24
1299	132	10	104	342	31	155	756	415	312	-110	936	-82	135	376	251	570	74	103	32	1857	748	34	670	148	287	263	700	710	2937	880	940	337	408	174	0	18	-84	50	2268	111	333	779	2372	230	1176	357	255	1357	707
1300	722	62	547	222	-203	391	392	476	366	577	336	636	170	602	254	409	175	17	278	172	361	485	433	71	521	521	445	408	213	220	162	79	225	456	19	538	444	402	643	136	324	524	419	262	428	431	225	335	226
1301	132	26	104	231	76	150	137	509	72	-48	155	18	-79	-65	-27	109	29	346	160	197	216	-104	161	156	-196	317	212	242	-16	182	462	90	-1	181	15	87	539	-335	101	70	266	17	-2	248	226	-107	167	279	164
1302	20	-87	70	57	1194	46	195	358	-59	55	127	44	5	-122	36	160	41	199	-3	306	438	12	399	227	-51	746	239	58	-323	189	951	53	-232	-13	-90	-136	-1958	8	304	-272	125	160	-358	143	192	-58	74	125	223
1303	366	1029	244	140	19	175	543	899	307	73	333	554	463	1012	571	220	506	1126	1632	1244	893	587	820	312	1378	1964	870	751	1298	622	2369	597	743	487	270	420	1323	184	910	397	638	625	654	299	908	865	811	909	367
1304	3383	1039	1950	521	1143	155	2623	4126	832	-15	430	3744	346	8287	564	1124	3370	1002	487	2432	402	7887	771	3976	2641	953	3523	1770	2186	835	3541	406	390	2415	403	1003	3250	2037	1708	1208	904	1142	1406	1838	2386	2450	2587	2634	-85
1305	1	10	-48	-136	-451	124	59	-16	-97	-24	-35	-65	-247	-36	34	24	2	-167	-26	105	358	-143	12	61	72	-136	137	-2	-290	94	-262	-269	-265	-23	-101	-94	211	-184	5	2	130	160	-230	-69	0	68	-102	137	-793
1306	412	62	250	9	-184	171	24	107	103	149	208	139	53	147	135	75	64	-115	126	-28	210	15	76	118	122	279	121	84	21	-56	215	282	75	549	58	-62	645	-176	80	198	43	70	-106	1445	108	255	1319	-22	-20
1307	70	53	-17	-13	-76	102	15	80	-51	-5	-76	17	74	-163	-10	-58	13	-83	-10	84	76	-52	-53	35	-27	-60	32	58	-186	22	-89	-20	11	-5	-97	-154	-243	-343	-29	-65	-43	-89	69	25	24	-2	31	-55	-254
1308	83	35	11	80	6	105	31	164	70	-17	-5	25	0	224	154	4	63	20	77	59	251	26	-19	-43	315	88	65	71	98	-53	105	209	167	13	-46	-39	10	-134	77	182	188	0	-13	-50	101	156	55	89	58
1309	643	232	108	-39	-355	107	130	-46	-35	217	-96	573	-149	-118	25	86	23	-34	32	-10	59	159	-3	-92	139	123	134	416	-263	-159	42	33	1195	287	-90	13	-158	-108	157	-5	-130	-12	38	-162	177	179	-28	-237	-27
1310	446	893	472	413	673	337	324	701	800	188	160	596	412	1918	549	321	959	707	754	701	595	994	442	249	1301	568	1339	465	1074	212	830	1103	931	533	387	342	730	679	789	1044	836	529	1036	399	715	1075	331	898	113
1311	-6	159	33	-93	-254	-8	-86	254	953	257	61	177	261	654	331	63	101	164	517	243	150	264	130	-106	549	-702	550	204	257	-413	425	776	323	178	152	127	-158	-846	-117	-57	324	-81	469	196	294	469	7	993	622
1312	127	876	212	95	203	114	239	338	1271	151	225	671	178	4614	813	386	714	612	1464	571	482	962	320	73	2190	753	1653	572	1211	91	2643	1583	871	487	328	106	2201	846	939	715	769	396	596	274	826	1926	249	977	79
1313	627	856	6	22	622	47	8	73	1609	50	712	6	26	40	1692	120	46	34	659	112	198	149	464	189	657	15	284	109	115	98	315	267	51	26	414	-67	296	-368	0	470	19	-104	-108	115	198	510	76	279	103
1314	-90	-87	-787	-433	-1264	-245	-250	-1039	-495	-172	-207	-607	-301	-877	-302	4	-578	-173	-933	-528	139	-379	145	-502	-421	-232	-412	43	-274	-778	-924	-710	-597	198	23	-455	-592	-628	-154	-209	-904	-235	-769	-208	252	-670	138	739	-745
1315	161	447	290	364	2319	218	315	419	227	235	307	614	370	1363	460	84	284	647	201	842	1039	1106	234	306	1154	1932	1005	1147	663	-170	525	607	180	163	7	94	-317	234	370	280	846	139	512	62	987	300	138	912	27
1316	215	419	332	22	152	243	270	161	340	159	240	418	309	1005	367	229	666	161	552	116	541	757	384	193	657	756	530	370	564	110	341	546	228	284	176	134	349	268	373	198	338	235	106	204	189	662	243	408	182
1317	125	258	77	11	184	168	119	248	225	47	160	171	159	506	407	192	126	101	415	264	328	363	195	-5	551	292	432	155	476	-49	415	298	167	185	199	64	349	100	226	152	198	104	194	35	166	461	119	366	54
1318	196	321	539	-39	425	223	357	436	974	227	233	1169	333	2259	920	338	834	713	919	95	136	1535	209	31	1264	346	870	263	312	-186	462	1039	640	338	125	538	307	209	296	342	681	383	218	10	455	1283	211	257	-10
1319	330	-30	159	532	622	376	370	1096	223	-8	337	278	378	272	222	195	273	153	96	941	1187	173	737	547	222	689	402	799	855	360	993	384	405	320	262	189	-148	519	277	174	304	364	462	408	550	621	395	1419	436
1320	477	509	301	289	260	144	279	298	301	72	172	337	205	243	207	147	245	112	302	405	402	802	873	539	313	483	740	1563	345	360	436	495	146	451	970	73	1037	452	314	65	565	323	112	1086	312	524	416	557	237
1321	147	355	228	-85	527	-27	359	415	191	129	138	18	-85	233	198	150	183	309	232	765	565	136	276	476	427	584	127	334	822	3	982	41	183	263	78	284	-518	25	336	89	565	310	702	103	539	486	356	1052	99
1322	854	437	159	-71	851	86	91	352	108	60	154	805	-31	548	348	184	276	268	169	289	757	467	291	51	646	381	412	114	-87	231	719	411	261	838	387	-2	-518	653	728	136	38	-47	557	250	-41	922	677	442	171
1323	-107	-271	-115	-28	-311	-59	-159	-140	-244	-210	-274	-258	-127	-549	-203	-107	-316	-430	-326	7	100	-151	-171	-65	-342	-301	-409	-255	-186	-243	-341	-513	-222	-85	-78	-247	-243	-343	-277	54	-106	-158	22	-186	-346	-190	-171	-302	-79
1324	490	462	317	392	927	617	550	1003	1025	367	708	849	530	2142	674	410	849	574	1009	1117	1450	1743	526	500	1473	883	1119	769	789	11	714	826	481	756	140	305	635	1215	904	522	1010	557	1015	512	1412	1303	483	1226	357
1325	35	56	24	-80	63	56	-4	90	28	-2	44	4	21	-489	34	-6	9	-23	54	165	263	-65	87	87	-15	219	-26	40	191	-87	47	-22	-122	6	148	71	-264	201	93	57	251	111	2	44	63	41	111	123	89
1326	-11	-90	-11	-44	355	4	66	0	-28	33	-25	-51	-101	-247	5	-9	-90	-63	-96	-49	139	-30	-46	43	11	-197	-55	-17	-252	94	15	-77	29	-107	43	-39	148	-134	8	-2	-53	-100	20	-89	44	-58	-77	-243	41
1327	154	238	-354	-592	-2306	-214	-246	-291	144	156	11	172	-343	57	11	735	-29	372	540	250	-284	-188	592	373	2186	-330	-291	-421	-1090	-2039	10	1421	-41	630	-320	-288	-2657	-1383	-571	-1009	-1392	-239	-410	534	123	64	307	-1665	-1030
1328	-173	-710	-35	-396	-311	-89	-159	13	-327	-20	-66	169	-199	35	-142	10	-343	-77	-528	88	103	-157	-60	13	-53	-460	-225	-183	10	250	-956	-352	-195	74	-62	108	-391	-402	80	-503	-33	-44	-65	-204	31	-169	-138	-795	137
1329	337	942	563	747	-120	216	124	956	491	288	492	464	687	700	468	390	686	441	680	1233	775	91	730	266	872	1319	435	390	1156	387	751	526	211	222	195	494	825	192	856	400	773	177	1230	304	704	439	292	649	707
1330	103	56	128	198	-38	114	26	87	78	-8	33	11	74	285	103	23	55	306	278	172	145	67	20	9	336	340	340	89	208	-64	415	186	347	171	148	36	539	108	157	185	372	278	248	113	164	180	50	-41	261
1331	139	752	239	179	317	63	110	301	11	58	-2	106	53	770	322	23	167	649	384	165	145	126	94	81	772	308	471	71	32	182	173	152	211	101	23	53	328	25	354	65	174	-12	223	59	200	310	113	67	-27
1332	1173	2058	2433	2033	2293	1760	2737	5042	1342	839	3352	1647	4981	2919	1536	1176	2509	2518	1309	5316	4120	1172	2314	4384	2371	4125	1630	2287	8325	4818	6011	2068	1512	1742	1201	2500	4668	4979	2994	2604	8503	2731	3458	2961	2444	2314	2349	4442	2652
1333	836	564	408	213	1919	432	470	929	437	104	337	538	668	2033	445	326	747	378	1275	1614	674	2188	716	409	1481	1411	2200	1252	1753	224	1860	499	424	436	297	404	1587	695	1766	653	846	199	1991	485	1165	1942	561	1662	189
1334	411	248	736	362	324	234	515	479	528	170	520	654	1177	1056	409	295	286	1308	237	1667	852	515	750	769	768	1277	733	587	805	1978	1476	795	1	407	223	642	42	293	1112	438	730	852	1237	399	706	712	723	635	560
1335	49	51	66	-72	273	72	157	-33	107	13	-41	1708	-37	172	177	-13	143	46	183	278	162	88	3	85	510	-212	3	58	71	148	178	218	68	47	-54	-55	-169	-335	50	-65	33	57	49	62	84	333	44	-61	61
1336	-629	-455	201	-936	-3806	227	-652	-442	-95	-139	-209	-472	-1332	-1002	148	-415	-722	-1120	183	-3624	-2732	486	-673	-1261	-947	-9208	-841	-2552	-2740	-3675	-278	-1114	-333	106	-457	-573	-1799	-796	-1102	-214	-1015	-1238	65	27	-618	-1003	-4044	-949	-1522
1337	37	192	106	74	177	81	46	298	199	66	-2	102	66	136	130	64	125	66	194	98	145	20	117	100	126	50	140	130	405	224	662	240	102	49	70	127	137	50	154	100	435	51	205	71	162	192	108	347	154
1338	-261	77	-468	-624	-2166	-166	-421	-1385	113	-251	-736	-358	-426	-218	107	-312	-116	297	-35	-1586	-1178	-152	-585	-458	41	-1443	-779	-702	-1392	-653	-2185	-1326	-638	-362	-285	-275	-2159	-1156	-651	-587	-1388	-368	-1327	-800	-505	37	-699	-151	-75
1339	-40	-571	82	-119	-641	259	-79	-93	-566	-111	-517	-177	-178	110	-91	-312	128	187	-82	-976	-526	-30	72	-59	-153	-1296	448	574	-2373	-508	-993	-950	-441	-71	11	64	-3737	-1056	-435	-2043	-469	432	-149	-683	-492	508	-483	-229	99
1340	201	144	-8	24	502	510	186	167	715	160	197	687	205	2222	528	172	435	979	788	528	680	97	469	229	1762	162	674	431	624	398	888	896	323	408	-19	372	709	905	1499	400	275	209	4	225	561	927	180	526	474
1341	-995	-784	-1939	-2560	-3107	-1123	-1291	-3988	-1336	-666	-1867	-1593	-1984	-1211	-672	-824	-1712	-2830	-1171	-2623	-2063	-548	-1504	-2108	-1684	-4106	-1777	-2159	-3864	-3709	-3736	-3496	-684	-1200	-1370	-1118	-4954	-2800	-1518	-1110	-5736	-835	-2824	-2034	-1071	-1862	-2425	-4370	-2745
1342	63	-55	206	-65	19	163	-22	228	45	31	160	-66	82	-93	-12	80	-25	20	50	95	159	-29	-43	-19	-23	22	-42	20	268	280	63	46	-69	-14	-137	-55	-21	-108	21	-95	324	85	228	-86	-5	-45	-120	251	185
1343	560	983	1147	558	883	173	586	1962	1074	300	1134	1025	301	1075	753	349	1358	892	925	1378	1628	521	1688	749	1102	2046	1712	1523	2789	375	2806	1025	843	702	520	734	984	653	915	642	1407	617	1819	1508	887	1706	947	2192	680
1344	31	-23	82	143	-209	81	95	231	78	19	103	-25	-50	-196	37	30	-13	164	388	45	29	-4	75	-73	307	-219	58	63	274	-136	246	73	153	125	164	53	-169	871	120	89	140	149	178	74	52	185	49	237	-134
1345	39	563	57	-80	-222	111	259	60	117	64	115	153	39	290	115	27	86	170	245	56	-5	45	110	108	147	54	232	61	268	205	483	229	-32	58	39	94	370	159	-5	13	19	128	307	18	125	128	34	165	-89
1346	1476	665	1317	521	406	954	1300	1113	1214	468	656	2550	751	4055	667	689	1411	615	436	599	1311	2767	1176	545	1504	807	2472	955	1079	330	499	1326	344	1171	426	1079	910	955	1849	1042	1068	1013	909	606	964	1942	714	1315	336
1347	-68	1257	1013	932	2008	461	108	707	585	578	1168	383	756	1721	47	550	-172	1813	1069	1117	1737	694	976	1002	1750	2479	1925	94	2422	1655	3536	2078	645	216	548	1021	3133	3655	808	1371	1915	302	485	1044	1236	1475	577	2516	1085
1348	479	189	88	13	63	115	55	261	268	34	149	141	213	178	81	66	150	147	159	165	201	197	207	272	177	473	304	258	295	201	415	272	235	90	-66	115	190	-226	120	97	401	192	-60	226	127	525	128	428	34
1349	-114	-253	188	-500	-273	-20	68	-114	-343	-54	-80	-115	74	92	-59	-24	-39	358	-273	-77	287	-33	-69	-245	-171	-778	-347	-94	416	-7	-52	-264	-296	163	-262	-268	-688	-578	165	-361	-706	152	611	-138	-73	151	192	235	-130
1350	218	139	252	-222	1201	185	28	452	162	111	347	74	298	233	-204	63	59	444	-36	782	340	920	47	-5	185	177	412	102	-169	-208	940	258	22	-46	97	110	550	-259	170	-16	96	40	212	199	550	140	88	159	-48
1351	121	160	44	76	209	160	59	137	170	71	191	183	210	311	95	106	78	277	203	35	183	166	175	266	163	546	212	222	498	326	246	160	157	131	125	122	561	612	192	250	149	132	94	76	191	293	231	341	72
1352	2076	1329	3549	2013	1887	4027	1778	1385	1265	4048	3204	4502	5677	5682	836	1346	3698	1568	535	1530	725	3978	880	379	88	1420	730	1339	537	440	362	1280	868	328	360	3254	222	2129	1441	1164	459	1868	1189	550	1331	1733	305	369	594
1353	-14	-113	-70	-136	-209	-24	6	77	-75	-68	-34	-45	7	-154	-25	-12	-51	-28	-56	-88	-17	-79	2	63	-5	-143	-98	-56	-60	-136	-262	-94	12	-37	-70	16	-179	-142	-114	-73	-251	42	0	-79	-31	-4	-92	-181	34
1354	122	429	357	-18	330	-88	86	13	283	165	-203	-96	-106	566	396	29	271	563	583	-306	-293	371	-215	-302	583	524	130	516	21	417	252	482	499	459	117	150	211	-310	-10	315	851	57	365	284	-20	543	379	156	164
1355	65	209	31	-65	-12	127	28	184	79	-6	120	49	42	69	50	53	28	155	240	155	-47	54	16	134	88	222	265	89	224	182	294	98	93	-122	-23	36	-21	-217	26	0	48	-12	13	33	86	115	14	181	140
1356	15	40	17	-99	88	33	-79	-248	-172	-10	-82	-34	-175	261	-45	41	-66	314	5	-239	-133	134	-33	-144	70	-572	19	-137	-93	132	78	356	208	73	86	-194	751	419	13	-38	367	-21	126	167	125	-23	-1	142	-144
1357	423	1947	485	259	603	488	406	724	1479	242	241	1100	604	3124	2046	321	1223	840	1612	990	719	2524	756	539	2375	1420	661	291	515	812	1387	1762	647	401	735	570	1048	1140	776	658	570	407	918	458	1090	2370	402	823	264
1358	259	640	406	321	279	352	446	506	411	355	356	635	471	802	528	393	446	407	530	557	278	860	326	255	1002	1131	379	281	652	216	488	486	594	515	320	432	158	402	445	250	333	366	465	333	419	604	352	554	178
1359	682	2028	2804	2543	4244	1200	1505	3747	1417	458	1750	1169	2962	4058	1523	515	1954	1773	1466	4093	3510	1819	2702	2549	2517	7876	1817	2496	4834	3037	3331	3428	1715	1766	1006	2045	4859	5784	2233	3578	4870	2084	3761	2053	2886	2625	2932	4574	3024
1360	-47	306	11	-31	216	192	390	909	18	-4	19	65	69	1472	40	-44	205	138	191	578	32	39	97	725	96	1824	723	209	38	79	168	11	103	1394	140	362	434	134	45	165	454	171	11	927	771	179	1632	576	34
1361	-47	-134	-13	201	-88	-27	-15	-191	-102	-58	-59	-74	-45	-408	-52	-6	-80	-54	-124	-155	-17	-114	-46	-39	-112	-120	-101	-10	-186	-136	-257	-189	296	-87	-15	-108	-63	511	-64	-5	-203	-32	-18	35	-103	-149	-29	-81	34
1362	524	1111	483	248	724	104	344	258	656	114	529	812	205	1581	561	295	587	1060	980	528	503	1004	541	310	1766	689	818	380	65	375	1156	1108	772	219	332	143	1111	838	445	778	503	239	670	568	1009	1790	425	769	302
1363	174	48	-48	149	38	117	53	73	193	52	78	124	122	138	94	169	69	181	511	0	41	51	276	239	1057	120	-52	125	-54	-178	304	120	222	291	27	57	0	125	189	127	648	122	45	159	138	339	46	207	30
1364	269	590	383	575	355	817	490	496	1264	286	608	1397	175	2241	549	564	1399	753	1157	394	396	3002	121	393	384	394	1709	373	794	182	993	1011	501	748	133	138	1206	377	661	266	536	158	754	409	811	1191	270	573	123
1365	819	1382	1051	902	768	243	737	2898	699	1116	1283	789	1342	2196	932	427	1409	1686	880	1286	1438	1400	933	907	1018	3162	1555	1132	3102	250	2716	1982	970	722	1972	342	42	1064	1678	-911	2873	947	2420	1325	987	633	1274	1021	1460
1366	-28	-110	51	93	-158	44	-55	-83	-116	-46	-105	-17	-26	-30	-105	30	-341	-98	-141	158	-59	-83	14	-47	-49	-104	-104	-25	180	-178	-183	-239	-183	-9	-140	-18	254	75	80	-78	-232	-49	92	15	0	-129	-71	134	182
1367	135	263	35	-65	3310	724	59	-174	319	107	207	351	7	569	279	41	139	511	315	98	704	385	376	170	612	292	170	316	361	-64	478	266	110	95	234	362	465	662	117	204	420	2	112	143	222	716	92	856	20
1368	50	144	70	325	50	-47	-11	-63	135	33	60	78	205	170	40	58	63	63	213	239	-68	87	107	90	70	305	91	178	120	15	283	201	198	58	-105	-2	328	-8	56	152	222	42	88	123	63	79	40	218	20
1369	942	1176	1089	-207	578	494	701	1526	1120	187	1087	1704	476	1873	900	684	1037	834	539	722	908	1404	588	371	1455	1102	1470	1259	1183	505	835	1117	557	1044	610	503	529	595	1278	800	1093	231	1061	665	621	1572	758	1620	432
1370	2924	11148	2089	4515	2598	3560	1884	1925	4826	7038	2758	11535	1726	9063	4404	2295	8584	1868	4931	2192	1562	10605	3518	2238	1282	4297	2282	2328	2345	2688	3121	9085	6825	3193	6079	3004	1873	1659	3394	2484	1634	4036	2492	2251	2049	6815	2477	1324	1494
1371	25	67	2	207	-216	-11	26	117	39	-43	74	90	-5	87	25	32	-3	124	89	84	56	51	2	118	78	-15	104	160	49	113	210	74	63	7	113	99	232	251	64	16	130	14	151	60	91	49	94	212	89
1372	1193	82	257	319	114	223	375	711	297	235	175	1237	439	1124	495	209	307	75	239	1107	1092	558	615	193	476	940	193	784	186	406	1035	447	137	565	234	318	1111	1274	507	-5	657	321	693	362	370	1259	325	565	278
1373	-274	2931	6085	2616	38	4349	4266	-415	1764	1757	2402	5914	37	6612	2628	1493	7745	-479	-517	1593	-831	5993	535	893	957	1083	1155	830	-2987	-660	-683	2268	586	4657	2513	1927	-1672	2942	3656	1834	-178	3629	-889	1488	1408	5496	1271	-464	-1501
1374	329	276	319	28	-216	79	8	332	775	160	279	385	55	388	449	49	310	941	583	518	204	428	-28	207	516	918	363	265	-750	-208	614	631	469	150	11	27	-349	16	-170	-21	-396	186	85	289	-103	670	2	363	-360
1375	10	-90	-6	108	0	24	-6	-10	-41	8	7	18	-29	-175	-4	0	-40	-28	-3	-91	14	-72	-33	-39	9	-34	85	-30	120	159	-157	-40	-137	17	46	-99	84	-125	18	95	-149	0	13	-37	14	14	11	-2	79
1376	661	370	306	377	584	255	315	929	1216	490	454	975	303	673	1233	100	460	251	468	962	550	466	824	431	555	1185	740	237	1786	349	725	575	413	449	328	342	518	670	595	163	856	516	1131	379	520	606	771	1061	24
1377	62	120	215	54	12	15	99	30	30	8	12	79	106	499	106	15	125	-225	132	98	29	228	-5	126	153	12	72	99	65	-91	68	118	53	87	113	131	434	33	106	21	91	-55	27	-59	106	169	2	72	61
1378	211	95	-53	-173	152	-7	-19	90	-114	133	-17	671	82	-272	18	27	24	54	-48	31	5	-12	-48	17	271	168	255	631	-76	7	-194	11	-120	175	187	80	-201	108	29	-10	130	147	20	-125	26	18	208	36	-51
1379	-9	-72	-48	-171	-127	-27	17	-150	-3	62	-30	116	-69	-13	-10	-4	11	37	-13	35	47	126	26	-67	7	0	-62	-51	71	15	-36	-27	32	37	46	9	285	461	-64	-59	-19	-68	-88	3	-9	166	183	-92	-51
1380	1046	1503	1459	323	1194	762	1349	949	1316	207	1169	1158	927	2310	883	909	1250	1695	1499	1674	1243	2802	899	413	2702	1201	2793	1323	1118	725	709	890	654	1080	450	450	2434	922	1708	990	1030	846	1424	374	1994	1390	611	1797	147
1381	503	650	59	127	711	430	170	392	310	80	512	1319	285	1293	456	370	328	947	955	588	503	731	404	336	1400	495	1041	521	219	170	446	797	364	685	266	642	899	67	429	522	575	332	158	216	663	1475	385	543	-48
1382	507	859	885	1022	-76	275	206	2781	1072	67	320	958	658	1875	803	40	748	918	744	1258	609	739	1342	393	1437	2294	1051	896	1101	-326	1056	867	850	319	113	314	582	301	677	255	1296	340	905	1349	625	1401	535	621	817
1383	425	-46	195	85	44	178	175	150	54	135	64	206	173	402	82	73	178	-135	115	359	124	297	110	17	33	235	248	122	252	117	10	129	102	242	19	203	232	-50	288	119	164	143	212	106	84	155	258	125	65
1384	34	154	-19	1	235	49	35	23	38	-2	13	88	-61	274	72	21	76	54	105	63	-41	220	-17	-195	102	-60	55	125	38	-18	194	89	110	42	-43	85	190	-92	72	190	14	-81	106	-49	22	93	64	-159	-13
1385	-24	181	-17	-190	381	-75	-66	-20	-19	46	-45	25	53	72	64	-10	-40	-20	94	91	-2	69	3	-148	131	165	16	-5	460	11	-10	58	124	45	35	-50	137	461	-10	38	-130	-147	352	-59	-24	23	-55	-288	54
1386	210	120	64	46	-19	-2	15	107	23	24	27	49	47	44	48	60	0	75	24	225	47	33	75	114	23	190	85	53	235	-30	-15	25	293	-23	35	-25	-285	67	0	62	-4	117	97	55	168	16	13	13	-44
1387	710	988	417	512	413	420	330	382	390	259	478	866	266	1231	698	300	792	803	754	722	346	783	541	413	1229	756	965	592	816	-7	777	896	474	709	508	443	412	503	685	587	619	467	652	531	871	1000	428	652	336
1388	88	2071	-4	181	3164	539	4479	543	2977	142	199	60	135	9471	1471	956	585	1337	244	2129	2258	403	1607	110	14204	2288	7216	592	1430	3068	2264	4380	1812	375	3487	80	7834	5625	2367	4013	8890	1088	2932	223	5634	3682	331	9602	1041
1389	94	690	217	85	57	139	204	573	509	96	199	250	418	925	322	63	509	673	690	532	364	168	156	249	811	1036	399	150	767	227	751	496	299	224	27	154	-412	544	192	-24	207	139	535	272	593	475	144	596	140
1390	134	181	99	-33	324	121	110	20	5	4	115	-37	-15	18	68	60	233	2	124	7	62	6	154	55	196	359	91	74	43	121	99	190	-107	53	27	104	402	234	101	-19	169	-85	22	71	67	260	16	145	147
1391	160	-162	-42	78	-108	-11	0	-6	202	-2	19	145	7	-52	178	0	126	-86	206	28	334	4	20	19	185	165	160	45	82	-148	168	167	-269	141	144	0	285	-251	-72	97	62	-77	103	110	16	241	43	235	185
1392	263	-53	119	-14	254	129	344	207	140	-67	30	499	106	932	192	176	182	92	187	-21	76	1091	-58	31	281	-276	491	130	257	174	136	76	-5	258	-11	46	127	25	189	144	-145	-34	38	86	46	260	-71	-67	161
1393	300	315	93	115	228	169	82	120	312	-8	29	64	181	184	199	86	-2	75	226	-66	222	411	5	27	273	57	304	201	213	269	168	527	427	101	109	-43	127	503	58	272	159	87	187	52	9	419	53	425	209
1394	4284	6223	3088	1100	3946	2203	1593	1791	3074	817	1620	3985	578	4121	3343	1424	1351	2654	1769	1223	2714	3154	1333	725	5308	2393	2085	2675	2197	1496	2522	5056	2202	2246	1988	811	1513	5843	3656	3265	3685	1424	2336	2316	1987	7629	1252	4960	1780
1395	5	-23	119	54	1264	230	6	355	-1	112	58	140	-98	1031	251	-3	104	138	69	1759	435	-2	48	79	263	-9	569	293	1370	-30	1613	21	-122	314	-19	140	391	435	1040	21	802	89	862	62	256	159	-26	1215	82
1396	-106	-236	-153	-960	-400	49	-48	-560	-181	-89	-160	-158	13	-220	-2	-9	-109	-25	-91	-66	195	-102	-108	-27	-137	-308	-252	-15	-778	-106	-241	-186	-244	-114	-199	-27	-688	-25	-88	-73	-382	-109	-453	-96	14	-155	26	44	-79
1397	123	393	414	424	82	121	142	462	337	48	302	152	295	169	183	113	383	543	241	352	509	109	303	308	514	953	569	347	43	284	1140	303	222	89	254	328	-84	301	138	68	324	220	115	3	181	329	379	627	185
1398	48	13	-11	-14	108	-27	157	50	0	41	8	30	-82	-31	29	-13	-4	-20	30	-66	-2	45	-23	-15	1	-19	101	53	-49	-87	-68	4	-45	42	46	62	63	469	21	48	-232	-96	81	-55	22	52	-83	123	-37
1399	917	574	441	321	158	329	295	402	202	232	278	770	394	2138	532	360	311	294	475	518	1634	949	500	-29	3375	266	897	352	49	106	525	431	2946	393	324	485	772	871	984	329	778	921	422	358	670	1099	261	1007	54
1400	434	890	219	278	-228	52	86	161	1188	194	843	1022	-181	242	535	256	369	335	153	-257	118	844	444	37	653	-425	101	-94	-153	-113	-57	381	459	680	763	39	-116	-394	-24	416	-275	-10	-2	492	359	1462	268	495	-54
1401	-168	-948	-470	306	571	57	-2	-100	-623	388	58	-347	-63	-87	-69	-115	-164	-184	-544	-394	701	-328	-382	136	-323	1595	-445	306	-794	-580	89	-724	-263	-228	-140	663	-148	-595	69	-307	-48	-209	-672	-426	305	-653	-295	-106	-237
1402	1216	797	634	-80	95	685	1101	1610	883	429	1197	971	1814	3285	1141	775	2881	823	761	1357	1039	3546	385	2070	1737	381	1044	1032	1074	64	210	1843	1744	1569	489	954	-666	150	1665	283	9	1975	645	1503	977	1580	2092	111	391
1403	533	2148	4494	719	2255	706	1620	5048	2270	731	2112	2262	833	4555	1704	710	1883	1626	4320	2513	2741	2608	2226	891	3614	731	1964	712	1589	778	1508	2957	2275	1360	634	656	8098	3479	1329	3769	2099	1954	1733	1691	2995	3326	1931	4543	560
1404	64	-82	-31	1	-88	108	157	275	214	45	50	360	146	1213	275	250	177	413	208	105	192	16	108	174	929	-343	422	260	202	106	183	393	242	218	86	164	-31	-41	200	187	135	72	94	-177	410	557	141	117	137
1405	-364	56	-199	-263	-590	-452	-217	-714	-286	-110	-315	-402	-364	-889	-172	-263	65	-1031	-242	-1590	-535	-114	-614	-603	-234	-855	-9	-398	-1271	-1089	-183	-1062	-126	-347	-211	-624	-709	-695	-69	-348	-58	-293	-257	-448	-249	-291	-550	-503	-329
1406	152	98	157	413	1137	162	137	466	127	-13	211	244	-13	-57	301	75	158	112	83	416	254	45	271	367	61	171	-157	408	427	478	504	242	183	224	82	184	561	947	141	370	401	173	388	350	200	440	501	660	120
1407	360	149	290	343	616	362	264	503	500	222	351	291	506	328	279	120	274	470	266	-95	372	56	334	316	486	1427	379	505	570	425	698	834	593	283	93	284	857	553	237	198	333	314	467	316	286	688	594	663	378
1408	106	162	13	181	38	175	104	187	143	11	144	130	186	40	106	100	96	205	149	28	239	76	94	-83	118	368	39	53	54	3	304	217	204	27	23	108	307	-33	40	29	-24	-64	214	113	74	184	125	159	82
1409	213	-132	208	188	-641	-56	-17	603	236	-39	-16	160	79	17	32	23	274	-112	148	-525	-20	1091	587	-17	-153	-533	887	2069	175	41	-1408	-91	92	13	532	101	-338	-142	-165	291	-91	-87	-295	221	312	1844	-150	156	381
1410	-34	48	24	343	-76	33	42	130	-24	-33	-23	22	93	47	25	33	6	0	26	-215	14	9	-10	83	70	-63	-19	-12	120	37	-136	10	61	-19	105	50	381	92	-16	-51	145	100	56	49	11	24	-20	-58	3
1411	281	102	31	95	108	172	44	248	52	17	62	148	162	512	159	120	106	98	249	45	230	244	119	19	189	190	340	168	241	-117	47	287	68	167	46	76	561	-142	285	-89	159	32	167	150	288	327	111	389	58
1412	103	-276	42	-48	-158	-52	-110	-93	-100	-83	-89	-44	-61	-97	-110	-44	-81	-49	-216	-363	-139	-128	-81	-108	-80	-241	-180	-120	-104	-269	-231	-210	-43	-211	117	83	84	167	26	-174	-87	-59	-203	538	-58	31	-5	-106	-103
1413	32	-46	64	190	-184	14	-17	36	-11	68	71	11	-95	27	-10	43	31	17	86	-165	-2	-28	83	53	90	155	-45	94	82	-110	15	-51	95	-34	27	-43	-264	117	5	13	256	-124	0	49	44	65	10	-117	-278
1414	72	-1459	-348	-431	-698	-153	-190	-892	-210	-287	-446	-42	-170	-62	30	-32	-225	-687	-776	-528	-423	-297	-503	-7	-74	-1659	-605	-383	-668	-603	-1865	-1200	-712	-182	-391	23	-804	-754	-194	-454	-1199	-302	-742	-352	-344	-140	-213	-937	-161
1415	-100	-338	-252	91	-305	37	24	-442	-228	-44	-116	-42	125	-551	117	81	-158	-199	-204	-7	183	-196	-40	162	-137	-295	-464	-91	164	512	-367	-187	214	-50	-58	-11	-486	645	-64	-5	-217	-85	-234	-66	-125	-110	-191	246	168
1416	9	93	42	119	-101	-4	51	-110	-80	-47	-13	36	34	90	66	-15	20	109	63	-155	5	-49	61	-3	104	31	-62	51	65	11	136	-6	34	-29	54	-85	169	-335	45	38	135	-72	29	-10	13	18	20	-218	0
1417	223	1565	632	-287	527	305	177	1013	1372	72	433	749	527	1978	923	187	820	1380	1300	511	290	1292	855	193	1530	575	1100	695	608	-239	1618	1786	1285	335	-211	108	1355	469	816	683	140	417	720	228	457	1681	152	1500	-161
1418	140	-422	-572	-1171	-1213	-549	-350	-1110	-796	-224	-576	-250	-548	-1019	-474	-266	-693	-756	-854	-468	-805	-560	-117	-369	-777	-1538	-1047	-610	-876	-717	-1975	-1131	-574	-476	-270	-295	-1831	159	-461	-462	-1073	-362	-1072	-721	-303	-335	-355	-1248	-305
1419	419	231	519	-194	196	221	277	281	121	-45	328	3147	396	1396	453	404	540	566	685	595	574	781	313	306	1043	327	402	401	1024	512	273	1220	211	304	238	291	645	595	648	380	652	407	243	436	348	712	391	568	360
1420	336	-46	299	102	355	759	488	670	830	353	372	2312	237	3628	885	660	1831	678	1098	461	902	501	419	480	1563	699	1001	477	597	273	725	1624	570	919	86	522	148	8	725	247	493	242	458	269	606	1898	417	705	302
1421	4034	2509	4339	878	3247	1839	2421	4042	3200	1120	2124	3636	2357	4211	1740	1741	3155	1952	2148	2549	2998	5023	3376	2260	3515	2593	3231	2913	3036	1606	2432	2352	1151	3966	1264	1264	2477	2355	2420	2552	1107	1330	1103	1703	2171	5116	2559	3751	1137
1422	1830	1506	1049	-106	5140	642	530	1861	1333	225	966	688	380	834	1046	270	1033	1025	941	391	1044	1344	1131	599	707	950	1077	1106	1074	235	1234	427	364	1082	962	369	603	1433	883	337	295	582	668	783	734	2941	611	1903	398
1423	475	1729	945	1342	489	169	603	191	1057	340	571	1471	255	3168	987	109	2087	179	248	511	82	1902	380	670	232	422	651	454	246	60	162	1199	99	1094	70	244	-1365	134	736	272	-183	259	-47	961	650	1646	504	456	295
1424	58	214	-44	-171	127	81	-44	167	76	22	45	58	141	103	65	80	21	135	73	183	186	6	229	183	131	123	134	-40	-120	246	257	24	45	83	-62	43	846	259	109	-152	-145	29	72	28	119	93	101	243	-27
1425	200	-836	-19	-390	711	649	-37	-543	-318	188	-249	188	612	1223	315	407	-265	135	-444	613	896	480	188	298	1114	22	740	281	235	394	-383	-1068	-540	21	172	318	497	1794	739	103	899	220	546	-30	788	-204	325	-666	305
1426	11	43	33	-138	-25	39	24	67	-3	38	7	18	-66	108	27	13	27	124	39	-3	-29	36	-88	57	92	190	62	66	-219	53	21	33	80	51	82	131	52	243	-48	16	38	-40	-54	11	-1	45	0	64	65
1427	199	345	827	349	260	408	599	1422	560	82	641	365	1627	1526	439	89	729	242	466	1399	1121	1190	678	506	352	702	1237	1165	1227	592	1692	153	289	405	-62	50	-264	645	1046	-125	454	627	2257	887	796	859	711	1293	360
1428	72	-23	157	28	203	307	190	191	66	144	73	200	135	299	95	120	166	135	278	31	109	57	37	181	407	228	245	68	-109	550	331	206	59	199	43	235	137	737	133	2	193	49	340	106	179	162	129	-75	-72
1429	119	239	93	28	-82	7	135	103	83	116	80	160	-47	87	66	69	85	98	161	-56	32	80	25	63	64	139	173	35	186	-193	-63	89	126	118	27	90	-63	-360	34	13	367	-36	-45	30	89	113	20	-41	-13
1430	297	345	1164	342	730	713	293	966	763	369	376	1044	713	940	370	187	539	69	250	289	352	982	408	324	98	400	500	25	427	368	325	721	177	586	266	427	338	-134	619	269	503	407	507	160	576	512	226	1007	-37
1431	-82	-251	-102	82	31	31	3121	462	-322	-66	-61	-54	2229	1145	-161	-3	-99	-210	-355	317	-198	10	-92	-71	-321	-133	-19	40	-389	-497	-294	39	-157	-173	-148	-85	-359	-846	-61	-54	1228	-201	-246	-296	-176	-232	-197	-375	27
1432	46	-8	48	259	6	13	0	-107	-24	-50	-47	-2	58	-17	-8	43	-54	31	89	137	85	-10	-7	-5	-63	19	-88	76	5	-56	120	88	281	18	0	-32	-105	427	-26	-62	-48	-115	67	-1	-44	69	-44	131	-13
1433	3773	3203	4576	3450	2859	1547	2264	3170	3568	4389	1421	8342	977	12023	5022	4330	6056	4647	4611	3014	4736	8508	3227	1295	2938	3003	5435	5300	4757	2365	2490	7168	3673	3314	1597	2572	2741	2808	5049	3905	2815	2554	3767	2045	4312	7701	2138	4574	2481
1434	113	155	104	140	273	197	106	452	114	69	173	165	213	96	236	103	95	138	113	165	367	138	160	144	143	769	98	393	367	87	420	254	239	260	54	90	169	268	-8	127	333	85	241	128	106	250	222	459	3
1435	58	167	-290	-654	-1347	-10	-33	-677	-823	-235	-202	-43	-458	-136	-237	426	-481	-69	-701	-102	-29	943	-145	-272	894	-2437	392	488	-504	-637	-1113	-942	-444	146	74	-187	-105	-570	451	-46	324	57	182	37	470	-381	-459	-226	-250
1436	125	72	310	330	1054	271	155	613	93	17	434	97	181	333	39	275	2	141	120	176	669	113	216	170	29	613	58	91	657	1010	84	232	173	90	86	342	698	-125	520	1385	-58	267	851	404	222	70	713	1007	415
1437	22	30	73	59	139	18	4	-46	5	-1	51	-27	-2	-19	-2	-7	0	83	65	-130	29	-23	-1	92	-120	-54	26	20	-5	193	-5	39	0	29	70	-2	-465	159	80	-13	-14	29	-11	66	5	-6	92	153	-6
1438	-55	-149	-44	20	-177	-72	-6	-137	-107	-107	-72	-67	-37	-219	-94	-50	-74	-101	-124	-141	-17	-76	-66	-61	-204	-38	-121	-48	-10	-144	-325	-147	-122	-55	-54	-110	84	-528	24	-106	-135	-47	-218	-55	-76	-25	-122	-170	-116
1439	15	90	-2	76	-235	-79	-11	83	-60	12	36	-11	-26	-116	-36	30	-38	-11	37	126	-20	-8	-19	-59	-13	-92	16	12	38	56	84	-32	32	-49	-50	16	31	595	-117	-209	-169	4	-33	67	-7	6	77	-296	-206
1440	97	-323	-743	-93	-1328	-160	-224	-543	-109	-195	-49	-323	-524	148	-24	-41	-809	398	-36	-532	-390	52	-16	-437	224	-489	-13	-214	-169	-391	-1234	-715	-674	-198	-238	-360	-2995	-1894	-314	-1181	-652	-334	-844	-160	-741	-287	-77	-397	-154
1441	183	197	59	-29	44	50	91	144	76	-30	61	165	29	400	289	0	126	77	124	-14	435	71	124	25	149	286	101	273	54	201	215	142	289	15	-11	39	328	461	-24	-78	135	173	115	27	28	144	65	363	75
1442	1323	56	-184	-207	241	85	135	-218	80	-263	-209	-130	55	305	-10	-95	-31	-207	43	183	547	-24	111	-168	547	444	42	306	657	-144	798	73	-87	-161	227	-92	-391	-368	112	-242	-232	-130	735	123	348	179	26	254	-158
1443	629	1480	419	314	2313	107	219	2079	1825	79	1241	684	154	2979	566	481	307	803	669	423	396	5547	5435	156	1638	1023	3428	4904	580	1704	131	2871	1301	330	1937	325	232	3001	435	1311	1431	432	279	123	451	5430	299	-179	1003
1444	37	-11	59	231	279	13	64	40	91	25	126	8	162	45	59	63	35	57	201	81	222	104	-40	179	212	279	127	158	306	262	189	120	-92	75	125	71	296	226	90	106	299	175	232	15	176	83	83	83	168
1445	333	616	228	-18	692	313	306	315	1539	245	476	1380	210	1759	850	301	1679	626	1451	21	153	2789	229	217	588	457	576	378	87	49	378	1430	458	290	207	362	624	461	133	247	193	252	196	260	286	1747	322	167	185
1446	581	809	417	607	273	545	599	691	899	189	442	1006	386	1832	898	513	643	465	1275	458	837	703	805	417	1561	1322	664	385	1611	402	1949	1341	654	539	183	795	328	746	781	291	846	445	1171	490	835	1158	562	951	542
1447	708	536	1100	1246	95	-104	637	1154	412	118	416	919	173	1216	300	501	863	381	368	627	1826	646	1433	259	1469	785	1424	1316	2570	159	1786	1403	286	1002	829	180	243	318	1176	805	836	257	1889	301	1140	1078	399	2542	1436
1448	754	295	738	229	851	459	794	509	1002	288	809	1335	679	1407	616	540	608	421	1079	606	405	572	494	658	742	1169	1185	848	761	436	740	942	312	670	172	640	1079	201	878	478	222	329	537	120	582	996	313	828	350
1449	-252	-194	64	59	184	-237	-110	-573	-206	-46	-100	9	-191	-154	-137	-55	-136	-5	-266	-468	-219	-57	-291	-231	-169	-670	-104	-178	-235	277	-698	-277	-93	-206	-219	-39	95	-167	117	217	-411	-122	-171	-428	-207	-197	-179	-349	-96
1450	211	-186	354	248	139	102	384	1130	-43	96	215	153	314	942	169	136	243	14	-142	733	902	182	208	450	421	559	363	1372	822	-337	283	91	-9	343	-101	381	741	-167	936	-231	962	550	977	523	483	-12	502	414	-48
1451	59	189	137	285	-279	165	66	258	27	-29	60	182	-26	63	119	7	1	106	-134	366	227	-2	101	-11	63	111	-16	347	438	144	173	1	25	133	-109	113	307	461	264	16	188	100	234	20	67	285	183	296	147
1452	180	177	144	211	292	92	24	402	112	104	64	218	29	313	136	140	200	103	146	204	251	131	56	268	340	470	88	68	10	353	283	191	87	452	-66	249	444	-259	328	10	338	246	200	203	149	424	208	260	61
1453	735	271	936	409	184	574	472	600	892	62	1005	1594	162	1001	143	818	490	271	532	454	769	821	353	707	299	870	661	610	432	793	514	251	105	334	144	529	391	-41	432	457	319	137	223	633	324	1079	765	145	570
1454	-774	-1032	-1817	-1588	-50	-727	-517	-2123	-914	-322	-2165	-624	-1409	182	-365	-478	-860	-1386	-186	-585	-1773	-152	-92	-1910	-797	-3474	-19	-1489	-5168	-1507	-3483	-1465	-604	-845	-720	-924	-836	494	-461	-76	-2486	-779	-3560	-2046	-1187	-953	-1435	-2315	-1955
1455	545	241	505	743	330	475	463	1167	375	257	501	578	1238	1608	433	326	618	886	592	1022	920	445	777	856	906	1010	952	531	849	512	1056	723	336	497	70	647	497	1089	541	576	1054	359	1043	694	678	717	753	988	123
1456	773	771	283	897	1073	181	488	892	853	229	249	987	210	1234	419	143	693	378	727	1776	811	331	570	452	618	889	1172	958	2312	406	1513	587	266	593	285	483	1206	1140	1398	938	1383	612	1930	712	728	1421	205	1976	487
1457	-67	-108	-135	-353	114	-101	-133	-177	-127	-83	-71	-47	-21	-89	-18	-63	-121	-66	-124	-176	-174	-108	-87	-209	-11	-330	-186	-7	-241	-318	-99	-261	-92	-65	-234	-140	-307	-117	-146	73	-628	-89	-320	-269	-1	-103	-105	-277	34
1458	-53	33	-108	-5	-127	-147	-157	-607	-103	-67	-313	56	-165	173	63	-175	-93	-5	-29	-564	-361	0	-253	-90	175	-826	-19	-219	-356	26	-777	-218	-41	38	-160	-124	-666	-276	-189	-89	-362	-192	-241	-179	-123	49	-353	-501	-274
1459	80	-134	-22	52	-622	34	113	-184	-91	-30	-176	-96	181	-49	33	24	-168	245	-158	208	245	-42	85	106	167	-247	-22	439	274	440	0	-22	-197	232	-35	129	-296	385	-26	699	120	87	176	126	153	-115	377	-296	206
1460	-19	53	-133	-302	-184	-24	55	-103	-109	-25	-74	-46	-95	-112	25	-4	-69	-14	-108	-70	-207	-55	0	25	-133	-422	-81	20	-175	-18	-78	-103	-58	-62	-97	-39	-84	-209	-37	-155	9	-6	-31	-3	-61	-50	-113	53	24
1461	62	-56	-82	-22	-152	-36	13	-499	-458	-211	-191	-62	-157	133	2	104	18	-20	-46	-232	-248	1	-249	-142	25	-810	-235	51	-449	-246	-656	143	-163	7	-148	-127	-391	310	-253	-65	-551	-34	-544	-275	-121	20	74	-951	-99
1462	124	688	370	482	368	121	166	167	194	18	156	61	87	236	157	129	59	184	345	320	94	153	273	270	269	533	117	528	1112	683	514	211	672	199	156	140	1122	-637	96	340	696	107	379	281	249	317	365	1002	463
1463	1452	1121	465	484	1309	508	304	1234	1256	317	749	1556	282	1624	927	375	2369	644	1432	539	423	2207	521	917	1213	1738	920	766	394	368	1282	1287	623	670	46	277	1164	620	483	639	348	1268	607	584	389	1538	507	1122	371
1464	-17	-147	-28	114	-120	-5	-91	43	-43	-38	-39	-14	-7	-101	-40	49	-27	-25	-75	0	-20	-26	-28	33	1	-216	-104	-25	131	-26	-94	-47	-25	41	-66	-9	95	16	-74	10	-154	19	6	-16	-52	-27	2	-22	-116
1465	-57	-90	-188	-396	133	59	506	-305	98	170	49	126	82	-36	283	190	-12	86	182	789	491	274	193	114	685	-44	0	682	1436	-178	683	-56	-217	311	148	9	169	-268	995	247	-154	473	1119	71	822	224	104	349	-3
1466	104	226	-130	-725	-139	30	-64	-426	16	19	-59	184	-103	-27	53	50	-50	1617	-70	-109	-136	-19	-48	-108	116	-187	104	48	-345	-106	63	78	-113	267	-23	60	603	695	13	114	-561	21	-200	3	-29	143	-35	-260	17
1467	18	83	-75	-349	95	-37	-59	-36	-16	-17	36	-13	-37	-138	-17	-36	-18	-49	5	-70	-38	28	-29	-35	-5	-66	52	30	-5	-102	26	-69	465	-58	-43	-34	-169	-150	-88	-54	58	-51	-126	-5	-13	-9	38	-380	96
1468	9	-18	-70	-44	190	-21	-37	-13	-60	60	18	3	5	-9	-10	21	23	80	101	-3	8	-22	75	114	86	98	22	58	115	-79	94	101	119	-21	-15	-34	328	92	16	-32	174	25	-27	6	35	46	-40	137	-213
1469	-28	536	133	-65	406	102	110	325	97	-45	35	54	215	669	81	73	90	153	189	391	139	178	263	39	551	375	232	237	361	193	698	226	493	163	27	113	296	494	288	331	290	94	365	77	451	343	173	249	89
1470	37	239	148	168	19	113	37	218	66	-1	61	55	269	286	83	40	135	46	40	137	35	91	165	7	17	-123	72	109	131	277	336	78	235	-33	-7	-46	391	134	29	100	140	119	395	110	129	147	65	716	3
1471	11	181	916	-188	959	842	-155	-553	855	-13	-8	688	572	-169	-29	-89	-107	17	-35	243	-559	812	277	181	-68	-317	-36	-91	-1003	-436	-178	22	-11	115	-7	392	-127	394	253	244	-662	252	-638	336	-104	119	31	-288	-560
1472	221	202	115	-26	-108	-100	-37	-184	117	38	-258	136	-293	202	86	6	-81	202	-82	-141	-11	199	-151	-170	191	-232	19	-344	-71	-550	-131	51	-17	113	46	-60	-190	-326	53	97	-343	-207	-722	-265	-41	218	-1	153	13
1473	929	972	798	355	324	462	492	603	1076	248	760	1142	250	2671	838	400	1466	369	492	483	867	2202	350	322	734	508	887	536	454	170	289	1164	251	493	31	298	1005	452	934	212	590	199	358	436	588	1727	359	590	175
1474	193	373	419	573	851	246	779	711	563	182	967	258	559	978	892	935	-14	872	-22	1759	5097	691	747	1032	2489	-1872	736	1129	2038	1021	2254	1156	845	801	1381	30	2064	2179	1353	898	899	734	1510	1061	1743	811	1234	2679	1037
1475	-214	-357	-170	-226	-127	-187	-24	-20	-253	-3	-174	-266	-532	-195	-185	-203	-332	-277	-365	-204	100	-187	-362	-302	-330	-286	-219	-28	-531	-208	-346	-409	-293	-207	-450	-71	42	-226	8	-51	-449	-194	-209	-453	-161	-353	-162	-347	-140
1476	-3	-209	26	117	-108	-101	-2	-26	-97	-13	-132	-71	-170	-190	-90	189	-39	-75	-210	-271	-142	-94	-17	27	35	-101	-160	-22	-82	-151	-73	-197	-126	-11	-50	-2	-328	301	16	-100	87	66	51	-98	-99	13	-20	361	147
1477	-308	-165	-90	-446	-324	-276	-437	-1143	-441	-241	-488	-327	-484	-454	-63	-261	-499	-531	60	-895	-651	-160	-573	-316	-486	-1033	-533	-557	-1386	-808	-1177	-658	-489	-368	-285	-339	-1344	-41	-480	-323	-1199	-537	-1140	-474	-374	-444	-386	-1083	-501
1478	116	548	315	181	902	-307	4	972	794	108	40	207	-31	487	120	-16	126	158	334	158	485	1363	2000	2125	391	-362	1257	3081	-43	1048	-215	435	150	2455	344	-53	264	268	136	435	-91	83	-408	2808	-22	2665	3335	414	546
1479	339	98	452	306	285	192	182	473	249	90	189	96	74	412	248	213	178	170	496	317	535	410	221	116	758	1389	173	339	312	524	556	246	156	288	348	-11	169	-75	539	244	546	321	42	208	391	753	201	459	223
1480	2049	980	1038	2725	826	1232	887	322	3062	1744	3309	4386	266	1026	1685	2803	1322	2501	2753	528	1071	1744	1054	757	1384	31	1057	442	1277	725	320	2213	2138	1428	438	1395	359	343	1214	1308	183	1829	819	961	1032	1898	1592	767	2745
1481	322	98	53	142	311	218	77	117	620	95	99	124	50	886	395	109	157	242	493	148	387	283	154	63	565	559	130	135	191	182	441	417	210	77	46	175	508	318	189	288	338	126	293	22	155	714	140	235	-10
1482	185	419	133	252	146	102	130	30	291	61	115	183	245	445	182	20	103	415	298	465	464	191	162	150	210	489	16	224	126	87	698	21	388	83	-15	168	232	477	461	277	324	23	498	494	177	459	199	739	-247
1483	120	170	219	-28	775	71	108	311	89	48	154	178	146	527	146	41	135	557	161	317	245	41	257	33	202	816	137	222	405	-132	352	319	180	192	105	46	402	301	269	789	464	297	173	311	826	229	243	417	158
1484	267	154	181	644	254	130	359	459	425	-67	219	349	594	1303	345	221	414	57	646	828	580	291	526	154	1104	355	717	567	893	72	430	554	530	264	-82	247	1185	50	600	329	725	490	745	387	522	691	411	624	364
1485	-44	3	-106	-127	69	30	8	-73	-13	-65	-42	-13	93	-5	-3	3	14	-60	-39	-158	97	-8	-15	-77	61	31	-62	56	-98	-193	36	8	86	26	-3	-16	-116	310	-141	24	-82	2	-58	-1	20	5	82	-137	68
1486	-34	-137	11	136	-63	-110	37	-194	-22	-34	-56	-20	95	75	-4	33	63	-28	34	21	0	-34	-61	-19	5	238	-9	66	-82	132	5	-5	-66	-46	-82	83	486	-343	117	21	77	4	-29	125	-54	-18	-65	-33	82
1487	86	-25	84	106	419	24	153	-83	118	55	30	74	85	-66	51	7	75	77	-20	232	219	-44	53	73	-35	139	36	209	27	159	562	95	106	82	35	110	423	402	74	149	24	156	191	94	119	99	68	100	-6
1488	83	189	150	149	88	28	48	536	25	57	158	48	210	157	138	35	98	-66	136	398	278	45	124	81	106	222	130	199	372	106	273	80	231	204	35	2	254	-544	56	231	928	126	494	201	89	125	304	260	230
1489	-8	18	70	-91	-88	1	53	-167	-69	1	-35	15	10	-39	-13	-29	-6	-51	-22	-28	239	0	-84	25	27	12	45	5	49	15	204	-37	22	39	-23	-78	-254	435	32	-92	38	-27	65	-33	194	-75	1	5	-75
1490	1123	786	1528	856	254	514	814	982	836	452	320	1857	412	2121	1094	435	1262	297	369	1075	938	1530	471	128	1014	1350	497	442	509	-155	514	591	320	708	219	1412	116	737	1238	318	996	741	925	363	1350	1227	574	834	175
1491	124	150	108	-269	19	105	62	77	86	80	113	363	143	587	61	147	105	202	215	176	32	600	163	57	405	387	121	38	-175	239	63	150	55	125	15	-71	-201	58	5	78	53	160	97	44	110	298	95	-263	82
1492	104	164	212	-269	285	28	-11	563	81	87	-7	220	2	66	14	112	261	69	92	119	159	213	136	83	161	-88	379	176	158	-22	-120	25	144	29	93	25	95	0	101	117	-9	216	-162	3	48	1597	-19	-61	274
1493	47	-87	-11	-173	12	62	22	110	115	-66	6	133	13	198	142	146	127	25	149	193	65	-15	57	77	252	108	199	-12	-235	-49	-42	77	-112	51	-31	9	370	-184	-21	185	14	42	-22	-106	232	98	11	-78	-347
1494	32	110	15	-143	12	101	106	295	-22	22	101	156	87	91	125	84	138	205	148	-42	118	55	64	45	41	263	271	91	82	-174	241	178	-52	5	156	0	-158	92	93	27	256	216	67	28	196	163	113	299	-6
1495	-503	-641	-812	-848	-813	-346	-426	-1291	-486	-165	-281	-505	-620	-759	-595	-149	-642	-389	-584	-638	-888	-169	-797	-504	-395	-1636	-592	-411	-1731	-740	-1082	-1325	-1088	-455	-234	-321	-857	-494	-152	-263	-1663	-173	-1517	-895	-408	-997	-399	-1293	-302
1496	107	184	-2	-357	209	39	-11	97	46	-20	-20	90	-50	202	99	104	216	179	297	183	0	314	106	-39	411	187	62	71	5	-37	57	255	185	15	-46	-4	10	-75	104	138	-222	44	58	-16	-43	348	31	-36	144
1497	323	83	73	7	184	66	179	375	143	39	99	229	2	143	95	103	91	8	235	204	20	422	72	120	114	-193	45	97	21	26	-341	120	-8	206	-93	106	254	234	96	155	256	85	29	128	84	481	131	389	-75
1498	74	-43	119	-89	-260	55	206	184	68	17	15	49	-23	457	40	72	82	138	253	119	115	-70	107	156	128	15	222	173	252	334	120	132	41	222	-58	184	137	-33	208	114	77	2	284	184	119	119	82	240	75
1499	121	427	161	78	692	266	102	207	230	-25	181	67	239	327	91	21	265	153	302	204	148	210	131	-94	259	403	409	-53	624	193	478	234	210	174	31	4	264	1056	112	405	29	77	27	319	282	388	147	548	109
1500	264	1025	392	975	889	337	224	778	749	259	577	357	618	1145	416	315	527	748	769	708	1047	427	565	498	817	1160	681	689	1512	599	1466	860	526	397	461	358	730	704	667	563	933	460	1167	634	614	913	459	2234	329
1501	539	67	39	244	-57	14	-6	-46	58	-22	-10	121	-13	-53	6	-61	27	83	18	-31	-11	-1	0	-29	0	28	98	53	27	-140	-78	48	-12	130	82	-32	105	419	114	43	-111	-23	282	71	-91	54	1	-55	-164
1502	106	-45	102	185	120	100	-57	150	105	10	58	170	-90	359	61	83	136	83	59	331	115	142	25	96	161	66	58	135	93	140	-42	99	18	111	-70	122	95	108	138	114	130	134	110	187	0	357	171	207	30
1503	75	58	88	190	-972	195	332	265	-21	112	192	71	-21	244	367	32	265	343	113	384	1127	242	142	114	411	305	749	582	1030	72	809	156	25	53	-70	-4	582	125	640	239	536	231	907	49	487	123	155	498	-10
1504	61	-204	22	117	133	27	197	181	73	0	127	32	335	183	42	44	13	-46	-21	327	337	-59	104	203	-23	200	-19	20	471	-37	57	65	168	119	-39	-20	-296	410	152	204	237	169	54	-59	127	108	126	431	20
1505	114	-80	122	330	-254	-149	55	43	148	38	-2	92	55	408	78	-41	102	-196	-63	-119	-74	123	272	-114	189	-533	88	132	-87	-341	31	-53	-70	-27	78	-30	285	-243	-125	174	-77	-70	-361	47	307	286	-41	811	274
1506	26	-135	-53	71	-63	-56	-57	77	-43	17	-4	-18	-37	-69	8	-12	27	-40	32	-84	-11	-27	107	-98	-106	-73	-68	15	-164	-117	-252	2	-7	65	-70	-67	-264	326	-122	40	-164	77	83	62	59	74	-8	-162	-82
1507	-200	-789	-816	-652	-946	-420	-368	-1637	329	-180	-685	-306	-764	-222	407	-238	-645	54	-640	-666	734	-217	-629	-753	-169	-1347	-383	-774	-1140	-869	-1707	-275	-295	-473	-176	-691	-1280	-947	-640	-429	-1407	-205	-535	-518	-601	-573	-611	-1276	-474
1508	618	1178	1340	1263	1340	1181	1507	1922	701	549	1764	1525	1443	3367	1502	667	1769	1874	2313	2058	2676	1551	1391	828	2848	2825	3176	2555	2164	577	2096	1942	874	1207	735	1222	4308	3227	2620	1385	3240	1349	2273	1186	2577	1828	1216	3034	704
1509	-657	-134	-346	734	679	318	372	137	182	-52	92	-160	-290	-75	189	64	-557	895	206	345	737	-281	185	874	23	-47	-478	-227	422	520	373	331	261	106	-281	420	359	553	-29	236	241	143	-1158	228	-389	311	341	251	109
1510	164	93	-28	102	88	202	59	10	225	60	76	251	15	216	34	101	126	150	148	-24	165	520	26	-65	342	-254	176	102	208	117	-5	182	107	228	35	-71	-338	-234	168	-27	-101	109	13	162	170	151	-10	-131	109
1511	155	620	-22	250	597	169	124	258	664	174	58	323	146	308	357	58	234	398	430	419	461	217	321	233	740	444	468	201	707	672	1066	599	302	102	313	214	338	938	149	291	169	218	144	94	280	969	292	674	161
1512	-20	-23	-8	65	-165	23	48	-77	-1	-26	-41	51	77	-21	10	-23	82	40	-10	-52	148	2	0	81	21	31	-68	-35	-93	22	5	1	0	288	-39	-36	-42	259	-56	54	58	25	-56	57	41	9	119	100	103
1513	1682	-119	122	72	273	768	164	291	120	185	72	116	-77	298	143	72	202	184	60	236	1201	137	305	785	334	1334	186	436	-263	-94	126	111	59	1116	266	-41	-158	519	18	127	449	1808	-81	1259	119	275	538	221	137
1514	146	464	421	42	-165	310	284	60	-121	167	272	500	452	570	-69	107	361	46	544	1463	-233	914	-66	709	640	-244	0	222	317	801	788	-403	-31	-69	-266	448	-963	1785	-288	70	77	242	-31	-115	-273	176	332	425	137
1515	659	-13	224	222	1162	120	182	449	334	131	387	593	-18	1040	330	143	201	635	640	571	461	167	240	-53	872	937	360	263	98	-117	204	504	417	87	242	127	1005	721	-200	443	-1542	113	291	104	153	742	338	456	171
1516	105	-97	217	-78	127	198	193	301	90	8	112	76	191	516	215	27	151	138	31	927	301	51	84	211	141	-9	222	158	350	379	751	102	-187	347	39	55	264	-511	10	38	222	137	-257	55	99	87	46	391	-61
1517	75	152	-137	-102	-31	102	17	-144	42	-25	-15	71	7	-43	9	7	28	129	72	285	150	-18	60	128	106	298	-75	-56	49	-387	57	54	-107	23	-3	50	137	176	24	24	4	-70	-501	-27	56	86	-1	153	-171
1518	92	-48	261	24	76	101	82	355	53	19	125	298	-13	167	47	-4	24	176	115	359	224	31	43	98	-131	6430	98	-25	224	334	451	113	95	45	39	9	2000	-243	248	231	256	119	151	101	147	107	32	498	134
1519	277	655	401	132	-260	85	228	727	422	122	230	402	194	1356	432	249	677	629	496	581	414	323	464	118	929	810	772	485	542	-326	352	794	231	358	281	196	84	-234	365	-141	1165	179	512	164	487	548	367	576	1051
1520	112	-665	59	-235	-349	97	22	30	-156	-168	26	179	-242	154	-5	70	-129	-372	-602	451	216	72	-157	-33	-198	-219	-212	86	197	-789	-325	-710	-621	122	-207	2	-518	394	507	-239	-802	-53	56	-233	211	169	185	-151	-24
1521	2350	222	1624	1299	-3590	2042	2488	2985	1474	641	1290	1443	1603	3117	1109	1007	1133	2079	842	6536	4224	1237	1072	1858	1951	3547	2626	2867	6248	1909	3221	930	-42	1324	227	1950	836	1928	3090	1249	3458	1778	5833	1943	3538	1150	2323	2729	1343
1522	689	-43	685	312	597	772	563	650	518	179	336	747	378	1811	762	401	471	872	874	891	1400	643	861	365	2566	521	897	541	838	186	630	721	501	519	27	751	688	679	733	718	948	424	589	389	1063	1496	292	579	336
1523	827	3097	1504	1874	1226	2322	4501	2381	3748	562	4033	2330	3769	8078	5256	2438	3867	6704	6035	6726	2412	5279	5522	2343	12329	1878	3834	3391	5239	5175	3993	10050	3216	1689	3863	1294	4721	2506	3808	4095	3622	2016	5068	1809	5510	6552	1425	2449	4876
1524	559	-103	-417	-237	-203	28	914	137	-333	87	119	956	546	2895	1357	-133	1874	268	525	253	-177	776	-343	-787	1953	73	1201	-695	630	-1192	-1765	1274	816	453	199	-136	-1312	-1659	491	-1186	106	647	848	-785	164	658	-40	-1466	360
1525	12	65	0	82	-432	26	11	-214	83	4	57	23	114	-6	156	-61	133	314	-640	229	130	-325	175	53	37	-629	147	117	-87	212	867	218	134	3	93	0	645	16	-64	-149	91	-49	230	299	170	-129	83	151	264
1526	74	-87	59	-80	6	220	68	-36	-48	6	58	-68	0	152	12	64	0	-158	-31	412	293	108	21	126	-376	524	58	196	-43	-18	315	-97	-105	247	160	4	52	-58	112	81	232	21	76	204	200	-68	105	58	-75
1527	58	-155	-128	-119	-241	-129	84	-234	93	-110	-135	20	0	266	20	-30	0	92	-99	380	74	-45	46	-183	-159	-314	-94	-125	-624	-64	310	2	86	-126	-242	-67	582	-544	-197	-65	-101	-115	-291	-55	0	41	-8	-330	-127
1528	920	1496	1178	833	2255	1277	1518	1865	1201	279	1130	1203	1158	3530	1038	349	1443	2030	1641	2284	2104	3818	1414	1400	2410	2698	1948	1852	2570	1332	2238	975	787	915	755	896	2498	578	1347	1050	3114	803	2309	1374	1187	2300	1434	2127	879
1529	14	-1	55	-61	-76	92	71	-70	95	-10	28	-9	-15	95	59	0	71	129	63	260	195	37	111	92	-31	-57	-81	104	120	-98	267	-51	-25	15	35	-41	-254	217	10	106	270	-59	33	54	-29	-4	22	-83	-123
1530	123	722	552	1128	603	462	828	1036	628	251	429	556	1372	1305	705	212	698	924	821	867	831	1909	670	901	1219	1207	730	891	1041	372	756	1145	726	738	798	425	2043	729	298	835	711	947	1000	724	546	945	756	1497	549
1531	450	-160	-11	426	127	1618	350	322	30	52	129	53	452	332	-57	193	210	444	53	609	441	37	418	642	23	22	130	585	356	224	357	-528	-35	702	227	67	-190	-519	194	57	72	132	69	308	104	432	482	-450	233
1532	621	633	559	454	44	40	654	1177	282	230	593	914	759	1087	460	230	884	311	511	694	213	767	202	543	1069	1045	851	876	542	330	10	729	357	388	277	367	158	-285	429	54	1151	231	286	601	584	764	401	-25	271
1533	-264	-97	-394	-233	-495	-11	-290	-637	66	-17	-467	182	-199	9	72	-4	-112	144	168	7	-358	0	-282	-624	-57	-994	203	-375	-641	-759	-194	-226	-69	-189	-262	36	-878	-394	-437	-334	-1020	107	-614	-369	-192	-19	-368	-674	-498
1534	358	776	563	603	578	256	441	1180	628	131	969	763	1284	455	3478	326	3611	1972	3231	1064	2095	416	2638	3929	606	3172	776	2719	707	1936	1318	1482	278	1420	571	332	486	1551	515	723	619	3550	526	849	207	2651	7359	1321	955
1535	181	65	366	-1192	521	-214	133	593	985	-109	-666	141	-575	481	406	200	346	491	651	-631	-674	-97	441	-662	565	-969	379	610	-1551	-1363	-1129	-81	271	218	-309	-561	-179	645	34	617	-1460	152	-564	159	305	843	398	137	-1061
1536	46	6	26	-9	-50	66	-17	221	103	65	59	104	-122	33	86	32	123	34	170	222	124	58	-57	177	311	143	58	120	71	136	94	114	147	-27	50	-41	95	293	50	40	-120	197	65	-15	159	118	83	-92	44
1537	107	201	24	-24	298	189	68	275	145	-16	89	136	77	-19	82	13	110	225	192	303	59	129	104	148	74	203	314	-12	131	148	178	133	69	271	121	23	63	-159	2	62	178	344	302	140	22	255	58	97	-116
1538	-27	-23	22	-194	514	-63	-119	-177	-8	-104	-176	-178	-143	28	123	-15	-146	207	-142	-133	-35	20	-62	-193	-5	-715	-176	-265	-290	-497	-136	34	12	-5	-199	-177	338	536	-21	361	227	-201	-200	-181	-344	-168	-74	-139	-247
1539	335	6	-15	-114	565	78	-73	258	76	58	14	211	45	64	181	21	68	46	58	412	301	16	149	316	183	410	-3	38	0	159	152	158	35	1595	46	62	232	234	-2	-16	299	44	164	218	114	102	476	75	44
1540	324	268	210	207	6	314	175	707	398	67	208	283	245	751	236	223	191	363	124	856	150	391	245	377	342	619	301	339	422	429	646	714	258	302	277	159	-52	301	285	296	512	347	431	150	419	461	352	218	79
1541	736	214	352	63	285	387	392	882	619	119	742	880	823	1269	434	255	450	236	321	987	290	859	645	452	811	282	985	615	685	440	267	860	512	638	340	27	-63	142	934	397	-9	336	1070	223	721	800	580	781	99
1542	237	102	354	-91	629	263	182	509	321	172	362	284	482	463	223	123	292	343	289	846	589	264	254	312	256	886	255	360	559	778	951	301	427	264	93	302	1037	536	464	302	740	295	663	221	455	423	246	800	426
1543	1213	531	1672	461	-6	806	958	1811	462	267	996	1153	724	2438	681	461	729	329	187	1886	1121	2469	879	490	998	1716	1506	1827	1896	121	977	453	669	717	724	806	1132	796	1894	223	1567	1133	1810	699	932	1187	726	1226	395
1544	-20	-117	35	-136	-203	95	8	-10	-4	-15	-46	11	-47	-40	-48	41	-40	-86	-46	236	76	-11	-49	-11	-82	-92	-52	12	0	288	31	-43	43	30	31	-32	179	92	152	-57	72	-68	4	10	71	-4	1	106	41
1545	94	110	2	65	-203	33	57	-63	172	85	20	253	42	206	159	18	131	132	170	380	452	102	162	-55	226	654	94	-28	5	-3	225	-53	29	138	125	25	31	-217	106	-81	130	167	-164	94	3	136	64	369	178
1546	156	40	77	-102	413	155	250	87	241	0	145	419	202	496	204	0	340	283	358	676	378	26	206	223	299	781	229	155	679	148	535	853	425	367	66	309	158	201	328	217	1160	143	153	181	192	255	325	302	536
1547	683	1828	949	579	2789	627	697	1479	749	353	880	1092	887	1868	908	198	1530	1374	1656	2697	1483	1728	1022	793	1654	1414	1398	1479	2411	1006	2721	1624	1139	795	395	709	2837	1467	1473	1091	1620	1030	2081	831	1373	1639	1210	1996	347
1548	34	174	57	-29	146	24	35	-50	130	52	-18	41	93	458	35	21	315	83	132	285	-118	441	97	9	193	88	252	58	-32	117	157	155	539	50	-23	-23	-74	50	146	-10	188	119	286	104	99	146	-47	-333	-13
1549	304	110	536	259	120	104	213	640	351	103	251	160	468	634	326	170	360	176	479	609	269	251	312	150	498	1087	520	436	1068	208	425	257	445	262	371	115	275	528	173	291	812	21	774	501	432	330	323	607	130
1550	5670	12980	3616	5052	3494	4771	3955	2740	7835	5115	4487	10470	2954	10433	11992	4533	14552	4185	11103	3578	2276	12236	6172	3591	10186	5152	3667	3230	2559	4279	3709	19625	10678	2627	9472	4192	4171	2791	4101	7274	3197	8495	4668	3551	4911	9791	3547	1590	4842
1551	1290	1672	643	848	1150	1489	1471	254	2103	945	757	2642	-7	4834	1592	1100	1729	673	1733	391	1148	4727	337	547	1128	270	2514	1474	1501	-296	535	2192	439	678	696	1742	434	1618	1267	285	372	1178	765	198	440	2477	547	349	82
1552	195	40	-26	31	12	120	108	-127	167	43	58	161	34	118	65	58	144	2	255	-119	337	251	0	-73	336	-232	62	86	137	-79	141	55	-251	547	54	78	-116	-268	184	-48	-101	-29	101	22	65	435	61	-61	20
1553	494	98	168	155	698	-8	153	449	167	12	397	-137	-63	-57	-127	192	-210	-297	45	-49	272	-212	537	462	-112	-174	-428	181	235	588	-588	-144	95	274	320	101	-307	603	226	508	193	235	302	341	76	45	258	333	824
1554	-8	-155	-51	-100	-317	21	4	-60	-40	16	1	-65	-42	-172	-30	-3	-63	-92	-82	-200	97	-57	-32	-126	-106	-120	9	-56	49	-121	-57	-80	-87	-17	-46	-25	-31	142	45	-65	67	32	56	11	13	-87	-28	-83	-48
1555	203	238	221	201	368	236	410	258	43	73	348	717	287	608	297	270	199	349	585	743	669	450	359	361	837	807	956	1226	981	258	73	342	228	327	344	291	381	293	926	250	706	582	830	96	640	402	501	671	-48
1556	17	-119	-66	-28	-82	-28	-71	-124	-14	58	-109	25	-93	51	-13	-15	-31	5	68	-31	-2	21	-121	-73	-11	-85	29	-35	5	-45	-173	-141	-214	-9	-35	36	-169	-83	5	-40	-154	85	-18	-169	-22	-37	-119	-352	-106
1557	80	11	106	110	63	30	26	130	301	-5	68	75	141	456	58	40	169	179	242	28	71	118	101	-150	244	133	140	35	169	-79	199	63	29	39	105	90	349	-75	50	46	-38	-25	90	40	31	105	-44	47	-61
1558	14	67	-188	-381	-38	2	-84	-288	-44	-39	-148	-44	-130	201	-44	-72	-119	395	-40	-359	171	79	-189	-120	72	-607	134	-252	-98	-326	-5	-171	-82	41	19	-60	973	-326	-184	-46	-788	-59	-406	-223	-63	37	-97	-313	17
1559	-10	-155	-4	-52	25	-50	15	63	-86	55	19	-34	21	-99	-27	24	-55	-60	-80	-52	186	-51	-53	189	-161	73	49	-122	43	91	120	-74	-76	41	27	48	582	-528	-29	40	77	-96	63	-15	-11	-52	77	-78	54
1560	16	-58	-11	-16	-63	2	110	33	49	75	73	118	-7	275	111	15	21	121	-1	-102	56	41	43	75	169	-130	124	7	175	-22	-52	6	-15	57	23	32	0	-83	26	2	9	152	20	-52	65	73	-46	282	-82
1561	1209	564	474	-44	482	600	566	1264	1077	181	678	1281	631	2146	1100	1003	1082	2778	522	1128	1284	1097	907	1688	2109	518	870	771	597	634	1339	1359	821	1148	356	513	804	712	1062	751	730	614	273	677	754	1898	1404	803	374
1562	880	1848	1823	850	2039	1149	1336	2110	1525	824	900	1401	1531	4106	1169	607	2033	1747	1537	2848	2492	2191	1045	1143	2440	3197	1787	1528	2482	1067	2238	1808	813	802	1413	979	5113	3412	2076	1327	2578	955	2463	1440	1783	1737	1358	2852	958
1563	-2	164	4	9	-177	30	19	43	117	22	30	62	55	84	47	1	42	115	146	-155	97	34	67	77	78	54	13	51	-60	-72	173	93	-95	-31	66	-4	412	-25	-29	10	4	-14	58	6	-1	88	-77	-36	134
1564	769	343	135	100	228	217	281	211	466	97	244	400	82	2700	481	107	957	190	399	433	503	1002	409	104	584	629	618	229	279	60	677	1414	547	258	-454	152	751	603	608	125	198	372	200	162	333	862	141	445	75
1565	-30	-222	-37	-353	-362	-11	-31	-147	-155	0	-79	-10	-234	-43	-59	6	-98	28	-35	-303	-79	-72	44	92	51	-390	-153	5	-158	110	-267	-111	-241	79	-50	-108	10	385	98	-198	-164	-81	-189	-72	-134	-69	34	-380	44
1566	58	-117	-51	-291	-425	134	88	43	46	-19	88	27	-31	-33	164	109	112	20	134	63	210	161	-74	-146	-29	181	75	-166	224	37	78	218	-49	149	109	60	423	-343	288	84	19	36	187	-297	177	105	79	-72	120
1567	-5	-274	-359	102	-908	-8	-95	-261	-139	-80	-42	48	-191	-106	-108	-30	-90	-135	-93	-222	20	55	-162	39	72	-400	-196	-155	-383	-64	-241	-385	-63	14	-133	36	-688	-997	-160	-323	-217	-107	-250	-108	-183	-117	-201	-408	-175
1568	391	-87	812	1029	63	188	88	1335	165	783	192	1762	2666	1659	79	84	1099	98	-12	84	124	1276	195	419	108	349	631	242	443	26	-141	77	154	270	156	1201	179	377	178	225	391	-17	-56	181	841	344	226	313	182
1569	52	35	117	183	108	123	37	-6	48	1	64	88	210	134	42	27	73	89	93	0	130	74	125	211	118	181	94	99	290	212	126	74	150	7	93	115	-285	318	85	157	67	-47	33	20	71	98	16	207	161
1570	61	102	33	355	349	194	8	214	46	41	151	346	-261	399	176	178	175	-141	-94	-592	636	174	248	-251	271	804	180	268	-16	140	688	279	496	330	23	-184	-74	125	467	231	149	182	-79	507	-20	117	382	-25	381
1571	63	-177	39	-123	108	46	-51	77	143	30	1	195	47	370	90	90	189	-89	306	-17	32	12	56	-1	403	127	196	-12	93	-155	26	121	174	146	-54	78	-10	511	5	228	125	-77	-90	1	78	222	110	13	-68
1572	900	1671	685	700	1823	458	406	704	294	142	716	1343	338	2560	916	536	1657	1398	1005	1121	523	2747	669	887	2893	1776	1637	590	624	474	1387	1405	662	1485	320	339	2043	1836	725	1240	1325	867	769	609	1444	2652	1120	1268	292
1573	467	491	789	1007	889	404	368	697	308	223	325	846	937	2448	578	375	639	462	765	560	618	944	544	251	2593	928	838	424	981	489	782	1043	279	511	367	517	1238	570	747	693	764	454	406	360	1174	758	344	531	250
1574	125	93	-17	155	108	27	53	-30	14	16	-40	142	135	355	68	66	116	92	105	70	142	177	152	87	281	-79	114	38	443	-106	157	40	170	114	23	131	486	234	8	114	-19	-34	83	64	207	214	95	16	-164
1575	6	291	122	123	718	-47	-93	-53	283	6	-93	349	82	531	340	3	221	592	353	88	-62	183	79	-92	581	171	232	104	54	189	320	179	87	42	90	332	-465	-150	125	-127	-237	-83	-92	132	161	373	-62	27	-85
1576	440	43	709	512	686	326	182	758	283	138	483	529	567	1120	269	278	549	352	377	641	592	667	445	492	598	533	500	444	904	580	835	430	469	360	289	201	762	846	507	54	1160	383	810	719	884	662	413	195	450
1577	22	31	28	67	235	2	-55	-16	-8	3	-82	-1	-29	13	12	-7	-24	5	50	-179	20	32	66	17	76	-60	42	74	219	56	68	58	208	74	78	32	222	58	29	-51	-48	53	31	11	16	-2	-25	123	24
1578	45	306	102	-682	546	160	64	-1237	-94	80	-224	79	-226	88	-76	147	20	199	168	-292	195	252	-16	81	137	2367	474	-51	-761	-280	425	238	183	86	-125	108	1079	687	-138	84	-778	222	-884	-277	86	169	64	75	-807
1579	152	129	244	24	629	168	35	-731	243	17	20	137	47	602	158	30	129	199	355	-380	183	80	-43	249	224	514	199	10	630	-30	-173	450	442	287	101	189	582	435	101	234	203	79	203	30	101	207	217	873	103
1580	401	516	654	557	559	245	308	607	189	227	329	516	498	958	343	240	288	577	306	356	633	471	451	785	600	746	612	467	800	831	704	1066	323	475	148	312	455	1274	394	288	870	430	1289	423	492	585	465	400	546
1581	-113	-139	-26	-379	-266	-137	-115	-53	-54	-132	-70	-13	103	-132	-26	6	-57	-153	-41	-246	-136	-107	-43	-108	-141	-247	-16	-125	-246	-110	-31	-35	-102	19	-270	30	-95	134	-205	46	-275	25	-298	-269	0	-108	20	-366	-127
1582	-66	-155	48	-5	-292	-97	-6	-258	-304	-53	-97	-174	-58	-84	-184	-21	-126	-54	-87	-102	-222	-53	-49	-181	-155	-419	-150	-153	-191	-15	-31	-54	-198	-94	-187	60	-285	-285	48	-155	-130	10	-198	-76	0	41	-108	-450	20
1583	75	0	133	-289	19	-34	-91	-137	-115	45	64	37	-130	278	67	38	-27	202	-55	-105	177	85	197	-193	13	225	-78	324	120	-49	-120	-53	18	170	-31	157	-243	-670	213	-163	33	-12	-15	40	159	130	-195	433	-20
1584	275	559	272	353	63	294	248	405	259	250	234	763	210	1540	465	292	684	109	499	447	352	943	377	114	661	670	582	500	630	-53	751	556	282	303	183	90	539	402	648	117	314	317	528	189	496	736	120	159	116
1585	155	18	195	-85	228	97	48	161	155	89	44	272	215	972	214	186	200	415	587	239	361	15	181	243	709	273	366	102	219	136	320	805	177	270	-35	171	307	1081	448	247	169	220	447	104	181	388	95	366	230
1586	3	67	24	-18	139	33	71	-13	69	-2	-3	106	133	110	45	40	107	141	125	-102	2	80	0	-126	35	6	124	25	-49	-68	241	38	18	14	-54	73	42	360	-16	130	48	-68	-88	60	37	105	-40	282	130
1587	76	67	6	-108	-139	253	108	40	-60	27	-28	-2	-87	325	209	18	17	-51	208	659	340	1240	120	9	133	-38	281	447	-5	41	819	-5	-78	-50	43	50	169	192	832	-16	280	-4	-155	-110	91	56	-85	-193	-17
1588	136	201	126	-74	44	-208	-237	-26	389	50	77	75	-82	253	48	-29	26	75	513	105	-65	-33	-252	-229	230	-216	-451	-298	487	-413	-105	122	-19	83	70	-73	444	343	157	168	343	130	-135	-11	39	11	-62	-629	-3
1589	-36	-524	4	-383	19	-150	-146	-228	-125	-286	-284	-161	-820	-234	18	-41	-72	-138	-8	-980	-606	-152	-229	-207	-177	-845	-114	-112	-548	-592	-1234	-735	-65	83	19	-323	-243	-209	301	-89	140	-287	-313	-370	-226	37	-138	-545	-6
1590	67	363	148	-254	171	97	128	295	89	-44	62	112	162	142	96	126	129	285	-80	327	-56	-8	106	179	433	-143	-65	158	153	117	520	194	14	256	152	108	465	234	304	198	386	68	155	143	123	-1	110	-400	140
1591	113	-15	99	-259	298	69	48	-231	-16	15	117	-43	-149	-162	21	101	49	-193	10	105	145	8	202	-53	133	-3	6	158	-246	197	189	-15	-131	-39	274	-85	52	134	184	182	-498	74	-74	40	131	181	-20	-201	-226
1592	237	588	84	-155	146	158	-2	-80	208	31	87	308	122	390	169	140	219	335	432	38	-50	302	353	13	494	441	314	45	-76	-11	346	307	330	42	274	131	-116	528	85	176	43	8	-135	108	179	490	164	344	-288
1593	217	-1034	459	-153	-1029	-1	46	-788	-1088	-335	-447	-105	-258	-122	-335	43	-352	-543	-1126	387	639	-271	-294	100	-649	2075	-402	574	-312	-243	-851	-708	-691	-189	-180	108	-1725	-2875	629	-1034	-58	432	-178	-795	-264	-456	-67	-470	-388
1594	159	-243	226	-293	489	-50	179	-73	-111	-122	39	-85	-263	-239	291	109	-67	259	-135	14	325	59	-103	464	646	-47	409	730	-131	273	199	-419	-39	272	-152	261	434	452	117	133	-149	-32	88	118	155	-155	420	545	-68
1595	-230	-792	-235	-254	419	-211	-293	-382	-728	-43	-140	-251	-436	-862	-320	-193	-251	-791	-644	-313	-340	-337	-238	-185	-1016	-664	-389	-166	-246	-337	-520	-510	-454	43	-281	-302	-931	-536	-338	-242	-904	-400	-200	133	-234	-559	-32	-265	-546
1596	16	38	46	52	57	110	-31	-6	-47	-11	-25	4	-13	12	150	147	15	8	20	144	476	-23	151	29	167	63	29	189	-5	136	-42	109	65	33	23	20	-423	385	-18	106	120	100	36	-30	76	169	68	-218	127
1597	-149	26	-195	-192	171	-181	-326	-369	154	-90	-182	-110	15	33	-158	-227	134	231	26	-370	-352	111	-29	-75	-96	-228	-104	-347	-219	-117	-152	-65	173	-216	-250	6	317	-75	-160	19	-1020	-179	397	-150	67	290	-337	-257	-439
1598	421	18	217	35	444	173	-77	-6	648	200	200	513	290	624	237	144	163	363	161	155	216	101	76	464	114	518	324	102	76	163	-26	457	80	161	191	251	31	41	104	133	217	-12	-60	184	103	265	386	103	24
1599	29	112	44	-33	19	-7	-24	3	58	-59	53	53	-119	69	98	75	18	124	170	24	-50	50	209	13	608	120	32	20	-120	-208	78	215	156	22	35	16	-296	251	53	244	96	-12	-212	33	48	283	22	-81	-99
1600	113	88	-99	104	432	92	2	-16	-50	-31	-35	210	277	485	9	75	88	245	-25	412	-53	283	67	-122	106	139	258	178	38	-72	42	-33	-89	208	70	122	31	352	272	46	145	-23	-29	35	211	33	-34	305	-13
1601	-113	-382	-319	-239	-349	-237	-190	-499	-381	-52	-346	-206	-516	-560	-275	-73	-427	-112	-365	-662	-479	-500	-69	-239	-149	-1198	-265	-273	-471	-615	-1098	-593	-246	-206	-7	-120	-381	-234	-317	-318	-759	49	-264	-424	-146	-333	-404	-842	154
1602	208	650	-4	59	-76	-14	31	-218	146	37	42	242	45	534	258	-13	103	496	451	102	35	280	133	90	628	22	556	268	109	-337	120	206	105	114	101	106	-285	176	165	-87	-159	74	-115	-135	247	519	26	-125	-75
1603	-230	-348	-987	-543	-660	-365	-277	-982	-424	-182	-531	-376	-767	-617	-478	-210	-1018	-465	-782	-655	-686	-129	-660	-476	-608	-1033	-307	-577	-992	-1021	-1355	-949	-489	-252	-274	-346	-793	-989	-282	-571	-2026	-336	-1031	-604	-194	-591	-382	-1377	-432
1604	16	333	44	50	235	-7	77	110	177	2	160	156	71	504	310	60	248	277	255	204	130	342	83	61	305	171	458	140	328	178	220	274	167	151	15	0	201	-125	106	29	82	-12	-115	6	114	994	-34	-282	41
1605	207	529	115	-42	387	282	317	-134	467	239	108	395	191	1661	466	238	420	271	488	317	334	1017	107	272	368	403	419	339	153	60	315	1039	292	323	90	217	878	16	459	541	275	143	322	308	282	732	120	433	109
1606	-27	-45	-22	-5	108	-39	11	-30	27	-4	-1	-4	-69	66	-5	0	9	-153	5	59	-91	20	-17	-130	15	-139	-88	-35	5	98	-52	63	-8	-38	-101	-9	21	-159	-90	43	130	-77	79	20	-5	-5	-14	-125	-206
1607	93	-40	-70	-108	133	23	8	57	181	-85	-13	-114	-39	62	53	-15	-131	-300	-118	-66	281	183	99	128	27	-171	-140	150	-43	-356	493	-177	-295	-14	-383	-6	-624	402	96	288	222	145	-300	-64	189	486	79	-187	85
1608	-52	286	-39	7	-355	-81	224	211	129	-93	194	62	90	990	131	140	332	-259	145	306	-133	943	349	310	151	314	481	186	416	307	-210	-25	190	95	125	173	508	-721	-192	296	309	184	460	145	-153	339	-23	212	223
1609	151	132	4	-59	146	176	88	288	301	58	55	190	133	600	83	55	198	283	258	17	174	138	98	11	429	219	356	178	-10	-98	183	275	237	98	27	115	-84	125	40	97	149	100	121	66	65	544	80	237	85
1610	17	-75	104	87	-247	-27	-15	80	259	66	151	138	-93	110	-106	9	143	-83	-51	-285	-94	691	174	-314	23	114	294	15	5	-129	-47	120	-53	-74	43	-143	42	75	-189	21	-232	-102	67	10	-88	918	44	-523	-158
1611	90	5	-139	-95	285	37	71	57	55	26	-75	76	98	58	-18	7	45	193	97	-35	272	17	35	37	147	-44	78	22	-16	322	-215	49	-65	-69	-3	145	-116	293	117	54	-222	57	106	-37	239	192	34	81	-24
1612	68	60	-11	-72	152	30	66	352	61	37	91	156	154	114	102	80	80	121	141	112	115	60	157	27	-51	146	235	68	323	167	394	114	105	50	74	76	275	377	240	-73	120	214	295	118	176	141	88	352	158
1613	203	358	-11	239	-2109	-47	-8	-295	62	45	268	-202	263	231	104	58	-99	-2	192	715	645	68	25	322	663	-559	-3	28	1266	159	1460	170	193	307	-156	277	-1280	-712	595	-351	-135	179	814	455	33	76	317	1422	202
1614	539	360	113	244	-158	263	355	271	325	102	221	390	130	311	296	146	175	121	427	504	470	170	230	282	328	718	317	516	619	1021	856	511	339	323	144	506	497	754	232	-24	1039	287	-632	314	192	618	238	708	274
1615	576	1386	157	13	470	662	-366	503	2237	179	3479	822	-58	953	805	295	989	2065	530	387	310	1240	1648	-73	2073	190	1060	889	175	254	982	229	1013	170	227	117	846	1182	517	840	715	265	311	384	550	2523	-16	-1203	288
1616	-13	-15	-86	291	0	97	86	73	-57	-1	77	41	10	11	60	-23	103	129	44	-133	29	-68	-62	81	216	-139	-49	-81	38	-56	10	28	99	-73	-227	55	-508	-58	26	133	270	32	69	221	-9	106	-80	-61	54
1617	418	670	66	614	934	494	308	674	210	137	586	446	588	966	403	426	378	904	596	1114	1545	183	312	717	894	1128	1067	643	1013	972	1292	649	354	352	277	485	1799	1349	931	734	836	267	1239	426	1245	647	761	767	635
1618	32	-122	53	207	38	13	-130	53	6	-3	46	6	23	-115	-34	55	-49	-25	-99	45	-165	-57	-2	164	92	-384	-101	107	-43	-140	-294	-183	102	11	-58	92	-232	394	-45	35	-9	-143	-119	-3	114	-27	-32	-268	202
1619	469	576	113	170	285	198	215	338	785	34	139	600	109	1291	579	249	633	407	792	271	444	1725	229	102	1118	553	920	861	263	178	772	809	377	315	-3	145	1503	201	378	517	174	276	137	235	470	811	164	551	219
1620	76	645	368	192	413	7	202	-77	362	66	44	223	338	619	226	118	189	294	335	313	364	231	381	239	405	642	327	281	-180	387	966	546	703	192	-164	171	-95	58	128	160	9	-4	367	501	265	323	71	778	61
1621	235	489	394	82	533	453	230	218	406	196	256	518	258	1169	262	240	346	187	440	165	287	1198	331	183	888	575	383	212	164	250	278	602	262	332	43	191	52	461	253	419	304	212	-40	220	243	789	220	151	154
1622	190	613	275	42	451	249	344	369	301	102	252	247	114	362	203	103	42	332	436	363	233	190	320	348	330	1090	592	362	855	478	746	343	140	262	137	138	-137	167	330	0	652	192	483	253	440	165	440	912	164
1623	-78	427	-77	-543	-260	69	37	281	208	-66	8	-76	-247	169	100	16	17	101	75	74	133	53	179	-124	238	-435	-65	-104	16	-121	-94	373	234	-2	-58	43	-169	-234	-189	43	-106	-14	164	-69	31	222	182	-61	-10
1624	142	10	84	-44	368	101	306	197	18	67	155	95	74	66	45	110	86	219	113	193	148	109	107	49	66	190	114	125	641	330	341	164	313	30	246	194	1026	729	40	291	207	280	334	30	99	65	225	478	34
1625	637	1220	346	213	495	407	443	395	687	494	537	1589	482	3239	964	492	1143	644	1294	313	648	2497	464	114	2270	559	1240	508	679	584	656	1206	390	318	508	362	1545	1081	739	925	503	580	763	369	857	1477	353	1027	216
1626	148	-206	-55	-459	120	0	-117	-50	-131	-94	-101	66	10	-157	-53	0	-47	132	-155	-306	-50	-115	-15	81	-53	-143	39	12	142	-98	21	-227	-66	-5	15	39	518	-50	-200	76	-227	-280	-20	-99	7	177	-104	-445	-209
1627	132	182	-84	-211	57	2	-15	40	8	32	-173	-2	-135	408	105	46	226	-17	144	-236	-100	171	-136	-114	350	12	180	15	98	-132	-220	134	153	81	-27	-122	-370	159	-122	-117	116	-44	29	-155	101	239	-59	-156	-137
1628	122	348	110	-310	635	13	62	-16	407	13	72	176	31	584	300	153	84	181	77	313	325	226	291	-13	577	-101	189	104	-186	140	215	95	283	-86	195	312	-105	653	141	274	599	154	-112	81	-101	543	119	344	164
1629	-1	169	257	-22	260	-27	44	70	28	-19	5	14	63	86	21	-20	49	72	12	-105	5	2	35	69	35	-60	29	68	10	26	183	73	207	-87	105	60	190	293	61	92	72	-19	117	-22	-9	20	-17	-2	44
1630	800	517	980	310	603	1068	923	473	21	349	112	786	-53	2329	631	636	1132	722	184	1145	2072	486	888	1823	1496	3162	884	651	811	132	1082	761	535	760	379	325	688	1400	781	408	2844	1212	331	1400	846	511	834	1332	-6
1631	35	-117	-73	142	-228	-23	-37	177	-163	-8	-67	-76	-279	-388	-100	-18	-137	-80	-1	-546	-11	-148	-46	-19	33	-136	-189	-250	5	53	231	-283	-259	-35	-23	-13	-677	-159	109	114	-270	107	-142	-52	125	-89	-2	-137	-243
1632	525	405	128	37	781	587	24	627	381	46	174	328	-15	138	456	100	209	95	574	35	840	309	176	142	212	228	301	465	219	288	304	450	86	327	207	184	105	670	298	130	275	173	255	13	14	863	329	335	37
1633	44	-23	31	-140	-152	1	-37	107	-62	-33	21	-102	-61	-330	-13	16	-104	-109	-44	116	-65	-60	28	-73	-55	117	-45	43	54	224	5	141	-219	-34	-58	117	10	67	96	-171	-130	-10	108	-81	26	-28	126	-72	58
1634	594	647	1202	893	7765	1059	881	3468	644	67	521	416	1377	2465	713	755	655	1458	985	1766	3309	1155	1013	1835	1949	4294	2688	1975	3611	1306	1870	754	442	903	935	1181	3345	3420	3554	3366	2268	1193	2067	765	3057	1308	616	1928	1591
1635	51	-26	79	39	-76	40	-13	77	24	32	12	117	-34	187	12	-12	115	51	-16	-91	82	103	25	55	27	158	29	38	109	-79	-215	-47	-29	78	-70	76	201	125	106	-68	29	-149	-79	16	-24	66	-28	-131	68
1636	154	75	248	272	158	152	117	577	67	68	321	156	290	145	160	56	107	86	69	430	396	116	308	282	147	346	114	-166	745	155	215	218	156	195	195	238	116	125	357	198	328	167	379	264	110	45	429	414	336
1637	130	201	110	-127	-69	105	-2	23	125	-43	-46	136	10	328	97	64	277	60	7	-109	142	77	-83	-43	120	25	49	-117	87	106	131	268	70	102	-90	30	84	-243	256	141	-33	34	-128	69	108	178	-114	190	-6
1638	2031	459	335	328	152	76	366	389	336	245	373	1915	442	726	530	118	361	465	637	260	1130	335	568	591	1124	594	1683	4413	652	121	457	1040	813	405	137	164	-624	913	427	46	-4	85	282	262	584	704	913	1369	182
1639	32	1	17	127	-31	-11	28	87	56	17	15	72	-7	147	26	63	47	106	7	-21	26	4	23	-96	112	120	45	51	-16	0	-215	72	87	155	43	-6	285	226	74	10	-43	-64	90	93	44	57	-1	53	-123
1640	117	427	257	31	216	200	193	174	317	72	154	239	151	702	346	110	478	86	208	102	162	718	72	146	177	-57	399	283	21	-68	-10	303	170	191	430	71	-95	217	333	76	198	81	6	42	91	466	147	0	24
1641	1029	722	776	1076	1283	477	497	590	1051	223	1014	1059	237	767	883	435	718	1478	884	267	586	1855	577	363	663	152	681	902	476	489	52	930	310	738	602	247	84	528	608	438	532	407	228	1171	449	927	794	873	268
1642	985	667	1845	194	139	361	450	493	-26	726	-236	1587	-141	1735	447	384	1847	-202	-706	-666	-361	1549	-5	-118	833	2326	252	516	-1370	-1154	-1681	308	-197	2732	144	667	-550	955	1192	165	-38	904	-661	1423	571	1332	1498	-103	-1209
1643	194	680	494	407	425	323	304	831	1736	1	683	323	325	483	777	172	374	1580	658	1501	2403	299	456	620	640	654	681	173	619	1135	1245	1596	753	155	857	385	1079	687	741	1085	957	372	882	392	1095	1524	331	1615	1051
1644	128	241	248	306	-12	76	226	268	289	97	160	243	202	218	216	13	311	401	349	112	266	194	282	100	86	406	232	265	438	83	425	317	283	254	54	224	317	293	328	92	178	-55	395	391	140	742	125	576	-30
1645	9	93	19	108	12	37	19	-43	5	48	23	38	-2	39	9	12	43	54	83	-95	115	17	-39	-5	15	38	42	22	-54	-113	-15	37	45	17	148	-16	-148	25	77	-111	-111	21	117	62	52	46	56	86	34
1646	-74	-83	-84	143	-610	-101	-44	-322	-362	-73	46	-66	167	81	-135	-75	-69	-187	-175	116	159	-69	-117	-51	78	-270	85	-120	-202	79	78	20	-411	-1	46	94	-307	-25	61	-195	-67	70	-431	-20	22	41	-74	-103	-312
1647	-16	23	-26	190	108	-1	73	-3	-183	-53	25	22	2	-378	-34	7	-50	92	-3	-193	2	-119	-3	-29	-15	-12	-45	-22	-169	-11	168	-119	-180	-83	31	60	84	368	106	57	183	-17	90	-98	44	-96	-34	-86	-3
1648	220	970	612	695	629	555	566	503	383	210	169	1145	604	2640	525	246	538	346	563	736	624	1545	588	25	1792	127	261	91	739	-561	593	1232	59	15	367	92	359	1919	512	840	556	419	808	162	756	451	62	-25	213
1649	203	514	574	229	235	301	270	419	396	222	116	901	458	2614	610	230	462	580	1005	109	263	1627	197	120	1739	727	595	357	241	121	441	786	306	310	317	337	688	368	512	323	488	278	97	176	623	1177	125	391	130
1650	64	-424	37	125	-374	-129	-290	-452	-344	-93	-400	34	-444	-776	-197	-209	-249	-150	-154	-525	-62	-251	-291	-29	72	-870	-389	-155	-405	-550	-809	-596	-499	-143	-117	-312	-698	-603	-117	-625	-686	-98	-553	-123	-217	-59	-146	-445	147
1651	42	85	19	181	590	10	77	-124	121	36	-21	249	95	99	56	16	88	167	363	-130	88	37	72	7	254	-289	235	-53	-257	-15	-304	179	116	17	-3	32	-10	-142	21	-76	135	-96	-15	-64	-9	140	-43	-134	24
1652	203	635	-62	502	114	39	-15	-150	406	43	-23	205	34	1021	421	213	322	-89	447	257	121	1056	-35	-7	502	162	104	0	-219	-30	-99	269	317	-46	50	464	-158	16	245	24	-87	359	338	-47	-29	787	153	397	298
1653	-75	-97	-102	-570	-31	-133	11	-130	-74	-22	-66	-71	-149	28	5	-20	-76	11	-192	-102	76	9	-48	-55	9	-114	-85	79	126	83	-225	-53	73	-224	101	-263	-709	-33	-10	-95	-33	-85	-257	42	31	-128	-82	-128	-340
1654	193	507	470	788	463	356	341	1090	307	93	701	208	1020	607	650	412	450	372	406	500	606	141	587	844	549	823	389	702	2685	1465	856	442	858	278	457	570	698	377	378	125	1896	362	1591	814	487	352	317	1772	360
1655	-34	103	-93	-24	-260	18	-66	-107	-136	-38	-5	-84	-119	-363	41	-3	10	95	148	-271	115	-50	-97	3	66	-289	137	-33	-169	-113	-241	-145	-102	31	-43	-138	-84	-167	-128	38	-140	-77	-153	23	-11	-141	-37	-13	-199
1656	-87	-227	-124	-652	-279	-75	102	-231	-69	-58	-182	40	-34	-85	-153	60	-72	63	-274	31	38	37	-55	-45	-76	-123	-6	-22	-158	-125	-99	-118	-83	137	-371	67	-359	-159	58	-38	-594	-25	-173	-103	-110	12	-92	-495	-130
1657	-245	-514	-423	-431	-718	39	106	-53	-419	-24	-13	-195	7	307	-76	33	-101	-75	-498	-31	257	-246	-15	63	-37	-705	-130	20	-175	-322	-68	74	-112	-114	-97	11	-211	-528	146	-228	-309	-83	-273	-242	54	-422	-70	-251	-226
1658	-246	-730	-48	-674	-8159	-1296	-941	-1855	-559	-647	-804	-510	-1899	-99	-391	-644	92	-1516	-1334	-3032	-2131	-115	-809	-1052	-1034	-2456	-569	-1985	-2724	-3728	-4960	-1955	-642	-821	-414	-492	-2498	-2925	-1067	-1096	-1910	-700	-1575	-927	-571	-395	-1549	-1755	-2488
1659	114	457	88	364	133	111	8	254	170	22	118	195	170	357	199	58	204	202	199	38	411	223	341	102	216	521	225	81	438	148	68	289	166	234	86	113	52	-142	128	92	145	64	88	49	168	384	74	543	30
1660	-278	655	-421	-1033	-1404	194	71	13	-478	-236	-124	108	-535	2996	725	241	168	459	-255	468	1666	365	369	-168	951	-731	1204	232	865	-721	-1818	-189	-17	94	-618	-9	-105	2095	1059	-519	1441	-2	-293	-511	-80	860	-864	-912	-762
1661	438	2039	133	91	603	395	250	466	2626	32	1017	307	157	1039	1306	683	332	1042	2557	42	1329	401	794	529	2625	715	520	347	476	1268	593	5496	1380	1092	1205	57	381	1131	328	938	754	74	214	1159	378	2227	925	937	1415
1662	43	83	95	35	-158	-10	-35	-218	-12	23	-19	101	101	14	102	-9	114	5	-40	-109	53	58	-33	-19	228	63	19	-45	-197	53	-84	68	70	31	-31	-69	254	-134	48	2	-101	34	126	11	46	117	25	-134	96
1663	47	105	-51	-100	57	33	4	-6	-8	48	30	39	82	135	83	38	68	115	217	-327	485	56	112	39	474	60	176	63	71	79	157	31	-146	41	-7	-30	529	-75	141	95	261	-32	139	35	162	69	86	291	65
1664	144	603	452	465	19	443	264	748	265	111	422	329	487	284	227	247	514	439	458	1004	612	0	526	838	831	858	379	247	1172	998	1166	603	239	376	-74	443	582	1140	312	318	681	257	629	614	502	428	616	1139	326
1665	75	-8	-323	-685	419	28	28	-617	-189	-275	-304	-125	-287	520	-56	-56	-205	335	-98	-289	136	-120	-58	-130	-13	69	72	125	-257	-155	-89	-67	-252	220	-105	-78	-539	-58	168	280	488	-224	-225	-338	-50	-201	-137	-335	-408
1666	46	75	84	190	209	42	37	67	28	33	-58	30	-18	9	42	81	30	121	78	-81	207	39	51	79	88	85	52	63	202	-3	147	100	46	37	-7	-67	317	570	242	117	-183	-14	124	40	63	11	216	173	137
1667	-36	-222	-68	-254	-196	-15	-93	-181	-173	-27	-107	-80	-143	-231	-22	-24	-95	-60	-199	-137	-142	-137	-96	51	-382	-162	-104	-127	-487	-250	-126	-268	-222	2	-27	-254	-465	-217	-117	-152	-29	-184	-295	-181	-76	-142	-91	-207	-219
1668	-185	-452	-656	-1114	-4676	-204	-532	-1509	-664	-242	-582	-392	-844	-396	-426	-253	-162	499	-1141	-1145	-491	-276	-409	-917	-110	-1538	-497	-235	-1090	-1883	-2122	-583	-614	-324	-700	-136	-1778	-2523	-509	-3045	-1175	-171	-1074	-545	-575	-725	-729	-2105	-457
1669	97	268	126	637	463	13	0	191	230	90	73	211	253	557	458	44	286	381	364	-10	145	273	259	-57	259	136	147	408	504	-227	362	496	242	278	-43	9	74	251	197	176	541	212	243	247	69	151	126	680	182
1670	51	249	75	211	457	92	39	110	212	59	131	144	47	402	198	21	125	115	30	123	485	28	225	39	228	289	235	158	235	167	352	114	290	85	-90	117	190	243	154	122	237	124	370	182	110	545	198	643	51
1671	-8	-60	-19	-63	-38	-82	-79	-6	-68	-32	-30	-15	-82	-125	-22	10	-31	-11	-6	28	-85	-52	24	63	-84	-69	3	-58	-32	-68	-246	-46	-56	55	27	20	-95	-16	-8	-81	-222	-92	-11	-28	-43	-67	-25	-75	-37
1672	189	-113	73	-128	50	556	93	164	56	-43	-91	226	223	884	104	163	180	141	135	102	293	-104	198	-49	974	60	180	99	306	129	-21	53	-32	307	-101	189	624	167	200	87	372	156	-85	98	153	222	-20	274	147
1673	703	1986	370	61	1588	488	823	1291	736	250	1087	712	1273	1699	687	369	520	710	1713	1755	1770	358	1376	1522	1211	2460	1126	761	1934	1579	2448	959	140	661	19	857	338	125	803	492	386	889	875	1279	1161	1227	941	2304	-546
1674	11279	10550	10589	4639	9042	10897	6959	7719	13657	8446	6420	11721	5778	10536	10536	5503	12447	5817	5226	9099	9958	12088	9783	8224	8297	9977	8608	10733	8572	6436	12006	11865	7945	7852	3800	3933	3737	4921	13002	6275	4498	7499	11032	24953	6655	15955	6474	26321	5165
1675	150	217	224	13	705	191	350	717	-56	-151	238	61	279	247	284	86	188	-170	-56	454	387	-15	366	253	45	708	-180	388	707	649	1014	-40	28	-51	199	332	1926	1232	210	525	145	452	408	358	301	426	123	1058	233
1676	-91	-169	-88	-44	-228	-17	-62	-130	-204	17	-145	-55	-26	-257	-73	-33	-111	-95	-106	-257	-106	-33	-175	-126	-137	-270	22	10	-339	-193	-246	-212	-208	-7	70	-120	-105	-192	-138	-16	-120	0	-185	-74	-52	-75	-13	-78	-72
1677	6688	22504	10556	5781	12429	10002	8595	10225	13180	7074	8067	12132	9830	15198	10664	6684	12312	12937	14080	13277	6793	12691	11551	8990	23566	12872	15203	10334	10315	11919	16483	14489	8876	11823	8846	13559	22401	18469	12332	16311	11535	10597	14220	6286	13786	13818	8886	9157	7007
1678	489	288	286	-472	438	685	186	392	3713	-3	368	167	5	755	2411	260	827	291	863	659	500	2863	336	381	2590	355	965	753	356	486	777	2398	303	678	375	55	-105	-209	1163	5	459	231	982	739	168	2686	861	-131	436
1679	-23	26	66	-319	-127	-1	-17	16	-15	11	57	15	-21	-116	-26	6	48	5	-30	-229	62	-55	43	-13	-27	6	39	12	-142	-7	215	-41	273	-42	-15	-43	-296	-192	-18	-111	19	-19	-261	-30	-61	-23	-43	2	-158
1680	82	8	28	-190	-165	-13	106	140	-142	41	-18	33	23	-213	39	27	55	-170	-135	-77	-133	-70	-40	43	175	47	62	-99	-27	292	152	-7	-65	101	133	-53	338	234	-50	-27	212	47	-151	18	69	55	50	165	92
1681	-278	-849	-388	-958	-444	-281	-306	-902	-567	-224	-663	-571	-628	-501	-328	-181	-614	-840	-571	-779	-438	-725	-372	-666	-498	-1156	-713	-434	-1024	-994	-987	-1025	-603	-234	-352	-397	-1153	-1291	-336	-473	-1068	-336	-636	-441	-575	-368	-367	-1055	-360
1682	38	-154	-35	-112	-139	43	66	140	-149	60	-6	-2	205	-71	-65	60	-50	-103	-126	-35	186	-114	42	83	-21	50	134	76	16	113	36	-77	35	-58	-50	-67	-423	25	66	-68	106	-8	-24	-8	-13	-48	94	-145	-34
1683	1133	1211	1153	547	2096	243	344	154	182	5275	493	2740	34	9010	661	233	291	199	2235	310	1169	817	353	700	1772	1875	2341	927	668	-49	809	990	2056	536	3037	760	899	7293	805	198	1035	415	487	1268	2791	6304	307	1237	591
1684	307	474	499	-56	927	-124	150	818	359	-31	54	212	-21	426	86	61	522	124	740	260	290	2308	642	5	738	-235	798	1229	383	493	225	426	161	63	665	136	-105	326	306	108	-198	325	182	186	121	1962	94	86	512
1685	35	-246	99	252	-190	-11	37	328	-99	-157	-31	139	85	-184	-97	18	74	43	-311	38	207	-226	-1	63	-92	15	114	-53	71	224	-204	-223	-55	-93	70	97	296	318	242	155	154	222	74	32	18	272	55	-22	-37
1686	282	199	252	315	-260	163	186	338	186	126	413	63	364	336	187	201	50	288	158	705	518	124	384	276	61	994	183	444	679	288	1213	102	296	142	309	168	656	243	525	51	948	284	419	347	292	107	446	582	498
1687	222	189	437	91	3215	397	255	2418	476	279	18	361	103	660	268	87	700	257	-20	1054	2246	514	211	520	506	2075	189	459	328	167	835	66	154	393	-336	205	21	360	362	114	2481	-62	259	336	183	1730	343	302	72
1688	-31	191	-46	16	12	-229	15	161	111	-9	-35	-88	-159	139	18	-16	22	193	34	56	-59	12	15	-203	86	-50	166	58	-147	129	215	206	52	-113	35	-177	84	-67	-160	155	-120	-190	-65	-89	88	26	47	209	-168
1689	-41	-130	-496	-1037	-57	-69	-366	-1670	-121	-30	-497	-59	-663	284	-343	-83	-288	141	-59	-243	-195	55	-710	-108	90	-1280	-160	-232	-1074	-1142	-751	-132	-641	-130	-375	-309	-232	-570	-136	-103	-1678	-145	-1451	-655	13	-134	-177	-487	-491
1690	755	164	1218	781	1385	310	490	1402	4329	331	964	985	333	2263	1579	221	712	4222	215	913	3315	139	1941	431	2138	549	1954	3156	1271	1344	1308	3008	2442	3291	340	425	31	1425	848	1205	1567	683	1413	1474	869	3613	1998	1741	4285
1691	4502	5057	2571	2398	1671	1847	1054	3123	786	1207	1373	3949	-524	1162	6336	-72	1207	1398	-197	3106	7444	3324	2745	537	1400	3137	2812	8443	3332	-98	9652	460	1173	3260	1068	422	-105	880	4814	960	657	2063	4185	5229	1378	3209	1764	9221	243
1692	-9	355	-235	-46	247	-121	8	-140	97	17	19	300	-183	646	672	18	-124	268	-158	-81	1941	115	-39	-237	70	-1176	-363	-122	-252	-356	-614	178	100	-89	309	-175	-719	-452	117	-24	-328	175	-162	64	-142	230	-50	-515	-237
1693	35	-56	26	82	76	15	-19	93	-89	16	63	-11	69	-139	-17	18	-8	-89	-45	151	29	-88	1009	104	19	181	55	22	-126	167	15	-84	-272	49	39	-27	-317	301	-93	-16	188	94	203	13	71	26	-61	58	-6
1694	61	311	-88	97	-1734	69	-313	-375	-171	-93	-270	36	-261	-405	137	-18	-3	-421	-150	-236	-316	-94	241	124	386	-731	-22	7	65	201	-803	-412	238	294	105	-106	317	-712	-168	-517	-377	-130	-300	-223	-215	-314	2079	-811	34
1695	62	378	88	63	254	23	46	164	171	137	165	182	114	405	134	35	174	112	116	-165	171	147	157	314	326	479	85	245	295	3	331	279	193	95	66	36	349	360	-2	136	401	-4	90	88	84	134	117	176	147
1696	59	239	33	50	177	94	0	231	97	54	89	102	154	113	22	83	75	138	193	246	124	45	57	53	137	279	36	168	186	56	325	151	24	101	-11	73	899	234	117	122	193	-72	365	79	164	98	129	288	48
1697	733	794	931	457	330	611	739	459	1071	856	363	1020	636	1497	656	656	740	456	968	1209	799	1506	771	1200	1022	1395	1080	856	575	1291	315	962	679	1116	775	845	931	142	1176	568	686	839	830	1359	908	1123	1388	926	704
1698	-28	341	135	220	-120	149	53	345	217	140	384	127	506	351	48	-52	-311	609	17	662	313	-293	440	433	376	-203	-399	99	-87	258	-5	226	83	242	-137	-76	984	-25	-104	-342	290	-42	151	203	155	-151	77	-120	185
1699	54	621	137	229	578	536	346	1851	2670	-24	888	-37	106	1790	2980	2180	76	895	1502	405	544	5848	1253	290	1873	254	360	495	794	1032	68	2806	1591	428	532	78	370	427	293	2351	299	2776	180	645	612	2773	573	33	945
1700	1408	1882	1031	1011	425	1209	559	982	1747	1079	1323	1942	732	4583	1061	843	1950	1048	1207	1276	1243	1646	1059	739	1699	2905	1316	1091	986	1063	1623	2388	1395	972	1178	1000	868	561	1150	1025	686	835	1239	794	1483	3144	1358	1783	752
1701	64	372	39	97	298	131	130	-80	149	-41	109	111	37	-54	88	-7	96	190	159	310	59	-19	117	130	163	292	137	79	164	75	378	230	167	18	168	46	275	-75	-42	288	-149	81	221	-76	125	146	-46	123	-192
1702	280	-162	-70	115	-266	-104	-130	-53	0	-45	99	38	-39	-230	35	-47	-115	-306	-75	-112	112	-154	38	-51	-135	54	-19	559	180	140	-173	-123	28	-75	-113	4	-465	-125	34	-65	-77	124	49	-54	-73	167	-64	55	-72
1703	363	672	290	200	-355	65	110	-214	351	174	79	540	-189	658	119	73	270	462	-17	264	-41	417	354	21	470	794	160	219	-334	26	730	-86	-116	-46	-105	-348	-137	419	445	-519	-164	-104	-458	22	5	528	-171	-109	-164
1704	404	224	412	274	578	181	246	1445	433	369	266	588	527	580	209	118	440	196	355	641	429	290	481	150	234	394	684	493	383	243	346	470	59	335	215	235	518	628	507	359	783	389	505	230	524	705	483	655	-68
1705	-184	152	-170	-695	44	8	-104	-10	-42	53	-292	364	101	81	141	-81	-308	219	69	88	38	6	-183	340	283	-619	-160	132	-202	-7	441	376	-350	-35	-74	242	-359	620	101	48	-469	124	-395	-374	-69	108	58	-403	61
1706	-107	-395	-75	-248	-362	-124	-128	-342	-212	-67	-166	-123	-237	-411	-136	-53	-204	-285	-342	123	-38	-196	-166	-35	-236	-63	-242	-194	-553	-368	-499	-393	-249	-222	-125	-231	-275	-578	-42	-187	-391	-81	-498	-186	-147	-267	-83	-274	-144
1707	9614	12445	6498	14815	3558	8734	7365	3274	9755	14931	10353	11500	10011	11976	8168	15046	10101	7189	8936	8316	6971	11889	12323	9170	5814	10759	5684	3248	718	7286	5864	12582	7302	4907	12608	12958	2583	2188	5668	8264	2418	11212	5939	8299	7191	9834	7068	2522	6934
1708	143	564	141	200	-413	-36	-93	-33	308	122	108	269	-301	55	242	144	287	77	278	222	59	252	328	-136	175	44	-16	-94	5	-387	599	417	694	242	129	-9	137	-578	88	-318	-77	-38	221	159	24	300	132	-53	58
1709	-245	-522	-195	-456	-393	-252	-324	-717	-221	-151	-404	-246	-503	-568	-237	-158	-413	-441	-537	-341	-136	-163	-363	-415	-500	-654	-474	-360	-548	-463	-1219	-662	-457	-192	-27	-376	-942	-1140	-312	-163	-469	-231	-419	-325	-466	-503	-377	-800	-230
1710	398	273	175	405	152	110	250	570	238	51	276	499	628	483	392	195	372	418	255	683	497	418	478	318	423	511	445	258	142	280	667	253	187	495	254	205	476	972	298	416	715	248	828	264	475	575	231	733	96
1711	543	1498	219	450	82	52	250	348	1265	353	76	556	15	899	345	78	162	415	451	486	467	2749	583	51	539	123	1614	1650	432	83	1213	261	496	360	1256	-41	317	209	549	5	91	321	257	142	131	2378	116	548	329
1712	5	258	-39	373	6	-27	39	103	56	-112	88	11	15	-253	-60	10	-18	83	116	31	41	-58	-72	94	-122	212	-16	94	-131	140	141	93	-29	-30	-11	-57	-42	-108	-240	204	-101	96	-85	-88	-58	-123	-35	-327	-3
1713	70	256	17	125	285	30	64	23	158	40	46	118	143	214	131	73	81	135	125	141	44	75	61	138	155	108	203	201	-5	60	488	58	42	99	35	108	529	184	0	117	246	96	-158	169	50	221	116	419	44
1714	99	343	137	540	571	59	42	100	191	100	85	131	151	142	113	86	125	138	132	208	260	82	168	73	80	540	55	227	180	132	246	47	144	55	270	36	370	444	0	204	266	404	115	94	93	39	4	397	350
1715	4	357	73	246	-108	46	64	13	4	10	38	21	74	-6	-19	-18	9	222	36	-126	201	15	55	-43	98	-44	101	2	-460	-87	68	-22	-43	90	-39	-53	84	-25	-160	-81	0	-32	-185	77	-39	45	16	106	41
1716	-56	55	-119	-252	-25	-79	-264	-301	-58	-39	-135	-118	-109	-33	-158	-41	-200	-46	-296	-165	47	39	53	15	-39	-600	-101	-171	-356	-299	-462	-114	-131	63	35	-83	0	-352	-149	-283	-116	-72	-176	-208	-69	-173	-86	-296	-408
1717	130	199	232	515	-146	137	128	556	184	18	243	137	317	314	78	78	250	236	146	405	334	109	163	272	305	483	252	339	465	356	656	526	193	143	183	194	-169	553	-82	209	178	70	388	328	123	252	235	531	85
1718	-194	-479	-26	158	-38	-4	-17	395	-180	-107	-77	-219	-61	134	-152	89	-214	-83	-24	183	-216	103	-10	-189	-78	-568	-19	145	10	-292	-267	-419	157	-91	246	-55	-158	-41	120	-272	-309	102	675	135	-84	-134	-95	-481	580
1719	718	1971	820	396	1506	648	137	211	2044	157	857	2341	338	840	2899	226	493	623	105	779	1548	3717	401	597	1758	546	311	281	663	2532	509	2771	1512	1356	731	20	-116	335	261	693	111	3004	288	604	265	3019	2053	506	601
1720	-311	-492	-767	-601	502	-192	-315	-1794	-446	-186	-669	-296	-463	-617	-230	-243	-428	69	-669	-345	-526	35	-707	355	-315	-848	-720	-774	-816	296	-241	-699	-418	-310	-230	78	889	276	-352	231	-1620	-332	-1092	-700	-417	-366	-35	-1327	-432
1721	119	41	28	272	196	82	22	-20	147	29	35	237	63	293	158	109	198	179	177	190	165	573	74	146	275	127	232	117	54	34	325	213	127	81	0	0	455	-159	186	155	198	98	268	84	71	541	-7	249	27
1722	77	325	-17	18	101	-60	-26	-120	-212	8	-109	-75	-66	-170	-8	-47	19	-245	-77	-144	-38	71	-23	17	94	158	-85	-53	-21	-121	-194	-55	-116	91	19	-108	-201	-528	-2	81	-145	89	-796	27	82	270	-22	-47	-123
1723	-12	-308	-119	-693	76	-255	-35	-348	-80	-122	-25	-68	-303	-160	69	16	-119	-109	-172	137	44	14	-35	-63	21	-438	65	-104	-87	-235	-178	-22	-17	82	160	-240	-179	33	-192	95	-522	-169	-149	28	-88	938	-56	-83	-144
1724	37	176	-66	-271	31	-11	124	36	88	38	158	49	-74	111	112	50	-53	127	232	38	-76	85	151	-122	258	155	137	-5	93	-360	-115	368	-15	215	39	-73	127	58	-85	174	72	27	243	147	177	740	158	137	41
1725	57	8	-51	-104	177	21	-31	30	11	33	-20	46	-45	-40	1	-4	4	-72	22	10	-68	11	6	-61	-19	57	130	-5	-71	140	-47	29	42	375	-129	-53	169	-142	56	-13	-91	122	164	218	65	100	238	22	30
1726	39	-45	-79	-179	228	-7	-28	23	35	-23	24	53	-58	117	32	-7	39	0	18	-116	-62	8	12	-13	94	88	157	-30	-93	159	105	79	29	93	31	-46	21	-234	-13	68	67	66	-45	-50	84	183	41	-148	-103
1727	65	10	-59	-390	152	-127	-28	43	3	-46	-126	-26	-109	52	-21	-75	-38	11	26	-137	-224	-7	-17	-166	139	-54	-72	-79	-10	-482	-157	-83	26	50	-78	-71	-10	-75	-66	-89	-77	115	-58	-45	20	4	-143	69	-3
1728	597	3449	1384	2069	2077	1014	2936	3066	3124	574	1427	623	1649	10619	2010	843	2776	4139	3109	5866	1912	3508	2733	1237	5684	3661	3408	4339	3162	1739	3331	2914	1630	2299	641	1044	4827	2129	3626	1692	5542	3053	6039	1777	3124	3627	1258	2609	920
1729	122	196	0	-130	705	208	66	335	440	45	199	182	298	464	404	129	171	638	260	634	651	201	473	138	691	400	186	342	65	531	257	3948	593	330	277	57	-31	1089	90	432	169	396	273	123	249	956	217	319	219
1730	906	-130	230	104	-2789	-175	-46	-20	-36	-62	-139	105	63	723	-1	-30	-35	499	-135	754	-210	50	323	164	350	-362	-160	534	734	-326	-115	184	100	146	-176	-131	-529	-2246	258	-982	-348	38	374	379	172	694	429	-795	130
1731	197	427	530	362	610	210	328	1029	72	171	361	374	436	536	299	160	55	268	427	631	491	175	92	330	462	108	406	309	822	949	530	172	290	248	86	665	1640	-176	245	435	686	272	471	433	526	261	423	1503	515
1732	857	1176	765	420	1118	498	737	838	1151	523	795	977	1092	1652	743	498	904	1080	1321	782	719	2155	1018	674	1422	985	1221	597	635	493	809	1165	557	740	716	635	645	1509	886	712	1136	1347	932	748	990	1362	523	789	522
1733	452	301	1260	519	667	236	670	1536	778	153	312	871	615	1486	474	201	406	863	396	722	426	1750	611	361	839	-286	540	480	1309	767	535	758	366	512	152	136	-52	385	779	234	686	323	1690	656	385	902	652	204	501
1734	68	107	-17	3	-44	81	57	-6	34	-6	31	67	61	232	80	53	101	86	91	-21	62	147	56	-45	191	9	72	-28	-87	-11	-99	75	163	17	-46	-32	-116	-226	-5	-2	125	-49	-176	22	33	83	23	-95	20
1735	2189	-201	1049	3979	-19	-33	-22	2069	-169	487	-202	6444	1345	826	-89	-26	-18	-118	-178	133	59	-81	-216	403	25	11633	442	29234	76	-467	346	-327	-214	50	-35	6090	-741	-8	221	-81	87	3814	-24	-66	560	-80	46	918	68
1736	-14	-1205	-210	-166	-317	-101	-88	114	-431	-350	-95	-321	98	-1620	-216	-46	-877	-141	-807	285	41	-1133	-437	-213	-1022	-416	-340	-306	-191	-451	47	-985	-549	-179	-403	-145	-1439	-989	-365	-185	-275	-383	9	-206	-252	-394	397	358	3
1737	1279	256	1269	955	654	575	756	741	393	480	611	1184	820	1108	899	535	745	285	666	698	882	1746	569	559	634	1150	196	638	734	516	578	931	452	471	446	485	486	528	875	987	1131	1047	812	785	509	2402	701	747	532
1738	-29	-596	-90	-46	-19	-4	11	-134	-556	-123	-70	-100	-103	-1476	-103	-121	-321	-23	-174	-130	-174	-494	-120	-247	-96	-174	-160	-74	-115	-102	-241	-858	-1328	-21	-117	-145	-52	-561	-104	-70	-188	-156	-200	-66	-157	-83	-89	-106	-106
1739	285	-497	119	211	444	275	250	6	-233	-32	152	416	183	-221	297	107	247	-11	384	208	112	1674	97	53	275	146	353	222	257	235	283	-417	-2517	324	86	134	74	620	405	38	106	229	291	98	185	879	-29	159	137
1740	290	-164	46	170	50	108	8	67	52	186	1	754	47	372	550	176	642	190	340	274	156	920	7	-51	427	152	297	79	49	26	-31	-200	-682	267	-39	9	-116	176	256	-38	319	267	198	38	185	704	50	201	-48
1741	84	-41	95	145	565	84	59	60	105	-18	30	104	79	445	424	216	182	124	102	165	911	162	52	3	126	171	500	592	306	79	162	-89	-256	318	242	85	63	553	152	152	-9	175	79	96	164	678	40	386	-30
1742	86	-199	44	87	482	98	8	-124	-11	-16	-30	4	5	273	117	84	-104	86	144	490	251	-47	122	152	47	-85	196	-114	-295	-15	-157	6	59	67	-54	41	201	553	-2	234	-77	306	-45	-11	1	170	102	282	-13
1743	-217	-816	-674	-594	-432	-404	-375	-1348	-700	-298	-716	-503	-580	-1166	-423	-292	-684	-759	-622	-528	-657	-335	-517	-682	-943	-1131	-907	-539	-1277	-1006	-1576	-983	-557	-240	-411	-404	-1820	-1836	-306	-492	-1006	-306	-742	-601	-395	-844	-517	-1520	-402
1744	196	509	64	14	470	256	268	415	786	62	155	971	122	1213	333	164	585	753	995	412	328	592	290	158	1603	597	658	362	350	144	525	881	337	392	133	305	730	670	296	242	38	-4	266	347	374	1076	268	450	89
1745	151	0	113	577	12	181	99	318	155	0	87	145	186	6	149	29	103	28	-3	408	574	40	346	-15	96	435	101	242	383	349	283	0	12	175	254	73	275	150	330	144	488	143	286	264	262	468	41	478	113
1746	1977	843	736	659	590	900	446	986	1239	142	700	2156	511	534	655	223	302	413	-15	994	595	1294	1213	589	196	-543	769	2192	-202	736	1649	281	532	1654	305	328	-391	888	661	296	-261	160	74	1203	213	4170	262	1315	-357
1747	149	100	181	257	260	204	-31	550	12	110	246	121	162	-142	105	93	251	109	368	363	574	129	161	69	82	807	464	76	137	250	877	-25	83	146	422	-50	317	259	114	51	72	124	137	294	20	313	71	218	44
1748	-23	-338	-55	-171	-120	-91	-37	-77	-205	-8	-37	-77	90	-836	-41	-33	-63	-28	-3	95	-59	-161	-78	-140	-98	-50	-75	-102	0	-26	-231	-255	-300	-37	39	-48	-95	-410	-114	-38	29	53	-223	-77	-82	-67	-13	-36	0
1749	184	251	150	179	565	30	-15	436	325	10	164	237	634	224	252	107	111	742	380	874	358	205	281	1279	342	327	631	56	274	41	972	361	131	1393	23	524	878	829	507	277	483	327	-447	900	196	366	1670	1007	213
1750	157	174	-75	-678	489	131	190	503	-208	-143	-50	224	31	349	-52	-13	-52	274	-220	-310	423	409	-185	75	21	-616	-78	178	285	288	-945	134	-126	352	11	48	116	494	640	-84	135	-8	625	-89	-104	-85	86	685	343
1751	-339	-700	-525	-923	-1080	-368	-341	-100	-505	-111	-554	-267	-844	-634	-337	-49	-469	-303	-849	-867	-896	-249	-381	-806	-451	-1764	-353	-789	-372	-1135	-1360	-530	-461	-239	-254	-372	-3673	-1945	-205	-870	-711	-711	-117	-326	-209	-431	-840	-1732	-168
1752	136	325	237	1	279	271	186	305	329	91	233	514	79	815	466	129	337	320	135	493	1349	595	106	211	579	1052	428	286	213	292	409	636	184	334	137	231	232	234	376	247	662	207	149	106	344	352	238	506	30
1753	-78	-159	31	-143	-38	-20	6	-73	-68	27	0	-18	42	18	30	64	-25	63	-132	137	124	55	-17	-69	206	-9	150	5	10	-98	-136	-58	-8	252	97	-64	148	-201	184	-16	-77	17	-45	47	35	-14	31	-137	27
1754	45	-35	-6	-29	-88	53	48	194	72	41	11	39	-42	15	134	-20	138	-28	169	200	153	44	26	-25	90	197	-22	-40	137	60	178	114	144	-17	-50	4	95	201	322	-5	125	21	121	15	114	62	5	495	-3
1755	-75	18	-59	-695	-444	31	-184	-164	-5	58	-157	66	-47	235	69	-4	86	31	387	144	14	121	-58	106	86	-117	91	-158	-131	83	26	-41	-38	-86	-93	110	-285	-234	-189	-92	-82	-147	-282	-98	-26	-22	-50	-179	-82
1756	120	100	-8	29	-31	5	17	83	32	72	-23	65	74	146	95	49	110	46	210	179	112	68	-28	144	157	200	229	68	120	288	-152	134	163	47	50	138	412	184	154	127	309	-66	121	10	123	45	216	25	123
1757	59	-97	28	237	19	-13	119	-16	-122	33	-64	-33	2	-152	-129	58	1	-161	-151	119	0	-22	-97	73	-102	-9	94	-81	186	360	-152	-102	8	-65	11	18	42	125	34	16	-82	-29	90	-88	-31	-118	-28	338	99
1758	16	40	122	358	-571	-20	-115	-238	-95	105	-21	-225	10	-78	-16	-64	-91	-239	-392	-70	47	-54	-62	-116	-425	642	45	112	65	-505	-115	66	-441	-10	137	11	-1535	-377	77	-585	-82	-143	336	-115	-151	-26	79	-305	171
1759	31	53	124	7	241	44	95	77	131	9	72	76	55	336	217	64	110	173	122	102	195	167	94	-81	608	-63	209	48	93	-94	189	363	193	-19	31	50	751	192	200	312	266	-6	176	-1	149	455	-64	207	-3
1760	178	352	230	175	-63	140	142	167	152	60	265	288	151	433	235	109	175	231	311	419	361	217	222	77	514	-9	347	56	509	189	310	225	258	70	215	238	328	217	181	258	43	186	167	120	305	285	226	405	-24
1761	51	-201	-17	-276	-177	118	13	-244	-192	-18	24	-294	122	-646	-357	-70	33	-453	-1089	528	257	-63	-101	65	-545	60	-288	38	-285	-349	178	-109	-59	43	-31	4	-804	-570	8	-389	-367	-169	-252	15	-146	-223	-26	-123	3
1762	29	-80	-228	-284	-171	-40	250	-167	337	68	-185	90	-279	-78	-173	-7	-224	424	-277	10	-150	811	16	21	350	216	-225	-148	-49	-508	-110	-7	-25	-78	-109	4	-31	343	-224	-65	-386	66	-239	0	-192	207	-26	-237	6
1763	8238	22000	13631	6620	14812	15063	14720	18484	11450	2916	9230	8700	18041	13382	10934	8150	11708	5245	3188	22161	11612	16034	18007	19827	32667	8670	25474	22388	7733	15595	16137	10645	8319	18362	8048	4190	13137	41005	12655	4558	9915	27270	17665	17822	27757	12624	19366	15512	6931
1764	103	-10	126	542	413	-23	-64	-103	129	-18	181	512	415	409	89	138	26	274	211	-137	-287	512	3	419	-269	425	55	145	-180	250	394	433	-92	117	-86	314	307	-117	0	97	348	128	-153	191	129	166	-47	-811	295
1765	18592	17586	27262	28342	9766	22308	18072	16793	21273	23518	23286	18582	19900	18913	20260	29042	21694	17772	15249	10143	12867	21203	15490	27239	13194	18006	9577	17512	9465	23257	10987	20361	24864	27718	12584	23689	6510	11091	10579	16175	8861	15204	8646	26547	10948	18437	25779	14291	26588
1766	12812	11958	14633	13856	12238	9733	12913	6934	14878	13671	10235	12512	9801	12363	18479	19986	14970	14136	13462	7104	10345	15112	8270	17007	9495	9958	7236	6774	5179	17034	8780	12860	18479	15857	13089	15166	5727	13154	7469	9418	4938	10848	11387	22122	7232	12622	17824	8085	21509
1767	11127	20280	6913	15219	4238	10806	8690	5347	15278	18254	15974	15615	9348	13233	17946	11066	16436	9688	13396	3585	5476	14485	13562	13839	7596	11588	5363	7278	2861	10841	3694	17958	14783	9756	18115	9660	2117	2925	5100	7924	3555	9432	5955	15389	4529	10706	12678	3412	10299
1768	13	-88	17	-170	-38	60	110	80	-4	-8	-108	-28	-37	65	60	26	-20	25	-20	-119	38	25	-79	-21	151	-19	-13	-120	-224	178	-78	-63	-105	-35	23	71	74	251	-13	95	-9	149	329	-44	67	0	94	-179	34
1769	-52	-164	-66	-312	-419	-108	-13	0	-117	-6	-91	-3	-130	-196	-59	103	-46	-314	-153	155	76	-37	-97	-142	-39	-162	-225	-51	-153	-68	47	-72	-83	-54	-54	-64	254	-419	-72	-89	-116	-8	-112	96	-61	-73	-49	-81	30
1770	157	201	128	16	266	40	170	674	74	15	70	246	290	2803	107	23	387	66	25	0	171	365	133	-53	244	168	396	278	-104	110	252	141	45	77	195	69	-31	310	29	65	469	-44	65	20	198	511	-65	246	-10
1771	11	8	-31	-97	101	17	-37	-171	-23	-114	-25	-4	-61	-76	-50	-50	18	-34	68	0	26	-36	-15	-122	-13	-305	-6	-120	-411	-429	-446	-56	-137	-34	35	-191	-232	-343	-208	-119	-174	-218	-130	-147	41	-88	-47	-576	-151
1772	-292	-631	-585	-1044	-387	-272	-366	-583	-316	-207	-342	-305	-471	-204	-255	-286	-337	-505	-516	-408	-482	-303	-561	-478	-518	-1223	-808	-871	-1266	-554	-819	-778	-336	-384	-512	-452	-963	-679	-293	-389	-798	-287	-810	-428	-402	-582	-617	-1153	-426
1773	229	459	255	-14	787	55	199	352	188	139	58	62	106	363	182	60	253	127	446	433	130	197	277	-112	301	158	363	199	301	79	714	275	263	175	191	138	497	645	290	348	111	-29	155	147	252	395	305	148	-134
1774	373	645	632	72	184	408	170	895	1319	485	657	770	855	1453	491	130	1019	1984	488	2048	1124	649	1450	812	256	2584	762	454	2017	767	1697	889	1280	573	751	309	0	1316	792	280	735	447	758	272	582	1019	122	-33	580
1775	6284	10992	7181	3020	7466	6449	4821	5726	12380	6741	4712	14383	7078	16517	8530	3275	11330	22674	10857	8436	4626	7758	5097	4748	25632	5543	14885	6853	7552	3113	8097	13832	6457	5929	5237	5251	8585	8987	8772	7875	4029	5159	7933	4427	8213	12697	4516	8132	4426
1776	15	77	117	-127	-101	-56	-64	127	-3	44	86	58	98	51	-27	20	70	66	108	35	-32	2	-21	-152	21	25	140	-22	-115	11	126	110	116	-26	-15	2	-317	226	21	-13	-135	-4	-209	-27	80	64	65	142	89
1777	55	-58	-4	-110	-38	-57	35	154	-53	-76	45	-2	2	50	-1	-30	-6	-8	-163	35	-29	-61	-34	-102	-82	73	-157	2	-5	-102	-31	17	307	-27	-7	78	222	-117	93	87	-120	-14	90	174	-18	-94	-85	-125	-123
1778	3091	2073	6045	1424	3475	3514	5270	8155	1934	2883	2798	5663	3434	10265	3096	3587	5255	2544	2988	5069	6293	5573	2903	2673	5124	6271	5294	4451	4598	1788	4340	4109	2465	3042	743	3187	4192	4887	6386	2489	6229	3205	5043	3282	3961	5408	4032	5624	1649
1779	116	-367	-48	-54	-146	-36	-77	-30	-454	100	-28	-199	-10	-280	-80	4	-12	277	161	91	-82	-187	-202	-7	-72	-276	-121	-22	38	37	-446	-577	-339	135	70	-67	222	159	109	119	-178	-109	-230	-147	-256	18	-74	-383	-58
1780	899	1516	257	140	635	361	204	523	658	303	339	1271	250	2754	622	140	519	499	497	246	287	1534	309	441	945	181	825	390	169	-87	325	603	113	1111	246	198	529	653	400	204	585	287	293	915	397	1844	592	649	120
1781	-155	-792	144	-89	-679	-97	-4	-97	-453	-48	-7	-162	45	37	-52	-164	-87	23	-288	193	-68	-148	17	154	-435	-15	-108	-148	65	26	-115	-21	-70	9	109	-143	-243	-360	-125	-288	-207	-194	-214	-11	-395	-71	-14	-176	-51
1782	75	405	230	138	19	221	-88	278	461	47	58	262	181	493	148	61	199	239	444	144	47	195	139	85	586	581	376	214	230	-140	630	509	587	139	105	-6	656	201	242	236	474	49	38	148	192	302	301	190	72
1783	114	251	57	-100	-216	108	-142	-154	845	5	138	54	-77	-62	120	69	-89	-158	618	-165	-165	-54	293	-69	1518	-228	409	107	-263	75	-241	258	252	272	137	-16	-465	-293	146	165	-217	55	4	116	-99	762	165	-557	168
1784	149	950	366	214	940	350	315	288	696	275	200	408	1007	708	697	173	802	528	898	1015	458	422	1021	391	890	1042	674	224	718	561	1113	905	306	263	230	330	698	721	360	345	372	323	1085	441	940	1081	394	979	209
1785	564	2735	752	95	425	452	779	348	743	420	440	1431	418	2089	478	409	953	254	332	169	512	3590	628	322	1231	1223	550	416	728	284	1119	1012	806	411	798	436	423	628	883	522	82	522	426	203	631	1346	105	655	257
1786	-29	-271	-19	439	-266	-31	-144	-285	-159	53	-170	-44	-178	-63	-138	-52	-178	-5	-132	-59	-186	-119	-120	-158	-110	-69	-55	20	-158	-554	-105	-235	-217	5	-31	-85	-635	-612	-32	-146	207	-186	-268	111	-123	-163	-135	-226	-82
1787	75	172	197	272	9519	78	26	-30	1073	22	699	120	15	102	760	98	145	993	156	299	520	198	537	270	525	422	176	247	389	372	357	1155	317	227	528	309	137	578	-45	571	-87	92	189	231	103	1605	540	585	336
1788	-9	-132	42	13	50	1	42	53	49	11	54	87	2	172	49	-33	58	202	-204	-7	74	150	58	-37	84	155	-39	104	131	-235	183	136	175	93	133	64	179	-117	-2	-29	125	87	-60	62	-13	134	-104	36	-106
1789	-62	224	-102	375	88	-15	-8	-87	-22	-39	-44	-44	29	242	44	20	-31	233	-12	-81	118	142	-57	-114	177	-349	49	71	323	-129	-120	-15	263	-26	62	13	359	100	96	-70	-299	2	65	-32	-7	-100	-61	-254	144
1790	2151	3716	5022	3015	3488	1525	1664	3119	2173	1285	2201	6334	2650	7007	1984	1446	3034	1380	1419	2386	1465	5388	1789	1330	1118	5530	2200	2072	1803	1344	2159	6779	3250	1349	2035	2295	2276	3915	2017	2163	2307	2416	2363	2322	2910	4506	1268	1839	962
1791	8	58	95	-108	44	-18	-73	-127	-121	-44	-28	155	34	210	123	-72	27	129	142	-77	106	44	128	150	254	123	68	-25	153	-15	21	141	221	65	31	124	243	402	90	168	-251	-66	-270	-199	84	218	140	30	116
1792	67	-62	13	46	133	-69	-44	40	71	9	3	-16	-21	271	22	23	30	43	50	-250	-29	48	-6	27	41	-12	108	0	-32	132	-162	184	154	-109	-93	-11	169	461	104	-2	72	8	74	25	-44	93	98	176	-68
1793	672	688	4	151	635	300	6	-124	404	275	214	482	-191	465	323	75	37	-98	323	28	455	359	3	176	575	54	320	171	137	-258	-120	631	386	115	121	-196	1005	1198	168	304	217	-49	453	76	-11	964	-49	-204	130
1794	33	-430	-84	-601	-305	-197	-173	-415	-271	-89	-262	-158	-338	-408	-200	-10	-244	-311	-408	-267	-911	-262	-108	65	-693	-1141	-759	-148	-745	-455	-1513	-323	-378	-375	-305	-2	-486	-620	-29	-304	-1480	-239	-1065	-269	-123	182	-146	-1248	-659
1795	-337	-1019	-394	-495	-362	-398	-297	-1405	-1028	-166	-769	-374	-434	-865	-604	-258	-757	-216	-1184	-807	-654	-542	-684	-429	-988	-1067	-576	-743	-1024	-763	-1760	-968	-762	-347	-493	-337	-4721	-1324	-304	-576	-1262	-338	-1237	-797	-477	-1136	-349	-1478	140
1796	732	2591	1180	562	1099	572	694	1251	577	420	616	1546	372	423	681	110	756	410	264	1815	1329	1507	2096	961	687	807	1077	981	548	805	4350	763	388	862	653	434	561	1634	1257	299	856	657	1241	1510	603	792	816	1884	567
1797	-92	-187	-28	-185	-476	-120	0	26	-149	-20	-112	-100	-21	-242	-87	18	-68	-92	-180	-257	-213	-87	-64	-57	-214	-260	-130	-114	-356	30	-178	-178	-273	-47	-101	36	-296	-8	-45	-10	-241	-6	-241	-126	-112	-143	-58	-128	-13
1798	1	60	366	61	406	4	-53	53	-37	-31	102	153	42	-136	20	52	38	8	-65	-3	-298	52	126	-90	-33	-511	-36	-28	-147	-60	-304	4	288	95	-125	-13	127	-125	328	43	-62	-38	288	-86	421	20	-322	83	-292
1799	-93	-345	-264	-218	25	89	-93	-244	-250	-119	-256	-69	-231	-171	-64	-86	-222	-314	-270	-338	-390	-81	-252	160	-238	-524	-255	-403	-98	-102	-493	-310	-156	-113	70	87	-1175	-234	-133	-296	-372	-96	-492	-413	-147	-215	-38	-467	103
1800	116	-6	93	65	-63	59	99	134	-62	-79	42	86	79	120	-13	6	-91	63	65	229	47	-5	147	-148	-263	244	-13	43	54	-60	362	-29	1	1	-125	-50	-21	-41	74	-2	-178	-70	-544	-28	52	127	108	198	-147
1801	404	403	259	332	120	142	210	405	276	135	257	761	194	1413	386	163	703	528	655	246	494	277	453	47	716	578	730	268	334	45	383	663	367	364	-90	191	31	159	416	176	561	-27	293	218	511	546	152	293	171
1802	281	-291	179	-349	565	-28	-99	-318	-561	-211	-396	829	-423	-210	-190	-209	-127	-34	-506	169	-204	103	600	399	-389	-715	121	316	-718	-375	-325	-1065	-711	650	-70	291	-1122	217	117	95	-1122	-319	-988	523	672	1018	237	565	-1000
1803	54	-82	11	211	-12	-5	104	0	-116	12	22	98	-37	-42	-43	-16	-21	17	-25	-3	103	-95	60	13	11	254	-36	-35	-60	68	10	-18	-62	181	31	18	-232	-243	0	16	-33	44	47	76	18	17	-68	72	58
1804	830	2924	1896	749	400	1206	828	670	3010	1619	1868	2544	522	3104	2106	1090	2329	785	2562	620	361	3672	691	409	1880	1563	831	620	400	656	588	2512	1778	717	630	1109	825	243	749	838	503	799	954	511	822	2838	880	450	642
1805	22	-377	0	271	139	202	359	338	64	39	126	-202	234	-279	-98	52	36	404	-282	609	100	-62	311	257	-210	317	311	68	-515	383	541	-23	-146	54	74	240	-169	25	293	2	280	44	47	243	369	10	385	251	20
1806	-187	383	84	-61	-419	36	-15	-100	251	-209	-11	-124	50	489	216	-9	310	283	215	116	-11	-28	161	0	380	-1074	-386	17	-197	26	10	37	-75	81	-320	78	-1249	-159	-88	-168	-140	0	-1006	133	-369	254	-192	-750	-58
1807	2323	380	-77	104	203	17	-26	248	202	-52	-31	156	-114	414	351	-58	42	115	282	-169	-56	18	26	-1	356	384	-78	56	169	-117	541	384	170	61	-54	-53	95	117	109	209	522	-40	99	82	56	434	-10	769	250
1808	347	259	68	209	30577	79	110	174	157	-17	314	82	71	-16	208	93	-17	207	-29	109	177	405	985	409	104	410	314	396	54	235	131	222	329	155	223	166	402	603	176	566	-24	66	65	289	29	868	459	260	92
1809	202	591	51	207	82	92	84	-16	702	33	1027	59	133	50	1273	21	8	20	778	225	-68	45	1140	2559	1544	362	16	227	54	296	283	168	255	3214	219	0	307	217	-21	1387	270	51	133	509	28	404	4074	473	164
1810	251	595	556	502	921	136	277	684	586	114	380	388	309	662	365	213	344	488	694	486	414	295	476	363	577	1156	651	508	893	360	1571	712	520	384	168	332	8871	897	461	220	831	184	697	614	346	529	434	1212	316
1811	664	68	-727	-794	1582	-564	-519	83	950	-266	-503	495	-993	920	371	-87	864	-1210	-394	253	-476	384	193	-5	39	-3613	-222	-327	-1677	584	-3457	1210	797	-102	-1017	-1178	-645	343	-130	198	-1813	-878	-512	-253	-1277	1442	-599	884	-1199
1812	44	112	155	228	196	147	110	305	-89	20	76	72	194	-72	92	86	54	31	70	155	177	24	145	85	25	702	-193	186	279	-60	199	104	-149	43	62	147	645	461	58	193	401	186	162	233	127	101	137	215	223
1813	-142	-449	-39	35	-165	-149	-144	-83	-436	122	-193	-51	-189	-279	-201	67	-365	-410	-174	-486	-97	-186	-451	-735	-37	-168	-173	-114	-27	-1742	-1245	-718	7	0	137	-272	127	92	312	-639	1068	79	-636	-245	-320	-118	-734	873	-288
1814	104	321	173	158	457	155	177	50	-703	62	169	77	181	-352	90	24	238	89	332	165	227	-268	117	181	592	556	291	120	712	205	751	140	-259	46	74	152	518	721	229	198	188	55	266	176	297	141	92	431	65
1815	-105	-82	0	-416	-177	-136	-175	-234	-381	-30	-81	-74	-255	-383	-131	-58	-207	-193	-160	-356	-216	-187	-112	-229	-128	-384	-29	-102	-169	-508	-299	-252	-99	-11	-133	-295	-211	-402	-197	-70	-149	32	-334	96	-187	-152	-41	209	-27
1816	-62	-353	-144	-271	-413	-65	-190	-174	-299	-46	-99	-144	-186	-577	-136	-106	-149	-170	-211	-215	-180	-128	-115	-168	-279	-479	-150	-84	-531	-239	-362	-286	-86	-42	-54	-113	-423	-176	-90	-171	-14	-12	-248	-74	-114	-180	-71	-232	-48
1817	-434	442	-479	-971	63	-121	-410	-1563	-5	-59	-592	-131	-151	211	74	-195	-229	-297	182	155	-423	145	-451	-363	-155	-864	-186	-436	-904	-626	-798	-343	293	-85	-93	4	-296	-150	-218	242	619	-126	-1043	-16	-179	92	-79	-895	-408
1818	2845	3903	1171	1261	1347	3188	1129	1170	6541	3110	1861	6079	1073	4634	3258	2378	2724	1522	5284	951	2291	8371	1619	1101	1796	2129	2540	1249	1282	1469	1949	4012	2495	1627	974	1553	1206	1970	1091	1913	909	962	882	1169	1187	5551	1283	1763	704
1819	91	3	13	-91	-171	-34	-130	221	21	71	115	49	221	-1035	79	98	112	31	251	176	266	-374	145	110	116	197	124	-30	-109	315	478	51	-904	230	-35	161	52	-419	170	8	145	-68	97	-44	35	276	119	-162	209
1820	101	-206	15	-117	-120	100	-48	140	-167	-6	-77	8	77	-308	-67	-16	19	-31	-134	-426	-133	-54	3	65	-98	-216	-225	15	109	-64	-21	-150	-72	-83	-23	55	-31	50	130	21	111	-351	-33	-59	-11	-24	-19	-44	61
1821	2334	737	545	732	2249	490	317	1523	558	338	461	638	764	863	528	423	561	730	716	698	997	399	546	1413	1183	1786	857	1091	2312	1420	1770	769	640	907	501	582	2180	1500	803	533	1010	452	1801	1117	1749	1059	828	2830	1123
1822	1471	405	1104	607	444	959	1283	1848	658	242	1202	1377	319	1791	611	595	1626	101	198	1625	1669	2200	778	899	803	1252	992	1666	761	315	457	864	698	2000	187	753	952	1274	1545	489	2215	1334	1878	1345	1418	1147	1392	316	704
1823	1305	122	255	194	889	1681	470	603	-114	144	187	1218	167	2589	219	693	763	751	69	1085	1391	1023	209	1202	971	2787	1466	1088	-153	410	157	-121	87	921	-39	741	2032	2045	667	193	1528	222	-149	389	505	714	1005	674	226
1824	15	-113	-28	-261	-425	-47	-68	60	-94	-9	9	-40	-130	-169	19	-7	-68	-173	-89	-133	-68	-5	38	-27	21	-155	-45	-33	-82	-277	-173	-76	63	103	-121	-6	-476	-452	-2	-2	-435	40	99	-137	-129	-65	2	-100	54
1825	1047	1144	993	222	514	651	808	345	1182	503	799	1842	181	2612	1142	575	1615	352	689	317	657	2725	211	310	998	619	933	725	38	174	262	1042	644	1012	246	575	465	1190	1446	525	652	895	437	479	771	1958	547	568	223
1826	102	499	139	-1	476	147	246	234	622	104	158	465	242	1395	550	107	938	309	412	45	423	1064	220	201	984	400	373	275	180	60	289	551	262	327	-23	97	571	628	221	340	386	92	293	150	187	1018	137	-139	79
1827	163	393	290	256	317	289	-17	261	64	150	123	370	231	68	60	216	60	320	921	130	-2	297	303	346	512	-57	111	140	71	186	99	385	309	159	-11	201	243	427	-88	258	67	128	83	259	50	1081	283	-33	140
1828	173	-224	252	418	139	-75	326	553	96	87	331	394	37	814	154	166	351	-430	186	126	11	122	220	-63	657	-19	602	812	772	-368	-278	28	113	355	328	-92	751	829	525	261	111	190	462	426	760	294	540	296	412
1829	1134	124	612	-269	-775	289	372	130	494	179	488	662	407	1393	683	324	670	-173	327	433	603	721	606	332	846	1023	1103	641	197	-512	110	329	15	690	520	-9	-497	-578	1248	-217	-406	246	553	1257	1092	876	467	1187	-134
1830	136	152	610	114	1181	72	130	97	189	102	215	391	167	475	291	124	476	164	229	257	278	537	226	201	226	133	301	242	548	326	399	404	137	678	215	383	1471	1358	362	291	304	263	65	766	415	333	407	-159	216
1831	67	145	35	-46	305	57	33	3	204	82	30	271	-90	441	215	24	151	248	308	-70	-91	353	120	88	458	66	170	168	65	-121	246	97	68	158	-58	18	201	8	42	68	159	96	-139	74	161	633	128	319	-116
1832	455	558	239	205	330	355	470	211	1395	313	158	1568	93	4104	885	329	905	947	436	423	595	1033	254	193	2572	880	1060	367	367	102	662	1530	583	481	0	360	783	1701	571	718	609	342	408	196	758	1859	247	615	223
1833	219	373	115	149	95	91	6	-43	390	97	87	426	95	1684	479	64	289	343	326	116	124	954	218	181	732	473	291	206	5	417	294	444	282	251	97	80	-10	628	56	114	328	154	182	194	252	596	111	372	-6
1834	63	266	106	192	-12	4	22	43	125	82	73	120	119	163	115	81	50	190	178	-17	-14	48	152	90	153	155	144	160	21	121	478	155	109	98	-11	-18	328	167	98	108	101	81	149	71	3	254	153	153	51
1835	1434	698	1566	628	1118	508	768	1606	1493	523	855	2198	884	3546	1424	675	1193	1198	999	1205	435	2040	984	945	1916	1694	2017	1162	750	558	2695	1964	493	1235	230	986	1280	955	1107	751	1010	1013	1056	1334	2045	1661	1150	3286	340
1836	679	36	-59	-194	-88	-7	150	140	142	-34	9	266	-98	225	4	30	65	213	-150	-130	29	547	7	130	289	69	101	-66	82	-269	-110	-155	-147	203	-11	-127	-63	-326	101	-127	-82	-74	-121	174	7	569	-129	-195	106
1837	274	405	377	342	381	477	326	181	483	135	172	362	367	1855	367	423	404	664	966	895	609	828	663	626	1849	1420	1008	296	591	615	819	829	390	517	164	510	1355	788	784	427	328	640	453	528	989	839	471	389	295
1838	-301	-330	-414	-676	-266	-311	-224	-905	-241	-447	-376	-1	-463	150	-134	0	-440	-23	-117	-666	-479	-64	-298	-340	-29	-788	-173	-380	-1342	-717	-399	-107	116	66	-681	-383	-1259	-511	162	-582	-1383	-70	-614	-460	-440	104	-373	-1007	-584
1839	5789	7782	5657	5792	2154	4024	3043	2338	8991	4911	6894	11097	1875	7142	6953	5753	8973	5118	12075	2016	2530	9037	7512	1856	10419	4310	4004	1988	1775	1329	2459	11586	7801	5815	3601	5036	3800	3353	3069	8958	232	4011	3804	5151	4628	10794	3764	2612	3745
1840	41	181	-201	-123	400	100	-55	-43	-141	-47	-108	-39	-162	80	-45	-36	-115	-14	5	-232	-79	26	-106	25	102	31	-85	5	-54	-193	120	114	157	-46	-195	-46	-42	435	-90	125	-469	-72	69	-193	-28	102	-55	89	199
1841	17894	11911	12455	18998	2776	14580	10102	11033	16193	23506	19952	15746	14015	13600	17487	23102	15021	25213	21001	8228	10914	16491	21426	16592	19093	21187	8447	8006	8287	13928	8838	15635	16089	18741	14729	21332	5367	5424	12599	15805	9804	19815	11804	24416	13159	15154	20466	10725	18086
1842	327	2343	241	-9	11952	362	528	587	1025	95	656	749	764	2256	1034	403	477	1860	1127	1724	473	680	1203	630	2186	2250	900	569	1041	1097	3126	1682	881	644	262	635	3758	5499	605	4345	1446	666	1216	406	1118	1681	456	380	-85
1843	41	97	62	89	101	33	62	258	21	-22	176	103	53	-34	45	21	63	-83	193	338	35	-13	60	59	-53	28	157	140	1315	64	409	82	200	79	-31	57	-10	-276	795	258	986	0	1749	-10	226	55	180	89	24
1844	-12	75	39	-35	120	-44	11	-67	-25	-5	-6	-9	31	-26	-2	-1	-11	-66	56	-408	-68	-50	-3	-11	84	-22	9	45	-109	110	204	26	154	23	-11	-99	-63	486	8	62	96	25	85	-38	65	7	55	-25	-137
1845	1837	1758	7166	5598	4530	3110	11277	5904	1597	1043	1662	1932	2760	6953	1235	1324	2262	31	-265	14705	2311	2876	1728	5940	1128	731	4273	6572	10391	3557	3993	2070	1626	2398	1401	3935	539	-285	5278	-2089	1489	5303	9328	3028	7653	953	4340	1674	3199
1846	-109	-333	-44	-97	2605	194	126	583	-475	-124	124	-249	26	-105	-274	12	-285	-31	-272	35	485	-287	-47	227	-466	279	-186	0	10	-239	-425	-265	-191	-110	-7	180	63	637	176	119	-198	-248	-307	-281	1	-243	307	305	-711
1847	379	1062	199	443	2395	376	561	1261	658	48	194	223	239	742	449	80	531	1273	-11	553	642	373	190	1032	451	1544	379	766	1238	1253	1061	586	508	362	148	187	3345	1224	480	1551	1209	719	460	599	537	715	850	1413	831
1848	19	172	6	125	69	44	62	-93	156	-10	52	-33	23	-49	63	-18	100	-184	160	-98	-165	51	124	-79	57	73	45	-12	-5	-79	36	11	38	-11	-3	60	190	-301	104	-114	58	23	257	32	41	50	-11	-55	134
1849	351	496	137	297	-463	247	173	301	540	44	616	163	623	665	212	12	187	239	248	902	737	224	290	170	427	877	494	646	608	280	662	501	219	219	144	60	63	586	306	-179	246	149	354	213	243	724	402	873	195
1850	631	-51	48	205	88	23	144	-278	113	75	-14	251	191	-17	247	-30	157	138	266	21	322	48	98	104	82	1563	281	219	197	53	567	124	-184	18	223	71	148	-234	-56	2	48	-216	-45	0	104	267	20	389	-75
1851	-12	732	126	564	190	-163	1045	721	-271	160	-199	1312	-191	5745	725	43	884	534	-283	4103	1598	2336	-46	-3	919	584	2508	2915	5174	-478	4151	903	58	622	379	411	2064	1743	3880	-451	2486	462	3740	22	1839	199	337	2863	515
1852	17	56	44	-173	69	63	6	-127	72	-41	17	37	-125	36	95	26	72	83	180	45	91	40	-88	174	108	-123	121	30	115	37	-52	98	-7	-5	78	53	95	301	117	-48	299	21	153	-40	65	134	74	5	17
1853	606	249	374	91	387	442	364	248	152	34	101	1008	53	2611	701	721	584	285	202	511	606	1028	136	223	1229	416	1237	651	230	-224	-162	539	242	367	-183	321	455	-259	1067	410	377	304	-248	84	811	612	102	660	281
1854	-5	132	95	250	44	-7	-55	-60	158	4	34	49	-29	51	99	43	34	196	240	59	150	28	122	104	106	279	173	0	60	87	94	201	-39	-85	-7	80	-201	67	173	198	82	-21	137	50	103	216	73	209	240
1855	69	387	350	749	406	126	310	385	421	172	303	246	388	557	407	166	237	233	253	497	660	11	248	304	376	661	265	281	701	30	541	666	831	234	144	83	751	-58	301	410	633	169	-45	321	419	308	304	809	199
1856	119	-77	-168	61	298	185	-11	415	103	36	48	-51	-218	126	190	69	64	-89	187	384	334	-31	6	193	-143	12	-88	181	158	-220	-656	-608	252	150	-70	46	-232	276	29	214	222	167	79	262	206	241	156	16	-116
1857	-35	375	-48	127	-184	-56	15	-171	90	61	37	76	58	196	111	16	98	60	402	42	26	78	161	-45	179	66	265	28	82	159	-10	227	120	91	-3	-55	476	343	53	8	-19	143	115	11	33	370	168	86	106
1858	18	-18	-22	99	76	33	-8	-221	38	-66	37	33	71	9	55	30	-1	31	105	-10	44	7	-15	-7	187	73	22	-15	-98	-3	105	-16	-34	29	0	-13	84	-192	106	-46	140	-4	-45	13	33	46	-91	123	79
1859	6	-8	55	-42	190	57	8	-80	-96	-60	34	-46	-5	-25	10	-7	-22	187	-30	7	79	-22	61	3	-35	-73	239	30	-93	-56	136	-89	-140	-23	-35	25	-190	301	56	92	-72	12	115	-71	44	-41	0	-61	-92
1860	195	345	228	99	266	252	93	46	621	129	452	440	15	403	256	126	171	173	260	105	195	567	472	183	354	79	242	107	-10	11	99	151	66	272	-19	226	179	0	165	337	-135	85	-27	157	187	494	85	-111	92
1861	119	320	31	-22	-57	664	-24	214	396	279	27	100	15	2476	222	-6	393	242	89	77	216	694	93	290	805	594	248	411	120	26	36	228	8	420	137	55	539	1383	848	-78	8691	233	74	181	86	664	714	599	-34
1862	115	-50	68	263	781	-288	381	473	368	78	271	193	-191	75	-136	113	175	-277	-297	377	257	134	268	-181	108	562	-537	114	268	-75	578	136	-17	31	168	-531	-624	-1123	82	-394	512	321	467	150	142	-70	226	699	113
1863	45	-107	59	-106	-374	-2	39	40	-41	-54	-42	54	29	70	6	-30	-9	-51	-21	-63	65	-34	6	-45	37	-47	0	71	-191	-227	-267	-128	-59	-91	43	-64	-476	-100	101	-81	-58	-17	-270	-22	26	194	-74	-153	34
1864	43	300	146	168	-6	60	177	617	-18	24	95	72	103	171	-10	-7	-10	60	117	222	133	61	-33	126	-57	2997	144	-20	153	170	483	120	154	57	-19	136	-148	184	-114	59	232	124	-22	77	-71	-13	-94	478	75
1865	219	-516	-82	-259	-305	-82	-204	-442	-243	-65	-205	-80	-290	-333	-123	23	-257	-25	-384	-218	-162	-175	-268	-146	-250	-483	-360	-122	-553	-334	-541	-847	-395	-165	-230	-73	-201	-234	-224	-106	-522	104	-738	-306	-185	-145	-120	-324	58
1866	-5	-46	-37	-164	-63	68	46	77	-33	-72	-6	-8	133	-120	-10	-13	10	51	5	3	-23	-14	-12	27	27	38	-19	-28	-38	216	-168	-57	59	-105	-27	-62	52	-150	-85	-43	-111	-102	-90	-66	-37	8	8	-30	-34
1867	1276	578	2120	530	3691	680	1089	6457	2154	656	735	1693	772	2586	203	616	2252	739	680	2097	503	1874	2809	225	1908	677	3310	2693	1501	1655	819	1830	1092	260	501	1194	656	2565	952	416	314	529	803	682	2120	11740	338	1629	838
1868	-100	-82	-35	1	-641	-92	64	124	-119	-64	-144	-73	-178	-229	-153	-9	-172	-222	-41	-116	-177	-62	-208	-318	-49	-654	-22	-206	-235	174	-457	-241	211	-130	-113	41	-307	-385	-258	10	-367	-49	31	-77	-132	-117	-32	-352	-13
1869	-1	-41	-4	3	69	-11	2	50	-49	-32	13	5	-90	66	45	-7	-55	493	1027	56	0	0	-66	15	-29	-127	-6	-28	-120	18	-173	196	465	-27	-27	-34	-190	486	-50	-2	48	40	-15	-16	-134	-20	34	33	-20
1870	156	98	135	123	438	49	11	261	218	83	16	239	-71	190	86	153	285	-132	186	112	334	192	222	-124	350	317	36	38	471	167	183	113	241	54	176	55	42	377	72	-59	-696	272	291	123	170	262	171	288	58
1871	202	533	170	375	546	178	244	382	528	126	193	232	423	393	259	121	286	326	523	243	461	207	252	255	449	610	537	219	679	406	966	373	300	191	172	288	709	662	154	204	401	394	474	248	312	450	116	848	109
1872	2092	12935	2014	1902	3698	1886	2310	5501	6864	3096	1578	6643	2565	12042	4798	1096	6296	3258	3439	5221	5680	8785	2953	2036	5971	7138	4521	3874	4269	1803	8297	6922	2568	2176	1510	1775	5441	9683	2631	2397	3753	1690	2907	1647	3615	8268	1795	5436	697
1873	526	40	-28	13	-95	-34	39	-197	194	-4	94	15	-109	220	82	138	126	262	217	56	-68	-17	-108	-302	-94	-117	-6	-135	-465	-277	352	287	56	-21	-62	-73	-190	-620	-74	70	9	21	2	27	177	156	11	92	-92
1874	25	31	157	9	-540	13	-139	161	206	18	-191	-25	133	222	150	55	142	132	211	63	192	12	-8	31	92	206	216	5	-350	155	-283	223	-178	196	-109	231	-677	-176	-165	-206	106	207	-63	394	219	276	-265	677	68
1875	349	-36	90	18	196	179	168	117	276	116	138	86	346	45	-5	103	395	37	99	331	124	-78	83	264	135	-50	111	58	306	-136	241	28	-11	126	90	97	137	586	112	144	9	38	110	72	97	873	-7	-36	-281
1876	-528	-824	-1091	-1925	-3799	-479	-916	-2472	-792	-211	-1132	-403	-503	-881	-574	-430	-1119	-320	-725	-803	-503	-348	-296	-409	-1282	-861	-926	-250	-3036	-1796	-2517	-1595	-655	-304	-900	-566	-5515	-3370	-1110	-944	-3347	-861	-1783	-888	-741	-1042	-1044	-2012	-1353
1877	97	26	-97	-5	196	-100	-57	70	113	16	37	98	-85	3	16	49	-66	-11	-27	151	148	325	-37	-191	157	-73	209	567	5	-292	189	86	86	151	125	87	391	326	80	168	-4	162	-126	20	59	461	179	257	168
1878	12	139	-13	-14	158	149	55	90	70	-2	39	104	26	147	30	-10	27	118	49	66	-26	192	40	65	258	6	108	63	-49	151	52	126	70	13	-39	4	-127	159	181	78	19	57	124	118	28	206	125	41	-44
1879	22	179	-306	-336	139	-24	-110	-489	81	26	-49	41	-2	50	82	-10	-111	75	89	84	79	75	-49	140	41	-152	130	-20	65	125	168	75	51	-81	-27	-41	52	92	40	19	-628	-44	79	-89	-78	176	49	190	-79
1880	170	2725	916	121	991	-111	110	-452	-31	80	-386	47	519	605	42	-96	-98	-150	60	1212	-5	225	161	221	13	88	-275	-201	-142	-296	-630	267	-346	-141	180	1204	-508	771	-66	179	-812	591	268	-13	398	31	347	-839	-137
1881	79	26	-33	100	88	66	2	26	107	-17	-5	95	71	248	159	98	65	40	67	105	88	217	88	112	198	28	134	0	115	83	-63	270	99	115	39	-122	-10	-41	-53	-87	-62	167	38	93	106	115	61	-72	51
1882	4024	1413	2877	2472	3348	1639	2191	5491	934	2463	3224	4801	415	6806	6221	843	1934	1935	56	4833	18963	9349	2305	2598	407	10959	4433	9514	2417	1792	10388	2816	1146	8485	1244	1139	1037	4225	3835	2500	6036	2146	4847	3712	4274	5482	5305	17791	340
1883	281	162	312	175	521	616	335	902	515	139	207	554	506	2958	351	244	500	742	380	662	743	568	405	318	937	467	929	587	515	440	683	738	332	456	15	298	751	511	776	356	1044	278	618	257	717	950	399	610	75
1884	-420	-368	-905	-467	-787	-121	-741	-1449	-257	-588	-1097	-61	-1126	482	-134	-160	-227	-248	-409	-440	-387	-81	-487	-808	-55	-1948	-104	-804	-1808	-1165	-2128	-495	-298	-133	-1150	-383	-1249	-620	-661	-506	-1151	-426	-1652	-1168	-56	-90	-1017	-1660	-1219
1885	327	-112	137	-493	266	201	-177	90	325	211	-30	295	-130	650	212	344	144	193	96	-31	168	80	-20	79	295	-355	0	81	-268	-125	42	204	66	264	-266	-180	1153	368	272	677	-251	72	-153	-113	215	300	-137	-523	3
1886	165	56	75	22	216	149	186	268	198	71	183	194	106	911	200	149	130	439	202	373	538	80	221	110	935	228	474	316	246	159	173	353	96	303	-19	78	148	125	520	108	870	175	230	49	393	316	105	484	-27
1887	30	-261	-257	-613	-349	-185	-157	-587	-187	-130	-577	-141	-479	-98	-122	-146	-206	-280	-116	-472	-88	-116	-371	-427	35	-775	-288	-626	-1178	-493	-331	-63	-204	-115	-101	-538	370	75	-90	-165	-324	-79	-1505	-443	-73	-192	-634	-218	-835
1888	207	92	157	85	266	126	122	308	215	0	56	260	7	611	224	118	241	421	359	45	109	48	133	-53	813	-98	212	242	98	-53	378	280	252	255	-62	101	201	293	250	217	357	64	182	18	232	373	134	-41	75
1889	73	-15	-75	13	-12	-30	-46	630	98	-136	-27	-60	154	86	17	18	118	-77	7	260	142	-17	-29	35	-143	130	186	102	224	91	-78	-362	-569	-23	-172	-106	-423	-75	200	100	154	-25	-6	6	63	-121	-38	-173	79
1890	57	-73	104	147	6	4	73	-26	27	9	18	-48	71	-48	87	-13	-17	98	49	102	148	45	32	102	82	12	16	63	-93	56	-84	-103	-49	-67	35	-27	21	176	56	-81	-53	-10	-60	-35	58	27	34	-142	10
1891	597	1765	774	241	-108	420	455	1502	1022	159	386	1668	407	2030	1344	255	973	1221	1290	1702	814	2408	814	419	2203	368	1787	1221	756	489	1607	1185	1004	992	285	563	-402	-620	1382	359	706	257	927	580	882	2830	601	1195	-144
1892	-125	8	133	0	-133	-53	-352	456	356	-69	-231	36	277	-105	277	9	61	329	132	588	-145	102	296	23	-11	235	-55	-130	465	672	888	-235	89	42	144	-182	-1185	318	416	-8	773	-107	214	-159	76	115	0	-674	865
1893	34	-315	15	61	-25	-59	-4	87	-24	-46	103	-18	95	-242	-66	-98	-98	-77	-113	56	124	-72	29	39	-254	333	13	25	-54	208	-73	-262	-113	-41	-39	-69	-455	435	141	92	-169	-57	-128	74	-63	-121	58	-8	-20
1894	-143	-598	-86	-392	-171	-102	-6	-429	-114	-115	-123	-124	-61	-401	-169	-12	-359	-187	-264	-324	-287	-224	-253	9	-346	-419	-163	-431	-422	-117	-283	-400	-211	-7	-281	-251	105	-310	48	-89	-507	-152	-149	-237	-339	-479	-210	-629	103
1895	131	135	31	186	177	118	102	265	65	26	84	63	157	-157	150	86	39	95	137	267	56	-20	81	67	110	60	186	12	482	-98	73	-132	105	161	0	108	815	394	200	103	324	107	76	155	303	173	65	313	44
1896	96	269	90	181	88	86	93	57	60	25	116	128	71	160	110	60	131	60	265	-38	68	52	97	213	317	289	114	122	142	224	367	239	347	22	82	43	232	620	170	24	430	34	121	101	127	155	29	251	96
1897	973	2961	605	706	997	798	985	986	4201	235	1242	2760	511	5579	2281	707	1195	1421	3612	528	1006	6208	519	379	1658	785	2092	1055	871	360	893	2726	1277	738	567	718	2053	1156	1190	1461	773	1056	887	577	1125	4120	377	1069	309
1898	-51	-209	-68	72	235	-71	-53	46	-136	-153	-153	-25	-69	-289	-68	-49	-82	-150	-121	-204	-50	-86	-143	-268	-63	-254	-183	-53	-317	-45	-157	-264	-78	-90	-101	55	-148	-410	32	-157	198	-194	176	-16	5	-147	-59	-44	-106
1899	179	288	195	614	209	76	295	432	380	34	204	206	237	479	146	312	169	219	329	423	518	349	444	154	380	425	284	370	559	436	252	404	140	327	242	78	592	612	192	391	425	85	31	240	325	268	240	422	17
1900	17	338	-221	56	698	-239	-122	83	177	23	-173	254	58	503	240	113	-148	228	231	123	819	147	-55	274	466	810	130	306	263	-315	0	462	644	190	125	-62	741	603	13	16	-130	325	-103	289	172	279	38	1212	54
1901	40	10	-6	229	101	-47	-15	-90	40	26	21	15	-34	33	34	16	7	40	48	-49	79	33	2	-152	49	54	101	48	109	-26	215	78	12	-29	19	23	-116	41	53	19	14	-66	38	20	13	24	-62	44	-30
1902	-31	-286	-128	226	-165	-17	-17	157	-40	-59	-26	-14	-31	-372	-84	-84	-87	-127	-106	-112	62	-230	-90	-88	-167	-168	6	-130	-164	148	-383	-295	-181	-25	-93	-55	222	-234	-37	95	53	6	149	40	-74	-67	19	-44	17
1903	574	995	561	289	749	449	357	234	948	357	470	1128	234	680	598	472	961	540	627	747	1036	1250	403	442	714	1245	782	592	805	398	352	841	168	484	195	316	751	628	691	364	343	477	460	468	503	1066	711	711	240
1904	51	-144	-11	-123	-101	14	-66	43	-208	-82	-76	23	-151	-681	4	-67	-106	153	208	77	-8	-137	-56	100	72	-54	58	-120	32	41	-78	-190	-387	-29	-39	-64	63	125	-157	0	9	-19	69	-45	-80	25	-10	-201	154
1905	46	-15	88	-183	222	131	-13	-80	114	41	92	131	7	-117	99	33	-53	103	106	345	213	-114	65	193	378	371	85	-12	268	-159	173	-107	-131	-29	39	50	518	544	-10	65	-43	57	370	27	132	144	-31	61	-68
1906	168	75	75	-228	57	137	239	87	243	-9	51	374	18	1948	394	209	90	447	245	715	1071	387	157	-53	705	266	998	853	767	-368	-26	19	14	393	172	154	1905	1131	1590	413	1378	456	1052	104	876	300	89	380	-79
1907	25	-227	-8	-155	-114	-81	-168	-191	-182	-45	-36	-65	-122	-75	29	70	487	43	49	77	-53	-83	-71	-53	-90	-247	-68	-53	98	-125	-294	0	-76	26	15	64	-222	8	-80	-239	62	-128	-675	-69	0	23	31	-30	-6
1908	101	730	219	207	546	143	144	462	616	178	281	340	231	848	321	138	389	811	673	592	639	324	352	243	785	489	589	393	833	186	714	769	410	202	187	316	1069	855	157	345	594	227	600	187	303	645	228	601	429
1909	173	289	139	-5	482	259	266	214	169	74	133	211	322	163	134	80	144	297	199	528	547	102	387	314	305	514	265	388	734	615	462	318	124	255	129	362	0	343	248	65	382	139	-15	67	282	262	325	576	316
1910	480	405	215	259	635	237	255	409	251	87	140	499	197	1614	251	67	260	164	293	927	402	563	478	344	366	257	527	500	619	227	819	428	482	302	172	152	868	1274	854	234	662	231	650	587	522	688	379	1030	147
1911	339	6	-53	-48	883	175	62	-3	244	116	69	181	-37	715	721	167	126	233	182	208	476	529	97	102	870	416	203	191	126	-94	52	263	181	224	109	62	-169	528	469	492	338	14	137	115	149	589	179	268	6
1912	165	355	186	42	584	115	144	295	172	81	66	166	61	307	188	152	141	239	552	-3	239	62	153	59	334	276	278	258	504	41	15	153	85	268	152	168	857	603	197	405	507	96	293	74	320	308	91	383	99
1913	131	-90	48	566	-184	-53	-48	-53	25	36	-142	351	2	78	-24	50	-44	138	-131	-3	-5	-85	20	85	76	31	36	-15	290	216	126	-64	48	99	70	85	465	712	72	46	319	-68	27	-182	46	56	155	-302	-85
1914	-47	-362	-108	-271	-254	-129	-55	-161	-176	-16	-127	-136	-90	-353	-185	-56	-96	-398	-270	-141	-44	-239	-171	-195	-147	-343	-173	-186	-71	-34	-604	-297	-178	-134	-70	-212	-677	-419	-208	-234	-483	-68	-277	-170	-177	-234	-108	-235	3
1915	-28	600	-97	-231	-76	-62	-4	204	81	-78	-120	-58	-386	412	128	-6	143	40	231	-56	150	95	-43	31	39	-63	111	-186	131	-368	52	15	325	-33	-15	50	-158	477	21	195	174	-66	65	-93	71	229	-62	-386	-96
1916	150	132	166	366	457	69	142	714	479	-11	279	298	167	1025	74	224	341	25	375	490	287	260	1411	-55	561	177	841	976	82	364	331	738	340	162	215	226	486	1006	301	359	304	175	514	172	472	3998	205	851	285
1917	120	40	90	-170	19	44	17	6	59	-68	17	189	-45	157	154	72	86	-40	-10	63	74	132	21	-45	175	-19	9	12	104	-163	-63	45	275	95	11	73	10	-117	122	2	145	38	33	-59	43	211	10	-232	-85
[truncated: 5,212 more rows]
[truncated: 11 more columns]
