# Supplementary material for: A Wrapper Feature Subset Selection Method Based on Randomized Search and Multilayer Structure
Source: Biomed Res Int. 2019 Nov 4;2019:9864213. doi: 10.1155/2019/9864213 (PMC6885241; doi:10.1155/2019/9864213)
Supplement: Supplementary Materials — Public datasets: details of five public datasets (had been described in Table 3 in the paper) which are the important datasets for classification with our methods and other comparative methods. Supplymentary Tables 1 and 2: description of two algorithms (LVW and Imp-LVW) which were compared with our method in Section 3.2. [file 9864213.f1.zip › 9864213.f1/public datasets/ColonCancer.csv]

id	1	1	1	1	1	1	1	1	1	1	1	1	1	1	1	1	1	1	1	1	1	1	1	1	1	1	1	1	1	1	1	1	1	1	1	1	1	1	1	1	2	2	2	2	2	2	2	2	2
1	8589.42	9164.25	3825.7	6246.45	3230.33	2510.32	7126.6	4028.71	9330.68	5271.52	14876.4	14173.1	4469.09	4985.22	4913.8	5627.25	7144.41	4865.22	5382.39	4412.48	7434.82	6995.41	4214.9	1914.68	8865.46	5934.89	5821.62	9767.03	13324.7	12977.7	8753.24	5012.02	6904.8	8347.98	5100.54	4554.58	5466.93	4201.51	3656.78	9128.12	3799.09	6194.24	11447.6	14641.9	9443.88	14368.3	6951.35	6302.78	6357.92
2	5468.24	6719.53	6970.36	7823.53	3694.45	1960.65	3779.07	3156.16	7017.23	4740.77	3201.9	8411.86	5167.06	4735.79	5215.05	3619.53	2071.4	3237.78	3848.44	1752.4	6471.21	6658.11	2213.36	2119.11	5447.19	3744.99	3748.25	9785.77	9505.03	7565.62	8978.13	1383.49	2260.78	9852.3	3343.32	3139.31	10152.3	2425.63	5082.86	5502.72	5665.78	5202	3529.13	3377.39	6671.78	3651.99	5565.78	4127.5	3736.85
3	4263.41	4883.45	5369.97	5955.84	3400.74	1566.32	3705.55	2870.26	4723.78	3318.51	2327.63	6042.84	4773.68	4075.12	4288.62	2606.5	1619.28	2341.09	3372.49	1280.32	5029.62	5316.4	1611.52	1595.41	4887.06	3528.83	3439.95	8605.04	7740.99	5735.2	7777.84	1269.65	1987	8178.97	2925.67	2958.4	7760.92	2228.82	4101.92	4590.13	5157.07	4079.63	2920.84	3048.43	6260.62	3302.93	4480.78	3635.7	2665.59
4	4064.94	3718.16	4705.65	3975.56	3463.59	3072.82	6594.51	4417.59	9491.53	6792.35	11248.7	8766.05	3330.36	2845.25	3213.43	2544.45	2576.16	2372.68	4444.57	5200.34	4749.33	4047.51	1764.23	1186.03	3782.59	2721.7	2502.97	4941.24	7982.81	6911.68	6202.5	3168.71	3439.41	4467.5	2914.19	1658.31	7258.25	1503.61	1365.7	3234.4	1359.79	3951.2	5445.86	5401.23	4905.71	5738.49	3667.65	2604.74	2493.88
5	1997.89	2015.22	1166.55	2002.61	2181.42	1810.2	2460.9	1854.11	5346.54	2632.89	5893.28	3511.08	3174.24	2973.28	3147.4	5967.09	3401.15	3058.27	2464.9	2369.06	1548.48	1656.01	4374.78	2090.39	3927.01	1556.62	1549.6	3581.6	2544.93	3095.93	4271.41	1945.49	2878.92	3388.45	1481.22	3196.53	1469.69	3804.53	1980.23	3978.55	1872.65	2382.22	2699.26	4734.3	3139.25	5115.91	4278.62	1796.43	1306.25
6	5282.32	5569.91	1572.17	2130.54	2922.78	1673.56	3775.68	2828.3	1557.14	5449.21	5319.86	4878.18	3643.69	4219.46	4460.45	7736.47	2915.09	1347.13	1304.56	2047.95	7000.13	6236.75	4520.79	1087.75	6138.97	3584.24	4155.71	7265.11	10163.3	8961.29	8248.88	2726.8	5887.21	5632.56	3697.95	2280.41	5695.65	3591.25	4883.89	7676.71	2218.1	1949.16	6637.81	5167.38	10926.2	4890.79	7568.93	2736.16	4092.72
7	2169.72	3849.06	1325.4	1531.14	2069.25	1290.42	2621.42	1427.53	1969.08	4623.21	9939.25	3391.88	3886.42	3556.88	2334.81	4633.86	3361.53	1306.57	1062.7	2104.76	3077.41	4130.04	3982.8	1248.16	4379.6	3484.49	3703.22	6498.42	9611.04	6641.8	5514.24	3300.59	3652.94	3754.51	2080.28	2132.31	4662.85	4028.59	2925.74	4644.39	1395.05	1909.1	4903.9	4434.33	7376.85	5008.33	6299.36	3648.1	3163.86
8	2773.42	2793.39	1472.26	1714.63	2948.57	2465.85	2047.28	3390.71	2295.4	3277.4	4058.64	2622.01	3922.92	3234.24	3302.76	1356.45	2888.06	3507.05	2903.32	2938.87	3440.91	3229.71	3466.29	1895.1	5385.03	1385.96	1300.38	3870.3	2346.16	2801.86	3681.18	1672.86	2524.5	4869.56	1638.05	3104.62	2949.18	2794.09	2061.41	2518.7	1683.78	3415.1	3411.6	4553.24	3245.25	5643.78	5174.09	2414.64	1077.62
9	7526.39	7017.73	3296.95	3869.78	3303.37	1675.54	6411.27	4373.04	6880.35	4488.06	14144.8	10012.8	2968.1	2824.78	3855.77	2982.88	6749.67	3917.27	4866.81	2628.59	5188.92	6939.09	2197.63	1179.93	5130.41	3634.38	4139.29	6936.54	8642.84	9363.43	7043.59	4185.62	4209.11	5019.05	3763.14	2958.99	6223.86	2683.03	1482.97	5460.94	2430.01	3965.97	2534.9	9515.12	6518.74	6013.95	4038.18	3182.26	3865.81
10	4607.68	4802.25	2786.58	4989.41	3109.41	1312.81	3857.12	3080.45	6162.89	3343.81	3282.62	6326.23	2832.22	3187.03	4319.03	6400.23	1652.3	1528.61	2734.14	1688.89	9008.61	4771.56	2560.5	974.815	5096.72	2386.01	3012.64	6769.04	8198.14	6413.16	12307.9	1025.33	1390.67	4843.68	3530.07	2121.4	4948.23	2892.45	3808.27	4251.53	4679.45	2857.64	4012.59	3925.47	5336.1	3837.77	4831.83	3196.14	1923.37
11	2598.06	1672.97	2441.42	1723.58	2724.27	2289.03	1496.41	5784.12	7927.65	3830.43	6707.68	4454.96	2936.33	3301.13	5199.19	5387.97	6094.99	1894.93	2940.96	2776.23	2260.79	2329.94	7473.64	1179.73	4491.18	1387.19	967.785	4984.22	3186.3	2683.17	8021.14	2801.9	3783.53	6404.31	2530.78	2446.04	2939.05	2983.8	2126.07	2962.72	2369.64	2798.16	1989.59	4445.77	3932.21	5468.16	7351.67	1735.08	1210.82
12	1522.65	1792.18	1487.67	1298.72	2557.78	2162.29	1604.26	2222.21	2022.67	3046.95	3870.91	2341.64	2590.71	2130.01	2579.71	1088.86	2678.04	3095.5	2707.53	2877.69	1934.13	1875.17	2683.66	1632.91	4066.33	1172.82	962.562	3014.07	2319.65	2520.99	2890.69	1604.95	2129.93	3721.81	1287.13	2522.79	2851.56	2302.55	1412.59	1894.28	1440.55	2678.87	2413.09	3337.27	2551.85	4009.48	3543.98	1866.57	989.275
13	1300.6	3792.54	1315.85	1309.35	3164.7	2070.08	1489.91	2502.81	1427.51	8878.31	7921.85	4825.53	2639.31	2352.12	1943.83	1894.87	1550.43	2565.13	1290.58	4531.55	2410.13	5504.68	2592.51	2390.1	2343.08	2211.9	2605.37	3380.85	5880.63	4964.49	3754.67	3529.47	2038.07	3919.86	1569.99	1500.45	4113.71	1964.47	2692.58	2140.47	1016.89	2393.44	5328.29	4777.87	7450.42	3601.69	6017.5	6146.02	2881.6
14	1181.63	3630.38	855.455	1789.67	2285.31	3466.79	1364.17	3616.25	3334.28	5729.32	3648.43	6074.59	2609.57	3216.15	2555.94	2464.19	1290.42	2445.21	2166.39	5161.14	1356.32	2411.46	2543.7	1421.72	3915.72	1128.49	1181.29	3193.87	2399.06	2664.59	3593.97	2190.55	2917.37	3550.69	1593.46	2332.24	1333.77	2490.74	3547.26	2582.01	1842.42	4583.19	7127.01	5455.74	4986.59	6879.56	5247.57	4707.59	2263.24
15	2417.96	1906.21	802.305	1587.79	2576.75	2137.42	2093.5	1673.23	5329.66	2763.32	5570.31	3723.88	2711.75	2676.37	3371.3	3904.84	4205.42	1834.09	3096	2910.64	1931.62	1821.23	5571.28	1243.75	6517.92	1528.4	1728.37	4816.36	3481.25	4316.3	4053.89	2099.79	3900.64	4788.1	1925.35	3030.45	2712.97	3483.6	2164.84	4021.48	1772.26	2665.51	3681.71	5455.89	3753.82	6581.26	6136.1	2050.56	1327.66
16	3139.4	5745.4	3251.11	3496.15	3056.72	2716.38	3048.08	4623.08	1547.22	5865.66	8512.03	3353.47	3462.9	4670.9	4847.66	2767.3	1872	4361.5	2177.31	4113.71	5822.57	8844.99	3060.57	758.529	6189.93	2448.76	2961.73	5862.69	8076.12	7631.15	4819.01	2796.75	3104.81	4712.15	2389.99	2043.37	5104.26	2124.08	4331.97	3437.2	1588.39	4444.96	7727.61	7722.43	10694.5	6469.81	8252.91	6173.1	3513.73
17	2473.26	1919.45	781.995	1226.3	1391.59	1497.16	1324.54	1871.76	4694.58	1828.07	4844.52	2760.96	1939.07	2462.97	2619.61	1470.15	1598.1	1362.39	2845.1	1957.6	2949.21	2078.15	3213.7	745.535	3477.27	1528.41	882.879	3756.56	3513.21	2461.07	3890.42	2170.44	2861.24	3533.09	2823.5	3639.82	1545.44	3914.91	2752.6	3441.9	1474.13	2180.68	4888.73	4298.31	4003.86	6988.94	6756.02	2143.07	1749.16
18	1306.9	2036.28	1618.65	1597.28	2162.55	1586.24	1452.92	3154.83	2193.69	3078.74	4143.38	2863.18	1567.7	2266.1	2329.35	2091.58	1534.76	2974.74	2461.66	3553.49	2181.63	1802.48	2580.69	1246.65	2748.2	818.436	736.874	2328.3	1487.41	2015.66	3816.63	1518.92	1762.46	3442.74	2238.23	2764.99	1365.29	1939.46	1790.98	1640.21	1144.1	2226.15	3489.36	4680.41	3372.57	4277.2	4069.59	2272.51	960.126
19	1285.6	2253.36	1066.84	1144.69	1540.25	962.01	2003.48	1624.41	1077.54	3741.37	7256.52	3036.59	2602.1	2339.85	1918.64	1705.14	1366.43	810.264	863.07	1511.08	2160.37	3548.08	3579.37	716.774	3189.67	2111.7	3053.8	4156.9	7498.05	6516.7	4531.93	2073.38	2882.18	2509.01	1700.22	1795.63	2410.92	2569.26	2288.47	3898.92	846.751	1019.75	3170.38	3653.16	5071.68	2821.6	3938.16	2366.81	1644.8
20	1900.36	2490.87	1006.21	1139.63	2705.68	1214.77	2217.34	1150.89	1433.41	4443.52	7761.74	3695.51	2780.76	2393.46	2737.71	3567.93	2008.37	672.956	1591.68	1969.88	2567.92	3175.96	3919.05	837.87	3861.86	2984	2884.72	5241.45	9255.16	7140.73	4865.51	2529.55	2803.18	2513.43	1564.83	1416.77	4948.56	2593.31	2944.07	3779.07	1044.32	1372.08	3407.75	3950.31	5406.78	3470.41	4974.41	2444.83	1823.79
21	3504.21	3759.59	1436.79	2662.1	1271.72	904.722	3247.14	1309.18	4611.56	2707.76	6512.11	6745.51	1501.78	2184.64	3121.47	3904.44	4427.29	1986.42	2331.82	1581	4051.45	2897.2	2570.77	666.181	2850.86	2123.02	2462.71	4045.14	5071.75	4702.68	3191.25	2422.55	3209.88	2343.19	2825.64	1485.03	3262.91	1469.83	1975.35	4078.85	1344.13	2317.05	5822.4	8706.22	6202.29	6012.3	3151.02	2238.89	2738.62
22	2428.05	4268.92	658.879	2636.16	4439.89	3970.42	3275.57	3015.64	9533.93	5904.6	6518.91	4152.65	4141.86	3253.18	5193.06	4877.54	3755.12	4710.41	4360.75	5303.44	4084.87	3519.01	12112.1	2126.8	7337.06	2777.79	2727.27	4489.47	4162.45	5775.17	4477.07	4508.93	5590.98	5853.31	2619.15	5121.1	3577.66	4567.06	3790.35	3986.65	3181.01	5046.61	6087.9	9993.69	4944.29	8254.45	9734.15	4139.66	2311.44
23	5150.01	4166.19	1924.79	3134.75	2030.67	906.596	3186.06	1206.19	4302.45	1806.14	10051.4	6646.43	2104.18	2698.24	3024.97	3845.14	5326.99	1626.07	3104.56	1520.68	3027.85	3079.83	1402.37	607.091	4213.01	2933.17	2861.2	5136.65	6341.94	7703.09	4033.65	2730.75	3249.6	2697.57	2374.9	1897.82	3712.26	2568.21	1720.76	5709.85	1673.03	2116.54	5796.38	9131.43	5458.39	8120.47	5191.43	2323.99	2837.32
24	3855.84	4286.69	2080.66	4244.07	2249.82	1313.06	1905.64	1640.32	10721.3	3337.1	1828.72	5772.71	2680.48	2001.15	3013.6	4059.92	1168.4	1367.63	1928.42	1185.38	6200.68	3918.68	1337.99	606.789	3309.36	3795.67	2771.11	6243.25	9146.95	2622.02	6940.84	1424.86	1454.04	5251.4	3848.03	1682.68	3298.35	2139.98	2484.21	2694.95	3628.91	2292.42	3187.56	2194.06	5923.93	3694.63	5199.35	3918.99	1547.65
25	1806.47	2699.28	1155.94	1186.89	2150.12	1950.39	1557.74	2641.15	2199.54	2910.13	3104.81	2065.13	3317.61	2619.02	2617.12	982.109	2266.85	2500.33	2134.57	2387.08	2644.18	2391.07	2630.91	1603.72	3709.19	1056.56	1037.14	2547.06	1640.98	2183.93	2689.98	1478.68	1880.71	3390.91	1212.97	2135.31	2094.34	2052.12	1139.04	1791.15	1219.4	2495.17	1911.9	3370.55	1994.75	4202.46	3514.97	1657.35	601.55
26	3192.41	2796.08	1444.1	2342.38	3350.5	1788.15	3116.2	1752.55	6264.49	1769.33	9309.4	3548.4	4384.37	3524.44	6432.07	6187.47	5521.62	1030.18	4610.96	1812.97	3263.12	2041.33	5261.34	590.352	9026.38	2461.89	2444.14	8041.3	5440.05	6794.7	6356.96	3309.41	5881.08	5626.59	3247.46	5217.5	4268.07	6775.8	2527.88	6483.6	3229.72	2633.58	4436.53	6788.57	4830.35	11454.7	6789.4	2073.55	1752.41
27	872.014	1015.91	853.443	792.214	1563.99	1254.52	925.72	1531.53	1278.03	1837.28	2472.23	1533.8	1312.09	1065.08	1626.29	715.573	1082.65	1355.27	1556.65	1539.5	965.754	949.276	1441.91	919.464	2402.93	743.063	569.737	1772.59	997.345	1437.92	1818.46	972.995	1252.46	2319.15	804.648	1594.76	1548.45	1450.15	846.41	1189.78	868.819	1571.61	1202.57	2172.24	1223.92	2714.63	2365.9	956.667	621.605
28	1135.82	1459.1	734.529	1133.24	1903.58	1639.15	1644.28	2560.44	3597.07	2578.58	4906.44	3030.32	2294.89	1670.93	2683.26	1873.19	2262.19	1233.64	2160.2	2108.41	1815.53	1294.06	2324.09	568.015	2943.06	1374.82	1055.29	2913.72	2514.4	3173.87	3226.66	1924.86	3319.13	3504.19	1730.53	3139.62	1522.13	3892.94	1948.64	2726.34	1574.1	2883.85	3687.38	4783.52	4043.17	6801.94	5809.54	2712.73	1293.4
29	2365.24	2865.04	763.308	969.824	1568.11	819.189	1902.57	1293.78	719.148	2949.16	2687.17	2410.86	1978.4	2221.07	1829.98	4691.35	1413.12	589.599	594.064	989.5	3306.34	2887.52	2378.65	566.867	3056.97	2015.93	2431.39	4126.53	5734.56	5205.31	4336.71	1393.29	2976.26	2919.82	1801.96	1255.24	3055.84	2045.01	2547.35	3651.99	980.919	966.055	3281.8	2549.12	5983.46	2321.06	3799.44	1308.54	1975.86
30	1567.24	1156.96	704.117	835.386	1368.82	1454.76	2218.74	3926.42	3316	2830.05	1834.18	2369.63	1322	1343.97	3971.84	777.33	1591.45	2126.64	3637.55	2369.39	2487.8	1669.04	3264.07	561.336	2137.43	1644.99	666.59	2104.58	3182.18	1557.61	2600.59	1701.65	1894.7	3241.54	2032.96	2134.5	1267.5	1759.69	2726.31	1490.74	1556.19	2171.2	6215.13	4988.23	2915.47	4907.09	4098.03	3633.08	1274.58
31	1643.56	1351.96	591.809	1392.72	2648.27	1227.42	2194.07	1013.62	4410.26	2092.2	6470.86	2782.46	2243.12	1968.23	3146.76	3494.7	2849.12	1150.12	3175.82	1531.35	1402.82	1300.36	4601.68	538.69	4989.44	1588.81	1440.68	4498.68	2857.98	4260.63	2775.85	1756.57	3464.52	2834.36	1745.72	3098.43	2660.84	4448.23	1408.22	3520.17	1346.31	1299.71	3214.01	6446.7	2618.81	6563.62	8193.99	1190.32	849.095
32	1582.04	3218.32	807.394	3034.57	1073.41	916.712	1298.09	786.101	3309.94	2423.37	1135.63	2905.37	1173.63	1912.94	2443.98	1716.65	870.004	1397.42	1367.58	971.916	2938.28	3128.27	1157.45	524.087	2015	1367.61	1146.46	2059.73	3425.46	1866.77	3636.58	812.376	781.055	1346.93	1879.32	526.396	1573.75	720.531	2547.33	1932.92	1485.52	2069.18	3036.16	1604.93	4026.88	1994.45	2092.25	2852.43	1472.84
33	2854.99	3855.53	2138.87	4699.4	1207.42	576.784	2604.64	1077.69	6966.78	1488.02	2039.56	5638.22	3065.01	2698.36	3092.67	8418.05	1740.23	807.14	2124.6	511.859	3335.41	2639.21	1069.24	502.191	3436.8	3590.09	2962.85	6723.97	7713.3	3387.39	5392.2	843.626	1653.23	3727.82	2278	2143.36	2897.56	2138.59	1945.9	3366.13	2753.63	1314.67	2850.95	3987.23	5379.88	3666.93	3630.66	2861.68	1588.71
34	2513.34	3097.45	1734.12	3312.48	1201.77	745.34	1743.82	1956.64	3493.02	1670.86	484.697	2167.53	1898.87	2129.71	1965.46	1875.94	832.811	1241.85	1565.16	908.227	1152.46	3132.34	803.568	473.665	2354.69	1840.13	1904.27	3895.17	4246.7	3372.75	3674.73	589.58	750.811	2916.38	1659	1058.36	2544.14	1027.29	1942.58	1601.04	1464.52	1749.36	2115.14	1874.36	2946.43	1996.38	2888.33	2720.42	1012.32
35	930.071	1667.54	905.62	854.429	1733.82	994.612	1068.42	987.244	478.959	2562.08	2381.25	1431.35	1758.87	1312.33	993.739	552.009	1453.66	1742.77	867.727	1398.58	1808.2	2823	1802.66	1285.64	1897.48	1058.5	1111.72	2526.59	2513.99	2491.53	2028.66	1144.4	1127.33	2187.28	736.67	802.01	2418.11	979.452	1015.11	1063.82	655.935	1354.1	667.64	986.266	1116.63	1404.37	1582.86	1464.2	827.716
36	3166.58	2779.3	1378.12	1880.54	621.65	540.469	1901.38	749.75	2721.45	998.769	5213.79	4142.28	842.921	1673.95	1782.71	2936.06	3119.15	1409.38	935.8	730.46	2719.94	2299.97	1430.48	460.319	2500.82	1716.11	1802.73	2912.87	5319.19	4799.76	3518.41	1661.22	2359.97	1658.42	2132.25	1265.52	2009	1604.06	1381.64	3790.59	995.7	1459.83	4164.1	5684.59	3917.55	4449.02	2216.54	1548.32	2050.52
37	930.304	1064.27	797.193	1329.32	1381.48	1236.08	1749.79	1259.82	3580.59	2256.71	5492.27	2775.68	1458.19	1421.72	3158.83	4327.88	2074.62	797.04	1437.3	1379.74	1397.31	1059.93	2962.73	439.676	3377.24	1075.08	1233.97	3553.16	2139.62	2705.18	2580.68	1656.31	4568.8	2970.57	1271.85	2144.13	1230.35	3603.47	1177.55	2435.16	1432.16	1644.49	2589.82	4361.18	2681.42	4555.53	5038.42	1220.06	972.24
38	2018.36	2430.88	1880.19	3124.25	719.452	422.656	1746.84	1215.65	2497.81	807.95	762.156	2442.46	1752.23	2080.26	1609.35	2256.55	1310.95	1026.97	1189.43	454.137	2135.76	2443.27	787.405	471.766	2424.28	1230.51	1372.88	4111.7	3503.86	2203.45	3232.3	596.077	982.261	2360.43	1394.87	868.525	2487.66	956.835	1239.26	1590.3	803.031	990.69	1543.84	1633.78	2475.93	1442.28	1624.57	1470.05	621.03
39	2065.59	2814.28	1389.63	2456.09	967.358	1374.16	1033.71	2276.83	1448.59	2444.33	2233.48	4129.16	1454.1	2219.27	2571.5	408.692	1024.9	972.406	1027.93	1521.81	2035.65	3483.97	424.561	448.846	1409.85	1453.68	1602.74	1959.45	3553.73	2599.32	4587.99	2019.24	1589.64	2088.49	2617.14	1290.42	895.683	1483.62	2530.07	1755.12	1247.76	3323.29	5961.37	3680.63	6961.13	3773.5	3165.12	4547.8	2522.65
40	2065.59	2814.28	1389.63	2456.09	967.358	1374.16	1033.71	2276.83	1448.59	2444.33	2233.48	4129.16	1454.1	2219.27	2571.5	408.692	1024.9	972.406	1027.93	1521.81	2035.65	3483.97	424.561	448.846	1409.85	1453.68	1602.74	1959.45	3553.73	2599.32	4587.99	2019.24	1589.64	2088.49	2617.14	1290.42	895.683	1483.62	2530.07	1755.12	1247.76	3323.29	5961.37	3680.63	6961.13	3773.5	3165.12	4547.8	2522.65
41	2065.59	2814.28	1389.63	2456.09	967.358	1374.16	1033.71	2276.83	1448.59	2444.33	2233.48	4129.16	1454.1	2219.27	2571.5	408.692	1024.9	972.406	1027.93	1521.81	2035.65	3483.97	424.561	448.846	1409.85	1453.68	1602.74	1959.45	3553.73	2599.32	4587.99	2019.24	1589.64	2088.49	2617.14	1290.42	895.683	1483.62	2530.07	1755.12	1247.76	3323.29	5961.37	3680.63	6961.13	3773.5	3165.12	4547.8	2522.65
42	2065.59	2814.28	1389.63	2456.09	967.358	1374.16	1033.71	2276.83	1448.59	2444.33	2233.48	4129.16	1454.1	2219.27	2571.5	408.692	1024.9	972.406	1027.93	1521.81	2035.65	3483.97	424.561	448.846	1409.85	1453.68	1602.74	1959.45	3553.73	2599.32	4587.99	2019.24	1589.64	2088.49	2617.14	1290.42	895.683	1483.62	2530.07	1755.12	1247.76	3323.29	5961.37	3680.63	6961.13	3773.5	3165.12	4547.8	2522.65
43	1926.4	1288.31	535.726	901.29	2451.59	1022.65	1501.82	884.362	4384.52	1562.02	4247.44	2225.32	2102.44	1616.48	2794.05	2218.7	2971.91	907.536	2511.71	1716.89	1852	1205.31	2533.35	406.985	4142.17	1091.47	1259.39	3385.69	2072.05	2982.97	2623.6	1553.87	2786.04	2652.54	1084.74	2960.75	1516.31	3913.61	1203.14	3106.79	1289.01	1406.2	2572.1	4697.84	2285.45	5745.85	5114.18	933.128	860.697
44	2701.36	4866.31	2106.66	4344.31	1477.37	1754.69	1989.63	2627.19	3108.39	3374.02	1665.71	5704.94	2166.47	2420.88	3223.69	2250.54	834.819	1193.32	2055.25	1166.36	3137.06	3628.53	913.031	397.822	2515.73	2618.74	1924.05	5027.25	5837.45	3480.28	6280.04	1037.49	1323.76	3150.99	3137.31	1703.71	3432.02	1668.81	2366.42	2331.21	2670.6	3848	4713.41	3154.81	5564.32	3335.7	3227.04	5437.21	1144.62
45	1327.69	1631.16	660.355	762.087	1131.96	956.552	985.752	830.747	847.205	2123.71	2748.62	1784.56	895.489	786.591	1615.99	547.188	481.692	395.98	536.881	1160.88	1800.58	2316.39	1176.64	429.58	1048	871.466	857.68	1447.9	2478.96	2072.64	1925.28	907.877	1066.68	1383.59	721.878	717.264	1394.85	645.942	1530.52	1426.19	672.3	1593.83	2172.55	1662.11	2831.3	2534.55	2163.55	2166.26	2025.91
46	2523.03	2609.95	1327.91	2171.24	643.602	602.056	2318.41	872.394	3871.45	1395.88	6315.04	4437.58	1646.41	1344.44	1804.35	2437.83	3102.58	1049.05	1301.25	818.934	2332.14	2079.72	948.9	387.956	2076.65	1646.13	1788.52	2909.79	3876.66	4759.17	2683.13	1671.95	2629.63	2280.88	1957.65	1246.02	2604.19	1074.1	954.558	3111.31	1171.78	1011.01	2179.47	3893.1	3017.74	1577.13	2005.95	1461.07	1598.97
47	1703.06	1573.87	685.004	1425.29	1900.93	1497.59	1794.55	1353.59	6000.08	1910.43	7741.6	2631.55	2661.97	2337.79	4018.86	4392.11	2649	897.969	2854.6	1694.26	2246.54	1447.8	5056.56	385.93	4213.57	1518.75	1240.73	4200.56	3353.1	3284.7	3684.28	1596.45	2553.05	3921.9	1418.52	3019.91	2167.45	4539.73	1627.47	4464.61	1266.85	1918.93	1411.99	4927.28	2537.58	6201.25	5131.61	804.079	795.691
48	832.67	1795.66	452.587	582.195	970.876	664.013	684.38	1253.8	685.117	3187.66	2626.95	1308.69	1061.12	1135	1071.23	597.928	397.026	794.153	408.74	1380.63	1251.22	2742.84	756.795	377.23	1172.35	1441.88	1436.03	2004.41	4071.38	3394.27	2178.14	1406.75	1074.66	1762.91	1427.76	894.431	1560.13	1188.82	1372.59	870.539	499.984	1464.4	1899.06	2152.44	4689.5	1839.17	1916.45	3021.2	1132.9
49	1183.48	3155.34	1380.55	1969.88	1314.31	1030.57	1206.22	1140.95	3611.2	1841.16	1291.85	2833.22	1494.72	1577.78	1804.55	2269.21	463.419	849.35	1072.29	1126.32	1177.43	1992.28	1146.47	533.645	1371.01	740.894	776.564	1134.76	1829.19	1744.61	1964.1	374.767	485.919	1061.21	1233.07	521.675	1657.69	429.471	1531.12	1015.45	1380.42	1694.96	2744.78	1828.74	2397.34	1350.39	1899.2	1995.48	1172.23
50	2344.61	1559.28	1109.33	1651.35	1293.48	729.784	1715.91	1981.64	1787.6	1475.99	3112.67	2374.87	1488.15	1412.98	2259.99	1721.37	1324.13	904.223	1169.26	1163.82	4623.97	2057.2	1070.49	369.994	2648.96	1322.6	1720.47	3060.96	3908.19	5128.27	6517.82	1245.92	1694.05	2736.74	1826.82	1936.35	1386.53	2740.87	1538.59	2175.11	1514.94	1326.22	2924.74	3455.95	3384.01	3830.9	3713.18	1690.27	1194.06
51	2344.61	1559.28	1109.33	1651.35	1293.48	729.784	1715.91	1981.64	1787.6	1475.99	3112.67	2374.87	1488.15	1412.98	2259.99	1721.37	1324.13	904.223	1169.26	1163.82	4623.97	2057.2	1070.49	369.994	2648.96	1322.6	1720.47	3060.96	3908.19	5128.27	6517.82	1245.92	1694.05	2736.74	1826.82	1936.35	1386.53	2740.87	1538.59	2175.11	1514.94	1326.22	2924.74	3455.95	3384.01	3830.9	3713.18	1690.27	1194.06
52	2344.61	1559.28	1109.33	1651.35	1293.48	729.784	1715.91	1981.64	1787.6	1475.99	3112.67	2374.87	1488.15	1412.98	2259.99	1721.37	1324.13	904.223	1169.26	1163.82	4623.97	2057.2	1070.49	369.994	2648.96	1322.6	1720.47	3060.96	3908.19	5128.27	6517.82	1245.92	1694.05	2736.74	1826.82	1936.35	1386.53	2740.87	1538.59	2175.11	1514.94	1326.22	2924.74	3455.95	3384.01	3830.9	3713.18	1690.27	1194.06
53	2344.61	1559.28	1109.33	1651.35	1293.48	729.784	1715.91	1981.64	1787.6	1475.99	3112.67	2374.87	1488.15	1412.98	2259.99	1721.37	1324.13	904.223	1169.26	1163.82	4623.97	2057.2	1070.49	369.994	2648.96	1322.6	1720.47	3060.96	3908.19	5128.27	6517.82	1245.92	1694.05	2736.74	1826.82	1936.35	1386.53	2740.87	1538.59	2175.11	1514.94	1326.22	2924.74	3455.95	3384.01	3830.9	3713.18	1690.27	1194.06
54	845.023	1166.2	469.975	505.058	1632.69	487.379	1180.4	507.473	590.94	1999.36	5614.71	1478.63	1022.28	1085.36	1114.03	1591.2	659.485	409.249	635.211	953.705	1129.73	1468.4	1568.39	363.954	2308.79	1189.85	1651.37	3057.28	4387.93	3447.34	2626.13	1082.02	1533.39	2015.85	1130.91	956.791	2602.47	1496.94	1248.87	2080.28	673.114	657.602	1987.31	2329.13	3403.02	2024.21	2816.54	1197.73	1023.21
55	1528.79	2893.84	933.438	2144.33	814.496	690.249	1576.3	954.833	2186.52	1339.4	695.854	2868.91	1040.27	1621.58	3234.64	2668.32	571.6	706.195	801.977	603.901	4007.31	2715.96	1095.02	351.669	2563.09	1376.9	1381.11	2575.51	3328.63	2672.45	6091.03	892.308	632.039	2167.07	1956.83	839.676	1243.74	964.519	2334.48	1197.98	2182.22	1837.91	3287.48	1931.5	4648.51	1628.34	3076.91	2593.86	1067.39
56	1185.71	2249.17	349.669	986.544	1491.3	1371.12	1135.04	2291.99	2093.83	2004.08	1804.52	2187.88	1594.44	1768.87	2308.97	1381.74	851.649	1141.33	1386.26	1859.95	1369.22	1779.18	2259.47	369.99	3283.22	928.225	984.197	2056.54	1488.67	2709.22	2254.49	1504.68	2101.16	1830.88	1520.66	3016.15	473.404	1572.3	1959.82	1752.59	1261.34	2548.96	3697.66	2658.5	3244.33	3990.19	2438.15	2741.28	1150.21
57	728.459	1451.45	725.454	1225.8	1247.14	1052.13	1612.27	1167.77	2055.88	1827.01	1878.34	1454.84	1291.01	740.96	1999.28	865.778	1394.29	1204.44	1622.23	1370.12	1877.58	1251.83	2513.35	348.137	2780.31	712.214	1020.43	1410.27	2301.61	2719.56	3799.31	2474.58	2503.62	2546.44	1299.33	2497.03	1433.71	2049.03	1317.26	1395.48	962.923	2135.57	3058.46	3774.75	2548.08	3782.95	3877.18	2528.48	955.28
58	1148.16	2004.15	631.537	676.174	1032.97	611.111	1344.39	818.458	1131.23	2333.57	4336.29	1842.85	2053.3	1893.78	1319.97	2386.82	1180.99	543.193	753.462	895.42	1786.29	2545.73	1441.04	332.867	2190.34	1498.12	1664.65	2629.16	5477.08	3837.68	2659.84	1616.31	1688	2326.67	1077.93	970.739	2988.96	1146.54	1560.04	2485.21	780.449	945.117	2674.27	3241.72	4601.42	2131.19	3683.42	1799.69	1682.53
59	3684.62	3002.4	565.65	1092.15	399.983	500.475	372.375	914.487	1335.97	989.729	1259.34	2823.1	996.3	872.462	1261.31	2154.78	543.579	613.217	633.688	463.058	873.608	2566.49	426.863	320.842	670.917	657.775	797.154	2599.07	3697.24	630.871	2709.53	687.013	785.017	1664.55	1875.02	461.004	1931.38	349.558	2966.2	1581.67	3043.04	2445.63	3096.95	823.237	4706.9	1147.15	2138.67	4271.03	1821.59
60	1397.46	1700.52	660.246	1050.19	1421.37	963.024	1148.47	1252.69	5055.4	1570.57	3929.59	2400.62	1359.68	1713.86	3185.1	2888.8	1788.67	544.126	2011.91	1011.27	1824.37	1249.74	3193.74	314.048	3230.39	1030.25	844.66	3314.42	2286.61	2926.49	3208.44	1139.78	2187.32	3134.84	1464.52	2411.28	1456.74	2639.8	1309.94	2183.83	925.094	1364.68	2367.28	4121.07	2585.83	3456.13	4107.25	1012.88	816.489
61	849.185	850.115	349.898	498.437	961.885	1154.53	616.767	862.621	2015.39	1813.22	1898.4	1023.16	1137.16	810.95	1402.04	750.023	726.663	538.094	1140.14	1408.89	880.71	1176.44	831.446	312.45	1601.22	439.929	543.433	1223.78	978.438	1119.09	1622.29	928.227	806.592	1186.33	784.729	797.908	832.398	938.071	1003.99	953.879	442.323	1543.63	1857.6	1827.59	1862.57	2434.03	1791.69	1207.31	850.429
62	983.471	1210.17	367.668	764.074	2767.01	800.788	1518.11	999.225	3089.9	1189.07	3256.8	1536.61	2629.92	933.982	2083.64	2322.42	1174.74	641.12	2041.1	945.128	1175.59	993.712	2493.08	311.908	3285.78	1170.35	986.673	3195.27	1880.73	2553.52	2301.29	995.087	2052.01	2891.55	1012.13	3071.88	1768.16	3034.26	959.563	2196.71	1014.19	1260.63	1828.06	4975.68	1774.2	5596.96	4749.6	1144.1	675.866
63	1538.3	1762.17	952.622	1363.21	452.068	391.215	1427.21	743.477	1703.72	1215.54	5161.84	3619.12	897.258	1114.79	1407.05	1636.16	1939.19	975.663	689.314	703.071	1986.84	1479.24	783.462	311.77	1311.92	1031.67	1250.4	1946.73	3136.96	2911.17	1985.4	1211.83	1867.92	1171.18	1275.52	879.524	1210.22	1054.25	924.451	2122.28	726.712	1369.4	3361.33	4366.37	3078.35	3483.24	2304.49	1648.86	1343.34
64	661.449	1395.25	472.96	493.534	843.211	298.135	734.074	374.986	691.551	1543.4	2928.78	950.67	1657.25	878.735	951.075	760.279	868.943	537.171	355.635	663.81	1436.24	1870.49	1025.43	363.854	1477.98	1302.84	1355.23	1872.09	3503.3	2976	1625.28	1366.18	1055.04	1651.02	802.754	1196.31	1597.88	1798.24	772.41	1129.29	396.43	834.05	2066.1	1682.45	2932.36	2128.07	2815.51	1784.26	948.477
65	1993.45	2465.44	844.168	1545.87	1132.54	677.255	2011.85	2077.2	3837.97	2288.17	4203.33	4147.8	829.444	908.665	1785.16	576.419	1034.78	1772.31	1783.46	1009.99	3022.7	1871	1298.95	294.465	2046.88	2299.07	1418.01	2921.27	4758.48	3290.31	2733.49	1882	1986.88	2149.31	2039.29	1090.21	2502.97	873.979	954.871	1325.45	1938.3	2510.8	4715.9	3860.25	3846.84	4023.3	2585.7	2525.62	1572.1
66	976.266	1933.59	415.311	438.516	817.341	1815.52	737.707	1074.21	778.605	2492.1	873.449	1724.64	1214.46	2097.75	1924.89	2605.19	571.95	2336.16	474.035	2541.84	606.591	1500.98	672.459	923.944	729.874	287.57	651.025	865.766	995.197	1075.92	1533.31	762.148	687.626	938.141	596.253	1004.1	571.423	716.155	2052.91	970.674	479.551	2109.36	2934.91	1657.72	2585.45	1852.55	1264.38	2485.65	1667.33
67	892.731	1671.58	283.301	516.01	805.653	683.025	472.974	1294.21	544.759	2979.39	607.699	1182.87	809.306	1301.99	908.237	556.933	677.195	1049.76	648.602	1498.59	690.399	3266.58	974.278	463.26	1025.64	648.193	787.291	1593.05	2970.41	1348.74	1524.72	1044.48	622.982	616.706	957.67	405.47	913.419	345.842	2104.98	1606.7	419.4	1187.48	2976.53	1474.93	4074.43	1043.92	1704.41	1836.15	1811.18
68	625.874	1418.91	280.167	485.602	901.438	441.061	720.832	441.323	571.012	1617.64	3039.64	1180.66	1427.75	833.244	783.29	1194.9	494.743	569.204	538.704	826.825	534.49	1882.53	1011.9	382.338	1506.92	1046.8	1306.64	2057.98	3298.76	2346.87	1423.85	955.337	847.23	1227.02	460.794	775.123	1990.73	1204.48	1004.15	1655.43	308.069	610.818	2324.31	2690.97	2728.07	1513.63	2774.74	1666.78	969.407
69	667.893	1163.27	340.445	421.351	1063.39	546.821	1021.21	447.495	592.908	1673.92	3363.74	1518.29	817.659	992.346	1198.35	1727.35	401.319	275.628	489.955	756.849	1118.22	1154.74	1647.04	355.976	1391	1052.1	1364.06	2397.14	3187.86	3110.13	2128.59	688.053	1080.27	1313.07	1028.63	627.82	1303.81	909.591	1500.8	1017.08	385.113	860.345	1049.81	1438.96	2785.42	2201.51	669.05	1539.96	831.398
70	622.895	2439.48	869.957	1866.07	639.393	480.447	797.253	765.66	2418.35	955.668	320.678	2007.9	1054.43	1493.42	1314.39	2299.49	383.8	806.258	490.875	488.22	789.605	1602.4	969.95	466.445	1092.44	555.275	618.675	899.215	1337.36	1112.84	1469.11	274.592	378.777	682.202	1276.51	431.705	1152.39	333.743	880.947	576.14	743.64	1034.65	2186.17	594.01	2315.89	980.66	1100.78	1670.12	695.275
71	1312.57	1070.4	281.788	299.921	727.687	331.482	269.905	557.267	729.325	965.431	2330.25	578.495	646.443	523.58	518.768	542.165	509.879	424.668	580.719	581.624	787.512	1356.23	948.842	330.208	690.575	938.163	629.192	1760	4368.57	1614.63	1972.73	918.133	643.151	1133.78	1225.1	753.162	922.83	714.911	1041.73	1039.94	630.904	978.771	1814.2	2191.75	3826.5	1714.31	2232.51	1793.23	906.812
72	550.065	582.945	304.869	618.597	762.528	470.411	1315.18	1234	1747.5	977.781	3150.91	1205.11	307.501	396.379	1772.2	875.029	613.158	456.901	1210.94	766.484	1464.08	456.325	1779.98	269.12	1941.69	719.543	513.04	1801.01	845.884	2370.1	3773.61	1192.21	1533.96	2107.85	1048.65	1849.16	460.795	2431.78	529.231	961.077	619.206	809.8	1442.23	2359.77	1336.26	2355.97	3828.39	580.294	334.764
73	1407.38	1773.4	1221.06	1386.94	833.711	1127.93	2649.95	2522.01	3550.65	1955.45	4101.98	2591.98	1215.54	801.407	1203.97	1303.71	1031.56	703.579	1476.15	1548.5	1460.89	1507.65	282.829	267.514	1197.49	1180.83	1071.94	1835.64	3765.47	3867.55	2357.91	1502.61	1450.74	1294.99	736.55	551.871	3789.62	791.057	547.043	594.868	448.5	1255.54	2652.54	2097.09	2931.39	3623.85	2801.25	1601.81	1048.35
74	742.991	678.055	465.265	397.659	863.337	777.834	533.54	801.415	882.992	1080.13	1447.69	811.12	1010.02	733.107	1006.1	348.563	693.424	920.617	884.467	1125.91	768.829	747.884	1025.08	644.491	1530.14	386.741	416.255	979.955	683.487	883.351	1041.93	629.489	796.564	1358.37	528.14	1053.61	957.614	758.178	581.574	690.535	525.781	1089.32	832.599	1215.57	861.291	1503.13	1519.89	600.465	260.891
75	1777.35	1434.78	827.241	1196.64	607.796	254.399	1832.5	590.62	2080.17	551.554	4558.77	1860.13	694.024	830.258	1100.94	1183.31	1198.69	638.227	957.161	410.668	1581.84	1406.95	787.94	276.993	1603.92	1310.45	1464.9	2127.12	3321.24	3198.25	2214.81	1221.52	1577.92	1933.96	1637.25	1105.52	1939.23	1043.68	344.466	1828.96	549.646	528.818	1405.22	2513.47	1859.81	2106.23	1361.43	524.561	652.2
76	532.83	560.085	637.253	611.452	606.888	575.013	712.999	960.168	641.169	1578.27	1992.02	887.581	817.966	837.059	877.721	519.569	252.075	360.73	475.186	938.241	671.029	1043.59	377.418	317.043	652.235	578.58	639.735	922.544	2256.29	1527.37	1690.72	537.683	624.023	877.026	671.285	471.356	1719.17	514.68	623.375	671.349	306.269	588.059	1148.35	925.815	1742.03	970.871	952.179	1178.4	612.894
77	549.489	603.063	260.538	430.712	588.329	519.818	438.8	610.235	806.916	868.946	1380.31	937.1	753.56	465.183	802.309	484.73	581.587	471.29	509.3	640.389	538.212	669.501	962.656	246.204	1019.03	413.779	464.085	881.194	649.082	800.539	974.656	611.411	680.107	1059.01	472.306	863.001	489.519	724.947	753.761	816.124	386.336	1463.47	1380.85	1416.67	1893.51	1980.88	1805.11	1081.29	476.44
78	686.381	934.947	304.999	517.742	679.141	585.344	645.721	1253.86	244.201	1609.18	2314.63	1121.02	708.933	679.383	966.508	303.505	264.901	372.084	331.416	712.263	1095.87	1989.33	664.949	247.42	831.024	778.46	713.524	1080.73	1637.36	1573.08	1723.71	579.04	726.649	843.447	645.134	506.962	879.505	525.827	761.691	932.916	400.386	870.74	1768.34	1165.91	2422.65	1913.44	1596.3	1613.65	1203.43
79	450.056	683.996	456.504	505.344	643.628	482.848	513.376	834.732	595.499	783.631	1254.98	642.178	826.413	660.57	935.275	296.693	483.596	656.035	681.796	669.615	587.871	730.845	654.826	324.887	1429.43	375.238	380.295	969.71	732.886	775.864	853.778	714.33	753	1245.65	424.956	856.381	870.446	795.814	451.586	260.609	457.586	587.413	658.174	1119.54	662.645	1174.94	1123.37	616.426	321.336
80	525.467	1126.4	594.256	277.36	787.964	572.374	425.696	569.071	243.787	1294.09	4531.02	885.153	662.724	572.776	893.564	296.134	258.109	287.897	305.17	601.409	991.229	1397.25	636.295	269.164	856.08	581.856	610.63	827.799	1436.1	1401.54	1556.17	591.404	553.241	856.232	555.082	458.108	1230.58	410.493	874.342	775.305	291.395	895.945	2411.87	1526.23	2173.59	1380.65	1383.53	1425.71	1188.41
81	1344.49	1578.7	1133.41	1256.06	824.559	1004.56	2350.27	2090.34	3234.12	1830.53	3897.11	2441.19	1140.6	679.544	1026.82	1115.18	980.922	678.797	1293.91	1404.73	1378.73	1349.57	238.328	276.841	1153.37	1105.72	932.672	1727.92	3688.75	3661.13	2165.18	1483.17	1450.13	1254.54	799.031	535.791	3722.3	694.334	442.231	528.616	410.956	1088.85	2470.68	1940.33	2556.91	3094.63	2470.24	1365.76	898.753
82	365.039	652.657	536.777	453.669	961.05	633.968	448.655	761.626	1621.87	1426.89	1672.37	1040.14	543.66	626.718	1490.66	892.906	420.265	592.946	706.551	980.279	469.848	723.324	286.988	236.202	1219.51	235.498	333.68	740.77	774.217	655.475	1623.51	948.095	781.175	1270.51	614.82	742.067	795.088	923.112	673.914	606.298	459.867	835.65	2020.95	1535.72	1154.22	1434.92	2129.82	1128.26	517.433
83	485.315	854.127	1078.85	1313.08	689.503	419.208	1352.16	811.412	798.307	786.293	2095.32	1283.56	1486.65	1038.15	802.333	251.477	657.295	585.57	1137.38	565.605	888.792	624.932	255.913	234.797	1205.07	1044.58	834.555	1409.02	2119.54	2056.87	1811.29	1331.7	1099.76	2047.8	967.473	937.148	1880.25	625.083	280.927	1023.3	587.48	703.948	1422.4	2538.55	1152.43	1803.91	1386.37	1038.37	440.045
84	253.535	1148.19	328.374	395.582	799.241	401.462	606.332	588.509	297.176	2745.01	1818.39	1177.44	887.055	670.215	563.283	432.759	281.952	334.336	234.091	968.431	526.546	1191.42	958.827	316.431	868.105	798.164	1085.8	1282.51	1694.9	2073.38	1646.89	895.52	820.835	1222.21	563.732	499.756	946.977	585.591	977.121	392.462	376.39	797.773	893.88	1322.15	2244.81	723.435	1136.33	1577.4	831.827
85	749.543	904.275	262.695	310.14	1039.28	345.189	573.764	276.309	1105.84	1332.87	3273.47	997.809	1012.83	478.225	933.629	742.074	479.498	280.126	470.952	587.628	1382.17	1100.16	933.643	233.253	1389.04	1623.65	1575.68	2063.16	3172.67	2948.24	1583.67	1190.74	1055.82	1748.56	789.559	783.255	1482.92	1322.67	910.89	1062.87	310.572	965.128	810.341	2149.58	2439.86	2638.8	2298.85	1554.89	763.403
86	1501.87	818.41	682.852	1081.76	1184.68	741.378	1391.79	925.947	2935.23	1089.51	2732.79	1776.17	1088.64	876.299	1934.34	2753.91	1379.05	634.401	1741.15	865.938	728.013	730.98	2159.09	233.045	3082.45	844.206	1029.73	4285.5	3470.44	2238.49	2655.81	1785.28	2443.99	3098.41	1491.77	2584.21	1657.84	2872.36	1097.54	1869.63	1103.96	1237.28	2605.81	3998.12	1937.69	4266.44	3465.79	1341.22	772.644
87	1134.62	1413.44	1428.5	1753.31	755.882	451.914	734.782	690.093	1088.16	1061.11	812.804	1662.06	742.361	674.307	1587.2	592.179	451.021	460.257	881.696	362.864	1542.77	1506.71	571.007	232.982	1370.33	812.136	713.343	1515	1702.6	1534.56	2387.7	346.389	348.175	1198.15	884.511	355.407	1364.03	418.286	1352.78	1118.65	1298.35	1373.27	1313.76	1408.56	2451.78	1465.06	1629.61	1074.94	880.589
88	499.848	682.415	328.076	402.625	768.939	356.063	945.721	227.899	750.55	1220.72	3400.09	990.16	1402.23	850.905	849.265	2025.04	1098.3	269.428	358.979	507.535	678.491	845.538	1210.28	325.451	1264.31	1394.68	1535.43	1921.83	4581.07	3454.78	1385.18	953.585	1401.05	1089.46	516.023	531.378	1676.76	1520.4	1036.6	1879.94	490.465	508.126	1111.27	1760.07	2467.86	1145.9	2268.67	967.229	564.999
89	583.138	882.688	383.364	363.488	763.423	495.76	567.596	542.931	509.014	1248.5	2440.34	839.433	656.261	332.339	689.926	346.625	231.276	221.723	377.436	735.065	640.53	724.899	514.753	237.769	541.265	655.329	670.005	805.824	1853.9	1015.58	1175.41	619.574	689.768	889.725	508.135	508.717	1396.54	533.038	490.084	848.134	397.664	496.075	1025.46	939.81	1412.31	1408.39	1231.06	1132.77	800.249
90	570.857	664.96	663.671	491.266	775.217	556.885	782.979	761.197	649.612	1610.79	2297.57	1001.75	571.616	359.897	805.289	357.183	234.136	228.697	350.621	865.872	888.178	1006.16	562.504	321.374	566.804	469.401	531.987	808.678	1354.46	1437.64	1522.31	484.031	493.47	805.625	383.277	347.554	1436.64	377.945	349.205	465.515	221.069	486.248	849.605	914.459	1169.87	958.976	994.736	808.661	512.949
91	771.31	1095.18	387.558	791.399	1065.13	673.691	935.82	822.631	2561.03	947.586	2811.75	1481.74	1172.26	747.058	1677.93	1929.72	1445.64	530.831	1399.07	781.915	916.306	692.278	2777.25	220.476	3188.75	1124.62	718.357	2450.96	1556.34	2250.79	2295.5	1284.56	1734.2	1427.51	1045.87	1986.98	1082.59	2618.2	970.025	2685.94	484.204	756.947	2058.02	3624.29	1654.13	5106.27	4030.03	979.259	551.648
92	655.744	1223.01	424.818	1235.79	452.271	352.665	869.611	469.28	852.361	876.75	444.569	1271.15	865.403	662.121	744.265	932.306	338.536	460.358	422.868	396.291	1134.76	1131.7	342.628	217.503	820.469	693.506	835.678	1186.66	1508.51	1485.36	1363.9	279.235	443.341	1212.25	517.495	698.02	1381.54	420.594	1347.27	666.572	793.293	1353.64	1428.9	1210.63	2179.49	1169.72	1694.16	2012.01	793.654
93	382.094	907.457	266.079	298.51	491.507	300.981	335.526	366.043	373.689	1639.33	1470.98	877.017	599.104	682.264	305.463	599.89	565.415	335.125	235.65	503.795	437.73	957.888	625.456	290.396	662.429	541.231	642.086	1215.2	2153.42	1407.19	1469.6	524.644	443.146	941.031	262.833	522.704	749.88	701.952	647.399	671.406	216.364	592.889	1617.99	1248.35	2114.78	847.511	1398.92	1540.92	895.202
94	1224.5	2148.15	568.294	1321.05	637.664	302.759	686.362	633.464	3240.18	948.255	793.63	1790.4	1294.07	995.54	1155.32	1579.27	521.788	531.65	902.101	373.5	1775.28	1966.44	466.665	215.623	2176.39	1255.73	936.139	2710.31	3080.35	1438.79	2279.18	523.241	554.795	1525.36	1231.37	670.095	1820.78	820.388	973.255	1398.22	779.916	1042.55	1477.33	1373.77	2025.51	1230.94	1302.02	1493.03	591.415
95	343.467	423.621	236.003	387.529	823.93	607.719	471.929	544.3	1900.5	1148.59	1691.81	894.571	443.669	416.05	946.871	537.239	578.016	360.291	791.638	841.665	692.367	694.206	995.967	214.938	1203.16	582.357	398.234	806.761	1032.73	1038.53	1253.77	565.634	1179.68	998.303	565.832	1044.62	830.334	1089.36	427.652	676.45	309.181	665.5	688.059	1638.37	626.645	1325.12	1351.67	496.734	333.15
96	1069.92	1073.92	796.255	824.519	840.124	682.89	940.139	639.479	2511.56	1305.92	1174.44	2677.94	574.726	474.044	855.64	636.111	309.461	349.402	1099.69	805.773	905.118	841.633	331.582	250.77	603.479	447.244	445.038	860.964	1453.12	805.074	1024.07	214.162	235.415	696.755	430.886	246.854	1638.25	322.105	610.574	522.185	374.311	555.474	694.687	583.208	867.621	488.961	802.736	730.595	432.043
97	337.683	486.949	266.675	270.506	614.558	449.462	403.505	605.117	445.993	648.576	798.384	498.539	622.378	475.882	587.399	213.616	562.565	623.592	629.469	583.405	490.646	476.851	730.166	376.228	1140.02	296.226	236.704	773.997	483.983	571.455	704.656	461.874	492.581	1082.76	342.251	732.033	624.263	603.84	405.017	597.321	408.519	774.827	742.416	1060.51	673.955	1347.18	1237.39	554.684	242.615
98	1035.22	1008.46	423.866	703.199	303.162	358.641	922.053	737.526	785.693	792.874	2086.47	1798.77	1049.98	813.684	774.712	491.04	626.882	879.874	513.39	560.524	1229.93	1454.34	405.746	213.224	981.837	842.351	810.89	1075.99	2005.14	1879.76	1635.25	854.612	891.679	1311.54	1218.49	596.772	945.247	524.874	552.057	1316.9	463.46	1304.79	2062.27	2124.85	1938.9	2114.22	1033.15	826.904	822.928
99	335.236	1371.04	254.834	434.71	688.609	411.956	531.496	709.719	333.686	2034.8	2112.79	1148.76	931.443	693.176	549.474	660.778	277.842	523.923	317.14	926.934	575.425	1815.06	434.433	352.106	821.655	852.056	1120	1151.06	2356.1	2096.25	1346.91	1134.78	611.885	810.508	675.9	861.025	1066.74	1125.64	915.625	979.398	227.042	867.72	2671.91	2258.17	2786.55	1696.51	2240.48	2489.36	1076.43
100	1224.39	1194.48	296.589	460.821	1020.49	300.108	1409.58	259.465	829.931	1486.18	4505.42	1320.46	1636.09	1405.67	1150.51	2424.62	872.188	212.628	816.737	488.414	1707.85	1617.75	2227.36	219.526	1678.38	1617.42	1975.49	2975.24	5430.94	4013.5	2888.66	991.16	2725.82	2690.06	1183.78	987.135	2135.01	1173.28	1211.62	3801.44	1221.5	425.594	1336.87	2413.92	2904.79	1846.01	2758.24	847.57	1115.05
101	1449.31	2252.63	390.558	1629.8	967.105	401.696	713.617	491.56	1379.86	1016.72	659.821	1996.09	1039.85	854.969	884.919	1441.71	242.5	337.289	1164.8	406.619	2131.56	1628.5	408.039	212.026	1382.19	1076.05	1373.27	2689.18	3125.68	2202.61	1933.13	461.135	747.27	1582.71	1548.6	1068.32	1525.64	1318.99	1697.67	1110.13	2166.34	2474.08	2425.42	2079.69	3341.98	2788.9	3612.4	2542.03	1835.74
102	1710.58	2038.15	766.371	1526.11	443.831	273.041	1642.39	425.936	1962.53	694.945	5247.25	3296.28	731.143	793.899	1286.97	1394.93	1096.8	601.366	1111.29	441.55	1892.04	1055.99	679.456	210.401	2049.91	1664.52	1549.69	2790.72	3514.37	3770.6	1967.99	1399.67	2123.09	1351.62	1438.09	1194.75	2214.28	1484.82	750.211	2872.97	670.314	833.059	2855.27	4099.03	2360.26	4899.35	2278.78	1018.67	1138.67
103	498.387	1044.16	209.193	602.178	807.212	814.719	626.321	1036.68	1307.06	1404.97	1713.01	1441.47	1038.55	1091.64	1396.09	1444.03	582.195	849.244	985.729	1193.9	1146.63	824.508	1106.59	329.916	1922.34	576.421	495.679	1317.79	905.861	1588.98	1224.03	673.22	1374.68	1209.61	773.619	1206.38	805.888	1476.5	827.72	1003.74	462.322	1505.49	1927.12	2089.3	2056.7	3010.97	3386.2	1189.85	683.178
104	1830.89	2453.37	300.529	1373.1	1919.09	2009.35	1925.73	2454.5	4142.99	3530.37	4194.41	2178.16	2790.46	2732.41	2885.8	2854.7	471.77	1123.46	1953.74	2952.12	1892.83	2020.71	208.844	501.931	2969.19	764.481	1061.03	2653.66	2072.57	2706.3	1436.06	1601.08	2157.8	2892.93	1309.41	2463.97	1579.46	2848.43	1682.04	1623.16	1332.76	3490.99	3827.43	4829.49	3758.87	3968.6	5005.06	3025.32	1259.51
105	845.544	1076.21	361.45	391.476	875.721	303.455	626.977	374.796	436.951	1491.71	3249.54	1040.33	1298.53	816.205	602.751	1061.3	825.832	252.301	301.516	499.228	853.976	1178.74	1017.91	208.528	1360.86	1184.98	1602.18	1824.74	3860.57	2487.62	1530.65	937.615	1003.29	1116.27	570.112	729.601	1378.76	1619.92	861.12	1856.2	415.224	528.73	1371.73	2073.8	2554.6	2011.56	1976.72	968.485	812.296
106	1945.35	2232.39	1000.22	1455.16	923.232	515.945	1521.37	799.99	1750.97	1138.78	3095.66	3979.34	890.112	1024.53	959.064	2160.72	2353.8	1105.91	925.447	600.3	2276.23	1748.02	919.799	354.303	1750.52	1393.2	1354.47	2325.14	2362.01	3380.6	1692.36	839.93	1192.31	1680.19	1301.92	677.616	1825.27	894.719	544.732	1448.19	421.285	564.785	1046	1848.27	1634.03	1980.43	1038.51	207.836	652.916
107	813.607	572.921	330.211	493.123	628.893	522.398	734.506	660.679	1322.7	796.227	2149.2	1043.19	933.102	834.721	1552.91	1761.77	1414.7	444.967	1049.62	578.851	1123.82	639.42	1853.01	206.831	1979.01	467.346	526.697	1413.68	1352.23	1633.85	2521.21	863.144	1395.71	1445.77	881.636	1194.4	614.391	1565.64	677.91	1293.79	515.039	688.299	1246.38	1922.23	1471.75	2394.54	2226.61	469.765	344.155
108	841.665	927.44	721.145	792.694	549.154	485.856	885.466	656.631	1184.91	700.819	1682.79	1041.22	743.94	539.518	624.579	251.093	617.335	620.579	630.145	722.268	972.93	927.685	258.443	205.713	624.816	567	467.996	995.63	1350.33	1192.11	958.034	629.945	643.357	809.36	557.075	342.929	1270.14	277.001	223.208	557.031	218.09	821.134	1044.31	1114.02	1173.55	1221.69	634.135	607.563	484.401
109	429.511	929.564	259.94	278.341	683.857	248.459	591.398	315.124	318.385	1154.03	2475.14	925.964	983.889	637.355	694.707	854.755	348.724	247.107	215.631	388.189	771.477	1124.4	792.496	205.634	1079.1	1172.1	940.206	1587.27	2336.36	2009.52	1124.83	671.796	685.129	1066.66	323.678	651.719	941.051	977.194	722.061	889.322	300.949	489.725	1280.71	1793.18	2069.56	1250.57	1601.18	1147.1	596.124
110	1115.54	1449.74	1285.72	1635.04	1004.8	724.754	1158.38	761.725	3161.74	1403.19	1096.5	2777.77	765.611	484.103	1402.93	1179.85	410.822	387.087	1059.32	811.577	1286.04	1359.32	358.146	203.525	509.095	443.103	439.705	577.981	1491.82	836.072	945.916	212.452	231.859	587.96	374.288	239.329	1891.35	321.99	410.944	461.324	244.969	483.87	708.876	550.986	873.441	523.711	828.898	785.441	376.56
111	1388.06	3973.02	1412.81	2265.73	1228.72	1558.41	1030.51	1827.6	1685.8	2878.95	953.707	5364.68	1459.28	1877.97	1541.3	1339.89	371.759	335.858	714.885	1175.47	889.957	3241.49	439.984	202.984	1338.03	927.335	1177.66	1784.58	2775.95	1903.4	3812.56	714.898	475.356	2175.84	1198.26	712.741	1166.2	507.308	3577.44	1303.64	1954.4	2579.92	4976.14	1505.31	4038.5	1456.61	1410.55	3422.72	2715.49
112	910.304	941.929	202.4	418.933	625.717	435.675	546.408	923.004	645.283	1426.49	2277.07	848.996	637.904	1787.04	1061.68	409.075	284.35	377.075	396.313	744.058	1321.97	1819.87	572.592	292.283	702.546	628.237	676.225	1283.91	2114.95	1539.65	1644.38	549.529	679.379	886.042	673.817	495.958	1716.08	559.042	592.879	793.371	346.758	632.583	1478.5	1211.16	2026.13	1606.2	1512.47	1317.94	699.438
113	611.89	1333.73	338.361	483.053	1269.74	878.496	1213.61	1051.66	1659.71	1922.1	4049.63	2128.34	792.456	381.988	1515.49	617.649	200.954	246.121	626.061	869.341	407.571	708.884	953.141	200.939	1757.55	944.901	986.796	2387.3	1483.96	1475.42	1760.89	1291.13	1822.05	3265.11	570.077	2615.56	1718.71	2455.76	1101.96	1766.73	997.381	2291.89	3829.57	4428.59	2226.47	4461.22	4244.27	2370.95	1012.12
114	506	836.614	195.161	464.72	951.393	554.79	547.88	979.91	1561.77	987.354	1819.32	978.411	806.085	626.49	965.43	605.885	495.741	510.794	1236.72	828.068	893.59	575.575	1096.27	283.031	1323.24	652.15	512.3	1655.88	672.175	1566.33	1490.9	685.638	1274.48	2043.02	842.962	1479.11	556.204	1429.36	705.883	933.97	578.416	1626.33	2164.89	3153.76	1987.53	3494.9	3094.4	1384.18	388.332
115	389.996	1182.11	223.189	259.789	392.021	457.169	674.532	571.881	1264.5	1062.31	2822.76	1378.12	339.671	371.293	1379	1105.29	307.789	1877.33	439.924	410.289	2294.59	1485.79	210.619	372.15	1059.81	920.612	955.917	934.276	1854.04	2079.25	548.804	1090.63	473.807	1009.13	1179.53	858.683	509.739	577.437	482.305	224.538	951.656	2314.2	3650.79	2568.99	1180.79	2503.85	1051.28	1833.27	737.36
116	297.155	537.465	801.386	1241.23	750.576	1025.53	789.977	2759.99	2350.53	1730.72	1440.46	2521.85	773.684	717.446	1566.68	516.506	953.053	406.154	811.25	1046.09	456.896	730.394	1630.12	192.579	2160.99	1385.76	818.62	522.49	1602.98	3293.16	2451.02	1007.43	1041.71	1132.15	593.901	1575.32	1073.66	625.788	547.533	615.136	766.02	942.786	1906.43	1440.55	2937.9	7065.46	6650.55	1970.16	589.074
117	449.646	1465.86	456.936	417.276	613.755	761.831	441.991	651.969	2497.08	1397.62	2114.08	2328.87	891.322	713.987	1006.67	286.714	720.35	390.27	482.499	941.909	514.13	742.726	668.399	191.956	1516.74	631.313	462.469	1072.31	990.813	556.513	1879.68	1590.53	629.265	1566.67	458.686	477.856	683.194	555.049	1064.92	1437.39	1250.49	2406.09	2417.94	1973.09	2359.57	2227.68	1927.94	1620.3	880.22
118	366.685	664.606	774.602	373.88	686.121	749.961	708.614	717.928	2661.78	1015.4	1188.27	1119.25	512.666	413.095	1362.09	368.947	920.866	267.06	1050.96	481.715	1740.9	853.835	2042.67	191.702	1431.92	525.975	613.515	800.98	1182.88	1782.43	2476.31	1295.99	453.965	1194.97	2344.5	1563.65	1008.13	1100.42	726.716	586.901	910.801	1110.08	1909.86	3046.25	1496.6	3260.93	1911.52	926.337	589.543
119	2236.79	1398.87	9984.6	8535.35	3118.79	2331.93	1363.11	1267.7	1595.59	6225.42	2539.97	9159.35	2227.92	4704.26	2699.21	5482.77	1514.91	876.735	549.15	1246.67	1127.58	6224.34	1021.72	773.64	6962.73	1071.29	1156.56	864.404	2578.14	686.879	592.808	295.913	657.235	4290.61	1637.82	850.168	3853.28	190.686	3756.47	2733.21	2615.83	1912.92	3640.72	337.202	6511.18	3729.5	4890.6	2733.28	1608.29
120	758.411	1599.65	2008.8	1282.76	843.818	593.279	1070.54	500.904	407.582	1384.72	2107.55	2522.98	680.893	540.25	1082.55	188.546	1102.65	432.393	270.586	756.075	934.157	2354.69	1331.05	567.793	726.257	783.232	785.3	568.018	1784.72	2743.28	4013.21	1149.94	606.368	946.318	877.761	754.561	806.95	498.214	985.525	634.957	435.061	1112.02	1466.93	1439.63	2745.01	2161.75	1561.7	2448	2001.49
121	886.142	1141.67	462.433	672.656	371.174	382.205	656.192	773.56	1128.81	822.38	1534.99	1514.96	321.914	487.71	898.996	343.581	485.151	686.25	614.751	510.117	752.56	1133.89	296.085	188.375	1351.01	649.752	647.396	829.185	1577.84	1624.35	1324.29	945.623	870.246	759.87	846.836	384.463	739.598	361.436	676.494	874.149	313.276	1142.75	2395.48	1983.32	2248.27	1585.85	975.699	981.324	990.671
122	646.832	826.064	202.709	188.238	609.568	437.053	457.902	506.095	299.399	1107.06	1988.06	705.49	490.75	259.178	584.001	226.13	266.864	300.512	292.196	689.796	928.656	1053.22	488.44	319.363	618.145	479.995	478.979	711.125	1199.78	818.554	1081.56	522.686	634.544	815.033	466.946	363.119	1113.03	358.558	422.447	704.163	320.359	699.679	861.424	694.414	1193.9	1369.92	836.99	724.862	692.156
123	738.258	737.867	275.91	409.969	542.781	371.882	511.318	593.162	335.731	1006.66	1842.7	540.944	675.995	541.389	864.457	258.195	238.486	251.396	238.58	534.145	1129.96	1683.2	403.637	185.976	710.848	440.624	548.583	624.783	1398.83	937.001	1197.83	440.763	631.839	752.681	404.263	389.052	1034.28	442.077	565.331	720.492	304.15	963.168	1540.84	1287.12	2251.04	1632.41	1577.39	1302.79	758.458
124	337.283	508.271	511.448	632.181	644.225	946.048	605.606	2608	1426.86	1530.04	1222.09	1838.45	457.906	383.56	996.586	199.305	525.895	348.313	544.9	583.477	598.562	1076.72	1354.7	182.427	1581.77	1594.23	370.173	580.7	1277.2	2896.13	2402.88	812.36	395.261	861.883	426.713	588.452	1271.03	539.337	908.582	759.32	467.8	748.995	2552.39	1711.79	852.789	1474.22	5324.31	1467.74	509.106
125	2040.37	1760.06	361.13	624.021	239.725	237.434	226.951	504.604	680.898	586.12	633.747	1416.69	547.936	455.174	689.064	1335.41	276.981	369.971	330.775	239.506	447.928	1357.86	272.108	190.444	333.506	354.331	433.904	1410.71	1963.45	362.629	1530.95	387.001	430.58	916.691	1016.28	252.056	1205	180.82	1718.94	883.511	1588.1	1284.03	1672.71	479.303	2328.89	593.58	1209.46	2243.95	1191.05
126	808.769	905.735	698.585	963	381.788	237.391	365.436	371.495	722.15	479.946	338.651	907.245	611.841	581.66	626.536	451.836	340.793	465.394	447.25	183.155	1017.06	1005.75	275.814	267.564	789.239	478.43	473.615	1157.12	1124.36	860.45	1125.14	179.768	295.248	1138.43	490.967	338.174	1140.3	322.155	556.876	533.673	659.415	563.516	435.429	429.786	834.339	469.814	616.1	509.414	293.197
127	527.821	488.623	228.036	448.9	821.222	363.471	723.087	501.624	1428.11	460.804	1629.56	740.619	711.965	509.499	961.827	1229.35	869.69	258.156	829.122	483.409	554.256	441.551	1341.23	179.664	1648.33	668.465	447.13	1453.77	700.299	1108.19	948.1	549.784	1244.82	1144.44	557.133	1288.23	741.798	1766.02	444.954	1663.45	395.933	598.857	873.566	1845.75	879.389	2067.06	2467.48	480.825	204.826
128	326.479	400.598	177.586	309.394	606.839	404.186	471.534	727.829	1026.02	853.065	1204.3	692.125	532.997	500.589	763.951	362.815	497.314	566.41	495.325	585.736	479.236	435.385	877.535	208.161	1103.35	391.68	277.688	809.149	579.288	848.415	1028.85	674.457	621.327	988.063	548.606	952.686	389.382	919.195	486.577	572.967	326.124	851.9	1295.67	1941.43	1113.21	1778.8	2048.48	694.174	313.813
129	578.237	486.829	222.169	372.077	660.459	661.681	290.348	518.374	622.186	774.722	1378.29	826.443	812.829	609.886	888.896	265.43	318.171	289.249	598.656	876.221	558.956	733.161	513.121	176.069	720.271	294.566	309.235	569.931	609.816	699.433	971.237	387.374	400.89	894.275	422.241	621.087	655.388	583.844	502.118	550.411	279.855	1205.48	1131.06	1096.58	824.584	1655.05	1484.39	715.605	465.248
130	359.822	517.997	177.525	326.387	412.003	405.834	379.025	425.564	808.734	567.08	991.107	787.464	459.822	536.938	781.845	1259.42	677.651	430.697	433.391	404.354	491.757	550.195	1603.66	174.57	1331.79	413.58	349.226	1152.7	617.676	1038.55	1098.6	565.159	858.536	999.305	411.126	771.716	418.475	911.53	618.904	756.356	395.981	832.558	938.352	1564.17	1451.33	1473.89	1537.94	514.28	454.205
131	1049.9	973.885	753.154	672.196	554.653	591.845	1602.06	963.929	1985.5	1100.23	2144.11	1260.44	611.296	415.389	504.979	283.613	311.554	392.709	755.909	1028.47	1249.84	1134.69	228.98	170.62	617.944	552.362	546.283	940.401	1624.1	1303.41	1230.87	773.704	660.617	794.37	592.408	354.881	1580.15	343.356	224.033	607.913	222.995	971.18	1413.75	1168.54	1118.13	1075.46	717.139	599.467	665.861
132	328.54	489.731	463.06	458.931	484.498	300.802	395.737	377.508	637.798	650.31	880.346	1128.99	485.071	400.458	583.06	231.065	393.883	315.375	285.175	224.352	447.238	639.883	725.315	181.727	527.485	281.181	374.96	571.01	463.104	583.504	792.763	479.615	568.323	642.202	243.34	578.775	512.81	399.369	730.84	490.787	351.494	1425.83	900.735	895.592	3040.19	1645.36	1463.48	1525.48	424.3
133	1018.1	765.744	487.658	562.754	478.115	169.879	373.174	424.938	506.258	530.018	2231.46	875.143	560.112	532.067	530.288	291.199	510.554	590.885	604.346	367.372	737.735	738.407	318.072	168.25	849.143	541.389	371.993	1375.77	1320.29	707.192	707.486	561.622	412.374	966.961	755.625	333.657	692.071	319.551	770.454	1173.02	602.319	1412.27	1786.87	1522.66	1706.63	1934.3	996.031	1150.28	1132.97
134	544.58	1297.99	260.881	499.299	297.75	303.311	513.255	315.624	1136.76	603.158	2041.83	1472.74	321.086	353.257	356.507	264.273	325.274	855.724	298.998	469.227	551.337	823.476	167.086	170.165	553.433	367.389	412.437	715.058	1017.81	913.261	672.337	659.346	549.436	495.858	521.061	312.758	698.394	288.676	342.57	636.579	338.919	868.148	2282.01	2015.83	1482.4	1334.74	820.396	955.135	732.962
135	485.674	560.135	439.716	489.295	552.481	607.364	503.04	812.989	566.438	652.849	1140.42	609.51	404.777	482.183	1028	485.089	391.863	700.418	643.44	988.433	492.351	473.564	583.125	200.01	1071.85	390.9	291.152	756.423	431.74	632.893	556.22	473.719	640.951	977.805	378.971	634.793	642.309	625.765	612.196	538.082	299.42	1030.48	1262.66	1277.83	1115.33	1598.92	2251.5	808.867	166.833
136	613.832	1035.55	271.8	523.5	630.479	539.258	847.347	563.288	1047.89	905.035	1632.05	1075.41	1041.77	754.62	1384.65	872.264	437.474	436.901	955.63	713.35	806.595	654.857	768.263	165.524	2379.37	590.436	500.25	2054.45	861.523	1458.39	1555.64	852.595	1384.09	1649.2	774.289	1330.39	959.331	1608.1	741.028	1511.56	524.46	1020.42	1992.18	2658.74	1567.88	3410.16	3342.63	936.295	479.594
137	743.492	926.857	402.61	629.485	348.369	410.805	516.805	644.024	484.736	785.225	1127.03	972.881	556.309	500.454	678.122	576.736	384.86	632.169	478.233	646.138	667.534	959.306	235.025	226.371	528.029	342.826	319.318	523.229	766.449	741.398	663.84	358.961	315.249	419.69	398.494	181.933	550.905	164.632	332.164	523.561	262.564	1508.04	1399.71	1035.66	1401.03	1033.59	735.962	651.465	761.72
138	519.079	505.068	409.104	558.359	1037.64	434.575	1371.38	696.594	3490.59	923.523	4029.86	1325.93	1009.07	554.474	1428.3	678.456	1127.58	370.717	1589.51	528.859	1777.43	529.202	1948.49	161.72	2363.99	781.214	655.775	2426.19	1928.91	1951.51	2201.09	1161.46	1870.57	2680.79	751.294	2983.28	1116.51	2983.8	434.851	1639.68	584.539	734.773	1840.71	4199.82	1300.73	4052.49	4033.61	1047.53	366.808
139	556.021	429.335	213.686	391.421	451.545	324.832	509.529	334.031	1693.6	510.517	1241.67	668.072	367.118	587.774	914.258	1487.32	707.054	308.05	462.67	336.115	446.684	397.53	1125.2	200.721	962.344	177.024	240.895	997.818	719.529	589.385	1056.97	335.465	556.587	884.501	342.414	684.574	622.991	935.87	288.196	588.65	344.679	323.723	661.065	1289.72	762.298	902.295	1566.48	235.64	171.626
140	1150.86	2183.21	204.276	825.503	296.741	332.665	606.371	330.438	2006.57	641.231	523.616	1500.11	847.829	728.494	715.5	1750.28	315.469	352.159	584.434	331.245	1752.94	1322.24	419.379	160.248	1628.86	1134.99	824.819	2259.44	2569.67	1250	1286.8	366.925	542.126	1525.16	1049.52	579.751	747.48	955.876	1105.99	1517.89	1051.57	1191.51	1575.27	952.085	2252.57	1854.21	2050.08	1668.9	694.133
141	379.455	371.049	257.553	278.51	656.534	311.535	434.15	723.85	1854.9	645.414	1977.3	457.447	608.261	288.175	920.46	562.649	665.462	398.511	907.91	542.05	799.879	322.349	675.389	159.55	1309.51	917.018	633.835	1050.25	940.996	1264.3	2111.85	978.401	1166.88	1322.25	1004.3	1331.46	637.227	1159.89	592.129	671.443	535.974	1057.71	1319.35	2956.8	1882.53	3102.35	3436.65	741.41	360.711
142	324.381	478.756	551.831	572.1	645.936	1108.79	634.249	2872.82	1354.93	1453.66	1016.72	1995.31	418.697	455.055	1055.3	203.944	449.116	312.256	566.044	652.791	618.845	970.673	1603.26	159.488	1769.5	1325.62	395.257	539.242	874.124	2860.03	2808.47	605.545	488.69	811.933	460.369	568.439	1116.12	523.862	736.699	826.477	465.685	830.923	2066.02	1713.29	910.46	2076.05	5224.67	1260.44	204.529
143	492.103	410.139	1660.74	495.844	290.511	614.783	336.243	3044.34	355.335	543.065	805.587	4120.39	417.728	1529.28	1072.28	773.304	270.858	699.324	252.275	502.991	508	1093.2	335.031	513.405	1288.91	156.99	186.709	520.768	228.501	477.494	4394.59	372.211	262.81	468.805	320.466	348.865	285.386	390.322	1160.09	293.996	173.601	768.943	1083.42	1171.82	4810.62	1130.31	1299.38	882.896	421.62
144	447.834	742.821	172.884	156.808	665.886	298.751	665.582	482.967	265.548	1347.47	1675.17	772.295	511.125	462.019	619.816	745.749	158.14	263.344	207.57	610.515	1379.43	990.301	805.115	296.993	971.99	809.425	880.216	1158.69	1568.01	2011.31	2287.69	495.891	738.553	977.179	537.109	540.811	755.391	857.89	737.344	288.151	335.951	735.81	773.166	1128.16	1812.22	1166.34	1490.44	1139.4	619.289
145	686.674	1842.51	154.365	475.794	960.845	604.2	439.664	704.327	581.934	1969.33	2693.86	1274.65	955.436	1068.59	659.739	1765.95	461.256	714.737	654.111	1305.93	1445.49	1808.16	726.492	370.559	1490.16	1393.09	1162.95	2071.73	3087.33	4041.36	1009.15	837.409	894.824	1606.91	591.599	905.185	1552.72	1434	1484.6	1187.5	362.766	1307.36	2883.36	2539.55	4342.76	2227.42	3348.96	2825.41	1393.27
146	468.189	564.936	342.972	418.439	692.244	558.725	419.864	441.769	1046.64	804.225	1097.9	768.964	658.392	428.875	884.303	276.894	558.528	480.375	713.564	654.258	459.944	708.694	713.883	250.239	740.419	283.033	328.917	504.139	822.428	860.189	745.144	582.014	421.083	629.283	266.711	478.564	755.95	567.419	521.933	295.497	277.731	537.031	753.942	894.181	676.264	793.375	711.758	542.528	317.992
147	692.543	242.655	180.584	200.774	304.548	553.768	396.634	503.486	1879.17	391.748	1777.09	593.889	787.09	292.962	1211.73	374.125	563.214	337.29	1227.96	240.954	2235.58	349.137	341.49	153.473	2093.63	477.832	461.539	1176.08	1498.03	1398.29	929.315	565.604	538.467	1700.62	1549.39	1312.25	1754.43	1517.17	272.397	384.197	818.697	1201.33	1615.4	3450.17	1006.42	4171.08	4170.56	1123.75	168.279
148	1033.36	1403.68	799.799	1648.64	520.244	221.725	915.333	417.101	2444.4	771.645	454.829	1899.43	582.318	756.355	934.681	988.311	333.961	572.399	563.805	202.58	1383.49	1130.79	360.45	308.329	1267.66	743.296	925.892	2705.06	2776.46	1304.48	2713.8	276.001	556.64	1884.73	1097.7	668.508	1361.84	601.592	316.696	534.954	951.232	676.339	1211.92	1289.99	2442.54	1114.72	1346.5	1707.04	485.164
149	1443.17	1624.97	816.744	1314.52	347.645	157.732	1273.94	600.119	1109.93	593.981	4674.69	2352.47	728.686	529.404	788.756	1099.39	1283.53	680.874	1236.88	681.145	921.599	1011.14	252.65	152.588	1106.05	858.771	1154.98	1330.47	1320.98	2035.54	1644.05	307.155	1200.14	991.525	824.18	488.916	973.971	574.121	726.205	1662.79	600.591	730.707	623.847	1242.9	1295.43	448.003	992.325	956.035	493.271
150	681.862	753.393	436.675	570.768	401.318	188.88	655.193	310.825	835.155	546.62	1565.42	1687.41	381.748	687.528	339.392	1348.04	1077.93	550.962	480.717	256.703	820.368	666.468	447.052	169.89	868.77	523.142	581.75	1022.72	1187.78	1393.23	928.795	468.193	607.317	937.868	574.425	359.518	854.232	410.172	287.145	941.587	260.507	330.35	868.313	1083.7	1019.5	844.088	805.832	250.983	349.395
151	540.02	669.406	392.498	587.76	1053.79	885.698	667.661	989.856	1499.29	1011.9	922.379	817.531	1078.59	875.156	945.576	457.069	1243.41	1330.87	977.688	866.092	927.623	851.856	1189.12	633.165	1715.37	410.86	405.202	1353.53	777.802	1056.38	1353.46	703.867	818.869	1736.19	642.435	1108.55	1022.34	1039.91	509.869	875.401	560.264	1163.34	223.565	764.248	905.993	2007.86	1681.02	394.705	150.156
152	564.663	850.582	966.289	1467	532.804	582.076	899.663	2063.54	1682.1	1151.43	617.149	2308.05	483.084	402.938	850.275	344.864	422.355	266.07	656.737	348.651	701.419	1191.3	631.129	145.77	1617.91	1666.54	639.116	1158	2175.81	2946.6	3114.79	302.723	230.548	1130.45	588.591	344.296	1626.55	254.648	505.863	686.361	836.531	739.024	931.462	968.616	1861.92	1342.94	2365.97	1759.69	489.878
153	845.987	1198.9	1461.01	1490.76	538.169	241.181	322.761	145.273	1340.42	561.351	743.173	1020.12	506.506	589.866	801.654	983.418	246.218	282.706	380.353	184.854	1203.88	1325.74	253.955	157.559	590.279	387.199	579.851	1022.89	1249.94	1055.35	1552.53	155.364	399.461	1117.38	325.118	412.452	1138.48	214.404	1601.08	1357.84	1337.01	1994.65	581.906	803.584	1714.03	663.294	1504.92	804.214	1679.32
154	553.107	874.992	372.239	376.248	750.365	804.938	438.13	987.866	1300.32	1106.48	1825.08	1427.14	1152.85	621.977	1330.62	248.52	594.529	489.757	1011.67	860.495	770.226	864.447	2030.73	145.001	1998.95	560.048	652.318	1597.77	1039.97	1608.53	2737.23	1485.57	1097.82	2440.84	857.88	1473.94	673.146	1112.75	1323.07	1081.53	1010.17	1340.03	2553.28	2344.65	2918.09	3559.08	3119.23	1755.01	661.774
155	413.522	1441.02	293.009	363.481	926.944	559.158	585.519	618.004	331.22	1876.74	2988.08	1273.81	933.09	367	540.8	431.06	144.91	303.003	244.757	966.895	597.288	1250.83	378.919	286.799	1403.29	1134.22	1050.64	914.621	1877.74	1588.95	1193.47	1258.1	2265.22	1818.33	396.918	787.194	2748.27	568.176	1158.59	1154.65	712.935	2866.97	2651.57	2023.35	3976.79	2350.54	4251.28	4219.03	1950.67
156	676.793	455.897	899.911	878.349	322.145	160.625	574.592	624.871	904.314	618.995	298.081	711.298	586.585	615.959	1004.44	409.775	314.533	468.949	498.418	212.495	754.779	735.084	289.045	464.636	695.253	325.762	447.701	1013.39	808.199	850.954	905.249	144.789	220.539	817.739	335.819	248.335	671.159	217.723	831.116	661.403	594.37	947.751	576.824	441.483	1519.41	555.481	819.869	669.545	506.998
157	594.484	1161.34	386.128	677.827	390.23	270.204	977.74	518.956	2177.95	840.44	3874.93	1912.14	486.954	316.753	466.485	299.47	930.793	809.114	585.841	403.058	623.712	930.55	144.713	230.989	766.764	558.768	566.75	1264.39	1614.32	2144.52	673.889	826.818	804.999	880.265	763.788	1039.59	1490.53	327.119	314.068	1205.65	531.939	856.326	1803.3	2783.51	1573.4	2515.38	1439.45	998.936	795.242
158	537.163	738.582	521.862	434.61	617.822	532.263	613.975	700.745	670.45	1314.65	2455.63	928.168	535.982	334.772	670.205	333.223	209.61	164.375	326.207	726.607	861.462	1025.31	393.433	144.705	844.41	707.362	695.928	1199.27	2362.68	1750.99	1427.32	652.202	751.693	1024.8	486.24	375.142	2448.87	419.147	525.33	565.72	220.998	669.75	1192.26	959.015	1750.97	1239.05	1601.42	1422.83	614.06
159	811.611	2218.11	601.493	672.671	1439.63	804.725	407.529	1024.2	2767.45	1341.4	4792.16	1533.49	3964.98	1561.26	1995.1	704.314	891.05	570.446	983.414	1106.68	1496.54	1618.66	1087.06	144.618	2669.13	1239.87	788.768	1980.37	2710.6	1340.41	3065.17	2360.5	1209.4	2697	1579.06	2051.15	2348.16	1081.91	1599.75	767.979	1525.38	2713.22	4784.39	3851.92	4012.97	4776.96	2248.12	2874.29	471.518
160	464.364	640.087	309.085	479.061	248.194	329.988	532.602	1025.11	827.79	733.063	1354.51	1163.8	454.459	303.688	462.191	497.735	523.174	402.154	519.436	410.663	428.285	627.544	144.066	167.144	526.93	376.639	327.521	514.359	995.554	1171.88	630.826	466.314	403.933	363.63	230.623	156.116	833.065	271.004	376.494	366.553	268.813	781.89	1174.26	685.054	1547.16	1891.77	1367.03	756.783	638.551
161	925.571	1391.34	1062.52	867.529	490.719	450.574	505.424	397.387	1508.6	954.454	682.597	958.587	526.035	430.06	901.612	411.461	329.354	321.44	518.051	325.325	779.578	1213.21	249.567	143.844	631.126	437.901	642.683	1084.26	1331.79	1297.2	2155.08	191.551	205.236	1257.49	588.086	309.994	1213.74	290.211	311.174	320.419	731.268	338.007	1067.19	529.225	1920.71	858.301	767.857	893.306	228.396
162	1021.2	1234.25	677.459	796.984	500.84	366.14	745.532	604.557	1549.37	708.087	595.847	1038.69	618.819	373.794	827.775	457.56	332.975	250.838	555.056	424.876	843.206	1012.02	291.738	142.512	811.737	519.681	498.003	1000.16	1404.62	1243.26	1669.79	196.257	245.872	1011.69	507.544	342.25	1453.73	331.215	655.484	813.94	830.616	751.516	787.418	653.851	1214.86	805.066	865.534	708.484	623.771
163	372.914	408.401	298.49	370.239	745.255	462.507	561.558	731.071	504.215	617.321	1118.67	545.215	430.139	229.659	557.622	141.594	347.647	300.311	821.1	558.701	277.915	304.299	653.788	201.841	987.919	449.59	403.11	974.837	616.781	652.779	848.25	697.031	759.031	1381.99	423.951	1150.38	597.663	772.015	477.754	753.046	476.909	672.308	550.625	1309.25	567.464	1510.01	1399.02	636.865	214.049
164	397.515	693.29	850.106	375.185	746.41	640.849	742.974	797.336	2200.05	924.433	956.409	1314.51	829.996	502.895	1856.4	263.055	935.8	141.178	748.722	454.671	2109.76	948.299	1258.73	149.78	1994.34	444.815	695.086	1188.8	1560.68	2050.68	3563.95	1620.17	665.204	1558.55	1872.1	1579.15	966.622	1200.87	723.87	753.964	910.426	1538.53	2065.99	4578.51	2605.93	3324.04	3062.9	1239.13	653.131
165	942.737	1392.05	140.934	383.188	1101.73	704.314	937.098	1059.45	2804.95	892.737	3121.65	1081.13	1259.42	716.714	1296.02	2090.1	681.505	745.589	1589.36	1070.17	1562.3	1131.33	1011.7	308.714	2529.71	1688.97	907.191	3209.42	1981.18	1664.66	1347.76	1439.13	2039.34	3557.2	1510.57	2504.36	724.793	3200.1	994.229	1523.94	773.87	2160.84	2577.83	3337.35	3381.29	5124.69	5849.61	1855.89	868.736
166	528.881	1002.61	557.066	565.722	530.918	482.197	496.204	701.694	280.689	1041.72	1506.32	637.065	657.622	904.835	801.592	515.976	349.374	824.528	411.674	730.775	1157.26	1729.54	536.934	140.344	1205	469.274	561.359	1142.01	1479.38	1462.44	887.742	586.076	598.462	922.926	444.151	481.044	872.962	453.043	772.289	618.916	261.54	804.03	1595.32	1640.3	2083.9	1343.61	1651.42	1268.54	599.076
167	3125.16	1733.36	8848.48	5932.87	2598.07	2384.78	1582.81	1579.71	719.078	2476.1	4394.43	6091.35	2334.09	4388.3	3522.31	3504.68	2031.22	875.906	566.533	2440.97	1052.88	6251.06	665.294	344.106	6354.4	1193.6	1148.51	994.872	2339.79	1177.69	418.008	721.194	2067.44	4787.46	2197.09	1380.61	2316.57	140.053	1387.6	2904.04	1594.32	4636.33	8031.3	1684.42	4514.56	7026.61	3888.64	1879.67	2237.55
168	397.684	492.075	163.099	189.895	576.045	231.48	288.145	283.98	163.444	1151.51	1313.17	486.264	347.01	254.33	399.055	175.696	297.931	250.143	287.971	410.699	448.961	763.678	318.918	139.755	492.276	435.13	595.666	667.375	1492.8	979.316	983.499	707.489	320.164	545.119	418.985	320.697	946.656	282.714	624.793	327.575	187.459	574.163	1377.88	1257.37	1804.77	886.87	926.737	1437.12	499.571
169	699.931	1146.54	685.835	659.771	603.894	649.69	588.308	958.983	367.453	1465.27	2343.16	1042.68	789.981	776.885	1233.1	366.136	241.758	245.94	331.126	674.96	1068.03	1857.19	407.129	138.822	886.576	676.103	639.776	1011.92	2010.43	1387.02	1799.55	694.442	685.107	876.167	567.647	399.907	1707.63	469.718	1209.41	948.611	329.031	1540.32	3026.49	1579.35	3254.55	2204.81	2510.61	2208.14	1481.44
170	208.831	466.936	136.561	368.234	542.89	635.181	415.44	404.558	1423.97	777.914	1139.42	1001.03	400.027	332.265	926.224	410.845	582.774	470.889	823.462	534.141	413.394	291.479	643.515	230.255	882.227	295.815	325.475	912.242	728.702	1032.94	894.87	461.469	829.271	1167.3	413.66	909.212	409.389	839.758	556.197	646.556	446.679	1040.92	1379.53	1552.94	790.7	1279.38	1725.61	815.327	344.409
171	425.53	1064.78	378.419	386.397	882.264	509.623	241.331	787.674	1597.88	767.2	3221.46	934.921	2341.42	874.174	1193.83	422.416	643.367	422.298	658.825	700.619	808.719	901.416	874.943	136.135	1663.86	713.997	479.544	1314.29	1232.83	794.69	2050.4	1273.65	758.78	1894.38	981.67	1359.6	1376.48	705.616	1125.7	1105.84	873.236	1645.83	2908.62	2558.01	2378.14	3514.92	1721.98	1401.89	803.27
172	482.639	634.864	334.748	327.009	460.613	295.989	456.111	500.86	135.525	794.19	1859.97	497.358	544.435	496.534	766.931	206.551	196.699	173.825	180.206	379.798	669.785	1186.99	423.094	140.005	678.629	505.105	424.04	861.63	986.49	920.134	950.634	416.466	384.576	640.63	379.66	309.512	564.226	424.152	611.635	661.158	265	859.053	1218.68	799.14	1509.47	1236.13	1785.58	1011.47	895.844
173	262.906	533.386	133.305	389.266	401.135	458.569	453.479	878.496	870.066	788.161	859.866	747.389	415.801	355.253	679.98	475.826	214.173	387.949	567.288	669.702	328.834	384.076	453.118	168.235	765.69	253.743	271.956	554.183	419.496	674.196	760.521	445.027	497.664	565.654	467.353	684.852	309.233	804.102	461.585	510.389	241.037	800.586	1136.11	1242.99	926.826	1523.97	1405.53	639.14	312.92
174	330.404	668.054	349.227	245.723	559.161	455.93	361.274	388.165	364.882	1217.77	1996.77	898.59	471.377	344.031	449.169	203.42	132.656	145.358	207.213	553.413	313.121	675.113	204.16	158.879	598.686	576.244	593.735	1004.96	1316.29	1053.69	756.498	472.288	440.575	1051.25	216.415	359.698	1239.23	510	507.014	565.412	170.51	598.168	1449.22	1121.67	1302.8	910.595	1024.35	1361.02	636.655
175	977.555	977.144	783.719	1007.01	434.329	335.485	711.217	500.408	1676.72	792.719	641.09	1711.04	599.716	464.061	738.956	612.569	405.007	357.118	637.947	344.994	1220.57	986.636	277.939	189.732	993.928	640.606	650.029	1472.25	1760.12	1183.13	1613.88	272.003	401.774	1428.69	591.467	380.451	1519.32	409.433	168.831	225.251	757.399	177.118	915.558	920.153	1599.76	965.844	1237.34	959.159	692.594
176	216.979	761.489	168.136	245.225	621.629	191.314	344.879	505.882	364.536	1039.6	2290.15	521.468	1094.27	487.77	673.818	555.143	180.011	153.709	130.205	469.423	482.332	1042.32	327.604	186.846	348.132	463.966	438.623	517.407	1297	587.995	892.146	470.302	316.059	602.5	369.541	447.618	1013.05	310.216	322.186	374.396	184.425	267.837	1103.83	903.362	872.048	777.616	672.373	742.121	453.148
177	364.344	321.65	492.725	249.954	370.47	348.064	257.848	443.039	531.011	689.115	827.76	547.253	379.316	364.376	1315.89	227.708	738.585	235.14	335.652	427.221	452.132	561.087	379.137	129.009	609.901	197.101	227.528	9368.14	566.612	517.469	1428.56	640.074	216.284	5760.29	2985.06	407.03	399.089	405.339	444.336	361.723	146.36	707.289	1173.67	1056.22	899.735	924.242	914.939	439.126	363.139
178	1004.35	718.586	383.021	786.168	301.929	196.501	809.275	799.835	1468.51	616.57	128.514	856.513	432.517	409.276	884.971	357.321	220.641	390.04	540.205	202.098	1581.57	1090.41	509.81	128.235	959.319	1965.92	1443.4	1279.18	2192.97	2305.16	1700.21	228.982	426.516	1913.09	1019.49	703.461	1133.19	482.394	1425.84	579.018	2120.51	1348.43	1679.31	1274.3	2101.76	1715.13	2324.58	2535.99	619.732
179	409.996	307.894	146.908	199.875	349.435	373.536	288.049	364.136	726.096	487.654	745.184	422.824	412.371	307.55	474.335	498.25	217.056	250.435	356.822	448.193	387.345	484.734	427.681	145.253	495.101	194.259	230.004	501.73	623.171	515.513	528.909	308.644	291.632	523.306	235.51	420.46	409.465	375.42	381.564	397.289	142.354	660.278	482.605	473.116	870.506	609.955	898.663	235.417	188.623
180	265.168	623.434	148.604	231.305	355.356	262.205	267.814	384.021	286.228	1008.35	1314.32	586.655	550.539	409.161	315.84	736.575	220.041	300.526	307.689	612.57	631.207	687.459	342.655	211.123	494.794	340.897	438.489	690.263	1314.67	1251.1	487.714	426.46	487.181	645.004	267.793	310.394	682.722	287.671	451.132	127.205	205.63	459.279	1011.86	734.694	1502.2	592.582	1290.14	994.354	541.604
181	711.369	1650.22	375.985	826.183	445.191	439.151	392.266	167.834	1236.92	848.575	438.34	1540.86	354.709	490.304	402.197	372.106	126.666	649.216	383.878	587.939	842.835	1710.34	223.411	191.278	552.043	548.414	497.757	969.596	1229.58	885.399	1200.46	188.616	254.143	987.654	506.024	365.693	1029.64	268.079	1482.84	631.643	803.827	1114.77	2220	930.117	1996.8	759.183	1303.87	2396.82	1112.06
182	1132.54	1494.55	487.751	925.445	802.185	260.166	685.901	349.15	1979.88	529.06	654.985	1295.26	631.426	620.786	853.184	1238.03	244.326	230.348	780.585	227.119	2115.86	1471.86	489.326	126.514	1290.85	1183.87	971.541	2572.95	2554.84	2548.27	2739.69	349.938	579.423	1897.93	1113.35	722.707	1190.18	821.139	1071.8	1111.41	1590.6	939.352	1485.86	1677.61	1986.19	1689.08	2476.69	1206.61	822.354
183	909.104	1864.18	831.169	806.745	312.056	474.716	671.309	693.01	550.846	1690.5	2872.37	2878.86	406.646	427.056	688.049	235.119	657.12	1199.42	329.717	341.275	821.845	1227.7	126.421	223.143	600.991	449.962	780.505	1208.56	1484.36	1000.71	963.8	1244.9	1184.05	993.119	960.596	492.426	924.587	446.006	484.798	937.785	644.02	2200.8	3013.11	2893.43	3625.8	1052.04	1123.06	1723.45	2304.58
184	405.364	594.686	273.98	173.254	616.414	163.409	470.947	467.475	205.209	1130.76	2288.98	470.024	695.484	349.882	249.303	219.053	238.494	252.098	125.278	488.048	612.875	859.606	902.32	182.909	764.269	719.714	743.595	1558.28	2188.93	1925.33	733.383	702.441	825.909	1207.54	337.543	971.795	1494.6	757.786	467.791	486.947	292.329	807.778	1202.29	1713.6	1766.71	1571.53	3246.01	1740.2	649.066
185	784.907	1114.5	581.389	1152.22	326.446	199.379	318.254	250.129	373.536	329.321	192.832	798.954	579.961	545.696	801.789	259.214	285.346	193.796	302.718	208.379	734.136	1370.91	289.45	124.743	804.782	499.221	531.782	1021.09	1235.12	993.686	1239.52	199.118	262.846	705.729	542.3	396.85	724.839	270.829	931.011	935.95	827.682	1138.35	1216.96	510.836	1316.57	865.514	977.489	843.411	844.079
186	273.514	1185.44	124.53	145.618	505.736	259.907	460.65	278.29	316.208	1132.51	1849.4	821.995	352.215	317.439	475.179	383.308	169.624	209.006	151.651	365.406	751.667	975.157	480.362	212.823	639.769	642.092	570.581	1149.48	1297.67	1539.81	832.94	520.712	592.268	1181.42	361.645	503.593	983.817	528.713	642.135	263.251	296.826	930.006	899.414	883.045	1746.66	755.21	1556.25	1497.97	798.252
187	747.509	627.65	326.656	388.571	2973.81	491.906	615.607	555.501	1965.47	760.65	2881.99	1026.59	912.683	429.985	1414.41	248.994	936.548	271.565	1000.02	397.25	918.926	462.879	1424.32	124.343	1690.26	693.31	502.245	1602.33	799.212	1454.9	1419.83	1117.57	1668.17	1837.68	1131.55	1824.34	693.545	1887.99	684.994	1680.67	855.03	968.144	1653.16	4201.04	1698.59	4053.18	3456.51	719.561	489.033
188	619.712	835.947	827.462	896.465	300.07	133.261	794.09	338.955	2203.76	290.576	242.697	708.695	767.795	725.965	1253.87	2084.25	466.106	272.471	494.874	124.1	1594.92	826.264	1125.47	166.92	848.519	932.676	693.291	1175.31	2012.06	1774.42	2505.14	351.951	402.262	1062.5	941.85	516.439	664.411	688.589	692.511	689.464	1002.52	503.794	646.83	708.803	1585.38	1002.37	1282.56	520.456	502.494
189	232.637	390.299	145.663	240.117	278.495	304.74	251.881	461.488	355.173	572.229	781.571	481.411	624.213	322.22	576.964	308.524	155.938	240.731	320.11	464.995	258.825	301.443	336.285	124.054	563.79	148.91	174.295	452.099	264.756	398.833	653.393	329.025	403.305	538.021	315.861	466.175	260.273	399.156	422.808	420.883	224.425	928.206	1016.85	1040.97	895.893	1483.2	1106.97	712.063	261.72
190	540.589	757.296	123.639	204.789	1087.11	210.484	550.541	291.815	773.479	828.876	3441.92	644.334	1142.51	288.63	673.64	223.934	369.531	148.662	415.795	336.156	800.565	1026.18	878.316	162.718	714.765	1164.15	1033.6	1691.2	2671.17	2138.5	1101.68	1116.79	630.58	1441.28	738.653	944.866	1206.98	852.29	563.474	902.074	371.936	587.749	1225.3	1577.62	1798.85	1637.53	1641.11	1341.61	688.366
191	267.805	605.654	521.94	702.362	346.429	218.256	680.804	539.596	407.24	508.627	954.885	714.354	705.146	560.894	502.006	190.493	372.305	409.082	493.039	405.374	658.738	398.325	222.515	212.825	476.713	456.98	374.889	647.974	1031	885.612	722.676	614.067	484.656	764.431	436.746	402.054	720.087	258.544	123.055	560.218	295.446	416.086	679.324	1113.88	670.821	954.562	641.973	352.61	216.558
192	760.14	637.545	275.681	640.455	605.764	285.77	848.024	944.525	2872.49	1078.84	277.77	1595.12	339.939	324.94	913.518	487.791	381.239	572.839	866.659	167.86	1535.08	854.806	552.742	122.549	1280.46	515.575	701.535	1296.17	3304.85	1705.17	1196.29	351.665	450.415	646.145	1186.72	688.659	1041.87	643.768	924.036	450.081	1167.07	790.271	1425.38	1126.46	2369.6	1126.1	904.656	1448.52	486.311
193	279.826	298.558	256.424	227.411	391.117	407.624	238.523	423.202	563.3	655.224	783.54	517.218	372.742	304.494	410.783	283.621	223.783	249.95	327.364	489.513	289.306	353.34	396.837	137.585	575.692	206.983	205.402	391.977	563.161	663.32	676.231	314.226	355.708	512.727	297.087	349.983	563.399	358.999	388.621	280.492	166.549	555.354	678.892	791.169	849.451	1005.3	934.682	484.485	228.106
194	398.219	671.133	145.184	325.897	522.359	591.99	337.141	1146.92	533.732	973.975	1886.54	810.033	517.025	779.872	874.01	392.931	319.831	276.257	516.622	749.739	545.269	769.259	701.133	121.135	1292.76	144.881	262.621	849.111	649.153	708.398	1395.11	412.446	406.318	1009.1	581.41	734.289	488.438	798.383	794.888	483.418	315.949	1227.52	2224.05	1711.62	2175.86	1742.18	2447.01	1267.99	456.294
195	299.524	620.041	167.974	253.56	693.215	303.785	419.199	305.815	370.115	1044.09	2211.17	688.22	713.576	384.71	499.221	268.462	188.21	153.121	344.003	504.584	483.771	682.783	343.522	120.76	619.924	752.999	752.094	992.244	1661.78	1361.72	784.044	608.471	509.233	771.991	353.03	508.254	863.362	575.516	650.81	725.119	259.813	629.471	1189.05	1318.38	1601.68	1299.86	1489.46	1219.9	691.92
196	480.907	488.65	286.561	257.832	365.307	212.007	180.95	289.964	294.589	755.714	1050.8	465.939	395.954	270.679	487.996	123.875	175.439	238.575	191.961	367.404	775.129	1342.17	321.211	206.582	559.779	354.429	303.114	506.639	805.321	622.157	555.325	330.036	270.093	555.854	237.546	191.793	944.179	216.721	461.482	366.132	120.457	872.711	1138.1	1138.55	1654.34	883.196	1324.33	954.732	417.368
197	624.112	592.245	752.44	444.318	699.207	644.309	592.449	665.982	853.579	1478.35	1954.72	1024.3	430.54	259.906	572.47	441.694	123.393	120.204	375.983	960.169	643.509	810.174	225.631	155.959	378.986	331.337	379.137	432.716	889.069	681.874	456.378	361.025	292.598	506.67	229.631	142.171	1674.89	165.595	216.516	211.039	132.395	254.461	129.52	297.855	476.731	420.996	444.488	397.103	313.64
198	982.624	895.054	370.109	754.165	291.452	185.787	1058.64	383.318	757.466	440.97	2964.83	1736.59	385.015	410.697	724.304	536.449	409.226	331.945	339.313	271.814	770.375	672.571	277.676	120.118	1680.09	715.916	1020.68	1951.3	1909.61	2232.61	1247.62	720.301	1396.65	1213.28	866.319	738.16	750.134	858.558	538.664	2016.76	377.396	444.061	1948.21	3439.82	1532.01	2472.86	1141.86	610.3	616.433
199	425.277	520.401	124.491	227.545	434.45	297.216	418.585	304.32	1691.47	589.579	1617.55	594.594	682.394	358.765	677.816	218.724	329.183	283.501	921.362	343.809	739.371	459.13	671.68	119.93	495.848	339.077	426.631	1024.22	588.88	1015.68	671.438	686.429	954.304	1065.87	484.401	1021.45	331.548	1094.28	443.863	726.278	470.655	738.63	837.569	2244.44	1048.2	2539.85	1988.68	626.714	372.386
200	394.818	422.436	134.766	306.399	596.372	355.954	502.314	382.835	776.141	470.244	1224.29	582.281	437.53	501.76	742.447	801.046	300.186	308.984	405.259	482.231	723.981	327.264	626.816	119.7	815.295	233.431	230.095	679.23	394.7	740.371	739.34	274.489	636.335	929.914	334.581	646.201	554.254	829.829	349.544	667.335	297.308	608.438	1052.48	1217.94	619.72	1599.52	1647.3	459.613	279.101
201	687.494	3564.9	295.771	1124.52	395.399	713.805	296.235	800.84	452.015	1454.51	131.355	2911.41	772.762	1209.07	386.169	224.393	161.16	218.955	141.89	742.285	569.177	1985.95	153.169	119.507	674.702	435.563	1030.45	667.519	1763.24	1062.72	1513.53	385.236	541.905	1346.58	959.055	376.6	391.361	523.046	3628.29	836.189	1584.62	2507.94	4493.08	650.45	3145.49	947.537	2020.31	3332.93	2840.88
202	405.726	1458.73	118.446	349.619	685.573	473.658	520.474	355.236	458.645	1866.99	3191.34	1140.64	946.275	795.302	400.256	1658.42	549.656	785.849	383.015	1067.07	854.861	1391.55	1000.05	496.924	895.076	968.05	1114.24	1582.27	2567.94	2939.2	737.104	793.901	910.004	891.936	520.771	624.581	1122.26	1096.78	1087.06	865.243	290.402	1149.41	2309.03	2098.1	2741.41	1874.91	3328.11	2330.59	998.269
203	214.333	528.321	118.253	324.224	270.402	426.488	292.095	414.41	473.135	648.997	831.625	526.092	455.741	468.623	531.424	220.146	135.424	319.99	335.678	526.669	443.142	375.915	270.89	126.001	679.426	190.119	245.261	445.178	435.519	533.497	883.449	568.819	516.985	678.779	488.846	578.554	309.475	680.4	551.486	472.479	368.181	914.577	1335.04	1118.97	1064.01	1892.01	2029.02	982.229	397.873
204	445.237	601.611	592.667	747.132	283.515	170.462	392.021	399.323	428.174	347.026	287.418	671.689	467.149	405.582	525.99	289.345	171.952	210.227	311.431	118.168	570.018	654.092	146.682	121.445	644.838	351.26	319.668	773.089	927.512	668.056	732.526	140.973	169.031	816.937	307.399	210.377	772.882	182.308	137.304	150.874	271.411	267.777	408.17	281.921	533.252	403.265	442.077	450.198	120.483
205	924.518	1117.1	476.048	681.244	345.946	252.399	680.987	862.224	1104.57	805.2	2307.96	1203.12	689.372	564.15	621.174	349.569	598.888	446.832	441.036	459.668	1085.08	1056.47	352.38	118.16	745.3	673.216	456.265	813.446	1358.65	1191.84	901.413	449.411	594.811	880.974	549.839	365.59	910.906	376.863	353.595	975.22	449.004	1170.82	1672.55	1702.28	1241.01	1757.8	1235.87	763.241	805.435
206	1060.01	1014.41	1032.91	634.916	442.804	338.459	694.563	767.575	1150.62	736.155	1775.47	1973.43	527.074	472.204	703.944	201.386	939.383	356.084	631.98	404.15	674.93	1172.85	423.119	116.901	348.335	541.293	581.669	448.999	850.247	2630.92	2501.4	1055.45	462.286	918.798	665.648	587.58	850.534	407.416	362.733	824.4	578.023	466.613	995.293	1134.49	1360.14	622.824	1222.61	818.805	826.306
207	465.839	513.066	116.813	303.54	339.115	280.521	354.789	433.229	1797.32	528.569	1151.74	575.544	418.89	328.754	544.864	503.055	496.348	387.212	709.551	443.147	520.854	334.454	762.92	141.512	945.441	433.421	432.594	936.028	788.572	998.631	848.451	555.974	704.065	896.087	720.366	807.971	447.614	905.706	517.529	990.572	380.149	740.009	1426.64	2058.2	1031.31	2621.69	2964.58	561.086	355.142
208	645.484	1700.93	218.151	461.675	484.147	317.764	860.322	385.56	1229.62	584.736	3481.22	2148.26	506.863	337.863	613.694	122	389.55	397.74	382.363	445.827	970.916	854.928	387.325	115.6	873.651	930.072	700.895	1229.5	1402.84	1757.95	770.25	1051.12	983.094	943.554	499.369	669.981	914.947	600.31	522.265	1448.55	649.29	1387.74	2874.64	3227.86	1866.41	2848.09	1064.57	1542.34	1190.99
209	444.705	609.648	178.25	360.485	432.007	518.961	519.306	439.924	801.936	684.869	1433.07	966.964	403.504	796.201	758.95	961.039	369.049	269.064	406.652	595.029	268	422.318	351.447	115.214	1270.28	180.826	226.264	793.12	494.649	932.351	969.133	331.14	759.316	653.717	401.16	560.683	461.31	829.09	551.482	1007.78	273.841	476.007	1483.67	1396.14	1257.76	1126.8	1673.07	350.539	344.25
210	1118.51	1340.75	407.654	753.197	367.476	206.507	1293.72	1021.02	985.832	488.449	2512.33	1305.51	517.087	346.914	1012.33	238.671	436.789	340.249	559.864	331.882	3063.24	1635.24	209.196	115.193	1335.13	773.436	983.525	1471.25	1850.43	2156.27	2267.58	1446.87	764.01	1312.08	1728.74	839.971	782.745	942.148	392.149	1280.01	588.659	1383.69	2892.32	4605.06	2412.89	3105.97	2414.62	1521.16	900.821
211	178.303	244.911	139.208	241.813	289.105	273.82	119.518	317.917	136.333	281.779	681.696	396.101	342.589	336.108	304.713	187.421	268.203	331.747	219.786	284.782	219.614	382.796	448.913	114.953	632.268	131.208	134.186	375.333	257.55	223.079	326.391	217.258	228.568	438.575	162.322	260.929	220.842	321.616	344.016	253.513	145.497	637.022	716.928	549.017	622.529	780.28	803.183	462.07	210.349
212	264.123	317.278	421.716	415.133	314.328	317.853	223.744	344.32	372.431	424.045	582.859	304.203	411.241	385.825	620.556	196.539	326.458	259.002	351.586	444.559	327.05	468.034	243.98	114.894	485.913	219.861	249.577	386.58	505.48	472.352	439.125	419.748	295.623	578.014	271.053	404.658	447.883	279.03	423.453	267.18	200.545	802.127	901.609	702.6	1902.14	2795.34	1148.23	603.144	402.413
213	468.496	494.354	121.196	188.667	754.021	306.4	332.238	374.333	737.067	516.4	1010.99	542.483	773.904	298.7	878.904	251.792	352.008	396.292	675.712	368.671	538.596	624.212	799.229	121.871	1282.23	273.85	435.146	814.675	598.096	1168.85	911.154	757.058	819.938	740.396	649.417	1255.98	521.462	775.917	723.033	765.163	315.196	979.487	1769.12	1574.96	1712.03	1889.33	1490.83	845.237	439.146
214	507.63	1000.49	494.808	592.408	235.705	171.335	359.805	322.564	720.755	602.119	270.935	627.495	339.819	466.415	652.006	407.706	236.637	275.152	283.006	222.271	516.226	944.17	402.402	114.54	581.999	438.224	546.087	667.418	1133.83	788.359	1380.15	300.465	208.591	458.163	527.695	261.738	537.785	216.507	1144.3	570.394	726.046	685.443	1375.14	857.441	1985.97	615.966	1518.78	1073.38	637.419
215	497.664	492.989	282.321	254.839	630.106	400.209	578.365	446.065	299.733	998.622	1684.76	588.219	582.715	354.015	498.074	121.104	168.725	114.409	241.054	562.081	671.112	879.747	365.016	170.24	430.21	548.869	532.715	848.482	1104.76	1149.2	966.443	482.447	1495.75	771.736	379.837	390.656	888.153	347.799	453.668	587.075	247.539	637.125	617.826	589.938	1048.93	1015.56	742.628	847.515	496.181
216	405.555	375.12	114.225	314.721	501.293	547.586	284.473	580.44	679.491	687.92	1068.79	561.197	508.899	333.378	838.971	402.484	227.445	245.291	441.339	630.352	438.269	556.654	512.831	171.149	634.576	248.623	240.01	500.24	552.344	526.793	619.976	323.134	370.414	561.24	282.229	513.34	564.039	440.556	504.531	474.647	186.889	876.424	858.122	1076.42	773.754	1250.02	1325.01	532.694	370.215
217	178.702	236.593	117.673	169.351	527.337	382.905	216.131	525.061	342.327	463.52	1039.63	429.601	254.118	225.125	397.645	258.358	244.964	328.631	547.744	578.254	229.454	375.943	311.168	112.724	454.043	169.886	134.101	618.304	562.288	299.825	399.264	356.202	248.03	558.611	295.564	326.795	564.71	459.207	485.337	374.533	246.18	627.414	1056.15	545.885	800.534	1136.89	1651.01	723.778	279.724
218	729.111	756.245	443.421	356.267	403.859	367.975	803.496	552.8	1230.73	721.156	1768.82	875.6	647.965	381.503	411.126	290.341	336.316	455.906	510.746	644.879	650.09	871.134	269.329	231.581	468.801	377.003	262.265	536.369	900.896	800.465	842.279	478.267	300.462	585.918	350.68	214.599	627.904	177.436	191.958	538.183	219.166	350.166	662.342	670.584	922.316	698.974	616.806	200.251	336.251
219	680.425	767.601	209.039	438.563	304.842	203.987	483.506	760.855	671.119	465.1	1258.46	975.177	260.406	392.776	474.402	176.173	324.674	383.081	380.844	414.961	933.277	876.545	295.802	113.123	561.249	612.661	583.427	896.764	1231.19	1175.98	844.076	513.318	499.13	558.042	472.937	298.451	542.127	371.236	347.938	581.589	216.893	530.258	1365.32	1514.99	1648.81	1335.27	879.098	613.413	546.667
220	435.701	361.869	222.069	298.11	452.638	552.577	194.408	377.849	796.662	696.596	965.78	666.988	412.315	373.742	609.983	343.508	183.089	217.094	339.623	700.102	363.257	498.981	347.906	112.035	702.806	254.661	266.314	543.396	523.794	548.726	612.993	292.496	358.252	666.274	329.318	415.473	724.455	427.305	523.464	396.755	199.827	908.461	644.514	700.264	858.875	1090.85	1015.47	549.99	244.118
221	673.86	916.304	111.965	240.411	515.631	351.75	347.686	311.936	697.026	1310.45	1997.75	1000.86	458.289	322.675	663.85	333.065	340.418	505.773	309.82	776.445	741.95	1271.76	678.642	497.199	312.344	344.292	320.026	577.473	1152.12	798.488	990.026	420.683	425.892	478.523	288.654	262.932	720.635	246.205	673.58	621.162	216.582	738.033	1549.72	875.783	1930.95	1026.76	1085.66	1332.72	991.389
222	483.724	544.565	520.266	391.033	218.205	227.691	500.629	739.73	414.026	549.799	1261.92	776.745	687.544	499.911	491.039	168.664	277.999	380.315	356.48	480.446	405.918	591.945	193.294	111.659	571.456	343.207	324.864	526.428	933.933	777.959	999.604	445.211	339.368	743.783	413.731	226.255	567.136	206.97	309.09	658.52	242.99	1023.02	1146.94	988.959	885.89	1128.24	675.394	546.217	677.454
223	385.582	617.053	179.17	301.834	712.765	572.071	488.65	571.471	1444.43	1071.03	1486.7	695.901	864.369	627.79	1169.8	694.492	642.918	582.295	502.836	804.501	831.981	761.023	589.199	178.37	1378.38	264.03	435.019	1185.37	769.046	870.045	1219.23	643.676	694.531	514.409	641.724	842.717	652.28	926.938	384.387	308.139	350.149	672.01	532.991	718.431	885.011	1030.03	1056.82	267.976	149.701
224	276.527	987.524	1129.36	510.678	639.447	504.554	264.956	448.751	249.274	1625.44	1201.18	1311.25	649.577	636.445	760.949	525.668	523.505	111.323	170.167	614.831	183.507	1256.92	672.554	166.929	436.144	429.204	667.918	534.551	1430.35	1458.85	2876.95	1448.87	225.654	871.357	471.327	278.556	821.145	225.54	1205.65	415.004	242.436	952.619	573.125	843.749	2790.83	964.222	566.739	1767.67	967.197
225	833.994	1485.97	235.012	587.931	220.861	231.32	621.901	488.332	750.565	472.814	1066.67	1628.97	470.572	417.095	452.02	691.18	372.139	539.796	392.871	271.601	1296.43	1147.79	183.836	127.98	375.565	495.534	425.554	771.359	858.193	1365.33	492.772	417.994	576.227	368.396	500.766	365.29	511.109	381.762	111.061	676.15	217.819	653.31	1346.57	1175.71	1102.48	1357.18	662.622	339.456	536.579
226	875.305	974.258	578.805	656.387	403.529	270.745	1418.36	1761.14	1325.38	721.332	2652.71	1324.49	543.683	597.463	786.508	309.218	584.897	492.7	815.817	512.558	1895.91	1213.74	404.65	110.83	1531.32	692.678	960.053	1788.05	1711.16	2804.29	2138.53	872.824	948.796	1595.87	965.097	713.153	977.784	796.058	862.321	1417.82	576.166	1119.27	2122.16	3179.05	2000.88	2168.33	2073.57	1029.33	1349.56
227	262.315	301.223	274.193	363.411	500.845	411.336	387.44	568.06	247.963	434.219	501.492	349.771	348.281	246.675	784.521	347.123	248.637	214.781	481.145	361.402	290.229	380.967	284.467	110.812	816.285	320.681	266.712	632.021	452.99	501.101	610.395	486.735	529.918	921.296	317.738	639.383	443.29	607.443	360.911	488.401	421.774	520.881	568.662	906.981	499.361	989.158	887.418	353.864	200.869
228	771.331	1042.67	1278.78	201.796	1348.65	280.619	494.277	852.859	477.805	1087.03	2634.76	760.134	1266.82	249.94	1214.4	165.947	753.956	124.966	325.965	551.189	735.344	1571.58	625.869	110.479	367.496	926.12	1011.76	1378.59	3040.24	2631.39	5519.82	2652.23	284.034	2614.39	1025.24	537.795	904.701	566.957	916.159	1227.95	465.77	488.926	1701.73	1690.38	1696.64	1621.81	1083.05	1375.32	1003.44
229	591.087	1793.95	211.473	870.359	326.671	266.723	549.074	336.696	814.73	556.518	267.4	1522.94	464.038	608.974	378.413	1196.98	110.108	328.019	358.494	267.575	736.428	1272.86	341.233	115.953	1379.78	329.688	707.237	1027.2	1223.96	1386.87	890.183	235.734	461.481	823.678	693.356	394.197	566.191	371.936	954.185	1107.46	600.416	912.077	1347.36	968.452	1871.02	992.806	1100.01	1240.1	644.18
230	314.911	378.826	109.811	198.746	496.015	362.369	277.754	324.082	221.041	533.349	1132.54	536.081	552.852	363.724	618.663	201.735	157.94	168.947	393.765	505.649	333.639	494.504	346.734	140.408	715.369	240.845	270.063	555.033	328.863	549.846	644.025	589.649	415.236	609.737	302.243	656.086	360.835	535.224	610.53	478.249	310.457	1026.4	1041.73	984.509	830.24	1446.31	1168.42	752.827	467.711
231	432.32	995.143	972.666	686.263	503.514	350.204	602.993	309.302	227.643	833.682	1137.72	1445.64	416.409	339.945	670.03	109.23	610.204	246.321	146.713	425.157	605.914	1433.45	764.041	313.043	412.823	462.593	465.668	309.83	1077.01	1647.62	2431.34	675.67	335.923	502.202	508.788	431.262	449.389	288.295	589.434	473.748	235.002	664.295	768.829	607.161	1356.2	1307.99	923.943	1414.43	1120.5
232	422.692	472	143.021	330.075	151.162	154.863	484.804	349.167	399.258	538.517	915.575	774.454	513.721	329.333	405.467	280.358	301.708	344.892	235.821	342.113	730.433	537.171	191.104	109.108	782.975	363.167	478.587	538.313	1221.55	1127.97	979.275	518.554	555.188	706.417	505.262	367.779	644.579	315.392	434.808	661.55	211.804	897.483	1068	1414.31	1236.32	1298.02	597.258	562.625	595.992
233	467.613	661.383	224.285	320.882	619.015	777.457	519.654	597.389	1180.26	994.021	1383.54	844.208	591.114	322.061	722.258	219.31	224.302	305.26	601.195	936.438	336.365	581.929	353.993	169.368	832.027	405.912	448.011	813.927	789.335	992.238	1395.85	886.319	715.02	878.64	374.755	796.045	881.374	530.04	784.024	155.976	334.374	1362.13	1411	988.438	1228.53	1626.43	1789.3	1416.96	323.539
234	177.937	196.801	112.356	145.156	287.054	376.971	143.957	375.09	552.565	404.581	741.222	592.728	426.097	169.676	363.11	122.013	316.679	264.349	387.197	430.59	217.126	357.218	1015.75	151.574	752.804	199.615	232.532	501.318	366.457	548.675	1140.43	425.659	338.99	808.404	284.443	404.499	184.041	418.199	525.328	391.415	330.549	558.074	711.069	563.776	871.704	1184.97	747.157	362.6	243.721
235	1152.96	1012.45	438.609	920.466	381.241	167.16	576.186	227.71	1085.33	327.68	354.809	1129.93	528.414	614.059	698.945	1751.77	505.95	238.464	449.001	117.741	1181.87	905.426	515.815	108.505	1411.18	818.726	847.195	2411.51	2029.52	1951.86	1918.93	207.146	493.21	1691.81	703.786	640.246	1292.18	681.783	718.29	1423.12	401.368	446.734	938.519	1195.43	1396.45	1397.85	1745.44	586.599	660.55
236	201.569	362.183	108.289	185.295	325.788	345.964	296.915	415.803	723.801	570.949	1934.47	600.234	364.08	322.71	751.068	451.777	420.441	364.623	411.478	463.031	294.488	350.029	785.523	132.507	788.406	337.536	229.525	615.735	575.891	561.96	529.913	763.656	470.149	826.04	236.325	479.509	635.844	918.77	450.201	540.601	405.549	1016.93	1300.83	1226.07	982.766	1578.59	1889.16	761.138	459.436
237	542.342	524.131	148.897	246.939	975.894	391.128	429.431	489.564	886.544	630.739	1257.12	696.686	963.944	414.469	1084.54	290.65	379.15	501.739	923.211	465.989	628.5	650.883	932.056	186.675	1825.89	354.158	523.542	935.256	692.622	1431.85	1022.58	889.4	1069.77	894.503	819.331	1515.63	602.564	932.611	776.1	921.639	415.569	1081.54	1780.98	1815.29	2069.18	2336.56	1853.6	935.872	547.881
238	239.874	539.849	291.904	205.428	589.654	306.184	261.521	236.644	107.434	903.534	987.35	475.145	645.039	410.041	339.05	129.447	322.02	488.211	258.58	468.717	501.077	854.874	505.709	360.837	750.097	496.08	510.108	1029.22	1058.15	1028.51	630.71	494.188	421.565	1054.15	244.715	266.084	999.919	319.959	443.795	131.798	211.585	625.548	203.554	343.738	791.979	282.31	1109.52	736.666	308.094
239	494.241	897.568	170.946	542.176	270.663	206.929	409.199	233.176	974.821	267.577	353.946	899.778	294.624	404.425	430.007	1296.71	204.829	211.441	293.296	159.311	684.788	665.09	341.464	106.796	652.614	657.938	491.06	1755.61	1085.8	1013.02	719.586	143.033	220.6	1047.27	452.215	430.408	673.829	509.204	447.871	447.615	485.707	718.416	821.475	511.195	1179.92	723.736	1407.45	604.064	427.874
240	260.717	288.179	195.311	181.115	406.531	294.621	184.218	216.784	534.039	446.866	765.989	463.189	283.491	244.331	421.706	116.724	233.74	175.409	238.338	302.753	337.642	342.315	352.361	106.729	383.119	145.78	126.505	287.611	366.697	499.743	725.763	294.66	309.325	312.105	197.909	418.385	350.751	380.413	205.688	252.761	209.94	301.77	701.209	599.793	578.758	718.496	862.724	279.86	262.295
241	335.633	423.54	177.413	244.327	588.624	286.539	560.804	265.313	2679.08	614.725	1836.37	531.514	414.507	458.379	1022.41	1418.08	524.502	251.052	891.742	356.445	814.071	407.989	881.765	105.963	1611.38	532.973	394.213	1775.2	1176.89	1298.92	1203.94	542.642	961.393	1589.44	567.881	1263.51	632.906	1501.58	336.848	957.933	476.285	431.71	1100.41	2405.74	719.526	1789.15	2374.31	357.78	286.746
242	509.175	578.435	447.458	539.452	292.148	223.924	402.157	270.867	959.211	529.549	385.955	748.29	289.888	198.383	379.604	364.27	145.956	158.186	349.901	274.08	571.92	485.586	114.414	105.906	342.214	243.349	246.552	508.462	739.682	402.701	562.295	120.99	155.745	498.62	221.668	141.507	775.938	160.344	373.321	341.873	302.705	432.286	473.926	321.815	655.754	346.044	655.758	539.414	268.24
243	166.804	370.304	150.416	268.521	264.586	233.201	309.821	301.452	320.363	584.605	574.926	394.234	251.042	199.387	514.783	343.991	185.755	309.887	282.471	399.967	237.08	259.76	679.85	134.831	415.217	321.1	229.461	403.76	497.189	737.176	890.911	664.375	451.863	452.836	294.446	616.735	430.77	452.425	279.741	192.866	114.626	661.951	903.63	1731.06	764.063	1235.12	772.008	746.67	295.822
244	357.392	477.551	236.62	346.382	426.697	353.095	407.853	668.923	956.651	787.446	1250.08	658.068	531.264	389.105	649.528	300.3	454.669	470.839	564.606	587.1	548.659	604.95	454.065	105.13	1023.44	261.568	328.029	991.553	649.929	757.031	952.921	672.095	556.586	960.607	499.586	861.71	483.034	841.321	519.568	515.985	253.764	762.857	1640.8	2031.14	1005.66	1800.1	1743.53	832.721	347.665
245	475.279	1648.46	209.219	576.64	464.31	1453.34	214.583	1849.62	503.652	2510.98	334.965	2679.89	528.863	1422.48	633.223	608.627	194.148	373.1	179.119	1605.62	271.712	1513.12	118.083	212.962	343.977	149.652	348.529	289.831	473.998	597.594	739.273	663.108	436.238	472.146	364.579	287.398	362.34	282.715	1723.45	226.8	196.512	1263.4	1094.67	541.352	1811.19	453.288	656.873	558.246	1002.08
246	267.392	267.808	1292.53	1277.3	435.248	682.426	523.237	3801.64	1188.4	914.423	675.575	1479.9	213.564	580.721	1512.7	134.729	941.014	246.533	359.284	473.71	727.727	888.594	1202.24	128.821	1140.88	941.55	543.778	104.574	1137.58	2734.14	2316.42	658.872	488.621	623.051	439.005	639.82	823.98	149.273	429.221	273.433	398.305	475.84	1353.45	1246.39	2502.6	2955.9	4323.69	1104.07	266.286
247	395.923	688.195	497.029	595.036	259.029	201.045	461.156	350.967	1377.34	467.48	439.514	920.849	298.253	314.559	538.131	813.61	167.8	165.465	232.178	166.048	517.913	590.426	265.47	103.948	554.982	437.363	366.735	853.609	1090.81	937.352	1392.14	205.949	240.049	769.621	620.761	294.191	706.548	182.298	521.921	442.322	564.046	546.409	940.05	278.527	1217.76	583.481	952.48	749.872	361.259
248	219.539	342.2	146.41	199.333	325.498	329.024	224.551	267.533	493.179	496.766	486.181	542.089	316.908	255.406	286.721	234.701	190.226	179.534	297.994	406.329	189.268	315.748	228.94	125.881	277.401	188.458	183.414	343.679	497.479	446.248	483.055	333.115	242.218	387.909	173.018	302.688	398.92	273.777	312.077	264.124	171.012	412.17	722.935	433.707	522.195	573.109	498.757	454.676	273.289
249	552.659	2314.95	137.971	987.799	584.732	2030.88	228.286	3886.99	404.319	4322.88	416.171	3552.98	632.746	1872.49	636.024	183.621	185.322	412.072	230.691	3034.69	188.366	2417.88	182.001	163.609	332.361	103.426	339.771	329.869	448.474	413.325	471.479	812.821	287.174	779.639	505.99	219.72	250.281	228.029	2689.2	500.425	335.69	1765.18	5832.32	846.975	2517.47	867.55	686.536	1931.14	1627.27
250	403.318	1049.42	933.174	751.379	315.736	219.507	282.671	458.188	699.125	618.532	199.99	1311.31	343.496	470.712	738.405	387.886	381.594	173.188	275.332	175.882	385.621	1732.65	107.261	104.564	423.186	264.342	418.971	731.714	886.294	492.587	2475.89	401.952	163.831	675.186	530.694	173.964	676.507	103.373	939.604	596.315	591.761	443.642	1686.53	701.504	1778.61	407.746	699.479	1000.25	565.981
251	672.084	676.609	103.271	252.734	1206.52	314.366	682.309	559.272	674.514	598.695	8554.41	1047.77	1122.17	336.318	1429.16	369.668	305.158	241.613	534.893	571.536	577.608	593.888	836.192	178.141	1140.8	705.3	507.176	1041.39	584.575	1067.3	854.342	1188.11	1713.21	1354.42	480.795	1555.68	1478.56	1618.32	966.536	2074.51	1377.54	2034.55	753.711	1179.57	995.936	2736.94	3601.75	1269.84	719.983
252	284	501.934	102.993	277.744	297.663	373.596	445.37	417.825	861.381	606.391	1358.49	752.313	539.561	574.399	651.645	1272.95	310.798	456.219	624.145	494.906	1032.82	348.327	691.554	168.269	1384.12	425.176	389.007	1312.31	743.742	1500.48	669.979	416.946	1118.26	1133.67	632.908	1458.38	744.216	1734.63	342.295	721.444	200.504	702.558	1402.88	1765.7	903.742	2884.34	2619.42	585.403	342.811
253	765.671	669.98	432.498	405.677	209.265	182.481	443.18	371.77	407.451	426.05	1212.82	634.787	541.299	380.464	531.988	179.233	287.911	294.443	289.596	280.492	615.998	944.913	143.361	102.18	468.685	363.793	276.624	506.973	752.437	741.24	733.53	396.154	260.214	597.231	412.688	291.471	405.774	174.449	188.826	526.551	230.069	957.696	1145.75	1143.9	1218.06	1287.79	933.358	506.307	652.077
254	242.255	443.855	330.892	236.391	407.716	500.587	179.63	417.096	424.526	626.126	751.325	864.857	340.384	313.341	785.788	224.281	546.193	229.574	199.886	395.433	125.272	490.291	609.947	101.963	345.351	208.131	245.705	321.885	517.966	514.834	1748.33	759.159	304.705	526.416	297.734	438.891	350.369	293.776	674.48	553.56	307.245	881.631	1394.54	545.376	1288.06	829.766	784.82	773.729	395.261
255	1039.93	1099.17	635.582	843.058	544.342	319.184	697.571	483.452	1544.1	630.939	735.719	1613.18	723.815	505.11	1042.53	863.62	305.446	185.44	591.515	300.555	1030.53	1001.02	470.625	101.081	894.684	773.51	624.636	1620.77	2067.53	1394.85	1574.88	241.191	338.063	1055.73	899.033	495.354	1080.44	514.592	891.614	1053.23	1274.99	948.649	1029.47	768.763	914.602	1171.62	960.893	776.709	646.976
256	342.054	411.085	390.156	373.298	391.429	433.684	428.036	547.939	384.141	737.513	1447.17	534.111	322.01	212.025	446.709	219.111	116.603	126.116	213.135	502.988	425.579	573.724	189.137	116.594	433.731	308.076	273.702	578.227	1184.61	731.785	737.826	348.262	388.04	591.793	234.494	217.834	1177.82	207.688	226.116	229.479	107.376	354.337	626.201	495.269	813.785	557.304	826.321	784.336	315.891
257	218.799	395.546	183.726	205.716	259.875	256.36	235.503	201.63	230.755	923.821	695.607	569.534	271.086	215.593	258.991	140.619	283.744	221.566	113.458	419.424	248.714	671.79	726.209	143.571	331.031	248.184	274.452	404.879	761.384	778.538	869.168	339.546	200.859	407.353	177.316	264.478	480.74	184.029	501.71	331.161	117.07	399.933	921.755	708.952	1675.12	581.648	623.477	1121.61	366.391
258	369.921	237.296	123.11	134.665	350.574	324.959	278.478	223.875	576.176	369.87	653.089	364.39	289.056	179.606	564.079	369.724	375.387	218.821	442.926	373.652	233.421	307.655	439.791	100.82	391.544	231.25	245.438	561.215	396.399	396.374	401.591	394.986	385.174	403.964	187.134	405.387	215.741	641.769	338.904	422.78	252.871	301.058	330.08	514.414	476.248	572.939	1728.17	173.92	189.15
259	316.743	463.406	315.35	281.316	391.662	254.388	383.259	413.031	183.306	659.888	1062.75	395.293	545.974	376.584	736.368	253.387	126.594	151.291	179.257	382.834	446.296	679.057	279.194	127.125	352.376	233.596	261.775	439.231	752.482	575.353	659.975	233.099	254.231	410.96	205.754	169.35	652.21	252.565	291.694	100.79	137.693	358.068	303.394	578.913	632.018	396.5	324.057	408.443	429.463
260	913.168	1031.03	141.783	143.832	139.161	100.033	107.26	105.458	736.85	608.329	594.886	538.349	145.69	7421.34	1086.51	1209.57	264.722	290.783	168.508	197.385	1181.3	1308.32	168.55	140.969	994.719	361.587	418.559	1206.27	821.949	837.39	739.405	361.97	489.306	1020.79	333.03	375.249	1347.91	347.222	255.737	305.537	237.594	365.315	354.939	431.301	519.184	601.739	430.343	363.067	316.778
261	913.168	1031.03	141.783	143.832	139.161	100.033	107.26	105.458	736.85	608.329	594.886	538.349	145.69	7421.34	1086.51	1209.57	264.722	290.783	168.508	197.385	1181.3	1308.32	168.55	140.969	994.719	361.587	418.559	1206.27	821.949	837.39	739.405	361.97	489.306	1020.79	333.03	375.249	1347.91	347.222	255.737	305.537	237.594	365.315	354.939	431.301	519.184	601.739	430.343	363.067	316.778
262	913.168	1031.03	141.783	143.832	139.161	100.033	107.26	105.458	736.85	608.329	594.886	538.349	145.69	7421.34	1086.51	1209.57	264.722	290.783	168.508	197.385	1181.3	1308.32	168.55	140.969	994.719	361.587	418.559	1206.27	821.949	837.39	739.405	361.97	489.306	1020.79	333.03	375.249	1347.91	347.222	255.737	305.537	237.594	365.315	354.939	431.301	519.184	601.739	430.343	363.067	316.778
263	913.168	1031.03	141.783	143.832	139.161	100.033	107.26	105.458	736.85	608.329	594.886	538.349	145.69	7421.34	1086.51	1209.57	264.722	290.783	168.508	197.385	1181.3	1308.32	168.55	140.969	994.719	361.587	418.559	1206.27	821.949	837.39	739.405	361.97	489.306	1020.79	333.03	375.249	1347.91	347.222	255.737	305.537	237.594	365.315	354.939	431.301	519.184	601.739	430.343	363.067	316.778
264	182.371	297.736	289.481	331.743	763.681	283.67	629.308	502.354	695.214	461.95	725.713	484.319	261.002	221.462	1413.96	256.696	543.538	261.052	401.515	360.625	1107.84	365.233	1313.35	99.8143	1563.45	543.673	305.682	808.193	592.873	1215.75	2009.22	926.369	676.083	863.075	524.888	1138.32	447.564	1222.65	299.345	474.068	256.598	628.856	1500.32	1866.1	843.427	1954.85	3665.25	618.365	288.919
265	562.571	592.659	239.799	557.658	890.379	528.6	718.956	719.545	779.254	588.404	1982.71	752.58	954.675	969.219	1289.23	319.527	821.269	465.156	846.059	788.41	648.232	744.846	962.655	99.6575	2299.65	474.039	591.831	1553.62	1123.26	1822.65	1332.73	875.986	1286.24	1143.93	790.434	1500.04	544.46	1081.28	636.008	573.109	653.508	1139.24	1899.11	3120.66	1816.68	2679	2193.72	1192.35	586.415
266	219.034	353.869	299.68	484.409	220.503	131.265	529.295	357.504	319.004	287.378	903.594	518.03	625.947	463.715	374.674	165.665	259.219	259.887	325.339	251.755	455.998	299.233	142.083	99.58	383.555	600.225	416.419	565.38	845.184	943.034	859.619	620.384	445.408	816.341	470.743	526.67	516.462	349.017	135.019	641.651	329.401	437.135	884.33	1052.38	810.275	1298.72	557.88	410.775	332.267
267	471.167	1712.21	196.437	597.738	434.2	1472.25	199.052	1731.36	519.254	2551.83	353.281	2593.29	575.875	1483.98	660.15	548.631	199.369	378.265	155.812	1508.18	246.44	1773.09	132.819	209.467	327.181	149.421	343.587	314.119	448.085	582.279	765.677	562.306	443.067	683.194	378.092	314.86	352.781	306.06	1881.33	325.658	181.344	1294.05	1334.22	735.915	1779.68	605.985	586.173	644.662	1117.89
268	258.652	474.892	627.133	778.766	235.206	226.666	474.41	869.654	971.289	490.933	358.587	2242.88	333.582	252.25	380.424	143.519	190.841	121.699	292.195	139.808	437.631	690.17	496.608	99.5212	1247.07	973.758	682.94	582.133	1631.09	1325.66	1645.78	188.278	141.385	534.586	304.283	236.67	1336.75	194.46	548.245	394.899	562.37	313.166	807.279	548.38	837.056	561.526	1404.18	1085.87	320.499
269	381.496	1473.05	133.394	716.804	340.684	245.838	287.644	408.075	1740.72	578.774	2892.17	1708.82	363.126	415.813	484.548	218.411	146.686	489.379	1047.02	263.095	300.277	690.139	99.4675	154.368	1614	350.147	543.871	1065.72	600.923	199.059	859.798	443.761	1357.82	768.625	570.56	154.315	1715.21	613.899	460.54	1469.1	535.362	1850.87	1822.97	2913.67	2125.23	2429.1	1807.05	1687.36	1346.07
270	883.017	695.865	682.125	505.053	320.573	254.87	708.418	474.053	934.812	661.867	1775.47	1131.81	497.267	348.402	409.155	145.055	341.353	339.18	344.328	399.538	596.102	893.942	310.925	98.5667	753.312	376.702	683.747	913.493	1304.13	1777.29	860.948	529.923	594.707	765.475	554.828	352.017	984.273	244.255	281.842	724.69	166.167	931.3	1271.43	1626.4	1268.08	1441.23	973.148	626.727	802.218
271	583.841	476.356	98.3975	162.001	358.264	392.604	350.058	492.561	751.773	701.837	926.736	449.24	793.346	591.459	878.295	116.415	616.095	546.14	619.962	481.859	483.501	620.404	949.02	349.046	582.85	797.22	648.383	832.099	965.726	1183.4	1459.01	850.913	636.146	766.396	1043.91	1177.74	397.306	914.655	437.245	906.554	412.475	1402.35	494.887	1408.67	1584.13	1904.03	556.006	288.563	302.995
272	250.906	194.391	154.101	175.641	269.891	275.659	171.072	405.336	334.993	412.012	550.492	331.161	334.239	272.56	407.993	164.804	145.865	215.686	200.743	333.905	335.276	345.849	305.174	134.154	392.179	107.651	128.376	375.957	283.457	308.204	543.699	166.735	164.936	474.178	171.726	261.959	244.159	378.291	290.277	258.587	102.188	492.09	511.041	484.726	563.462	765.55	680.034	352.313	159.431
273	1193.01	1067.61	178.706	336.892	248.124	144.47	1050.7	438.515	1638.24	386.28	1975.13	1137.34	307.974	185.144	452.895	221.451	488.077	435.166	516.076	247.466	1145.03	768.865	272.346	97.9587	390.853	397.447	610.939	1218.01	1540.42	1634.75	1446.56	669.086	487.404	1064.49	937.49	505.91	443.438	656.36	190.185	751.404	363.65	609.253	1188.98	2274.71	1098.62	2002.69	1144.26	566.766	590.709
274	664.784	869.264	183.165	349.87	1436.78	114.573	587.26	681.107	475.197	543.075	1756.35	1155.25	167.76	215.6	322.29	228.514	285.775	441.248	362.509	324.724	855.175	821.497	162.581	97.8037	417.095	502.329	455.229	839.321	1074.24	960.357	863.121	1032.77	526.989	627.327	596.933	467.549	495.632	346.68	345.789	663.148	342.171	836.466	1601.78	1596.93	1486.49	1493.81	1187.37	1144.76	564.709
275	318.365	295.188	176.383	325.488	311.387	218.488	466.981	346.348	445.417	255.71	556.233	327.165	386.106	378.658	637.96	1100.26	366.056	165.877	296.958	295.121	245.777	230.173	502.123	97.2083	936.029	182.646	172.146	669.473	455.746	593.688	463.725	175.844	403.577	625.277	219.621	459.802	278.91	504.867	374.696	874.05	220.181	390.815	890.66	1432.7	717.767	1209.29	1377.96	322.877	215.51
276	378.155	922.5	508.367	659.224	377.754	318.426	277.183	387.84	449.696	741.79	328.432	2254.61	360.339	417.256	633.765	1088.28	281.371	137.9	125.002	225.443	305.555	1054.85	791.674	97.0286	479.098	445.175	466.673	496.642	1380.84	833.98	2502.41	218.279	149.424	487.301	375.365	396.437	1130.27	180.817	646.915	469.474	1168.47	934	1250.07	415.954	1644.11	934.269	1031.36	1345.94	551.23
277	165.178	268.541	135.153	181.79	453.661	313.946	335.31	304.51	720.986	496.744	876.251	444.936	292.895	211.61	644.14	338.951	305.481	181.04	388.368	340.053	285.861	200.101	470.615	96.2	496.75	269.151	182.145	526.135	418.721	527.164	717.658	475.27	394.781	459.589	232.749	451.941	396.075	607.308	293.91	340.726	205.034	479.314	705.671	984.753	524.37	1264.91	1319.76	382.168	247.53
278	623.793	925.774	228.787	382.736	151.871	183.84	618.563	497.354	953.622	782.9	993.571	985.751	378.694	502.509	657.202	715.84	673.357	463.568	235.451	424.641	1060.81	1338.85	96.0687	108.42	497.026	209.135	598.979	458.88	699.893	1582.82	451.075	515.194	447.748	492.474	430.529	198.986	480.938	110.321	284.454	394.27	252.438	579.291	1042.54	1117.39	854.538	669.503	504.248	418.489	608.044
279	395.542	488.562	191.617	438.49	174.405	96.744	276.329	108.131	470.836	144.871	830.982	651.061	346.098	374.839	351.012	491.681	910.777	314.12	305.176	157.625	392.955	288.221	427.07	107.169	486.139	364.525	293.293	581.374	910.448	575.912	490.985	242.745	377.513	271.694	252.176	153.895	206.363	208.185	101.095	628.1	125.819	182.093	376.476	723.829	539.74	665.901	341.556	121.281	185.548
280	207.709	255.049	171.836	181.024	356.709	331.845	213.049	258.827	666.64	541.995	784.276	462.189	313.322	242.373	379.929	178.999	165.191	171.085	300.652	364.456	243.789	309.244	205.598	95.655	518.864	257.183	147.852	375.085	362.789	418.546	469.4	274.365	237.327	463.24	289.469	360.904	379.114	397.636	240.29	294.259	141.495	384.36	490.197	653.079	441.988	806.256	616.492	348.234	171.908
281	1284.84	817.197	378.851	586.78	1906.87	188.809	587.169	191.516	1058.13	304.151	1985.5	1231.12	277.586	442.188	635.28	697.389	838.675	292.136	493.464	239.931	920.43	580.774	263.894	95.4975	767.321	678.526	599.659	1444.4	1852.47	1657	1029.32	552.33	712.18	827.041	582.104	518.869	606.452	583.366	315.096	1274.34	342.845	302.865	1101.78	1910.37	1139.46	1549.18	841.644	399.183	466.139
282	422.418	1175.51	171.771	455.089	258.628	254.727	835.545	740.865	721.23	296.659	2129.95	1458.08	332.326	273.624	555.668	310.875	248.394	365.108	324.349	295.041	1180.12	684.759	126.535	95.0088	957.607	825.145	638.79	1185.56	1635.83	1859.27	702.688	1147.46	765.883	712.974	831.288	819.574	546.446	883.872	378.249	460.156	328.378	603.965	2299.53	1977.01	1793.28	2376.48	1398.7	1040.5	802.808
283	235.045	320.296	146.077	247.141	443.321	290.082	331.705	299.726	630.879	461.027	843.921	441.444	365.61	197.936	618.815	292.058	229.575	194.943	341.488	249.52	277.321	292.855	545.572	94.195	931.581	266.401	286.826	728.73	389.408	965.878	710.447	455.29	999.499	709.899	523.404	975.138	171.121	653.339	378.531	742.324	332.233	679.794	900.553	1273.58	890.561	1582.91	1417.33	446.311	316.834
284	623.388	1053.67	138.418	316.263	241.949	132.521	623.168	406.707	898.787	274.628	2363	1015.71	516.381	242.704	343.854	548.041	446.341	444.434	580.209	283.14	1033.17	873.393	130.001	120.304	667.978	1150.55	586.156	1181.89	1614.02	1387.46	679.241	739.988	691.824	1374.36	959.815	589.641	382.182	635.501	116.909	759.543	212.357	773.593	1054.79	1758.16	1695.99	1931.49	1613.26	516.021	626.288
285	249.277	346.052	233.047	311.01	322.128	151.777	275.277	218.688	242.263	635.207	893.172	285.868	333.647	221.478	720.362	171.73	183.768	148.445	125.42	350.087	415.982	809.77	203.147	94.02	376.462	254.162	347.803	2254.75	688.067	775.765	901.707	348.088	340.482	499.657	403.462	425.192	392.603	272.702	324.828	206.002	307.542	317.377	469.958	734.613	696.495	595.637	586.708	604.477	415.375
286	675.916	2337.75	93.695	1587.83	835.638	2615.92	1129.46	1050.72	417.686	4285.17	935.415	2046.72	1098.56	1685.08	1218.76	1184.47	96.92	1462.82	565.909	3616.11	833.606	2248.03	675.954	490.67	2794.89	163.873	759.258	934.139	811.509	1414.26	700.188	1147.74	1409.87	1249.01	990.364	885.155	945.058	1830.44	2668.36	501.012	737.09	4474.76	4129.81	2450.44	3387.94	1628.09	3649.85	4669.76	534.774
287	766.859	901.232	430.746	733.954	413.26	202.295	424.871	364.524	1253.57	395.272	519.541	791.357	441.967	499.654	605.47	600.112	320.776	187.949	417.356	337.645	1402.42	1039.41	327.848	93.5512	996.474	547.869	479.957	1338.04	1753.33	1459.34	2037.46	204.256	280.118	1126.36	782.475	456.386	1041.29	348.92	736.471	775.656	1320.3	684.924	1029.34	905.717	1465.83	1052.8	1199.43	929.744	526.183
288	282.135	179.151	303.984	185.031	310.668	220.071	190.8	1015.77	1037.45	440.543	900.221	458.26	408.941	271.761	655.13	675.429	640.357	222.724	333.88	291.582	229.167	323.016	925.495	93.2425	604.207	182.893	131.06	768.054	586.149	360.239	1105.63	505.766	510.892	1002.08	381.991	383.978	434.229	400.75	319.033	429.889	284.535	356.416	741.051	775.28	717.146	904.986	1500.67	403.693	153.113
289	654.065	824.851	259.438	262.039	473.101	230.943	583.254	405.82	403.86	535.064	2588.17	936.314	469.408	304.368	341.975	146.871	230.186	269.337	483.033	371.798	656.355	877.043	123.994	93.1825	502.628	489.281	409.027	687.769	1113	963.789	815.125	729.039	396.669	805.461	395.514	327.515	884.951	258.244	289.576	870.539	372.103	1166.85	1582.93	1362.46	1409.5	1510.38	1155.88	751.969	836.153
290	278.478	536.724	178.718	154.313	295.808	173.01	304.625	742.579	92.335	927.786	989.035	642.806	300.72	208.764	439.084	161.783	120.205	133.923	95.1462	345.142	577.321	897.725	351.113	141.256	558.545	332.79	489.723	528.221	1082.79	936.469	1479.21	731.35	452.796	719.91	529.96	331.746	450.666	344.96	712.29	719.171	251.219	568.58	1706.48	906.871	2309.66	1143.61	921.494	980.595	738.977
291	288.835	223.66	121.63	180.723	205.215	223.176	163.621	313.194	397.767	313.356	755.86	329.874	296.231	201.359	411.284	224.096	244.465	212.167	275.598	257.853	298.539	298.751	354.965	92.2375	570.46	203.231	282.53	531.094	375.239	429.58	450.424	472.378	394.309	545.586	267.985	460.19	159.077	465.48	452.714	433.941	162.776	533.378	776.276	786.856	694.966	937.755	804.026	526.263	283.796
292	399.71	949.888	129.917	353.955	185.321	162.112	539.536	520.795	222.163	503.21	1238.35	1097.78	326.879	361.125	722.827	280.069	346.254	456.711	226.255	347.382	566.465	674.977	282.95	92.0119	799.18	412.932	569.081	458.655	948.048	1454.72	841.83	802.976	710.325	523.092	436.337	491.735	422.292	389.739	600.515	777.663	714.879	1804.79	2234.67	2778.1	1573.43	2445.42	1034.06	1378.64	1005.94
293	554.692	708.7	294.064	522.589	153.961	209.587	375.667	792.473	261.513	612.518	933.855	1166.99	550.177	588.873	399.817	106.062	246.624	304.604	206.998	441.057	635.451	797.176	125.324	91.6738	470.727	468.968	423.808	452.592	824.16	676.144	933.007	466.919	311.44	725.694	504.027	322.814	411.313	239.945	465.939	620.701	245.231	1177.88	1869.56	1159.57	1201.58	1408.99	544.176	801.071	828.12
294	639.554	726.873	519.315	871.981	346.14	254.346	399.271	447.383	955.5	646.704	487.631	1225.06	548.91	406.656	762.679	421.879	197.619	180.3	387.604	217.798	763.167	860.325	236.225	90.9313	673.077	507.663	453.592	1212.91	1151.23	976.55	1530.06	133.946	233.471	947.775	494.529	273.94	783.1	276.073	974.325	695.867	624.8	994.181	846.35	628.231	1426.8	833.917	871.65	694.987	733.2
295	677.09	991.715	273.795	420.566	370.099	126.89	824.793	272.841	1118.9	295.678	2632.6	944.029	315.7	184.504	592.284	199.839	643.939	305.183	390.919	146.973	731.745	551.189	262.426	90.8	505.784	859.89	529.875	1124.46	1160.12	1705.26	683.638	987.896	751.84	487.076	773.395	689.82	661.701	527.441	170.154	800.24	451.181	346.48	956.769	3072.34	944.46	466.096	658.031	456.406	500.635
296	250.876	262.614	136.128	321.874	336.89	254.066	395.645	444.565	1360.84	639.61	2244.28	428.219	434.735	221.259	1094.76	447.938	242.625	344.304	419.639	332.97	517.536	391.286	541.217	116.334	910.001	249.039	259.902	852.776	655.781	595.214	679.428	718.891	679.576	704.607	431.434	729.804	465.882	982.947	146.683	364.23	177.926	468.219	1534.79	1990.13	817.394	1275.39	1815.26	502.565	119.306
297	274.699	271.131	104.081	141.874	289.674	260.55	129.723	265.568	395.805	389.678	457.116	310.096	322.894	194.445	305.337	195.553	156.304	186.04	241.679	587.316	222.349	317.624	237.72	105.996	485.945	164.768	192.234	318.967	412.762	452.313	426.05	275.111	255.356	383.104	167.091	301.761	347.099	266.834	406.109	279.355	121.643	593.967	583.35	541.554	688.465	742.786	647.55	415.095	242.141
298	254.558	342.632	350.269	246.598	334.885	273.138	216.638	351.264	191.927	656.865	980.311	355.323	352.127	234.348	214.892	182.026	90.1607	106.96	149.455	335.687	366.585	440.738	123.581	104.531	581.015	374.162	376.445	659.136	1267.27	809.668	639.958	450.987	437.339	669.936	256.46	244.043	998.145	313.524	228.324	241.101	134.999	254.179	704.448	654.368	834.331	550.851	911.167	727.4	277.495
299	244.993	430.242	151.006	262.586	363.655	272.987	608.365	697.315	1320.66	523.8	1008.76	495.84	416.854	239.554	564.605	415.115	216.387	189.014	468.439	310.992	717.898	295.327	479.777	90.0845	833.882	200.224	345.921	739.646	437.127	724.383	961.455	383.886	511.238	703.54	401.248	1048.03	496.061	724.885	252.406	457.492	323.681	618.099	769.018	1563.02	648.361	1571.68	1765.78	500.565	180.894
300	577.425	635.15	536.933	880.982	265.304	184.241	110.959	338.123	418.166	471.285	300.224	650.15	517.101	542.44	713.962	652.048	262.644	243.221	349.902	174.101	627.386	751.308	246.813	160.574	536.71	277.496	359.98	868.847	546.403	611.106	724.465	89.9475	179.324	685.044	244.706	205.738	196.954	149.684	614.755	563.589	535.714	641.851	565.706	416.8	1373.07	468.575	641.72	563.29	435.216
301	697.112	2399.44	403.887	889.381	719.09	326.406	624.55	428.275	1837.01	727.191	413.905	1904.01	850.753	566.189	1108.82	1422.29	115.382	153.754	605.803	269.99	1165.83	1219.14	548.061	89.8888	981.854	802.077	904.851	1138.58	1282.79	2341.93	1282.31	311.809	443.165	1078.14	1251.99	856.849	834.916	428.266	1262.85	1094.65	1469.01	1001.7	1799.48	672.23	1975.46	1031.86	1681.33	1552.48	1019.22
302	290.803	474.35	89.7175	324.212	334.441	400.214	645.919	496.085	559.869	1280.69	1763.71	542.699	646.289	421.928	679.536	135.871	104.463	181.36	351.103	707.601	673.37	871.112	270.669	110.658	781.691	605.951	811.935	1165.99	2455.47	1507.13	1325.81	588.673	896.808	1123	574.034	429.495	907.815	363.546	1052.46	551.971	320.946	734.196	579.263	798.074	1685.17	1166.55	466.004	1545.38	541.091
303	289.411	303.723	91.1437	167.815	312.24	304.295	252.131	323.73	466.26	377.373	887.485	472.579	395.447	260.484	370.491	269.173	157.015	143.473	262.479	352.541	260.15	315.635	281.07	89.5875	455.767	191.456	168.986	441.71	259.397	394.75	488.581	335.871	407.494	418.549	230.28	440.154	310.936	392.71	379.931	381.041	237.864	785.952	662.735	543.946	782.979	1047.14	907.699	559.84	258.941
304	387.794	705.411	170.531	302.51	305.965	237.204	825.169	303.313	872.092	716.231	2217.61	1063.99	509.392	276.491	365.191	209.563	279.88	464.314	530.371	472.169	759.276	652.847	89.6563	126.054	912.416	766.809	644.443	1447.46	1534.67	1492.76	404.635	708.329	969.798	2351.21	517.429	727.991	1900.02	498.689	454.416	640.876	538.996	1201.93	578	908.516	1592.43	701.982	1480.27	960.273	1097.01
305	243.259	387.678	148.476	200.036	152.86	105.519	304.76	169.375	251.789	239.563	1398.57	582.664	161.435	132.572	214.629	132.118	236.963	217.134	224.396	179.284	304.265	247.824	122.934	89.1125	342.082	210.076	281.506	309.229	421.281	383.426	268.514	283.266	280.999	410.79	221.859	212.36	436.51	176.118	238.969	392.058	220.319	396.056	654.499	465.613	460.165	663.349	267.411	440.66	382.808
306	2294.94	837.209	18156.7	2546.42	2813.91	194.137	1325.08	282.456	1868.16	6104.46	1463.94	2478.05	1029.19	1156.48	5073.28	3073.11	912.649	88.715	699.175	237.88	578.903	5249.37	1306.29	140.412	9391.9	2742.65	1018.92	973.704	4537.3	1035.64	799.645	220.482	189.505	9639.57	1869.17	1486.23	7263.73	123.865	3045.75	4486.02	3420.84	800.742	1299.79	373.016	3957.74	7328.66	9163.54	2066.02	697
307	2481.74	1905.41	998.665	1157.05	500.131	346.001	1228.11	830.654	1066.35	782.475	1110.39	1818.76	837.352	933.661	1581.05	1108.44	629.896	255.815	578.643	307.901	1886.9	1924.33	455.509	88.6912	2323.92	822.844	1141.33	2918.87	3773.99	2619.2	3203.3	605.131	828.01	1877.3	1415.44	692.857	2212.68	1231.92	1791.95	2362.28	1483.56	817.019	1851.66	1644.67	2698.68	1378.51	2103.27	1072.31	884.55
308	203.256	445.966	88.6287	129.794	286.865	149.706	285.858	180.795	352.605	564.636	1376.3	370.399	367.434	173.516	226.393	186.925	105.939	129.563	186.46	238.058	522.065	605.306	277.621	94.8413	473.651	475.186	415.38	621.367	1295.48	1242.31	530.117	499.065	455.913	774.814	239.042	444.27	682.224	309.255	419.094	423.522	248.623	432.811	1040.8	1077.47	1229.87	735.825	1421.46	1092.37	491.814
309	364.637	447.254	484.98	571.16	306.756	239.512	486.283	365.065	676.219	413.211	376.402	605.161	349.995	326.235	519.553	332.408	126.144	117.71	294.46	200.83	428.717	535.115	197.365	88.4587	482.941	370.391	350.461	790.003	1076.56	789.45	1155.65	138.745	192.785	607.024	324.731	231.055	1293.91	213.65	538.395	448.609	416.351	523.115	592.17	504.511	1001.9	531.636	468.647	548.924	378.094
310	171.299	173.515	141.386	161.419	234.301	244.479	140.154	242.215	415.237	392.781	608.215	266.964	201.099	202.499	511.485	361.498	246.598	237.233	311.493	269.406	262.994	286.292	337.557	88.2595	526.33	216.367	225.842	328.677	148.79	336.829	354.15	297.248	291.292	377.557	303.876	281.685	201.346	384.681	327.551	341.363	176.854	490.771	635.057	812.826	572.342	961.207	1081.04	368.96	205.436
311	791.505	478.334	424.396	584.905	205.635	148.836	264.165	334.324	490.423	527.815	356.689	568.451	259.37	451.76	795.247	197.775	196.273	254.568	228.658	136.994	587.015	856.281	114.795	176.216	560.342	247.169	247.253	795.371	877.503	622.634	612.543	87.7525	154.354	394.15	384.864	126.425	898.404	164.651	378.565	203.841	223.658	464.568	375.33	283.585	1048.92	456.95	671.371	473.178	394.484
312	482.269	633.615	287.882	612.008	338.744	174.843	360.239	232.729	645.443	442.16	523.994	488.92	236.887	193.535	333.858	288.818	160.409	122.021	364.207	134.558	711.986	554.918	250.069	87.6462	473.876	398.236	287.604	941.406	857.561	523.298	736.63	143.086	162.447	573.895	491.444	309.515	699.276	274.604	418.845	418.539	486.248	436.007	536.156	440.666	905.191	591.575	575.212	447.363	261.88
313	243.16	362.424	123.475	133.894	248.341	148.114	292.6	213.529	280.574	535.563	1310.75	323.193	281.271	160.662	246.446	139.609	113.215	97.0113	119.646	236.598	311.798	515.199	287.38	87.1388	340.668	282.165	333.251	522.216	944.46	860.173	712.356	340.684	328.089	405.876	212.825	253.405	680.116	287.311	293.511	382.955	99.3125	290.818	646.12	975.3	851.222	630.89	1142.6	664.026	336.636
314	654.836	1744.95	393.223	668.114	260.507	197.118	363.147	315.628	1039.7	444.128	280.524	943.785	502.759	471.781	551.043	543.471	242.518	260.74	414.707	192.794	846.315	1180.04	397.606	85.9038	1127.89	638.55	587.844	1414.45	1661.68	1043.15	2146.25	381.193	373.354	821.413	691.724	440.429	841.04	510.36	1082.24	921.072	773.737	779.686	1476	774.439	1741.44	983.051	927.874	1270.46	597.691
315	231.28	445.835	177.348	188.535	281.993	295.779	229.007	212.371	153.01	818.4	874.704	486.114	400.416	382.039	269.719	85.5187	143.975	279.7	122.915	439.481	346.621	915.452	238.469	101.609	287.24	308.723	916.72	402.03	742.494	564.644	810.731	391.438	276.656	344.305	271.319	277.957	416.815	215.454	636.197	457.316	201.474	427.975	885.462	657.875	991.591	694.587	510.144	745.008	533.425
316	547.235	354.373	142.686	260.137	361.106	353.05	341.68	441.136	830.802	380.511	911.621	565.507	492.463	410.05	664.955	599.273	330.518	190.41	520.757	383.957	85.4488	407.36	567.182	111.527	801.461	299.02	330.676	916.736	701.987	717.645	877.968	320.613	525.948	893.845	432.374	676.196	361.048	711.221	402.249	590.025	321.514	652.154	775.629	1175.87	933.96	1621.79	1232.63	491.225	248.73
317	121.424	151.982	376.85	511.975	537.045	421.796	168.221	471.685	705.761	111.58	184.326	343.501	279.364	304.45	2186.83	85.4036	1208.25	418.858	206.013	644.527	109.358	358.443	2794.86	92.5262	806.59	1093.87	392.495	692.112	562.651	2167.68	2460.83	894.377	2565.78	381.671	959.91	3510.22	322.194	3279.22	339.542	2101.41	606.887	173.858	1154.38	6212.53	1723.3	6361.97	5935.94	717.624	455.321
318	875.621	907.681	575.607	602.931	335.141	272.061	758.565	503.319	845.755	492.285	3384.5	1508.19	461.31	460.456	609.555	192.511	522.595	275.531	686.544	335.336	1113.13	965.628	322.069	85.19	634.716	537.52	472.515	1121.04	1395.99	2065.26	1944.05	990.081	984.231	1206.94	1284.9	517.98	178.526	435.756	470.556	1110.68	644.497	926.62	2313.02	1567.14	2026.62	1899.53	991.629	770.589	961.268
319	226.63	308.351	270.919	232.817	333.582	295.004	279.451	333.729	550.567	503.136	689.243	449.627	315.875	302.264	528.596	252.198	234.657	242.802	326.193	406.01	338.282	373.146	282.26	84.9155	543.901	129.61	173.974	429.82	381.152	475.069	530.432	392.033	394.032	536.531	269.85	323.02	371.214	293.269	324.735	261.231	165.186	539.446	778.214	814.786	670.379	645.315	909.817	482.761	232.006
320	849.909	965.048	450.37	1074.72	440.614	308.697	513.734	435.447	763.803	600.874	458.465	774.556	470.67	373.959	542.87	318.068	245.335	228.314	410.116	253.326	807.043	911.209	309.999	84.8388	783.361	529.33	535.655	1247.8	1394.82	1106.64	1343.08	241.235	309.379	1209.7	426.956	311.376	1479.96	309.543	623.928	754.383	628.776	986.133	1160.3	632.329	1591.28	692.481	1020.76	1008.9	738.91
321	595.129	1335.46	204.696	373.892	303.467	214.641	587.981	317.065	919.12	462.715	2026.16	1357.61	343.272	163.094	319.29	84.6713	354.45	411.214	280.455	231.28	851.959	1056.69	90.4387	103.67	421.649	731.25	564.893	897.049	1278.96	1389.46	592.025	771.524	605.814	1084.82	584.516	619.324	547.789	395.159	141.904	836.545	327.914	1114.64	1578.63	2037.26	1365.14	1776.63	918.164	627.899	764.134
322	413.274	567.565	321.961	463.726	239.583	204.351	342.89	323.137	363.101	372.951	314.305	652.976	312.842	237.898	475.586	306.801	183.216	134.926	225.184	172.184	407.676	601.406	212.738	84.185	649.29	330.174	288.801	713.584	720.684	534.28	959.966	134.399	156.982	597.076	278.454	262.392	610.11	194.033	355.856	426.974	511.325	556.79	652.961	441.536	1084.23	514.285	579.161	724.653	303.451
323	271.082	576.005	180.089	274.92	192.905	104.429	307.154	246.263	234.287	339.977	643.875	654.315	263.2	207.995	239.532	140.061	130.214	242.715	154.621	282.737	354.423	423.783	142.481	84.175	264.239	256.969	250.386	389.576	398.171	381.314	330.354	289.812	249.183	422.7	330.833	248.719	172.271	104.943	327.38	532.807	209.487	743.732	1302.46	661.592	962.373	791.677	425.235	728.99	601.08
324	190.489	295.757	255.019	187.355	240.036	190.09	189.284	257.259	101.139	370.113	573.24	199.52	239.085	195.27	184.05	84.1	136.594	186.47	171.589	244.405	221.219	378.465	169.92	110.726	329.664	246.042	241.871	531.472	880.411	483.757	501.005	285.786	293.99	458.216	189.691	186.841	693.81	189.424	106.016	195.529	100.263	146.824	414.275	501.414	561.188	355.841	578.38	543.705	131.563
325	187.551	437.424	825.832	234.762	234.586	124.568	213.411	173.69	113.4	667.459	607.49	254.866	250.162	238.681	280.938	146.893	136.275	138.345	83.91	254.602	339.933	604.038	257.596	109.908	539.896	200.916	202.998	281.224	507.09	374.995	437.443	151.301	181.154	428.818	210.963	114.155	503.504	99.8325	249.588	177.39	141.18	281.609	738.305	502.832	835.08	696.263	751.605	409.794	333.863
326	380.383	820.544	95.6156	175.366	1005.4	251.255	619.063	170.014	205.217	1035.43	4625.35	633.478	617.592	182.22	469.664	95.6297	98.7469	83.7375	216.363	344.264	508.078	634.116	173.941	86.9875	574.925	866.389	838.034	1654.95	3146.48	1040.52	856.22	940.436	905.959	1282.99	381.944	817.728	2800.17	644.002	521.237	913.456	716.587	740.248	1961.08	1827.08	1438.88	1580.09	2676.56	1934.24	1047
327	226.731	279.45	83.6	161.899	354.767	290.402	276.619	173.591	393.62	393.931	947.971	488.724	286.53	252.729	480.106	293.105	228.551	181.434	353.5	385.539	204.211	177.946	505.119	114.395	564.084	223.026	205.83	646.83	301.006	514.087	574.694	375.072	486.891	531.385	266.565	399.145	407.96	435.77	378.854	535.174	254.691	609.224	659.284	779.579	533.957	1057.9	1350.5	493.202	328.207
328	462.905	893.215	159.366	384.637	308.271	262.126	516.232	493.418	628.37	652.201	1314.82	929.693	239.076	270.491	343.233	180.193	236.34	451.909	273.225	389.538	462.123	769.972	155.423	83.2525	297.805	354.99	345.045	381.071	679.25	938.845	600.086	453.336	368.831	430.93	368.54	222.899	461.621	255.659	155.834	557.985	147.139	735.124	297.374	1318.99	1159.55	855.265	695.905	528.349	515.763
329	759.184	867.976	210.838	632.231	231.394	122.359	381.395	204.243	1229.58	393.035	312.095	821.653	552.319	376.529	583.424	654.168	175.591	197.749	314.185	119.248	1052.27	813.55	128.84	83.1725	923.487	864.47	669.496	1583.64	1811.31	1361.92	1012.97	219.779	405.973	1414.49	709.253	591.975	1007.98	708.599	335.209	491.668	1006.97	498.941	870.614	808.605	1524.14	1377.14	1651.34	1106.09	334.751
330	688.503	842.52	651.764	1472.92	391.661	225.408	304.945	198.346	537.591	385.395	319.288	609.913	462.93	339.17	716.352	303.623	206.451	198.938	349.24	195.623	822.543	1165.59	202.69	119.704	406.216	437.433	525.55	1016.09	746.092	755.1	937.813	83.1625	218.477	927.443	308.391	315.666	408.011	157.01	1157.88	919.889	743.386	1206.52	943.274	556.28	1321.85	578.049	810.365	708.433	697.92
331	584.408	577.056	371.71	266.494	260.587	205.646	651.59	319.789	998.273	505.883	1961.45	598.626	335.218	188.554	348.905	172.404	283.558	265.34	388.412	350.027	652.268	528.773	220.371	113.132	270.768	474.349	302.654	499.987	910.624	1202.91	527.418	349.921	524.613	551.127	480.733	333.983	663.631	305.057	83.1369	498.436	167.435	539.821	693.59	1909.7	622.694	1372.24	967.605	307.829	356.102
332	608.465	686.745	538.401	927.107	379.589	273.738	587.543	373.545	774.774	557.864	455.784	759.855	424.801	451.496	590	851.211	259.337	179.144	408.951	181.982	478.605	648.903	237.699	100.488	529.304	326.863	363.326	937.32	894.671	933.935	928.99	82.9562	172.89	633.619	259.762	193.721	872.051	179.446	445.631	510.668	429.215	491.95	542.634	271.538	845.59	433.7	594.915	484.585	332.166
333	489.952	547.582	313.166	623.926	317.146	191.982	353.179	331.614	624.311	363.272	324.248	888.231	377.945	297.165	442.565	369.121	188.69	162.644	327.7	120.156	549.461	595.179	225.056	82.7725	562.461	373.906	402.128	966.204	960.43	962.122	922.693	121.801	220.535	924.479	325.869	278.036	718.06	193.674	622.275	527.188	510.478	591.226	672.42	510.543	1182.33	639.789	771.221	641.739	544.202
334	94.5775	304.951	92.05	134.419	203.548	191.884	292.429	209.561	572.871	257.135	947.296	371.389	360.39	191.944	1354.61	380.524	396.539	220.474	374.262	290.839	348.961	174.475	382.59	82.6975	1258.44	410.284	299.845	709.474	377.651	459.87	1339.18	630.131	536.085	836.344	417.404	446.451	192.623	1018.25	303.096	297.231	356.494	881.894	787.761	1536.62	1342.12	2014.88	2580.28	443.461	212.507
335	186.713	239.669	151.818	163.684	205.357	172.723	185.167	282.331	185.626	454.668	809.511	303.775	285.659	171.539	216.713	98.9625	101.399	107.318	144.306	240.803	278.404	378.316	229.075	82.33	302.457	352.168	263.384	427.351	814.284	526.604	579.885	307.193	274.402	441.576	232.14	251.518	548.197	213.042	252.79	287.205	134.286	285.004	489.61	515.391	838.376	546.171	783.178	613.15	362.544
336	623.291	1234.25	359.41	801.356	418.444	215.315	344.43	274.891	939.741	546.043	360.262	1595.19	480.184	445.858	610.029	984.813	163.211	178.382	451.35	134.434	599.383	895.367	189.009	82.2488	746.925	784.775	588.193	1758.84	1754.42	906.475	1518.25	346.113	445.704	1202.6	778.933	535.634	657.126	498.114	761.106	825.44	668.221	814.039	1123.03	645.992	1699.88	970.116	1011.37	1265.33	508.295
337	276.245	381.911	242.87	262.378	253.141	143.605	231.45	116.666	686.131	365.353	391.618	477.385	216.954	81.5888	216.065	174.294	112.054	134.798	277.496	180.227	287.478	321.319	140.748	86.4575	191.248	233.688	195.248	412.868	623.587	425.291	508.289	107.991	124.007	360.546	143.819	125.721	576.811	111.108	417.443	408.304	297.262	462.235	328.475	207.019	616.999	263.19	421.674	394.558	335.015
338	438.411	154.577	170.864	214.07	359.798	296.88	257.205	245.318	342.18	357.934	435.632	333.202	475.802	239.559	302.261	176.498	236.011	202.459	320.952	370.739	319.702	388.995	300.875	145.339	358.018	157.223	187.109	300.189	415.586	292.03	307.73	308.45	159.143	312.145	143.216	224.859	249.291	219.932	446.08	247.455	81.45	680.23	799.484	605.793	576.511	681.777	745.905	350.77	388.505
339	251.851	685.788	142.484	810.543	159.596	133.08	224.333	123.861	508.356	508.034	116.679	772.711	184.79	198.975	329.025	258.629	86.715	276.564	272.96	81.0637	1023.7	425.96	124.078	206.141	411.806	256.012	287.938	661.576	677.475	514.219	551.419	137.24	230.465	576.48	439.423	199.11	426.076	237.955	624.845	281.4	507.058	992.77	989.251	631.401	2029.53	580.207	531.219	1413	674.734
340	499.771	662.467	269.78	574.5	231.607	118	463.709	354.944	1286.96	469.569	409.046	1003.09	339.785	300.181	362.438	644.918	127.824	236.071	424.98	80.9213	931.024	661.345	210.542	104.609	804.969	546.491	447.305	584.168	1275	761.028	909.023	282.654	279.735	641.482	721.969	312.103	866.37	408.57	412.576	535.443	455.48	399.582	752.751	998.374	993.102	762.923	1118.35	858.514	201.56
341	973.534	1250.11	986.472	953.865	552.36	349.105	408.97	401.938	1755.86	492.464	925.97	889.301	575.298	496.859	778.654	335.916	345.509	223.884	657.45	318.887	996.655	983.384	653.479	80.7562	819.099	615.465	541.866	1374.79	1763.46	1365.14	1537.35	170.926	385.378	1313.45	683.903	468.373	984.934	603.337	1061	1516.81	1590.99	864.8	1317.49	1092.42	1228.17	1302.03	1339.4	888.1	921.332
342	172.398	165.841	80.1612	122.458	266.324	203.544	126.091	774.525	455.88	344.517	867.816	312.776	256.629	184.381	289.443	167.803	242.477	225.915	259.075	330.879	201.338	258.031	250.199	81.7262	497.429	231.779	191.811	396.705	245.896	444.505	361.676	266.743	280.83	366.923	183.441	334.835	483.283	309.254	304.084	307.674	144.899	522.13	468.915	798.324	541.769	1061.11	1387.93	285.481	235.436
343	965.41	767.495	389.686	481.364	284.134	90.7775	599.587	233.077	1937.39	229.906	4670.81	1167.08	489.815	292.205	781.62	330.813	1054.23	550.109	415.975	169.768	1025.74	871.719	471.801	148.325	575.592	661.883	508.489	1155.26	1530.78	1886.17	951.241	572.104	507.632	731.119	541.585	386.644	980.898	534.265	135.224	1354.42	205.443	288.071	474.558	1808.85	1018.91	928.145	687.674	266.371	398.565
344	1005.87	1137.32	609.803	618.68	435.379	345.395	899.099	600.878	1289.94	658.411	4235.44	1760.39	544.665	467.908	645.308	247.276	592.751	267.702	993.18	478.601	1283.3	1026.52	340.584	79.7175	763.5	764.072	616.795	1569.83	2019.54	2615.8	2359.1	1191.48	1249.2	1427.67	1454.64	615.22	737.934	581.646	594.351	1296.07	821.941	1056.21	2589.01	1901.9	2460.95	2122.13	1239.45	937.186	1121.03
345	512.599	523.749	152.866	244.919	310.004	308.069	297.426	358.46	307.731	813.635	1343.32	469.717	312.54	326.131	650.33	230.835	79.455	118.045	229.41	383.141	639.281	1083.63	131.795	101.694	470.469	238.336	223.713	303.861	774.329	491.827	452.044	239.995	302.353	403.159	229.632	174.197	723.356	176.468	457.688	324.257	119.344	663.35	1036.63	513.931	1489.36	727.51	1032.4	865.156	536.38
346	349.67	648.021	113.844	353.543	135.394	96.7675	325.033	267.02	366.516	228.648	821.846	835.332	118.864	160.16	208.654	129.151	167.278	333.879	140.458	187.083	628.335	483.697	143.123	91.9825	258.385	242.618	248.776	342.371	624.255	899.714	400.549	241.309	293.581	202.125	414.637	235.834	241.381	207.356	82.5637	409.926	79.3762	329.785	1067.06	1180.07	857.995	847.745	506.135	339.676	251.546
347	682.136	782.801	417.337	661.154	395.711	174.884	373.625	257.214	884.597	325.025	318.851	811.712	448.363	370.124	649.204	791.875	276.793	168.444	291.109	113.206	803.526	755.944	391.878	78.9262	762.766	723.98	605.164	1343.23	1363.61	1246.57	1434.82	206.613	294.661	1154.36	435.495	465.56	857.429	415.564	845.515	872.134	717.785	710.26	807.749	743.751	1132.96	992.072	1335.24	737.033	615.774
348	333.011	524.888	348.744	633.273	254.059	184.209	444.506	457.191	297.873	365.685	276.42	434.249	420.821	358.73	604.634	319.098	117.619	134.141	348.14	159.829	443.046	554.612	137.605	78.9112	461.33	244.115	229.125	524.411	568.995	441.216	522.895	112.616	133.64	463.5	318.456	235.18	575.935	137.813	337.391	339.729	370.053	725.188	651.933	538.224	1321.36	428.139	565.818	871.149	287.842
349	510.969	457.985	395.483	664.088	346.013	210.783	288.101	341.901	695.455	456.271	394.854	708.339	305.542	303.198	532.879	287.157	150.82	141.474	289.832	162.868	430.179	674.968	146.62	78.5298	422.304	279.827	292.575	861.517	720.871	632.383	734.619	104.19	128.299	675.568	409.101	195.16	423.612	159.426	350.258	289.012	351.93	526.236	369.754	101.69	740.546	192.955	234.731	437.315	364.395
350	336.571	1115.13	454.751	267.263	416.36	708.715	302.787	220.182	456.521	2142.23	1120.53	805.738	313.489	495.531	653.394	596.629	250.104	186.293	160.796	800.81	642.633	1961.03	78.3607	110.154	1297.36	413.794	687.157	513.712	1187.47	928.877	2150.2	939.527	383.036	602.44	252.969	164.875	777.59	523.456	1315.11	236.652	344.613	999.295	659.694	538.548	1455.99	738.564	1286.79	1502.64	707.645
351	238.207	279.844	241.242	237.371	236.283	197.194	264.604	381.474	227.917	475.09	1019.7	333.39	240.071	192.406	408.893	157.906	110.348	87.5179	157.646	243.777	403.507	685.225	197.177	78.3583	329.124	220.569	223.655	384.567	732.198	478.619	557.099	174.313	276.104	398.918	204.045	153.392	703.701	145.386	197.529	241.4	82.85	340.018	695.644	564.686	834.327	613.718	665.288	604.188	332.51
352	325.174	434.895	225.664	452.207	174.506	160.771	302.887	266.819	488.716	312.465	170.404	400.296	213.452	174.641	323.125	174.551	103.665	122.429	229.934	122.405	439.125	532.467	121.249	78.2913	424.131	292.234	294.762	587.433	986.361	509.21	855.934	121.052	138.509	361.141	238.374	188.03	599.582	170.012	350.189	363.478	348.261	415.695	571.722	334.897	813.171	391.62	381.438	394.001	218.675
353	609.839	616.739	570.589	579.443	294.839	197.755	349.223	225.58	706.364	380.605	320.893	586.489	372.157	288.332	526.257	228.114	199.236	196.82	260.048	182.911	490.977	692.398	133.991	78.2159	515.802	335.2	334.777	716.657	1094.05	675.855	1423.35	153.282	137.177	799.084	398.564	224.486	927.614	225.175	188.15	459.684	564.275	565.014	690.923	450.043	1181.02	579.564	669.918	735.425	564.689
354	221.48	412.025	1460.02	1304.04	448.626	286.399	591.976	1182.44	174.921	761.701	1935.55	2022.63	872.405	1446.68	413.234	552.533	2327.28	548.551	90.32	468.962	227.268	1911.93	159.311	291.73	1709.68	793.224	443.301	131.54	442.947	349.074	169.366	319.896	389.796	523.644	309.115	303.756	1102.04	77.9525	442.027	626.141	197.598	657.209	704.969	222.64	2341.42	556.731	653.71	983.783	549.809
355	326.253	411.809	427.274	402.541	241.947	203.694	373.178	357.668	691.595	375.405	277.519	740.528	280.527	224.12	391.82	276.365	105.986	108.065	283.418	245.863	308.97	323.48	95.1188	77.765	367.795	251.75	232.833	429.751	756.904	547.661	703.186	120.85	157.371	482.181	186.863	136.04	952.102	166.428	258.384	230.144	190.068	228.15	459.178	290.259	493.76	294.068	541.595	424.511	217.27
356	401.659	451.072	282.887	262.071	158.04	157.781	430.048	333.825	433.861	407.89	1095.15	581.513	379.094	195.903	229.819	117.345	299.331	255.921	271.098	277.659	436.466	503.199	105.598	77.6112	379.376	300.033	246.335	489.988	823.799	671.536	615.889	358.261	312.985	512.149	295.65	172.705	554.069	128.786	151.476	472.874	162.537	669.504	757.316	863.7	835.798	855.81	519.974	357.119	421.111
357	2422.34	1080.97	10119.1	5894.03	2740.05	2276.39	1302.24	1402.04	417.048	2290.26	3990.76	5407.14	2041.13	4484.48	3248.33	3289.27	1541.55	608.64	426.095	2295.78	714.135	5709.72	530.033	233.412	7981.85	965.515	1064.77	739.933	1540.77	727.564	253.865	569.215	1720.31	5217.9	1750.68	1172.03	2089.58	77.5438	2167.1	3502.78	1422.66	3660.48	7548.69	1407.09	5259.14	7938.48	4776.07	2279.53	2839.78
358	614.495	767.766	446.714	857.158	299.824	112.315	590.604	232.18	1320.43	309.421	729.725	1048.61	501.832	380.805	780.019	942.476	232.248	111.125	321.88	125.93	609.928	641.134	302.334	77.405	1024.9	585.249	505.553	1516.9	1706.87	918.065	1170.16	181.115	286.645	835.78	460.577	317.465	691.702	383.88	584.385	963.237	429.941	331.724	584.499	765.144	943.266	708.379	813.496	473.489	364.866
359	201.947	333.025	105.116	203.834	298.733	181.395	373.394	286.97	838.549	388.979	1060.15	384.431	297.51	171.623	365.501	242.014	201.403	157.416	370.319	244.493	236.973	236.363	396.846	77.3875	497.212	282.853	249.558	574.832	354.054	665.795	320.909	377.848	326.105	475.541	226.351	671.046	313.641	286.765	219.884	320.535	264.9	440.771	527.831	892.856	550.658	1360.84	1484.25	392.89	212.481
360	518.153	264.276	104.62	244.999	425.706	307.239	213.723	282.173	1318.33	287.087	765.825	401.759	435.647	339.326	579.761	462.467	439.294	178.145	488.988	318.78	913.261	290.522	546.136	77.26	721.304	221.761	220.076	586.395	525.429	1001	611.487	357.777	576.059	622.226	572.957	349.945	319.55	568.14	260.564	309.629	373.8	513.075	629.367	1661.75	609.106	1382.7	4047.67	280.618	255.67
361	473.555	844.811	193.166	419.725	515.322	192.325	631.472	334.934	877.394	409.928	1489.51	1132.33	409.358	303.603	566.761	179.584	242.291	325.267	450.839	206.794	672.87	713.565	236.748	77.2163	792.616	425.141	613.935	711.87	690.675	1802.2	620.735	646.179	647.85	360.979	829.018	540.515	644.04	313.734	259.56	889.984	359.994	689.697	1545.47	1555.89	1486	1685.33	628.24	598.433	607.406
362	390.493	521.999	124.631	301.901	149.459	101.509	300.294	373.46	494.257	384.313	1045.42	621.159	342.145	204.965	214.495	110.309	202.154	260.641	232.838	278.476	411.99	554.376	93.4463	77.0875	184.549	325.533	311.836	233.409	598.629	598.144	491.337	261.82	144.675	333.09	360.516	187.589	326.679	161.167	156.015	489.495	173.831	737.011	976.424	723.83	973.934	938.753	533.71	503.036	472.281
363	260.501	521.534	103.771	98.525	261.195	207.262	255.232	279.079	218.162	629.689	1318.78	445.351	245.792	224.827	313.923	428.67	141.373	163.575	77.0738	376.225	376.424	471.65	346.575	147.38	637.545	365.527	468.283	447.674	1013.61	1248.27	621.263	336.858	399.524	366.315	224.454	229.452	804.591	433.783	422.941	332.28	142.734	395.154	831.38	518.019	1582.24	559.065	1177.87	769.144	387.331
364	118.715	151.625	88.425	191.396	272.569	259.741	219.378	350.681	246.17	433.07	781.839	581.386	196.63	96.1238	328.913	110.507	195.504	189.704	340.905	329.735	139.564	165.061	332.696	111.89	288.949	105.325	107.544	212.128	231.838	282.529	619.21	359.476	265.576	285.54	178.829	316.085	265.813	283.404	254.411	211.586	142.341	496.043	1187.9	693.924	625.466	870.872	618.49	443.32	261.022
365	563.796	208.955	175.626	207.489	390.939	280.015	383.964	324.09	1029.81	355.697	1267.91	288.741	424.822	208.474	585.69	146.421	254.621	156.841	421.035	324.056	495.289	303.635	683.215	76.1975	686.426	428.019	324.21	842.913	512.195	840.939	1487.62	584.258	769.285	795.731	819.681	799.501	503.339	794.497	298.124	579.154	219.003	474.582	615.086	1678.26	776.385	1811.37	747.696	296.599	196.995
366	601.259	559.474	713.602	630.859	1126.41	1047.12	1069.33	1022.66	2162.95	1616.9	2148.22	1087.08	756.982	422.038	1019.63	568.617	122.055	118.558	993.495	1071.41	911.939	1202.55	346.663	86.9087	387.9	164.885	302.886	455.869	447.765	1251.22	634.082	329.52	417.594	659.472	292.79	626.357	1030.69	686.129	135.521	142.555	99.3287	306.094	493.896	1054.86	526.011	692.352	1197.57	453.058	268.931
367	607.489	622.389	578.722	562.943	445.941	350.664	1068.3	596.981	1453.57	879.436	1537.68	930.875	318.202	246.991	290.511	292.541	205.96	189.723	594.818	718.476	1108.31	833.936	90.2	82.1225	237.476	239.386	206.123	449.395	757.535	844.464	507.226	258.051	278.553	358.048	245.555	175.559	832.804	140.705	76.015	223.365	89.225	369.673	463.587	608.354	358.49	464.08	262.288	208.5	222.16
368	149.102	220.034	171.096	147.504	258.575	220.769	171.406	291.839	404.046	443.59	694.36	353.327	257.384	172.363	329.853	147.264	179.349	205.374	236.473	282.164	202.539	248.33	314.503	75.9825	367.319	155.667	151.373	359.473	395.105	396.308	549.433	583.128	341.691	695.688	185.493	373.081	425.451	314.123	245.884	256.795	161.064	493.941	990.035	1017.61	554.441	900.839	1108.34	705.55	253.265
369	175.904	381.479	75.8912	107.14	357.744	139.069	248.92	132.961	143.045	436.466	1143.12	309.738	405.765	237.894	334.819	224.566	114.139	112.103	180.566	258.414	341.821	312.981	203.22	78.8125	450.087	652.558	417.949	673.271	1074.67	886.795	394.454	303.783	398.896	406.733	285.254	195.533	813.2	343.994	388.478	372.804	145.129	335.913	193.826	587.264	816.635	630.934	1035.5	509.819	335.416
370	706.106	699.692	217.304	305.985	423.248	339.325	316.652	657.5	389.948	969.871	1511.34	75.7917	475.329	1206.58	783.567	275.244	211.867	249.81	299.29	473.229	1067.66	1517.06	404.156	171.769	549.419	454.573	473.2	905.881	1398.87	1073.65	1223.18	343.581	497.59	624.723	509.806	343.996	1260.12	390.896	493.694	413.44	240.873	554.177	1285.41	1071.77	1585.95	1265.81	1026.8	1051.83	575.235
371	802.117	1105.13	223.06	586.523	471.844	181.042	379.155	286.954	1282.21	459.439	477.449	736.561	451.736	375.626	617.471	679.831	186.486	196.881	374.444	160.45	1057.28	796.997	304.85	75.7862	1018.66	733.839	562.601	1404.47	1632.11	870.861	1013.41	275.095	291.15	761.087	727.852	378.241	881.125	588.6	346.766	757.245	780.689	524.095	891.63	392.585	1285.45	716.503	1355.71	802.288	255.955
372	177.645	199.063	94.465	159.659	177.542	239.455	270.23	252.831	524.5	341.406	496.024	410.006	231.656	181.803	367.743	260.959	143.303	173.229	289.637	258.923	324.624	199.566	405.21	75.6637	475.378	144.14	183.396	401.575	270.431	274.919	390.896	178.3	248.572	319.805	208.739	279.486	197.384	303.308	247.669	291.658	114.93	445.257	506.808	718.482	449.735	708.285	1063.61	343.777	122.013
373	322.945	342.739	325.264	462.762	172.66	117.835	277.262	249.035	516.383	237.077	189.689	571.627	252.214	265.011	285.163	428.029	174.748	169.588	233.829	95.2143	316.18	351.469	173.954	75.5952	426.274	177.926	213.938	630.776	700.173	466.012	616.204	91.1167	121.968	463.949	211.33	117.852	552.877	149.456	276.231	314.394	248.999	238.407	423.133	275.279	637.463	370.685	370.548	360.738	203.794
374	334.01	453.048	260.135	481.814	188.85	148.379	222.981	250.563	449.458	258.97	256.871	391.649	273.95	245.912	479.264	185.25	112.786	150.331	249.637	100.036	363.999	438.724	216.569	75.5321	576.86	362.162	350.9	641.126	843.804	542.26	937.288	140.218	121.812	484.679	391.58	163.352	380.448	216.856	298.054	526.045	341.192	570.599	478.624	175.257	1214.89	663.368	633.411	538.03	222.862
375	233.765	297.474	228.065	231.606	259.933	245.566	268.86	338.245	188.661	532.936	725.798	397.236	333.214	214.704	358.695	115.436	104.686	103.595	131.655	299.421	378.756	594.117	192.145	75.4038	355.501	241.774	276.314	444.082	852.558	559.98	630.761	333.123	312.054	488.142	211.754	214.165	748.831	215.954	289.827	354.285	157.554	447.969	930.676	658.484	1025.95	794.185	946.543	845.699	504.541
376	415.554	524.41	292.085	293.048	264.266	196.864	342.901	293.706	280.908	292.67	935.615	688.244	237.313	205.221	271.596	75.3888	396.71	552.298	342.261	226.882	524.555	464.027	149.498	194.576	424.331	283.265	234.741	516.484	704.459	585.66	375.911	422.571	327.016	447.125	320.262	214.526	660.804	182.223	91.8088	393.714	225.395	396.082	561.411	797.23	668.821	984.42	414.081	343.871	198.941
377	282.279	761.379	217.133	321.62	104.642	196.595	195.65	388.407	161.104	445.744	526.65	477.913	260.174	319.444	199.573	208.614	180.898	632.944	111.217	351.35	325.47	444.5	75.3679	210.223	193.571	150.993	150.685	246.924	340.164	383.355	274.546	149.712	150.568	237.792	156.995	87.5643	246.995	79.7119	471.223	236.267	96.2702	686.633	828.645	392.742	615.354	422.79	217.024	713.696	334.124
378	615.146	622.746	636.02	580.515	111.162	75.2987	424.059	405.274	358.628	386.024	996.38	692.109	796.605	437.592	641.145	247.165	497.724	220.451	312.322	220.363	876.339	1005.2	181.484	106.205	559.896	307.561	358.467	462.983	895.394	786.591	1005.24	291.66	407.428	637.481	443.775	265.386	150.754	203.077	321.904	961.003	159.066	1020.82	1144.62	1265.08	1133.99	1477.8	529.938	564.951	692.074
379	180.529	163.256	103.858	169.053	239.144	218.896	147.165	252.421	307.634	345.514	511.017	310.93	239.894	187.003	309.936	183.732	151.219	121.316	190.819	264.964	208.589	258.934	262.936	75.0138	336.596	121.37	130.431	246.75	207.748	318.131	360.726	187.874	215.889	338.813	139.351	312.951	239.748	247.079	247.014	201.732	153.115	446.101	428.029	410.017	492.5	693.521	597.524	344.788	145.105
380	202.924	116.624	83.3988	101.05	222.846	158.709	100.229	91.28	196.764	224.156	384.9	144.84	157.806	141.803	164.841	89.1538	169.071	133.118	164.352	177.764	180.167	204.746	178.325	75.0075	276.391	112.468	109.549	223.727	150.39	151.783	208.443	206.193	167.744	269.628	124.491	219.221	93.5487	217.827	250.374	218.416	92.2638	402.056	227.266	472.676	371.021	672.693	562.084	218.341	182.591
381	91.5387	285.464	130.903	253.466	415.168	318.266	340.024	394.7	272.196	507.223	1038.52	394.063	201.596	181.64	546.308	211.746	93.2987	198.625	363.88	407.634	235.009	212.012	269.819	74.4237	614.803	218.774	193.436	504.73	291.814	414.226	652.47	458.559	463.123	1048.54	234.594	637.311	438.309	544.916	308.704	394.594	298.767	762.653	815.405	1386.45	686.384	1543.77	1650.59	534.44	237.735
382	345.835	340.511	289.493	229.246	134.333	112.732	308.707	312.052	406.064	258.169	706.204	420.202	366.112	225.144	252.354	126.593	256.652	195.96	225.955	241.756	319.113	462.818	110.611	74.2226	254.261	229.17	220.111	352.288	646.761	598.55	559.967	216.212	174.492	392.974	264.427	106.862	297.785	98.9631	145.983	416.26	112.26	440.774	515.461	667.873	597.414	581.031	320.379	223.158	334.088
383	540.079	602.717	259.569	365.603	160.861	95.5662	506.452	237.94	804.956	371.685	1340.99	1000.93	293.095	290.572	396.776	560.796	523.329	308.137	267.077	190.77	576.691	436.395	233.718	81.8825	460.29	337.354	332.462	550.805	709.824	926.188	360.171	344.581	479.149	305.106	321.226	235.786	424.864	302.435	190.111	605.508	291.21	294.681	713.411	1034.17	803.793	644.241	449.954	246.189	345.61
384	2027.15	1652.94	658.39	1381.49	1780.68	1240.98	1843.54	1094.33	6406.69	1539.44	4631.34	2682.58	1632.32	1962.57	2517.2	3322.97	2904.69	871.112	2163.78	1549.39	1254.26	1324.21	3416.53	550.3	3381.94	1165.88	1256.91	3859.82	2881.11	3926.38	3770.84	670.629	2028.14	1498.15	2225.12	2083.82	1557.47	3604.62	256.899	371.545	430.59	384.697	854.043	2354.92	554.704	3741.64	2944.94	628.969	73.6563
385	236.42	261.373	467.371	205.154	244.525	150.464	237.526	266.741	303.451	452.38	1110.99	354.65	218.697	214.604	429.207	73.565	107.715	100.365	85.4488	193.679	474.178	593.946	467.235	74.9325	238.665	241.568	206.727	370.17	403.314	506.421	363.005	181.501	172.539	228.369	172.579	124.796	373.318	185.53	262.546	397.983	113.815	293.541	470.536	536.048	628.269	588.595	704.7	319.496	226.315
386	352.764	429.224	82.1863	110.634	505.955	156.757	416.531	73.4463	208.486	615.61	1581.05	493.179	416.378	408.13	395.589	610.765	358.149	124.583	166.959	266.185	225.844	528.055	628.831	153.506	460.459	559.318	517.617	845.415	1187.57	1201.19	543.065	323.195	411.413	180.693	194.43	234.262	801.694	247.102	394.99	335.724	144.904	236.804	143.125	650.181	642.258	278.481	321.314	120.078	90.7338
387	296.387	278.58	125.278	125.789	215.604	141.162	181.099	174.92	147.299	446.411	1296.2	294.149	178.16	151.859	237.208	115.065	111.643	96.2763	114.425	197.896	425.486	524.546	197.869	73.4363	262.7	248.798	221.173	716.403	573.349	475.489	378.132	214.586	204.934	350.624	233.374	154.044	236.129	167.822	282.863	297.944	127.471	359.296	729.98	529.268	764.47	723.626	1039.95	555.933	392.961
388	242.219	344.884	370.688	327.724	218.613	141.519	314.014	234.976	542.74	296.221	213.689	515.241	192.943	166.315	230.605	202.521	98.8337	100.845	244.197	180.952	257.897	280.854	106.36	73.3875	399.08	191.762	183.805	388.636	520.519	394.027	556.875	104.043	104.91	404.288	151.159	113.435	760.424	140.526	225.736	206.54	195.559	186.039	311.035	265.435	421.695	262.886	398.581	346.776	183.558
389	238.613	446.739	95.8037	289.46	452.449	395.144	342.837	420.096	290.488	567.247	451.549	441.795	439.043	256.085	481.863	462.207	117.441	241.85	352.988	577.383	340.406	328.324	181.236	133.084	606.431	234.755	238.541	383.2	221.904	536.274	147.009	173.435	611.986	337.371	208.891	283.846	330.046	577.433	280.261	233.019	114.294	951.235	771.633	767.15	860.985	805.346	743.866	502.746	270.89
390	496.18	809.046	465.794	442.194	305.52	174.11	329.17	196.405	362.075	455.175	318.253	779.166	311.305	267.611	469.314	208.961	240.249	159.549	364.281	196.128	482.274	900.383	209.345	73.3462	463.285	283.639	399.003	497.54	1071.96	628.414	1678.67	271.175	210.843	511.91	393.801	301.595	914.638	182.743	853.851	403.701	650.596	738.114	880.71	358.619	1288.23	603.896	478.83	846.986	768.289
391	593.614	492.724	80.43	253.775	346.855	73.1875	521.095	244.194	876.116	197.025	1865.02	748.431	326.693	174.505	564.753	89.3588	455.459	359.507	488.413	131.709	1013.88	496.76	389.966	100.099	522.695	459.135	525.209	799.013	1256.51	1655.07	1069.96	709.841	518.159	688.874	647.911	528.962	470.89	275.481	184.665	711.164	330.076	320.184	1162.87	2864.91	1020.99	1927.63	1121.6	433.506	316.149
392	122.162	136.385	105.314	115.129	254.485	217.903	138.351	141.914	322.321	353.434	493.22	321.046	219.241	154.528	162.531	86.7512	167.099	132.99	228.045	288.595	78.3988	167.454	210.507	91.0675	331.796	130.106	99.9663	233.356	298.83	325.217	234.98	175.996	250.769	358.221	113.554	256.305	343.029	238.195	163.154	183.995	114.776	443.929	348.099	343.391	354.868	672.484	611.309	308.729	130.618
393	181.715	287.171	132.96	134.644	255.446	186.223	328.549	205.96	94.5975	502.245	943.375	369.66	330.358	169.58	324.546	123.175	74.0288	80.3263	81.8012	196.16	424.864	605.013	199.67	72.3838	342.554	325.124	299.704	325.441	885.768	485.012	587.102	316.441	325.511	261.416	240.004	235.354	527.629	257.21	338.957	396.503	203.101	359.815	762.454	590.701	935.376	770.664	740.633	754.952	429.6
394	362.628	600.341	222.646	319.961	211.618	153.626	102.979	72.375	453.348	325.776	239.324	438.321	185.766	155.155	262.626	128.958	92.6262	158.439	216.024	149.29	314.056	479.671	116.925	75.9887	267.159	217.096	198.451	464.89	396.276	370.031	525.84	89.0637	97.7175	448.139	157.604	132.97	314.529	109.315	278.714	361.72	337.033	382.228	398.993	156.759	605.1	244.451	489.514	202.541	253.533
395	437.063	1078.78	314.957	624.624	229.181	202.3	149.051	243.507	434.808	643.318	368.284	598.19	357.115	285.827	503.085	398.444	81.5563	179.09	283.835	239.54	577.599	571.334	139.15	72.07	465.655	252.786	385.551	657.169	412.15	737.255	1494.63	252.58	183.796	459.979	369.031	165.8	166.175	188.125	780.949	420.026	591.796	1004.24	1048.46	628.188	1685.34	750.424	748.229	1249.48	524.741
396	280.94	213.511	142.501	137.892	326.458	366.962	178.937	297.998	814.719	439.279	688.326	362.97	280.598	205.91	405.976	176.402	167.933	116.363	289.787	403.535	205.171	257.048	287.105	72.0655	441.651	226.425	173.373	432.585	195.494	562.163	534.356	155.973	286.273	492.298	186.624	404.004	488.236	346.267	288.318	257.057	113.982	489.337	397.738	547.292	318.511	673.217	616.189	257.381	212.79
397	2079.24	941.332	294.745	724.221	525.847	153.926	657.48	366.52	978.482	278.676	453.75	910.216	684.494	631.456	766.441	1633.4	124.82	130.041	477.816	103.418	885.575	879.84	578.86	72.0275	1296.95	515.555	659.607	2076.12	1951.34	1003.38	1330.69	230.986	405.319	1355.52	972.766	739.946	1196.79	797.857	789.068	1979.43	1069.81	451.406	1011.55	1214.61	1434.35	920.659	1944.74	666.987	378.32
398	342.936	239.967	778.258	788.601	276.873	110.812	546.808	468.073	359.925	217.357	138.375	489.917	589.807	630.24	914.4	450.425	120.167	116.196	332.227	188.046	368.808	442.125	87.2083	71.3524	440.264	201.383	253.657	564.83	496.787	737.371	558.13	76.0512	153.82	366.979	200.227	248.573	240.815	150.357	199.876	265.701	227.513	284.625	412.08	215.24	550.717	342.694	344.325	472.115	249.313
399	154.325	177.135	72.4875	116.828	274.406	92.5037	221.713	148.094	877.604	169.856	719.753	238.338	200.911	179.322	381.925	243.194	213.696	164.955	349.791	120.851	237.98	141.036	396.956	71.2438	387.441	195.339	142.631	306.621	320.285	402.413	445.092	167.884	221.153	390.894	174.011	456.91	297.456	478.207	137.055	289.116	154.368	272.859	282.839	914.696	327.981	812.264	986.175	182.034	100.933
400	177.35	519.987	182.548	344.824	133.618	103.93	180.75	175.974	319.202	239.119	120.244	652.224	167.166	220.425	250.893	162.757	83.325	124.235	170.539	79.54	441.933	503.808	136.519	71.175	357.369	266.318	296.178	474.806	693.857	489.796	1155.39	189.949	111.848	458.265	373.582	165.095	341.161	171.186	408.246	282.585	328.505	285.736	778.816	332.702	1092.28	438.163	274.077	568.617	272.244
401	460	1001.62	259.049	496.556	261.971	164.491	262.505	399.294	157.697	342.848	361.674	673.669	362.568	282.946	452.605	507.322	78.0975	146.132	208.95	147.238	768.73	799.841	71.0413	98.0075	670.895	470.749	432.941	674.768	914.091	696.874	530.781	217.941	201.37	844.545	382.789	381.374	855.246	281.174	599.404	560.004	1191.42	1143.06	469.326	498.424	1020.51	610.046	1333.67	1028.05	581.939
402	449.428	433.043	281.675	339.274	160.018	162.787	464.884	334.949	356.728	329.006	907.393	507.255	487.811	306.306	323.025	138.476	228.445	237.704	240.07	254.215	546.314	668.06	108.075	70.4575	484.214	354.325	289.585	449.777	1002.55	757.875	840.741	452.673	357.226	686.793	441.926	224.848	508.543	173.109	165.454	501.897	155.363	788.722	1160.53	1183.86	1010.27	1150.39	644.602	437.309	479.947
403	435.396	797.871	242.314	738.694	242.158	75.3012	370.238	138.419	1048.81	282.112	368.726	609.317	615.311	387.312	731.85	616.514	218.188	169.094	285.398	70.4512	1156.45	726.046	156.056	100.401	714.208	525.979	526.555	1221.4	1226.97	823.342	1134.85	217.187	364.48	703.339	573.852	403.081	971.643	432.605	386.065	296.063	620.965	416.063	709.242	743.676	920.275	609.801	1020.45	648.819	288.494
404	283.048	323.518	161.366	398.923	132.966	100.364	867.875	245.191	225.105	335.809	218.332	407.818	164.409	237.85	442.42	213.8	97.2545	145.282	208.127	95.5409	342.58	420.993	140.7	74.0795	332.425	149.064	130.795	439.016	473.202	322.011	383.591	70.4295	74.7	325.177	166.782	83.3205	320.048	88.3386	320.123	217.552	264.625	349.911	345.382	279.755	646.52	271.707	348.945	318.98	214.434
405	180.89	130.878	99.935	118.007	231.151	271.493	188.91	154.225	379.085	492.535	459.337	319.689	253.654	149.809	359.125	70.3162	162.447	219.974	205.576	260.943	226.806	161.94	203.269	71.5613	272.594	104.926	173.735	254.292	347.689	427.524	671.629	220.553	313.794	411.73	265.966	420.749	356.449	222.257	247.821	182.9	126.507	721.601	256.156	364.125	691.303	494.359	573.693	373.67	131.406
406	237.839	313.544	74.1338	245.873	176.893	261.131	206.126	343.345	501.779	523.349	426.129	346.089	378.925	479.33	569.154	672.276	142.458	232.58	312.464	359.795	507.251	329.974	157.55	69.715	658.925	153.611	188.215	530.445	345.974	431.217	586.539	279.191	394.349	562.68	375.625	320.923	252.135	452.103	281.915	352.796	193.355	612.41	360.171	851.476	774.107	1220.36	1138.44	271.034	149.294
407	162.519	300.291	143.67	181.449	348.61	245.819	324.695	286.904	307.725	479.359	903.726	460.695	265.08	147.061	382.628	228.05	190.004	172.848	315.326	276.223	236.985	286.481	381.81	69.6988	609.79	208.085	209.63	665.279	439.938	489.324	487.99	500.546	573.621	815.31	242.051	701.491	471.315	497.269	338.745	350.829	281.665	679.569	1296.1	1124.2	901.455	1154.51	1202.42	824.487	341.469
408	285.448	281.35	140.918	219.274	154.462	137.852	303.317	275.274	258.048	153.09	1040.42	473.685	139.588	178.432	269.969	201.446	170.724	267.63	183.573	220.277	264.749	258.765	132.379	69.6952	420.318	249.849	201.442	467.439	588.88	398.202	224.851	241.305	302.137	364.465	236.165	128.18	476.885	193.585	248.265	491.877	192.806	631.283	759.815	785.536	800.436	825.129	705.681	718.014	301.423
409	196.892	185.545	202.263	159.224	244.606	293.66	152.712	242.46	559.704	404.225	546.132	304.543	245.244	213.48	345.649	220.252	147.149	122.192	219.963	320.761	199.78	234.486	170.21	69.5762	396.943	136.74	139.383	345.965	330.09	411.5	374.623	215.218	277.614	359.05	168.295	244.367	390.937	236.719	243.26	205.426	82.3083	513.889	494.524	611.277	616.361	633.612	601.004	387.668	168.563
410	953.251	1078.15	1302.05	1440.41	645.855	531.5	982.275	790.61	1328.83	941.865	843.744	1333.95	693.628	520.514	1347.4	591.581	259.4	161.575	655.536	454.467	704.251	1024.74	668.469	69.4788	935.859	849.702	782.255	1459.07	1843.89	1524.63	1837.47	239.605	417.969	1123.86	556.023	437.301	2081.92	431.515	1030.8	1000.59	1158.68	1437.01	1622.63	497.034	2240.37	1192.43	1173.96	1086.91	850.071
411	208.461	192.799	71.835	151.896	171.674	359.272	135.084	144.563	170.369	562.644	328.044	529.981	211.621	259.568	217.216	135.542	69.46	257.933	144.943	444.809	152.818	386.524	166.971	103.656	220.011	112.093	176.822	246.683	266.695	233.441	187.958	199.695	178.846	342.175	178.904	198.461	197.33	132.375	408.001	240.985	101.859	719.74	712.121	462.36	660.596	494.999	393.665	469.048	312.839
412	220.808	224.882	79.1863	117.689	272.456	262.736	160.691	159.018	434.303	252.609	600.979	374.149	235.676	153.676	140.83	161.734	100.431	78.7138	206.524	246.762	139.908	212.393	230.316	69.4363	394.826	118.214	142.882	265.084	270.426	339.512	306.496	159.278	230.028	263.94	139.308	189.903	371.007	200.561	215.72	216.33	100.776	339.895	306.033	378.094	404.405	550.403	697.271	263.15	155.046
413	79.0713	156.128	119.819	147.327	137.364	142.269	263.08	165.507	72.53	268.193	972.74	139.294	244.94	154.89	179.801	89.1162	120.444	93.5138	82.9375	204.534	289.371	223.833	69.1025	81.8425	211.15	230.727	272.952	501.884	314.306	335.371	515.204	185.279	348.837	397.376	194.5	164.62	266.121	271.014	124.486	201.426	169.764	189.915	217.089	350.142	94.8912	648.819	300.973	221.291	237.84
414	242.475	631.619	193.951	194.606	234.154	305.256	239.389	233.689	219.207	617.388	846.504	376.454	410.49	359.283	512.373	132.924	100.625	69.0952	109.658	372.72	283.501	525.798	203.435	70.4143	451.84	295.746	376.255	347.758	910.763	787.843	573.013	301.379	277.487	213.592	273.576	82.0179	594.812	129.221	426.751	71.1988	134.619	464.892	328.955	634.968	874.56	208.527	231.699	667.933	200.679
415	884.425	3510.47	1299.72	2029.47	423.889	468.495	153.526	936.816	404.173	1840.32	134.197	3159.06	679.808	1419.18	929.467	523.832	143.04	138.179	134.904	527.087	216.136	2202.73	68.9387	76.8612	126.245	289.741	698.053	635.38	1090.84	562.278	4432.09	578.247	199.6	1341.51	826.705	163.216	424.205	157.566	2294.55	916.372	999.619	1930.1	3564.24	393.175	3396.84	398	248.996	2529.7	1756.99
416	334.261	369.873	277.874	258.394	187.12	195.096	500.656	358.769	740.952	491.853	873.791	502.93	286.921	183.234	206.364	78.1338	173.84	187.53	319.285	359.855	381.15	453.517	86.8	68.6825	249.096	221.035	175.351	344.995	519.003	535.268	468.069	237.81	200.446	351.92	219.458	141.135	501.44	118.628	104.235	212.64	106.875	415.488	513.433	470.288	476.689	510.373	296.09	231.368	280.558
417	393.195	446.983	199.952	142.614	548.941	244.579	331.197	259.181	219.479	835.133	1695.74	420.461	296.228	201.879	319.919	152.352	116.366	140.757	138.456	356.08	677.865	601.151	249.574	88.2475	592.17	515.597	433.837	880.909	1256.06	1206.09	807.08	741.755	403.298	1014.2	400.011	272.201	737.821	256.454	279.368	68.66	148.637	580.93	858.163	973.556	1917.61	792.09	1795.68	1381.47	234.653
418	608.096	976.238	381.32	502.291	425.413	218.358	268.962	253.197	594.728	476.938	665.691	931.261	451.358	308.846	616.809	269.995	119.734	151.649	312.613	170.067	539.003	813.346	155.871	68.6184	777.325	479.489	528.499	1137.8	722.82	1022.02	1100.09	308.368	222.163	992.495	551.649	420.959	468.212	326.468	463.655	511.896	737.549	624.351	944.817	538.464	1506.2	793.736	1009.76	1258.2	396.27
419	134.786	325.055	120.339	179.84	272.59	241.834	281.98	244.128	112.473	726.455	651.914	367.401	252.306	250.785	256.876	229.071	86.0888	232.424	119.791	418.688	207.795	503.03	187.958	162.123	244.705	150.156	248.336	268.137	574.201	434.724	377.55	217.286	202.409	268.64	113.769	107.726	448.59	113.537	446.614	68.5763	141.012	636.566	129.006	517.885	824.959	187.024	260.78	541.57	145.216
420	150.977	331.538	97.9788	102.203	188.91	145.605	137.143	95.8063	116.434	333.565	604.675	225.959	275.195	145.104	243.335	125.098	88.7475	105.007	145.769	209.751	427.356	487.341	161.451	67.9587	329.181	261.077	312.375	624.311	918.997	724.581	620.435	366.484	326.825	569.006	213.684	241.091	341.445	297.178	280.316	420.999	140.785	289.155	638.327	559.031	976.591	755.663	654.899	522.033	311.555
421	646.561	428.696	304.814	390.928	314.876	216.648	515.54	411.257	728.768	355.521	1387.35	932.605	308.944	285.409	333.114	135.632	593.585	612.696	328.144	397.171	649.811	671.745	235.231	190.786	316.266	285.293	319.406	501.765	619.225	766.564	362.632	309.191	326.014	388.115	339.744	232.128	519.293	188.451	122.8	258.428	67.9175	445.228	429.614	472.224	494.085	630.651	213.455	386.26	318.52
422	316.587	568.508	212.111	185.165	346.976	331.904	368.289	424.837	212.771	896.533	1167.54	671.247	239.776	272.676	322.933	114.725	68.735	75.0425	134.943	450.831	409.897	808.308	172.563	67.9038	379.337	285.501	332.184	523.735	899.403	633.996	762.576	301.723	377.57	511.202	268.699	199.565	829.784	179.161	512.295	329.879	186.426	508.125	1063.29	563.711	968.195	691.61	744.229	909.691	537.866
423	621.082	429.709	425.356	628.65	297.294	249.112	364.168	347.878	510.938	264.818	216.919	260.482	327.878	314.594	611.904	211.118	181.369	103.481	256.54	167.803	527.459	563.219	77.5721	67.7515	376.96	387.718	309.559	847.169	680.496	732.675	1001.1	111.775	180.212	406.138	206.787	160.61	159.401	125.925	336.168	282.543	226.238	389.162	391.69	282.853	816.446	435.981	454.422	430.191	247.894
424	133.651	478.949	67.14	100.236	287.285	141.089	190.625	152.359	268.511	833.929	1184.42	392.558	228.65	224.259	148.126	137.274	112.018	232.393	129.625	360.245	385.228	750.265	250.56	115.088	465.26	372.7	515.059	835.691	1269.24	997.102	542.296	429.363	353.045	802.749	284.125	271.973	345.995	444.845	502.289	415.071	138.609	419.158	1023.61	1071.76	1335.83	572.6	1376.57	1123.39	477.429
425	169.02	285.044	67.1188	216.428	474.429	302.841	302.19	322.123	534.345	565.732	950.386	546.337	210.635	231.259	606.535	323.056	265.961	235.012	274.895	379.494	146.667	251.946	487.524	113.993	370.642	153.285	187.824	460.119	434.108	294.021	446.788	476.805	582.058	339.269	325.563	385.699	224.066	269.546	364.226	269.512	229.658	374.897	737.664	595.215	496.499	473.074	820.969	425.399	261.679
426	164.712	344.833	156.171	182.914	267.314	315.446	258.846	351.069	881.648	416.331	931.189	465.538	391.158	210.936	546.996	126.814	173.256	125.296	341.58	301.63	350.545	285.482	245.773	66.9667	552.067	254.527	194.426	565.755	502.514	609.436	728.044	556.173	454.161	693.349	364.725	707.648	454.676	355.783	280.527	432.708	252.936	629.4	1068.42	908.965	577.367	1302.07	1073.75	500.95	281.918
427	393.865	324.96	101.035	233.923	380.235	303.943	480.268	505.338	661.698	457.919	1159.13	488.365	416.769	444.648	501.413	445.099	333.645	154.673	657.502	442.705	918.969	345.955	300.523	66.9524	866.717	162.726	305.07	813.342	677.139	629.46	851.95	326.763	459.202	758.901	313.04	472.452	520.165	667.026	258.282	293.787	134.912	425.052	472.701	743.08	674.199	809.236	973.288	121.064	81.4298
428	439.739	702.569	92.5913	322.154	141.435	167.499	461.009	253.529	591.008	194.905	1312.25	1088.18	282.96	241.096	194.214	249.273	333.75	326.486	236.037	211.155	717.298	505.059	116.204	80.85	419.996	401.103	333.151	645.538	1132.18	988.449	385.071	486.137	598.181	520.295	486.996	321.535	494.012	296.745	66.9175	600.024	142.363	488.494	963.862	1543.01	888.134	1462.64	813.589	393.341	303.169
429	438.046	543.438	531.793	705.015	222.235	187.454	221.069	275.035	304.049	297.088	290.757	536.331	304.282	337.64	567.985	312.588	178.484	169.04	216.522	135.541	386.35	585.587	179.015	66.8147	435.378	484.726	218.157	643.403	567.307	682.196	740.003	72.2044	148.437	694.185	256.059	145.394	404.799	114.915	761.678	523.425	458.047	758.859	787.241	439.241	1236.86	541.581	769.54	618.709	654.304
430	123.34	241.66	66.7562	145.28	194.735	215.118	205.18	193.889	824.558	371.275	733.74	410.277	269.486	264.08	279.135	278.165	209.234	169.229	295.075	225.322	411.818	211.65	336.171	68.4688	523.661	141.034	137.231	423.058	286.876	461.392	485.274	296.512	409.262	433.161	223.091	550.191	223.023	467.42	210.664	316.524	203.683	450.757	971.535	1197.62	533.091	1179.93	1245.91	417.034	193.29
431	303.538	404.73	134.558	162.468	293.814	210.339	200.031	315.473	471.293	411.396	755.55	385.079	482.181	247.105	507.186	121.416	207.47	165.166	288.821	273.471	282.288	389.623	386.79	66.7412	673.251	266.943	256.435	440.439	415.92	555.45	707.544	485.41	395.9	801.896	259.646	374.98	344.741	453.406	411.286	568.436	236.054	602.355	914.889	1317.62	841.087	1142.21	1135.74	495.072	284.721
432	212.857	201.601	138.239	222.241	405.533	291.43	253.134	304.003	432.954	475.361	776.875	425.569	292.673	226.09	511.92	174.813	236.294	169.831	279.87	262.926	235.778	303.256	279.215	66.5238	501.114	162.364	177.564	412.676	529.576	466.954	552.009	441.966	448.596	433.113	298.57	373.279	344.598	307.115	313.205	215.748	173.614	415.884	821.258	599.276	659.549	644.475	752.65	460.046	203.403
433	655.964	720.605	487.457	599.102	361.445	147.836	258.11	183.325	988.043	260.809	416.418	821.6	414.238	314.846	714.411	872.246	207.77	88.0662	346.594	99.975	508.925	627.426	320.913	66.5125	880.279	703.403	461.998	895.525	1358.12	573.89	1526.24	192.21	238.466	382.655	480.515	263.466	590.518	234.542	597.222	914.46	876.094	387.561	678.929	515.558	1159.51	935.069	1447.03	549.204	304.902
434	474.461	669.284	415.581	593.997	302.163	190.059	285.97	273.156	624.339	429.577	295.827	916.216	335.18	288.381	495.808	277.529	129.316	120.761	280.255	183.336	523.991	670.176	178.131	66.4712	465.529	319.614	406.007	882.625	877.48	736.311	972.966	106.099	189.785	863.293	286.5	247.898	807.378	165.018	593.1	506.901	504.664	689.19	646.156	401.834	981.399	569.92	623.702	589.285	533.001
435	288.426	340.194	258.173	236.22	219.314	118.894	223.753	232.83	123.281	419.418	572.097	265.104	194.13	155.664	378.145	95.9275	81.8863	101.459	69.545	225.175	393.885	615.866	195.398	66.4	319.053	216.018	206.852	437.96	673.974	490.527	547.023	177.551	250.321	408.374	194.299	129.054	535.423	132.91	208.269	202.344	110.765	338.865	272.483	385.531	400.642	391.38	576.452	519.925	354.18
436	290.675	475.904	152.95	226.296	104.445	129.235	276.84	202.976	149.271	193.576	539.531	496.349	125.346	145.664	198.667	80.0675	335.421	377.676	110.603	187.363	298.544	557.326	115.579	66.1838	269.311	286.31	300.006	247.726	666.329	676.722	615.471	425.295	321.349	363.469	349.785	214.903	244.81	256.164	124.21	410.919	116.676	429.241	794.516	1137.58	850.249	1050.84	563.085	434.098	330.378
437	130.209	646.191	632.766	356.707	373.066	526.591	157.744	982.212	292.754	949.783	403.326	1262.95	315.272	416.161	766.491	478.058	223.106	67.1175	258	733.271	118.144	471.663	245.54	83.7763	216.123	106.234	111.495	321.301	365.189	482.574	2233.35	828.523	110.878	640.645	387.756	321.04	65.5713	219.97	829.64	339.943	305.406	479.327	2865.82	664.178	991.742	731.957	703.461	648.091	516.539
438	184.859	268.014	266.496	170.975	111.723	114.441	287.196	232.968	210.29	234.424	664.29	483.909	262.897	123.631	183.903	83.6612	212.461	135.414	141.118	159.735	185.09	304.235	71.1063	65.4688	167.471	196.879	166.446	227.814	424.488	432.17	655.164	377.626	149.96	351.011	228.575	139.644	67.74	93.3588	110.499	266.831	148.46	321.048	323.019	280.65	451.183	243.996	242.644	270.275	310.188
439	606.038	1038.99	377.623	639.815	191.218	159.223	316.335	267.73	677.31	451.462	275.415	881.063	315.892	391.13	591.8	302.39	177.4	194.075	261.938	158.885	595.967	1137.35	244.253	65.2825	634.678	644.553	743.143	910.737	1362.65	926.32	1795.96	317.085	269.632	624.418	689.595	404.012	554.808	285.98	1217.1	675.893	817.755	701.295	1434.17	877.803	2095.32	661.362	1447.6	1041.54	675.237
440	255.864	302.604	69.9437	122.063	258.784	129.706	213.27	218.908	1447.9	317.971	924.614	303.652	344.483	227.799	643.612	416.096	233.735	195.572	506.433	210.595	439.515	245.958	358.248	65.2338	717.589	331.015	287.771	896.514	574.345	656.855	489.379	518.935	596.889	733.459	484.644	659.276	335.671	696.391	259.444	640.43	198	365.762	1067.5	1506.09	673.584	1316.86	1782.51	448.571	145.891
441	513.225	683.056	414.049	308.46	240.95	162.7	327.079	273.941	180.998	421.876	943.469	607.822	463.214	287.267	311.661	65.2262	359.441	556.669	367.069	233.636	512.914	659.55	177.072	171.75	534.197	248.795	199.169	392.538	639.04	498.467	412.639	310.105	263.168	555.83	303.507	186.18	522.059	148.796	137.738	438.613	272.889	508.111	533.015	754.035	513.318	664.076	429.447	289.256	304.601
442	911.935	1029.43	1516.83	1381.62	891.744	745.904	1488.17	820.514	2200.86	1653.77	1265.35	2148.4	816.617	616.25	1210.48	964.515	65.2212	112.223	1261.48	863.911	753.597	729.936	122.724	107.199	694.271	463.988	590.139	964.018	1616.58	1211.49	1180.52	236.12	354.84	747.741	351.256	348.329	2238.64	342.918	761.803	615.202	418.055	726.462	850.261	703.65	2290.97	490.266	866.679	834.266	670.099
443	268.375	310.026	293.071	188.55	278.95	303.994	269.255	415.637	397.387	605.86	1146.29	369.298	184.959	132.351	292.779	155.084	65.2175	78.385	197.989	403.019	363.188	455.618	127.435	75.6725	312.295	257.178	258.22	440.861	842.635	555.091	523.036	277.099	326.055	479.11	172.034	152.14	973.303	160.931	181.113	203.874	102.823	227.993	463.762	417.49	581.163	403.882	726.911	592.899	239.064
444	612.389	573.188	383.998	391.856	740.215	308.94	774.693	534.67	623.516	519.837	775.345	689.42	449.075	662.741	862.638	650.984	338.061	128.058	645.545	334.152	1295.82	639.284	563.73	65.0325	1721.93	383.921	516.683	606.617	844.232	1640.94	1736.38	794.497	904.606	1091.89	854.763	1372.03	551.17	1062.91	633.482	1084.85	330.288	432.799	751.654	1072.78	951.286	1496.74	1892.66	329.966	401.649
445	71.9875	405.163	78.22	83.28	213.339	125.818	153.194	103.749	64.93	627.235	952.999	323.506	198.641	141.007	100.36	93.34	133.914	120.677	82.7163	265.774	233.159	349.332	144.574	67.3025	296.281	235.968	317.219	306.091	660.316	643.129	505.509	422.655	277.49	499.06	103.045	190.939	779.459	256.925	379.38	256.971	134.534	510.615	1104.65	946.009	1217.34	589.212	1626.81	1208.57	590.952
446	250.301	383.563	215.736	319.321	149.035	144.956	238.142	250.632	310.655	282.844	598.798	505.799	225.664	224.823	230.433	147	257.051	240.954	235.758	237.326	357.471	373.695	138.732	64.775	281.514	224.015	199.637	400.657	498.532	553.532	322.076	204.437	223.048	265.263	224.067	130.29	406.013	106.59	132.865	271.799	120.015	400.973	539.72	476.682	803.199	635.214	393.686	294.824	283.038
447	509.205	534.207	126.454	227.176	162.713	66.3912	335.414	209.401	454.717	281.962	1437.19	692.325	229.946	201.357	365.115	186.975	287.289	183.395	330.556	148.945	719.775	420.721	164.639	64.6875	353.61	347.95	290.707	538.005	934.83	1061.34	460.094	383.738	318.789	295.103	417.146	248.1	410.795	283.161	176.474	587.46	186.239	356.63	872.904	1159.94	701.13	1025.11	726.102	280.373	326.087
448	314.985	452.571	150.336	197.594	137.026	222.369	266.507	229.702	304.846	310.642	872.089	472.99	217.676	256.26	236.123	92.0837	166.019	275.895	259.696	241.864	851.008	625.881	71.0387	64.6563	290.545	214.919	193.065	347.346	611.836	546.521	294.022	174.841	172.994	629.617	371.489	264.516	478.374	298.431	194.336	280.544	190.169	1119.76	1518.65	1244.98	884.11	954.069	1102.89	1430.49	352.675
449	87.1238	354.58	64.58	141.376	297.376	292.923	242.71	480.842	570.837	550.884	413.556	575.68	143.738	127.621	354.006	180.373	119.048	247.54	186.276	445.745	141.077	184.894	334.644	86.555	439.761	232.684	210.615	445.601	295.426	509.632	539.044	363.861	327.783	668.255	197.635	490.875	208.723	497.314	410.424	304.105	178.519	504.795	1130.52	981.704	614.651	759.779	1207.53	790.616	306.647
450	215.96	208.29	76.4587	148.868	180.53	247.309	120.019	235.714	255.229	365.059	473.957	334.576	254.338	210.3	352.189	212.674	128.512	159.45	217.848	335.634	199.651	307.599	196.156	64.5588	310.925	130.834	148.006	265.494	201.734	300.85	402.83	186.755	198.794	404.326	171.204	315.345	192.869	265.015	293.701	217.756	150.196	523.029	468.499	656.516	619.339	999.355	686.168	421.717	225.613
451	148.779	957.4	101.091	110.36	416.105	229.174	138.771	320.262	99.0812	1072.53	1082.44	683.075	316.027	239.014	253.79	152.769	65.0913	64.4925	77.8413	471.676	196.981	802.681	84.9425	64.5	260.506	184.151	271.965	349.255	625.508	770.523	620.359	700.445	173.813	508.836	195.338	198.194	207.721	229.625	607.798	297.666	157.804	325.639	1864.12	1000.45	1377.06	443.071	466.604	1295.8	711.342
452	455.948	489.483	223.396	236.245	186.502	158.992	350.342	368.262	350.554	322.83	842.106	651.888	314.573	231.033	257.558	131.38	242.86	282.738	230.664	276.411	429.486	577.046	160.687	64.4845	299.35	266.781	230.282	379.837	706.738	557.818	714.438	301.707	300.39	371.968	320.512	164.485	464.779	142.252	115.474	348.794	100.55	597.071	955.199	749.212	854.546	742.842	428.712	367.143	389.585
453	363.489	275.071	330.525	267.224	302.135	284.741	275.296	340.955	299.226	338.205	557.732	384.509	205.412	230.979	519.215	215.586	129.394	177.223	300.631	292.47	288.693	305.125	201.34	86.6188	112.246	64.48	74.77	111.109	111.82	114.454	164.626	99.67	77.4862	191.249	83.02	139.569	125.366	118.384	331.1	222.488	93.9838	250.238	443.887	364.324	316.736	281.503	534.918	291.226	123.328
454	690.316	737.159	624.671	495.921	315.661	377.642	1031.6	542.303	1572.16	662.933	1804.72	895.774	388.231	289.039	317.269	222.963	199.574	184.266	454.051	586.479	1186.25	779.614	91.8375	64.4525	258.998	233.715	248.387	413.946	863.191	834.332	437.69	373.331	322.076	352.876	334.131	223.803	1104.53	197.544	97.8462	214.866	144.849	248.393	499.161	615.263	320.082	426.163	307.514	243.076	211.02
455	140.637	260.138	69.8071	147.324	304.419	197.019	233.364	258.492	393	314.612	787.121	372.224	214.35	157.72	345.699	201.398	101.269	158.302	254.99	315.865	109.174	139.965	311.279	64.4214	462.127	130.518	131.689	461.724	200.788	372.3	475.454	390.912	355.375	481.233	276.798	497.17	145.268	451.543	258.286	337.938	246.468	422.657	902.519	648.277	551.806	856.144	963.705	462.857	206.194
456	218.994	619.367	133.335	485.044	386.341	148.41	222.465	105.911	1181.82	778.53	185.549	823.683	246.505	238.455	309.207	141.576	69.5625	150.235	805.247	155.521	682.043	569.393	91.065	64.3925	454.38	207.545	191.951	450.631	743.405	416.359	194.928	123.509	114.935	299.103	170.805	162.864	1540.62	254.503	674.659	369.65	748.434	548.646	832.982	480.087	815.734	764.255	2236.03	790.284	412.506
457	531.906	514.69	372.485	379.026	317.204	275.149	655.12	367.254	977.239	501.949	1216.49	610.737	305.387	239.906	276.959	206.74	185.64	229.618	348.686	441.275	664.125	540.862	70.6025	64.3675	304.928	316.863	248.208	534.504	1106.99	826.899	627.991	351.999	398.856	436.771	315.277	179.499	1193.06	164.594	82.9437	224.673	91.3037	435.433	634.415	664.71	603.394	596.066	486.511	316.14	276.746
458	607.627	1588.85	166.21	520.296	427.139	195.918	440.904	405.848	1128.76	486.052	311.54	1105.82	268.726	349.893	630.751	1049.84	130.99	199.093	469.294	234.124	866.096	1010.09	102.958	64.356	1507.68	764.043	724.512	1159.93	1910.26	632.025	1095.37	241.487	255.582	663.558	640.636	299.549	1294.95	497.294	959.283	808.396	666.054	1209.08	1564.68	1084.31	2268.96	1147.91	1810.09	1417.94	542.317
459	313.931	428.696	303.47	266.655	260.57	173.236	378.001	398.467	409.764	405.65	1333.84	856.818	343.564	201.524	368.726	104.223	332.663	242.895	313.524	270.201	459.091	337.756	119.536	64.1775	246.755	259.717	303.608	563.666	763.77	793.054	876.751	721.316	278.426	659.138	341.632	206.658	368.462	136.398	231.9	596.934	233.125	674.584	928.865	1192.89	905.319	888.004	513.6	563.622	457.369
460	87.1538	164.64	93.5962	144.446	416.544	526.364	171.868	443.9	307.666	441.63	315.825	528.315	159.42	173.76	162.475	169.864	341.589	74.4838	308.705	367.579	272.335	486.212	686.979	83.6975	591.686	149.311	124.184	241.651	338.59	962.731	935.889	304.394	186.416	193.109	65.6375	274.114	176.274	140.89	353.904	241.244	112.302	322.765	654.019	310.342	464.046	450.385	792.069	568.97	155.083
461	262.988	665.61	191.19	214.507	457.868	208.303	467.983	249.115	242.359	677.144	2004.94	429.836	466.491	233.934	414.92	138.624	107.093	63.545	189.444	313.159	598.658	647.344	153.426	84.2013	592.217	1065.58	623.271	1294.9	1701.41	1501.57	664.678	523.935	589.173	1273.28	349.986	599.441	1224.88	585.786	491.256	634.472	289.461	846.711	728.714	906.957	1617.12	1126.42	1449.86	1121.24	750.371
462	184.685	465.839	105.651	77.8075	147.844	149.905	239.428	238.945	84.3625	591.185	805.481	369.654	209.894	194.674	245.325	286.025	63.4213	133.572	92.7225	262.516	252.301	429.834	215.075	119.049	227.749	227.334	257.029	340.079	803.856	536.549	374.988	292.911	269.58	207.311	222.71	134.866	551.956	218.7	367.119	315.136	217.225	322.646	672.075	447.373	1011.64	406.959	688.094	813.076	425.34
463	138.379	242.491	152.536	214.431	212.169	121.429	281.789	276.72	87.8588	540.51	663.097	367.358	261.389	217.11	353.04	167.58	68.9087	70.1462	67.9287	201.568	227.79	450.504	248.539	63.3775	259.249	238.319	253.859	335.634	555.036	497.255	459.512	181.906	231.298	299.249	160.184	158.311	538.02	153.271	179.181	176.059	101.371	226.183	513.264	332.147	1085.93	554.459	619.092	563.28	203.13
464	102.445	77.4125	63.3225	100.106	160.814	143.211	86.3863	114.156	279.009	227.039	330.456	277.017	169.292	149.841	217.107	345.784	295.493	165.706	220.58	149.171	168.794	86.9813	370.705	99.4762	533.289	131.225	152.202	368.784	202.394	432.869	402.854	157.298	237.084	168.651	150.779	295.974	70.3625	360.166	218.135	293.54	98.6025	249.25	249.815	574.651	289.467	774.819	522.535	74.0962	115.129
465	177.637	577.844	104.785	375.923	212.248	108.843	260.031	138.964	259.694	389.21	293.184	589.234	243.395	187.274	288.77	211.615	97.8525	112.17	150.408	129.444	347.244	397.734	91.4587	63.0463	644.774	229.593	248.455	455.206	543.95	476.399	650.181	144.43	145.439	393.717	226.514	177.303	318.548	252.132	310.111	327.267	354.429	437.461	809.023	454.748	831.136	355.916	729.638	717.1	370.663
466	231.19	164.617	143.736	117.24	171.38	217.952	144.981	166.419	292.558	264.082	402.895	310.487	208.435	185.174	377.363	356.56	174.596	142.921	163.464	249.645	174.907	226.948	319.718	62.9833	337.067	157.392	161.89	317.593	312.857	313.783	376.183	183.101	210.667	296.144	174.479	321.348	152.455	301.668	241.056	251.213	97.0452	285.086	296.049	553.561	436.888	394.679	508.401	103.798	107.406
467	584.494	902.884	62.9297	335.159	1305.45	246.008	1051.13	208.617	501.597	1175.87	2188.34	610.883	1264.27	879.891	727.406	1214.92	341.953	356.15	410.769	573.813	1049.7	776.173	1980.31	484.122	805.611	1450.78	1262.5	1969.86	2713.63	2508.16	1206.24	1093.76	1131.9	1178.8	720.414	1088.43	924.661	1826.5	515.523	966.097	410.07	240.234	729.359	1953.14	981.466	2190.35	1783.01	533.133	631.894
468	190.732	241.071	317.73	99.6088	218.285	106.386	242.135	114.354	98.0687	380.536	472.015	304.964	184.273	199.202	174.2	498.881	181.981	68.265	62.9075	125.685	302.369	394.243	375.738	111.579	274.769	236.3	259.762	365.546	585.933	581.134	366.675	155.005	201.734	329.161	140.369	125.325	370.553	193.833	232.491	279.884	64.31	138.034	114.144	298.647	539.079	295.568	500.466	238.395	136.604
469	140.576	185.313	79.6988	127.821	196.725	209.589	76.5913	236.891	265.279	363.915	410.535	211.55	142.669	247.908	263.945	125.116	114.302	134.391	191.065	304.36	243.119	297.973	127.075	62.7037	271.459	108.886	104.816	295.771	119.131	208.275	234.908	138.634	155.666	187.559	137.44	207.206	115.748	240.239	238.616	135.144	96.1038	411.072	400.853	488.391	430.464	484.455	638.251	256.925	229.102
470	217.482	227.95	62.6613	103.615	215.904	168.916	156.351	265.061	162.481	255.96	449.991	227.179	273.901	180.605	232.118	83.9163	166.719	211.235	178.756	196.266	225.835	233.238	224.314	103.245	358.755	150.791	187.968	394.467	270.353	344.671	335.176	247.748	230.509	434.441	171.909	290.3	312.933	282.33	297.461	195.65	143.26	454.995	392.771	454.956	458.664	715.545	596.546	235.556	152.616
471	258.179	612.577	244.202	539.971	180.518	111.713	326.984	286.236	824.185	276.586	218.511	932.263	229.664	266.991	440.646	549.693	116.326	146.399	226.833	110.781	867.316	510.767	124.858	62.3687	494.83	339.084	366.759	671.855	893.321	749.084	1332.05	124.764	159.131	508.803	463.264	288.916	431.071	433.834	473.399	371.785	365.67	327.244	700.325	749.425	939.449	662.51	882.754	664.492	222.102
472	359.934	501.339	380.635	218.859	332.821	334.512	358.109	443.329	281.951	823.261	1586.9	547.435	354.49	286.59	512.019	235.106	62.235	105.973	186.635	405.901	664.146	629.145	209.593	112.444	428.191	309.796	409.446	437.522	1066.76	726.923	677.791	352.165	385.24	561.393	268.952	281.586	1100.21	283.288	343.014	352.286	208.321	471.074	794.491	529.816	995.336	779.669	1393.74	1028.86	485.119
473	186.714	326.355	62.0575	136.368	363.644	246.125	165.688	244.62	342.775	478.069	746.52	403.101	235.996	236.754	332.231	118.349	121.76	208.023	232.158	286.585	298.363	314.087	232.443	99.4762	508.973	240.15	165.511	384.327	280.024	443.99	504.632	280.897	294.293	558.711	259.435	364.455	255.404	488.491	369.119	282.23	173.544	797.136	948.872	736.548	1018.48	939.261	1204.27	611.337	271.529
474	282.188	1262.72	184.77	644.35	180.561	115.736	429.55	173.4	289.026	299.4	105.596	692.909	503.626	366.275	709.697	737.889	74.2675	146.077	126.076	88.8213	275.433	652.12	61.9162	73.665	495.183	393.144	504.74	625.403	801.826	531.131	1599.7	264.081	200.648	505.065	250.419	279.369	757.791	153.029	499.075	402.644	347.701	90.0175	1073.6	803.783	1536.44	683.309	1393.81	1302.09	580.545
475	356.175	383.519	177.803	253.271	139.376	66.28	411.584	294.72	428.621	308.429	1026.26	634.568	353.541	300.471	272.834	283.24	454.559	279.651	310.738	200.973	538.446	394.873	200.124	66.9663	423.424	297.195	318.139	460.154	795.245	947.686	763.308	356.965	283.739	506.962	382.397	216.101	382.483	241.024	159.83	552.58	169.201	429.916	642.081	857.039	720.095	590.077	404.505	271.822	293.522
476	307.776	227.58	209.715	196.91	401.146	341.626	292.163	299.069	1036.34	619.658	870.525	451.475	344.536	271.456	390.988	274.916	205.721	267.436	471.66	628.02	261.526	259.021	262.834	157.944	215.164	99.7662	118.906	217.115	286.111	360.596	370.212	112.048	132.381	253.645	132.378	175.446	449.394	207.148	113.438	198.818	66.05	274.809	142.814	233.655	253.359	266.1	453.669	263.967	61.8137
477	220.736	370.984	86.1587	121.278	221.719	103.821	210.274	104.834	146.945	438.451	854.265	258.764	394.149	255.401	216.491	282.369	337.529	157.611	61.6638	230.649	459.774	473.42	289.199	75.1488	408.681	343.402	409.288	619.227	1079.25	980.671	620.061	383.114	289.933	491.67	244.165	318.389	359.189	481.586	287.603	397.701	82.445	166.189	718.117	900.949	799.115	625.168	1061.23	607.107	263.255
478	379.084	438.331	137.824	358.686	193.349	70.39	221.515	168.821	806.541	238.769	259.579	455.58	132.176	138.006	215.464	190.71	118.729	143.711	228.265	61.6575	648.295	370.272	155.185	97.4963	314.691	339.429	305.789	681.351	707.311	558.085	551.499	124.535	176.116	493.563	390	361.392	530.841	250.369	346.836	422.235	459.344	431.207	591.697	777.587	1015.11	529.06	879.403	649.237	251.283
479	197.322	313.794	214.029	138.958	354.61	224.225	284.429	313.509	317.825	834.232	1451.8	365.556	235.26	144.001	260.001	184	96.77	130.371	182.974	406.592	364.221	360.549	194.38	119.061	335.41	214.189	288.031	510.663	743.701	498.174	358.978	188.406	275.276	452.336	166.399	160.095	796.659	172.977	195.161	212.191	61.5988	255.396	329.541	408.244	542.22	331.815	553.205	646.034	236.41
480	161.701	243.124	61.4712	113.356	318.533	150.155	170.618	246.568	533.255	377.58	729.376	380.136	251.162	150.591	421.071	264.413	106.427	144.73	288.406	258.72	167.868	166.62	298.426	80.2387	394.051	274.039	233.941	385.32	345.411	408.76	439.184	355.144	343.565	526.087	317.706	401.152	239.059	401.944	325.299	365.717	189.94	518.77	626.322	567.655	495.322	1193.69	932.009	387.334	222.846
481	426.558	440.829	158.879	203.666	103.15	121.055	260.201	365.406	215.318	342.251	808.379	527.114	297.111	247.524	420.801	61.4325	225.37	423.569	201.03	205.981	476.864	753.02	93.7512	112.07	286.685	163.83	145.356	332.822	402.861	399.568	440.336	253.819	205.901	355.044	280.815	103.071	216.584	73.345	82.6988	333.354	96.7537	660.086	763.003	812.523	852.629	803.508	533.489	237.191	370.305
482	166.174	358.499	61.4038	169.607	385.381	239.518	310.494	347.74	980.426	433.915	1449.82	413.165	376.876	229.634	472.729	410.354	284.637	181.396	482.411	289.996	435.88	202.176	636.099	91.6988	784.069	259.479	249.476	808.47	491.155	719.854	659.91	429.058	708.862	613.631	405.366	815.634	327.342	770.669	300.179	425.059	249.55	531.806	1314.1	1456.4	747.161	1917.79	2539.43	568.299	224.906
483	173.035	255.415	365.671	505.296	201.539	272.844	383.293	336.186	203.274	323.764	717.327	874.582	413.299	342.339	262.652	175.504	195.952	189.988	205.856	245.494	260.991	415.053	96.8063	61.3625	456.731	212.441	204.651	316.406	674.669	424.03	531.622	283.711	320.334	472.216	293.004	160.166	325.241	100.916	98.8	332.279	124.961	558.864	808.957	662.979	848.34	746.471	587.836	300.83	276.836
484	392.924	490.24	269.299	549.16	242.792	159.476	329.386	384.558	222.704	321.279	254.256	508.822	299.123	233.105	345.575	192.921	108.35	158.444	238.634	117.379	382.205	509.397	102.564	61.3387	456.061	216.36	230.414	732.987	654.435	451.855	673.101	95.7375	150.275	644.419	211.526	135.053	552.018	119.72	653.656	469.408	441.809	684.116	603.951	509.081	1137.98	527.168	720.965	571.88	555.671
485	862.616	2135.03	89.375	100.458	647.487	498.781	272.679	373.397	576.656	1661.73	2040.12	1435.76	299.154	150.205	539.956	98.7387	382.387	368.575	398.296	831.674	1481.52	2488.14	422.918	127.289	285.385	267.087	982.574	1631.14	1464.99	2445	3358.5	1337.8	553.026	1127.47	652.48	590.091	193.744	702.589	1898.37	550.408	478.875	1380.26	2153	3113.13	3138.78	2139.09	653.788	821.304	1156.58
486	376.935	496.674	440.309	224.635	400.189	390.856	415.34	526.669	507.105	880.205	1739.89	552.675	264.563	160.985	383.47	260.215	61.2013	80.815	222.996	547.9	433.946	504.521	132.025	78.2163	431.909	246.795	316.615	501.191	1097.06	666.754	551.435	400.55	314.813	506.789	185.093	183.304	1422.88	184.37	154.595	137.667	104.944	185.061	409.681	362.142	568.764	475.159	768.016	593.394	254.63
487	142.123	231.101	106.565	136.994	268.39	217.602	163.489	244.202	226.459	336.341	414.829	281.473	266.604	153.23	320.582	93.6813	138.244	115.123	177.688	259.196	198.184	249.794	129.579	61.1575	339.553	113.208	113.276	280.626	203.061	269.842	283.484	284.33	230.521	431.89	141.075	261.449	288.351	225.787	267.827	181.531	124.229	485.689	530.124	463.911	428.43	567.212	559.571	321.526	198.852
488	341.413	401.08	304.09	472.723	251.419	160.81	288.675	443.589	712.286	468.436	486.519	507.257	442.249	282.841	641.898	233.183	173.83	164.459	423.596	156.352	469.069	648.202	276.249	61.1013	467.219	364.967	540.92	609.285	506.201	574.7	1915.53	182.577	138.615	551.17	368.396	332.866	359.408	164.386	689.385	503.806	1009.96	552.249	807.864	998.059	994.646	1388.93	809.126	1045.48	302.271
489	353.85	569.15	138.851	272.906	142.336	111.931	445.481	194.558	1007.23	226.662	1372.48	758.156	316.047	171.574	276.283	101.565	359.629	297.015	246.775	148.268	584.589	469.021	127.743	83.8889	316.815	473.046	532.519	457.529	1279	1416.35	607.599	619.265	495.792	454.814	397.906	371.246	641.936	354.022	60.8306	541.089	154.418	281.836	805.185	1309.49	759.237	1056.13	917.839	323.333	237.814
490	255.014	347.141	60.7687	137.25	241.976	222.338	255.23	407.596	428.18	367.146	620.107	343.784	430.788	337.897	608.6	467.38	172.825	246.325	405.134	351.246	232.699	302.019	511.152	105.21	645.023	249.466	234.803	523.655	356.174	785.643	395.664	281.099	455.582	414.479	236.569	365.069	385.815	676.054	337.109	449.11	249.695	568.019	540.006	1185.38	550.509	1028.43	1917.52	390.454	244.183
491	259.859	392.779	326.491	250.226	456.723	315.933	250.664	508.255	563.541	717.235	828.036	615.534	255.279	374.473	1077.99	322.261	192.57	181.87	325.454	468.856	222.006	401.517	108.699	60.7088	665.325	203.584	279.983	448.951	413.61	402.865	1236.51	642.43	551.421	783.625	456.701	553.685	368.842	687.195	555.749	601.04	406.952	566.8	1024.83	915.934	718.51	1046.13	1017.74	491.94	388.444
492	148.525	240.34	139.563	182.435	175.273	120.711	335.283	247.989	97.0263	442.641	476.51	192.226	266.063	187.776	453.098	174.166	99.5113	109.786	120.3	223.629	330.75	336.621	121.105	70.9063	396.845	225.431	283.512	383.1	742.09	595.496	595.775	278.071	277.723	416.04	196.144	143.514	645.044	183	291.902	60.605	135.361	349.298	235.526	616.2	530.715	322.108	324.467	255.79	263.462
493	624.426	1342.97	338.46	660.61	147.906	387.243	149.523	598.497	170.114	906.429	365.394	1747.86	304.489	1231.11	449.804	418.399	193.85	620.471	228.63	760.445	489.834	1270.97	79.3	229.045	287.23	102.507	144.409	254.694	286.003	241.356	261.011	175.815	147.2	241.739	214.058	60.5125	280.291	92.3175	437.011	201.148	93.0775	543.286	2161.9	302.895	1051.74	443.055	170.089	481.009	625.898
494	494.066	469.856	176.255	304.081	197.91	60.4175	262.033	435.146	263.029	425.156	728.381	398.265	400.824	341.534	451.121	195.023	201.227	240.925	213.495	287.923	398.113	790.784	148.451	76.1775	440.385	251.386	214.189	469.226	783.164	621.092	652.034	291.921	286.24	509.011	304.717	172.915	591.555	148.826	201.759	434.034	153.246	737.193	1039.8	773.072	974.675	731.39	525.447	415.779	432.918
495	192.246	325.543	101.4	128.306	368.7	111.083	364.083	123.361	450.612	590.481	1757.95	273.129	371.55	238.024	347.725	903.212	211.451	60.3024	158.136	172.062	466.84	418.627	471.267	79.2107	689.464	1073.3	788.487	1579.55	2431.39	1715.91	842.276	395.935	471.588	1016.38	323.5	578.48	615.901	926.148	331.151	783.158	202.86	208.792	276.085	1389.34	940.168	823.535	1355.32	383.962	286.701
496	381.674	394.586	195.516	321.428	157.779	102.191	257.019	188.015	615.895	226.839	230.124	432.966	244.946	167.229	330.473	287.149	93.5525	98.7463	297.863	91.0725	414.842	331.721	78.8888	60.3013	382.509	451.01	263.806	640.545	886.605	520.616	545.919	106.219	152.835	374.65	433.65	209.854	536.452	310.179	340.629	422.194	337.686	330.51	438.283	364.33	826.534	578.524	698.886	456.374	248.041
497	485.035	867.269	294.769	237.646	554.582	292.835	356.676	451.118	60.2925	1055.78	1148.34	478.805	824.204	523.12	364.541	157.569	327.498	498.515	246.42	441.896	952.414	1321.92	436.868	360.433	775.028	462.636	486.445	773.447	1200.47	908.683	778.967	601.764	481.689	849.174	281.141	402.08	1002.66	470.084	409.594	599.308	280.931	600.016	841.457	908.867	1320.11	943.087	1056.87	948.461	381.9
498	338.995	342.045	543.085	320.647	583.001	517.077	518.691	805.284	471.416	817.934	1052.8	499.522	285.923	156.755	463.762	504.035	60.5313	60.2912	373.146	740.861	446.111	447.195	77.415	74.7738	386.896	318.132	274.244	415.34	1165.27	710.605	522.629	334.615	348.188	603.456	185.709	227.505	1404.08	161.331	134.786	146.294	65.4925	116.186	403.642	417.738	489.022	345.158	438.064	529.325	196.274
499	543.446	962.765	60.1775	410.494	532.031	199.09	338.623	280.334	512.585	420.601	1774.62	1207.28	209.831	337.591	331.789	136.891	526.131	554.485	250.643	288.999	667.734	828.395	87.1663	87.3563	415.933	220.964	374.608	691.178	812.893	1163.36	466.316	521.526	575.106	322.176	554.034	231.833	419.728	204.419	103.375	476.134	179.62	543.798	1374.44	2016.08	1039.13	1287.36	934.3	479.396	411.103
500	204.798	345.914	136.572	176.12	381.566	304.267	314.957	332.59	840.03	613.321	3447.94	819.982	126.601	250.488	474.655	536.796	86.185	89.0413	427.789	268.604	311.891	164.042	958.023	60.0975	760.966	447.223	222.178	1147.52	522.939	492.105	723.582	355.851	673.441	1050.16	424.364	678.47	627.462	1112.53	395.6	1230.5	294.194	445.674	889.461	1888.14	676.636	1876.77	1597.55	397.771	241.769
501	235.429	375.668	60.0357	194.209	401.752	362.571	397.971	324.718	1064.04	632.709	909.6	433.984	308.332	256.239	490.918	361.029	85.6161	142.004	371.839	545.407	262.432	309.323	142.257	96.7036	528.618	246.354	270.357	597.629	633.193	628.962	353.111	261.514	512.804	1189.59	208.384	633.445	886.695	539.275	356.077	282.489	188.116	768.191	734.975	992.577	656.573	1024.77	1454.05	700.198	323.666
502	128.589	135.79	89.435	96.6388	243.886	201.588	133.784	192.025	321.139	287.196	462.309	228.898	160.786	120.944	243.441	102.914	107.709	127.988	221.909	241.75	184.626	149.981	210.912	59.8625	265.111	122.513	109.578	318.048	326.947	259.225	307.889	235.28	224.541	302.4	161.785	262.609	273.47	255.265	163.329	177.115	91.9963	360.337	626.347	540.697	427.267	692.572	839.961	350.965	196.029
503	438.034	425.41	264.731	231.286	244.68	134.165	412.098	200.97	393.014	372.171	1587.72	634.143	148.363	185.141	195.36	151.107	140.5	190.768	357.42	243.917	256.52	318.159	139.65	59.8575	326.334	162.079	184.88	327.456	392.52	517.722	252.361	299.679	285.309	301.04	241.269	246.378	564.295	163.428	208.959	433.259	208.435	388.025	732.639	792.945	524.171	580.574	601.726	382.405	392.939
504	315.524	379.988	166.966	529.345	229.459	127.078	426.274	59.7013	734.702	341.34	529.196	706.229	249.63	167.949	169.326	242.149	133.988	80.9175	445.962	81.6988	342.77	212.72	97.1975	64.5263	393.5	269.757	284.348	1089.45	854.576	1017.35	468.504	66.5613	364.457	489.596	324.616	595.596	395.066	224.398	142.903	450.454	310.554	461.603	215.74	673.638	759.415	497.725	601.405	758.612	637.45
505	322.91	391.08	205.51	156.628	188.077	163.012	238.015	259.533	218.023	322.938	738.173	490.12	277.87	222.183	195.145	75.5725	256.785	334.007	221.093	211.165	294.382	578.47	117.158	67.64	340.348	190.468	112.13	273.723	472.03	278.525	373.805	219.89	204.845	311.238	179.815	89.385	222.808	59.6975	106.225	276.132	88.6	497.34	223.88	392.478	637.673	494.835	355.413	223.803	318.522
506	511.055	767.336	915.695	952.496	283.839	404.313	627.169	1903.96	779.023	1114.96	1251.25	3353.52	180.924	366.821	793.884	120.985	611.39	276.447	388.16	437.026	920.725	1499.75	354.613	59.5438	854.263	949.893	520.413	169.91	1107	2841.65	1714.91	527.447	302.512	387.45	412.274	261.645	976.564	81.15	291.926	625.884	436.842	729.074	1129.93	1430.84	2987.23	2647.01	2058.35	1032.3	863.769
507	235.23	335.129	132.726	148.327	242.081	103.731	193.561	141.452	83.3525	449.591	813.184	235.046	205.366	148.144	224.801	136.303	81.24	70.9988	86.7788	143.929	511.39	484.84	202.505	59.4888	322.906	426.575	366.291	587.549	847.587	829.184	562.306	382.269	371.395	587.313	333.335	358.234	430.964	468.499	305.724	466.374	149.05	307.204	726.778	614.903	1201.95	970.94	833.503	520.381	248.151
508	206	255.16	140.159	164.169	186.301	83.7963	270.999	190.969	528.492	293.132	832.403	544.294	158.53	176.575	168.626	119.116	175.423	194.593	188.982	225.544	168.344	231.506	112.775	69.4412	100.893	161.715	157.38	216.581	311.725	279.545	264.059	116.195	70.9988	241.473	165.616	104.435	100.841	63.3912	121.423	288.236	59.4225	313.804	401.88	354.585	285.79	407.881	202.955	178.931	270.5
509	407.551	533.77	152.499	198.604	222.381	124.371	515.485	273.512	849.385	504.446	2017.89	778.347	279.935	162.361	247.651	120.059	129	179.726	273.416	278.165	557.071	386.945	155.167	59.3725	340.186	499.291	280.598	562.423	607.525	699.866	260.305	412.248	372.738	581.771	202.675	297.626	672.388	302.313	245.596	521.124	330.029	732.716	800.544	1112.04	607.443	1213.52	426.48	882.789	594.995
510	207.665	175.965	59.3548	93.1536	157.844	134	144.558	218.811	170.271	160.474	269.711	118.381	203.742	160.743	243.836	147.858	110.801	107.337	185.174	212.287	189.907	264.301	167.264	64.6845	137.217	94.6679	104.052	284.787	212.095	245.605	290.41	176.683	132.3	291.689	122.029	225.705	151.837	191.819	290.533	220.492	71.869	382.895	438.848	411.569	414.217	384.643	287.306	258.751	130.126
511	1050.69	982.016	314.975	549.711	233.331	200.377	59.3438	240.912	187.947	525.317	2050.46	989.614	720.767	696.616	617.737	233.113	437.366	595.011	443.459	326.231	957.677	1119.49	297.333	119.925	829.37	580.367	426.853	1027.91	1194.31	904.559	1109.46	526.739	721.178	1238.42	1019.15	355.22	425.211	256.198	550.009	748.656	451.091	1851.28	2419.39	2219.8	2548.92	2225.28	1771.7	983.98	1541.35
512	179.748	183.64	59.2362	76.9125	194.896	211.875	89.9225	147.14	268.531	262.971	446.3	253.82	210.588	124.468	165.548	85.9338	121.519	133.18	177.818	257.794	151.341	215.389	181.195	70.6975	190.146	91.0375	108.964	166.599	173.784	221.018	240.86	113.784	136.443	232.181	102.06	202.516	167.929	170.455	224.48	176.813	68.1287	390.666	388.113	336.909	358.649	523.086	455.635	304.345	107.976
513	661.331	442.426	59.2062	204.949	1146.78	203.123	687.791	278.695	2032.78	299.5	2464.74	435.978	680.166	264.762	782.871	433.108	536.494	180.935	954.411	243.357	1015.06	242.68	889.339	96.875	1097.02	567.586	284.384	1630.57	674.096	1110.39	540.658	572.403	950.726	1752.82	716.314	1925.45	855.966	1519.55	253.426	1005.51	451.66	577.256	933.26	3323.55	845.224	3262.49	3765.4	376.783	301.23
514	157.005	353.34	185.875	172.67	161.443	128.357	304.915	390.732	300.272	514.22	405.947	376.522	288.74	395.915	593.063	221.26	165.727	246.877	167.523	227.013	457.137	455.565	115.563	59.0833	597.053	95.5033	156.212	374.933	177.247	334.842	379.4	394.123	411.77	547.935	274.617	289.91	146.745	227.362	350.788	224.365	151.488	450.145	777.507	914.422	639.613	489.313	1055.72	388.665	149.6
515	177.798	220.889	131.864	172.355	165.148	181.939	188.009	221.726	973.894	264.204	988.941	453.906	219.798	184.709	458.83	300.084	210.773	59.0675	260.533	222.781	579.82	204.137	411.589	83.6762	449.288	163.105	157.69	463.806	396.815	826.509	1100.73	334.904	560.186	688.115	529.419	463.447	182.429	632.969	191.178	287.679	288.36	291.884	169.396	733.829	401.642	853.68	742.826	201.966	99.4762
516	599.667	233.523	129.005	123.744	719.377	677.106	400.999	2064.71	1712.86	1290.11	1716.09	537.932	418.015	342.782	1200.47	158.364	377.352	683.808	1626.29	836.876	343.261	359.115	1493.91	305.193	981.533	567.964	404.607	953.886	1215.6	1395.03	1097.54	1029.93	392.033	871.627	922.032	468.812	501.857	576.807	803.592	328.311	709.307	1115.53	1811.66	2145.03	1407.6	3007.77	2269.48	1661.04	273.787
517	221.879	935.684	124.524	243.923	209.003	220.839	350.438	135.114	279.353	478.059	1571.27	1145.88	290.544	179.725	209.024	109.651	140.708	377.334	153.39	270.92	183.326	450.819	59.0375	103.811	231.049	236.785	240.619	337.83	482.693	536.466	230.199	447.488	307.15	431.012	153.37	242.131	388.315	139.607	349.572	413.724	285.11	1135.08	1708.08	1414.66	1075.97	1013.93	513.525	1208.68	942.884
518	174.283	225.095	58.8013	117.208	356.991	133.255	307.663	171.741	162.672	538.276	1333.59	210.979	181.232	160.708	343.372	69.1566	236.807	184.737	121.595	304.864	461.624	400.159	117.705	136.864	272.453	308.786	330.454	617.097	1244.06	597.521	1629.26	311.567	401.621	667.163	348.578	325.42	553.047	313.349	281.23	276.116	287.636	316.476	581.208	933.609	844.009	904.958	804.632	809.241	466.78
519	373.479	1052.13	95.8487	383.08	103.328	123.268	229.285	346.149	387.759	450.639	1419.41	742.933	154.463	158.279	133.061	96.2725	147.238	317.223	176.895	199.435	219.476	582.606	69.3912	92.605	255.35	111.601	304.84	204.495	411.93	612.344	344.998	351.026	238.425	323.191	323.029	215.14	172.023	115.604	143.443	243.006	170.214	608.99	1291.36	1047.52	1019.45	1236.32	450.066	550.481	573.472
520	571.13	600.129	306.679	429	220.074	89.47	596.597	179.113	882.315	220.708	1533.18	859.82	530.209	392.529	552.65	878.85	479.568	133.933	547.528	139.334	546.259	435.595	140.676	58.3025	563.276	589.46	539.049	784.005	1638.57	1360.79	871.844	460.485	552.994	407.609	452.355	413.668	531.374	242.55	165.981	1149.13	277.475	226.816	801.476	1173.09	707.185	1517.71	747.431	306.9	334.501
521	285.335	320.154	243.568	322.461	122.589	120.07	185.015	125.079	502.916	198.571	184.13	452.879	161.6	155.101	312.11	222.001	112.804	75.4513	193.71	133.649	314.36	333.28	95.4213	58.095	291.959	170.814	159.621	455.58	546.135	385.592	468.614	75.8637	97.7875	357.489	124.811	90.63	550.943	90.65	285.103	242.616	201.871	239.041	367.837	285.041	554.76	288.51	315.381	295.65	218.019
522	292.719	331.786	313.048	293.199	152.936	83.63	152.662	106.509	245.965	188.572	195.426	328.779	196.609	150.896	233.049	93.0913	130.856	163.191	224.158	94.0575	393.35	345.135	113.055	91.2738	402.457	173.919	244.246	459.332	357.216	341.314	360.344	57.8088	105.513	551.605	121.204	122.668	107.61	78.78	269.874	316.345	392.686	307.885	302.939	304.246	597.293	309.856	510.99	416.566	269.601
523	198.944	207.313	93.6	123.223	236.363	269.835	160.3	171.552	231.188	313.937	313.573	172.554	265.483	203.194	195.452	157.823	142.177	270.533	247.785	375.19	256.062	263.433	244.8	124.919	185.202	62.8904	98.8962	275.74	178.327	174.548	141.735	137.5	103.671	268.919	106.569	130.887	171.842	114.071	281.646	142.023	91.6327	313.04	373.317	251.856	320.413	198.008	287.631	304.777	218.635
524	266.833	422.011	78.6	144.88	313.962	260.166	297.367	356.097	775.544	663.439	707.978	343.619	349.155	342.734	476.667	140.152	413.536	360.45	321.505	499.705	271.495	427.752	268.423	67.5187	487.675	126.947	201.581	318.345	308.35	540.953	600.105	432.275	297.472	375.55	242.242	443.909	201.63	207.627	282.447	246.514	123.731	395.027	829.616	1154.47	503.35	916.322	1159.39	400.653	208.88
525	613.237	674.367	454.647	424.151	439.97	399.974	852.565	470.074	1421.97	580.852	1794.02	866.621	247.729	212.989	348.387	283.332	125.056	186.369	474.368	552.691	877.048	669.495	100.319	57.585	319.983	370.721	294.436	873.602	810.926	767.52	556.097	423.219	432.769	442.385	387.821	268.054	868.059	215.43	94.1762	287.551	139.629	326.631	823.239	786.294	542.179	860.214	618.982	396.194	270.589
526	289.706	430.476	360.114	346.764	211.015	154.631	192.89	184.154	306.796	239.861	247.83	465.28	231.113	192.909	328.924	150.773	126.089	85.215	175.764	87.5263	314.315	418.179	108.749	57.485	334.361	213.99	217.09	471.969	505.391	449.411	597.934	118.35	128.805	533.336	179.789	142.748	576.624	58.4	244.384	299.804	213.419	489.026	533.699	122.745	577.205	532.951	618.717	458.246	444.414
527	473.059	424.905	132.179	183.616	161.352	98.2825	449.619	239.565	421.084	321.813	1026.86	869.212	236.015	178.753	363.918	226.355	415.87	177.609	249.969	190.878	387.163	355.223	306.446	57.4363	291.926	401.691	397.673	474.36	906.626	623.633	447.726	396.933	432.269	476.873	258.924	205.566	185.404	309.781	145.3	608.08	188.42	332.1	598.479	868.779	678.356	730.814	468.6	187.946	241.216
528	237.3	299.71	174.909	278.96	129.735	67.6075	176.625	110.713	525.48	199.713	298.493	316.311	164.425	172.248	252.195	377.978	70.6388	108.576	162.213	57.425	245.571	282.366	162.651	57.3937	216.123	225.069	180.264	467.063	415.824	225.251	374.68	69.7712	134.012	192.938	260.892	130.768	312.068	148.506	200.843	332.475	417.603	334.31	358.214	76.55	514.176	285.637	301.231	309.62	167.723
529	367.685	388.68	280.623	413.55	182.007	79.5025	471.896	176.364	392.73	215.181	837.61	580.809	180.769	125.424	217.289	139.086	355.761	138.41	214.024	154.484	456.296	313.3	151.395	57.37	387.962	321.035	328.878	587.193	899.089	1101.51	562.2	372.272	457.762	356.046	356.079	307.016	656.71	329.035	131.624	636.861	108.43	205.523	727.886	954.88	611.856	738.381	510.059	287.358	242.933
530	265.796	317.668	405.076	246.992	323.19	381.449	237.718	270.426	392.156	664.589	1330.43	453.606	247.779	117.937	293.613	187.599	76.8964	92.7798	289.133	534.535	302.09	293.524	133.626	116.86	187.424	160.383	227.094	289.437	790.365	399.202	468.551	242.718	298.002	410.774	112.915	161.975	869.979	107.923	113.587	194.344	62.4131	151.55	414.536	308.029	346.423	299.956	530.25	294.302	274.187
531	209.006	314.599	179.105	338.813	134.244	92.7325	142.689	169.973	389.702	187.804	194.333	362.574	197.359	135.679	241.61	167.609	67.2725	77.6325	150.439	59.1737	336.291	280.379	73.15	62.035	285.485	188.78	162.48	472.321	421.939	391.087	436.332	56.7638	90.8925	385.103	157.438	144.089	329.69	117.476	266.79	223.129	233.923	278.194	366.846	228.259	560.301	236.166	362.342	330.614	196.641
532	168.314	591.413	56.7075	150.499	291.702	211.97	227.965	126.366	172.225	790.599	1134.62	473.882	376.484	289.469	177.07	375.147	96.4038	247.641	171.049	464.326	388.67	572.906	269.533	183.365	498.08	375.691	462.976	599.418	1152.96	1096.66	462.262	361.704	386.746	427.053	323.491	247.635	481.609	454.6	528.985	364.251	99.4988	534.784	1167.38	663.658	1619.24	925.375	1550.65	1060.57	469.471
533	139.498	231.149	85.7175	81.1388	155.174	102.964	168.244	103.147	109.478	292.791	596.684	214.324	236.414	210.061	121.905	154.556	88.9663	58.085	71.8925	178.468	279.988	152.526	175.662	56.6875	286.081	176.126	200.809	311.119	736.531	457.506	427.533	176.365	298.663	299.709	194.39	189.86	266.219	344.957	218.346	271.038	147.556	128.836	519.405	331.769	727.359	434.87	572.415	351.424	271.015
534	185.269	296.956	67.2512	88.5125	335.099	115.925	237.107	134.868	101.475	503.808	1086.71	360.005	250.531	98.9262	250.86	57.9588	79.2687	56.5513	100.439	194.596	275.536	346.18	170.667	62.5775	295.096	435.695	427.945	445.236	757.026	495.459	388.342	501.884	366.119	671.712	227.059	192.598	673.951	214.876	289.871	176.504	225.244	516.559	191.461	444.832	717.836	395.155	346.501	327.125	223.665
535	198.996	496.785	56.3612	202.849	406.543	255.063	256.875	340.186	527.81	554.245	1873.09	567.789	400.553	419.929	461.229	242.755	325.441	293.774	517.984	532.391	254.08	314.962	616.401	132.751	498.375	341.83	276.531	576.66	634.631	642.622	826.014	638.337	772.564	1157.53	512.945	742.048	682.579	686.614	474.673	592.543	519.327	930.643	1445.92	2939.61	949.008	2071.19	1230.34	742.954	396.589
536	390.95	321.564	272.887	620.59	217.857	156.97	391.408	600.355	893.245	519.175	121.865	671.014	197.65	183.105	506.266	181.963	153.219	238.384	420.058	108.331	592.401	491.061	207.015	56.3475	526.852	590.041	316.644	878.622	1464.44	562.55	1037.28	116.679	200.183	507.848	592.826	184.356	531.276	237.924	390.29	270.64	644.33	444.371	716.806	225.882	1031.82	552.174	507.465	805.794	229.357
537	588.858	988.062	620.192	935.351	364.673	270.257	461.899	556.958	617.756	603.393	405.718	613.125	420.61	368.665	674.89	449.213	161.714	117.705	410.421	257.639	661.348	931.201	182.685	56.2345	515.987	345.065	433.568	870.95	906.667	712.149	1086.61	125.285	240.752	676.754	135.389	262.404	860.425	184.824	621.769	738.102	585.512	917.352	849.883	530.187	1282.7	521.82	896.646	627.664	447.67
538	189.06	195.149	56.2338	99.4963	390.65	275.38	164.928	243.735	726.379	358.288	1290.5	371.151	274.069	155.586	382.984	130.336	145.706	109.455	225.869	272.319	243.548	221.405	417.23	76.3662	703.281	261.022	167.789	530.138	408.909	514.987	487.674	264.913	555.809	852.461	448.868	652.577	283.077	573.217	248.232	460.741	285.795	505.77	674.59	1019.77	559.4	1201.92	1325.08	375.476	215.521
539	237.348	402.493	210.07	178.693	210.786	162.271	260.281	186.291	1178.11	363.966	280.478	228.033	154.495	132.145	260.31	211.194	80.3287	91.1125	238.104	184.446	559.304	307.106	337.043	56.1437	373.739	500.902	284.371	439.309	877.199	1136.97	577.469	93.04	87.2125	528.88	383.373	355.522	684.589	171.105	188.576	216.947	482.38	189.509	416.994	692.614	573.841	756.571	1574.5	544.576	155.224
540	583.189	856.832	71.0225	459.236	98.3337	65.6137	154.264	156.368	1139.69	290.394	229.445	621.66	294.371	372.845	275.827	531.355	81.4175	172.786	340.334	105.734	936.396	504.113	64.625	56.1225	436.83	362.774	314.58	638.764	739.884	530.215	308.652	105.285	211.281	380.911	554.798	171.873	324.08	374.39	284.705	783.324	286.726	468.315	598.67	509.465	1268.57	607.778	861.421	680.237	350.012
541	162.996	241.665	177.581	127.23	199.429	206.694	162.465	270.259	108.651	580.029	919.889	357.173	170.028	131.416	210.831	87.3337	56.0525	57.95	95.5825	366.75	294.48	278.536	97.4838	62.2413	338.864	193.169	271.033	420.699	911.726	570.02	544.219	360.298	305.761	420.152	170.693	175.65	824.73	201.15	261.809	199.551	69.6025	242.128	481.741	325.144	798.344	533.221	591.506	649.715	254.863
542	239.143	294.294	198.846	142.154	295.087	170.512	213.834	234.325	253.394	465.836	683.181	201.025	288.529	155.291	346.446	129.36	57.585	56.0337	121.311	288.026	331.494	476.8	138.662	73.8187	219.958	225.947	228.784	480.326	557.898	461.1	466.381	191.771	200.074	399.25	132.284	107.029	622.194	139.59	201.391	165.973	83.225	283.929	259.525	213.819	456.267	372.038	549.831	495.605	360.58
543	257.85	397.47	56	194.548	443.32	348.916	417.827	335.786	1124.28	682.259	968.543	440.259	332.318	205.42	523.766	380.136	97.4839	155.266	376.752	559.577	272.293	295.555	146.918	104.955	548.325	271.239	265.452	654.911	637.673	593.741	360.7	292.602	506.459	1186.61	206.671	628.861	935.514	556.68	342.807	278.759	191.491	809.711	745.636	1026.01	660.688	1054.79	1430.39	705.161	322.298
544	99.545	167.274	61.1725	66.3512	199.846	71.1412	115.149	119.935	68.7875	367.947	837.02	158.118	197.536	86.1563	165.197	100.88	68.0075	63.2537	103.662	125.745	136.965	239.589	258.226	55.8925	203.446	361.866	269.37	484.096	820	514.915	383.03	344.831	156.896	285.901	139.348	195.14	441.623	149.685	188.294	278.941	111.132	146.891	664.645	585.449	735.744	559.785	1299.35	518.569	197.076
545	155.734	521.087	70.695	115.805	149.063	117.649	169.176	127.81	161.311	533.641	486.976	289.926	191.63	128.499	102.709	204.923	85.715	112.301	58.0412	197.814	432.572	494.098	127.755	82.6525	286.704	253.45	252.412	270.947	778.977	894.746	337.647	256.973	212.678	338.925	169.53	274.015	505.681	275.485	345.202	199.604	55.8275	291.28	825.231	413.605	1151.99	385.559	922.048	1003.05	339.824
546	125.314	188.982	416.13	281.241	300.344	220.738	175.021	128.916	55.8137	689.446	782.706	609.734	252.202	361.041	270.959	212.339	135.541	106.819	67.6663	250.045	217.493	604.253	262.716	82.0187	523.354	182.364	213.379	191.41	184.05	211.845	230.035	144.199	177.659	380.348	163.748	126.266	221.39	101.905	359.313	137.6	106.397	346.14	177.411	56.9537	745.849	227.404	348.217	391.436	183.695
547	258.606	204.453	224.641	200.3	281.009	234.262	158.084	207.384	163.063	202.034	562.703	248.775	259.584	234.941	413.462	223.656	186.588	189.319	224.063	278.444	265.887	188.338	91.9531	59.45	421.394	93.5469	103.213	251.609	328.075	302.569	379.559	172.934	134.066	311.012	121.628	55.6906	312.059	56.8406	489.191	339.325	194.844	545.734	781.303	643.706	860.675	777.975	512.322	523.269	340.041
548	202.205	379.584	256.891	202.713	206.34	183.368	178.184	322.416	68.5725	566.148	695.08	327.887	249.841	245.979	336.748	101.976	56.5763	55.6775	64.3	360.685	316.996	723.511	120.219	59.2875	291.762	163.981	198.299	326.525	489.496	364.501	507.536	170.03	208.124	316.93	176.412	151.84	357.98	179.769	294.473	96.945	115.179	406.046	539.301	466.651	944.856	399.816	606.771	665.209	493.561
549	536.82	696.628	319.561	619.658	279.419	115.661	463.751	196.028	1864.76	318.7	595.362	794.104	417.984	323.16	548.53	924.994	243.815	55.6138	448.098	117.1	807.725	500.38	207.276	64.9513	617.195	597.418	445.738	1191.67	1705.1	950.631	1084.69	159.451	256.856	761.378	705.425	320.483	804.509	255.077	277.989	960.474	745.069	338.791	643.819	532.345	832.441	727.891	924.74	435.825	265.864
550	113.723	181.67	64.1226	107.238	211.735	132.206	288.029	146.643	435.996	221.883	905.912	303.051	179.838	87.2702	209.279	74.1048	55.594	82.1107	249.532	92.7845	133.088	112.508	332.689	64.0821	474.165	281.982	222.321	597.124	286.257	534.745	376.22	383.965	493.67	619.714	199.479	748.148	260.617	457.81	223.688	398.629	297.339	548.483	446.135	1080.77	494.017	1069.07	1009.93	371.846	233.251
551	171.102	142.249	93.1774	104.363	159.393	140.411	127.2	162.123	196.72	193.431	369.086	166.144	180.973	127.051	229.837	129.623	166.01	149.457	156.649	183.399	144.033	213.449	181.436	55.5702	244.198	109.796	109.982	226.868	279.389	224.59	248.09	182.976	150.042	302.92	115.661	230.846	180.41	191.914	213.549	163.629	90.1202	316.054	393.425	326.45	385.058	406.127	351.874	231.602	140.277
552	402.419	560.624	264.118	426.414	384.25	141.55	301.649	465.105	421.321	597.318	377.286	943.05	235.116	202.681	515.93	319.949	191.007	98.2225	785.092	109.933	441.306	508.056	306.017	55.5438	403.988	496.641	318.495	1258.18	1040.47	420.05	1189.68	234.458	93.6375	486.73	707.369	232.852	613.686	268.517	264.98	434.538	513.197	336.337	409.799	286.245	796.086	420.549	384.75	688.594	216.363
553	364.259	410.761	268.668	398.163	208.686	169.903	255.504	153.579	743.164	292.85	307.601	545.991	263.517	224.648	312.805	219.759	103.356	98.6762	235.975	154.635	304.072	402.979	81.6225	55.535	347.226	202.795	187.219	470.946	641.644	350.391	521.837	71.635	123.971	316.514	214.79	106.97	799.694	154.632	261.225	194.456	191.5	231.18	340.739	220.535	354.574	227.439	236.929	258.418	133.607
554	296.869	424.789	164.213	318.771	122.531	133.077	214.063	164.824	390.4	280.699	214.696	367.983	134.66	179.503	309.3	212.939	88.6875	118.861	160.708	110.115	302.985	442.461	465.832	476.239	331.215	107.97	128.236	325.999	353.954	284.566	301.124	55.4838	71.385	235.591	183.602	70.0463	253.134	102.524	348.49	243.893	200.571	265.086	342.085	89.47	568.311	243.253	336.874	202.95	200.009
555	1300.21	3672.22	655.997	730.883	891.869	766.599	523.945	597.836	1455.92	1326.69	1012.2	4592.85	814.061	798.709	1263.58	718.106	313.834	101.949	665.039	534.746	1309.04	2154.47	253.835	55.1163	1332.66	1129.44	943.556	2226.65	3079.09	1305.9	4521.6	727.599	441.629	2049.03	1800.12	905.678	1996.77	784.364	3080.09	1964.44	2586.72	1718.93	4738.25	2019.82	4316	1830.51	2451.94	2985.27	1848.91
556	129.408	202.915	81.3393	85.0405	255.561	104.892	189.92	155.45	104.518	442.617	735.804	238.66	242.132	136.337	265.455	197.277	64.2583	80.9119	110.68	208.786	158.869	267.823	219.827	73.2869	262.101	320.419	320.167	386.329	565.315	823.426	289.914	185.832	135.821	324.764	114.563	140.127	174.875	185.21	289.474	205.81	71.6917	236.348	291.417	638.864	794.593	553.4	390.865	527.175	193.864
557	219.202	300.781	133.596	183.751	151.352	151.045	225.795	270.945	277.236	337.01	558.418	427.012	213.136	213.455	188.635	54.975	200.356	276.09	223.926	273.94	246.845	325.494	95.5	83.035	254.11	131.773	123.201	209.919	408.846	395.045	375.613	157.331	171.439	243.559	185.849	79.4	388.334	84.9163	101.014	197.034	82.5175	349.721	417.92	317.839	388.174	389.163	246.536	191.313	285.589
558	178.149	244.207	193.461	135.238	186.175	150.46	183.513	217.962	100.705	461.885	583.492	252.518	251.817	155.848	260.925	80.8738	76.6821	105.751	79.3524	192.355	269.025	426.938	99.5095	72.344	209.646	183.129	210.717	358.758	457.811	430.648	337.014	118.105	159.068	305.49	112.185	104.764	450.063	106.858	159.781	54.7798	63.8821	281.549	163.912	319.986	550.451	145.39	285.601	312.34	135.537
559	100.834	81.9625	825.93	113.304	137.084	203.37	77.9325	1046.44	188.498	159.905	300.87	1272.39	113.799	562.22	185.36	216.011	79.8287	193.792	97.1088	158.429	79.61	267.396	164.037	128.382	280.699	74.8988	81.1663	144.814	69.5563	164.028	2476.76	140.479	108.363	206.559	70.9038	167.321	162.933	121.781	432.44	120.601	82.2175	293.079	298.783	448.009	2331.21	340.599	355.908	214.893	128.144
560	187.22	570.721	403.163	590.58	200.596	157.05	149.034	111.416	604.087	327.966	161.735	1136.92	308.395	276.965	283.498	345.803	55.5325	86.5625	116.075	131.595	81.4825	711.966	78.8475	64.3975	174.993	160.456	292.48	336.178	750.577	329.449	1268.16	186.475	153.176	425.46	372.709	128.206	415.14	85.2013	137.852	244.421	402.539	176.749	915.753	296.308	1025.39	375.086	412.478	888.431	191.56
561	54.6463	272.725	168.238	319.92	336.21	545.701	202.191	712.13	272.33	808.44	586.06	555.008	248.546	270.658	434.033	229.798	210.876	544.43	356.625	625.811	139.345	323.8	160.824	173.441	670.996	98.495	221.251	414.516	236.014	442.988	868.335	325.094	599.595	431.986	310.9	310.794	370.863	419.116	596.606	327.411	234.909	1079.91	1895.14	1150.13	1564.24	1147.23	1118.34	1192.78	451.156
562	250.794	358.63	54.5712	176.124	314.658	324.348	284.579	477.918	1834.92	516.965	663.092	481.478	402.46	298.791	461.05	468.361	88.635	229.854	245.878	473.277	354.64	281.788	1038.89	84.6713	866.744	246.243	258.131	429.924	366.66	646.168	360.441	299.329	643.05	443.644	336.783	396.88	299.421	718.964	365.681	434.55	213.524	848.433	616.013	840.072	807.232	818.117	2025.76	473.788	286.46
563	715.945	656.378	717.712	718.461	468.89	499.965	1740.15	829.75	2151.43	969.58	1860.84	946.462	427.414	281.99	466.306	248.879	216.363	159.49	694.429	945.253	1225.81	874.482	112.918	54.5275	627.89	653.587	536.055	1225.98	2013.6	1864.98	1048.41	820.651	850.014	744.258	557.56	390.563	2227.28	394.406	149.575	389.29	150.338	444.446	1080.96	1187.08	974.81	1020.78	686.42	534.3	426.794
564	314.017	370.807	258.349	415.548	110.8	117.527	487.633	295.226	182.375	342.506	244.12	455.702	190.577	283.171	322.602	188.532	96.2321	155.135	145.411	102.61	347.814	569.802	125.66	95.1333	308.674	81.5988	90.5988	371.431	302.082	253.896	295.477	57.6321	56.719	261.336	143.694	54.4595	389.001	74.6143	189.977	155.842	133.479	274.19	346.41	106.108	558.05	217.623	314.769	234.318	194.026
565	85.4275	104.26	172.971	105.753	134.55	147.491	209.083	245.805	280.77	398.319	871.474	328.983	121.911	172.329	318.355	241.741	57.8025	101.918	159.031	247.72	247.47	215.943	147.526	54.355	509.626	119.861	115.384	186.37	82.8637	458.757	698.815	311.4	267.746	262.429	334.005	534.12	159.84	125.316	204.179	202.148	164.118	233.47	411.193	508.973	226.292	555.284	883.784	138.261	155.846
566	155.451	505.006	54.3475	182.171	420.799	238.434	400.541	341.559	236.681	1864.03	1500.33	490.089	215.794	229.287	322.074	323.181	127.146	342.999	200.257	387.512	384.911	538.646	533.903	383.341	388.11	195.539	493.55	472.781	853.041	693.07	759.651	459.755	696.977	355.142	293.314	191.026	726.839	238.994	636.154	73.47	188.099	629.439	490.673	814.945	1733.39	371.036	861.875	1694.67	594.464
567	520.084	712.696	117.606	169.555	528.619	254.943	450.059	216.399	432.793	646.202	1715.77	627.169	440.959	231.226	642.045	138.36	161.646	74.6737	316.29	292.13	991.476	833.269	219.333	54.34	659.582	779.384	548.664	1103.81	1347.97	1238.29	898.258	571.842	525.27	878.88	464.605	402.241	285.029	482.769	687.54	358.421	295.926	650.153	552.558	782.116	1648.39	1573.57	693.976	1026.15	614.614
568	402.533	822.925	54.3308	277.617	527.342	329.213	397.721	384.25	248.587	1609.27	1270.98	545.658	409.583	449.24	734.852	279.375	175.098	399.231	186.546	579.533	803.573	1187.67	171.51	260.485	716.317	469.454	603.01	777.39	1423.07	742.933	1511.53	659.975	696.262	730.235	366.692	330.085	594.417	429.138	805.631	535.056	321.887	743.602	1295.01	961.717	2124.64	1404.27	1279.72	1143.99	877.054
569	190.01	160.196	54.1288	79.1462	179.258	166.921	79.7385	177.023	282.356	272.096	350.312	226.821	195.667	158.367	230.775	102.879	129.804	125.058	129.737	256.827	157.408	217.919	213.848	76.5558	261.915	100.898	106.256	143.76	243.898	277.488	257.363	178.912	168.11	238.471	136.433	195.75	203.475	177.365	274.827	166.079	89.1481	394.258	454.462	416.523	543.425	627.277	479.221	281.073	176.294
570	249.572	314.515	161.175	157.694	174.683	73.9613	347.941	178.456	374.155	150.101	1290.41	593.541	190.881	88.3075	162.881	76.665	128.861	172.289	173.585	75.3187	389.301	248.485	110.451	80.2575	206.88	420.488	266.986	507.467	697.342	821.061	440.57	322.675	371.753	413.286	329.017	408.748	442.846	170.348	54.1187	341	153.826	409.596	787.011	1591.49	598.4	1187.14	539.625	396.939	375.5
571	262.796	200.019	116.808	130.776	296.569	160.115	266.313	178.379	545.628	221.673	903.535	239.849	237.958	173.769	490.941	257.166	142.771	104.509	292.181	180.766	156.725	184.653	197.721	54.035	792.27	303.69	164.4	656.946	395.327	661.175	469.426	307.549	500.914	473.142	227.584	487.375	371.344	322.239	152.521	562.941	212.164	246.78	443.123	1181.52	403.176	960.58	1153.25	199.443	123.543
572	162.555	171.947	109.844	124.805	172.355	113.524	122.381	202.209	174.653	222.921	333.313	165.631	208.88	166.555	271.436	149.564	91.7237	189.393	126.885	200.496	151.795	253.766	154.054	53.905	296.5	89.1863	109.025	272.329	226.001	203.825	276.385	170.259	153.537	314.916	117.129	173.491	153.623	186.268	281.925	155.026	81.8713	317.189	590.281	493.545	513.38	510.556	591.681	305.351	163.361
573	372.749	530.004	271.262	433.326	229.829	172.264	275.039	227.551	488.626	291.408	245.236	444.678	234.884	209.05	378.714	194.971	123.604	112.244	224.095	181.344	446.255	530.194	132.555	53.9	337.085	198.814	239.969	512.861	518.144	458.973	489.905	64.5625	153.028	465.624	155.185	137.809	675.279	98.925	223.014	382.699	320.068	361.705	700.571	244.795	716.27	271.819	429.649	466.962	200.409
574	209.917	250.436	214.874	148.205	179.42	146.186	219.719	237.229	149.07	459.539	788.991	252.414	214.24	141.714	279.226	97.3988	65.5763	70.48	87.0463	199.208	333.459	527.395	131.766	53.7788	255.241	213.89	238.31	369.689	549.972	442.569	445.804	158.814	200.745	295.134	167.998	146.253	495.856	161.571	211.631	86.5362	108.835	325.279	271.32	353.281	635.433	236.458	441	450.921	304.875
575	200.058	186.715	88.3263	128.405	243.873	165.836	157.061	215.065	373.197	325.801	649.024	290.011	243.909	144.804	326.786	172.762	166.87	157.111	324.221	211.449	270.414	277.181	243.289	53.7563	352.786	160.833	139.938	344.696	358.311	253.099	374.245	352.688	256.01	340.256	175.485	330.228	259.246	485.704	246.716	221.879	132.99	465.785	630.003	615.341	481.257	683.215	991.678	370.943	153.295
576	438.246	589.724	172.808	150.699	376.791	135.732	344.901	205.911	377.601	781.403	1652.88	395.636	545.597	257.975	341.424	145.601	160.379	71.0463	171.744	276.339	515.058	610.014	164.577	53.6925	379.35	586.766	552.786	973.268	1988.17	1450.65	1007.67	702.975	472.775	953.896	370.914	653.661	1473.9	567.444	397.818	754.285	345.954	393.207	1302.31	2374.09	1358	1552.81	1915.11	1184.48	798.739
577	174.958	276.094	198.021	194.152	240.169	214.202	312.821	345.46	693.602	459.051	580.156	379.426	297.144	188.18	461.642	204.968	110.135	75.7929	247.919	309.53	272.127	293.29	427.18	53.6476	322.417	126.83	128.021	494.325	448.035	588.1	1174.62	691.332	301.787	624.251	303.218	352.324	284.013	190.394	375.35	309.427	313.34	417.313	1198.71	865.938	714.035	776.855	1115.8	601.355	317.308
578	213.914	221.534	110.219	115.045	157.27	68.5325	175.704	157.801	144.13	482.394	408.616	147.654	301.741	264.766	295.178	53.6125	65.6575	72.015	112.056	155.063	349.611	688.434	77.5812	54.7287	251.158	157.468	453.785	368.849	764.403	889.981	530.679	402.341	165.174	358.374	284.314	158.806	343.965	238.435	322.181	297.056	81.405	232.113	202.955	204.675	816.695	440.355	720.655	365.772	333.995
579	399.054	493.769	322.843	410.124	238.504	117.838	431.531	410.695	613.068	248.037	448.067	757.398	317.204	289.47	520.08	757.296	78.4048	132.79	308.707	113.235	759.6	491.695	193.463	53.5857	528.739	370.607	436.626	778.152	738.045	1091.98	578.24	130.199	208.567	1009.65	387.957	193.314	916.168	325.435	138.463	268.405	502.982	137.426	343.737	203.038	706.84	417.971	1551.26	484.463	71.3881
580	294.898	217.07	110.152	106.149	347.443	236.831	111.921	152.719	365.318	277.74	417.257	228.482	258.761	153.086	301.758	159.951	89.3298	104.16	232.751	286.552	206.458	275.437	207.639	100.488	197.451	104.431	115.549	219.618	246.587	274.639	192.468	134.274	97.3845	295.462	105.22	183.62	272.354	172.711	225.39	160.173	60.656	275.473	157.163	291.799	392.255	320.254	367.648	227.026	145.676
581	561.101	619.546	536.221	579.803	409.276	137.401	346.505	174.105	2044.39	411.321	657.679	577.33	354.311	216.449	948.021	291.22	309.304	118.136	428.401	108.463	1437.32	559.003	943.684	53.5262	1124.48	991.321	506.835	1234.05	1471.98	840.469	2428.34	490.368	372.34	913.86	1157.62	348.026	980.895	407.663	259.897	562.636	1040.44	544.143	873.174	1089.27	1103.4	2031	2259.26	514.135	458.969
582	354.543	369.633	222.52	242.307	181.467	163.898	190.611	222.281	281.912	285.969	609.006	391.995	267.951	262.368	297.592	117.368	220.332	206.481	206.998	269.101	320.479	478.824	104.705	53.4833	314.188	177.09	145.902	342.942	519.885	398.742	354.945	214.161	188.267	326.814	213.523	81.5607	321.555	80.3857	161.205	324.68	108.256	545.796	653.977	519.092	764.281	583.924	382.406	291.667	373.243
583	314.906	284.736	202.26	178.925	314.043	553.396	289.821	305.899	1031.36	508.999	863.265	475.363	396.128	209.072	363.571	126.343	113.195	113.696	402.248	690.774	249.598	376.991	149.706	83.5575	277.382	139.626	139.417	216.239	370.059	508.613	382.196	247.083	235.381	336.005	154.151	276.12	563.104	227.518	146.843	118.903	95.8762	257.569	285.674	291.109	206.41	326.375	462.939	268.925	107.08
584	216.566	179.739	253.411	152.357	209.409	214.355	219.568	233	443.286	381.345	583.855	275.509	290.331	180.311	236.363	118.546	170.701	153.099	215.616	243.849	158.261	284.009	349.73	53.4237	451.476	104.728	215.176	340.392	330.509	767.393	350.981	197.914	260.837	389.82	193.878	342.659	349.851	260.447	216.628	223.511	80.9575	367.244	422.87	628.496	471.821	690.496	736.349	253.093	161.923
585	250.392	535.318	402.797	529.518	171.231	161.029	279.417	230.131	412.835	322.429	207.04	841.864	237.621	207.621	302.918	287.692	57.2583	72.5306	185.226	146.924	249.156	285.426	93.5597	53.4042	347.529	226.764	255.838	638.103	745.107	465.022	630.411	121.875	170.815	675.668	186.664	123.41	691.608	126.438	564.589	330.057	502.512	890.449	867.319	385.81	1039.91	474.343	680.149	934.462	750.769
586	622.135	448.629	53.0325	249.385	343.745	392.785	275.201	1251.24	1356.22	538.364	769.246	484.555	384.85	458.618	491.296	885.484	281.075	646.881	548.116	651.82	567.628	438.738	944.732	219.874	747.327	266.341	174.787	1142.65	542.146	841.589	421.176	211.414	495.324	956.916	611.161	952.14	327.704	1016.76	404.261	525.065	298.568	848.324	1206.74	1917.04	1132.24	2059.02	2173.64	699.697	224.971
587	235.404	331.144	292.658	385.491	227.02	164.473	279.132	187.349	727.545	444.031	219.594	813.65	161.111	124.469	266.188	223.524	99.74	105.486	296.848	180.493	279.814	279.348	113.809	83.9788	222.007	156.214	126.866	220.239	444.345	250.759	315.889	58.135	73.0187	198.621	117.964	58.18	521.046	82.1338	111.979	116.064	94.2725	137.343	182.98	52.8525	332.414	146.019	152.398	194.691	76.54
588	157.14	158.093	125.495	102.458	158.202	139.928	119.348	92.0075	213.107	204.798	282.092	159.895	252.408	130.675	243.458	85.6238	99.415	81.5987	112.246	145.645	178.6	214.662	156.963	52.7175	278.55	115.873	101.513	277.07	148.003	219.304	261.99	198.129	142.484	287.026	113.6	181.653	184.844	188.083	269.019	196.481	116.71	390.874	421.724	388.839	490.484	519.549	480.93	295.06	227.378
589	327.721	825.082	120.3	249.6	168.338	133.986	456.055	194.887	140.656	403.835	857.775	730.359	149.42	65.7687	231.251	140.833	173.475	259.976	241.113	170.436	905.429	529.472	52.545	82.8137	623.145	143.585	454.725	305.351	428.866	802.523	199.526	315.435	578.625	390.072	183.128	389.169	493.916	218.949	266.494	413.815	201.634	686.641	951.706	2065.9	932.411	1197.36	481.291	520.5	637.148
590	670.27	451.712	322.423	394.574	523.938	548.031	779.594	766.85	1342.02	652.819	1863.45	659.69	637.72	538.28	980.226	317.494	634.879	210.354	1119.4	684.678	1664.28	522.554	490.695	70.345	787.039	268.652	456.336	1146.7	877.486	1061.3	1389.78	316.645	410.762	1157.34	551.229	711.803	734.24	845.737	172.015	281.947	98.16	142.155	283.701	1032.79	296.195	1180.65	1368.21	261.226	81.1325
591	319.522	401.425	193.932	219.193	76.365	52.4267	159.02	245	208.612	276.955	416	405.912	263.747	184.628	301.237	77.6617	139.972	151.257	155.27	175.178	266.183	469.338	89.4517	63.9167	199.627	178.56	150.432	273.34	433.668	318.34	369.832	174.39	127.537	224.583	225.035	99.4633	220.182	86.8767	128.022	307.122	67.2667	497.833	684.048	533.002	673.522	552.622	342.997	302.195	315.962
592	173.143	258.006	170.299	133.809	241.309	142.455	216.31	212.316	100.958	466.491	727.274	260.391	208.449	169.425	251.179	102.984	92.5525	67.0288	92.8337	229.724	302.257	561.986	135.374	52.1225	233.572	230.343	252.979	395.789	636.533	429.238	543.349	201.204	220.52	420.649	199.034	180.881	502.589	202.129	189.227	259.071	102.541	258.767	520.577	409.749	649.551	613.301	526.487	421.265	369.596
593	480.011	730.072	209.873	369.425	230.227	178.542	539.568	477.229	647.001	508.729	1570.36	771.281	310.686	271.755	343.411	52.115	91.7225	192.007	466.038	388.21	492.57	504.957	61.9787	100.475	412.498	334.291	466.54	596.794	1209.91	827.451	750.374	589.165	687.732	1129.9	637.964	315.326	571.394	167.029	209.824	305.779	227.951	822.654	1285.94	1456.92	1418.06	1126.68	832.523	728.294	604.992
594	429.081	458.064	357.738	431.756	235.104	204.944	409.615	245.13	906.128	435.859	314.896	581.764	215.106	184.576	331.97	259.978	104.201	79.4862	317.645	189.446	423.531	429.712	58.69	51.9412	467.488	298.969	262.478	518.372	1150.5	630.096	804.546	161.736	161.903	499.9	267.806	139.004	1295.99	214.105	267.848	247.975	233.601	266.818	514.058	449.629	730.821	439.584	447.36	480.327	225.225
595	147.173	318.344	113.745	175.681	341.757	290.511	316.646	312.128	378.991	492.001	999.415	589.791	206.92	117.513	437.624	114.427	71.665	79.3875	213.16	285.516	103.013	157.197	242.609	51.9138	489.659	194.581	194.57	592.394	363.539	438.289	521.254	245.89	486.616	867.925	143.524	645.259	459.368	767.717	254.805	491.075	217.778	666.839	818.366	1384.49	457.389	1466.05	1026.78	524.894	243.211
596	256.404	237.064	85.3563	134.709	292.068	245.984	279.08	338.685	821.939	497.358	631.169	623.6	205.141	234.774	674.466	287.269	203.841	147.683	473.825	346.886	505.844	279.74	324.414	60.2025	606.264	144.804	131.669	427.605	439.495	517.423	1006.13	400.004	529.645	761.564	362.496	481.999	296.973	485.649	195.396	176.981	169.882	373.535	994.76	656.298	696.678	506.324	1062.05	367.036	180.129
597	217.059	400.385	588.936	403.736	438.706	215.56	477.123	534.819	51.875	719.449	785.694	248.518	748.426	601.726	453.276	209.697	190.435	216.146	213.732	396.384	376.884	527.475	182.965	210.824	559.701	317.408	410.033	693.241	1074.6	561.43	906.689	470.666	553.783	859.568	347.871	438.978	749.33	406.137	231.471	631.526	440.913	304.994	836.227	951.587	751.444	925.918	786.219	672.949	493.994
598	354.235	269.514	253.81	209.33	132.232	109.37	315.674	232.917	330.892	234.787	665.241	413.517	251.548	187.134	189.534	89.8988	190.285	140.474	177.644	206.693	317.914	420.621	123.498	51.8263	212.202	199.701	167.889	317.994	523.666	450.702	386.699	228.986	213.465	324.226	211.723	120.566	394.711	101.744	115.806	258.691	76.31	408.266	539.405	502.332	518.476	544.175	306.44	255.507	261.642
599	682.03	1024.11	224.018	1196.38	466.673	159.195	935.209	266.016	844.247	603.408	504.066	778.689	812.183	660.615	1185.07	1264.29	262.065	242.066	927.999	133.202	1363.23	771.206	388.905	126.909	977.101	454.414	546.949	1293.88	2113.25	1180.44	1147.99	207.836	585.335	983.034	990.036	525.063	1409.03	475.08	600.829	604.084	884.13	651.952	722.433	1173.11	1489.46	863.673	1211.37	965.921	435.254
600	143.519	112.438	360.943	254.373	261.421	235.408	271.272	380.165	231.488	182.231	733.73	485.762	180.619	157.08	605.609	225.15	211.769	104.128	220.905	231.909	184.705	179.609	943.222	51.6987	293.335	224.654	161.675	534.643	447.793	736.421	1310.24	374.017	171.106	639.039	269.621	577.634	273.475	380.416	202.915	251.05	344.387	252.004	613.241	592.704	728.737	1627.93	1636.03	422.217	244.431
601	557.999	677.774	260.966	363.228	181.32	89.555	293.272	245.129	602.394	228.919	335.28	359.491	317.671	243.394	392.419	175.645	95.975	87.7738	167.725	88.2113	555.954	456.624	263.236	51.6863	755.876	949.852	460.291	1168.06	1465.14	832.211	1087.53	214.075	239.129	929.231	749.081	396.354	973.425	502.517	99.8238	330.111	581.951	305.42	875.304	1199.85	1280.66	1311.32	1281.67	805.381	120.403
602	374.814	542.938	269.614	395.46	284.311	153.729	300.811	156.229	455.392	315.085	359.814	596.829	436.318	258.772	464.685	176.131	123.951	111.511	203.981	129.43	435.676	485.504	125.341	51.6088	573.179	491.714	355.961	854.684	916.717	477.031	1064.85	201.071	208.153	653.544	292.89	256.863	1063.58	239.741	390.651	482.919	564.966	502.136	558.951	629.646	868.456	633.928	732.459	579.569	332.467
603	178.129	281.696	105.036	129.604	209.463	132.74	171.044	141.316	135.368	379.241	871.705	281.58	241.219	109.912	244.671	59.5812	61.0388	55.1075	116.65	187.906	257.845	400.344	110.275	51.5475	176.378	291.53	188.169	331.967	588.014	476.085	403.59	215.779	242.298	390.875	142.679	155.861	466.693	161.494	241.37	313.043	99.5487	334.04	509.481	500.201	758.475	596.447	560.239	601.525	332.827
604	356.181	405.895	303.573	422.158	215.696	184.51	310.905	221.457	467.112	339.736	295.558	432.385	151.49	159.53	354.399	166.583	94.344	72.831	238.02	178.552	304.549	431.887	82.1762	51.5452	385.238	228.615	173.524	521.699	710.055	422.13	624.742	100.83	101.462	394.875	229.945	104.056	753.685	129.564	328.286	336.302	230.951	436.915	504.507	194.446	790.604	377.25	381.714	461.182	263.552
605	306	431.714	278.529	313.551	134.335	70.5425	164.137	145.686	379.516	255.18	235.346	459.469	202.914	259.631	339.108	163.243	56.9813	85.8413	145.977	69.8925	566.419	479.155	114.003	51.4	246.354	250.577	236.438	520.604	446.524	383.262	658.78	86.2113	130.109	437.783	315.664	172.218	320.904	178.669	464.691	326.361	462.207	343.964	382.174	272.663	753.778	255.482	628.334	455.438	308.649
606	294.704	253.928	196.964	262.146	367.149	534.372	343.848	491.156	1328.08	729.141	869.2	643.068	274.501	330.771	638.518	227.144	266.675	273.445	418.089	615.674	235.25	374.521	357.286	105.851	584.275	230.174	227.871	608.754	668.533	633.591	841.055	355.18	462.331	730.399	364.971	522.139	729.408	478.614	241.912	229.841	152.99	525.926	337.349	457.125	828.629	427.546	687.592	249.731	146.253
607	185.78	150.373	51.3125	102.168	173.193	135.845	80.53	186.783	267.108	294.525	378.895	246.82	233.41	156.03	209.915	95.0925	131.373	160.81	136.637	249.083	200.808	231.235	186.125	80.4825	247.702	110.052	127.458	216.153	273.48	281.225	367.575	167.423	166.275	241.132	159.885	173.485	173.373	207.873	262.688	165.75	75.5625	359.08	439.943	456.18	528.008	659.975	503.79	309.243	153.61
608	239.639	264.59	191.77	172.85	231.474	204.935	202.524	286.31	226.84	421.626	838.621	336.651	205.076	228.586	325.385	201.31	51.2137	85.13	116.438	286.481	450.589	519.029	157.151	86.6762	240.654	236.491	213.32	392.675	645.404	560.874	293.13	173.689	171.676	281.68	179.025	133.408	557.869	175.525	214.249	197.713	84.725	250.898	409.006	380.887	596.304	316.881	919.105	447.451	206.254
609	169.8	214.819	160.718	187.118	175.74	193.824	192.069	308.024	170.679	392.883	620.521	304.526	195.454	195.84	279.754	90.1514	53.7875	57.9069	106.211	236.524	249.096	434.919	124.25	51.1333	238.226	154.658	158.726	217.868	402.085	357.104	390.546	129.835	163.422	235.149	133.985	100.44	486.253	97.45	223.804	175.149	86.6333	336.875	582.921	258.399	639.9	428.804	420.633	414.854	326.594
610	189.193	210.146	375.71	271.02	163.613	161.968	268.23	338.445	82.1388	113.673	287.085	188.364	160.623	123.703	488.947	285.059	79.7062	96.44	163.1	204.554	123.779	254.016	133.796	51.1037	185.745	92.6188	81.0313	220.227	213.433	173.928	204.534	128.25	111.096	222.143	95.2887	130.354	188.697	152.17	341.959	231.665	146.072	296.577	465.586	356.419	407.829	305.543	389.039	311.467	200.806
611	114.177	130.71	52.1262	105.212	131.825	164.094	118.856	163.118	192.431	215.733	293.552	165.54	156.215	112.318	154.305	121.505	117.993	117.729	134.217	211.969	110.927	187.854	160.651	50.9512	180.5	85.0583	83.8476	170.773	227.292	219.083	196.375	162.3	109.024	240.858	93.1083	174.66	185.49	159.455	227.052	167.536	59.0274	374.04	434.702	382.118	233.915	386.82	342.639	282.963	161.415
612	363.631	555.9	256.134	445.346	208.43	144.414	386.563	244.671	522.806	368.563	284.957	684.91	246.081	218.344	261.179	308.053	132.891	108.731	266.689	138.909	487.075	528.808	121.52	50.8888	488.871	313.071	276.75	638.531	965.982	499.185	899.235	176.693	177.393	492.598	418.731	209.834	769.125	259.697	468.281	406.99	428.251	460.94	727.045	551.304	985.59	529.39	513.701	651.16	291.994
613	198.819	226.082	87.3226	87.5048	137.881	118.068	221.136	197.23	65.4821	538.33	846.644	248.504	178.718	128.454	302.005	97.344	85.5595	90.7726	50.8869	156.444	390.198	413.898	166.783	86.1333	204.24	300.106	252.7	332.31	634.758	506.873	458.888	180.574	301.931	308.374	188.211	242.756	416.963	208.02	242.668	362.158	155.885	323.935	566.875	410.343	917.349	652.892	614.451	635.18	407.324
614	158.801	282.055	60.2925	153.723	293.19	81.8875	216.64	146.833	604.813	322.105	695.271	315.204	324.825	202.84	444.581	172.549	212.971	125.1	282.87	182.673	198.689	212.889	348.689	50.7275	708.43	160.574	214.077	371.585	357.728	613.225	486.483	363.836	803.827	441.216	392.836	798.2	154.273	429.485	271.289	611.575	197.232	465.404	1115.67	1090	634.375	1343.87	1175.23	405.158	311.496
615	254.255	348.543	81.55	145.601	120.846	103.295	229.039	158.338	354.373	187.723	827.816	408.239	208.831	141.973	177.83	78.3525	179.602	221.273	191.095	171.275	335.277	349.78	79.7037	50.6688	194.824	220.129	176.674	334.517	464.946	510.169	277.871	181.759	216.368	347.159	179.893	170.193	265.587	128.116	62.1138	308.37	144.251	403.611	234.048	804.896	543.359	712.528	430.509	211.759	272.799
616	195.024	289.635	178.714	148.335	145.817	77.3155	213.802	149.87	247.719	259.768	762.398	505.051	126.369	102.11	145.686	62.7476	171.138	176.261	106.663	109.59	251.598	251.567	91.1083	50.644	131.51	184.117	174.102	239.649	376.648	416.1	385.49	431.769	200.126	360.723	165.129	144.932	421.568	108.431	164.537	250.157	134.886	378.885	909.792	843.627	514.775	791.711	437.819	539.838	343.923
617	333.643	202.125	245.448	256.448	243.963	245.026	213.498	350.602	190.456	261.664	382.762	285.561	232.255	279.556	494.212	266.039	160.726	168.426	245.336	269.508	285.188	398.481	188.563	113.932	176.855	50.3798	54.075	157.105	93.4607	121.937	154.036	54.8274	61.7512	151.648	81.5274	105.735	109.72	85.2155	230.018	146.973	68.6714	169.011	188.549	177.648	174.65	194.617	253.156	126.024	112.031
618	208.146	216.441	93.4087	97.335	182.354	136.412	156.696	169.416	122.468	427.559	794.681	268.191	175.378	111.95	275.309	50.3563	52.8338	63.1163	98.1287	221.602	302.962	492.08	130.833	60.365	189.085	176.641	167.82	308.625	499.757	373.433	340.659	117.911	161.091	205.93	143.13	95.6425	396.189	103.401	218.658	57.69	78.3612	395.731	187.715	317.97	603.925	282.384	182.47	211.779	264.212
619	114.101	131.339	50.295	105.474	407.368	176.685	195.14	142.51	395.881	234.376	916.376	297.421	287.361	97.9875	394.725	78.69	243.846	105.679	301.806	151.96	159.744	114.768	476.461	60.4625	442.65	267.908	166.494	484.891	376.22	383.814	354.404	406.652	419.647	507.085	298.229	573.454	306.599	454.881	249.173	416.759	265.423	386.609	678.702	932.81	458.485	1271.43	919.939	342.933	155.673
620	180.162	217.84	287.495	185.094	238.278	251.674	291.894	224.199	297.356	463.798	908.285	319.199	168.676	119.382	280.289	82.4613	108.215	50.2475	124.558	318.564	197.301	211.925	184.387	82.9875	296.81	201.838	232.976	462.441	821.47	627.604	804.477	273.965	239.551	401.371	198.6	140.368	720.68	133.086	193.873	119.363	90.25	226.408	247.274	270.681	699.639	419.168	152.093	499.371	203.004
621	277.731	305.612	162.346	184.455	151.194	50.1905	264.757	174.375	394.556	183.651	540.15	370.362	173.426	143.57	248.249	129.602	226.198	159.815	285.131	142.512	396.487	286.78	119.231	54.525	277.344	227.305	208.481	359.095	527.748	614.525	380.21	409.495	218.743	210.636	424.386	187.787	293.52	190.393	113.746	281.99	135.439	199.87	521.168	743.304	509.392	709.075	288.851	211.006	206.229
622	225.286	191.82	117.786	127.16	138.894	92.1071	123.156	298.361	148.829	327.481	397.098	243.024	173.523	274.781	324.094	141.787	112.364	213.323	142.806	212.921	298.03	422.131	221.58	149.145	241.956	50.1488	70.3881	195.676	129.031	166.54	182.355	117.279	100.162	222.396	119.688	142.852	207.594	128.581	233.406	133.238	68.3464	348.356	513.96	398.012	527.708	381.717	537.224	227.242	167.935
623	251.204	234.266	200.605	223.671	102.829	83.16	222.085	168.475	209.745	155.796	456.791	333.382	241.096	172.778	164.309	135.849	213.561	173.908	120.386	139.624	280.505	319.314	103.878	49.9288	240.605	165.85	144.741	245.87	440.128	364.806	392.315	187.085	167.423	287.363	197.935	104.343	179.424	89.8462	62.0112	286.084	79.7375	346.592	458.589	517.534	590.668	532.119	364.944	201.211	181.706
624	512.124	946.559	49.8025	486.564	706.179	871.332	575.759	969.96	1913.57	1247.14	1424.2	1196.03	628.441	1326.89	995.918	2418.78	199.281	858.211	967.091	1179.89	1070.92	836.178	1317.76	370.928	1304.64	474.549	467.245	1178.58	788.347	1608.72	819.284	390.765	927.633	1256.23	1086.73	1120.82	507.603	1264.46	893.242	491.996	454.439	1443.44	2283.37	1513.64	2253.19	2350.19	2896.89	1078.83	659.183
625	509.931	567.933	233.416	371.007	260.438	148.391	609.71	132.456	1045.98	130.685	1744.46	1088.26	481.275	157.026	241.553	75.7975	525.024	138.561	378.494	145.676	741.696	226.566	297.788	49.7775	610.074	671.711	870.63	1364.69	1729.89	2497.87	948.408	622.756	1046.86	1199.34	532.794	705.189	310.31	702.385	147.344	1444.79	420.286	267.509	843.158	2374.16	665.497	1723.24	709.866	374.124	331.095
626	110.179	149.38	49.5988	75.9712	121.089	130.346	129.014	162.881	231.565	184.938	373.81	202.236	176.376	179.7	225.271	190.893	84.73	120.088	247.701	168.558	116.774	190.329	119.358	67.5687	210.48	79.2537	108.334	184.104	159.253	231.123	224.921	172.338	187.846	220.352	90.4463	165.779	62.8837	332.3	200.126	223.66	68.6437	286.418	400.438	310.401	340.179	438.779	307.451	188.195	145.869
627	387.587	292.49	168.288	164.571	199.423	122.211	356.518	246.951	712.902	228.78	771.764	357.301	362.262	157.889	164.36	101.677	220.987	187.868	300.464	183.176	367.106	304.819	97.2155	49.4214	275.386	398.768	243.239	343.64	793.43	581.03	508.561	325.46	274.519	461.193	293.921	194.319	417.442	168.281	99.1202	377.732	164.513	378.89	511.086	495.642	496.135	815.157	329.679	271.326	263.077
628	327.811	284.73	242.531	225.994	216.901	221.129	321.715	316.61	313.462	300.104	569.424	302.193	304.241	222.126	291.053	168.235	128.136	88.7662	265.378	248.496	341.53	414.264	138.12	89.6038	134.193	165.614	115.494	275.525	474.186	367.368	422.62	156.625	149.594	173.931	289.628	130.406	214.183	77.905	49.3687	377.113	122.83	378.007	447.874	548.266	445.618	597.481	316.954	131.594	199.708
629	525.563	1265.62	177.19	296.224	359.286	241.471	737.761	259.314	433.169	476.221	4294.27	1307.59	520.077	161.792	376.589	121.199	182.224	122.918	316.925	299.449	617.649	654.229	125.056	49.04	665.342	757.681	625.766	861.085	1192.59	1480.03	592.226	882.759	968.026	945.066	491.081	537.847	1568.71	407.62	164.818	460.389	340.233	336.841	941.725	687.347	1289.29	1270.46	1124.4	356.476	409.141
630	417.824	338.564	278.753	423.193	982.915	578.737	337.217	283.506	807.739	484.396	836.89	486.949	563.71	739.801	486.689	466.299	1013.05	299.876	634.153	639.788	503.705	381.946	395.321	134.669	871.445	245.45	226.13	795.487	515.143	579.584	648.994	306.654	436.436	879.842	297.119	409.092	807.581	535.819	136.838	134.394	102.9	646.339	950.783	898.154	776.56	934.934	1449.44	415.202	186.058
631	230.19	226.726	70.84	120.274	101.136	76.0987	144.19	170.709	147.982	185.686	544.217	290.046	240.629	183.35	142.093	50.0225	145.815	144.909	126.132	151.41	236.806	292.645	76.3825	48.8275	188.356	161.452	150.279	269.265	325.96	331.656	408.446	193.159	131.607	282.086	183.441	102.61	221.935	83.2087	127.271	278.366	80.3162	465.601	523.034	576.558	477.471	634.648	374.259	282.006	307.413
632	227.613	272.955	132.048	179.254	89.5162	119.18	250.718	242.96	176.928	229.223	574.406	396.674	131.507	159.403	187.779	99.9963	137.786	188.665	145.373	178.774	264.859	305.784	153.844	48.72	259.106	134.605	132.304	272.661	289.406	381.644	222.179	149.537	141.183	165.349	211.294	115.498	137.974	104.231	128.125	179.876	136.88	361.989	622.492	559.6	630.938	636.515	439.723	272.821	200.313
633	597.19	418.34	516.071	314.613	468.438	500.534	371.175	1419.11	1578.92	653.516	1508.6	795.194	675.133	488.384	903.254	603.815	1303.55	460.874	629.06	738.571	345.479	536.739	1603.45	209.162	849.884	357.269	292.961	1299.77	725.544	685.621	1828.65	633.205	785.283	1034.39	463.426	561.783	558.66	470.956	210.963	213.375	236.313	469.132	680.602	785.946	472.696	1606.64	716.673	442.214	48.5588
634	367.294	434.194	235.91	239.829	214.735	124.917	342.394	380.638	115.421	367.375	367.283	157.694	318.075	250.104	713.727	237.113	101.752	112.8	114.373	243.294	398.988	470.954	96.4615	103.683	113.2	48.4692	54.2654	105.108	239.596	128.198	218.654	76.9808	72.3192	108.052	59.0019	55.5538	195.662	93.1827	147.717	144.729	62.7788	109.123	280.098	163.144	245.717	185.987	215.629	146.902	258.454
635	204.545	171.283	48.4548	120.105	232.183	173.718	142.32	137.087	480.792	163.788	558.132	162.275	331.268	173.429	182.68	110.346	236.846	122.175	243.423	264.213	165.996	135.323	160.025	50.25	315.413	149.331	157.443	299.858	225.099	327.111	286.092	193.126	273.146	263.158	177.385	270.262	199.412	302.055	243.248	340.658	135.249	385.54	306.395	471.823	269.767	803.008	708.11	241.019	204.99
636	177.329	610.745	564.354	402.16	261.615	122.294	320.944	384.805	165.97	452.576	204.436	1067.67	226.901	268.729	398.832	258.253	122.546	59.0575	148.106	162.755	249.743	518.086	76.365	48.3988	156.581	146.869	238.852	425.631	314.248	332.151	1458.04	158.11	65.2212	470.738	147.935	118.719	258.706	64.9925	662.409	298.728	412.049	538.236	874.008	286.356	691.55	221.486	285.349	685.09	425.345
637	273.174	273.719	188.07	210.257	112.005	98.5548	203.496	228.306	329.633	235.57	444.496	284.726	201.689	153.539	251.608	102.638	117.535	101.698	171.858	203.273	275.821	368.923	74.2988	48.381	215.063	174.349	159.618	289.682	484.14	449.407	362.457	195.88	207.489	231.683	212.342	96.2905	346.643	84.1821	84.3667	243.099	79.4512	345.688	637.892	526.367	604.754	548.208	311.464	235.968	227.58
638	279.892	229.583	250.254	245.783	224.742	146.467	175.654	208.196	143.075	309.379	724.021	308.821	294.954	292.233	363.008	276.504	165.15	91.8542	132.533	150.037	367.879	473.125	138.908	48.3333	284.192	218.988	225.658	522.233	665.142	409.65	474.983	190.683	298.658	422.175	154.921	134.404	336.583	170.629	309.342	145.371	163.713	358.883	388.788	497.908	700.225	539.275	633.779	472.575	464.725
639	253.702	380.55	75.8487	73.8225	240.75	73.3238	218.464	65.8363	145.069	316.785	1419.69	238.973	367.514	135.734	227.159	125.549	115.598	56.7037	140.855	159.571	533.405	394.096	187.104	52.2137	441.205	807.59	574.264	1049.68	1520.59	1500.4	718.048	462.131	226.96	495.952	439.324	402.619	723.47	530.861	189.474	66.0812	54.5975	245.376	193.229	943.976	1381.2	473.444	320.753	447.204	155.488
640	260.115	430.527	71.4667	202.129	212.95	61.9417	245.433	144.198	581.593	292.881	1890.92	483.436	167.611	119.583	147.627	61.7881	191.973	196.126	309.435	130.098	308.762	325.418	171.355	48.2167	228.406	179.386	155.85	459.218	608.702	593.025	295.894	265.056	197.689	268.085	238.469	149.502	435.093	126.96	117.25	435.427	235.92	423.885	333.611	1106.11	667.895	864.992	705.34	346.111	371.185
641	99.6088	131.359	85.395	101.704	136.726	119.073	152.343	169.749	230.301	157.345	248.928	163.009	105.95	92.9038	227.088	128.651	80.2662	88.61	104.036	141.87	77.9425	154	89.8925	48.2037	202.151	92.6275	85.5463	170.86	237.088	135.167	231.839	703.736	99.1587	190.602	97.6363	166.279	132.855	188.425	190.415	125.454	68.2525	194.355	338.399	311.101	396.661	369.481	398.604	233.451	146.711
642	201.274	278.98	154.46	151.452	101.186	72.7938	216.275	255.908	176.715	232.8	432.572	379.75	259.71	183.452	175.197	79.235	205.938	224.344	158.17	193.499	239.279	391.895	89.9575	48.2013	243.974	128.529	139.755	405.125	374.464	361.668	413.374	172.901	104.878	348.589	186.151	81.9038	215.408	72.2013	108.425	215.08	89.9163	296.524	174.852	140.283	481.21	111.86	261.519	210.491	228.813
643	174.83	256.924	73.0583	137.039	185.032	156.258	198.76	199.418	334.02	272.4	624.245	260.11	171.121	174.915	251.564	178.099	157.024	147.606	205.464	237.165	419.751	231.554	281.607	48.1738	595.385	139.777	189.892	440.919	390.898	326.735	453.835	285.343	417.926	642.012	229.971	412.361	243.164	125.04	325.538	311.065	196.561	416.402	830.358	1147.3	532.776	677.415	1347.99	368.658	183.482
644	82.056	173.692	74.744	71.3488	120.943	101.017	99.1298	154.035	48.1369	260.736	320.168	161.505	170.567	94.206	175.356	144.082	57.7024	106.305	54.7976	232.835	152.408	222.752	78.3107	54.0619	175.913	122.064	155.862	157.895	221.614	514.002	295.727	210.725	170.149	129.719	77.1512	90.1536	102.614	210.796	244.551	141.514	75.9226	110.1	479.139	518.358	419.055	334.539	218.34	272.479	218.682
645	120.459	140.594	93.04	121.397	143.91	81.5212	139.526	147.226	49.4862	322.369	413.635	257.765	133.206	95.1213	154.57	52.5938	67.4587	63.075	53.67	114.784	196.79	377.654	130.656	61.6625	137.421	104.115	139.689	168.581	265.526	261.553	408.429	119.09	117.98	185.895	88.3088	92.76	205.356	93.445	136.146	131.621	48.0513	181.813	337.524	191.074	798.594	343.387	448.979	467.548	146.249
646	143.861	118.439	79.9387	84.635	190.894	134.891	143.463	163.011	69.3688	304.734	487.685	143.229	236.498	139.466	171.305	49.13	104.334	104.495	91.6312	255.579	189.686	343.204	106.776	95.28	152.749	212.184	202.253	327.335	408.475	366.88	317.916	179.041	159.654	276.962	113.654	153.548	302.011	153.194	98.375	80.5875	48.0475	149.004	246.386	250.982	404.71	372.548	255.719	286.188	126.446
647	281.123	307.445	198.805	214.723	212.535	122.09	237.81	210.59	166.005	292.738	716.42	279.128	259.108	158.565	347.975	162.015	93.215	74.8975	91.665	203.265	300.82	381.938	174.548	48.03	376.522	177.768	222.363	350.545	725.425	507.25	579.16	213.438	305.58	373.98	153.82	144.21	679.438	165.072	212.107	368.577	85.335	267.96	610.75	547.32	671.71	585.155	850.865	542.232	365.89
648	511.331	431.512	130.923	266.81	182.292	61.9975	209.193	103.214	1080.8	201.333	248.403	478.065	240.819	159.161	238.466	244.664	219.609	84.88	267.118	66.115	371.601	351.724	160.861	48.0162	510.391	246.363	286.736	1337.63	1205.95	550.126	699.941	163.954	163.393	707.068	502.158	257.642	498.748	276.693	127.718	443.048	371.451	213.985	504.814	337.674	565.91	621.847	537.286	474.793	113.681
649	294.167	303.536	411.146	315.492	167.435	98.1036	200.577	178.618	249.849	175.214	193.483	371.308	176.061	149.475	244.727	248.921	122.5	106.767	130.826	66.7595	268.392	348.207	153.49	47.7881	304.96	150.771	210.158	455.11	484.598	393.395	1786.02	88.6036	82.2226	397.038	171.025	139.435	371.29	111.289	311.524	280.929	411.617	317.946	342.94	305.045	571.587	290.538	333.981	317.91	240.188
650	110.782	102.137	82.7881	83.1298	134.696	103.068	122.324	127.005	156.611	159.967	212.054	111.73	166.486	98.7405	149.281	85.6929	148.436	182.25	171.114	102.44	126.815	96.244	208.381	79.4131	161.092	76.3036	84.6821	212.906	203.462	196.543	204.023	161.557	97.8548	250.051	76.0405	152.717	208.062	158.754	150.392	132.383	71.4393	231.057	282.781	253.32	273.013	271.113	225.099	198.843	89.6893
651	290.625	399.058	219.778	278.305	185.185	138.319	378.311	337.358	329.163	309.224	1174.2	625.919	319.467	178.164	208.542	95.5088	184.408	173.044	247.76	224.466	339.455	379.603	94.78	47.575	258.886	261.712	238.387	520.418	683.446	745.188	548.446	278.723	285.212	424.914	296.765	227.435	516.602	164.609	153.696	335.9	231.468	440.848	537.181	397.991	1001.7	604.691	639.564	201.024	200.352
652	354.974	326.119	47.5737	188.559	518.664	312.801	314.788	192.662	1281.89	429.43	1504.62	393.684	298.311	427.116	634.069	306.191	394.869	166.504	762.624	367.079	550.018	306.58	293.739	67.6813	966.943	365.866	218.414	1028.81	632.706	730.041	564.987	193.844	656.946	1061.26	401.604	676.612	450.645	839.803	305.76	504.591	332.592	378.12	650.346	1152.6	657.484	1360.7	2308.94	225.253	306.671
653	307.524	886.799	448.789	705.191	489.096	146.394	157.191	316.345	1206.33	268.986	983.42	1191.77	1617.35	422.599	853.25	191.111	395.955	123.983	229.581	105.033	859.146	1147.91	218	47.52	695.495	1016.63	549.082	1030.33	2763.58	543.054	3163.63	429.869	166.74	1043.99	1434.95	605.454	1309.25	318.544	722.84	1031.59	1763.97	739.935	1410.95	533.675	1917.57	864.818	308.246	943.896	565.597
654	145.524	208.537	98.3786	190.35	94.3107	61.4095	253.877	203.371	151.551	261.133	447.064	413.473	151.849	122.386	123.825	83.9429	124.954	175.37	157.173	157.399	310.098	215.939	76.5167	48.4988	125.655	101.083	134.662	161.262	138.324	373.76	221.627	163.212	85.1595	173.225	146.595	89.6607	179.446	93.3452	155.079	193.162	97.8024	250.526	167.15	416.96	329.926	379.033	219.804	255.205	180.42
655	130.265	191.077	143.819	161.645	164.818	109.193	162.53	199.331	139.37	355.396	688.184	174.398	183.341	106.77	168.048	100.098	76.9087	69.6363	79.7987	170.537	172.014	244.214	152.94	47.2425	255.32	224.615	212.55	353.034	539.886	412.691	334.395	238.025	170.227	321.999	127.559	124.198	387.394	169.031	153.009	174	79.0775	187.153	402.051	362.212	491.636	416.546	463.322	387.379	192.658
656	181.199	348.535	98.6925	163.374	146.465	94.6925	213.501	126.365	186.331	226.956	474.827	423.053	207.35	277.379	249.584	237.751	86.465	163.174	204.023	157.36	316.816	194.852	141.426	78.3563	313.724	146.238	181.07	253.589	323.225	463.22	272.285	123.162	138.558	279.813	158.736	124.119	46.9963	166.188	382.261	380.29	220.792	533.136	800.949	468.053	646.216	704.295	426.875	394.69	575.02
657	121.918	99.1375	2169.62	831.095	411.695	473.939	148.221	227.107	159.223	591.44	512.136	780.107	184.8	467.07	415.507	1014.22	175.439	46.9462	104.59	386.855	104.914	400.298	201.665	62.0725	2128.05	91.7225	109.238	142.485	116.824	140.723	122.766	104.626	192.275	515.158	115.513	215.865	339.405	97.205	257.921	219.534	126.348	351.635	605.758	235.261	678.405	1162.75	1045.91	274.892	173.545
658	159.253	322.801	149.076	129.923	253.999	126.283	132.08	123.533	143.015	452.416	578.195	319.914	243.314	204.239	185.475	272.389	77.615	78.93	92.0812	217.286	368.485	376.993	127.791	69.455	282.851	162.09	217.615	321.519	480.536	614.421	412.527	194.526	169.211	312.411	105.912	140.915	458.603	213	182.939	164.645	56.81	210.635	504.322	401.72	636.658	339.891	661.551	396.819	216.363
659	374.141	340.824	310.178	344.619	107.308	100.62	233.951	126.524	607.149	162.12	138.711	276.014	237.179	186.291	369.06	199.235	104.498	122.14	192.088	109.691	398.654	420.874	145.69	46.7338	291.615	243.095	205.091	414.605	538.589	407.226	355.821	62.0975	110.374	500.701	297.563	179.88	296.494	129.588	358.166	262.679	382.659	400.089	382.921	464.891	740.944	370.527	682.944	432.363	254.963
660	544.285	633.256	112.081	246.736	172.514	132.079	234.667	345.954	267.916	149.506	1546.06	686.239	179.243	266.555	430.896	172.389	104.906	115.03	238.91	186.549	582.554	363.301	287.941	46.6625	422.69	522.673	263.145	443.483	777.526	424.244	304.564	280.044	403.13	224.564	276.353	356.985	316.332	350.354	322.401	471.767	208.115	620.398	1267.81	940.789	1330.52	1523.9	930.499	480.095	658.864
661	2817.29	2208.49	1434.34	2012.36	621.434	442.485	1703.14	635.09	1282.28	664.791	5827.68	2983.48	1194.71	1484.71	1938.55	2739.77	2224.25	555.519	983.95	626.428	3350.75	1535.72	1235.76	196.929	2567.47	2556.78	1752.48	2699.6	5064.85	3921.31	2793.26	1592.57	2075.42	1732.02	1753.66	765.511	1686.31	1482.5	200.361	728.138	338.249	223.798	1571.43	5290.96	2879.45	5127.44	2292.22	432.44	567.674
662	134.02	790.174	483.984	242.609	250.805	312.244	85.74	167.575	158.749	1867.9	741.621	978.81	542.25	334.916	144.993	154.854	271.564	495.59	66.715	369.202	76.1462	486.524	46.5825	127.995	173.077	123.882	273.715	237.145	943.4	428.589	941.356	707.232	235.295	439.784	128.295	167.329	452.147	126.051	629.732	453.94	197.696	959.015	1763.16	1359.74	2504.88	642.185	526.365	2163.37	1186.11
663	165.305	320.508	94.1107	158.962	73.0095	92.4619	231.661	197.293	326.648	293.907	370.179	422.643	165.336	163.776	149.187	100.579	112.068	300.138	106.863	150.531	278.715	417.468	46.5595	77.706	119.636	120.526	180.726	177.005	342.169	426.177	369.092	267.045	143.275	159.383	208.825	138.371	259.321	101.086	118.119	139.914	82.7833	256.5	514.318	466.119	499.852	329.182	331.24	394.571	183.79
664	461.071	492.184	214.881	218.704	242.012	212.97	520.138	384.202	518.545	455.798	2001.05	4076.93	436.18	164.186	283.044	114.666	218.385	257.355	299.743	309.531	484.304	567.88	119.456	46.4175	394.494	437.071	300.844	520.269	743.249	748.445	599.18	441.783	324.86	630.866	300.066	207.101	693.791	156.61	170.474	521.08	249.476	824.179	778.276	905.985	1014.14	1512.37	792.445	700.355	538.109
665	199.857	246.557	217.789	375.65	106.743	147.143	186.418	196.475	198.971	232.282	139.1	348.196	121.35	184.161	264.8	190.139	52.025	82.2214	141.289	88.3571	247.518	402.307	68.8286	46.3107	315.154	121.311	135.068	373.546	396.2	304.589	340.993	60.5536	61.8214	266.036	102.482	60.9643	364.514	49.7607	185.936	211.018	120.886	301.086	398.593	142.014	543.621	261.168	253.807	193.386	114.354
666	156.485	166.248	86.3263	83.7138	73.03	56.0025	164.691	93.3475	152.881	134.071	606.031	291.23	99.71	91.2163	72.5863	60.7762	149.696	105.959	154.54	60.2338	181.298	270.276	74.1825	46.3075	163.191	157.075	101.873	151.605	357.076	282.728	286.853	168.886	88.6813	174.56	142.759	111.408	170.348	103.896	102.199	153.67	63.0087	182.46	345.876	322.507	350.13	299.962	283.253	186.476	143.839
667	144.468	105.558	73.406	83.981	95.8893	133.848	86.1798	151.812	165.38	183.693	241.276	135.856	140.904	116.812	208.637	146.487	73.4548	117.471	141.594	194.404	138.956	152.27	132.998	53.6976	253.845	77.1095	71.3905	140.104	210.115	165.692	164.571	108.027	85.3143	216.448	91.5571	134.805	150.954	115.973	169.445	141.319	51.6762	226.813	286.611	283.67	301.31	337.28	336.74	186.342	112.32
668	411.692	444.744	203.077	335.552	227.478	134.052	123.209	99.0766	344.2	218.823	202.048	364.545	162.798	126.103	283.458	126.683	158.497	119.197	279.395	112.022	370.153	475.456	114.661	46.1781	383.586	297.82	264.044	651.702	610.97	532.003	618.253	91.4938	133.814	717.408	219.108	178.116	326.97	134.934	572.328	538.688	434.802	563.295	595.556	427.442	984.911	559.292	711.672	652.386	552.733
669	85.8538	308.873	120.276	186.946	265.892	93.2562	211.558	142.943	290.31	285.48	1667.69	668.72	97.4963	83.3037	97.0275	76.8137	253.943	187.658	360.826	158.741	136.721	135.271	110.616	45.9625	174.715	206.141	148.4	482.661	579.059	420.99	340.933	339.095	232.012	350.46	276.808	203.34	667.766	131.01	147.778	391.851	191.176	215.154	799.372	948.741	607.318	901.045	521.538	366.605	246.455
670	244.39	668.661	45.8488	146.558	416.443	241.549	299.798	192.345	286.887	879.97	1547.23	560.181	538.499	495.535	334.665	392.691	113.43	212.08	226.249	639.314	632.836	690.357	351.142	198.049	650.561	622.051	517.548	573.936	1303.3	1510.94	409.645	550.778	395.913	602.487	411.228	303.124	622.374	521.53	440.965	118.522	173.155	632.727	336.585	656.285	1226.55	349.86	1406.21	953.034	526.568
671	220.156	198.7	172.569	135.03	124.62	104.055	197.473	189.732	202.904	179.667	524.396	214.976	184.759	132.049	221.787	81.8588	104.139	111.185	161.24	141.229	227.577	296.551	64.9025	45.8162	205.31	125.145	92.5463	225.235	356.678	305.859	286.691	139.368	84.8875	246.393	163.284	65.9938	219.369	55.4075	100.149	213.134	75.3088	337.746	512.143	416.171	461.611	435.591	392.26	206.465	266.6
672	341.098	390.225	278.586	143.3	161.202	52.2875	356.808	207.943	416.43	303.132	1571.22	397.293	242.326	118.78	205.7	45.8	154.641	147.273	182.974	196.189	363.905	408.661	107.439	50.2325	179.105	272.447	136.471	307.048	427.511	452.449	258.699	265.851	181.433	406.355	146.239	123.893	502.771	148.421	100.543	424.281	138.744	511.345	442.68	601.038	365.632	672.965	393.794	291.125	316.84
673	299.262	382.73	341.78	402.774	193.098	139.085	260.858	2619.3	558.62	226.292	191.486	656.916	208.834	148.096	304.613	275.414	96.8825	111.13	207.113	107.725	343.266	401.964	112.729	45.7825	353.315	190.736	193.615	441.346	589.83	358.064	526.129	88.2575	107.69	347.814	178.459	112.693	658.661	122.879	214.961	235.321	207.128	253.895	257.499	277.626	520.87	294.855	256.207	258.544	135.684
674	275.55	690.251	151.999	270.615	122.132	131.194	437.375	312.154	325.478	168.886	491.913	672.351	171.537	179.116	203.533	236.69	344.895	259.147	164.466	174.39	505.736	409.574	60.245	45.6187	514.456	361.642	488.248	275.202	648.619	1301.57	377.387	363.479	606.168	236.676	280.576	263.466	248.589	279.429	102.321	601.893	114.846	400.113	931.78	1192.28	894.826	1329.38	911.9	433.349	500.952
675	69.9188	76.335	59.8687	60.2963	111.461	126.501	70.3187	99.1513	128.738	170.92	218.869	133.544	143.574	85.8475	170.095	121.881	92.71	74.4775	78.3812	141.135	101.253	123.246	99.795	45.585	239.805	99.1488	77.0025	159.964	159.235	163.683	256.291	164.824	126.795	198.091	111.25	143.523	151.874	138.885	128.17	110.666	57.6863	309.079	243.482	217.093	297.776	439.009	333.116	175.518	84.1937
676	280.053	382.65	225.185	490.655	169.759	105.6	170.202	257.005	306.668	252.264	181.146	399.13	265.045	210.291	331.952	200.429	77.09	82.3337	201.965	109.271	356.559	511.897	69.7412	45.5825	336.733	230.654	235.006	556.712	687.91	470.642	687.106	80.3413	109.516	425.488	262.473	155.874	377.75	138.076	332.984	320.674	252.098	375.777	392.678	259.318	759.865	387.668	322.946	421.66	210.3
677	404.809	548.043	194.403	254.661	175.643	180.449	406.94	281.934	561.861	368.188	760.416	431.586	187.473	175.829	217.951	205.429	126.335	121.043	201.724	279.92	601.474	402.13	63.77	45.4787	255.255	180.719	173.329	340.396	566.679	575.135	333.801	206.249	283.595	256.711	221.278	134.454	509.789	105.713	122.806	190.083	92.645	254.024	585.189	538.641	492.149	374.481	282.846	237.434	239.024
678	390.859	1109.84	472.331	436.519	129.398	170.618	319.561	134.699	96.3738	435.151	1314.37	1686.22	300.337	198.792	210.901	45.465	509.772	392.374	219.839	127.685	374.506	542.99	71.16	114.731	296.469	287.255	273.831	408.248	1085.01	472.244	1323.34	776.701	370.363	589.322	357.67	198.245	299.31	222.874	196.171	608.061	405.726	1115.39	912.308	1524.08	2283.28	582.439	602.031	675.554	1135.12
679	579.018	733.479	113.911	230.333	223.468	90.4025	377.97	175.658	513.288	204.357	1470.78	575.503	196.175	136.643	272.701	80.7438	150.639	147.55	342.279	99.505	899.819	571.46	78.0475	45.3663	470.76	468.566	439.375	748.048	860.021	1065.1	497.221	527.693	462.919	655.146	513.482	319.994	210.618	341.003	145.124	851.861	270.507	508.495	1188.03	1561.62	1318.18	1545.31	1210.25	467.515	569.135
680	381.499	506.946	394.483	398.104	110.084	86.105	62.8937	143.529	251.461	280.345	158.969	339.764	200.906	218.836	632.768	171.195	77.6863	65.1388	123.869	58.6725	316.767	521.915	87.83	45.325	306.043	179.012	169.684	353.046	407.44	351.346	489.632	67.4063	129.643	355.868	163.424	140.308	354.379	83.12	332.53	313.311	166.06	440.369	561.976	353.845	663.018	305.655	623.581	325.582	394.609
681	309.756	301.051	317.443	366.809	162.42	123.043	225.156	198.266	327.114	286.654	172.89	422.435	190.471	203.745	413.439	259.355	148.533	88.96	152.256	104.93	297.878	340.361	144.101	74.3238	164.149	123.484	117.496	234.589	200.204	210.501	247.474	45.3025	52.2687	192.886	103.339	86.5613	84.0138	71.285	148.246	274.238	171.947	264.79	183.049	131.965	302.75	148.611	96.425	172.363	164.116
682	476.408	494.459	324.785	420.522	226.696	154.098	207.056	157.234	703.716	220.794	243.645	496.144	320.364	152.115	486.132	276.409	169.466	121.97	185.255	126.694	440.569	447.989	113.986	71.1262	448.469	341.34	366.118	634.964	617.364	576.097	590.739	124.764	181.141	511.68	343.299	210.803	467.3	236.739	85.545	111.05	208.839	49.0538	412.08	108.2	643.053	633.201	998.607	375.829	189.371
683	111.985	113.635	47.6688	103.358	198.708	200.224	142.869	194.87	137.251	255.482	251.706	168.221	94.0175	95.49	171.379	140.799	87.9463	107.818	152.726	207.148	75.8312	120.147	234.036	61.55	171.431	55.3137	80.42	178.637	137.102	198.491	157.857	108.143	133.579	160.251	109.369	264.017	153.355	146.735	171.209	138.321	66.22	247.789	283.342	326.08	262.978	446.026	390.618	146.469	71.3025
684	409.543	585.651	260.779	1120.47	203.31	84.9275	1002.08	707.375	403.899	1167.59	100.945	636.602	1091.76	669.894	584.87	444.743	114.876	329.229	123.156	262.829	514.29	3569.15	154.561	44.8237	195.278	113.66	317.64	337.315	620.872	1395.09	116.029	320.7	289.32	631.001	1769.58	183.335	827.232	89.0525	1368.61	749.384	340.015	524.74	909.269	2984.47	448.753	519.318	161.971	328.841	640.773
685	298.34	384.199	307.97	414.298	203.845	137.706	271.616	240.058	405.795	327.128	119.073	522.357	231.303	144.854	249.031	172.933	108.783	69.8575	234.279	124.526	281.416	379.423	147.006	44.8062	355.318	253.139	327.571	527.509	745.74	792.76	855.852	150.011	159.211	820.503	323.054	298.035	623.274	158.566	402.395	372.996	654.655	378.07	510.835	339.504	820.148	608.572	663.164	549.602	306.993
686	581.106	672.813	251.444	274.534	311.681	159.197	476.884	480.747	82.4938	547.506	571.197	239.847	415.938	217.578	889.788	294.097	141.787	153.447	133.6	341.303	615.209	672.503	136.422	135.606	84.3531	58.2813	59.575	105.966	198.534	169.156	178.325	75.9219	60.1313	102.041	70.5062	64.9156	230.656	113.313	168.406	155.772	53.2656	163.266	92.6188	230.537	246.241	157.194	192.856	141.081	249.553
687	312.918	326.398	187.039	333.879	180.814	139.992	268.025	270.817	257.015	188.201	220.925	315.398	246.764	206.475	315.817	173.842	112.502	93.7619	197.762	106.24	272.342	320.169	120.899	44.4345	383.294	194.585	196.817	564.664	606.656	402.362	564.538	84.4488	109.769	328.038	195.706	116.133	412.831	131.135	420.4	353.827	269.03	363.523	382.055	379.327	689.082	430.196	405.779	386.38	201.571
688	969.55	1271.98	1239.73	1431.81	839.422	639.442	1379.21	812.639	3277.35	1515.25	906.521	2586.79	656.286	529.186	1233.81	1086.33	70.6417	61.0639	1193.19	772.053	1108.78	1240.1	106.06	44.2694	951.642	623.317	558.311	1075.46	2294.84	1202.51	1681.88	345.783	375.783	841.336	460.874	302.029	3007.77	439.835	559.478	481.701	348.679	511.839	1014.36	988.189	1287.43	747.188	835.883	1018.91	433.579
689	317.321	377.679	242.003	217.261	144.086	159.396	173.833	383.386	44.2437	694.094	735.151	304.346	337.274	344.786	467.845	131.959	113.381	237.128	90.7613	243.929	394.651	1101.41	153.993	171.611	472.929	219.109	277.724	456.248	791.176	579.361	406.441	354.659	294.116	315.853	225.123	158.625	648.209	224.61	363.259	216.056	103.007	451.569	1025.87	754.018	1877.21	676.58	1005.28	875.34	487.043
690	358.319	340.981	166.645	131.918	169.244	159.842	305.789	185.468	522.248	140.508	563.326	244.058	256.383	119.456	138.519	75.8488	144.469	128.481	200.793	137.824	356.33	494.398	72.9881	44.1524	134.796	150.437	102.246	182.826	409.92	451.84	320.896	189.75	100.118	279.119	162.164	85.9036	241.926	83.3381	67.1512	245.955	55.0762	359.215	282.786	284.979	387.515	168.986	265.808	164.194	213.264
691	140.596	166.889	112.823	166.183	77.6976	74.7786	196.321	160.271	186.211	120.502	388.37	320.463	247.637	133.511	97.7655	54.3893	190.502	130.601	116.823	147.763	175.231	178.064	69.5417	45.3524	186.608	178.151	148.8	235.088	525.443	369.588	414.132	206.776	202.844	338.319	231.339	104.189	177.836	85.0333	44.1381	217.801	66.3631	286.07	317.53	455.29	453.95	422.739	279.615	153.51	142.321
692	157.144	260.03	265.793	336.301	108.029	80.8875	175.19	157.334	306.019	153.24	119.545	345.975	120.893	105.534	186.936	177.671	49.285	66.3012	115.911	56.2313	190.194	236.085	70.0062	44.135	239.339	125.299	126.136	330.191	355.354	325.566	393.94	51.9738	57.9975	292.49	125.848	79.525	314.983	82.9775	250.551	201.146	182.95	254.719	289.558	191.373	557.418	235.468	229.409	324.505	134.787
693	134.614	148.896	63.0417	140.317	137.601	122.746	142.849	229.687	226.425	222.092	398.927	150.019	142.84	137.801	273.948	112.746	128.074	153.755	206.832	183.829	256.876	245.856	126.29	44.119	252.04	83.9179	99.3393	249.677	224.615	183.335	364.089	226.593	158.875	229.943	118.076	193.604	233.44	242.142	210.189	148.876	97.9917	350.65	470.218	537.467	411.952	434.388	639.227	351.47	142.168
694	251.71	162.069	44.1036	78.1036	240.732	153.808	132.254	98.3143	469.723	230.848	699.469	292.746	172.907	156.64	308.908	121.348	98.2	104.262	489.504	187.76	144.736	134.171	250.976	48.1679	399.706	189.42	114.158	220.151	290.449	336.915	373.121	201.325	238.532	282.561	144.136	477.367	308.907	426.908	189.736	250.273	179.908	258.225	391.243	868.804	408.839	879.075	1152.77	187.613	149.038
695	115.395	283.433	99.4587	169.843	234.338	377.793	247.365	890.656	542.628	568.801	555.419	915.107	264.611	351.668	731.214	252.316	306.212	119.41	137.162	252.519	199.223	488.558	650.749	49.6187	311.014	663.839	172.158	171.914	468.733	1501.46	925.251	319.092	370.536	336.101	180.916	422.784	133.149	147.468	456.991	342.364	342.909	582.1	1846.68	782.048	1371.07	2900.85	3834.92	822.928	333.395
696	204.1	285.493	222.985	234.415	137.758	142.389	208.668	187.975	195.765	146.618	362.755	213.968	177.54	154.045	256.511	146.681	121.436	87.0869	128.998	211.135	391.446	280.104	75.8381	43.9679	102.685	176.211	127.596	243.956	353.026	191.398	146.707	226.606	108.82	129.44	141.989	107.01	242.963	64.4214	67.2298	204.67	63.3071	270.493	436.094	409.905	362.819	386.948	213.369	220.805	208.583
697	408.65	378.253	326.762	290.665	302.981	306.615	664.291	361.014	904.985	439.946	1141.52	514.5	185.721	157.518	175.374	145.265	141.148	117.348	333.161	372.031	527.04	474.495	61.125	43.8787	219.438	201.294	175.9	407.851	717.039	497.128	390.379	274.709	280.693	391.374	239.795	157.184	635.07	120.621	60.2313	192.98	78.715	250.089	507.029	456.4	412.712	397.392	268.876	236.656	170.904
698	129.926	137.665	55.8137	87.0413	197.73	95.9912	139.24	181.286	955.511	264.875	863.33	128.102	377.679	75.1538	664.712	43.7837	547.739	92.5625	443.796	166.335	95.65	150.586	288.951	54.3162	819.5	285.923	215.261	321.601	359.303	156.704	385.904	1044.64	179.12	177.044	162.011	185.58	342.056	415.466	185.165	358.806	381.27	232.289	582.622	1003.99	303.214	855.026	1788.25	370.481	78.7037
699	557.67	459.782	432.943	321.05	159.837	100.475	400.488	242.335	525.108	351.83	1303.55	845.414	166.061	217.881	203.426	144.218	250.087	277.688	121.973	160.474	298.502	539.952	247.61	43.6452	412.389	153.906	529.692	520.57	669.835	1525.77	302.142	318.639	445.946	306.382	362.332	242.961	463.43	153.365	151.429	450.323	105.59	489.262	807.607	1253.7	789.879	965.436	699.293	323.793	424.446
700	300.116	332.611	203.944	172.438	136.87	142.985	297.603	260.108	307.291	254.593	598.459	336.309	265.608	158.024	230.034	87.2862	144.826	151.791	176.166	201.16	294.32	413.461	84.4375	43.5812	196.809	170.037	140.221	252.159	551.006	367.816	464.381	209.123	188.045	317.856	223.47	96.73	360.335	75.895	67.5863	274.616	78.7375	444.611	622.509	575.352	682.105	497.649	469.636	200.76	225.45
701	103.07	235.034	89.2638	110.963	114.593	68.0987	171.756	174.849	43.5388	128.05	417.481	362.301	105.994	85.8225	100.089	56.6575	91.8575	117.715	97.6425	127.315	107.245	152.139	75.5863	43.9975	150.65	91.6563	101.924	267.156	192.798	217.846	186.356	180.493	144.149	343.92	94.82	99.7275	108.037	59.12	141.952	178.604	63.96	331.326	575.447	348.938	661.841	356.762	208.572	371.161	282.443
702	603.187	385.642	273.076	317.757	235.237	118.482	206.798	1649.74	744.607	225.639	509.19	389.046	497.271	204.539	366.146	198.927	165.488	102.437	1013.98	98.2881	336.967	395.542	105.565	43.3167	318.13	161.458	162.844	1927.02	1569.65	392.162	437.254	108.396	56.3298	281.607	414.576	90.606	1815.83	242.186	265.699	320.188	202.506	285.989	328.619	299.914	506.138	890.742	457.61	272.752	200.21
703	429.532	750.115	676.243	985.885	249.85	227.345	446.938	311.823	599.525	578.115	372.75	938.537	353.912	311.9	501.222	597.082	145.285	112.528	313.45	177.485	535.68	674.58	174.863	82.4867	523.083	337.317	560.745	689.85	1070.16	790.647	1217.31	43.225	226.995	883.613	256.748	239.017	776.697	172.328	908.37	799.33	531.123	796.303	696.13	349.89	1270.55	445.265	826.308	708.453	509.51
704	239.032	184.621	43.1161	52.0518	176.368	134.354	118.679	160.554	519.102	207.391	609.507	193.314	329.834	191.227	365.148	90.2839	261.979	143.25	177.334	206.225	182.845	235.234	164.902	68.1036	480.161	206.25	246.029	378.996	358.977	427.359	338.186	346.67	389.02	358.075	261.391	325.507	243.762	389.854	223.314	462.589	182.127	406.193	535.882	752.295	316.673	1214.89	1477.7	269.116	178.582
705	163.316	103.084	43.1025	134.98	193.206	212.227	197.094	582.769	253.921	269.245	488.164	246.979	214.044	165.753	277.842	138.806	150.5	110.897	159.336	209.528	204.599	175.674	179.018	43.2963	346.229	132.121	144.496	329.606	166.23	544.609	324.424	217.436	201.315	326.915	144.376	301.707	196.439	345.361	217.743	203.371	117.796	391.822	231.776	410.038	295.589	625.88	504.41	209.585	92.0863
706	301.104	338.344	112.439	185.456	108.101	99.1262	245.871	213.683	269.163	217.583	672.441	371.035	179.425	123.798	218.795	75.0313	153.739	146.151	138.632	169.901	257.279	441.656	69.27	42.9925	212.171	175.004	166.848	257.745	418.244	435.275	392.197	187.146	175.111	267.216	204.045	123.354	279.209	72.18	128.158	278.533	83.795	471.014	673.513	494.344	557.004	522.193	263.359	281.652	357.936
707	336.701	549.739	265.817	391.631	214.645	166.66	337.188	241.41	538.405	289.851	279.699	548.001	261.507	166.748	371.319	497.793	151.952	125.117	292.549	164.846	411.04	435.907	178.68	42.9917	388.033	306.375	264.344	685.095	723.211	568.506	761.568	120.482	139.08	505.09	306.226	179.906	460.625	230.698	388.881	404.987	384.748	439.006	633.737	354.098	864.017	642.492	651.415	552.33	272.032
708	149.159	150.93	49.0737	217.191	176.512	377.794	165.519	572.734	945.196	558.371	471.858	386.572	84.1975	410.741	461.024	237.628	220.244	500.066	305.541	486.421	615.304	321.985	454.709	128.574	668.891	70.37	217.32	484.939	420.012	703.499	857.124	192.329	268.12	440.46	70.1175	217.55	332.392	326.274	253.39	65.3625	107.43	149.009	607.344	424.973	324.228	333.094	540.544	129.607	50.4387
709	352.443	404.746	377.401	573.554	146.454	177.504	213.466	336.993	140.482	304.74	236.513	430.074	258.025	275.918	343.25	200.404	138.853	163.537	173.113	102.674	307.488	476.572	141.613	58.6676	485.176	158.547	155.668	489.543	238.666	298.226	396.006	42.7956	81.9	381.229	163.625	104.59	175.229	96.6691	227.201	259.018	292.407	347.094	393.424	145.119	739.785	227.132	325.64	304.713	72.0824
710	170.19	177.218	42.7813	80.92	181.851	173.827	82.115	201.994	162.656	249.455	544.895	178.976	233.863	109.894	216.514	51.65	117.264	186.975	200.577	270.455	111.544	207.136	174.928	58.4387	278.589	180.998	157.588	282.716	193.688	241.389	247.848	273.609	222.037	382.678	156.07	386.149	187.213	173.099	271.08	320.384	155.016	595.299	450.228	535.496	519.925	829.727	442.52	562.904	191.859
711	196.56	369.921	79.5375	69.6775	246.731	93.0313	173.061	115.196	293.233	298.815	736.039	254.241	237.416	184.866	231.848	108.927	70.3637	81.9725	104.043	167.227	206.934	343.064	244.686	42.7163	345.86	306.634	321.375	652.894	842.89	956.986	411.366	184.714	207.327	425.504	180.558	177.173	328.789	233.546	300.135	161.93	69.4587	214.298	120.379	150.14	683.075	245.796	329.615	444.721	117.718
712	206.944	186.374	154.167	251.838	87.82	85.1188	143.781	107.851	197.711	171.88	124.656	251.21	128.601	130.919	203.905	132.533	99.6625	74.5863	144.18	54.2287	251.042	261.919	71.0687	42.7025	269.63	132.989	123.775	343.059	418.109	266.845	349.276	57.5613	63.1925	256.446	160.699	67.3388	354.144	83.9762	152.45	161.725	157.75	189.113	218.225	173.481	369.286	208.156	219.53	222.799	105.476
713	180.201	117.65	102.41	342.866	119.456	60.9575	114.923	99.2625	371.859	118.52	81.0187	289.361	192.058	208.749	151.144	175.379	153.175	70.6725	128.441	62.47	202.94	200.084	79.8225	49.86	154.615	148.975	194.536	374.058	332.316	287.131	371.723	42.6987	73.7113	238.716	134.159	117.949	310.781	92.6625	126.846	129.183	95.61	148.336	64.03	98.0812	242.484	151.471	129.999	109.27	105.645
714	222.229	207.08	54.3963	117.916	84.6525	62.1962	204.041	219.291	180.708	197.051	330.613	247.969	206.304	132.783	185.708	68.2963	133.771	179.381	135.624	161.664	298.935	301.441	85.7662	42.695	251.732	186.02	180.963	347.1	532.111	444.098	471.27	237.775	211.314	294.228	206.155	127.983	333.011	129.268	123.566	202.55	124.694	394.33	460.375	418.364	521.694	474.082	272.004	274.331	259.149
715	79.2679	79.6286	61.3179	71.1286	130.917	106.762	63.7095	135.911	99.6571	124.665	268.218	144.827	150.482	118.633	191.223	50.3048	84.1476	79.2905	50.2524	129.371	104.01	151.374	1142.32	42.5155	223.623	48.9798	59.6631	146.673	63.5167	141.663	152.165	97.2095	93.9631	207.937	69.3238	130.629	66.4381	147.08	130.601	121.073	61.8833	277.457	303.742	235.785	266.733	479.929	373.12	131.606	96.969
716	226.523	344.169	42.4162	165.465	392.673	257.576	331.614	456.275	1098.58	330.745	1056.99	383.185	416.632	293.954	543.674	918.015	324.175	337.67	605.771	395.353	754.274	387.19	333.084	114.302	1078.4	581.977	224.234	1117.16	458.871	562.944	452.99	443.754	636.039	1293.07	594.981	892.784	284.261	1262.2	347.058	539.469	267.514	882.996	899.173	1370.11	1330.65	2246.16	2862.22	519.906	264.715
717	220.564	201.139	189.175	145.315	80.6188	65.845	174.148	110.774	80.8563	73.7938	279.601	187.48	170.465	133.875	134.574	51.9125	119.986	146.151	102.13	70.8912	217.244	267.285	55.3725	53.0012	193.324	131.901	100.073	181.905	312.197	275.507	243.156	168.144	122.184	229.07	151.795	88.905	200.072	60.67	42.41	162.15	89.6675	205.959	240.755	344.887	307.967	327.785	204.572	117.444	88.855
718	186.778	217.226	169.406	170.898	130.306	117.13	146.356	148.176	153.511	254.704	418.851	203.338	107.433	104.08	266.065	76.18	50.205	42.355	87.8125	140.799	218.857	228.756	125.78	50.29	221.085	127.506	138.077	284.691	528.22	317.918	408.636	150.903	190.473	286.469	136.741	69.5362	398.43	85.9	107.825	61.7975	59.9225	157.304	165.625	158.903	343.228	165.12	320.324	336.93	97.3675
719	188.175	235.511	113.535	271.026	100.395	77.8025	134.384	155.401	160.59	198.118	136.841	240.454	108.96	139.447	276.149	141.781	46.7488	70.1737	134.998	60.5075	210.768	289.753	81.4587	42.3513	215.056	96.7625	77.5138	247.531	327.764	192.632	256.934	52.1825	57.57	195.365	111.761	50.3038	317.884	55.5812	179.041	140.968	141.11	172.889	246.869	131.349	414.272	185.61	221.843	200.861	138.834
720	232.42	222.765	101.025	171.82	126.354	109.694	249.176	198.118	212.134	188.655	686.987	355.818	255.688	161.254	218.334	94.465	194.463	169.57	150.664	153.075	211.371	369.163	88.3137	42.3312	144.278	138.986	133.324	301.673	324.049	349.433	299.471	168.301	112.325	214.144	145.305	117.613	133.265	75.7638	131.792	348.007	142.654	398.783	175.357	223.518	470.864	232.72	285.49	144.903	311.245
721	211.04	310.118	126.626	179.558	77.4333	82.8631	146.998	184.427	202.314	246.245	146.148	309.754	119.455	142.925	160.857	134.395	112.035	170.314	138.119	90.9917	237.829	342.929	75.6857	122.508	390.275	174.502	143.942	497.47	415.5	269.91	313.037	74.1345	42.2952	316.99	188.936	95.1881	310.958	104.54	89.5929	154.732	118.075	181.821	285.185	169.848	401.049	141.84	179.142	222.819	53.4964
722	254.054	315.438	193.246	230.348	145.751	89.0463	259.544	196.965	287.309	196.191	619.737	374.319	261.215	156.76	174.481	93.3787	210.126	154.348	225.281	142.053	282.068	295.386	124.598	42.2738	271.696	234.644	188.546	340.962	538.193	587.07	305.19	205.82	230.243	282.78	245.651	144.359	352.577	111.636	110.915	376.038	125.149	368.69	571.234	618.966	481.394	636.997	324.462	244.78	219.356
723	97.1825	96.145	62.0487	71.9813	97.8738	63.4012	57.0288	112.419	159.006	103.824	182.908	73.97	124.396	128.466	163.48	84.2288	70.72	59.9537	85.8175	84.3312	98.3462	157.586	220.808	47.9188	127.241	56.2013	43.3762	127.225	126.909	139.344	163.655	81.1412	66.8025	113.138	77.1875	158.813	69.0487	98.54	128.885	149.059	42.2587	145.514	160.702	212.651	198.982	252.568	267.738	115.355	77.7525
724	312.063	434.406	42.2125	148.659	229.191	180.884	298.934	230.216	454.119	336.381	724.9	300.913	299.394	339.188	479.106	539.15	223.109	286.313	208.816	280.563	1221.47	437.988	511.413	112.069	891.331	146.738	302.853	543.097	549.984	439.084	722.622	295.425	511.747	937.669	358.95	635.688	330.272	303.663	422.025	430.281	282.688	527.666	217.672	894.112	771.388	772.35	2003.53	139.397	115.759
725	123.206	182.814	177.296	281.079	112.168	111.223	163.601	161.313	386.145	212.621	154.779	333.581	117.013	117.46	116.381	116.444	56.585	74.5313	151.061	79.6137	168.524	188.585	70.5225	42.125	188.83	98.3637	87.7525	257.988	242.385	216.688	242.455	48.0725	45.9387	199.515	104.67	64.6637	302.131	49.515	78.8075	156.072	102.756	171.376	138.262	74.3375	292.124	164.971	131.523	248.14	73.8937
726	202.236	242.391	209.949	136.409	163.077	113.248	152.76	146.167	208.886	172.871	134.229	115.605	280.566	154.29	297.06	146.993	86.3775	72.4638	167.863	114.278	142.625	184.464	77.49	42.0613	307.681	163.824	187.175	385.284	511.965	227.318	415.155	220.081	44.9475	207.984	309.971	112.155	462.015	152.676	142.202	416.47	321.484	168.931	254.78	276.829	285.313	653.671	463.644	252.97	145.438
727	160.15	197.559	72.2675	50.065	232.665	201.213	142.689	126.108	242.596	227.384	582.686	217.06	174.719	112.984	228.183	42.055	99.9862	108.216	213.493	274.257	108.584	112.828	235.816	65.5763	182.292	117.405	94.8512	247.713	103.101	230.216	187.311	109.723	178.91	203.973	71.185	168.28	297.342	177.468	164.454	162.13	84.3625	270.974	294.623	293.791	277.701	728.481	788.376	228.694	124.016
728	200.445	226.043	176.471	183.19	174.408	149.512	207.662	291.396	151.386	403.181	779.64	255.225	190.558	164.632	324.638	118.871	41.7286	64.3321	99.7631	216.039	345.618	508.996	110.427	76.019	241.705	165.031	200.785	303.551	642.281	424.289	458.358	162.912	230.829	255.92	163.681	134.606	548.915	147.454	165.237	214.789	79.6238	216.867	565.418	390.635	687.313	453.952	589.567	474.6	301.811
729	149.416	239.061	108.774	105.879	209.919	103.56	251.939	240.981	82.355	301.723	867.553	226.269	243.004	167.859	322.092	87.8413	51.5225	51.3912	103.296	197.273	215.262	326.246	137.26	41.6713	232.079	301.004	233.291	358.75	492.351	330.3	438.712	202.964	203.58	339.88	185.106	166.917	411.462	219.53	176.224	319.205	106.304	223.005	474.946	452.103	613.496	604.531	684.197	449.738	318.378
730	261.881	282.488	179.026	98.265	127.215	129.066	239.311	161.415	303.041	229.1	802.205	318.724	176.095	109.886	148.7	71.9213	120.446	145.615	148.03	142.229	285.154	330.217	72.2262	41.6675	202.012	171.139	155.123	375.764	466.345	428.957	332.661	207.366	185.628	292.165	155.571	108.838	423.322	93.525	72.395	217.393	88.4725	300.647	412.901	484.754	439.577	466.44	329.446	185.471	170.908
731	444.795	519.499	251.819	555.07	189.354	80.7463	377.584	129.412	594.296	180.098	402.826	723.197	406.896	271.209	509.576	892.016	70.62	56.8413	303.805	65.7438	673.809	442.854	115.831	41.4213	663.925	584.329	499.181	1481.05	1307.25	670.504	1052.67	174.079	306.291	698.825	367.873	381.565	429.696	465.538	433.185	852.758	514.11	323.25	561.204	596.393	1026.7	686.111	944.156	460.145	259.515
732	205.26	229.941	70.74	128.072	91.765	101.853	123.931	112.61	224.162	189.94	403.24	286.946	141.005	112.693	133.137	103.995	113.689	187.59	99.2763	177.915	213.626	269.443	58.6775	41.4138	143.681	90.35	100.274	146.409	120.804	172.37	138.97	50.3338	53.095	107.868	100.254	74.1825	85.2412	56.7963	95.8962	184.841	53.52	300.849	340.976	335.361	296.392	318.296	147.85	200.985	185.936
733	221.232	198.351	54.9537	98.0275	185.868	167.56	209.384	244.791	541.24	246.32	303.701	254.83	302.759	209.966	309.378	163.908	137.227	164.109	236.334	220.191	299.575	218.825	267.39	41.385	391.209	139.873	143.625	372.389	283.767	450.774	316.034	161.223	250.748	321.454	148.361	408.77	158.968	414.046	223.766	239.348	80.3187	333.42	121.238	349.331	473.103	498.21	1218.94	151.173	64.4463
734	273.67	264.426	165.748	153.876	96.5125	50.2938	438.601	200.283	154.396	116.116	399.161	227.441	205.363	211.042	417.762	48.3	140.111	173.149	133.824	133.775	801.294	239.815	51.665	41.2025	216.526	226.07	440.234	198.843	640.179	407.033	730.411	352.751	169.861	310.015	194.254	179.31	222.257	442.501	73.87	312.286	99.0325	415.696	453.035	575.546	521.554	1247.27	976.979	228.666	204.135
735	82.6381	175.354	84.1607	183.188	56.9357	55.8655	109.548	105.238	191.517	174.662	69.4583	206.217	75.5679	91.7071	103.635	81.8893	63.7214	48.9202	76.9357	48.8167	102.526	158.955	58.9667	41.1821	167.611	76.5571	98.9024	190.694	259.223	243.742	200.301	43.8143	52.081	197.914	108.661	53.3714	287.819	55.2905	120.275	83.0917	88.7893	144.375	203.767	189.435	343.246	143.871	258.808	215.681	123.225
736	89.4925	133.409	61.45	43.2025	166.357	140.075	100.921	223.429	238.32	246.899	371.369	270.97	157.628	190.357	177.816	93.0575	95.9188	102.805	171.324	239.671	77.9338	158.406	176.239	41.1463	275.313	97.1975	66.2438	168.914	171.466	190.202	329.196	186.791	125.069	202.731	126.132	161.602	199.066	211.881	163.447	160.202	85.19	296.411	469.346	330.929	313.056	446.875	530.918	240.02	80.96
737	145.355	361.605	75.3266	205.698	48.6719	78.8078	46.3109	137.914	141.836	117.756	75.3844	387.206	87.2594	110.438	158.992	43.3359	71.1813	56.7734	67.0828	52.6844	154.217	259.064	46.4813	44.6484	111.416	65.9047	82.5641	246.255	167.548	205.472	331.341	50.3422	41.1297	234.72	71.5812	65.5891	87.5563	50.5016	325.975	169.97	127.166	288.458	465.566	161.05	655.244	237.255	263.923	378.386	312.494
738	124.055	150.805	80.695	69.9675	170.47	140.905	123.658	257.098	96.5512	185.738	209.646	128.754	222.977	175.183	206.826	96.94	97.8175	123	160.238	172.24	244.065	214.149	123.666	41.1225	227.281	60.2575	51.665	198.956	152.048	150.019	168.085	95.0837	87.0588	269.142	79.0613	148.229	138.64	114.826	113.716	118.974	62.7463	274.869	304.886	445.511	275.976	421.64	467.123	200.059	70.2963
739	291.917	1481.29	99.069	392.792	140.115	360.569	168.055	492.698	122.868	613.742	304.908	2159.28	210.314	420.492	107.11	43.1381	155.424	188.623	85.5548	551.595	249.69	799.724	74.3476	57.7298	179.869	173.488	391.085	225.239	601.219	486.87	354.765	360.643	450.135	220.686	371.562	142.82	40.8179	179.773	447.756	362.756	209.996	866.975	2744.74	599.024	998.954	652.698	488.751	786.493	1125.52
740	215.851	517.241	107.388	174.018	104.272	40.7471	153.713	151.809	412.741	278.385	661.144	844.291	161.424	202.422	156.521	375.974	96.8015	171.259	198.381	173.035	235.797	364.828	98.875	54.4618	213.604	230.643	255.847	341.669	291.866	338.709	300.985	207.782	141.929	178.576	227.213	191.547	155.093	198.507	186.463	383.206	178.45	387.171	1023.76	496.621	763.975	781.794	518.681	354.537	318.281
741	222.129	218.514	405.382	404.436	132.69	87.2225	189.761	123.173	274.358	186.719	140.429	372.276	192.004	175.819	276.306	170.925	74.9775	71.8337	151.711	48.035	244.667	298.071	56.7125	40.6475	257.137	200.445	173.963	428.08	505.6	391.715	419.249	53.0938	100.354	380.705	181.996	115.28	395.951	107.806	291.113	286.28	216.896	273.04	285.83	263.688	582.808	296.535	344.905	280.861	224.224
742	178.785	180.824	303.055	249.13	157.968	102.189	185.839	145.904	134.343	104.374	111.915	643.617	222.285	187.66	274.624	165.704	89.6012	63.0538	127.5	73.745	200.811	206.295	89.9313	40.64	240.699	101.698	120.614	267.313	296.589	244.055	470.2	74.8487	65.7938	296.376	108.111	76.54	267.003	75.2825	139.818	172.868	116.98	268.43	250.489	182.886	450.979	241.486	216.882	256.967	134.505
743	552.337	601.841	497.183	772.472	230.648	143.739	216.779	355.683	389.774	218.326	142.464	411.394	296.892	366.179	577.528	554.04	202.132	98.8875	249.474	73.3863	402.93	631.431	186.298	40.6275	430.821	261.226	239.018	663.076	635.604	439.336	682.86	46.415	132.602	356.262	180.884	122.629	498.235	97.55	580.449	517.395	347.799	399.72	552.688	156.988	857.279	367.836	451.854	307.152	295.517
744	198.785	206.294	136.149	254.084	104.338	79.3738	129.835	139.778	261.582	174.21	135.048	261.269	110.551	105.365	200.255	150.01	59.9888	60.6512	134.641	63.2713	197.169	274.966	58.495	40.53	266.038	105.089	109.251	344.79	388.724	300.705	346.566	57.9525	56.66	257.706	127.679	66.0062	382.119	69	203.664	176.064	138.965	213.755	249.779	206.357	455.027	232.506	260.78	207.089	184.484
745	118.151	154.05	59.5025	40.4562	181.47	71.44	103.882	99.6063	104.016	353.72	643.635	215.482	108.897	60.9475	113.575	57.225	66.0487	67.9463	57.67	124.771	134.711	256.837	295.096	51.8612	233.287	205.139	205.659	545.518	768.021	426.635	402.723	285.788	173.926	388.049	202.949	167.52	481.959	181.044	200.534	44.38	94.745	179.719	102.566	296.382	595.242	211.107	194.334	200.504	152.179
746	102.524	278.571	85.6512	57.9179	122.133	99.2298	84.8429	114.704	144.594	361.729	553.683	165.781	148.318	95.9107	106.956	54.8774	54.5631	49.4095	59.3345	157.48	235.221	226.35	44.5845	42.7155	173.636	133.743	211.431	269.17	595.902	434.119	321.39	213.744	145.579	281.775	98.7345	130.145	503.868	138.587	170.554	163.465	71.5774	193.646	398.035	376.071	465.495	261.663	503.327	497.989	157.135
747	115.791	319.466	80.5025	89.2062	266.811	118.376	143.874	71.4325	196.607	448.459	902.259	354.426	264.404	181.381	123.208	142.725	124.106	76.9225	110.62	203.459	326.226	332.822	306.905	113.586	267.364	418.601	362.976	534.529	1006.41	704.57	468.459	328.993	207.59	394.238	236.266	257.541	294.535	348.514	350.449	99.8888	40.3638	225.458	217.595	677.729	744.371	221.089	680.056	693.839	176.53
748	307.632	334.425	40.3625	156.865	50.16	74.2625	213.085	136.059	219.136	233.25	542.239	454.305	128.613	96.2125	86.0537	73.2488	234.143	199.839	124.397	107.003	386.128	417.199	77.9638	45.9087	156.96	148.218	228.313	410.475	521.874	683.34	341.827	297.695	486.671	322.449	310.009	162.13	390.41	120.645	137.988	275.52	169.511	244.88	713.497	774.014	645.633	647.112	412.015	283.569	423.855
749	94.3775	303.51	40.3375	67.8312	69.725	80.225	147.44	84.6162	139.463	346.082	320.309	245.218	205.27	203.813	163.72	273.22	90.13	91.305	85.2425	165.92	192.24	270.56	260.954	78.4387	223.55	241.83	286.875	360.226	440.322	562.386	311.689	187.491	186.898	182.613	177.391	152.96	200.757	182.6	274.761	202.25	71.71	173.727	477.483	388.689	778.499	387.944	318.717	314.96	258.256
750	239.327	297.605	378.729	334.303	143	89.2237	210.348	123.23	428.414	213.374	180.645	326.859	164.319	154.379	218.894	151.683	70.5625	77.795	151.501	76.4988	249.65	304.103	62.9862	40.1488	277.581	161.933	151.713	361.804	611.477	373.845	455.943	59.8912	81.7738	331.891	150.336	93.1025	562.768	98.5375	237.396	189.224	198.406	222.319	330.579	264.16	522.146	228.809	314.952	284.82	173.56
751	77.5675	188.851	82.8512	111.328	149.701	213.818	147.004	117.499	292.733	511.606	874.747	742.107	191.07	69.315	199.041	40.1163	127.221	173.586	267.386	177.716	114.666	89.15	131.589	42.1337	276.825	118.155	140.955	627.433	453.563	198.765	652.459	430.27	664.401	1006.89	223.165	470.976	193.343	361.476	299.827	318.108	599.255	1344.74	618.675	1554.57	1111.79	807.805	1280.59	639.416	542.668
752	146.484	225.97	366.319	365	81.7025	88.825	267.109	191.036	175.649	153.416	61.5337	269.056	123.325	120.243	217.283	139.023	51.5938	57.7587	144.606	50.29	192.357	201.989	41.8338	39.9988	214.618	182.564	226.731	385.636	528.736	451.156	509.084	57.285	104.706	350.318	113.021	120.341	538.865	65.77	217.374	178.577	197.404	139.279	378.661	219.822	516.315	182.235	276.919	433.809	164.254
753	269.721	323.402	225.73	283.521	161.054	125.686	232.859	188.852	420.314	211.182	184.236	350.925	168.67	131.762	265.084	154.521	70.6893	62.7893	172.082	77.2643	263.034	286.132	80.3893	39.8393	357.816	245.539	207.68	444.98	810.864	446.436	583.886	95.8821	113.752	494.286	177.607	137.055	876.752	140.175	307.23	267.075	247.38	329.811	414.443	377.575	599.212	372.688	437.255	398.555	208.643
754	186.359	282.15	39.8075	99.1325	184.509	75.5062	175.421	119.111	65.4262	457.071	747.729	237.956	218.93	163.27	260.132	124.896	80.2537	89.7075	102.113	147.859	507.668	554.143	180.239	48.6875	195.417	238.22	279.159	260.244	436.351	878.501	602.513	308.533	183.208	244.988	249.528	262.663	122.438	240.988	285.291	330.759	105.905	198.339	634.925	498.75	917.966	530.131	323.461	327.23	301.05
755	162.329	176.43	152.639	145.438	148.141	128.749	110.31	159.074	142.898	168.153	301.113	115.588	143.301	67.7113	179.16	80.8688	45.405	39.7825	89.7562	133.558	164.546	229.549	83.6838	45.3387	210.055	143.836	131.855	246.934	490.743	351.32	401.611	151.656	196.018	261.753	113.905	98.0713	518.992	89.8662	114.365	128.59	52.3075	122.573	345.929	255.988	401.262	304.2	431.966	397.994	118.206
756	68.94	131.246	39.7362	67.8662	166.044	117.439	172.8	124.936	498.699	254.969	601.309	260.538	167.941	81.1063	248.724	217.59	68.755	78.4525	217.643	166.158	166.995	82.7763	185.13	61.4213	275.233	118.294	127.358	291.163	166.311	309.777	214.036	183.549	345.618	369.174	170.479	360.106	201.124	398.193	146.301	215.174	108.411	264.721	535.072	706.205	481.331	884.759	890.472	339.08	106.221
757	175.271	308.101	66.5775	158.857	263.519	289.4	160.553	517.104	292.212	400.775	515.957	535	248.956	320.036	490.039	343.486	155.399	266.091	147.846	273.595	150.729	271.934	555.886	117.983	410.581	112.966	142.989	219.79	233.396	523.756	437.896	259.548	230.702	243.869	285.775	418.626	79.9575	429.868	275.664	220.965	163.023	388.279	229.046	396.844	662.376	475.456	471.892	232.628	136.19
758	205.723	324.111	174.798	145.824	78.7875	97.395	172.26	187.649	128.159	217.489	391.611	758.97	163.934	154.102	162.234	68.3113	165	123.49	88.9425	120.353	212.206	358.069	56.1213	39.6675	164.569	103.001	125.195	186.066	337.906	270.49	353.193	220.833	145.19	228.42	156.604	84.8125	107.149	55.2537	133.947	192.486	68.445	374.024	858.646	370.205	660.617	356.943	201.109	262	263.188
759	97.9952	248.17	51.181	128.258	193.254	155.007	88.7155	112.696	243.613	233.194	283.86	244.907	98.9786	66.8631	125.25	157.142	39.5357	94.4	131.193	213.94	105.139	83.2429	287.396	120.055	107.54	75.3095	91.2833	101.29	128.22	251.293	350.449	150.588	104.34	266.364	129.692	273.348	140.086	141.549	144.154	115.814	109.295	924.567	449.954	451.048	604.351	555.617	1097.08	874.062	163.325
760	436.599	734.717	270.279	504.4	191.488	129.408	362.315	239.26	644.58	408.933	198.993	549.056	240.681	257.728	337.571	176.609	203.001	164.146	264.543	109.007	341.113	758.386	88.2113	39.5238	418.855	265.3	353.166	470.471	907.28	754.658	962.239	195.755	147.639	388.209	417.231	230.61	534.905	111.149	219.094	350.561	269.082	306.155	700.389	227.064	706.45	323.07	320.647	641.94	245.14
761	166.588	174.679	77.2837	121.956	138.371	138.405	101.484	129.766	116.118	279.474	511.555	180.079	174.535	157.835	171.679	126.013	43.9063	43.3625	95.9038	167.065	259.603	338.527	72.7913	39.485	202.52	133.708	148.419	234.09	451.342	311.685	356.723	153.411	117.266	188.607	122.254	96.7387	323.592	92.4275	211.563	168.521	71.6838	265.059	597.066	479.78	754.544	426.275	607.717	540.405	277.831
762	287.032	439.233	147.288	283.103	151.212	128.628	270.412	248.288	692.714	415.671	1165.21	503.868	140.962	191.08	228.095	146.73	194.684	204.792	233.068	236.705	230.387	360.482	146.529	39.4461	315.234	279.839	266.316	476.471	952.734	892.822	604.732	284.421	332.732	300.505	366.995	193.439	869.279	175.082	114.242	374.084	143.329	655.771	1005.41	1045.31	822.404	893.132	389.736	470.768	341.537
763	212.398	212.915	101.618	246.889	115.195	47.8162	255.166	90.2788	385.642	141.07	126.785	281.501	131.768	86.9175	278.156	259.658	89.59	65.5738	181.921	48.6488	421.918	235.629	242.011	39.4288	267.551	357.84	269.757	450.973	623.79	556.231	386.721	79.8012	89.27	265.363	231.48	113.47	390.821	138.685	214.56	191.489	522.013	225.268	305.921	339.54	515.591	442.531	447.538	341.389	126.834
764	630.964	589.793	606.555	459.139	116.406	80.63	301.803	194.796	315.945	367.348	743.986	577.856	399.531	132.506	454.783	41.7	406.006	166.447	128.006	142.024	728.871	779.731	43.1313	39.395	262.599	292.351	426.285	599.296	909.732	1029.18	1182.28	741.361	779.857	610.03	727.138	334.401	326.215	305.294	164.801	454.146	365.841	691.673	413.908	1271.41	1357.82	1359.6	410.723	669.25	897.901
765	389.765	1779.99	164.732	723.401	361.313	1386.82	154.055	1781.32	380.598	2514.77	333.179	3321.15	494.248	1491.05	543.47	314.353	111.71	258.267	125.09	1560.55	185.098	1392.77	93.2837	140.63	187.595	105.716	236.521	215.501	281.86	393.584	566.896	306.003	264.904	167.891	287.451	110.498	180.729	220.481	1109.59	39.3813	84.9938	449.395	1550.91	275.652	749.408	288.4	182.135	328.368	322.629
766	179.646	259.075	69.8479	125.183	68.1813	105.346	216.41	322.863	283.123	202.554	234.037	231.412	173.098	200.092	342.185	218.917	81.4604	139.181	100.985	186.398	396.11	328.438	145.515	39.3563	264.79	75.0875	92.4729	235.406	168.796	272.425	336.363	87.7771	111.704	280.723	137.942	216.044	125.844	315.31	221.846	165.738	44.7354	307.683	735.144	892.894	570.075	799.648	945.546	352.119	121.313
767	259.861	224.58	39.3375	59.6107	223.027	110.85	199.65	145.796	575.868	215.361	640.121	216.416	389.284	203.027	310.639	111.529	298.637	134.298	201.588	222.757	210.425	281.077	175.905	77.1643	500.996	220.18	268.416	439.35	350.589	481.952	372.568	367.866	426.593	407.03	268.423	349.538	308.234	386.262	300.677	537.268	218.404	443.064	643.446	851.125	437.83	1266.36	1544.21	319.346	269.218
768	168.877	145.312	95.7238	130.092	117.923	96.5667	176.215	125.399	199.571	96.7631	378.451	232.908	158.114	90.9857	82.4929	79.6274	148.724	100.704	92.2845	119.83	173.844	150.171	76.9821	39.1643	161.988	122.763	99.4167	173.971	282.744	225.257	240.357	137.112	108.804	184.426	105.473	71.9238	155.895	60.1429	58.5357	169.167	49.5845	188.45	199.398	298.09	233.986	305.289	162.983	107.805	60.675
769	280.801	772.168	394.464	96.2275	397.404	122.879	165.985	210.628	251.878	315.457	737.114	317.378	708.709	129.884	637.205	39.1525	447.43	101.598	155.231	219.878	150.734	764.496	103.194	43.0288	111.014	374.505	365.27	516.151	1353.09	992.745	1392.89	1141.57	89.6925	795.584	348.369	256.73	119.696	180.868	532.401	659.013	235.79	206.145	536.982	527.362	1167.96	825.151	387.452	960.891	444.989
770	166.826	150.324	485.503	505.425	132.882	54.4225	149.455	132.581	257.345	213.64	169.369	839.266	161.441	91.6063	284.075	139.634	80.3275	68.0888	80.97	57.8088	307.152	298.23	108.749	39.1088	341.406	236.653	222.591	235.549	406.799	331.614	1060.13	92.395	211.255	312.634	233.769	133.843	368.829	131.931	200.611	174.269	334.19	231.287	367.784	195.171	1301.63	369.277	877.56	668.778	130.801
771	63.89	108.238	74.0812	271.757	120.791	64.2725	250.713	104.113	500.471	233.202	194.184	445.644	122.27	85.9275	176.173	123.823	74.8287	140.811	169.849	39.0225	210.976	163.1	100.73	125.97	133.132	111.66	184.215	427.526	544.126	420.78	502.373	95.9275	207.134	148.718	279.344	265.379	513.455	134.354	121.14	91.6238	249.464	170.365	782.846	266.808	703.278	330.459	565.524	665.99	234.159
772	137.949	183.511	99.4188	127.559	150.181	96.3462	147.25	186.005	68.5938	311.275	347.586	148.784	169.223	201.59	209.544	91.8438	50.8338	41.5562	59.355	143.354	205.039	347.046	90.5162	39.0037	280.147	119.373	148.865	257.794	370.889	233.949	331.935	144.109	160.94	223.215	125.933	92.5425	287.212	109.104	181.201	212.619	83.88	225.173	545.867	329.413	647.058	431.783	419.621	375.395	302.314
773	278.343	346.321	403.063	264.382	250.784	234.518	271.025	276.332	298.504	785.928	1068.9	476.143	196.906	219.738	342.884	110.238	67.8632	39.0015	132.763	303.19	363.756	604.225	154.512	57.8471	271.216	276.376	279.603	450.14	866.15	558.371	704.599	215.488	290.772	387.937	248.44	226.324	794.671	198.851	249.472	326.181	128.672	329.166	649.309	391.613	835.993	763.9	747.409	638.499	389.64
774	244.76	284.12	221.736	268.255	120.367	73.6774	335.168	286.73	405.624	341.883	549.682	398.35	231.433	259.471	199.931	86.8964	117.67	160.251	157.649	227.058	320.136	388.176	55.3821	38.9964	197.844	179.885	120.379	211.826	417.457	413.392	337.892	159.494	141.962	232.65	243.518	101.561	315.938	91.2036	99.4798	231.774	84.6905	474.565	508.292	486.058	400.914	621.961	205.745	187.605	264.688
775	147.529	159.664	43.5737	99.3512	218.393	188.991	114.071	174.14	175.667	328.244	570.415	347.035	121.603	159.319	247.072	113.536	87.2225	107.306	236.473	236.684	180.399	194.357	247.469	38.975	324.281	97.36	79.2313	359.315	218.259	227.989	348.658	230.341	225.94	316.209	235.411	297.761	228.843	304.78	217.135	180.982	112.824	339.85	661.264	427.355	427.668	685.793	696.3	350.053	169.646
776	507.908	434.87	169.512	499.863	751.831	958.119	595.206	867.14	1922.45	1318.28	1536.54	904.519	577.301	557.659	754.149	586.456	440.29	524.039	835.964	977.245	736.07	861.759	559.131	208.669	640.885	117.349	258.094	529.51	380.355	674.612	591.737	258.666	349.158	657.941	335.946	342.327	359.413	527.496	333.521	317.878	154.624	546.33	215.379	486.754	470.815	706.776	1118.5	115.564	122.671
777	238.512	227.579	157.068	141.684	105.725	106.07	162.31	190.984	99.0138	180.374	418.805	313.449	229.093	203.554	160.982	46.4838	101.941	133.294	104.47	166.563	214.898	398.176	60.04	38.89	280.017	108.961	134.05	234.065	481.806	335.522	419.024	190.39	177.458	293.011	185.452	87.3787	211.119	77.685	69.46	233.243	70.615	487.704	604.899	450.738	714.459	448.516	350.717	211.447	258.765
778	469.337	441.09	397.944	310.191	212.92	241.866	699.154	349.141	880.48	423.045	1038.05	625.188	225.444	156.803	211.923	128.205	105.86	117.368	221.941	266.964	510.061	492.649	38.8488	40.0887	269.364	328.124	284.128	495.604	1002.84	714.955	608.671	427.014	442.364	528.281	370.285	229.784	1076.05	226.589	107.294	127.095	91.6912	279.34	687.281	749.579	571.544	485.863	415.642	378.195	237.808
779	279.095	402.115	228.206	312.33	180.345	99.825	299.467	146.621	953.629	260.364	388.75	522.987	199.045	131.005	327.341	274.515	97.525	38.7938	214.607	92.795	526.097	264.253	102.276	47.88	443.533	538.487	262.809	832.699	888.029	442.44	564.109	145.256	194.155	419.681	409.39	288.369	516.715	322.288	241.4	478.933	316.411	245.248	395.916	598.414	554.789	515.409	790.075	399.151	172.511
780	459.433	300.875	177.373	230.004	526.685	142.364	421.443	198.056	1567.9	309.967	1979.23	384.055	303.261	328.525	1167.26	334.96	586.914	176.706	381.291	143.796	529.893	249.534	64.02	38.79	1194.83	597.214	315.734	989.319	551.754	949.813	1683.06	487.065	901.68	814.709	369.886	781.451	463.626	1432.88	251.44	1038.33	366.404	157.577	500.86	2036.44	428.84	1548.72	1843.47	134.61	174.398
781	102.661	148.226	38.7881	85.2155	138.929	127.077	97.1857	154.451	216.795	215.45	311.101	203.019	101.325	110.251	207.912	62.3679	125.298	126.048	110.281	164.852	77.3786	142.223	151.764	40.9524	178.99	130.254	122.336	198.842	223.931	241.581	405.199	203.875	198.494	283.643	181.306	250.727	84.9238	272.057	223.59	179	78.9405	170.857	386.092	381.937	360.346	375.91	455.351	276.877	114.154
782	123.705	131.22	131.241	137.244	139.471	117.863	147.926	140.456	92.1988	217.303	511.676	174.275	146.916	77.845	192.98	45.86	43.045	38.7137	72.495	161.474	181.167	257.934	62.305	43.6138	171.718	128.4	133.431	262.321	394.924	319.749	274.02	138.516	150.211	287.974	94.445	105.21	372.188	104.304	124.14	60.3975	77.62	217.054	73.0812	302.126	447.642	183.795	123.911	205.656	122.736
783	215.606	337.579	87.5438	174.004	293.241	310.375	202.029	299.118	219.944	466.623	904.616	543.464	365.006	297.515	455.228	133.604	207.16	129.07	302.785	357.376	234.715	264.631	400.007	38.6713	738.163	288.322	222.738	535.122	345.253	465.805	524.957	290.688	408.225	442.691	183.251	503.306	173.379	554.095	424.183	412.483	192.762	466.299	534.781	812.921	711.606	841.236	813.534	456.494	315.397
784	220.715	476.652	122.586	299.175	68.19	149.61	176.894	109.941	588.503	397.332	787.314	1125.74	153.003	250.475	136.835	94.07	382.848	310.206	122.27	133.542	249.439	272.289	113.718	55.1262	132.59	141.123	177.908	363.017	479.126	382.385	336.54	132.227	176.166	220.68	109.791	120.726	206.956	124.624	146.711	190.394	103.368	322.195	649.003	543.966	731.165	565.631	261.22	493.114	458.264
785	59.3062	209.335	54.775	62.3013	173.607	42.8575	162.751	63.8237	102.448	242.686	1079.01	104.399	193.053	67.0863	140.034	79.4313	82.8213	38.615	45.7475	91.16	250.741	209.241	99.0288	44.4913	220.565	292.71	286.051	480.079	678.884	623.265	299.358	284.548	221.898	297.712	191.843	315.375	325.283	294.454	116.063	191.831	70.4063	135.768	431.788	556.559	542.869	429.921	849.607	409.37	146.636
786	84.8488	71.056	41.8226	68.0631	99.494	91.7536	76.1012	113.668	128.229	117.132	170.006	90.3857	98.8905	88.8095	118.104	71.5988	63.5226	72.3429	95.4405	135.374	64.8107	111.198	79.4333	44.4619	139.413	70.4643	65.1833	123.352	126.829	137.424	132.974	70.5405	97.0917	179.77	80.9583	112.955	122.851	126.974	100.61	82.4179	53.5452	200.145	210.655	225.224	254.742	280.614	229.571	158.685	67.2464
787	186.836	658.721	343.645	530.952	126.463	155.55	38.5087	130.19	175.114	259.205	179.691	1240.09	234.761	243.322	268.52	183.769	130.264	64.5438	69.535	72.3312	146.162	413.296	294.359	104.91	293.725	386.701	176.931	464.315	443.806	199.689	709.975	113.25	69.295	267.659	230.641	134.637	354.769	141.285	776.824	768.256	382.375	556.689	1205.06	383.821	2065.55	520.52	435.815	909.264	590.413
788	107.734	303.621	73.7338	94.3675	115.158	271.076	186.631	118.246	552.51	345.01	724.826	430.225	121.75	157.749	233.411	54.3475	213.874	521.326	201.533	68.79	2293.78	357.954	58.8575	63.6275	386.899	96.9225	135.766	267.091	752.755	1466.14	324.155	198.015	43.1825	840.959	487.21	898.128	280.728	142.76	133.916	218.915	342.66	597.791	1682.61	282.504	254.544	556.02	436.118	490.223	168.452
789	93.1175	139.55	117.975	161.311	67.44	68.6363	63.8425	47.83	146.581	70.9338	74.4125	220.585	49.5513	38.2725	94.1287	76.98	51.7238	40.7425	86.6213	76.94	83.2925	142.435	137.515	64.83	128.257	172.636	105.954	217.091	275.954	219.583	375.421	48.8713	42.68	193.295	125.623	94.3475	259.707	43.9225	159.244	128.331	240.873	136.705	292.934	157.79	456.499	284.035	349.74	261.046	152.891
790	102.384	216.719	185.441	349.962	100.166	100.536	106.495	107.716	185.903	164.363	103.526	214.973	81.4188	107.713	218.917	89.8838	101.399	47.5975	81.7975	63.6275	118.945	197.018	43.805	38.6987	188.278	83.8975	98.9737	198.373	337.451	222.274	411.174	61.345	45.4562	153.105	94.5962	38.2013	367.934	57.5763	106.563	135.289	144.046	231.429	323.507	183.843	738.916	133.599	198.195	257.022	182.314
791	285.346	413.406	245.998	371.375	103.652	93.2881	64.5333	94.6119	156.821	279.251	186.963	400.885	156.742	155.321	393.414	100.17	38.1845	48.3595	86.4452	62.956	244.683	475.962	80.3821	76.7381	150.242	144.039	115.451	216.994	368.49	367.473	546.201	41.6321	39.4833	362.957	160.173	63.9179	284.814	78.4786	659.137	280.468	195.35	415.986	673.439	348.773	780.743	238.977	410.121	462.811	455.51
792	237.065	935.424	114.435	500.625	101.48	162.025	164.351	219.751	560.914	260.275	200.563	582.839	322.106	342.296	276.885	802.048	96.5787	132.718	185.535	152.982	472.826	552.026	67.4737	38.1262	410.506	261.496	217.434	740.938	660.886	398.745	449.154	107.033	146.481	288.37	339.217	184.148	340.939	260.7	350.298	202.06	186.571	384.175	676.643	307.462	841.5	495.044	669.071	581.327	238.518
793	146.685	291.385	116.391	113.736	132.421	60.715	241.499	164.949	170.656	216.44	648.839	398.641	119.266	61.6563	123.766	52.7525	140.385	144.48	83.5375	118.581	145.881	267.58	77.6125	38.1138	180.15	134.239	177.306	152.241	304.348	503.861	291.269	258.5	177.986	207.738	128.221	207.999	244.857	78.6713	83.7963	165.806	92.6887	346.946	512.456	363.641	514.974	473.558	296.11	373.18	305.48
794	210.111	396.095	129.784	351.188	160.042	38.085	330.693	84.3937	918.665	161.15	372.637	442.48	123.055	103.963	309.24	438.199	85.3225	122.03	324.332	80.34	1086.62	415.976	164.08	83.4737	641.337	572.148	438.495	967.61	1238.42	667.895	309.505	102.939	155.697	917.98	470.625	293.44	990.371	389.39	239.244	240.238	459.951	304.26	436.099	681.244	1151.68	496.215	1133.74	721.508	234.646
795	166.539	173.444	162.59	259.799	117.409	46.6538	141.148	143.179	302.647	98.79	209.158	221.536	166.542	105.755	213.871	87.9425	57.2388	37.99	147.029	38.9113	274.155	199.65	104.709	38.05	188.905	145.65	125.591	596.283	285.35	236.1	251.298	38.5012	97.65	360.004	125.784	97.9025	568.624	71.8475	239.806	290.439	236.451	219.806	175.936	252.613	607.997	237.193	491.77	215.919	180.504
796	256.296	251.55	194.738	171.329	86.155	76.2775	199.911	151.785	258.548	193.006	423.965	293.478	119.348	134.404	137.887	91.525	111.704	111.8	112.173	154.25	238.845	243.361	53.79	37.9663	130.724	117.476	115.813	219.51	396.784	329.275	234.195	136.754	147.786	144.711	140.655	73.8962	333.498	66.2188	64.88	138.088	52.3813	212.964	335.038	311.488	326.364	289.832	204.5	121.526	121.994
797	301.462	311.548	73.9887	143.074	121.19	76.4237	231.791	203.602	262.728	176.607	782.487	284.582	118.699	117.436	137.554	69.46	44.17	137.338	154.915	196.324	299.204	269.103	37.9188	45.5875	241.299	165.494	151.447	318.478	520.885	401.884	237.803	177.054	224.145	269.905	211.963	125.219	515.341	141.43	139.239	283.775	111.139	462.223	680.438	604.364	656.413	815.25	570.041	480.456	380.873
798	863.195	948.222	37.8363	508.414	740.791	689.727	750.77	1097.26	2322.88	1395.36	1792.93	656.254	1360.63	1019.53	1205.36	1165.53	1188.64	1798.79	1240.93	1164.45	1672.65	1135.58	1164.24	623.339	2025.04	603.054	681.346	1547.74	1069.57	968.734	498.115	753.554	975.393	1765	772.964	1307.06	982.034	1506.68	1013.78	932.701	539.173	1659.07	2059.1	2809.59	2286.79	2989.18	3263.65	1399.87	516.071
799	150.842	169.732	580.894	107.007	409.887	196.692	210.701	299.035	127.158	272.499	487.313	310.177	367.575	117.536	494.271	98.1012	312.021	37.819	181.183	193.685	73.55	328.463	77.3595	43.7619	136.036	120.286	167.863	207.619	313.399	427.215	1050.05	646.474	78.7833	410.595	244.874	194.532	174.208	94.95	228.743	354.837	188.245	345.356	139.108	260.177	465.91	603.976	354.66	190.15	199.352
800	312.806	413.578	614.135	369.504	173.094	63.4111	212.4	178.415	560.806	229.731	849.903	450.715	640.876	481.218	336.374	95.7806	336.718	493.411	201.9	75.9958	351.133	426.168	124.983	264.108	416.267	263.875	233.41	299.536	715.431	359.197	648.704	404.092	252.778	738.774	273.393	210.701	425.253	136.742	55.9792	351.36	214.217	207.929	129.075	128.012	338.899	37.7528	156.017	185.539	116.065
801	194.877	264.65	210.232	129.302	144.567	137.322	230.478	333.068	293.6	454.937	346.967	271.985	264.898	311.733	450.99	192.275	175.597	183.9	37.74	199.755	420.443	378.397	109.542	52.4367	531.937	78.02	141.603	313.017	80.185	305.577	426.427	333.942	388.243	563.095	260.803	253.683	99.0433	192.985	234.577	166.555	99.7	378.068	739.163	875.165	485.32	536.517	1032.87	386.578	113.887
802	709.096	475.935	182.126	206.113	118.215	40.844	378.996	113.375	440.636	213.756	1100.71	292.963	289.171	219.715	433.802	128.47	197.499	125.251	275.161	111.417	669.373	570.673	136.677	37.4619	573.142	502.43	438.654	524.423	1081.34	920.377	461.637	691.53	641.108	521.63	646.24	413.765	241.696	337.889	127.49	793.9	204.69	253.126	584.075	1021.98	821.76	1470.96	743.823	220.451	305.095
803	135.909	194.756	129.196	107.138	106.691	98.1625	122.484	166.464	78.965	298.03	438.37	178.068	152.38	145.221	167.535	79.5738	44.6362	48.3438	63.325	138.225	213.428	353.848	87.2313	37.3038	166.836	112.86	125.12	165.996	392.22	250.289	268.735	111.356	129.164	162.679	96.3012	65.6775	279.96	87.005	141.132	129.929	51.6725	209.671	370.647	286.483	570.716	337.849	423.774	355.049	225.86
804	166.295	100.356	51.0187	79.3937	138.294	104.45	69.05	110.479	191.976	165.374	267.259	186.387	137.181	104.705	165.438	123.793	120.94	50.1388	122.79	129.914	121.343	162.59	131.796	37.6662	228.106	53.95	92.5713	152.471	203.726	214.029	242.375	91.2763	107.754	99.6388	104.976	115.787	169.007	164.363	117.419	98.6525	37.3013	233.349	38.0812	163.709	247.344	408.116	325.848	116.956	58.3025
805	213.069	307.283	61.3088	150.798	102.208	59.2625	119.274	64.705	282.139	116.821	77.7913	259.276	105.279	88.8775	171.278	167.916	51.8875	64.3187	130.8	60.0737	213.92	248.7	53.9325	37.24	161.055	81.14	131.72	253.878	314.228	239.109	293.397	52.2888	56.6388	279.315	80.61	64.5913	269.966	71.3263	283.321	204.831	171.688	244.359	305.604	253.159	436.875	224.55	330.739	283.66	209
806	199.827	883.183	772.362	355.811	153.03	229.859	137.903	399.998	95.2013	542.784	394.318	1287.61	213.805	349.756	220.129	86.9663	222.709	116.693	99.435	362.065	110.599	491.402	73.6025	37.2362	144.322	147.662	229.931	179.53	308.844	366.01	1177.01	578.776	115.24	543.514	254.416	112.598	182.041	48.9913	616.959	254.261	235.49	1233.04	3636	606.943	1317.94	611.17	190.514	1770.18	1632.99
807	2368.96	4353.19	236.809	1155.2	551.673	779.569	2688.85	4045.67	742.836	5421.19	1100.66	2774.22	1294.12	1749.93	198.741	1186.3	37.1713	1993.04	237.903	1772.06	898.321	6852.75	119.059	449.154	765.104	95.6437	2466.25	832.546	1065.73	7608.72	253.449	1455.88	2246.95	1508.27	1951.14	1637.68	1641.74	168.889	1716.7	726.015	481.446	2863.73	5301.96	11020.1	2851.21	1005.79	3226.95	3497.47	3826.47
808	339.85	413.964	53.58	141.351	117.564	95.6825	219.055	220.909	249.946	240.278	788.6	508.78	206.56	107.639	174.344	39.9075	162.806	160.99	197.516	148.637	336.465	381.973	120.556	37.17	302.38	238.43	217.345	386.313	555.599	472.091	497.654	400.601	165.628	417.159	266.74	203.503	211.305	152.674	248.615	449.125	113.893	520.315	864.053	864.19	759.394	875.732	555.413	429.004	398.216
809	169.606	244.566	80.675	124.45	172.715	97.1488	114.019	136.602	70.11	316.217	360.169	235.985	131.546	85.7075	204.719	70.9963	50.345	48.4763	52.0063	143.493	249.908	390.329	70.2	37.09	145.563	150.934	133.778	198.659	348.207	417.869	253.848	139.531	129.79	186.556	115.286	114.763	189.57	110.969	225.186	164.548	48.6838	223.1	459.241	358.691	632.411	376.212	429.076	395.82	225.606
810	376.431	814.419	410.885	273.151	186.694	194.235	508.332	423.38	280.774	451.856	1349.61	915.219	401.499	243.714	375.947	152.333	158.079	112.665	251.874	417.669	332.754	790.449	78.75	37.0238	359.223	320.036	292.98	440.206	860.717	920.879	721.721	589.169	236.881	622.293	256.876	229.405	625.048	111.584	393.544	548.21	248.756	898.899	1242.57	1127	992.974	638.681	1143.97	940.491	1072.23
811	111.38	139.26	140.29	144.044	100.005	76.8125	150.756	111.173	285.642	120.221	63.5887	215.068	126.169	91.515	136.037	96.7588	67.0337	79.4938	157.754	66.9	148.485	129.132	43.2713	40.5388	125.031	99.025	79.8812	138.239	272.158	181.205	244.919	36.9763	42.9712	129.201	84.7963	41.3125	256.271	54.2725	103.341	96.705	92.6287	147.534	183.219	157.155	306.4	159.551	190.783	208.424	72.595
812	208.448	263.753	99.8417	82.84	151.02	246.075	88.2467	227.873	161.533	366.012	259.172	411.83	167.172	234.117	121.743	151.205	97.6933	103.538	98.0533	221.02	132.57	302.778	103.435	36.965	210.707	80.5517	117.55	189.825	179.478	120.108	280.462	199.59	120.643	243.445	83.53	116.433	108.772	100.22	264.42	157.355	101.538	667.298	563.907	297.855	744.912	392.08	390.805	567.632	170.712
813	158.136	196.498	152.95	96.0536	124.448	106.33	152.817	170.424	82.8298	262.442	415.986	152.821	143.894	114.926	200.501	65.475	60.4417	54.1012	68.2429	161.077	231.789	399.201	100.939	36.9321	133.45	94.356	122.042	200.044	294.545	234.444	264.571	113.287	96.3762	151.36	89.519	68.3738	262.986	54.0833	162.807	130.951	37.4143	240.446	327.836	159.731	449.196	310.437	325.82	319.35	189.627
814	161.225	151.212	254.095	120.989	128.527	124.762	118.944	172.527	66.2393	366.252	455.274	199.88	173.09	176.442	205.204	72.0155	70.775	36.9274	85.2262	121	217.261	402.777	150.445	40.8952	161.683	129.444	142.187	287.704	213.248	265.04	260.136	104.074	115.199	205.618	94.4988	86.3631	90.3631	83.5857	205.182	170.025	86.7226	243.58	411.093	238.945	486.245	459.932	395.223	296.775	233.873
815	185.98	144.19	101.026	113.919	113.571	52.4738	174.368	185.6	137.751	100.654	374.14	213.128	197.126	75.1437	147.591	65.71	91.5625	82.5588	148.145	130.31	170.778	197.474	56.3038	36.8963	115.268	160.59	120.504	235.566	388.678	304.89	272.999	136.713	131.865	219.449	176.468	93.695	58.6175	120.729	116.549	218.611	81.07	329.52	337.345	446.026	332.332	448.459	214.939	221.674	213.331
816	228.613	253.781	212.04	280.483	117.962	71.9702	204.4	156.752	373.675	217.24	186.94	279.798	136.77	125.443	190.394	153.219	72.6571	58.8345	155.186	98.6036	191.136	237.151	52.7214	36.806	248.696	159.214	139.663	355.367	590.054	317.164	430.805	73.644	90.0679	318.638	162.621	77.394	698.235	113.367	185.518	154.715	125.226	223.148	308.101	248.148	470.213	217.789	273.819	240.927	121.092
817	157.5	196.331	98.9537	100.198	111.435	79.3812	133.59	122.614	52.9813	240.382	409.123	149.792	116.306	100.938	204.529	43.2	36.7725	75.6213	41.375	92.8875	264.764	417.241	59.3425	47.1313	146.065	80.6175	93.485	157.723	263.077	189.743	178.879	83.5575	91.3625	104.897	92.0463	69.4525	214.66	75.1125	104.385	112.296	48.2375	174.178	332.003	229.231	417.316	292.256	328.706	264.034	175.701
818	254.708	547.669	158.435	233.408	185.379	102.988	290.645	172.596	355.124	245.057	1253.61	662.471	256.346	129.205	274.989	184.238	119.314	132.187	239.208	163.846	238.823	286.821	61.5262	36.6881	267.78	464.871	391.689	639.232	560.368	561.604	488.613	467.112	371.445	489.869	371.461	331.149	177.548	318.395	221.467	550.742	282.59	427.458	891.282	1005.26	858.517	1047.03	534.607	521.846	510.236
819	119.203	61.4913	149.308	113.976	150.003	164.866	73.3363	165.368	146.566	246.607	356.379	234.109	158.072	117.804	147.998	88.1375	140.144	94.6125	144.576	156.054	116.159	324.113	223.151	39.7825	227.969	50.06	71.1963	152.574	143.72	236.512	291.359	146.044	104.569	169.825	94.5037	196.495	73.67	142.655	184.204	124.763	70.9175	221.158	378.193	282.725	330.079	483.706	334.234	150.838	80.9063
820	342.124	248.162	190.656	175.943	148.693	123.195	365.179	340.505	498.016	333.424	659.584	376.178	166.481	137.838	204.509	47.615	179.443	194.239	242.778	279.423	319.471	313.827	108.54	69.8037	161.05	139.066	141.281	292.146	478.816	382.358	433.349	211.224	192.421	282.366	172.029	114.323	383.274	74.345	78.7412	206.998	81.66	378.983	235.581	269.031	374.776	320.404	156.118	163.925	207.706
821	98.59	300.81	41.7762	83.105	161.974	112.696	109.408	104.229	36.4725	329.59	539.048	217.261	248.727	149.194	94.2938	210.1	58.9775	113.581	69.1	239.618	213.334	297.418	163.266	80.8187	295.324	208.581	222.739	343.595	596.434	630.263	216.214	161.153	222.551	292.151	149.221	207.776	221.684	305.789	278.296	285.858	99.4912	239.681	784.994	617.467	955.646	561.155	735.55	611.337	347.504
822	560.584	4421.81	442.392	1325.39	340.535	452.806	143.924	1253.54	418.68	1770.68	167.861	3307.5	491.158	1399.63	420.63	295.068	36.3888	127.281	65.82	537.885	104.941	1850.44	91.4813	107.573	160.266	628.189	433.69	409.652	474.397	247.991	1185.03	229.525	58.98	801.95	356.512	134.855	285.663	78.5738	3413.27	705.996	816.195	1640.26	4695.22	672.516	2896.35	584.357	1323.55	2643.45	2140.92
823	171.89	388.92	101.439	130.185	153.884	100.014	186.571	176.845	225.621	229.601	649.716	508.923	118.019	102.052	126.918	59.9813	125.564	176.688	136.443	148.491	169.839	275.253	75.6388	36.3525	161.935	134.635	152.861	258.386	303.586	422.019	313.654	228.665	163.053	259.248	177.376	143.059	210.833	141.324	140.906	296.095	77.3337	328.988	397.339	624.851	526.689	563.935	468.574	377.832	335.2
824	177.472	269.938	87.18	75.0483	120.325	212.697	66.225	247.48	149.982	363.617	238.148	391.003	159.71	217.108	196.908	127.383	97.105	102.205	86.4867	207.372	85.9083	287.637	86.3017	36.2783	141.647	59.715	98.39	120.853	84.7833	118.128	246.56	177.102	115.665	203.825	76.0233	109.073	114.12	108.977	220.425	123.345	84.6383	600.745	549.97	203.397	727.915	355.502	351.078	457.442	183.847
825	196.299	416.339	144.887	141.34	273.113	232.305	222.31	256.384	111.823	613.135	923.734	481.46	282.391	222.696	351.996	39.7975	36.1875	85.1462	102.029	209.996	280.534	540.149	192.644	62.8888	325.531	275.734	330.209	350.024	824.673	674.786	642.674	229.339	262.424	351.569	235.713	178.893	662.77	175.183	490.009	320.098	149.884	628.445	825.16	596.419	1033.64	582.07	945.159	798.684	526.619
826	274.937	316.919	148.128	200.878	245.231	227.504	243.699	354.507	257.309	546.037	938.826	317.462	227.49	151.338	477.072	122.444	36.0985	76.425	127.891	273.343	372.194	603.279	156.978	57.5162	242.462	141.178	149.057	280.346	380.324	389.931	433.038	143.943	161.275	222.478	143.481	107.665	403.037	113.24	225.438	256.334	94.1485	370.384	602.019	499.013	744.653	587.69	597.371	527.893	404.626
827	430.36	449.652	252.41	665.602	228.197	127.896	220.186	240.776	526.889	157.544	143.001	459.939	357.983	339.345	333.536	110.86	183.975	85.6225	370.624	57.885	532.648	605.268	52.445	36.0913	503.396	788.528	497.283	1104.81	1574.05	1114.06	1667.5	143.542	259.651	587.71	907.479	324.469	183.65	454.255	406.118	624.316	501.941	549.17	978.602	324.793	1336.99	638.808	257.507	710.246	178.29
828	276.255	255.246	109.158	251.882	88.0869	103.329	257.976	450.269	438.019	284.832	371.942	460.536	67.3607	83.144	321.757	36.0798	198.05	275.91	245.144	164.746	556.645	251.162	195.202	37.5405	285.277	465.605	315.875	452.874	962.492	632.385	433.988	306.648	382.977	220.785	454.458	201.114	176.357	172.575	288.901	208.068	306.54	378.644	1064.63	820.185	978.145	1012.47	435.042	640.97	279.767
829	84.9887	89.125	156.174	158.141	147.083	100.616	145.525	291.85	139.732	142.738	236.075	145.785	135.954	95.1663	324.434	206.905	80.8225	75.6137	127.147	150.939	118.618	161.174	141.76	36.05	208.124	94.37	64.2575	140.915	174.77	154.287	237.934	185.08	125.681	203.334	115.27	192.055	145.868	163.563	144.575	163.25	135.468	227.534	381.228	394.548	269.223	575.111	660.028	276.696	107.131
830	1244.97	606.324	179.65	242.86	262.054	98.225	813.783	164.107	619.822	196.29	1935.1	909.521	266.262	195.43	372.293	113.901	263.951	131.821	293.105	135.713	1452.03	532.648	152.566	35.8225	486.901	350.003	363.151	1081.18	1096.99	1449.83	544.51	514.846	506.884	1083.65	481.479	796.47	620.979	396.767	140.849	926.107	415.571	562.596	941.799	2692.28	954.398	1968.6	3044.77	452.076	459.596
831	255.099	548.606	144.183	379.275	103.628	110.78	175.116	120.864	395.757	247.606	148.865	487.435	161.045	332.146	231.35	315.72	63.0375	115.218	162.129	135.618	196.284	396.6	55.545	65.4013	480.049	189.15	100.101	409.882	755.515	94.48	648.553	95.2975	188.129	403.527	332.279	135.856	366.464	73.4838	385.574	115.015	287.325	361.94	683.835	307.92	920.379	187.148	281.48	394.766	247.38
832	76.5075	185.531	60.58	84.6338	91.2212	125.318	69.7975	147.676	387.488	316.964	384.449	191.151	109.52	178.046	216.29	140.882	149.316	332.579	107.555	298.039	110.605	220.675	244.334	35.7525	323.525	65.9137	98.9988	172.859	121.389	129.145	390.341	251.183	173.433	189.265	189.109	201.514	38.1437	294.118	207.6	181.519	99.8775	285.404	627.601	531.888	549.855	614.582	407.521	298.199	93.5738
833	193.048	206.91	48.9525	71.64	137.023	85.35	130.326	108.709	57.15	285.668	577.854	190.525	138.584	71.5387	191.599	65.675	70.7975	51.7212	49.4975	143.676	285.897	415.702	95.95	35.7275	126.425	119.128	153.238	247.914	396.629	207.351	452.663	135.785	187.648	198.214	118.969	136.095	163.723	103.796	128.27	254.248	98.4513	190.373	474.087	343.363	601.881	456.771	372.546	438.83	303.9
834	199.01	297.806	35.6763	155.5	125.184	43.305	242.21	85.46	347.55	199.14	1430.94	561.156	250.778	91.0775	279.634	87.6688	255.693	152.751	346.105	93.7763	400.799	173.841	202.654	43.145	205.683	334.861	241.068	402.096	513.354	657.209	346.739	411.476	263.884	321.822	251.629	238.976	318.327	204.036	151.055	372.712	256.652	295.011	645.111	903.499	621.081	1082.86	697.097	387.206	326.519
835	103.798	167.197	60.45	59.2075	104.961	62.615	104.104	104.719	46.2537	191.051	377.41	146.738	154.045	127.679	153.84	89.8688	47.8287	49.2662	56.0662	98.865	124.964	186.423	73.805	35.6425	142.359	160.939	147.778	237.303	433.663	388.67	252.13	147.909	165.798	167.936	107.545	149.865	167.667	167.648	169.876	263.146	97.56	166.935	367.103	218.091	524.908	286.564	306.789	299.395	215.304
836	229.417	366.811	61.5	207.399	332.57	363.515	285.981	306.28	353.256	684.019	478.123	439.736	229.141	309.154	381.726	329.506	151.589	447.661	250.197	605.186	210.59	351.424	375.064	172.202	318.855	105.161	210.384	281.842	269.711	557.235	650.265	249.741	204.661	178.491	132.473	200.443	220.781	273.563	192.506	35.59	76.7775	407.315	158.18	571.775	384.272	718.024	929.691	311.93	71.33
837	154.778	212.835	35.5812	59.5725	183.35	176.813	98.5062	173.724	296.132	294.017	514.774	220.28	240.004	121.296	203.731	96.9587	103.471	128.69	190.598	314.371	139.731	206.74	149.779	43.495	276.501	126.104	119.958	213.586	123.925	194.584	174.985	225.655	162.327	276.829	118.022	241.355	156.023	152.866	274.975	218.065	102.969	486.522	612.197	526.371	455	644.69	636.194	462.084	161.866
838	120.779	129.215	77.7875	173.114	101.793	71.2463	109.865	86.59	324.07	87.3325	167.315	244.077	92.8538	56.1725	143.441	104.853	43.395	40.4275	100.882	43.3188	213.246	172.083	55.7	35.5112	152.405	148.346	158.566	338.467	339.92	325.469	374.965	42.96	79.0563	295.504	112.304	121.785	293.186	105.689	176.119	211.249	185.248	178.976	171.546	177.786	356.621	208.306	236.533	177.653	180.671
839	312.899	1324.48	35.2912	979.727	1183.38	1942.57	495.199	574.997	837.96	2700.42	4052.36	3183.9	1927.36	1228.72	1181.44	1618.7	139.726	2300.09	1620.34	2187.08	366.865	967.905	90.1088	968.883	5695.53	671.183	514.945	733.449	538.035	170.908	235.093	827.725	1746.67	1316.57	404.799	560.879	2161.86	3200.85	1385.85	591.818	419.284	2855.78	3825.35	1019.08	2895.12	2029.68	5232.96	2481.03	1425.37
840	67.9213	196.525	35.2725	74.9387	291.168	104.824	267.676	118.304	71.3637	534.204	2050.01	243.21	348.011	169.385	175.943	209.985	140.395	110.186	162.199	218.273	222.803	150.346	313.719	84.46	321.716	429.45	439.366	729.705	999.86	939.174	362.234	441.879	585.206	489.22	235.313	362.411	581.423	395.509	334.046	561.36	281.255	430.619	818.159	1011.74	1065.4	843.774	1259.33	925.475	526.415
841	164.576	196.94	82.2075	74.205	133.779	76.9287	112.08	65.4412	68.0175	299.051	632.976	167.974	114.719	65.7412	152.894	45.2437	73.0938	38.3988	46.405	140.615	239.669	315.79	131.359	54.575	145.941	189.063	183.231	259.457	481.675	292.329	351.411	181.316	191.366	256.691	135.989	156.313	155.083	163.975	152.394	311.059	94.0425	156.144	607.505	475.166	581.76	633.85	444.426	396.071	250.521
842	121.515	238.998	36.455	73.46	86.1813	39.4738	59.7675	64.88	52.9338	204.244	487.671	143.639	119.463	104.71	96.5062	91.1175	89.915	91.9737	44.9963	102.369	270.021	393.423	143.786	53.1063	159.594	101.272	76.1725	230.213	422.345	239.349	216.186	164.401	110.564	202.425	88.3125	123.381	281.811	168.654	136.898	123.615	45.7738	92.7288	325.401	268.496	343.865	312.466	391.024	217.209	116.624
843	143.18	175.007	57.8575	101.621	160.748	82.79	150.764	223.636	168.534	146.95	948.956	335.61	134.816	92.1175	369.005	123.685	97.3162	81.2025	177.686	136.251	145.911	91.07	324.664	35.25	567.941	189.673	117.353	430.451	243.34	347.017	420.251	197.178	296.266	367.201	121.586	346.954	174.866	367.743	171.299	634.96	179.215	301.957	495.779	1351.41	333.63	1181.68	1139.39	247.425	126.985
844	186.865	367.91	156.226	344.136	188.804	125.191	205.283	152.123	368.715	230.598	201.805	524.184	208.234	241.335	227.564	268.631	60.0688	87.0512	255.559	100.325	348.706	343.348	106.339	35.1713	420.575	195.151	200.35	478.014	576.148	495.272	565.709	79.4425	111.552	305.938	276.121	131.848	321.853	145.058	201.373	346.865	185.265	138.804	507.159	87.44	473.564	177.681	477.245	388.726	76.93
845	295.303	827.54	118.895	273.623	165.693	61.2938	199.794	59.7375	356.176	186.908	247.816	449.965	270.49	148.844	321.128	213.931	88.77	65.9437	141.202	35.155	667.341	497.613	74.0925	37.4763	545.989	574.227	455.13	1183.98	1050.22	648.107	632.504	229.839	245.455	753.894	560.226	492.007	853.401	454.553	482.688	357.435	424.326	469.743	776.61	426.449	745.035	703.089	987.531	699.136	436.739
846	242.865	453.911	156.762	174.003	92.9762	92.1238	271.599	170.697	436.553	280.635	754.967	649.32	120.32	134.995	154.239	90.1238	96.5812	225.23	160.056	200.348	330.889	432.098	35.1475	41.0763	188.923	148.096	168.435	261.185	535.935	474.159	315.535	280.931	224.249	189.73	161.711	112.321	481.239	113.661	114.365	173.632	64.805	290.519	939.128	567.53	519.751	421.803	254.254	373.938	285.815
847	171.38	310.944	35.045	221.856	147.45	82.1012	104.25	70.7887	383.579	194.743	164.999	294.629	116.823	102.79	169.165	91.07	139.78	157.23	172.495	129.705	241.18	310.79	89.1825	87.135	169.444	132.329	145.206	335.623	300.98	262.451	407.896	67.5475	96.07	209.365	157.519	92.24	123.561	55.545	372.834	225.598	235.898	290.716	477.504	242.053	612.589	189.881	263.699	408.854	229.433
848	196.887	265.321	192.825	316.564	126.871	91.95	206.076	165.39	230.426	167.699	154.868	329.249	199.679	141.696	244.711	126.629	106.335	86.9013	151.945	78.7987	240.778	289.119	60.8888	35.035	314.166	218.771	164.241	376.86	465.479	371.861	544.788	78.7125	87.365	350.28	147.86	72.285	265.493	115.199	166.197	219.664	169.239	315.966	379.223	111.088	591.808	172.827	174.34	378.365	215.735
849	159.671	545.704	88.815	294.243	58.9075	62.81	144.229	105.162	307.374	97.0588	75.9437	419.335	210.646	277.496	217.201	701.847	78.7813	67.3812	76.5325	59.875	549.555	387.86	60.1075	34.9688	406.069	232.454	236.379	680.964	635.196	561.14	463.885	88.6513	125.578	296.069	302.724	192.589	165.751	252.144	338.021	210.386	242.412	261.176	590.67	220.581	672.801	369.983	699.424	414.154	243.495
850	178.046	601.634	55.34	347.156	175.884	65.235	246.037	152.059	494.919	175.667	157.71	516.585	347.756	249.264	346.436	714.611	52.1412	123.219	220.196	99.9125	478.441	522.154	129.398	34.9575	451.696	451.337	345.699	773.83	845.791	408.243	388.236	148.331	146.646	376.235	366.516	241.036	259.606	353.569	166.235	404.109	418.087	501.402	496.566	142.289	856.423	576.839	561.403	451.434	206.876
851	314.141	331.726	232.766	283.63	95.9975	34.945	270.04	244.924	208.379	152.536	639.153	321.248	436.341	281.894	391.284	146.426	172.041	139.995	170.894	170.428	323.986	448.916	63.5438	57.275	229.75	247.706	184.791	302.929	706.497	554.764	653.082	325.649	178.846	404.984	288.527	146.944	278.387	106.543	149.393	340.524	118.291	542.325	593.558	564.487	614.526	467.868	402.99	283.469	346.01
852	330.628	541.924	515.36	726.541	333.94	206.07	310.729	167.973	1009.56	398.783	334.51	1221.58	326.841	434.579	628.59	585.329	261.405	427.517	437.666	269.976	756.356	854.742	225.881	126.507	728.046	463.771	542.555	974.365	1266.07	722.765	1923.43	217.539	206.476	938.563	593.758	294.479	708.107	311.67	264.17	107.605	334.166	85.225	740.269	478.345	843.759	417.604	886.332	920.604	152.801
853	264.485	356.166	550.191	328.196	225.3	110.013	233.626	162.898	311.07	178.651	2021.88	1147.84	192.116	91.8263	267.876	34.8575	436.283	136.621	373.408	121.308	270.024	215.954	174.931	55.6825	140.515	442.54	209.024	763.666	646.649	478.842	732.086	599.125	156.636	310.506	440.134	318.7	678.594	184.943	237.632	686.806	251.225	389.01	1493.15	1339.22	1333.61	2287.64	637.055	494.325	649.575
854	427.926	309.108	370.986	360.548	583.872	893.731	345.156	418.819	1531.95	837.575	998.194	586.271	533.031	289.965	565.846	308.946	257.47	228.186	718.503	924.561	441.991	487.5	325.096	216.831	440.471	194.146	224.311	361.136	444.199	657.806	506.305	191.602	295.799	433.137	194.295	364.834	896.176	321.951	184.068	136.059	69.6063	221.963	183.003	323.184	214.443	364.119	503.193	242.95	107.595
855	124.119	166.155	199.98	246.594	61.7375	40.475	89.8812	105.201	93.39	40.1887	72.2113	213.081	150.188	101.329	226.176	65.1762	70.02	54.44	86.9325	37.105	195.287	211.406	58.8775	34.7525	187.251	119.358	165.17	293.079	172.628	169.144	366.358	58.575	73.7188	261.736	127.695	91.755	61.0875	62.895	248.791	135.756	163.162	285.322	527.059	174.349	661.796	233.586	337.155	397.08	213.654
856	58.31	266.104	74.1775	99.9262	154.016	96.0987	71.3725	85.3787	78.87	342.059	387.447	246.341	176.659	98.96	118.08	91.6688	34.7437	88.3863	86.705	145.99	61.9888	237.613	51.92	67.9075	448.809	184.477	192.539	163.535	416.101	172.931	434.595	231.572	272.277	170.329	66.7113	68.0438	289.071	339.339	262.873	339.361	83.5025	455.697	354.824	214.515	815.815	318.688	583.759	612.075	345.871
857	250.641	272.091	280.34	204.64	243.386	203.556	316.413	388.239	306.765	469.368	1052.64	274.69	162.863	95.0062	247.855	119.875	49.2188	44.8188	120.151	304.332	297.221	293.465	84.3838	34.7263	280.414	180.935	186.111	408.515	730.679	577.539	432.152	244.958	208.825	386.39	132.37	116.831	976.753	119.734	93.0787	47.2013	46.1437	127.465	80.4712	239.941	374.735	133.436	432.836	417.094	115.689
858	88.7925	189.649	73.3888	76.43	192.811	89.24	137.809	92.2537	51.8888	250.176	709.11	182.088	196.245	82.9237	159.924	83.4788	34.6337	36.2475	70.99	120.813	124.716	206.387	35.375	36.8413	210.443	311.846	164.265	281.506	355.345	333.22	207.161	238.808	138.286	256.184	41.4637	155.778	349.873	128.768	283.314	209.012	65.29	524.839	242.498	474.761	699.844	551.068	366.754	642.72	219.84
859	204.499	258.408	67.6287	129.308	74.8	48.2113	152.305	84.9737	156.43	103.272	756.776	239.989	178.21	81.1737	159.814	80.0487	139.736	94.5512	155.821	93.0938	238.211	218.505	86.1137	34.615	122.19	144.433	129.656	195.325	269.321	296.116	317.816	142.439	90.9	260.425	198.651	137.036	156.966	95.9237	85.4463	258.745	115.515	300.059	338.025	546.325	334.596	533.105	272.988	205.12	175.889
860	199.971	261.75	123.488	142.725	136.657	152.454	200.713	284.195	162.411	387.859	630.629	226.961	166.493	129.5	313.114	79.3143	34.5982	55.1768	89.7161	168.902	359.646	452.245	96.7429	49.2857	164.941	133.796	150.657	226.839	491.489	309.179	398.83	129.502	186.9	211.382	139.696	112.989	455.65	94.9018	158.839	137.191	61.3411	185.293	423.802	383.036	496.129	358.409	487.391	482.071	255.982
861	109.116	166.249	48.1238	56.845	104.656	56.655	91.7412	37.4975	36.6538	175.689	384.575	109.543	106.318	69.97	101.681	68.2262	43.77	36.1088	39.5962	100.841	159.988	230.345	84.5487	34.5363	170.262	135.899	191.936	264.973	423.521	268.614	384.42	247.053	190.044	296.47	161.679	172.699	210.033	146.921	142.355	274.358	84.1625	161.339	571.086	422.119	576.771	588.479	401.559	384.012	328.111
862	67.5088	94.0206	87.3368	97.3382	103.56	83.4456	62.6647	131.96	67.0029	214.924	264.56	96.6132	157.175	85.7	176.941	101.168	70.6706	47.8985	58.7265	128.687	112.524	163.203	73.5515	34.5279	117.959	59.4074	68.9	118.793	251.76	169.296	241.469	89.1235	106.265	152.707	64.7382	56.6471	172.856	55.3162	123.579	172.521	59.0015	126.204	241.068	193.306	288.687	271.86	244.618	262.578	172.516
863	203.904	277.839	192.566	265.086	110.53	97.9875	259.641	152.919	297.011	186.528	146.876	304.493	162.144	168.485	285.623	180.42	56.3638	41.5037	125.388	101.996	248.471	308.004	48.7875	34.5162	262.97	147.468	123.906	247.158	475.561	328.26	372.94	70.2625	68.5012	215.68	123.706	65.1575	535.439	79.5113	103.818	145.273	132.796	195.161	267.356	118.795	301.065	113.936	194.256	347.371	95.9188
864	191.102	186.037	176.12	127.785	106.165	135.54	264.001	180.048	431.62	217.544	482.61	220.055	95.2512	59.6887	97.6787	77.6725	59.1375	87.9387	151.924	173.254	227.196	200.371	42.98	34.2837	155.569	114.865	87.305	229.503	383.786	287.02	203.424	124.914	140.463	173.095	119.834	67.1162	400.82	57.6463	49.115	107.186	47.91	163.641	239.408	285.83	253.183	243.874	199.595	103.829	82.6
865	89.2	80.3821	45.8929	38.5786	73.4893	139.146	71.3821	117.164	242.096	165.154	296.232	114.654	115.007	92.8429	146.632	179.425	45.7643	82.4929	112.132	112.104	87.3464	132.189	126.896	34.2357	155.646	66.6214	56.3607	69.2893	99.7214	157.611	129.293	94.9536	148.786	133.043	87.3571	122	90.2107	144.896	138.446	188.268	68.4821	268.325	146.868	289.629	206.689	408.129	383.743	174.046	71.8929
866	118.859	226.665	194.081	157.933	133.579	123.618	147.911	124.52	109.04	222.375	307.295	495.545	115.495	76.295	198.279	87.8863	75.2113	47.6325	68.9125	167.761	153.641	269.474	67.435	40.1713	114.52	88.8238	111.371	194.546	467.348	287.058	331.614	236.751	110.13	168.232	81.1937	63.3212	372.004	63.0313	184.382	127.17	51.4412	218.294	386.319	195.606	523.957	222.753	329.58	443.161	183.688
867	125.541	370.644	132.123	189.618	119.147	86.0463	189.299	182.729	141.771	197.398	66.9825	355.697	147.121	140.929	389.163	44.6262	39.4988	45.0737	111.823	80.585	273.491	334.301	48.73	34.185	310.712	333.969	233.768	315.696	824.053	533.596	451.868	131.29	81.6975	518.178	230.577	241.183	456.045	196.981	295.137	210.149	802.316	619.8	689.185	554.541	775.944	669.396	529.729	995.433	137.649
868	108.82	96.955	208.775	55.5625	257.864	140.244	128.316	163.963	174.715	248.204	525.206	228.393	156.912	92.7837	281.216	78.42	99.6825	74.815	143.623	160.14	95.455	201.553	130.894	34.06	162.166	73.4963	74.5225	173.274	191.335	180.739	593.399	291.03	84.8725	312.416	95.9188	158.046	151.991	120.378	157.368	117.995	79.0825	268.651	418.411	506.098	304.543	370.878	436.899	245.174	159
869	159.789	213.461	147.161	115.14	158.775	139.72	182.215	246.5	153.81	225.661	536.989	131.118	139.545	95.5138	273.421	182.041	41.6875	67.0987	83.2212	177.664	224.539	268.641	56.755	61.5225	125.36	137.398	108.813	302.124	465.69	243.417	218.109	94.7638	99.2325	139.325	73.4925	52.09	462.099	67.1188	80.3812	109.411	34.03	138.778	125.733	378.474	340.397	185.969	365.841	242.523	109.95
870	131.362	495.05	45.9929	158.374	87.906	63.106	123.267	91.7571	438.968	85.6036	42.7476	385.717	113.165	130.483	94.7429	207.97	42.7476	84.0179	93.5119	70.0012	187.324	220.463	56.0988	33.9536	355.418	178.315	164.979	381.543	345.344	378.762	291.702	81.1798	120.763	249.106	149.039	167.421	194.111	162.621	174.727	237.873	261.774	304.89	448.124	88.15	648.794	240.018	471.708	622.681	250.687
871	168.319	174.174	132.486	139.715	89.6988	78.565	199.695	128.216	292.044	173.646	388.267	223.815	135.007	112.196	103.086	39.9738	102.61	92.5925	130.637	142.695	195.555	208.25	41.9387	33.95	165.14	116.289	107.78	222.445	364.69	317.399	221.533	147.974	137.153	200.973	114.449	63.1437	345.726	62.1925	36.1175	125.081	65.97	166.553	220.549	254.426	216.202	270.876	161.486	116.01	110.895
872	180.623	309.712	50.8312	59.0487	70.0575	54.5913	133.22	138.411	157.441	90.8388	498.685	293.017	67.635	50.8988	56.5838	33.84	54.865	142.266	73.8012	94.3925	137.349	216.314	56.6063	38.5875	136.785	55.775	128.673	210.018	181.126	315.416	179.591	110.78	177.346	303.444	184.746	86.345	332.365	64.4163	80.4938	188.48	66.6012	228.086	527.125	753.311	386.628	772.444	336.604	263.456	205.188
873	326.45	391.447	133.136	255.484	214.303	100.613	183.209	174.916	196.124	203.794	223.85	257.262	191.548	143.471	298.745	180.348	95.89	81.3325	136.695	90.5175	363.983	334.586	123.246	33.8237	302.741	218.637	156.999	466.69	522.44	319.197	626.771	79.525	125.683	341.804	183.384	131.474	405.464	182.813	161.601	295.635	470.189	315.316	352.748	147.857	627.38	232.994	386.589	393.384	74.4838
874	107.23	78.8713	37.3162	41.6463	78.9575	97.1612	58.0637	124.18	147.452	166.141	218.244	105.744	98.9975	91.8637	124.338	37.9063	67.1338	98.8012	121.585	144.689	70.46	142.014	126.793	36.31	115.49	52.2287	74.9912	124.691	170.699	141.653	187.034	78.5175	81.4188	166.914	74.42	69.19	142.295	112.638	143.499	110.613	33.8212	234.199	144.741	182.526	223.016	236.165	212.444	131.834	78.5012
875	109.709	103.565	61.3588	63.8963	117.516	128.566	83.4075	141.085	134.35	197.99	251.306	143.189	121.007	83.98	194.648	104.489	61.1313	107.168	100.925	180.054	113.689	150.886	113.115	66.2925	176.759	62.9925	75.9325	125.021	148.786	148.954	141.558	90.3125	72.2813	156.072	74.11	124.379	130.438	115.289	130.045	102.036	40.3225	200.48	288.741	282.361	206.754	313.599	351.93	163.482	90.2913
876	103.965	122.42	64.9313	70.8863	136.62	182.829	128.384	215.97	288.631	209.973	233.675	197.61	134.956	124.485	135.801	78.4587	69.8088	56.675	143.124	230.341	112.185	128.409	111.503	42.4263	146.694	62.48	68.4613	161.938	204.884	225.488	196.732	112.56	127.05	149.66	86.575	133.171	206.649	140.831	86.6112	71.9437	42.07	390.471	135.6	186.394	342.846	236.011	203.713	405.224	51.79
877	212.757	196.399	88.8937	117.469	216.439	189.815	121.185	145.387	335.44	226.745	325.31	184.846	184.511	161.981	196.969	141.162	106.639	148.695	242.586	292.798	175.981	226.316	148.864	33.7638	227.285	86.8	93.1663	183.965	252.33	299.056	214.348	107.743	154.5	181.898	108.043	138.371	281.19	138.984	151.523	124.748	44.1475	218.908	315.043	269.871	241.844	256.235	439.965	196.601	98.56
878	2740.43	708.424	17567.8	1959.9	2297.54	116.55	1635.78	182.303	1457.4	4968.33	1483.58	2353.3	1051.71	1185.77	4268.41	2766.03	703.398	33.755	513.271	167.563	458.103	5124.77	2171.07	95.5362	9288.4	3189.18	935.572	967.778	5152.06	798.565	521.54	190.822	141.979	12648	2221.54	1529.92	5699.42	86.2837	2858.76	4325.67	3394.66	661.805	969.74	293.859	3831.36	7955.98	10114.4	2254.64	862.805
879	253.191	259.001	198.425	160.69	100.552	107.01	232.903	146.28	216.285	191.97	511.486	316.649	223.584	148.001	156.221	105.93	223.466	140.2	140.475	140.262	269.736	272.891	97.1075	41.15	197.231	158.521	137.708	217.958	473.058	422.473	454.82	169.639	151.571	210.47	180.482	77.3075	329.451	79.61	55.8475	203.406	69.0613	74.495	227.76	92.7687	158.518	241.64	209.184	107.083	90.96
880	180.679	180.583	87.52	149.736	62.0812	39.7825	192.76	150.335	176.486	172.254	406.369	262.964	199.3	122.064	180.64	46.4725	120.863	93.8375	109.353	148.385	215.585	248.986	65.0187	33.68	149.955	110.408	89.485	205.294	277.085	296.81	289.965	82.5138	119.156	215.62	163.116	82.6125	112.052	73.9375	82.1925	210.542	69.8575	315.952	313.168	366.173	351.595	358.951	163.299	154.145	197.444
881	243.634	212.063	173.046	150.219	81.7825	100.326	121.186	173.678	149.819	136.119	365.695	222.111	220.175	108.793	113.818	33.8687	100.974	111.563	90.9988	143.266	200.554	214.661	36.9063	33.6713	226.414	194.473	180.264	283.691	490.257	398.44	411.772	195.098	186.759	336.938	241.183	138.539	256.885	113.893	148.218	282.327	110.631	455.254	568.786	462.813	604.523	617.575	294.142	340.322	382.08
882	338.854	464.544	75.7588	94.5613	390.298	153.675	257.837	193.808	462.207	501.587	1454.92	295.821	848.575	191.281	292.387	33.66	297.22	102.693	234.474	263.591	687.93	627.673	425.462	62.69	696.16	641.197	658.53	1147.7	1877.98	1708.75	647.285	764.681	430.165	909.418	365.308	683.143	1278.42	621.673	461.415	722.452	203.986	570.276	827.284	1618.93	1263.31	1427.59	1886.91	1053.95	505.098
883	71.6238	222.645	160.705	396.72	70.7405	71.7202	389.677	56.8119	88.2917	241.775	46.6655	281.514	142.738	201.624	323.633	454.138	33.5869	73.7917	95.019	97.6036	462.367	272.604	110.248	38.1976	384.151	296.096	170.658	166.418	128.24	379.706	510.304	63.8512	79.775	196.169	109.487	78.3571	338.079	154.481	202.1	127.961	113.17	274.3	421.77	543.112	485.93	348.565	1116.48	350.211	157.081
884	439.216	597.127	400.202	626.405	264.407	251.65	366.359	323.32	925.666	542.548	310.834	852.32	245.832	236.705	630.261	411.63	46.8432	41.6636	358.58	198.918	442.948	582.409	86.8477	33.5568	501.586	275.473	236.48	514.716	820.911	441.761	771.675	123.782	137.78	469.002	236.916	96.8068	868.632	158.311	380.502	293.559	271.568	366.132	516.414	377.891	759.775	389.007	475.625	358.38	265.432
885	202.542	194.187	127.431	200.83	165.705	82.3726	209.824	241.137	122.174	308.861	1062.83	117.544	234.886	140.058	397.136	95.869	50.9869	34.681	58.6095	133.345	285.1	327.363	114.679	33.5548	254.231	258.219	190.419	374.146	715.64	468.968	386.793	197.892	233.287	251.177	158.955	223.32	610.886	255.654	113.439	252.252	105.783	179.84	548.563	610.404	444.91	560.467	1547.09	336.437	276.069
886	211.82	209.724	112.14	100.566	85.2025	53.425	128.695	113.391	235.506	148.05	337.064	231.729	78.29	77.78	164.338	38.5087	89.6325	114.233	138.751	106.276	254.085	217.971	65.2975	33.5438	84.165	115.485	83.5012	209.304	279.358	196.405	204.916	148.818	103.103	143.982	105.498	80.4087	186.879	83.55	54.3137	169.2	54.1613	176.697	297.741	368.761	269.474	382.695	206.234	142.004	145.425
887	179.985	162.339	33.5412	87.6775	154.808	125.543	151.264	151.834	217.601	180.615	368.571	204.9	254.985	144.429	205.382	47.6925	140.576	130.884	194.637	126.064	148.955	267.374	211.208	39.9988	287.098	115.353	167.24	276.965	290.516	297.137	325.306	268.951	239.673	282.113	150.026	293.461	116.371	273.882	235.04	250.697	129.804	406.527	593.158	533.215	606.774	766.421	676.636	435.76	192.348
888	180.146	214.809	76.9537	85.4663	152.666	125.11	111.146	204.344	304.129	219.928	437.786	249.574	250.917	200.588	224.515	60.2475	125.194	113.426	176.671	185.202	144.01	210.74	142.736	33.5388	307.635	111.12	107.22	316.37	183.179	302.126	310.161	188.706	173.868	319.978	149.901	271.795	270.793	179.909	218.088	231.151	84.9475	458.574	489.707	520.985	421.283	603.105	654.467	323.346	124.729
889	275.442	286.294	158.939	178.75	206.156	182.806	222.956	137.058	129.236	223.789	702.181	290.836	216.681	100.025	382.228	45.85	65.0417	33.5194	92.2639	165.083	342.975	528.267	42.1306	43.3444	239.478	250.347	160.669	313.858	559.3	394.889	554.214	273.222	160.167	261.219	115.85	220.6	471.531	99.7833	284.817	341.786	114.081	599.169	421.033	461.289	777.558	1011.48	574.625	587.3	338.756
890	205.916	254.856	74.3625	125.051	130.241	120.24	279.276	135.691	338.564	163.945	628.27	318.285	133.2	102.268	126.815	52.975	84.4075	104.334	137.588	152.801	246.729	199.571	65.9425	33.4725	306.516	312.277	250.936	412.406	633.229	557.784	337.045	392.579	375.686	376.902	250.673	201.745	502.538	177.615	102.45	206.859	82.5387	410.039	760.115	611.332	796.329	855.124	471.586	392.164	384.318
891	214.824	334.212	167.705	220.884	145.02	88.48	145.661	117.266	282.381	165.943	200.994	362.996	162.161	124.751	240.954	160.903	82.8563	58.6138	160.674	71.58	225.576	311.676	79.1462	33.4588	343.575	186.974	161.925	610.635	555.189	333.925	481.28	109.274	116.849	390.021	186.416	104.765	313.822	101.461	285.908	253.938	289.369	333.215	465.329	339.019	648.543	382.281	490.554	414.995	255.928
892	58.345	290.746	66.6538	62.5288	100.496	112.019	76.4813	81.7825	71.7	440.755	314.286	393.914	93.905	120.088	63.1838	86.34	57.6912	33.4275	57.7125	176.658	122.818	234.966	157.946	47.4875	108.675	113.316	119.363	142.713	221.091	233.764	151.102	123.856	55.415	132.08	64.0175	50.0238	128.785	43.5475	322.048	113.429	40.7275	171.645	234.906	159.001	423.955	170.876	259.244	442.123	232.101
893	80.3875	241.394	47.915	91.3787	190.599	91.0637	248.618	160.256	475.664	236.599	822.885	287.428	188.399	67.06	311.004	136.145	104.305	111.914	224.22	156.716	246.348	146.031	197.756	33.4125	447.786	230.856	219.058	614.601	421.681	398.751	432.22	423.068	371.429	797.596	263.921	905.106	208.771	663.696	184.169	325.064	209.215	361.369	855.121	951.81	567.128	1182.27	1203.45	498.416	137.799
894	115.866	183.986	33.4113	81.8388	117.221	135.833	47.755	156.35	460.414	205.055	151.524	199.373	133.126	118.419	215.446	145.889	140.283	83.7975	154.561	129.29	144.336	150.835	134.798	49.3387	158.649	41.2075	76.9875	204.838	191.874	166.376	411.51	188.205	104.004	317.504	127.333	146.246	122.709	78.6675	230.431	235.262	91.8225	213.193	345.68	181.005	342.73	324.221	394.991	39.0425	57.9838
895	395.674	832.215	33.4038	137.644	305.169	188.06	214.357	254.794	372.315	782.25	1038.06	457.681	474.017	437.938	194.86	867.756	137.886	337.111	208.224	454.309	573.33	890.393	327.798	168.009	415.546	254.83	410.576	980.996	1406.08	1270.01	263.14	355.658	320.915	579.276	283.696	372.475	433.275	656.526	490.394	382.084	132.006	478.399	1267.75	1056.94	1644.44	1014.99	1620.69	1305.36	582.695
896	256.559	229.985	230.941	323.009	129.449	98.3238	211.665	175.189	205.313	155.265	169.924	232.423	228.579	165.887	245.161	196.636	100.199	130.287	164.218	108.661	243.944	297.244	106.214	48.4813	207.279	125.826	135.852	341.916	290.766	327.452	341.397	33.3638	72.5337	315.259	87.0825	81.0563	208.208	67.07	155.193	258.283	210.631	360.429	323.431	246.667	601.444	311.93	393.7	295.886	227.429
897	128.28	1015	155.284	843.301	56.01	393.661	142.781	416.219	64.3	345.531	283.993	1116.47	171.648	552.734	727.27	490.75	607.085	501.805	45.45	363.015	158.319	1018.92	33.3575	174.846	168.921	87.39	248.618	88.5012	284.086	367.019	547.305	485.462	513.82	102.674	110.263	43.3338	51.4113	86.6963	661.655	322.504	109.719	1352.3	1824.01	423.76	2305.36	493.327	149.014	1623.77	1343.12
898	196.758	257.018	220.738	250.826	133.087	105.658	188.298	159.52	354.224	160.145	132.764	311.8	167.35	117.218	208.876	124.615	58.4571	59.7667	124.321	64.8024	171.499	237.96	52.531	33.3548	272.194	140.551	126.123	360.249	525.494	263.192	402.708	71.5048	72.9619	298.68	114.405	89.7274	606.287	84.9619	219.236	181.375	164.607	250.227	316.854	288.798	492.568	255.498	255.599	285.756	168.373
899	94.8536	73.9679	46.4036	53.1774	106.831	123.965	74.3679	100.333	206.47	205.126	302.032	154.707	137.931	104.496	154.7	76.5869	64.7286	71.5	99.1976	120.949	128.554	168.724	104.048	33.3357	145.218	61.8012	63.9881	117.481	183.433	158.329	165.549	107.471	75.8631	147.177	82.5131	113.885	130.52	110.071	132.736	119.844	39.2262	225.258	261.168	275.506	229.413	266.231	272.176	182.598	119.563
900	262.092	331.471	216.878	392.327	190.683	169.333	388.699	328.509	437.868	303.359	263.129	364.951	170.193	184.628	289.467	212.102	99.15	113.231	218.184	166.132	255.099	305.381	251.561	33.2212	412.249	200.085	184.026	403.837	736.995	391.248	601.166	106.406	100.988	361.784	200.531	94.4188	941.831	157.614	218.516	258.033	230.428	353.671	572.982	262.628	703.739	209.03	321.493	392.082	79.8925
901	124.463	193.063	191.08	210.102	50.4562	40.6675	118.56	109.101	162.044	122.035	59.6713	178.586	87.5075	96.7638	266.14	74.1875	48.5175	33.195	77.7175	56.665	234.536	223.908	42.8525	34.4913	137.494	117.379	107.938	206.632	686.254	309.021	299.594	36.54	85.2375	315.962	73.0987	297.926	414.361	50.935	205.482	166.105	204.753	248.985	215.061	250.912	461.038	194.391	1209.09	204.965	147.359
902	137.704	164.322	161.159	122.656	125.305	119.544	140.155	238.32	174.325	275.151	539.42	147.419	156.379	85.39	200.651	55.9288	35.8525	38.6725	58.2888	157.169	203.621	329.952	59.93	33.06	232.246	161.403	193.623	367.139	705.381	499.976	494.825	171.506	180.05	290.185	184.135	101.294	645.385	139.439	223.639	159.079	39.61	245.607	301.511	288.594	778.106	375.21	611.451	506.194	155.845
903	141.748	280.916	148.65	67.1525	97.1625	51.6987	90.8187	95.95	35.7738	200.348	906.936	178.343	137.864	102.109	149.009	88.7738	40.2338	40.7287	48.8625	79.37	257.245	331.256	523.237	33.045	226.584	166.479	179.769	445.522	617.34	419.491	286.125	261.697	162.726	232.595	109.028	147.827	195.055	103.054	234.778	383.336	119.397	201.974	530.229	428.93	768.592	604.976	345.731	408.326	217.71
904	173.66	247.598	74.9	162.725	77.994	33.0167	90.2643	123.125	158.893	139.086	108.848	181.979	106.939	122.381	137.893	88.2107	56.8571	80.4036	61.094	50.8155	138.133	230.835	74.9667	37.9786	197.945	64.1036	114.52	179.535	147.505	233.488	212.581	37.9298	57.5845	219.714	127.546	84.9107	96.2274	63.8702	83.0369	95.7024	167.308	126.969	185.235	216.193	365.105	257.719	252.983	213.551	66.3786
905	178.299	204.155	298.57	280.076	111.813	76.485	185.085	139.836	453.93	205.225	149.561	328.99	162.24	98.8975	232.993	178.727	46.6425	53.165	174.791	90.6225	229.091	216.305	32.9988	53.9363	188.153	121.074	119.193	264.129	371.456	220.469	306.239	49.8062	59.97	240.943	90.3263	56.0025	454.851	80.5275	121.358	115.121	91.29	117.823	163.606	154.214	341.941	154.982	179.451	194.545	88.635
906	640.946	298.183	75.0375	268.683	88.0387	37.5325	90.8637	87.0812	684.212	192.194	247.665	336.436	193.29	170.505	246.426	134.651	93.1388	88.685	263.152	61.6987	255.455	335.642	42.1675	32.99	352.114	241.746	187.611	1017.12	885.635	262.06	247.864	101.382	155.84	483.558	384.993	90.5362	570.089	142.444	272.438	421.725	322.988	268.568	346.244	260.697	520.91	133.855	256.1	278.955	215.322
907	72.5075	495.507	60.6262	47.53	160.83	83.6875	176.139	135.214	50.9475	434.64	795.211	247.38	172.161	154.2	174.861	138.491	32.5063	56.3438	46.62	188.284	162.59	402.551	85.33	41.3888	152.169	146.158	213.958	260.924	448.038	448.808	375.81	223.989	125.644	275.439	157.55	182.488	422.322	168.417	217.896	234.99	94.9075	279.645	448.95	281.261	577.8	392.065	750.428	692.568	244.264
908	100.991	639.49	63.6187	451.522	206.803	48.7475	131.181	53.7175	561.727	67.31	297.45	378.201	206.679	151.434	287.091	597.719	51.635	71.0037	115.001	48.2413	365.871	269.911	32.4338	36.1437	309.211	795.808	237.741	424.83	861.681	394.039	559.629	124.815	381.885	364.07	235.556	164.664	396.147	454.462	137.92	314.45	320.766	506.196	413.712	707.134	942.619	386.647	419.6	429.691	245.756
909	117.624	88.0875	43.37	67.8512	127.606	144.143	79.8425	106.897	209.351	134.5	307.428	145.589	131.82	79.31	177.965	169.456	83.7113	50.2475	138.925	131.213	93.6538	139.259	154.526	32.4075	213.614	69.2825	67.5987	162.773	189.319	181.33	192.296	81.1875	111.533	185.636	87.2288	125.625	147.556	151.732	127.114	140.232	49.5525	164.47	202.724	218.995	228.429	375.606	285.121	156.988	55.06
910	77.9912	251.463	281.257	221.757	108.209	84.6262	108.025	120.868	74.7775	184.158	54.7413	302.051	148.7	137.333	147.301	97.3787	114.97	122.073	65.4425	71.3713	154.959	288.265	123.171	32.3638	154.411	105.14	116.379	233.66	137.648	195.901	811.096	59.665	33.0613	166.5	104.08	76.2588	112.196	38.195	221.974	171.45	255.224	227.536	309.53	63.4725	408.209	201.227	161.224	248.279	149.455
911	113.696	146.341	46.015	98.545	160.514	170.065	160.804	194.469	363.819	328.832	403.814	233.486	141.335	141.106	315.714	168.356	76.36	88.0375	148.461	239.481	131.327	194.191	86.8662	73.8662	261.543	72.3137	77.385	227.593	87.255	161.796	178.396	88.6775	152.044	320.78	101.851	197.215	267.355	178.199	190.399	119.706	49.6412	386.165	211.831	450.989	322.25	464.931	577.903	306.475	143.18
912	44.2888	142.533	109.665	59.5863	97.6513	240.281	84.1937	127.021	282.076	453.381	410.756	668.616	91.7638	82.5225	142.23	42.3588	153.311	109.481	249.899	222.166	43.7013	56.085	69.37	62.5787	128.18	32.4588	70.3363	291.865	156.011	97.345	298.283	252.129	129.459	512.737	66.2913	143.915	67.53	60.8588	226.686	182.194	128.641	751.005	718.183	1059.04	750.52	501.57	396.772	709.404	262.683
913	148.993	186.551	92.8975	114.17	205.51	148.135	179.729	228.02	342.673	352.649	711.36	336.788	187.101	156.591	273.909	157.681	136.806	81.5575	182.838	176.37	139.931	171.284	205.136	32.2537	265.671	153.601	138.174	419.629	206.719	358.745	352.94	244.15	325.96	455.486	164.446	530.989	219.268	317.666	195.97	246.81	132.602	422.743	581.936	611.166	490.295	735.793	893.335	334.451	133.533
914	193.604	228.865	171.409	271.344	129.646	45.4537	137.468	116.505	176.792	159.096	156.676	493.918	77.9575	108.069	223.454	57.6912	54.5225	51.7975	115.184	35.6662	215.781	359.446	49.7987	32.2425	174.333	188.194	204.561	319.245	175.183	290.349	467.726	49.1812	70.225	394.126	252.185	183.784	120.141	130.131	324.019	221.814	301.699	337.189	363.554	84.3425	874.288	219.845	449.02	515.099	269.576
915	127.766	100.318	111.23	137.195	70.7037	44.9675	128.47	75.0563	94.0588	75.2375	59.0887	188.093	88.6838	62.445	91.5263	55.0825	42.02	45.6013	65.2463	33.2212	133.503	174.118	32.77	32.24	203.952	79.6388	103.129	212.352	203.943	149.949	198.178	35.6587	49.8813	259.351	83.3888	63.0712	214.291	39.8638	137.116	108.536	187.025	131.716	165.439	131.094	327.634	151.248	173.484	156.466	142.041
916	97.5631	257.229	79.1964	156.807	87.3107	39.3738	91.1667	57.3536	126.695	151.229	379.69	293.227	131.186	137.07	98.0119	48.3333	115.12	127.587	94.7405	116.504	251.05	246.168	32.2012	33.475	243.894	111.957	103.54	181.064	234.975	230.893	240.639	147.901	180.942	167.683	106.146	106.165	133.551	81.8571	145.456	178.104	66.8036	239.971	714.068	652.93	387.295	401.188	452.071	340.357	291.043
917	158.199	208.589	162.291	193.786	88.45	62.4525	108.363	71.54	202.646	113.693	84.0675	194.175	142.126	132.346	191.315	102.586	69.1813	104.393	57.6925	51.5613	195.461	210.489	83.74	54.2413	194.31	108.986	105.448	336.663	225.255	219.303	284.608	38.9787	57.24	284.98	91.865	71.7338	276.91	65.3238	55.9862	62.4625	158.628	73.1825	137.146	170.673	269.906	165	204.661	152.469	57.145
918	272.452	1039.32	299.949	758.426	71.0837	210.459	294.248	175.08	87.7362	535.232	626.247	758.516	148.331	284.998	199.148	66.3438	87.975	565.064	203.697	508.941	318.043	733.405	32.1337	184.938	214.143	74.7325	180.334	277.63	405.318	600.313	91.0037	188.769	219.143	256.603	222.423	111.471	550.024	84.5325	272.541	156.604	233.131	2413.54	2028.06	990.056	2671.34	751.93	612.925	1937.45	502.509
919	163.352	157.551	205.8	206.535	174.119	129.342	195.433	249.873	220.789	282.757	519.924	198.207	217.394	115.596	228.945	133.211	95.5881	37.3929	101.438	176.594	182.898	263.583	85.044	32.1286	293.932	230.015	270.626	320.983	778.033	566.975	424.948	239.067	284.87	336.149	134.743	168.649	781.936	183.036	119.06	223.814	61.6357	137.102	411.425	452.127	564.586	450.756	619.854	456.588	195.618
920	112.454	294.313	195.679	245.367	205.746	54.5042	112.638	98.4167	115.879	97.0521	57.2146	451.5	194	172.419	264.479	158.879	38.1271	32.1	125.885	50.7958	194.573	231.625	41.4708	56.3667	118.158	112.162	127.581	242.498	249.146	210.927	262.758	50.3188	75.4333	216.623	124.979	114.929	133.323	58.2875	144.217	113.65	126.227	113.044	396.808	210.906	377.36	200.412	206.156	446.254	145.733
921	206.885	244.871	216.256	214.311	266.934	250.746	247.468	256.979	412.76	432.774	585.168	289.491	158.357	134.403	319.967	145.684	54.3438	32.04	138.469	332.284	196.739	235.223	48.6013	47.0637	181.162	155.004	173.045	266.05	516.999	423.467	345.38	141.384	172.24	282.379	138.084	101.934	618.264	92.3863	148.444	85.5588	59.5525	147.9	114.574	307.402	439.077	318.421	420.399	363.816	219.945
922	72.7913	92.7712	79.0362	90.3175	160.045	211.55	70.48	206.411	114.835	168.373	222.81	364.304	77.7687	142.209	224.841	135.871	155.123	48.96	85.3275	149.618	61.5025	263.485	264.345	40.6763	151.119	78.3137	104.703	77.7438	122.524	231.526	1061.89	199.257	71.97	138.686	132.585	213.994	75.8637	103.583	94.4387	81.3287	125.108	201.4	71.4087	137.683	392.304	420.695	394.22	56.6025	95.51
923	202.831	259.269	131.59	279.584	122.493	44.5012	90.03	158.691	109.12	158.238	132.91	242.354	121.98	90.2925	154.551	117.001	68.6563	86.1575	126.003	52.3575	228.063	282.599	59.0775	36.205	120.695	138.283	112.619	355.863	205.637	239.94	298.329	31.8788	75.3413	325.913	88.4813	85.8475	70.4562	58.8787	148.35	238.271	198.325	246.32	139.993	35.4925	457.995	124.558	124.034	257.139	96.9213
924	345.456	436.811	185.29	205.114	158.358	67.5357	241.814	199.954	250.173	248.646	589.158	473.311	276.677	157.515	165.217	79.6393	279.293	275.494	246.723	153.913	371.783	483.529	62.3964	60.7202	361.363	243.289	200.698	420.925	456.164	589.113	322.331	331.239	215.581	369.105	233.223	150.631	375.554	152.085	99.8464	453.073	201.624	267.19	340.923	458.619	376.15	307.325	238.59	217.299	154.258
925	205.606	385.053	79.9163	167.783	106.255	39.6337	114.419	36.1675	558.035	150.325	197.774	255.756	94.335	114.993	145.279	167.324	79.1488	80.9325	172.225	40.0775	351.699	255.57	194.735	31.72	257.269	184.188	170.794	468.57	516.656	317.735	444.832	80.8575	78.5662	328.399	248.564	153.001	320.211	137.463	198.056	269.456	196.933	174.185	450.048	269.234	501.141	413.608	514.938	315.582	71.8625
926	97.0893	180.963	147.777	137.593	200.614	158.307	180.895	157.156	103.635	283.651	550.514	219.594	157.279	97.7881	171.704	95.7381	73.1905	43.4357	84.0869	198.975	99.5429	150.664	136.793	46.3905	167.038	157.946	195.156	287.779	398.638	335.864	425.58	168.625	181.914	249.546	134.965	130.973	222.721	109.626	140.813	131.45	76.7929	133.807	93.225	220.608	289.115	148.585	31.6976	199.688	136.423
927	92.8287	93.7113	57.1825	61.7713	106.576	117.528	41.0363	103.986	180.546	143.775	257.401	123.635	127.859	112.18	108.853	37.1887	52.5162	56.3225	105.951	161.345	101.616	100.783	102.801	35.2175	181.678	70.8775	67.1838	145.801	118.54	210.349	207.749	78.8662	124.586	153.708	77.905	131.215	231.129	130.826	91.8375	88.1688	31.6575	205.55	200.314	246.806	176.308	309.98	363.09	159.537	82.7338
928	245.512	885.384	410.095	385.618	221.318	132.67	150.654	144.607	376.466	321.475	148.895	479.045	307.503	220.714	427.526	242.58	158.072	73.445	112.035	116.66	107.245	980.327	152.766	31.6475	156.544	319.618	368.056	376.288	1008.05	508.07	1203.56	390.599	91.5025	736.751	357.382	166.134	631.818	56.48	551.096	773.595	752.638	568.799	1014.32	346.663	1184.79	652.194	588.669	1072.48	436.146
929	263.158	485.295	195.634	322.35	128.239	117.379	56.8462	251.354	120.376	219.346	148.903	582.461	127.851	134.275	250.121	194.284	100.591	92.6375	157.093	113.818	187.514	372.839	82.765	59.65	198.964	82.1088	143.81	334.09	66.2775	272.647	245.02	48.0175	64.4025	338.78	132.287	69.1338	31.5588	55.32	330.069	343.152	302.228	714.83	546.79	177.414	856.819	368.981	381.184	620.773	518.61
930	181.333	252.564	183.479	203.225	105.01	33.7037	130.704	111.046	393.447	71.5463	116.081	267.015	105.279	147.343	171.054	237.776	85.07	85.1875	105.349	56.4663	202.781	274.411	77.1887	31.3225	131.602	233.024	206.654	472.938	510.766	275.764	475.219	59.7587	108.802	429.332	302.695	149.351	222.542	96.8713	256.327	249.171	297.691	182.166	281.946	183.947	599.361	215.339	260.303	336.261	106.16
931	161.501	266.563	339.785	192.199	207.935	372.435	305.887	171.555	486.777	540.318	1020.71	384.034	242.792	265.769	150.643	465.305	31.2925	174.259	143.336	522.666	108.976	510.928	61.34	148.19	375.526	182.541	321.163	340.186	1147.03	498.479	460.95	412.544	282.245	389.315	169.755	166.656	1281.23	65.6188	330.551	221.859	83.0125	638.534	571.76	207.498	1388.31	271.531	303.831	846.654	427.59
932	212.84	271.404	207.829	181.494	110.071	89.7292	221.879	206.979	106.444	130.796	110.398	144.298	327.777	239.938	465.046	274.244	131.481	89.8896	170	167.419	205.24	314.371	69.4938	57.2313	212.335	51.0208	67.9396	169.467	191.248	205.419	218.177	38.325	40.8021	126.608	53.9896	32.7125	162.69	31.2875	129.871	171.76	125.242	384.244	301.304	137.269	403.683	251.365	248.735	333.933	181.063
933	142.063	227.056	454.868	466.207	197.124	142.266	261.08	654.47	287.094	371.168	447.115	1038.12	57.3537	157.189	227.419	104.371	465.538	145.52	155.488	154.346	322.2	360.204	345.934	75.8487	255.376	494.22	232.97	100.951	443.845	1090.36	579.742	244.268	141.287	147.965	164.114	134.995	441.606	31.2563	96.9887	248.986	160.979	222.141	460.125	407.996	810.319	757.004	640.999	268.119	227.243
934	103.808	214.852	41.3375	48.0725	78.4013	78.4663	101.353	87.105	86.7163	434.295	785.003	199.415	134.042	89.0138	126.298	92.99	31.2113	84.1238	60.5138	194.71	149.88	384.493	34.5463	68.8975	219.72	148.094	249.661	263.517	455.341	231.786	241.646	191.914	145.466	219.882	102.844	129.001	283.4	198.757	192.089	155.55	53.6938	216.824	493.793	297.781	596.014	328.269	506.471	595.825	175.614
935	64.65	82.3337	50.155	71.1525	90.54	78.8875	92.3962	149.395	93.4788	104.912	109.87	66.3238	83.0925	79.77	162.146	106.418	70.7412	86.9313	61.245	89.3575	74.61	109.28	72.8388	31.1563	127.427	42.0625	47.395	110.046	78.7212	50.5175	54.6675	58.3125	45.0275	108.695	36.18	89.6612	46.1175	89.285	120.574	98.7212	40.5262	179.019	200.901	240.314	193.661	224.262	290.264	125.965	85.4175
936	124.061	181.071	82.6612	91.84	121.825	82.5987	157.798	169.292	400.63	127.57	387.577	165.215	229.834	128.035	200.826	176.284	121.869	67.5975	181.599	119.433	219.537	104.996	196.385	31.1438	226.106	76.6925	86.1488	273.374	219.899	306.457	297.319	132.034	156.471	363.926	171.643	336.822	148.283	279.694	131.264	180.025	120.298	276.714	468.512	677.649	328.415	842.207	1172.4	232.227	105.82
937	219.595	247.519	165.924	142.639	174.11	139.55	209.039	187.444	226.006	425.075	836.596	471.353	162.359	133.334	252.188	31.12	83.775	77.1762	72.1238	218.521	328.014	454.165	142.59	64.1012	193.746	155.336	207.55	284.255	456.488	330.591	327.324	151.264	199.819	234.659	143.447	106.728	388.916	103.46	142.268	85.4513	78.8662	217.144	106.225	222.736	522.39	160.324	182.815	223.169	97.9537
938	171.186	96.38	31.035	53.1525	130.099	103.586	77.8337	188.529	170.704	144.322	271.478	76.7512	170.69	103.688	139.241	60.8188	84.0138	85.07	98.5575	155.061	121.499	152.218	89.445	40.86	169.75	73.2738	81.7525	146.208	153.511	125.768	183.976	89.9537	98.485	201.577	63.6313	117.821	112.419	109.025	132.374	159.473	50.5363	274.994	258.568	246.91	199.581	388.964	298.31	188.714	84.2625
939	300.081	435.195	107.426	145.534	109	78.9613	219.105	131.123	234.114	194.92	1062.66	501.326	170.623	137.989	136.572	71.265	127.393	97.53	167.678	115.945	442.904	390.096	52.4963	30.9237	242.875	231.45	196.584	378.05	418.901	594.349	321.989	243.236	234.109	304.256	236.791	213.751	254.496	181.029	124.011	407.611	136.879	329.211	321.99	1186.51	602.849	785.95	448.503	282.406	294.128
940	217.046	399.402	113.419	208.752	153.325	65.9929	163.276	103.825	223.262	161.27	225.186	297.138	223.419	130.085	239.47	340.225	48.9143	50.4917	183.946	67.8274	274.365	272.644	76.5595	30.8786	253.837	305.793	194.07	625.314	479.239	379.087	442.018	78.2167	125.66	403.151	338.473	180.163	295.911	235.37	114.47	373.001	290.949	152.076	268.487	263.994	512.262	274.232	368.235	291.704	86.731
941	131.428	532.431	30.8775	92.4638	196.794	261.704	175.058	82.2163	111.561	654.128	1436.23	540.574	234.826	322.536	322.683	234.963	101.313	217.779	64.9725	322.574	337.999	657.7	147.238	225.541	440.983	258.159	371.326	498.324	1137.65	1013.84	438.719	395.525	265.136	246.871	346.022	163.732	368.23	430.233	533.237	149.873	145.541	729.874	886.231	538.145	3188.54	487.981	932.165	1353.21	448.31
942	192.244	230.158	165.488	234.907	107.09	74.7786	172.32	89.1929	359.743	175.162	146.076	286.405	94.2512	64.3167	140.83	72.4595	48.0821	30.8595	114.508	34.6786	204.46	195.117	36.4131	33.556	100.751	148.57	99.5238	302.167	289.848	245.763	304.931	33.1833	58.4333	283.213	90.6607	58.3524	290.613	66.4155	190.463	135.668	119.71	161.358	176.429	155.97	532.736	201.325	303.174	249.214	129.296
943	265.645	66.8488	49.5738	73.7369	186.657	93.4548	49.844	101.108	197.038	65.8631	241.177	79.044	78.7738	58.7298	124.605	61.5393	88.6071	44.3595	183.381	96.9714	73.7095	92.1179	71.9643	31.7524	83.6714	33.3083	34.1548	115.33	57.9798	75.2976	144.171	56.0726	41.569	585.8	119.5	114.605	60.0798	60.6917	92.1798	65.8929	31.1131	131.17	181.967	178.805	130.608	229.162	184.131	67.219	65.3036
944	136.158	144.86	60.945	55.1362	106.345	92.2163	61.1887	79.7	72.0863	239.226	326.199	117.861	59.2625	40.49	99.5575	68.3187	50.555	55.92	52.8912	121.456	178.359	296.217	102.139	41.7037	140.696	113.906	95.165	162.109	365.613	250.004	285.51	121.044	130.08	171.542	99.615	74.39	335.544	80.5525	96.5413	99.8312	31.0487	123.555	217.308	180.955	365.91	191.549	325.733	247.145	102.804
945	179.976	196.444	143.965	104.73	139.848	155.395	271.24	157.141	315.113	187.49	388.891	240.381	169.768	88.4887	106.639	78.4737	112.669	113.285	151.636	180.404	171.106	226.982	57.91	30.8125	171.284	176.238	145.199	329.781	479.793	456.786	410.244	241.42	202.471	338.785	148.535	110.363	420.12	97.9188	44.3013	156.488	66.6238	202.259	200.36	206.179	318.925	70.0775	201.741	189.104	164.641
946	123.636	124.537	118.085	241.81	74.9137	37.5162	189.491	173.051	128.915	75.5537	79.2875	146.736	146.28	123.76	206.708	163.62	77.3287	49.1575	121.965	38.25	140.456	198.829	57.4712	31.3562	148.289	116.378	100.079	314.967	275.705	163.501	270.101	35.9825	34.7762	200.623	74.8487	57.6112	304.905	52.6262	107.603	148.533	106.714	125.4	188.76	196.086	221.072	137.476	137.725	169.739	77.7325
947	103.82	167.284	148.32	103	151.631	128.085	127.499	362.05	150.471	318.481	540.781	253.829	87.8875	65.37	114.069	77.815	57.1638	30.7538	65.87	164.289	139.79	221.548	130.678	36.5087	135.868	223.14	155.784	119.111	401.462	459.878	224.283	127.584	115.028	177.946	64.075	93.3213	448.88	47.4525	102.47	110.868	48.9588	157.589	312.84	227.109	548.506	420.84	1050.87	541.664	125.183
948	413.216	256.16	78.8512	197.84	75.7125	42.9712	137.44	69.2788	258.994	122.981	412.845	347.116	162.931	174.375	187.011	150.553	151.536	75.2138	157.296	79.6513	165.05	201.24	88.6713	30.69	179.155	102.786	124.179	325.091	332.59	217.044	224.334	119.241	138.961	159.037	176.195	87.9587	34.4125	95.4825	53.5262	264.719	94.9825	189.68	318.115	409.684	303.739	427.967	213.831	123.998	170.554
949	123.242	179.525	131.88	119.924	125.59	80.2774	200.48	230.601	132.675	235.027	576.893	128.093	131.451	66.8	191.167	85.9274	41.8405	30.6762	58.8107	128.331	185.32	208.802	73.8214	31.0631	214.383	161.382	175.601	311.424	677.204	416.361	324.813	178.504	200.238	239.651	125.321	125.694	629.686	167.187	97.6238	75.4786	76.6417	114.124	125.046	276.939	391.193	144.286	442.824	354.273	131.436
950	188.876	153.995	75.4587	134.327	134.156	30.6537	209.901	108.145	822.005	114.272	60.2825	254.8	79.8738	53.48	264.293	117.953	67.325	37.7587	149.256	36.3263	661.631	218.319	219.403	30.74	200.755	557.391	314.269	343.277	836.856	944.059	207.726	54.6388	37.12	343.717	362.082	191.239	512.105	126.919	161.079	141.676	556.179	204.621	338.781	454.158	207.481	815.726	859.393	396.506	116.295
951	214.211	225.63	80.7845	139.648	63.1583	80.1369	205.913	188.02	237.587	195.424	393.617	220.431	155.537	114.579	124.938	67.5607	135.001	117.273	112.405	121.65	204.089	302.012	69.7274	30.5226	157.274	178.725	141.954	204.327	404.773	357.438	394.023	181.076	159.665	237.618	182.742	118.211	307.995	73.8071	85.0917	207.758	89.1202	351.261	436.537	424.761	425.685	370.171	210.036	202.992	214.862
952	122.849	148.826	72.4226	113.489	169.32	160.087	113.419	255.306	230.898	162.687	331.318	174.663	176.204	105.277	203.006	124.667	108.655	119.25	199.29	131.47	124.899	190.075	124.894	30.5071	286.281	116.983	135.058	313.198	318.033	293.905	354.306	262.071	213.221	403.632	163.781	235.874	261.246	214.142	229.888	171.332	85.6821	372.227	667.587	460.782	549.005	448.635	415.361	369.521	180.357
953	98.605	346.57	82.33	107.661	70.4788	32.3513	176.507	79.0413	168.618	112.318	761.087	327.476	129.69	38.1375	128.524	34.53	69.415	48.3787	93.3037	75.705	173.029	156.166	49.0863	30.4625	149.835	422.426	189.697	253.095	360.103	363.956	163.98	303.914	251.94	265.027	229.843	184.749	401.886	81.515	59.135	287.637	117.956	277.719	564.361	572.32	402.466	1028.7	418.091	294.016	240.658
954	244.132	473.004	117.878	218.546	118.689	92.3175	339.983	286.274	448.599	292.688	733.717	737.706	182.259	131.931	179.558	73.7237	276.494	367.873	167.704	153.27	582.521	512.107	99.6612	71.8588	186.287	238.811	268.739	309.47	587.4	773.315	411.496	283.766	238.065	270.361	254.274	230.214	284.98	181.96	67.8863	229.131	126.723	194.143	259.226	377.491	852.184	203.005	360.43	250.64	255.409
955	168.398	157.844	198.849	157.76	65.8113	76.4287	122.556	81.6575	39.6013	98.13	91.8962	84.8325	110.545	108.499	176.661	118.728	46.6	82.4638	89.375	60.5925	138.479	205.576	72.4075	34.6488	178.171	92.4513	140.48	309.558	196.939	176.276	417.946	30.3612	40.6763	244.419	72.3563	70.2188	113.388	36.475	206.276	206.604	215.05	196.505	154.171	114.728	389.897	179.938	199.836	141.773	184.966
956	247.193	386.576	100.234	167.745	111.734	83.0313	189.941	139.417	200.085	163.063	860.444	444.944	117.055	106.775	111.415	66.6475	108.571	142.933	97.3675	100.884	165.461	342.819	34.2413	30.3125	184.024	240.375	195.411	281.881	391.808	438.335	213.985	252.975	219.327	244.849	191.066	185.279	330.777	103.316	115.281	291.926	100.406	406.971	832.089	616.719	629.04	790.871	521.134	379.341	334.806
957	218.879	397.88	30.265	165.863	666.095	197.482	589.901	304.946	618.664	1098.74	759.996	493.414	459.995	255.542	490.918	359.434	252.201	319.7	158.595	463.994	643.951	633.146	312.553	275.608	923.831	275.654	493.47	556.443	1039.76	1561.81	186.262	414.266	361.195	438.05	218.274	615.117	683.058	351.174	507.205	150.225	118.714	488.318	143.504	1420.68	1435.47	246.724	592.668	1293.32	157.995
958	81.7675	117.21	48.6638	59.6863	175.309	125.885	164.102	162.193	241.969	233.463	739.249	242	175.385	88.125	222.84	157.746	118.939	76.6538	161.086	133.005	139.685	121.575	160.409	45.925	392.606	127.7	139.181	272.525	233.969	136.676	149.634	245.387	589	487.265	79.0362	339.8	255.879	360.526	112.991	251.808	107.981	317.745	334.16	427.108	323.652	540.041	943.128	242.023	119.621
959	159.806	249.753	30.2125	97.7625	188.024	137.602	172.1	215.725	772.391	273.271	469.2	202.693	331.674	198.586	385.004	137.754	237.411	144.371	253.78	203.54	269.809	206.481	273.35	35.5175	373.584	116.019	157.315	385.288	284.715	383.728	413.63	207.726	241.269	405.321	191.843	405.625	200.887	435.391	174.435	339.921	114.57	323.284	690.938	841.15	576.607	1090.77	1011.59	317.294	109.009
960	213.315	349.359	71.1363	141.371	118.889	43.53	143.637	90.2837	363.48	164.257	761.533	423.875	106.794	83.73	194.086	97.0225	104.927	101.274	229.583	136.271	246.946	184.861	65.0775	30.1938	196.684	204.995	180.091	356.805	355.021	300.519	192.533	254.648	186.836	206.151	158.352	120.695	252.469	149.417	145.229	329.585	91.73	230.403	759.11	697.86	467.326	750.759	479.163	291.368	254.339
961	116.594	84.106	107.821	107.318	110.144	119.608	57.7774	124.851	159.27	186.119	199.761	175.361	141.562	174.042	133.66	88.5345	141.461	94.2357	97.3405	113.164	114.177	175.529	105.89	30.1583	236.363	37.4417	39.0881	77.7083	97.5595	109.489	95.581	72.5393	45.2321	184.35	46.3845	116.169	36.1988	73.1976	126.856	90.0583	31.8345	229.544	257.248	295.914	318.051	333.026	382.62	158.437	80.0452
962	151.164	239.82	81.6988	115.743	178.706	127.175	177.494	223.533	614.861	282.819	515.695	210.813	234.555	161.714	264.821	138.926	80.7825	262.57	218.289	193.664	204.477	215.618	166.28	30.1213	237.262	130.529	134.696	263.908	171.401	384.985	336.174	225.549	158.605	224.713	193.145	337.124	177.546	290.404	112.239	119.693	93.5863	163.9	255.509	229.923	212.586	528.241	408.971	132.006	103.571
963	468.048	565.322	136.786	369.632	763.288	294.564	465.24	698.689	250.894	1867.24	1426.82	390.425	342.025	485.336	368.614	360.07	100.403	283.774	258.871	612.095	1337.33	766.097	139.369	197.035	567.911	339.384	749.48	548.809	1679.45	2231.12	444.216	279.68	223.719	386.34	263.947	481.149	1408.37	709.783	225.129	129.973	86.9775	251.665	249.899	3756.68	652.729	334.945	1872.24	1193.43	76.14
964	238.893	245.635	124.633	156.469	142.51	30.0012	381.524	111.08	1170.78	132.733	1415.2	239.156	164.526	110.562	141.367	143.345	157.642	72.0702	322.632	78.8893	501.774	208.336	170.463	30.6821	217.299	553.964	230.154	952.442	691.819	826.571	262.644	203.792	301.511	502.238	306.624	318.53	384.144	274.048	55.094	476.898	149.842	179.464	345.345	1115.42	316.245	900.688	459.382	110.8	131.232
965	105.478	141.313	59.22	61.8537	157.146	101.47	117.319	153.931	110.931	161.423	352.02	152.839	196.41	103.813	219.378	41.7837	113.284	79.8937	143.311	105.411	81.9437	149.694	144.303	29.9638	244.213	128.349	118.93	203.879	211.055	255.565	283.647	208.461	158.003	259.728	125.393	358.155	176.757	233.835	187.041	290.336	145.456	363.118	392.801	418.899	413.895	719.254	377.891	238.792	148.77
966	110.439	181.257	125.401	174.285	98.2712	72.075	128.865	82.09	229.643	165.844	185.523	251.545	110	90.325	153.201	133.223	80.6213	47.55	132.906	56.4763	165.364	178.415	57.1187	29.9363	166.494	129.456	108.966	270.202	314.822	197.088	204.901	48.9412	57.4363	182.815	108.36	58.1425	282.935	69.5962	49.2825	133.199	131.549	170.333	162.438	179.495	145.875	245.851	145.291	307.17	45.1488
967	138.027	213.479	107.035	29.8673	151.65	97.8192	100.312	177.335	68.1096	266.735	539.383	178.342	215.412	108.098	255.698	91.8769	89.9365	78.3327	92.1192	144.387	239.642	486.587	104.746	33.0135	94.6673	133.731	130.346	182.537	329.283	237.375	330.138	128.913	148.438	202.844	112.458	123.669	169.638	111.213	109.506	30.9558	70.3192	228.075	402.506	373.794	541.219	440.063	358.998	442.563	231.248
968	61.7338	71.1225	56.0775	56.425	57.4525	77.0238	68.3125	87.9788	102.646	100.334	123.911	80.21	70.8925	52.4312	102.999	68.5487	57.9888	47.14	65.4775	68.2925	85.1	90.2813	67.8637	29.855	117.734	43.86	52.9637	130.811	117.945	99.055	149.931	74.2987	76.9813	151.162	43.935	92.9925	69.4638	89.4313	91.2463	98.0263	38.0388	193.619	196.558	200.482	211.762	307.253	283.601	155.188	59.3837
969	144.574	215.861	115.625	70.4412	73.165	71.6538	142.32	95.355	158.843	161.215	543.676	318.97	111.701	64.2525	134.149	29.8163	73.8413	111.568	61.09	81.1612	179.745	276.135	67.2813	33.1713	195.44	171.525	117.848	177.253	304.563	348.558	246.69	156.679	149.798	193.941	94.2262	100.93	331.735	83.695	76.965	295.494	65.9163	274.886	382.691	781.451	464.486	546.716	421.761	221.615	213.602
970	155.468	245.155	171.336	290.011	103.213	39.1538	199.833	479.858	220.504	87.695	47.495	155.28	300.788	288.086	494.899	399.045	55.0375	59.945	89.41	34.66	305.619	322.125	65.5062	29.8075	325.56	164.935	118.453	307.341	268.865	251.21	434.814	88.7475	97.1925	162.999	132.571	97.7638	350.897	152.565	111.58	188.444	207.356	148.671	265.804	188.346	376.033	280.419	286.019	218.92	106.147
971	97.1713	124.001	33.3088	67.7188	214.716	121.475	75.4463	155.134	241.071	200.673	253.99	195.468	120.757	101.49	172.428	123.843	76.19	68.3263	159.644	122.464	107.509	111.894	70.8775	29.7413	206.194	75.66	106.504	231.24	168.18	182.423	324.589	215.292	162.678	203.69	152.274	332.174	76.975	313.21	162.811	161.04	87.3875	246.674	555.609	345.5	355.606	520.375	513.813	212.561	93.7375
972	157.485	199.714	112.466	133.486	83.71	67.1412	135.625	174.426	122.881	120.52	247.079	261.873	84.06	79.7875	114.016	67.8525	67.4313	72.8462	103.579	102.632	149.528	192.215	60.8175	29.63	151.124	87.6312	90.515	99.1425	326.386	264.946	233.26	132.938	121.235	166.491	115.865	52.1887	257.799	40.125	93.6688	119.784	56.4375	207.099	486.746	333.4	455.046	440.288	273.757	248.601	149.537
973	82.9137	96.7075	29.63	69.875	72.5275	43.1013	104.948	153.548	384.845	107.948	279.236	139.249	141.506	66.8775	196.68	95.2237	72.685	74.7913	133.78	79.0463	214.193	87.375	255.016	30.325	330.316	127.226	75.6713	383.601	177.855	275.795	215.173	163.325	173.796	356.321	198.021	424.503	78.1125	284.842	121.488	285.239	80.3275	225.755	501.473	818.614	367.118	1015.76	909.285	280.957	93.63
974	139.373	321.585	135.783	284.969	204.76	68.5313	230.854	143.349	285.259	172.561	230.696	359.163	183.984	150.834	381.311	150.631	61.7512	77.9262	126.498	55.0988	261.753	351.989	113.113	29.595	302.425	251.236	260.512	296.625	393.378	394.504	328.809	68.5962	84.3012	288.76	270.294	217.709	447.31	109.035	117.939	238.819	312.631	339.233	462.212	175.544	658.105	322.923	299.791	465.711	272.136
975	215.744	776.549	59.5075	147.25	283.131	173.545	220.184	258.783	196.129	742.318	2190.24	464.446	608.255	419.489	364.679	787.676	170.658	300.27	144.982	460.217	605.596	790.961	517.975	198.576	265.392	601.128	512.518	787.443	1678.58	1187.08	432.027	286.158	112.694	372.121	275.707	167.76	822.086	353.661	115.131	66.4325	60.395	120.495	348.026	1006.12	1156.85	333.878	295.021	757.281	119.588
976	146.969	103.408	496.331	80.6917	101.581	67.8611	108.972	231.372	66.4722	163.5	279.658	68.1778	135.011	107.686	209.189	88.8167	32.5917	45.6222	69.0389	83.8389	188.917	372.933	68.8556	32.2667	179.972	131.458	100.469	111.992	377.325	213.136	302.625	76.225	142.556	130.714	156.325	65.7333	193.847	79.7778	97.0944	29.5861	102.653	177.453	269.5	407.222	482.636	452.261	400.156	412.575	224.456
977	66.9274	199.808	36.9321	48.7702	56.3024	64.4024	57.5595	39.4893	38.9583	180.658	352.189	93.5881	102.069	43.4131	144.605	35.9238	29.5738	41.8905	45.7381	92.1488	153.485	197.069	35.1869	39.2071	158.575	121.795	131.831	180.907	224.264	105.288	167.607	107.738	108.693	197.318	63.3726	63.0298	165.471	110.502	99.8333	149.907	67.9048	238.621	293.073	258.318	504.251	331.373	404.331	473.927	164.732
978	209.961	359.038	29.5613	79.255	287.161	62.3387	154.68	83.2775	125.495	377.022	627.305	169.947	329.211	226.855	184.12	457.223	78.02	133.59	119.41	187.045	373.996	401.494	232.768	86.375	243.827	451.775	438.009	375.75	856.435	622.529	307.97	438.225	286.255	336.825	182.976	394.886	532.489	626.301	193.481	338.329	115.414	109.226	655.154	1120.44	766.212	1162.43	736.424	313.906	247.365
979	322.507	227.145	145.231	137.973	90.9412	86.6412	264.616	123.34	430.28	125.673	565.945	285.529	82.5475	119.908	156.259	119.129	104.896	64.4788	140.981	106.333	223.129	196.684	81.385	29.5012	245.025	164.086	184.218	434.886	562.076	420.524	386.59	193.916	262.556	270.424	213.474	143.445	426.342	174.844	48.2888	272.951	55.7175	104.339	336.601	665.045	427.58	470.795	254.235	88.5113	116.745
980	167.004	188.303	150.124	158.245	157.334	127.677	129.024	209.584	147.218	147.425	252.999	134.016	157.366	132.379	346.081	162.281	52.4675	102.744	104.494	126.769	184.75	244.658	150.327	52.2813	66.3187	34.0863	29.4688	90.7025	83.3975	103.363	67.8475	42.24	32.2675	93.0662	49.555	65.5837	85.1175	47.3462	73.3588	87.0938	42.53	111.153	186.149	202.929	108.353	107.823	292.98	116.596	60.2563
981	122.139	315.788	29.4288	127.674	165.37	185.375	175.825	247.71	327.6	294.066	482.774	292.491	241.975	248.629	361.733	369.538	103.411	232.346	180.725	259.493	273.229	239.314	159.23	69.165	384.967	114.714	91.9363	260.445	212.346	291.14	174.371	131.984	313.087	219.254	153.031	265.691	157.412	270.829	193.785	257.249	143.806	411.535	620.706	627.166	447.173	818.404	1065.95	289.818	213.971
982	220.071	292.965	65.631	94.2952	67.5929	62.0095	175.517	110.492	314.43	111.904	722.011	341.894	114.41	80.35	112.689	43.6405	163.276	149.102	122.381	72.5238	323.64	266.187	57.1	29.4214	181.774	114.746	186.108	267.421	415.376	513.012	267.832	317.943	171.008	230.586	254.335	240.446	191.7	126.42	87.581	295.626	108.8	198.708	410.6	839.058	355.136	564.444	358.582	193.927	228.081
983	134.363	137.43	44.2362	91	90.9925	143.284	117.26	235.879	407.404	147.904	388.675	176.232	95.375	129.104	242.683	269.716	99.8838	95.6287	162.724	206.345	167.546	133.273	159.68	29.42	222.558	80.5362	77.4025	207.447	146.954	290.13	154.857	53.0787	127.194	196.558	99.0263	294.73	121.815	257.988	106.18	239.803	62.3375	252.794	376.35	833.546	351.82	728.264	727.925	238.516	75.5187
984	134.685	233.175	55.4575	100.301	65.6737	33.5363	149.25	169.47	38.2875	130.019	202.43	72.2763	157.839	118.146	309.864	137.423	56.3125	36.6737	36.6925	39.5325	236.446	305.212	69.97	29.3525	72.2475	159.411	163.898	203.278	341.739	208.115	148.906	134.423	80.6475	127.116	129.276	129.101	119.086	145.579	70.04	190.564	42.875	59.7375	174.683	186.428	237.646	220.871	271.884	141.796	88.315
985	139.989	69.7161	142.961	103.186	137.313	157.027	78.4268	85.4589	115.155	96.1661	269.027	133.357	128.139	93.7964	213.664	151.907	112.873	128.529	162.829	235.509	57.3036	120.611	53.1268	29.3518	326.511	72.2679	63.1893	178.121	232.421	239.593	248.4	125.287	121.938	167.482	105.02	94.2804	201.946	135.384	273.166	170.186	98.0946	311.111	419.627	328.255	523.521	502.971	438.846	274.989	192.339
986	43.281	217.86	67.4476	119.669	113.394	260.138	103.571	248.701	122.407	341.143	477.867	389.2	149.165	163.49	303.688	125.843	56.2726	80.7869	64.0964	272.1	29.2917	124.632	123.029	45.7488	525.298	97.2548	132.744	369.185	265.205	424.639	385.018	313.531	431.831	512.633	139.802	273.364	151.106	413.552	334.943	339.068	201.539	699.343	1289.95	613.607	630.242	802.737	508.606	640.387	171.242
987	166.137	246.158	307.667	275.833	179.1	106.188	300.229	135.471	286.796	161.192	186.221	379.663	161.329	92.3208	339.563	133.054	104.938	29.2417	94.025	73.25	107.517	223.396	183.45	43.7167	232.871	234.167	144.633	181.417	626.467	351.1	815.871	142.979	71.3	330.142	154.279	148.762	697.846	163.779	220.963	146.817	288.558	184.496	346.875	230.733	721.521	385.637	477.558	321.004	171.412
988	457.285	597.705	99.505	394.615	59.7875	92.3162	373.695	443.64	721.8	479.886	75.1388	361.526	400.831	499.765	826.124	1364.99	650.26	254.394	65.0775	185.879	1004.38	1388.91	67.605	77.5637	629.485	123.715	1184.71	449.2	510.669	2017.81	86.695	215.998	161.821	429.558	449.12	192.898	182.658	29.1812	702.329	342.836	816.99	296.582	466.496	304.058	567.928	173.326	169.176	321.59	396.706
989	115.405	215.504	63.8775	53.445	260.055	65.68	153.201	95.5387	227.874	311.95	1320.94	170.77	260.521	149.369	80.9513	29.18	128.37	64.665	193.533	175.449	231.226	316.195	375.266	53.1238	204.355	344.266	338.575	941.681	1699.32	976.42	466.39	276.505	149.403	506.845	354.696	249.205	440.75	311.994	189.634	555.18	212.729	140.151	352.575	639.421	566.305	595.035	893.805	367.656	232.484
990	154.961	241.52	86.5225	139.271	93.6538	47.68	100.935	75.8	396.344	114.635	121.701	173.753	86.835	86.3487	162.885	121.958	43.3125	61.6737	91.73	83.3238	120.509	195.958	54.5063	29.1638	197.338	212.423	158.806	301.423	408.533	264.294	383.091	69.6963	58.6662	318.428	145.423	100.321	341.461	125.341	192.088	211.609	153.016	200.846	356.566	238.881	449.395	285.724	557.849	404.863	141.629
991	169.979	156.662	50.7042	134.654	87.0042	40.7792	110.479	46.0333	134.596	47.8708	97.2042	143.908	54.2292	79.8792	149.529	149.662	31.7583	42.2375	66.3792	68.8083	151.746	196.671	29.15	43.2958	170.321	77.8708	107.421	257.029	295.371	156.146	289.067	47.8917	44.9542	177.004	99.1167	50.0333	225.442	68.3208	135.758	189.446	115.333	165.475	243.225	98.6625	354.371	199.408	183.217	176.729	140.908
992	376.886	816.455	100.291	248.994	277.616	54.9038	261.376	54.6662	1612.71	136.137	380.38	512.197	419.58	162.989	298.089	576.811	203.208	53.1013	295.501	61.4162	696.84	276.575	286.839	29.1313	528.129	929.332	393.41	1610.83	1400.19	889.739	898.455	215.831	248.831	821.715	647.521	535.528	600.445	541.842	137.766	677.986	638.784	200.863	363.408	774.901	726.361	926.36	973.975	477.69	101.993
993	273.305	1965.88	673.955	433.886	274.911	414.467	225.836	384.276	195.39	522.967	1090.61	2787.07	238.053	278.554	229.899	76.2938	179.56	82.13	106.86	404.767	157.455	731.005	29.1088	33.2762	68.65	196.696	336.985	254.333	483.804	641.556	1202.87	1041.76	186.154	796.569	405.945	220.299	211.011	59.5037	479.772	523.701	312.609	1881.06	3523.4	1192.1	1661.66	980.784	301.701	1862.81	1778.83
994	261.092	160.736	114.652	148.785	232.267	91.2107	185.396	162.962	316.544	189.196	833.119	285.723	336.761	240.027	368.015	167.761	165.208	85.8262	205.313	148.723	208.619	215.955	118.514	29.1	820.806	199.536	159.327	634.001	512.549	576.471	667.282	213.249	485.594	484.764	194.806	451.957	313.142	590.968	172.596	534.85	93.6119	226.157	456.942	1038.69	507.083	881.299	901.315	189.319	102.448
995	90.0571	89.9369	98.0071	95.256	58.2405	67.9893	109.82	84.7774	52.8786	67.9226	117.67	73.4845	146.249	92.7631	140.817	56.7631	44.9631	49.0655	29.0726	71.1036	155.674	96.2988	40.3012	36.1917	72.5155	72.3786	60.9833	85.8905	211.756	142.076	154.156	95.819	73.3476	124.015	76.3869	50.8036	81.7798	29.4667	32.3131	83.2274	32.9821	105.305	148.749	187.08	157.481	186.944	122.704	69.9357	58.6726
996	111.933	285.747	234.612	76.8033	109.632	71.535	187.335	115.942	78.6717	126.883	568.922	395.807	146.253	106.987	140.533	60.34	102.552	33.8817	63.3483	146.405	105.563	246.068	51.615	29.0617	149.845	120.34	133.997	132.533	273.23	370.923	309.313	257.775	106.798	215.83	76.74	91.8483	207.378	37.6433	172.597	259.835	106.465	339.713	680.192	478.725	263.858	349.1	503.633	388.235	428.203
997	92.3625	239.217	154.825	248.535	193.229	59.6729	115.385	88.2583	198.662	87.0333	50.2792	396.554	155.963	156.146	218.4	158.525	41.525	41.9688	87.8271	29.05	191.917	209.11	45.6167	61.5604	84.1083	101.281	116.45	224.781	233.931	179.633	202.273	41.1083	74.7687	172.521	112.029	106.513	111.671	65.7188	100.498	109.935	119.273	104.283	334.379	185.371	326.135	210.904	188.879	401.925	96.6896
998	192.076	276.794	138.119	224.125	104.6	42.63	157.636	80.8675	395.693	200.813	580.329	507.31	156.131	126.22	85.49	88.3662	194.917	138.753	251.818	127.965	240.214	231.563	151.528	45.755	204.22	241.632	229.042	338.804	378.228	338.533	407.601	254.174	93.7475	207.664	334.02	129.84	208.085	108.974	37.9738	379.267	94.5275	189.144	413.489	289.621	359.248	288.671	246.95	74.515	161.379
999	85.6713	141.916	81.7987	89.735	110.063	99.5187	135.26	79.7037	121.024	224.697	366.976	124.268	104.993	47.84	118.868	42.0913	48.4988	29.0162	48.0388	115.274	121.56	149.326	53.6287	31.63	115.668	105.338	99.28	146.973	275.429	202.426	155.526	94.5463	97.9613	147.941	65.1475	56.48	163.193	79.69	117.306	97.235	43.275	138.29	158.595	139.086	231.881	193.193	232.128	241.701	104.82
1000	280.279	292.808	176.27	187.274	148.262	189.846	477.624	238.343	664.05	288.006	607.574	424.955	63.485	83.65	124.088	65.5487	86.9163	30.5012	210.864	276.221	297.264	267.914	66.7412	28.9387	176.059	154.378	147.088	288.04	393.331	392.478	189.209	222.174	195.119	307.045	152.349	122.78	453.206	106.043	76.1863	125.355	72.28	207.594	338.744	331.163	270.644	420.395	179.234	211.963	152.393
1001	217.021	389.014	54.2929	187.729	85.2393	65.8286	130.493	60.4607	319.971	154.386	130.011	255.679	132.836	99.4607	159.336	193.964	58.8071	63.825	127.179	62.5393	253.679	261.479	28.9286	32.6786	275.725	116.5	113.518	325.864	355.304	196.432	329.204	43.0536	63.1893	345.089	106.054	61.9714	298.386	80.7607	265.939	219.754	150.557	266.714	312.046	330.243	481.146	256.946	397.575	312.004	262.193
1002	631.33	858.513	43.3125	392.706	879.097	79.695	402.478	28.9063	3006.73	193.37	997.183	366.337	498.505	236.23	456.32	795.385	285.503	83.9363	734.957	87.4825	1165.41	310.79	409.293	48.8175	618.425	1192.58	420.604	1696.08	1515.46	729.556	379.596	189.506	326.88	1223.75	684.914	653.462	885.71	742.653	228.072	803.947	885.675	439.435	506.276	1181.5	808.51	1275.54	1742.79	422.194	75.3975
1003	179.248	258.759	83.3455	126.011	104.309	113.58	123.995	146.814	103.598	219.598	441.289	125.377	182.25	105.664	239.623	80.4364	45.8205	55.9818	94.8045	133.718	227.82	363.702	39.1432	28.9	104.384	101.161	94.575	148.455	321.639	234.525	318.389	114.307	107.227	186.166	83.0182	53.6091	267.123	50.7841	144.123	173.064	77.6068	244.359	454.2	257.436	456.011	367.205	368.666	386.47	296.052
1004	89.8812	208.035	51.4575	111.771	103.709	109.25	83.2225	120.238	42.4075	670.663	412.358	305.272	158.705	154.158	107.988	148.116	28.8837	87.5613	66.5837	112.231	143.825	234.382	62.6063	37.6625	138.75	110.729	176.119	140.984	373.842	341.114	141.211	123.636	181.975	181.833	135.036	143.684	247.916	89.355	325.825	153.236	56	437.535	610.165	1093.02	1559.09	497.957	672.066	967.054	891.049
1005	220.579	190.001	28.86	112.465	375.469	217.475	84.6963	225.72	353.809	353.769	607.104	338.614	295.576	212.947	273.699	92.3462	147.781	172.465	255.714	299.022	197.429	235.436	305.223	106.255	323.639	160.311	129.564	339.76	112.588	294.771	383.725	188.77	187.31	299.693	171.856	294.842	165.489	234.821	279.001	235.681	124.66	517.786	408.248	491.139	359.031	630.107	483.936	330.592	103.289
1006	123.394	277.712	270.255	329.744	122.785	73.2	149.661	156.346	180.784	172.577	92.6312	358.087	174.958	152.926	271.901	170.257	56.7163	62.7212	116.726	85.1475	111.088	493.818	75.6213	28.8575	69.3637	107.155	129.735	214.669	341.719	133.294	554.413	129.251	50.725	148.224	165.24	57.6887	227.908	35.2037	127.869	360.384	218.466	210.359	351.975	76.6425	448.084	134.086	118.989	348.546	42.6737
1007	213.468	147.009	70.225	165.149	182.838	300.744	142.705	269.158	393.816	533.131	902.564	289.009	211.506	240.344	287.344	28.855	93.0863	270.28	307.944	345.554	96.9762	269.642	124.27	53.1488	370.868	90.4762	115.916	726.563	172.299	148.695	115.843	394.449	309.738	288.155	165.285	111.287	131.941	80.76	288.353	71.7062	111.366	576.329	1113.17	507.283	934.926	741.38	1158.71	934.616	195.658
1008	84.3	133.173	204.55	181.934	78.8929	50.4714	130.043	111.355	61.5089	72.075	184.775	199.807	325.502	258.666	214.238	148.116	48.4804	75.1268	76.3071	89.8768	182.548	164.509	31.6286	28.8464	167.039	95.6786	112.282	226.741	193.936	268.887	273.83	171.243	133.054	237.311	169.127	97.0536	247.177	80.2571	61.4357	80.3339	48.6839	202.3	342.091	263.938	236.563	265.807	205.58	195.637	126.054
1009	111.741	137.854	101.388	36.9738	70.9513	54.945	69.5187	91.3825	52.4575	248.415	372	140.843	70.845	52.6812	100.444	70.6612	28.8275	48.8375	46.875	53.3588	176.003	236.65	61.1575	31.265	131.848	97.8175	92.665	211.042	257.4	168.75	242.107	119.809	107.024	131.139	79.8725	83.1988	201.106	91.1188	158.529	181.095	69.28	183.925	357.724	173.67	389.576	444.294	424.405	345.038	246.799
1010	200.702	379.066	150.408	550.476	235.183	153.158	288.098	390.92	150.974	426.962	83.6637	296.548	168.194	98.745	535.324	239.153	48.3738	89.9575	127.751	160.006	297.11	281.771	28.8225	97.8662	515.832	250.47	274.026	253.42	332.665	175.936	346.725	83.0025	111.464	176.186	159.486	81.745	455.871	132.378	272.858	220.357	241.458	526.545	649.023	151.384	589.58	253.631	200.26	929.702	123.351
1011	189.873	499.3	28.7437	321.561	132.031	71.16	269.147	96.8175	137.72	287.529	103.091	238.719	288.915	222.713	203.891	290.289	87.2113	168.348	153.084	112.276	433.049	425.371	83.7562	58.0613	162.368	289.75	400.454	449.676	507.99	691.372	496.077	86.8075	186.637	574.911	180.618	336.506	610.339	184.904	464.56	221.706	276.169	491.184	608.695	493.636	780.774	441.603	799.206	830.464	323.142
1012	96.835	259.952	28.7375	35.1713	155.784	89.4488	91.9425	92.6563	250.525	362.4	524.313	268.11	164.221	118.574	117.156	71.815	49.53	47.1938	74.135	172.17	200.139	298.531	97.05	39.8837	164.459	457.08	225.776	160.014	536.856	449.909	263.295	366.449	123.458	311.784	76.8912	151.52	490.431	228.074	272.636	342.074	91.2913	243.484	588.739	511.275	602.082	469.443	763.476	663.611	221.99
1013	153.389	314.568	55.8375	127.789	112.453	69.285	217.81	86.53	143.915	93.4762	619.568	533.246	100.575	65.0487	110.06	52.9663	101.334	91.7338	107.005	72.7288	263.024	198.882	56.81	28.7213	142.678	232.164	195.185	253.094	296.429	523.424	192.119	237.929	266.959	199.415	229.37	180.51	133.266	137.548	57.6225	226.885	70.1112	250.381	740.372	563.439	662.617	477.16	188.223	256.204	277.805
1014	65.905	121.056	28.6663	102.429	153.51	119.44	110.19	159.87	595.89	225.301	1388.08	271.603	122.825	94.8238	255.666	128.025	85.1238	97.24	197.298	180.434	98.365	109.143	574.669	54.2163	349.217	185.438	104.698	486.136	219.621	250.511	276.585	270.369	272.321	322.821	223.385	273.473	201.226	488.364	228.655	435.066	186.421	369.291	593.804	617.947	456.831	940.355	698.449	333.279	151.279
1015	139.151	252.516	112.988	220.626	87.535	37.0675	119.418	65.1675	180.47	112.344	114.259	294.211	168.284	145.73	176.189	174.616	51.4838	71.1213	135.189	53.6025	166.924	297.684	28.5012	31.9537	198.158	169.686	227.954	352.631	281.938	221.305	308.489	62.7013	111.951	293.387	224.309	93.7788	253.613	93.8787	134.97	377.454	246.551	188.286	318.689	77.905	382.869	160.834	295.849	305.101	121.239
1016	54.1213	78.64	68.3	55.9338	90.4387	84.5575	57.0925	109.916	96.9025	132.01	166.335	135.132	77.7288	74.135	135.434	73.9625	72.5962	58.46	78.3812	96.8125	102.595	368.576	159.07	28.4875	155.813	53.5613	66.1025	127.833	133.764	170.048	200.385	99.285	85.1675	165.227	56.5712	108.412	118.304	71.6175	93.5138	134.262	36.29	181.17	68.9125	174.116	153.324	184.896	261.926	29.1363	71.4988
1017	137.061	138.832	159.333	278.426	95.5167	46.7857	131.851	157.738	118.511	127.619	77.2964	164.936	135.09	156.558	195.546	105.53	44.9214	44.8167	75.2369	50.175	160.019	207.946	35.375	28.4452	216.238	83.8869	75.5321	224.683	254.185	172.535	247.74	33.0738	35.2821	169.473	71.4381	44.1298	249.032	42.7321	77.1571	128.671	100.011	140.39	172.948	106.848	306.79	176.254	163.563	130.152	80.5238
1018	175.739	274.497	125.536	343.394	109.158	110.925	202.108	122.053	193.781	218.164	210.831	375.786	141.064	85.8861	61.1083	74.3222	94.9333	90.7306	138.731	67.1917	170.581	292.411	58.8972	28.425	258.314	162.033	174.5	554.669	532.7	316.528	538.878	44.8389	105.133	419.725	176.153	130.881	552.192	93.4333	474.203	357.283	248.458	445.806	414.964	216.125	723.706	248.486	550.422	374.394	227.781
1019	62.8952	100.596	37.7417	76.006	86.0929	99.7798	66.1476	99.6917	143.033	206.236	183.11	164.756	92.7929	75.3131	154.795	55.0679	66.225	89.0238	121.97	129.595	99.0583	126.445	258.902	28.4214	284.532	70.0393	85.1393	130.882	117.529	177.408	230.205	125.637	161.195	276.327	83.5583	211.925	82.906	147.311	164.571	194.689	71.0345	185.84	333.79	448.054	311.004	332.819	402.481	167.286	99.656
[truncated: 981 more rows]
[truncated: 13 more columns]
