# Supplementary material for: A Wrapper Feature Subset Selection Method Based on Randomized Search and Multilayer Structure
Source: Biomed Res Int. 2019 Nov 4;2019:9864213. doi: 10.1155/2019/9864213 (PMC6885241; doi:10.1155/2019/9864213)
Supplement: Supplementary Materials — Public datasets: details of five public datasets (had been described in Table 3 in the paper) which are the important datasets for classification with our methods and other comparative methods. Supplymentary Tables 1 and 2: description of two algorithms (LVW and Imp-LVW) which were compared with our method in Section 3.2. [file 9864213.f1.zip › 9864213.f1/public datasets/hepato.csv]

ID	1	1	1	1	1	1	1	1	1	1	1	1	1	1	1	1	1	1	1	1	2	2	2	2	2	2	2	2	2	2	2	2	2	2	2	2	2	2	2	2	2	2	2	2	2	2	2	2	2
1	19.3	12.5	9.7	9.3	42.3	-8.5	54.7	22.4	104.2	470.9	301.7	446.7	6.4	-5.8	31.4	12.8	578	82.9	88.5	144.1	16.7	27.4	30	16.2	-35.1	-9.9	12.3	-6	43.2	77.8	30.8	36.7	35.1	19.8	44.5	7.9	24.5	27.7	38.9	5	18.6	-25	19.4	40.3	48.1	28.3	45.3	372.9	145.2
2	23.9	-54	6.4	28.9	-0.8	13.8	29.8	7.3	17.7	501.7	240.7	335	28.4	-23.9	57.6	16.3	443.8	67	92.4	128.7	1.8	-3.3	-7.8	-48.9	-24.5	-7.8	14	-13.6	-60.4	-115.2	15.7	23.7	-6.7	-62.1	99.5	-54.2	-33.2	7.4	-42.3	-7.9	-50.5	-111.1	-31.3	10.1	-57.4	15.5	-29.2	255.9	145.4
3	79.9	40.1	-26.6	15.1	14.2	-5.2	92.5	-1.3	147.6	284.8	93.8	177.3	-10.6	13.2	7.5	-1.9	233	28.4	51.9	71.4	14.1	78.6	31.5	32.7	49.3	29	17.6	8.7	9.2	85	45.4	-12.1	8	-12	32	1.3	-45.5	-35.3	-25.4	16.5	-44.7	6	-10.4	7.6	39.7	-21.4	-11.3	202.7	80.8
4	396.8	333.6	160.2	170.9	383.9	271.3	318.3	284.2	487	948.6	691	963.5	239.4	192.9	335.9	183.3	995.1	239.5	281.1	338.1	219.1	254.2	197.7	179.8	292.3	290.6	192.1	221.3	274.6	408.5	538.4	397	495.3	292.3	657.1	310.7	321.1	342.7	386.9	303.9	196.2	306.1	334.4	454.7	369	345.1	262	792.3	392.8
5	281.2	235.9	60.8	80	329.1	166.8	193.5	277.4	462.3	973.4	627.2	818.1	170.7	74.4	236.8	217.1	1024	180.7	265.4	366	161.4	213.6	68.3	148.9	283.2	284.5	152.6	116.1	204	220.8	543	325	368.2	161	533.7	299.3	243.3	282.2	290.2	293.7	145	179.5	213.9	489	288.6	345.4	188.2	700	357.9
6	114.9	33.5	13.8	20.7	138.2	90.9	12.1	112.3	168.5	1539	1048.4	1557.5	70.5	8.1	128.5	113.2	1716.5	363.5	478.2	671.4	-1.8	74.1	10.4	71.9	104.6	26.8	67.5	58.4	55	-42	229.7	117.7	253.4	28.2	171.7	144.7	48.7	92.4	8.2	68.2	26	1.9	133.7	226.5	109.4	108.4	143.1	959.1	740.3
7	1273.1	763.7	299	430.6	883.5	567.1	817	836.8	1325.2	3871.3	3021.6	3641	624	428.1	1299.1	377.5	4333	1268.8	1485.3	2070.7	757.3	775.7	393.9	472	1054.9	895.1	904.5	485.5	932.3	450.8	1785.6	1231	1491.3	662.9	2410.5	879.4	750	711.4	716.2	1053.5	454.3	669.8	940.2	1296	756	907	551.7	3356	2363.7
8	4065.2	2868.1	1167.9	1228.5	3405.6	2498.5	576.4	2917.1	4338.3	8279.9	5985	7609.5	1865.5	1666.7	3399.6	2015.1	9315.6	3171.9	4040.5	4273.9	1998.8	2282.7	1280.4	1661	3151.6	3030.3	1811.9	1711.6	4793	2516.3	5235.8	3462.6	4663.9	2314	6141.4	3627	3468.3	3115.1	3891.9	3493.9	2355.7	2025.5	2813.7	4365.2	3624.1	3590.6	1800.6	6762.3	5357.1
9	4186.9	3280.9	1639	1822	4221.3	2904.9	3109.1	4201.7	7040.2	11153	6844.8	9270.9	2509.1	2051.2	4077.2	3608.1	11738	3804.7	4541.2	4423.8	2563.2	2968.1	1834.5	2242.3	4288.5	4386.1	2325.2	2439.3	3433	3184.8	5796.9	4490.3	5091.5	2930.4	8570.2	5090.5	5874.9	3974.2	5448.1	5288.8	2890.9	2743.7	3871.7	5863.1	5213.1	5050.6	3193.3	7907	6231.8
10	60.4	20.9	31.7	-19.7	-17.6	60.2	69.8	39.8	-43.3	103.2	46.7	158.4	-7.3	-0.4	48.9	58.9	171.2	-38.6	-40.6	-27.8	66.1	82.9	5.6	39.5	53.7	38.5	30.3	58.1	87.3	26.1	-3.1	-52.7	46	-109.6	6.2	50.1	0.1	118.7	-135.6	78.2	92.6	27.4	-75.1	13	112.7	-64.3	-58.7	79.1	-51
11	108.6	82.9	32.4	55.7	54.2	32.7	73.4	-1.3	114.6	2.6	55.4	31.3	72.8	17.6	67.7	61.9	41.8	57.8	44.1	49.8	91.3	106	21	-9	409.7	74.6	95.2	82.2	188.9	126.6	54.2	83	67.7	27.5	87.5	111.7	59.2	63.6	41.8	115.4	-22.6	185.7	80.2	93.9	-30.5	87.1	48	27.7	15.7
12	-253.5	-117.8	-134.2	-133.9	-221.3	-129.6	-270.8	-55.2	14.6	-41.7	-74.9	-106.3	-119.2	-177.6	-151.8	-22.3	-33	-78.8	-86.2	-40.8	-138.1	-134.2	-148.5	-110.5	-217.5	-257.9	-118.2	-103.2	-233.4	-401.5	-199.5	-194.6	-118.7	-283.7	-559.1	-88.8	6.8	-144.1	-172.3	-143.8	-146.5	-151.8	-248.5	-70.9	-25	-169.6	-83.3	-111.7	-48.5
13	-3.4	-31.9	-32.4	-0.1	-45.8	8.5	-26.4	-4.3	-96.1	-91.6	-34.2	-19.9	-32.6	2.2	-19.6	36.1	-36.5	-10.6	-8.4	-20	-96.9	-78.9	3.5	6.2	-118.4	25.2	-20.2	7.3	24.7	-45.2	-94.8	-26.6	-23.3	-37.6	-74	-38.1	-26.6	-58.7	-37.6	-114.2	-56.7	-7.1	-19.1	-25.3	-73.3	-57.4	-20.9	-45.5	-35.4
14	32.6	-22.5	-22.5	-0.5	-21.4	-50.9	23.9	-1.4	7.9	-6.1	-5.9	-18.2	-11.7	-5.2	-10.7	10.9	3.9	-12	-10.6	2.3	7.2	23.2	-16.3	-13.3	1.7	-7.6	-12	-57.8	27.1	-91.1	-16.4	-32.7	-25.1	-24.7	-17.1	-6.4	80.8	-7	-43.2	-44.8	-27.6	-27.3	-23.7	-42.3	39.4	-25.5	-17.6	-12.6	-1.7
15	-89.9	-4.8	7.5	29.8	19.3	-47.6	5.1	18.5	135.5	-3.4	61.1	35.9	17.1	-27.8	84.3	48	15.7	62.3	64	27.5	0.3	57	3.9	31.6	126.3	52.9	21.8	-17.4	117.9	140.6	-2.4	28.5	-85.7	-34.7	-41.7	-41.3	9.6	-29.3	166.8	60.2	-64.6	60.8	-0.9	16.1	353.6	47.1	70.2	6.3	75.5
16	40.1	71.9	25.9	78.9	44	0.8	74.8	17.2	66.8	167.1	167	123.1	30.1	50.7	8.2	33.1	148.8	58.6	39.4	57.7	-4.9	21.2	50.8	31.2	165.6	167.3	89.8	36.2	81	-32.3	26.1	36.6	77.2	-10.9	-207.3	32.3	3.3	-8.8	110.8	73.2	-13.8	77.1	-52	89.4	22.2	71.1	35.3	122.7	85.6
17	4.7	21	4.7	4.7	-18.7	1.7	103.1	62.2	98	67.8	63.8	89.5	25.9	24.3	28.7	8.3	30.9	3.8	37.6	31.3	10.1	24.6	19.7	16.2	42.8	-46.6	21.3	33.2	-44.9	-113.6	45.6	29.6	64.8	17.3	-16.9	46.5	101.4	45	119.2	34.3	-13.2	20.4	-88.5	86.6	45	53.9	60.2	99.5	53.8
18	45.1	16.3	-8.4	-21.7	-10.7	37.5	2.4	28.7	43.5	18.4	-27.3	-29.2	2.2	-43.5	72.4	22.9	-35.3	41.2	43.3	-9.5	-13.2	27.6	3.6	-9.3	42.7	-40.4	-9	13	63.5	-40.1	83.9	28.9	105.3	-27.2	14.4	-15.7	12.6	-11.8	-17.3	9.4	-58.4	-28.3	-65.7	62.6	57.1	-65.5	11.3	-40	-21.1
19	15931	22465	8059	6471.4	14627	19894	11958	8340.8	31760	12084	8469.6	10743	9925.3	10713	13075	8886.1	12576	6098.9	6422.8	1929.1	9382.1	11559	9184.3	9201.7	38506	31107	10805	17252	29994	34597	18058	10429	16570	9503.5	19489	14029	24662	7984.6	21387	20707	3273.2	26070	13984	10691	20269	25901	12254	8656.9	8223.5
20	90.9	49.2	58.5	40.9	119.4	-13.7	100.6	49.4	58.8	-2.7	10.7	40	65.3	79.9	41.4	-5.2	16.4	-0.2	-0.4	8	56.6	28.5	51.6	16.6	48.2	24	31.1	14.8	70.3	167.9	20.8	18.9	38.8	122.5	87.5	52.8	66.6	80.9	105.1	28.4	65.9	120.1	18.3	52	25.2	58.3	48.6	53.4	15.3
21	68.5	43.9	31.9	55	98.6	49.2	32.4	17.7	70.3	19.1	47.1	47.1	61.9	44.1	69.3	-3.6	-16	16.4	29.6	-0.6	14.1	19.7	53.9	25.1	89.3	111.8	20	50.1	47	161.9	26.7	21.8	30.1	68.3	41.3	41.1	51	27.5	31.1	111	8.7	108.6	35.6	30.3	65.1	6.5	6.3	59.6	28.4
22	-12.3	-34.9	-3.9	-4.6	-18.6	-11.8	16.1	1	13.3	-9.2	-2	-9.1	-18.8	18.4	-2.8	4.5	-8.9	-1.3	-1.6	-7	-15.1	-9	-10.3	-2.6	-11.9	42.6	-9	-6	-65.4	56.7	-17.6	-12.7	2.8	-10.6	-25.8	1	-15.1	-14.2	-17.4	-0.3	-6.3	-3	-17.7	-12.6	-34.1	-0.9	2	-17.2	-9.5
23	59.2	21	-6.6	8.7	-25.4	-15.3	44.7	-4.6	53.6	22.8	3.1	4.7	-2.9	11.7	40.9	7.1	13.3	-12	-5.7	4.2	3.9	22.2	-0.7	4.6	28.9	30.4	18.2	-15.3	96.2	-10.6	21	23.1	22.8	14	30.3	11.1	-44.5	13.4	-16.6	7.9	10.3	-26.5	13.7	18.6	46.9	12.1	-6.3	3.2	12.4
24	-41	14.9	-31.4	-13.4	-26.3	-11.1	24.7	12.3	19	-11.8	-25.2	3.7	-3.9	-20.4	-23.4	-9.8	-11.1	-14.2	10.9	-10	13.8	-5.8	-34.1	-17.1	-90.4	-45.7	-1.7	-50.7	-2.8	-30.8	28.6	4.9	-12	-24.2	-127.5	-10.8	108.7	10.6	62	4.2	-25.6	-29.9	-15.4	-24	5.3	-13.2	-20.3	-9.3	-28.9
25	99	53.4	-0.6	21.8	20.5	1.7	83.6	8	42.2	-0.4	27.5	13.7	11.3	19.7	-10	8	33.9	18.6	18.4	2.9	-19	44.2	28.9	23	27.7	54.8	45.3	38.9	28.5	-14.1	22.2	6.6	12.7	-28.8	-7.8	14.5	69	4.6	22.5	53	-16.3	59.7	2.8	26.3	51.5	33.3	23	23.9	20.2
26	-46.1	16.6	-23.6	-17.5	-35.7	-1.1	-11.4	-21.8	-29.6	-2.7	-19.5	-44.6	-26.7	-24.1	-16.9	-18.4	-22.8	-31	-10.7	-16.5	-41.2	-6.9	-16.3	-7.6	-46.3	-29.6	-23	-10.9	-77.9	6.2	-34.9	-28.3	-28	-38.6	-92.3	-11.4	-27.2	-33.1	-145.8	-38.3	-19.7	-7.7	-37.2	-45	-43.2	-52.8	-27.5	-29.9	-28
27	-101.7	-83.4	-40.3	-45.8	-95.1	-81.2	-93.7	-52.1	24	-46.4	-49.8	-40.4	-53.5	-81.1	-36.9	-14.4	-20.3	-27.3	-27.6	-14.3	-72.3	-48	-55.4	-18.4	-55.8	-84.9	-68.8	-19.3	-106.9	-282.5	-89.9	-97.6	-48.9	-99.3	-155.5	-33	-109.4	-61	-59.9	-41.9	-23.3	-74.4	-66.7	-52.3	-33.5	-34.2	-32.7	-44.8	-35.5
28	8.2	-1.3	34.2	33.7	64.1	50.7	70.6	40.8	46.8	90.9	68.4	66.1	27.1	21.1	53.6	20.6	83.9	5.6	-2.3	9.9	11.4	8.6	53.8	16	-15.8	59.7	0	47.7	4.5	-41.9	12.8	23.1	55.5	-57.7	154.6	36.5	-2.9	12.3	-5.1	-31.3	32.6	41.4	56	30.3	-22.1	42.1	31.9	79.9	-11.4
29	-0.6	-29.9	-22.4	-18.8	-29.8	-56.7	-12.5	-19.9	-16.8	4.9	14.4	8.2	-3.7	-0.1	3.9	-13.3	-9	-3.4	-8.2	-4.9	-22.8	-0.9	-6.7	-22.1	-26.3	25.7	-13.6	-26.1	38.9	-7.4	-36.6	-18.1	-10.2	-22.2	-56.3	-18.9	-46.9	3.7	-3.1	0.2	10.1	-45	-20.4	-5	-40.8	-33.3	-14.9	2.9	-4.7
30	-47.6	-31.1	3.3	-6.8	-8.5	-7.8	-35.6	1.7	-35.5	-35.1	-43.1	-35.5	1.3	-19.7	-37.2	-15.4	-18.1	-2.4	-11.6	3.4	-1.7	2.4	-6.1	-3.8	-28.5	-3.5	-31.8	13.3	-0.9	-74	-42.2	10	-23.2	-4.5	-61.2	-20.6	-42	-16.7	-8.6	-4	-25.6	-60	-17.5	-9.4	-40	-16.7	-9.1	-54	-11.6
31	-155.3	-77.8	-57.9	-66	-105.4	-62.7	-184.8	-61.3	-69.9	-113	-92	-177.3	-65.2	-85.2	-90.6	-51.7	-116	-54	-66.4	-35.5	-95.9	-50.2	-106.7	-57.3	-132.6	-132.4	-85.9	-52.8	-117.7	-144.4	-87.7	-110	-64.5	-84.5	-309.6	-104.7	-80.1	-76.2	-93.2	-63.8	-87.6	-88.9	-116.1	-111.9	-75.4	-122.7	-77.2	-139.5	-76.5
32	1.9	26.7	33.1	-1.4	54.5	17.9	10.9	30.1	26.8	7.9	6.8	38.1	0.1	22.3	30.6	-5.9	24	6.1	11.9	2.3	-17.5	40.9	30.8	13.5	69.2	66.8	3.9	32.3	39.7	-17.6	35.7	57.1	58.6	33.7	62.3	19.3	14.3	29.4	32.2	10.9	3.1	15.4	18	23.9	-27.3	3.8	8.4	8.7	5.9
33	-106.3	-189.2	-111.2	-68.3	-121.8	-157.7	-96.1	-64.5	-291.8	-60.2	-93.4	-86.2	-69.8	-97.7	-165.5	-104.6	-95.3	-54.9	-175.7	-85.3	-46.3	-67	-110.5	-131.5	-258.8	-350.7	-132.1	-312.1	-469.5	-342.5	-187	-116.4	-136	-100.2	-156.4	-65.5	-424.2	-87.8	-216.4	-180.7	-61.5	-307.1	-181.9	-96.9	-221.6	-174.3	-269.3	-91.4	-97.1
34	-64.1	-120.9	-31.1	-18.7	-134.3	-49.7	-58.2	-17.5	-144.8	-53.8	-52.8	-57.9	-39.1	-50.8	-49.6	-58.2	-49.6	-27.9	-47.5	-43.3	-37.3	-47.4	-45.8	-39.6	-90.3	-175.3	-48.4	-129.3	-150.3	-85.2	-68.4	-18.6	-46.1	-56.6	-125.7	-44.9	-196.8	-37.2	-142.8	-92.2	-11.9	-117.4	-43.8	-34.3	-130.2	-78.3	-55.2	-45.2	-67.5
35	-98.5	-203.7	96.4	17	-83.5	-71.1	-69.2	7.2	-122.6	-54.7	-54	-75.5	-14.4	-23.2	-63.7	-38.4	-63.3	16.4	-23.8	-33.3	-19	-16	-32	-50.1	-150.6	-193.8	-55	-150.7	-144.4	-90.1	-109.3	-58.8	-47.2	-33.6	-69.8	35.2	-39.9	96.4	-28.8	-105.9	262.7	-104.1	-28.8	-62.5	-86.5	-29.9	13.9	-38.8	35.3
36	-89.2	-105.9	429.8	113.2	-38.4	-34.7	-33.3	90.6	-107.4	4.4	-20.2	-65.5	190.6	153.2	0.1	-17.1	-14.3	113.9	84.1	-20.2	97.4	61.6	22.3	49.2	-166.1	-120.7	40.2	80.7	58.7	104.8	-35.9	2.1	44.2	87.3	30.3	148	20	299.6	242	-74.3	855.6	-53.2	71.7	41.5	9.6	-10.8	134.2	29.6	248.8
37	12.7	45.3	726	146.9	44.3	68.6	62.8	158.4	42.7	50.2	59.6	53.7	225.5	249.8	77.3	68.4	87.2	170.8	150.4	74.7	172.9	175.9	242.8	181.1	40.2	130.8	77.9	210.4	163.9	126.4	92	124.3	159.6	213.2	53.2	203.6	149.2	512.4	431.8	12.6	985.6	56.4	161.4	142.7	126.1	104.6	326.2	152.4	399.2
38	295.3	307.6	1340.8	493.2	286.8	333.8	240.2	605.1	67.5	324.8	359.7	327.7	866	750	333.7	186	443.2	745.5	945.9	166.8	693.8	703.6	688.4	683.5	299.1	734.6	678.5	695.9	805	445.1	522.5	517.2	486.2	656.1	294.8	679.9	449.9	1008.7	1533.3	172.3	1890.3	297.8	804.4	800.9	578.4	377	1110.9	615.3	1191.5
39	39.8	80.5	-35.7	-9.3	92.4	-11.3	50.9	191.8	525.1	377.8	345.9	279.1	33.3	19.5	58.2	69.2	212.8	-3.6	23.2	10.2	188.7	65.4	-30.8	21.2	110	469.4	-30.1	-24.7	-13	-32.1	193.1	-42.1	207.9	23.8	9876.2	442.9	108.1	43.3	106.7	32	-3.3	-44.1	102.4	349.8	115.5	149.2	109.8	203.9	155.3
40	21.8	-75.7	-75.9	-8.6	43	-3.1	53.7	125.5	290.1	503.1	517.1	538.9	87.6	-35.3	96.8	94.7	283	-38.3	59.1	15	-64.5	7.2	-34.6	-9.1	-81.4	841.1	-58.9	31.8	-107.4	-201.5	13.1	-80.8	190.3	-142.2	4846.7	231.1	38.4	9.7	158.5	55.8	-24.9	-81.8	45.5	189.8	86.1	198.9	98.4	91.6	119.6
41	21	38.6	-51.8	36.3	81.6	-24.2	558.6	238.3	1105	1790.2	920.7	1125.8	80.6	-26.6	62.1	123.6	502.5	34.9	77	37.3	-27.9	25.9	-50.7	71.6	-0.8	-91.4	-23.4	-66.1	-78.9	-269	-1.9	-7	147.7	-103.5	12475	472.4	371.3	33.2	278.9	273.5	90.8	8.1	120.9	161.3	150.9	290.9	161.1	553.4	182.7
42	2035.7	3993.4	4639.1	3511.1	1865.5	1552.4	4275.6	4534	9178	3089.9	2244.4	1752.4	3308.2	3160.4	4328	4866.9	4994.7	4337.4	3527.5	3076.9	2904.7	1911.5	3661.9	2979.9	5383.1	5302.5	2352.4	2632.5	2650.5	3131.2	1792.8	3614.6	2870.7	3495.1	6474.6	3974.6	3438.9	2364.9	3923.3	1971.3	5171.4	2079.6	2163.5	3935	2770.6	4027.7	1845	2537.4	4095.9
43	2611.2	9751.8	4276.1	2610.7	1588.8	1666.2	3769.9	2991.4	14632	3262.1	2386.1	1975	3713.6	2941.8	4434	4216.5	3912.6	4571	2720.5	2603	2674.6	2070.4	2616.6	3217.6	10004	5938	2676.3	2314.2	2186.1	3665.3	1956.8	4199	3345.7	3616	5758.1	4630.9	2638.4	2012.5	4017.1	2134.4	3554.5	1513.1	2152.5	3804.9	2941.1	5807.9	1604.6	2533.3	2838.8
44	5787.5	12398	5422.1	4047.4	2729.8	2790	5895.4	5307.2	12585	7030.6	5471.4	4631.5	5375.3	4507.4	6254.5	6113.6	7839	5126.5	3956	3799.3	4947.3	3973.5	4508.3	5033.9	8664.8	5775.5	5752.7	3418.9	4710.6	4182.8	4177.7	6862.9	5552.4	5339.8	9969.9	5736.8	3942.5	2511.9	6047.1	2932.5	4935.9	2925.5	3376.9	6959.1	3878.8	5882.5	2477.7	5021.6	4790.3
45	1220.9	986.1	3141.2	2906.3	2536.3	2742.9	4716.4	3019.4	2388.7	2151	2380.4	2109	4223.6	4094.3	3787.2	2475.6	2883.2	2466.4	2744.2	2856.8	3203.4	2791.1	3367.1	2521.6	3059.2	5077.7	2355.3	3672.8	2840.9	2917.2	2271.2	2975.4	3523.2	6178.6	4209.3	1788.4	2680	3480.6	6747.6	3509.2	4432.9	2526.1	2468.8	2736.7	2994.4	3687.6	2770.2	2575	3743.5
46	2192.1	1407.9	4498	4004.3	3082.2	4814.7	5176.4	4572.7	4548.4	2045.9	2624.1	2025.4	6365.9	6791.8	5166.7	3303.8	3393.4	3503.1	3519.1	3213.5	5766.9	4478	4559.7	4070.5	4924.4	10625	3335.9	4941	3266.9	6522.9	3344.8	5350.9	4294.5	7494.1	4417.2	3089.1	3260.6	4106.6	10785	6202.2	5187.3	4248.1	3252.7	4881.1	5282.3	5957.9	4098.7	3209	5081.7
47	6760.8	5008	3498.8	3096.1	4279.3	8000	6335.2	4634.7	9770.6	4675.5	2998.4	4493.1	5081.3	5914	7612.6	5148.4	5414.6	3214.7	3691.7	3439.6	4628.2	5397.7	3871.4	4468.7	11108	14967	4282.1	9926.2	7197.2	11966	8013.7	6377	6461.5	5893	8147.5	7006.4	7408.3	3666.2	9261.5	8698	4665.5	9374.1	5923.9	5868.9	8814.7	11171	4933.7	4115.7	4757.1
48	52.6	61.5	58.6	80.3	78.3	51.4	59	60.3	117.8	26.7	55.9	74.5	56.8	49.7	88.9	52.9	60.2	68	35.5	22.5	29.7	68.7	38.5	30.9	51.6	80	30.5	81.6	66.9	169.9	37.9	24.5	87.5	72.1	71.2	118.9	110.8	100.4	138	76.9	130.6	76.2	39.4	76.8	91.1	206.2	112.2	42.9	66.5
49	16.1	-39.4	17.7	26.7	43.4	4.1	11	17	26.9	-0.3	5.1	-12.4	39.4	4	52.8	41.1	16.8	22.4	6.3	1.7	24.4	11.7	4.6	12.9	-11.9	-16.1	-0.7	-0.4	1.5	-35.1	2.9	11.2	-15.3	11.4	-94.4	54.9	-34.1	34.3	-12.1	-18	57	-5.4	-7.2	16.9	18.7	123.6	66.3	-9	0.6
50	-14.1	20.5	126.8	82.6	172	26	26.4	50.4	64.2	65.8	111.9	34.1	76	70.5	98	57.5	97.2	119.9	61.3	55.7	43.9	24	64.9	25.6	52.4	136.1	20.7	48.2	34.7	99.1	47.1	48.8	68	133.5	72	225.6	87.9	126.6	87.7	5.1	136.7	120.5	79.7	50.9	29.9	254.9	100.5	41.2	38.1
51	238.6	117.2	193.5	245.1	533.6	496.1	737.2	767.4	1853	1341.6	1327.9	826.1	319.6	315.9	557	957.9	1464.2	556.7	705.9	543.8	245.4	199.5	172.3	213.4	369.9	821.8	297	648	402.8	390.4	503.5	338.6	657.7	261.3	5339.6	781.2	805.8	425.3	1699.7	1611	159.1	199.5	658.1	2227.9	2113.5	1321.3	874.9	868.5	946.7
52	1395.1	872	521.2	482.5	794.4	831.2	744.9	770.1	3045.5	1958.3	1682.2	1227	462.4	456.5	746.9	869.6	2244.5	804.8	1043	593.9	622.2	681.7	468.6	510.3	1340	1608.3	736.6	1109.6	1317.1	1040.5	1465.1	508.9	1026.6	473.8	6817	956.9	1452.5	524.2	2585.2	1497.6	234.2	1195	654.4	3339.3	2500.6	1274.3	659.8	1127.7	1286.2
53	-17	218.7	152.8	161.7	93.9	190.3	118.5	41.4	440.1	136.9	249.8	228.3	122.3	42.5	-91.9	135.8	170.2	39.6	29.1	115.4	76	80.2	154	140.2	111.9	87.3	153.6	207.9	-287.2	230.6	103.7	34.9	-90.2	113.7	-214.2	119	221.4	174.3	198.8	86.9	74.6	35	-231.4	246.3	371	283	104.3	-111.2	7.2
54	207.5	100.1	72.9	146.2	160.7	155.2	228.5	102.1	316.5	2851.5	3090.7	1899.8	155.4	103.7	174.4	113.5	3782.3	120.6	178.3	97.8	147.3	154.9	139.3	114.3	315.7	219.3	181.7	117.9	97.5	70.6	162.4	125.7	181.3	77.8	1252.5	189.5	96.2	97.1	196.2	177.8	130.1	2.5	148.5	214.7	237.6	153.5	103.9	2360	224.5
55	-77	-43.4	-3.8	11.8	-70	-10	-82.3	27.9	62.4	165.8	145.2	95.8	16.7	-57.3	-20.4	46.2	331.6	-2.3	-16.6	-0.4	-62.8	-24.5	4.9	5.7	-54.3	-91.6	-3.3	-18.5	36.9	8.2	-37.5	-43.7	-19.1	-48.5	128.6	-21.1	7.8	-3.1	46.7	-24.8	-48.5	-5.2	-58.6	5.1	-31.7	-24.1	-12.8	123	-11.4
56	32.2	39.7	39.6	25.1	-31.8	43.8	3.6	27.4	86.8	464.5	331.2	97.6	18	-23.2	23.1	31.3	832	24.7	15.4	10.1	23.5	14.6	21.8	15.8	68	43.5	54.9	26.2	-59.5	-7.9	23.3	18.8	47.2	-8.7	51.8	2.8	53	13.7	17.6	52.1	-34	38.1	14.6	13.8	70.3	-15.4	40.8	233.2	41
57	93.4	64.6	75.7	76.9	43.7	113.6	175.4	81.3	164	1179.6	1053.5	687	33.2	53.4	109.6	84.4	1229.5	72.9	80.4	35.3	66.5	52.9	40.9	45.7	80.5	160.7	129.4	18.9	220.3	91.8	29.7	78.7	187.8	2.7	248.5	109.4	58.7	29	111.5	134.9	104.7	14.7	34.3	119.4	103.9	64.8	68.2	853.9	97.3
58	-126.1	-65.4	-105.8	-85.1	-82.7	-65.6	-76.4	-43.1	-61.7	45.7	14.1	27.2	-84.2	-117.1	-98	-40.4	14.6	-23.8	-14	-14	-53.4	-46.4	-83.5	-40.9	-145.2	-28.1	-59.6	-100.3	-234.8	-79.4	-107.3	-165	-124.2	-207.3	-306.6	-72.6	-125.1	-121.1	-37.3	-66.4	-24.9	-65.4	-160.5	-30.4	-57.3	-113.3	-74.2	38.8	-10.8
59	267.6	18.2	147.1	96.7	122.5	77.5	278.5	66.7	94.8	322.4	218.5	284.1	67.9	93.2	89.1	19.5	326.3	2.5	47.8	44.7	172.5	138.9	179.5	98.1	142	105.9	155.8	126	10.6	58.1	43.3	106.7	229	101.4	461.1	128.7	154.4	131.6	37.4	72.2	130.3	192	118.1	38.8	48.3	84.8	55.7	355.9	23.4
60	94.8	127.2	94	68.1	100.5	57.9	207.9	109	96.4	102.6	150.5	116.5	44.7	79	105.5	75.5	107.5	60.7	290.5	10.7	154.4	110	60	106	291.8	228.6	165.2	129	291	315.5	103.8	147.2	81.5	189	166.2	59.4	254.7	47.8	141.2	103.3	50.9	225.8	192.6	118.1	131.5	34.9	92	96.2	56.2
61	-20.9	9.4	9.5	-2	30.5	-4.9	27.5	20.1	91.8	23.2	14.9	18	19.8	5.8	13.7	55.5	30.3	17.1	79.5	7.7	8.3	1.6	2	15.6	105.3	38.4	-0.6	36.6	154.6	-2.4	72.1	-2.2	39.2	14.1	73.1	16.8	138.9	26.7	89.8	7.3	28	57.4	26.6	9.6	85.2	29.1	23.3	20.1	42.4
62	126.5	79.2	52.2	62.5	96.7	83.5	60.4	66.1	112.6	109	82.9	61	65.4	95.2	85	65.2	50.5	61.5	196.6	23.9	114.2	74.7	202.1	169.7	101.3	200.4	171.9	112.7	557	152.6	137.5	58.7	212.9	86.4	54.1	70.7	446.9	83	147.6	79	162.2	98.8	378.8	58.5	105	143.2	96	104	200.5
63	29.6	48.5	23.6	5	-5.2	-6.4	22.5	15.8	57.6	21.2	7.4	29.5	54.8	29.4	36.9	17.4	19.3	20	172.3	6.8	58.2	30.2	9.8	44.8	37.4	68.1	29.2	54.8	192.2	83.3	30.9	48.3	46.7	24.7	39.8	26	137.4	26.9	84	2.1	18.9	42	35.5	31.7	45.3	49.4	29.8	20	42
64	65.2	139.9	80.7	46.6	37.4	31.1	20.3	92.1	94.9	54	22.8	24.1	65.4	39.4	16.9	84.7	45.5	74.6	116.5	33.6	106.3	55.7	143.5	61.1	-25.4	117.3	41.2	133.4	309.7	77	92.6	168.2	102.3	85.4	91.9	179.6	144.8	160.1	214	67.6	156.7	29.4	159.2	97.9	119.4	142.4	228.6	87	116.2
65	6.1	18.4	1.1	-6.1	18.4	20.2	21.1	9	74.7	3.7	18.4	23.5	19.1	18.3	25.3	37.6	27.4	15.5	42.4	31.9	6.8	11.4	18.8	-1.5	-3.7	57	-1.7	36.5	66.4	6.8	-0.5	57.4	1623.1	7.3	21.9	35.2	34.6	29.2	84.8	24.6	51.2	-27	53.9	8.5	51.7	9.8	16.8	24	113.5
66	127.5	73.6	66.4	39	106.3	49.5	95.5	49	102.7	47.8	63	43.2	43.9	43.6	58.6	53.2	24.6	32.8	103.4	29.2	73.4	78.5	51.4	48	100.8	123.2	65.7	59.9	311.9	134.8	57	236.6	50.7	104.5	149.5	64.8	102.8	87	194.9	52.5	91.4	-56.1	53.2	70.2	146.5	93.2	40.1	36.9	79.6
67	394.1	534	477.9	278.9	495.6	522.7	534.9	279.9	474.2	301.4	410.4	332.7	313.1	348.9	375.7	125.2	299.3	275.9	238.9	235	420	322.9	360	385.8	539.7	586.1	410.4	400.2	2172.4	896.3	453.4	497	365.2	670.4	912.1	339.1	502.9	424.1	640.6	376.5	330.3	55.9	665.6	275.8	361.4	430.2	339.2	363.3	261.3
68	-6.9	29.1	16.7	-1.1	-11.1	43.7	53.6	34.2	133.9	5.7	-38.2	6.8	2	-2.4	33	19.4	-17.5	-10	50.7	47.1	52.7	13.7	9.7	2.6	55.5	-38.9	-2	38.2	75.1	44.5	48.8	65.3	-17.9	10.4	19.3	56.4	44.3	47.8	63.7	46	45.7	-33.9	29.8	28.3	28.7	2.1	-17.7	9.4	70.6
69	83.8	94	90.3	121.9	254.9	193	184.2	158.2	131.3	105.6	187	256.6	125.7	173.9	102.7	70.6	129.3	225.6	177.9	139.7	160.1	146.4	210.6	72.8	245.3	290.4	194.8	151.3	223.8	372.9	169.2	190.1	205	207.3	276.9	133.6	341	262.2	466.5	145.6	115.3	67.8	321.4	160.6	204.1	298.5	287.6	188.7	206.8
70	-340.6	-223.9	-166.8	-199.9	-142.4	-316.3	-244.9	-144.6	-224.3	-214.1	-113.4	-215.2	-207.1	-183.1	-168.2	-5.5	-109.4	-88	-91.1	-66.5	-231.2	-187.9	-222.4	-172.6	-312.3	-227.2	-181.4	-341.1	-288.2	-415.7	-195.2	-137	-120.3	-263.2	-442.4	-179.4	-275.1	-178.4	-160.4	-194	-179.7	-455.1	-237	-56.1	-168	-185.8	-84.3	-344.9	-107.6
71	-340.1	-194.8	-109.7	-132.7	-205.2	-129	-237.6	-53.4	-64.8	-58	-132.7	-324.9	-117	-134.5	-99.1	20.8	723.7	-106.4	-89.6	-62.2	-149.7	-88.8	-151.7	-114	-407.9	-182.4	-162.5	-135.2	-332.5	-151.1	-117.4	-152.5	-85.7	-207.8	-287	-57.2	-115.9	-111.8	-193.9	-162.5	-30	-282.2	-139.2	-70	-107.5	-118.8	-80.2	-291.1	-55.7
72	317.9	254.9	261.8	53.4	219	213.8	29.6	84.5	121	178.8	415.5	66	117.6	78.2	133.5	167	957.3	312.2	160.2	131.7	115.1	155.3	58.8	239.8	173.6	344.8	138.2	175.8	213	120.4	218.1	210.2	130	150.5	169.1	373.9	226.3	7.1	375.4	50.2	217.3	105.5	182.3	207.3	289.1	271.2	73.5	-0.7	73.4
73	230.7	333	150.2	144	277.3	314.5	227	212.5	376.3	111	455.7	163.2	53.6	297.5	219.1	248.4	716.3	645.4	185	208.1	164.6	1827	198.7	238.5	534.5	100.1	70.8	168.5	47.6	475.2	188.7	724.3	81.5	306.7	511	136.4	127.6	98.6	761.4	156.5	399	750.8	182.4	185.4	188	80	72.7	190.1	341.8
74	-340.7	-31.1	-130.2	-217.2	-177.2	-17.7	-448.1	-87.2	-71	-79.5	-85.1	-164.5	-73	-70.3	-259.5	-24.6	-204.2	-40	-12.7	-75.6	-231	-131.1	-54.7	-36	-190.3	-164.7	-118.1	-58.4	-37.1	-309.1	-134.7	-289.6	-97	-380.2	-600	-193.3	-284.3	-45.6	79.1	-160.6	-134.2	-44	-126.8	-73	-1.7	-94.4	12.8	-2.9	-107.1
75	-73.8	79	3.8	-14.1	20	-67.9	-28	6.1	105.2	-11.2	5.4	-17.5	17.9	-13.7	-6.1	20.7	197	16.3	-0.5	-7.9	-33.5	-34.5	-32.6	-14.9	-18.1	-24.6	-26.1	18.1	29.8	24.9	16.2	1.4	-19.3	-46.1	-46.4	-67.1	98.5	21.8	72.5	-25.7	0.2	-42.1	-19.4	66.7	-5	5.6	-9.4	-35	-1.5
76	-47.9	30.9	-5.5	-0.4	64.3	1.3	-26.2	-3.7	-3.4	11.1	-8.6	13	6.1	-4.1	22.5	2.9	74.2	-1.3	-7	-3.3	-10.7	-6.2	-8.6	-6.1	-25.8	-9.2	4.2	2	26.7	76.7	-6.1	-6.8	-27.3	-5.3	-13	-9.9	16.5	-14.2	84.7	-2.5	27.5	-46.8	5.2	8.7	14.1	0.4	-0.8	7.3	-1.8
77	-0.7	29.8	22.5	10.3	60.9	30.3	38.2	40.9	32.1	24.8	18.7	26.7	26.1	22.4	37.9	17.5	165.9	18.3	13.6	28.2	-4.3	9	10.6	0.1	89.9	64.6	0.2	25.7	96.5	120.4	16.8	20.9	21.2	46.4	59	21.3	69.5	31.9	39.9	54.7	31.7	24.3	69.9	22.1	54.6	31.7	29.7	24.6	98.5
78	49.9	81.6	104.5	76.2	122.3	82.7	102.1	96.3	152.1	53.3	97.2	92.5	89.7	163.9	84.5	281	186.3	129.5	120.3	60.2	68.2	29	49.4	96.1	24.5	173.9	100.2	71.1	175.3	181.5	127.9	140.9	46.4	85.4	59.5	163.3	128.3	115.9	216.3	77.9	405.5	90.4	113.9	127.8	123.6	182.3	78.6	142.9	52.5
79	118.5	210.2	195.1	78.2	201.4	109.1	210	141	227.9	216.7	169.7	264.2	126.8	160.4	143	33.5	309.3	190.7	156.7	80.5	108.2	154.6	189.5	135.7	295.2	345.2	170.4	122.5	227.1	375.8	162.9	111.4	143.3	343.8	422.6	124.1	227.9	126.3	270.6	181.7	111.8	168.3	212.9	155.8	203.7	207.2	149.2	214.8	116.9
80	-0.6	-40.5	-1.8	-17.5	-31.9	-15	1.7	4	87.2	-19.5	-16.3	-32.4	3.2	43.2	-4.9	5.1	461.9	6	-2.3	3.8	2.4	-25	-10.5	-19.2	-34.5	27.5	-12.7	1.1	65.4	50.2	-11	76.5	-34.1	-7.4	-73	2.9	41	34.2	32.9	-2.8	28.2	-44.9	-23.7	6.9	19.5	15.4	-4.7	4.2	2.6
81	69.9	84.3	68.2	137.3	167.3	28.2	98.1	82.6	110.3	50.9	-17.8	64.2	128.9	53.3	128.3	58.6	90.9	60.7	65.2	44.2	33.4	110.8	45.8	37.4	148	186.8	77.8	100.5	143.2	192.7	118	157.4	168.8	164.3	334.5	118.6	199.3	109.1	292	115.2	120.2	82.9	168	36.9	135.8	106.5	90	60.8	40.1
82	-60.6	150.8	182.1	191.4	58.5	280	83.5	268.9	334.7	139.9	332.3	125.7	116.5	191	144.9	167.2	271.8	327.4	240.6	160.9	0.7	150.1	244.1	92.4	628	186.1	82.4	119.2	224.2	191.5	172.4	180.8	138.8	138.9	104.4	152.1	203.9	234.1	255.8	300	18.6	316.7	64.9	149.8	381.7	209.2	341.9	-26.4	314.4
83	32.9	19.3	11.3	9.6	19.1	-14.2	21.8	13.1	11	5.9	3.6	20.1	27.1	53.5	19.5	18.9	16.7	16.5	-1.8	6.2	36.1	14.7	12.9	12.8	7.9	45.4	11.4	-20.3	24.3	24.1	-7.3	23.1	22.5	39	35.4	14.1	55.2	16.1	42.5	-1.7	27.4	-33.1	47.6	41.4	60.4	28	31.4	24.2	5.4
84	22	23.4	11.8	5.9	3.2	9.1	17	-1.9	38	-1.7	15.3	22.3	15	1.4	2.2	7	11.6	-5.5	-44.9	13.3	19.1	24.9	2.6	17.3	-26.8	42	21.6	-5.9	3	-15	18.1	6	14.8	10.4	54.7	2.9	74.3	8	31.3	0.2	13.6	10.9	21.2	18.9	-7.7	10	15.7	15.7	1.8
85	304.1	215.2	183.1	93.1	187.2	243.3	257.6	213.5	47.1	186.3	284.2	198	122	121.2	123	167.4	50.6	256.2	190.1	388.4	222.4	184.3	205.6	190.9	164.4	76.5	302.4	250	140.5	229.2	440.1	216.7	146.2	136.9	49.5	187.6	137.9	173.4	220.6	153.6	213.1	118.7	255.1	184.8	160.9	249.6	162.7	168.6	303.6
86	375.9	289.3	382.2	400.6	178.9	526.6	178.2	327.2	370.6	227.9	414.5	240	334.3	479.5	348.3	102.3	279.9	208.2	281.6	385.1	305.8	385.9	346.8	325.9	282.5	418.3	316.3	387.7	-135	640.4	379.5	404.8	277.9	369	129.2	241.9	283.2	531.8	763.9	467.9	291.5	291.8	282.2	362.3	654.8	369.4	424.5	273.5	275
87	-52.9	-53.9	-24.3	-57.8	-84.1	-60.6	-261.7	10.3	8.7	39.3	1.7	22.5	103.7	32.8	32	-40.2	-11.3	34.2	21.7	26.8	103.3	78.5	-28.8	161.7	-25.5	-107.6	131.2	-48.8	-139.9	-182.3	340.4	-41.9	31.8	38.5	-243	28.1	-118.9	-60.7	17.5	-14.2	-1.3	-78.9	-114.8	-43.1	-14.1	-104.8	52.5	123	83
88	504.2	187	132.6	234.1	162.7	202	355.4	100.4	167	147.9	153.5	201.8	160.9	169.2	165.5	46.8	106.4	94.1	76.5	78.9	280.8	160.5	183.1	132.5	220	322.3	169.6	179	559.2	824.7	170.6	145.6	196.4	388.1	586	95.1	118.4	125.7	225.1	140.3	114.5	207.1	118.1	106.5	146	87.6	131.1	153.5	119
89	267.9	426.5	382.4	486.1	276.7	435.9	344	277	162.6	152.1	341.9	244.1	313.3	371.9	405.5	201.6	445.1	368.4	287.2	230.2	295.9	389.2	346.9	219.8	342.7	349.9	266.8	392.3	271.1	455.4	283.4	495.2	276.6	374.4	521.2	351	247.3	351.8	498.2	215.3	472.3	442.9	226.8	319	414.8	374.1	689.3	308.7	306.3
90	249.1	38.5	68.2	108.9	58.9	126.3	82.6	119.8	8.5	43.3	126	90.7	75	151.2	83.8	120.5	27.9	120.7	132.8	123.7	138.6	95.8	216.4	95.2	-42.4	64	195.3	171.4	39.6	151.3	92.9	105.9	77.3	48.3	93.6	206.7	84.4	96.2	101.5	94	110	166.7	160.8	113.3	103.3	72.4	173.8	99.5	67.8
91	253.4	321	252.4	173.7	140.2	190.1	145.7	163.9	210.6	173.6	241.8	225.5	201.2	153.2	250.2	225.1	233	180.5	198.8	164.3	189	212.1	178.9	206.3	172.8	216.3	185.2	206.9	249.8	197.9	174.8	288.8	156.6	176.1	269.7	175	308.8	141.4	221.1	124	175.5	197.4	127.7	172.1	167.2	134.7	324.7	228.3	177
92	18.5	117.6	78.8	38.2	40.6	-4	32.8	26.6	53.8	26.5	30.1	27.2	67.2	63.5	28.2	42.7	120.5	65.5	58.4	23.6	44.2	49.3	83.4	48.6	53.2	48.8	41.9	36.6	66.1	27.7	38.1	81.8	20.1	62.6	60.6	146.1	111.4	49.8	72.7	3.6	97.9	16.7	2.2	70.2	96.7	44.8	40.9	38.5	10
93	162.4	86.9	187.9	112.7	117.3	130.7	120.7	85.6	166.5	135.8	208.3	202.6	171.2	115.5	141	117.6	233.9	182	180.8	117.2	139.4	124.5	276.2	156.7	287.9	250.4	118.8	185.8	313.1	187.7	136.3	169.3	220	91.6	165	160.1	145.8	139	186.1	221.8	208.3	144.4	81.6	127	195.3	291.4	232	166.6	163.6
94	191	268.9	159.9	128.4	195.5	191.7	237.6	152	259.9	159.5	216.8	267	168.6	120.1	177.9	102.6	189.3	125.1	119	116.9	177.6	157.8	161.7	147.2	177.8	198.4	140.2	113.7	213.6	360.2	144.9	209.8	167.6	206.4	413.2	94.9	275.5	209.4	247.8	159.7	98.5	192.9	223	171.6	185.7	174	92.2	183.9	168.8
95	222.1	18.9	55.3	31.6	105.7	46.3	123.4	49.7	122.9	60.1	255.1	99	77.5	20.6	46.6	14.8	68.8	33.4	29.7	24.6	80.2	56	78.5	61.2	137.4	72.6	51.8	35.8	121.4	97.1	144.3	63.9	63.8	72	287.1	116.9	111.9	51.6	83	39.3	83.5	-39.8	94.5	78.4	82	97.6	39.1	69.1	36.3
96	-47.4	6	-22.8	-31.9	-30.7	-30	-39.5	-13.7	-17.8	-6.7	-36.3	-16.5	-19.9	-14.1	-30.4	7	-22.2	-35.6	-17.6	-11.8	-22.7	-24	-18.4	-22.2	-118.4	-59.3	-14.1	-29.1	-13.9	-76.1	-10.6	-22	-22.4	-34.4	-14.7	-15.6	-19.3	-32.3	-23.5	-18.3	-21.8	-4.1	-28.9	-8.9	-11.5	-8.1	-10.9	-20.1	-21.2
97	8.1	3.8	4.3	1.9	11.5	-5.2	-8.9	9.5	13.5	-3.5	-1.6	7.5	7	-5.4	-8.5	-1.2	-6.9	-3.8	-1.1	-0.5	-3.8	1.2	-1.7	6.3	-1.4	16.9	-5.4	-3.9	-18.3	74.5	7.3	4.7	-1.6	-2.2	2.2	0.4	21.1	13.4	33.6	-3.2	21.9	-22.6	4.1	1.9	1.6	11.1	-0.6	6.5	1.5
98	330.8	105.1	144.6	127.4	168.5	141.4	298.2	186.1	171	74.1	151	198.9	157.9	168.5	154.5	82.3	147.2	95.4	107.8	95.3	163.7	128.5	194.5	130.5	182.5	230.3	183.4	148.1	193.1	274.2	196.7	201.3	267.5	112.5	335.2	247.9	334	238.4	319.3	172.6	173.4	153.5	188.8	120.5	198.6	161.6	151.8	159	160.1
99	46.2	61.5	49.8	15.4	48	31.5	40.2	40.1	55.6	56.7	74.7	54.3	21.9	36.2	54.8	25.4	107.5	38.4	29.4	30.8	40.5	33.3	29.1	20.9	16.8	44.4	32.3	26.2	65.4	48.9	52.1	77.8	68.6	57	101.1	41.6	4.3	50.2	52.5	61	39.6	-8.6	66.1	22	39.9	25.6	33.1	34.6	37.9
100	-22.6	0.3	0.1	-5.1	19	-18.9	-7.5	1.9	-32.8	9.5	-10.3	3.5	-3.9	6.7	14.2	-0.2	-16.7	-2.9	-1.5	8.2	-0.9	3.4	-3.4	-5.1	-28.9	-16.8	-7.8	9.2	-28.6	24.4	-4.8	12.5	52.7	-15.3	-5.2	15.8	28.6	0.7	13.3	-11.7	2.6	-66.9	-8.9	-14.1	-35.2	-19.3	-8.7	-0.2	0.4
101	0.6	44.6	14.3	-14.8	15.6	18.5	3.5	-4.6	39.9	-2	8.4	41	-2.6	10.3	28	3.8	19.5	-2.1	-12.5	-4.3	-4.5	6.1	34	-5	21.2	-23.8	-2.6	1.3	4.4	23.4	4.3	25.2	3.9	4.4	94.6	2.2	6.9	34	60.5	14.9	19.2	-4.6	19.8	13.3	8.7	19.2	38	10.2	16.4
102	-109.6	-100	-102.4	-56.7	-145	-111.8	-130.9	-55.3	-52.6	-52.6	-44.7	-85.5	-109.1	-51.4	-65.1	-57	-64.6	-48.4	-56.5	-30.9	-36.8	-58.9	-35.3	-25.8	-129.9	-169.1	-68.2	-113.2	-153.2	-141.4	-90	-58.1	-58.1	-99	-205.4	-49.8	-0.4	-26.9	44	-46.9	-75.6	-56.2	-121.8	-8	-57.1	-134.4	-120.4	-118.7	-58.5
103	37.9	25.4	38.7	25.5	44.7	60.7	12.8	14.6	76.1	73.9	51.7	61.6	39.3	19.9	14.4	33.3	97.4	23.3	12	53.3	28	30.9	26.1	77.7	34.5	47.2	26.2	51.9	142.5	135.1	20.3	20.2	43.4	14.2	78.2	12.5	26.2	25.4	126.8	17.7	27.7	65.2	12.3	51.7	-16.3	21.3	68.5	59.8	30.9
104	68.3	25.8	22.8	21.5	59.3	14.7	4.5	10.1	12.9	26.8	6.8	9.2	43.8	-6.7	28.9	30.1	-33.2	23.6	-4.4	-8.6	16.8	49	-4.1	43.2	11.6	-34	5.3	87	45.9	153.9	17	37.6	62.9	33.2	14.6	53.1	3.4	17.5	39.2	81.3	21.9	9	18.4	3.9	9.5	100.7	63.3	29.2	-5.4
105	-87.1	-80.5	-112.9	-62.4	-110.4	-37.4	-108.1	-44	-19.5	-65.7	15.3	100.3	-62	-46.7	-40.4	-13.9	-20.2	16.9	-50.1	-32	-67.4	-32	-46.9	-76	61.9	-109.1	-70.8	-182.1	-238.3	-355.3	-61.9	-128	-97.7	-110.4	-203.1	-93.1	-214.7	-39	-214.1	-97.5	-148.9	-39.4	-181.3	-24.6	-118.8	-169	-45.6	-193.7	-36.7
106	-26.6	-47.6	15.7	12.1	7.2	10.1	-6.6	8.2	-33.8	9.4	-6.3	1.6	-2.1	10.8	38.5	-4.2	-22	-0.1	9.7	19.2	-27.7	-8	4.4	6.3	-36.9	-32.9	-16.5	17.7	-47.9	29	-24.5	-1.3	21.6	6.7	55	12.2	-11	34.1	27.4	6.7	8.6	11.5	-17.3	6.1	20.5	15.9	22.8	-5.4	11.3
107	876.9	4482.8	1987.2	1080.4	901.7	3098.8	1026.3	1081.4	1061.1	1982.3	1778.1	1441.8	798.8	1421.1	754.4	1707.9	1854	2922.2	1104.4	1534.9	1093.3	1473.8	1291.4	1280.2	3508.9	3362.1	1125.8	1634.5	2221.8	2129.7	1300.4	1763.6	1088.8	1709.6	1118.2	1333.9	1227.3	1639.7	1531.2	849.5	2495.8	2053.1	1170.5	787.9	1264.7	1735.6	1194.7	1215.6	1987.5
108	175.3	120.9	92.6	160.1	106.6	187.7	231.2	62.7	213.6	71.6	86.2	101.7	78.1	151.4	117.2	107.8	78	55.9	47	40.1	70.9	120.9	171.2	79.1	203.3	230.7	43.7	126.8	-120.1	231.4	146.9	94.4	139	201.5	344.8	120.3	95.3	188.4	163.7	141	76.6	229.4	173.1	48.7	195.7	86.3	118.5	109.7	40.8
109	-207.9	-89.7	-198.3	-200.2	-363	-232.6	-189.9	-135.9	-280.6	-125.8	-234.4	-193.3	-235	-214.9	-203.9	-30.7	-262.5	-213.4	-198.4	-153.9	-155.3	-165.5	-161.1	-155.8	-449.3	-448.6	-200.5	-243.4	-652.7	-577.6	-242.6	-241.8	-262.1	-337.6	-570.8	-221.6	-223.7	-312.1	-301.7	-217.5	-230.5	-263.4	-275	-174.9	-246.9	-99.9	-242.6	-291.5	-190.7
110	115	73	242.7	150.8	35	75.4	37.3	44.1	85.8	143	76.7	81.8	115.3	155.7	77.2	100.9	255.6	72.6	68.6	97.7	171.9	251.3	40	85.7	241.8	146.6	95.7	49.9	15.6	1.7	65.9	73.9	66.6	163.3	177.1	88.1	-4.9	195.3	119.3	-5.9	376.8	-2.2	-23.1	34.3	45.1	44.1	110.3	25.6	40.6
111	29	-108.1	115.8	77.7	25.3	-4.4	45.6	175.2	107.8	82.8	37.7	45.6	-19.8	49.9	56.7	131.3	20.9	146.3	94.3	225.9	64.5	32.1	60	-8.2	-100.8	11.6	-47.5	-17.4	-98.2	-105.3	-14.6	10	100.6	10.7	85.9	23.1	232.2	115.9	-101.4	48.1	21	97.7	77.6	22.7	34.5	59.7	201.2	73.9	134.3
112	-36.4	3.2	-19.5	-50.6	-53.9	21.8	-42.2	7.5	4.6	-13.8	-27.9	-44.4	-67.3	-37.8	-31.1	-22.6	-38.1	-4.3	1.1	-14.1	-56	5.3	-27.1	-17.1	3.8	-65.9	-40.2	-52.2	-43.6	-108	-131.9	-83.7	-0.3	-78.4	-73.8	-61	-15.7	-68.4	-121.2	-60	-106.6	-14.5	-130.1	-42.9	-8.1	-79.3	-59.5	-17.9	6.2
113	29.4	35.8	22.4	27	35.1	-21.6	43.7	13.4	51.8	6	22.1	23.2	17.2	11.1	39.4	19.2	9.4	19.5	6	1.4	30.1	9.3	20.7	19.2	66	82.4	26.7	54.7	-2.5	23	40.6	40.4	71.4	48.3	79.5	14.6	31.5	38.1	21.2	52.8	10.2	24.8	35.2	23.7	35.6	-2.8	39.3	20	12.3
114	658.3	531.7	193.7	226.5	189.1	266.1	167.9	211.4	499.7	267.9	203.3	243.5	140.4	343.3	207.2	161.5	286.6	314.1	214.5	82.5	110.9	257.4	269.1	180.9	679.4	323.5	250.4	243.7	646.1	45.9	277.1	335.4	280	246.3	488.5	204.7	196.4	292.1	643.6	176.4	258.5	167.6	226.3	282.7	437.9	146.1	194.8	264.1	284.4
115	79.6	101.7	-114.3	104.3	70.4	-159.4	-87.8	-149.5	58.5	66.7	57	52	-123	-76.2	-188.8	15.3	-79	27.5	32	106	-53	79.8	81.8	42.2	-75.2	132	-107.4	-36.7	16.5	-10.3	125.5	-183.4	-203.1	-293.7	-306	-7.3	-305	-92.2	-241.2	70.5	-189.8	-385.1	-262.4	-47.1	-56.8	-62.2	-118.3	186.8	59.5
116	43.7	141.9	126.1	131.3	82.7	454.8	85.5	108.6	43.8	236.6	138	33.4	89.6	2632.8	-3	-5	173	260.7	15.1	109.2	81.2	140.8	252.5	140.5	318.5	552.2	62.3	145	40.6	-29.5	90.8	145.4	126.9	147.7	-30.1	205.6	2.2	616.6	324.6	80	457	181.9	120.4	14	62.1	90.2	31	137.1	215.5
117	67.4	40.9	26.1	60.6	26.6	76.4	113.8	54.4	93.2	36.1	85.6	87.6	43.6	63.1	65.9	34.2	59.5	52.8	54.5	47.6	39.3	34.3	64.6	63.3	97.7	71.9	97.1	40.6	30.6	19.8	20.1	68.2	75.8	65.3	21.6	57.9	120.1	64.1	72.7	45.4	29.3	67.6	51.4	4.5	47	48.2	62.4	48	49.1
118	88.8	112.1	72.4	53.4	87.3	81	33	108.3	22.6	46.8	52.8	124.2	152.8	66.8	76.6	44.8	56.9	105.2	90.3	46.2	56.3	12.3	70.8	33.7	28.1	91.4	29.9	75.9	71.6	-155.2	121.6	75.6	59.7	45.5	183.8	146.8	-133.1	137	72.5	46.2	91	14.6	81.1	27	81.5	82.5	72.7	75.3	68
119	22.6	20.3	0.8	8.5	25.5	20.4	10.4	26	17.9	11.5	23.2	22.2	8.4	12.4	39.2	54.9	45.4	10.5	17.8	18.6	17.9	21.3	17.7	14.4	-3.1	51.1	1.4	-16.4	61	-38.8	31.4	-0.2	31.1	-24.2	20.3	20.1	6.3	24.9	46.1	4	31.7	25.4	28.4	4	23.8	18.9	45.3	21.2	7.8
120	-90.1	-22	-29.5	43.4	281.7	-104.1	-130	-35.8	-24.1	10.3	-21.1	-22.9	-65.3	-61.7	-74.1	-9.8	-81.2	1.5	-28.9	-14.1	-79.9	14.4	-2.3	25.9	4.1	-50.6	-71.8	-7.3	-141.4	-259.6	-74.3	-186.9	-243	-148.9	-152.4	-103.1	-108.6	-131.1	-119.4	-7.4	-172.4	44.7	-55.4	-11.6	-24.1	-130.1	-65.5	-43.9	8.8
121	13.8	43.1	17.4	6.8	5.1	-17.4	8.1	18.3	5.8	16	4.4	9.9	4.5	36.3	0.1	24.5	42.7	27	21.9	9.4	44.9	12.2	-0.6	14.4	48.3	36.3	20.9	0.2	34.9	-42.7	-23.3	39.9	17.4	24.8	19.3	21.2	10.4	-0.1	-5.9	-10.7	27	-24.2	27.3	8.6	11.1	6.1	-0.2	17	8.5
122	-14.5	17.8	24.9	-6.7	12.9	-17.2	12.5	46.7	-66.6	15.8	76.1	-12.2	23.4	-20.2	4.4	8.8	113.5	25.3	-85	52.1	6.4	-1.7	9.4	-19.7	147.2	88.1	-8	-27.9	120.1	16.8	55.1	19.9	63.1	-8	29.2	33.6	2.6	85	128.3	-4.3	24.3	-99.5	41.7	34.2	11.5	47.6	27.1	46.3	-16.4
123	234.7	199.9	208.1	59.8	23.7	163.9	171.3	62.5	70.3	44.6	178.2	81.3	93.3	173.2	127.4	74.9	-50.8	123	58.7	31.6	116.9	162.8	29.6	4	251.7	213.3	186	51.1	36.2	274.8	166.5	189.2	155.9	156.6	349.2	104.4	-14.3	148	212.3	119.1	203.9	140	56.8	89.2	144.3	135.8	109.1	-28	61.8
124	206	238.5	290.6	189.9	189.1	344.8	355.5	186.8	383.6	165	278	249.3	265.1	199.5	118.3	40.1	244.6	162.1	206.7	128.5	132.6	206	205.3	137.5	568	154.4	224.9	92	50.7	582.3	142	258.2	290.7	208.2	-53.2	131.7	403	228.7	319.8	305.1	246	363.5	258.6	185.5	192.8	167.2	243.7	303.1	300.1
125	894	140.5	99.7	423.6	384.1	740.8	490.4	1404	41.9	484.9	486.6	737.2	143.1	314.9	593.3	589	45.5	708.2	706.9	714	218.7	219.8	364.4	240.7	110	-21	316.4	377.5	247.7	252.9	374.4	67.7	1700	82.8	-26.9	203.2	1275.1	310.7	105.9	632.5	12.7	286.3	1280	110.1	314.5	197.8	729.4	998.5	831.4
126	-143.2	-41.2	6.6	50	21.9	86.1	-18.1	18.3	-30.1	31.6	-27.6	-26.8	58.4	-40.5	43.6	126.5	-43.9	-0.2	16.8	12.4	-6.6	-0.9	-7.7	89.5	112.4	-135.1	58.7	103.2	-153.4	-305.7	-62.4	5.4	21.2	-61.9	-293.7	-48.4	-128.5	-21.4	-101.5	-1.1	-76.2	-34.2	-19.8	-32.4	-0.3	-20.8	89.5	31.8	44.4
127	44.2	59.9	109.3	4.8	31.5	-89.4	164	34.1	33.4	10.8	85.9	44.7	13.6	28.9	1.8	71.5	46.3	23.9	31.1	57.6	85.1	212.8	-38.6	72.7	192.6	133.5	37.9	-56.4	-84.3	22.6	14.7	103.1	45	-70.7	257.3	-49.8	-70	-85.3	450.6	74.3	82.2	349.1	-29.5	158.8	-9.9	120.8	-7.9	27.8	-35.8
128	-31.5	13.2	13.6	-1.1	17.6	-6.3	-48.6	-1.2	21.7	-0.8	-1.1	2.2	-6.5	17.7	-8.3	10	-12.3	-11.8	-13.1	-1.5	7.6	5.4	0.5	13.6	62.7	55.3	2.2	-34.8	110.7	-101.2	15.8	-10.3	-47.6	21.8	-20	-14.2	46	1.9	39.6	2.2	2.9	27.3	6.4	-24.5	-16.3	-47.1	-18.7	2.3	-14.3
129	161.9	101	198	117.2	105.4	98.3	150.5	71.8	438	113.6	136.9	83.3	130.9	160.1	126.9	33.2	389.3	122.3	105.1	89.9	120.1	116.9	111.5	89.6	103.9	179.5	111.8	133.8	174.1	87.5	105.8	141.8	234.4	205.1	215	185.4	67.5	119.2	153.6	71.9	199.6	181.7	125.6	213.8	70.7	197.8	140.4	63.3	74.7
130	128.5	149	117.2	122.9	82.2	95.9	165.3	80.7	191	42.9	4.6	58.7	145.5	129.7	58.1	42.4	106.9	45.8	93.9	33.5	103.9	76.2	88.8	76.1	205.9	141.4	202.9	84.3	-225.9	197.2	71.5	117.9	52.5	149.9	205.6	39.7	202.5	133.4	257	179.2	17.5	209.1	114.4	127	156.2	182.5	105.7	64.1	86.3
131	142.8	65.7	105.9	86.2	80.9	19.3	82.1	77.8	158.4	92.9	98.1	92.3	85.5	128	104.4	41.2	155.3	63.4	57.8	49.2	100.8	69.7	118.5	86	253.5	47.3	131.8	107.6	102.1	204	52.7	109.5	126.7	159.4	196.8	63.1	183.6	101.9	102.2	94.8	116.1	141.3	140.5	68.3	105	92.1	53.6	97.7	84.9
132	1.8	28.6	-26.9	-14.1	28	55.6	97.7	20.8	25	131.4	151.8	94.3	-13.9	49.1	40.7	-11	168	87.9	43.9	65.8	34.2	38.2	109.2	58.1	34.8	-156.4	61.8	-81.5	-39.4	71.7	-29.1	42.2	179.8	59.9	107	88.4	-50.6	71.8	120.4	154.8	-1.9	-73.8	32.7	11.5	70.5	46.1	49.8	92.2	105.7
133	26.4	31.7	27.2	16.1	40.6	23.2	16.8	33.1	40.4	2.8	26.7	22.9	44.2	37.6	60.6	32.9	41.2	25.5	30.5	25.9	19.8	18.3	22.5	20.2	0.7	7.1	13	29.3	19.1	39.4	10.4	31.4	43.3	46.7	95.6	49.2	55.3	39.4	-27.4	29.4	48.4	-10.9	34.6	48.3	103.7	73.5	52.7	34.9	20.6
134	26.4	38.4	36.1	26.4	42.5	6.6	27.4	20.2	51.9	25.3	22.5	22.4	42.5	45.8	60.1	42.7	40.3	18.6	22.7	44.1	33.2	39.5	40.1	38.2	28.5	-18.1	36.4	28.9	38.2	5.8	84.9	72.5	46.5	32.4	95.7	50.8	20.6	48.3	87.1	38.6	56.7	-8.5	68.5	42.4	102.1	36.8	35.3	17.1	12.9
135	-39.6	-19.6	-3.6	-8.9	-1	27.7	-19	-0.2	-12.6	-1	3.1	-3.9	3.2	-0.5	-17.8	15.5	8	-0.9	1.3	2.1	-13.1	-5	-12.6	-10.6	5.1	-14.9	-13.9	-32.8	8.4	18.9	26.8	-10.4	-10.3	-21	-47.3	0.7	-57.7	8.1	-41.3	2.8	13.3	-21.3	-1.4	7.3	-16.7	-22	-10.9	3.5	-8
136	169.2	278.7	273.8	131.4	256.4	218.2	159.6	150.6	162.2	118.1	80.3	91.5	320.2	307.5	338.9	133.6	96	145.6	176	180	422.6	237.4	198.3	333.8	319.7	398.3	186.9	186.2	265	261.6	241.7	359.3	176.9	329.3	298.1	128.8	283.6	107.1	176.3	146.8	383.9	126.2	228.3	335	284.1	181.9	286.3	270.1	209.3
137	156.4	188.5	89.2	331.4	130.6	217.8	230	111	63.9	99.4	344	225.6	74.9	126.7	189.5	54.8	86.7	84	117.3	179.5	100.7	65.3	144.9	112.5	177.6	227.9	158.9	161.9	60.1	68.6	113.3	89.4	172.4	142.6	86.9	74.4	119.4	131.3	135.4	24.8	60.3	111.9	123.2	47.9	49.2	74.5	107.1	156.2	165.2
138	308.9	358.4	390.5	421.9	151.7	160.6	476.9	218	308.3	31.9	183.6	49.1	229.4	277.1	297.9	112.2	155.7	110	205.7	133.1	263.6	220.4	310	64.9	456.5	403.6	172.6	137.4	151.3	437.2	330.2	332.1	250.4	243.9	306.4	258.1	243.5	525.8	566.5	327.5	218.1	269	258	56.5	477.5	224.4	48.7	116	222
139	207.3	153.8	234.9	145.9	70.7	125.7	285.3	122.5	69.6	117.4	86.5	134.3	165.5	280.5	172.8	172.4	167.5	224.6	182.2	103.5	121	133.2	130.3	240.9	230.7	328.3	185	227	210.7	299.2	249.4	276.6	250.5	198.2	138.3	92.4	60.8	133.1	311.6	92.6	218.3	499.8	105	265	169.6	369	102.5	112.7	223.9
140	63.2	5	143.1	99.1	103.5	199.7	54.1	175.1	167.2	66.1	51	65.9	149.4	141	90.5	119.8	27.7	137.9	42.7	99.3	128.9	145	92	100.8	125.3	70.1	101.9	141.9	162.6	190.7	43.8	118.3	58.6	67.8	203.4	122.8	44.7	89	10.6	-8.2	97.9	88.3	64.8	52	144.3	145.9	90.5	99.8	142.3
141	-217.9	-43.9	-21.9	-16.1	8.3	-6.5	-209.9	-6.8	-17.1	-89	-3.5	-63.2	-24.7	1.7	-44.3	-2.8	-103.5	11.1	-8.7	-4.7	-95.4	-41.9	3.1	7.3	-30.1	-128	-66.6	3.4	-111.7	-142.3	-23	-163.6	25.7	-74.9	-97.8	-51.3	-88.5	-20.9	-2.7	-90.9	-73.6	35.9	-87.4	-63.9	-25.2	-65.6	-28.3	-65.4	15.3
142	-5.4	44.8	35.3	-5.6	15.4	18.8	56.3	39.7	94.6	0.1	17.3	20.1	36	29.6	-18.3	12.1	8.1	25.8	24.8	75	0.8	28.9	39.1	-0.8	30.6	47.1	32.5	38.4	25.5	-25	5.2	-15.4	31.5	55.8	-3.2	29.3	70.2	46.7	93.7	68.8	25.4	17.6	11.1	8.9	43.4	36.8	42.4	-2.9	6.2
143	48.6	54.4	98.5	26.9	36.2	78.8	30.9	65.3	53.2	11.7	15.1	30	105.1	38.5	46.1	40.9	64.9	26.6	28.1	29.2	64.2	10	38.6	62.2	37	67.5	15.8	9.3	81.8	-65.5	26.1	89	37.1	82.8	32.1	14.9	57.3	62.1	-10	41.8	45.3	173.6	13.4	78.3	28.4	9	50.2	60.1	11.3
144	79.9	171.2	140.2	61	125.5	276.6	84.5	279.7	154.8	73.2	66.3	75.2	113.7	141.9	89.1	156.4	174.3	115.8	109.8	135.3	102.4	39.7	70.8	82.4	20.3	134.2	77.7	77.4	169.1	154.3	100.7	81.7	55.3	90.5	104.3	181.2	50.2	153.8	152.3	189	98.7	123.4	99.1	127.2	298.4	173.7	244.4	80.9	61.4
145	-6	62.3	132.6	113.7	23.7	100.2	-6.2	69.9	-28.7	34.3	22.1	30	132.6	150.2	58.8	62.1	29.6	81.9	43.4	10.4	153.8	106.4	158.8	113.6	-35.3	97.5	93.3	86.3	431.1	94	59.2	45.1	81.5	81.6	44.3	96.1	197.8	70.5	276	-29.8	336.6	38.8	181.7	128.6	106.2	36.5	112.4	24.3	105.9
146	28.1	17.2	74.7	59.3	169.8	75.1	50.7	81.1	60.4	44.5	9.7	24	87.6	85.2	19.2	15.3	43.3	37.7	38.1	92.9	78.9	72	87.8	29.5	30.3	115.8	57.1	221.2	-75.5	203.2	43.1	39.5	85.4	109	171.1	53.8	96.5	144.3	95.4	66.7	102.6	204.8	105.1	28.8	58.8	73.9	150.8	30.3	43.4
147	111.9	111.9	51.2	130.2	195.4	105.7	106.6	94.5	88.2	136.8	95.4	126.8	196.6	101.4	117.9	168.9	84	63.7	124.1	196.2	104.3	108	86.7	105.3	85.5	240.4	170	145.2	101.8	285.7	126.3	157.9	98.9	121.8	140.1	283.4	87.9	222.2	70.1	119.8	221.9	163.3	130	110	105.1	153.6	313.9	92.2	106
148	480.9	362.4	342.2	359.3	422	421.4	494.5	221.8	527.5	265.1	266.4	288.6	607.9	377.2	344.8	242.7	437.9	170.1	107.5	182.3	272.6	323.4	375.6	336.2	613.2	751.5	352.3	477.7	367.4	682.3	321.4	369.5	358.8	528.6	628.6	395.5	259.3	217	316.2	231	348.3	465.5	335.4	238.3	218	412.4	386.1	348.7	197.5
149	15.2	0.8	3.6	13.8	6.8	-5	-18.7	-2.3	10	-8.9	-17.5	6.4	45.8	24.8	-21.2	17.9	-1.8	8.4	8.8	30	28.2	13.8	10.9	6.2	-3.1	0	9.1	5.7	-15	-15.5	36.6	29.9	14.9	0.2	36.1	57.5	47.9	51.2	29.5	23.3	11.8	-29	-3.8	12.1	16.8	16.7	18.7	1.5	10.4
150	-44.8	316	43.2	81.7	-28.2	91.1	-87.1	32.7	213.1	-44.7	-82.4	-109.9	-23.6	-41.3	-6.8	-30.8	-13	59.7	5.6	-19.7	-31.1	56.6	44.1	46	197.8	79.8	-39.5	51.9	-198.5	-430	4.4	-8.8	-174.6	-150.6	-329.8	-87.1	-62.9	-161.5	-13	-1.7	-157.8	128.7	-157.1	-4.9	40.6	-155.7	-31.2	-210.6	23.6
151	113.1	19.6	86	50.4	30.2	53.1	73.2	62.1	81.3	66.8	35	49.3	162	77.4	84.9	26.5	41.5	55	52.7	73.4	133.3	149	77.9	109.4	101.9	160.9	114.7	101.5	35.1	158.8	71.1	68	96.8	123.3	124.8	70.7	60.3	122.2	123.3	36.9	48.7	68.1	91.3	72.3	93.5	56.8	81.2	80.7	0.3
152	-8.1	-21.5	2.4	13.7	7.4	3.8	22.6	-23.2	48	-23.8	-0.6	3.3	39.6	40.9	27.4	-1.1	-11.1	-6.5	-14.6	7.4	40.6	4.3	9.1	9.4	67.6	-27.1	19.4	-41	-246.1	92.2	30.1	-10.9	20.3	45.1	-39.7	31.1	25.8	37	17	47	18	28.6	34.3	10.9	0.5	11.1	27	13.5	-185.2
153	-23.9	0.2	11.1	31.1	53	-5.9	-59.5	39	-13.8	3.7	-9.3	5	7.6	10.2	-21.7	23.7	58.7	53.9	51.3	12.6	-14.5	60.5	51.6	0.7	110.2	141.6	25.1	-8.1	32	198.3	-58.9	21.1	-67.9	111.8	151.6	-18.4	55.5	5.6	65.2	65.2	21.4	6.2	-37.3	31	-80.8	-9.5	2.6	7.9	-78.6
154	180.7	43.6	158.4	98.3	-4.7	296.4	77.8	150.3	180.8	50.3	46.7	36	105.5	23.2	178.7	161.6	-37.8	198.7	385.1	126.7	-24.4	26.1	73.2	48.5	410.1	366.3	72.7	190.7	264.9	26	-32.5	-34.9	-39.7	31.1	169.1	191.5	353.2	247.1	442.9	121.5	167.1	381	-7.2	204.1	282.5	135.8	286.5	-18.1	191.4
155	86.8	144.1	103.4	179.8	167.2	149.1	77.3	87.8	172.3	79.8	116	111	128.8	137.2	134.6	126	350.6	151.7	148.9	141	91.8	70.6	125.7	86.2	92.6	164.8	50.1	183.5	171.4	142.5	120.3	144.2	164.1	154.7	84.7	147.4	151	166.2	185.8	129.6	249.8	63.8	66.9	103.1	184.9	219.7	148.8	127	104.1
156	-42.7	15	-34	-0.7	-0.4	31.5	-84.9	32.9	95.7	1.8	30	56.6	69.3	181.3	66.4	9.9	5.1	7.5	11.4	64.3	-62.3	-21.7	0.8	-19	65.8	213.9	-28.1	25	270.3	-21.7	34.8	57.4	45.5	-67.6	-162.4	52.9	339.8	135	-56.6	39.8	64.3	275	58.2	138.1	149.8	48.8	116.4	-87.7	-7.4
157	151.6	260.8	317.6	354	391.9	331	369.8	253.9	284.5	112.1	226.1	242.6	333	248.2	256.2	209.5	147.7	266.3	270	198	298.9	1019.2	225.7	118.1	143.2	591.6	147.1	346.1	109.4	621.7	254.7	208.5	149.8	239	508.6	266.3	416.6	436.4	582.1	536.8	477.4	466.1	420.8	333.2	266.4	289.7	186.1	224.8	216.2
158	-21.3	-80.6	-34.1	-49.5	-71.3	-40.9	-53.2	-35.5	-12.8	-35.5	-42.4	-9.7	-64.7	-56.7	-55.3	27.3	43.7	-31.4	10.7	1.8	19.8	-42.1	-38.6	-47.1	8.8	-122.5	-65.1	-4.1	-98.3	4.7	-49.2	-38.3	-64.7	-101.8	103.7	-58.6	198.1	-112.1	-68.6	-86.4	-35.9	-54.3	-47.3	-60.8	-13.3	-79.4	-43.7	-11.3	-47.4
159	422.8	700.6	1124.9	569.8	438.7	712.3	311.4	294.4	515.6	227.4	450	548.3	311.2	845.9	345.4	821.6	435.9	258.1	437.9	310.7	372.9	465.5	225.2	421.4	308.1	1055.2	450.4	529.8	836.8	961.2	673.1	938.6	608.6	560.8	413.2	335.9	1212.8	620.5	494.7	284.2	1496.2	762	557.2	451.1	1018.8	769.1	382.9	350.8	332.4
160	-32.5	-120.2	-113.2	-62.2	-141.2	-142.1	-132.6	-48.5	-115.4	-38	-33.8	-115.1	-74.1	-84.3	-82.1	-17.2	-78.7	-82.9	-56.4	-45.4	-34.7	-37.6	-92.5	-35.6	-74.7	-249.4	-35	-77	-138.7	-237.5	-65.3	-123.3	-89.9	-128.8	-271	-76.9	-81.4	-97.9	-123.7	-97.5	-126.9	-45.8	-103.7	-78.2	44.5	-78.6	-65.7	-70.5	-87.9
161	1120.5	923	1456.3	1788.3	1193.3	1056.4	1237.8	1323.6	156.2	1085.4	1765	779.9	1667.2	2406.7	1722.7	1912.8	992.8	1478.2	887.2	923.8	1456.5	1635.8	830.5	1375.4	671.7	1454	1624.1	2274	1246.9	1940.9	929.9	1732.1	1045.8	1096.5	1055.9	1407.6	784.7	526.4	2367.2	1170	856.4	2095.4	750.5	2578.7	341.5	3231.7	1044.8	708	644.4
162	-95.4	170	96.2	132.1	23.4	1.9	6.9	34	108.2	88.2	75.7	-42	129.1	48.4	93.2	71.8	155.8	101	68.5	44.2	73.5	70.2	102.6	77	314.5	9.8	63.8	112.3	-91.5	-100.8	65.7	80.6	88.5	62.8	178.6	19.2	-152.4	-31.8	-23	61.4	140.2	-106.4	94.1	36.3	64.6	-25.5	-18.1	-23.1	77.2
163	121.7	423.4	695.4	386.7	180	65.2	52.6	77.4	324.5	79.9	113.6	77.6	312	312.8	76.8	63.8	961.2	484.8	192.6	206.7	157.3	142.7	268.7	101.8	321.7	125.4	60.3	95.5	57.7	3.8	108.5	442.9	135.2	337.1	203.4	532.2	178.5	106.2	116.1	83.1	409.7	101.5	34.2	67.1	244.6	83.1	132.2	76.4	60.6
164	1836.7	656.6	1790.9	2672.9	530	1072.6	1853.2	2795.2	832.7	1171.7	567.1	1918.9	610.7	1200.6	3073.3	1728.3	457.8	4039	564.9	2554.1	826	1644.3	213.3	1640	884.6	225	1705.2	2646.8	1712.8	1323.6	2204.4	1851	624.7	1058.2	944.8	1451	1976.7	924.4	450.8	2017.7	517.8	2274	2222.8	1021.2	899.3	4126.5	4866.2	1269.1	2981.4
165	23.9	27.2	7.9	25	-2.9	15.7	-6.4	-3.3	-9.1	63.1	54	21.5	23	14.2	76.9	-10.6	2	22.2	52.5	14.6	9.8	-8.4	-1	37.6	15.1	17.6	-20.4	15.1	-14.4	19.4	-9.6	9.1	105.1	39.5	67.1	11.3	26.3	-1	54.9	-8.7	40.7	-8.4	-19.8	118.5	-18.6	33.7	-12	25.2	15.4
166	286.1	100.3	92.9	47.4	107.9	102	191.8	490.3	182.9	138.4	162.3	187.8	159	152.2	256.2	563	100	147.3	333.7	740.2	143.1	81.2	67.6	156.9	131.1	134	232.8	136.1	174.7	87.3	161.4	110.9	110.7	53.3	132.7	270.4	78.5	257.1	103	97.3	175.6	215.2	173.5	114.4	155.4	135.2	141	227.1	143
167	127.1	137.8	115.7	83.9	81.3	84.9	169.4	106.4	97.7	57.1	101.7	130.8	102.9	79.1	114.8	51.3	73.9	190.1	139.1	106.9	96.1	67.3	97.1	62.3	220.3	176.8	118.5	86.7	112.7	263.1	86.7	142.2	140.8	147	122.4	60	116.1	136.8	183.9	104.2	93.5	171.7	150.9	115.5	134.9	143.3	166.7	103.9	97
168	258.2	322.6	443.5	266.2	269.6	276.7	367.6	682.1	244.1	328.7	296.7	325	338.4	380.3	319.4	507	266.2	443.1	355	397.6	277.6	192.4	325.9	333.6	236	445.9	158.7	285.9	354.4	406.7	386.4	419.6	382	340.5	259	359.3	339.9	426.8	249.2	254.4	1369.2	249.9	378.6	312.6	136.3	327.4	458.5	305.3	335.5
169	109.2	230.3	830	445.5	316.1	526.3	428.5	257.4	393.7	285.7	363	181.2	417.1	228.1	267.9	373.7	694	604	622.9	299.8	327.3	146.8	615.2	414.5	297.9	234.3	216.4	204	500.3	690.4	503.3	889.9	591.9	863.3	302	511.4	299.5	276.4	524.2	250.2	745	276.8	352	328.3	515.1	334.1	946.4	372.5	367.1
170	121.7	275.4	249.7	234.4	313.6	255.1	186.3	317.9	138.3	156.8	181.3	179.6	249.4	262.9	278.2	450.2	160.6	407	285.1	252.7	188.4	110.4	250.7	204.6	150	224	142.7	166.9	168.6	286.9	221.7	399.7	238	169.3	139.1	293.4	212	302.5	270.1	275.9	560.4	242.5	183.2	200.9	121.5	413.4	288.4	169.7	194.4
171	329.8	579.6	291.8	237.6	230.2	407.1	326.4	522.2	313.5	282.3	349.6	324.5	505.1	443	450.7	430.4	557.2	648	492.6	214.8	310	293.3	298	273.2	372.9	302.5	336.6	251.2	444.2	425.9	359.1	524.8	258.2	814.8	124.3	509.6	206.3	312.6	430.9	248.5	750.3	279.3	296.5	308.7	390.6	436.6	406	258	208.5
172	-3.2	76.4	25.3	42	-26.6	12.3	-32.1	4.2	48.3	51.1	2.7	20.8	6.3	56.3	-6.5	-10.7	-9.2	48	11.3	4.8	10.1	6.3	29.7	1.2	-65	-63.5	6.2	42	-2.2	-114.3	2.2	13.2	5.1	-15.4	-87	-36.2	45.8	-29.2	-67.4	-11.3	-76.8	33.6	18.8	27.7	50.3	-35.5	-60.8	-7.4	48.9
173	31.6	68.3	91.1	95.1	15.8	30	71.1	42.2	101.5	111.9	46.6	69	134.1	75.3	49	21	82.6	109.1	45.6	67.1	165	169.1	34.8	101.4	93.7	93.8	78.5	196.2	87.3	-16.5	91.8	33.8	24	120.3	22.6	21.9	44.6	87.4	23.1	84.2	-18.2	77.5	-63.7	125.3	94.8	2.7	96.3	35.3	100.3
174	350.4	1083.2	410.8	415.7	458	987.6	781.7	1020.2	82	674.3	343.4	862.5	240.5	273.2	368.9	963.8	91.4	967.8	457.6	1114.9	441.9	630.7	724.2	535.7	115	709.8	432.4	645.1	1093	754.3	1306.2	657.8	583.2	385	19.1	431	915.9	790.9	356.2	754.9	373.7	242.7	872.2	348.1	121.3	669.2	422	868.7	825.5
175	83.6	60.9	402	100.1	146	89.6	75.7	283.6	775.2	80.2	131.4	93.8	622.7	368.7	266.5	116.5	214.4	258.9	159.7	80.3	280.3	195.9	151.5	480.2	704.9	801.4	223.5	355.2	123	235.9	249.5	202.2	171.7	302.2	291.9	444.5	48.6	537.6	732.7	193.8	841.3	130.5	290.2	1065.4	773.4	349.4	391.5	126.9	185.3
176	267.7	230.1	274.1	76.7	47.9	173	288.3	176.1	159.9	170.2	152.1	198.1	112.5	148.1	114.1	61.9	54.5	337.1	188.2	99.8	248.3	139.1	167.3	194.9	244.1	118.2	229.3	165	147.5	129.2	125.6	253.6	362	191.7	173.5	192.6	101.3	91.7	166	96.6	250	211.1	60.1	93.6	78.1	65.6	194	126.9	225.2
177	63.6	7.2	136.5	41.8	13.9	122.3	45.6	164.4	163.2	144.6	141	132.6	140.8	106.1	101	70.4	88.7	241.1	194.2	97.9	53.4	82.1	182.7	99.5	140	141.4	143.9	73.4	155.2	210.8	90.1	65.9	170.3	25.5	44.7	58	81.4	60.7	202.1	123	65.2	-2.4	95.5	103.7	138.7	90.9	137.9	101	155
178	-8.8	318.2	43.1	67.7	197.1	158.7	-95.5	87.3	142	37.4	5.3	-33.9	27.1	-2.3	99.1	47.6	68.7	174.4	108.8	120.8	-56.8	49.3	116.1	34.1	189	115.3	-55.3	98	265.7	356.8	54.9	-42.4	107.1	-130.8	-119.7	33.2	-1.3	108.4	189.4	73.6	25	100.2	21.8	11	126.8	133.1	212.2	52.6	103.6
179	33.1	37.3	21.9	-19	21.7	7.3	9.8	-4	72.1	7.2	-18	-5.7	12.2	12.3	30.8	-3.6	9.1	36.1	-6.4	-0.6	-13.6	10.8	15.4	1.7	45.5	78.5	42.5	3.7	43.5	-27.5	19.4	0.3	21.4	32.8	-10.6	10.4	4.6	-7.2	79.4	-17.4	66.9	-0.9	14.8	113	4.2	-25.1	-10.8	-6.3	-2.8
180	107.6	90.1	76.9	88	61.2	117	135.6	46.9	136.3	47.2	21.7	40	135.4	119.5	137.3	13.9	40.6	80.6	58.5	37	117.9	82	126.1	127.5	-15	104.5	134.6	160.5	107.3	245.9	51.9	100.9	83.1	178	143.1	73.3	143	96	87.7	79.1	28.7	288.1	191.5	56.7	53	101	49.4	108.1	58.3
181	528.3	250.5	184.2	94.9	105.9	94.2	289.9	157.7	384.3	99	268.4	107.5	453.4	263.9	100.9	87.1	229.2	189.6	128.8	7.6	348.2	473.2	168.8	645.2	127.2	34	86.8	233	396.1	425.4	75.1	205.4	176.2	244.4	-43.5	53.2	288.2	46.4	398.4	133.7	290.7	145.3	188.5	393.9	293.2	275	281	204.3	187.7
182	858.6	443.5	816.7	752.7	461.6	753.7	455.4	538.1	187.5	482.1	704.4	714.5	335.4	908.9	615.1	1075.2	473.1	364.8	503.5	579	595.6	385.6	530.7	586.3	279.6	506.3	295.8	544.4	663.2	1265.5	569.9	733.7	718.1	161	443.8	767.8	519.3	594.6	368.6	314.2	1323.3	1860.3	463.6	418.7	154.6	898.7	826.9	554.4	429.3
183	137.5	45.3	80.5	23.2	85.2	32	87.2	63.2	29.6	32.7	5.1	17.4	-17.6	37.8	1.8	-16.5	-52.9	28.5	-31	20.5	65.9	27.7	17.5	17.4	21.5	63.2	-11.1	0.9	92.1	233.6	46.4	9.9	21.5	9.6	109.3	23.2	-47.3	36.6	73.6	-22.2	-35.3	-17.5	48.1	4.8	26.2	-13.9	-1.1	68.2	22.7
184	42.6	-3.8	24	17.9	45.4	55.6	4.9	13.2	43.5	40.9	27.9	27.2	54.2	34.6	26.6	18.5	34.6	16.9	10.6	16	54.5	28.2	-0.2	60.4	48.8	28.7	37.9	23.1	53.3	44.3	-0.7	28	24.8	31.2	35.7	18.9	30	25.2	61.4	36.1	20.9	44.2	48.9	17	39.2	58.3	18.7	50.6	11.8
185	-160.8	-172.7	52.3	42.4	-1.3	32.5	-233	-9.5	-92.8	-40.7	-56.6	-134.1	58.6	1.9	20.1	-10.1	-49.3	24.3	53.1	-2.3	-7.6	-19.9	7.1	42.1	-142	184.6	-67.3	-71.5	35.4	119.9	71.1	10.7	32.2	63.2	-44.1	-16.2	222.1	6	-44	17	-103.4	-192.8	-8.1	54.7	-54	-104.4	2.1	-12.5	-18.1
186	43.7	140.8	216.6	254.6	179.3	62.9	139.5	87	239.2	39.6	55.1	32.1	267.2	231.2	218	57.3	94.1	239.5	196.9	133.1	114.8	87.3	171.1	52.2	66.2	258.9	249.7	46.6	221.9	308.4	125.3	300.6	127.3	151.7	38.1	884.3	549.1	136.7	155.4	82.7	352.2	83.2	275.1	117.6	187.5	157.1	324.7	51.8	178.6
187	-10.2	-32.8	-0.6	8	-17.4	3	-10.3	2.1	6.4	14.5	21.7	2.2	8.3	-7.2	-2.2	-1.2	15.2	0.8	4.2	-1.5	4.5	1.6	-10.5	-8.6	-6.5	33.6	-5.4	-10.6	58.1	13.1	-20.1	-2.4	-1.4	6.5	18.1	26.4	48.2	9.4	-36.4	6.5	-8.8	-0.2	-12.2	-2.7	7.8	25.2	8.5	24.2	25.1
188	3.3	-9.2	165.4	77.5	111.4	35.4	38.8	123.6	24.7	29.3	4.5	28.2	82.7	53.5	113.8	47.2	-9.6	78.4	40.6	198.4	51.3	28.4	104.8	28.4	-82.1	207	56.2	99.6	178.6	112.3	57.4	100.4	34.8	115.6	61.1	65.4	105.3	52.6	82.2	114.2	75.4	47.3	95.6	27	34.7	80.6	47.7	38.4	97
189	224.8	57.2	65.2	426.9	-76.2	146.3	129.5	104.3	-215.9	272.9	-47.7	-164.4	21.1	333.3	163	-39.7	-49.9	340.4	269.2	208.4	-62.8	371.4	-22.3	9.6	-233.6	-215.8	330.6	-14	387.2	-627.2	-115.2	-71.1	242.2	-121.8	9.1	-56.3	-293.7	-109.2	-289.6	-107.6	-76.5	115.6	-68.2	13.9	-70.4	-99.6	105.4	179.9	258.7
190	-95.6	-42.8	-100.1	-67.4	-52.3	-105	-25	-74.1	18.4	-89	-91.8	-71.9	-38.1	-72.4	-26.5	-24.6	-62.3	-59.7	-76.3	-52.8	-3.7	-3	-0.6	13.9	-164.2	-147	-54.2	-58.9	-66.3	-169.5	3.7	-97.6	1.2	-132.7	-164	-32.8	-135.2	-139.8	-28.7	-50.2	-27.5	-125.8	-47.6	-61.3	-76.2	-105.3	-68.8	2.8	-73.9
191	914.1	1856.9	1246.1	1095.5	786.4	918.3	720.1	816.4	729.3	910.3	900.4	1038.8	903.3	954.3	853.8	1287.2	1034	1458.9	772.9	1115.6	809.3	1071.6	1273.3	647.2	1828.1	1737.7	1116.1	1016.9	742.3	1452.6	769.6	1299.9	795.5	1101.4	1225.6	1048.4	854.4	995.8	1137.3	1136.7	873.9	922.6	823	665.6	861.6	608.6	1340.6	961.9	832.7
192	11.5	67.3	10.3	16	20.8	46.8	26.8	12.9	32.9	23.7	3	4.4	33.3	6.3	52.9	85.5	6.2	16.1	24.9	20.2	31.1	24.2	20.7	35.7	8.9	17.3	14.6	66.9	128.4	18.1	41.9	26.1	14.9	21.4	27.5	37.6	108.4	20.4	35.1	26.1	22.4	10.1	56.4	23.3	53.5	49.5	12.4	22	18.6
193	10	27.5	16.4	9.2	21.3	2.4	20.2	8.6	-9.6	-2.5	-14.5	9.7	11.6	11.7	16.9	21.4	-1.6	-0.1	2.6	-4.4	20.4	22.6	7.6	14.7	-16.8	17.4	-3.3	16.6	76.9	5.1	-4.2	0.6	34.9	32.1	-4.6	21.1	50	13.6	35.5	-11.7	25.6	14.5	34.7	24.6	-5.8	20.5	12.5	-6.6	0.7
194	9.9	-41.2	-131.3	-91.6	-54.1	-160.5	2.4	-50.4	22.5	-46.3	-92.8	-124.3	-95.7	-8.9	-118.4	-49.9	-150	-1.7	-61.3	-51.6	-17.7	-26.9	-8.7	-23.8	-33.1	37.9	-32.7	-26.4	-37.4	-142.5	-10.2	-157.9	-132.3	-221	-329.7	-108.6	29.2	-126.3	-173.5	43.6	-225.3	-47.2	-70.8	-106.6	-1.9	-20.4	-98.6	-68	-94
195	467.4	548.8	1265.1	734.2	459.9	269.4	255	322.4	1040.4	690.8	224.7	334.5	434	380.5	387.2	1924.9	678.8	448.5	401.2	772.1	287.7	374.9	433.6	274.8	404.4	430	195.6	511.4	290.7	685.6	284.4	453.5	244.6	534.2	727.6	850.1	1095.5	681.5	581.3	495.5	718.3	407.4	303.8	458.5	854.9	869.5	538.6	270.3	301.4
196	313.7	412.5	338.7	544	454.6	347.2	300.5	272.7	574.9	261.8	338.7	181.2	389.7	384.9	464	451.8	1116.2	353.8	454.3	407.7	327.5	405.5	381.4	301.6	735.1	766.5	259.1	313.8	339.9	425.9	361.4	440.3	359.5	421.4	625.1	301.4	379.6	581.4	493.2	431.8	631.3	242.1	240.5	262.9	434.1	306.5	327.7	192.8	281.1
197	175.5	63.9	76.9	65	79	51.5	56.2	61.8	40.3	80.8	100.7	129.4	101.8	65.4	91.6	107.8	98.9	58.4	138	126.3	63.4	85.5	75.4	59.4	33.5	68.1	48.8	62.1	52.9	40.3	63	81	86.9	64.8	71.5	87.7	44.6	96.5	60.1	36.7	90.1	88.5	38.6	90	149.3	111.7	112.6	73.2	83
198	61	41.8	48.5	41.3	58	23	129.5	40.6	43.3	22.6	29.9	45.5	33.5	37.1	103	17.9	41.4	13.7	18	50.5	105.9	33.6	50.9	7.4	8.2	85.3	26.4	55	49.4	80.6	94.6	61.5	141.4	55	85.1	53.9	28.4	57.9	31.7	45.9	51.4	29.4	119	25.2	59.8	70	14.7	84	28.2
199	-9	-1.6	7.4	3.8	-19.2	20	-15.2	6.6	10.8	-6.8	-34.5	-14.5	4.5	-3.9	-1.6	-8.1	-6.9	0.5	75.9	-0.4	2.4	-6	5.4	16.8	-5.6	28.9	-1.3	10.1	3.7	-45.6	-4.6	-2.9	39.7	-2.3	-80.8	18.4	18.4	6.6	-0.7	-27	6.3	2.9	6.6	-3.9	-20.5	32.2	-6.7	-0.8	2.8
200	151.6	342.4	427	198.4	141.4	176.8	218.2	160.3	231.6	214.6	212.5	261.6	187.1	202	178.2	288.5	283.3	279.8	292.1	616.4	232.2	242.7	317.1	283.7	265.7	287.7	167	204.5	183.4	198.4	259.5	122.8	169.4	194.3	186	380.6	158.6	131.1	409.7	178.7	371.2	196.3	86.1	235.2	215.3	269.9	384.8	155.3	216.2
201	4.7	12.6	17.2	21	30.8	48.8	28.9	36.3	55.6	34.5	3.2	37.7	18.2	54.4	34.4	21.8	31.6	49.1	62.5	24.3	27.7	38.2	26.8	79.8	5.2	45.7	55.9	81.7	86	17.6	-8.2	56.7	37.6	15.1	-7.2	12.2	66.4	34	17.6	20.6	44.8	13.9	44.9	25.9	39.1	116.5	42.3	21.9	31.7
202	243.8	285.3	402.9	212.9	373.9	324.3	204.2	446.3	265.8	235.4	213	176.7	245.8	224.5	447.3	385.8	187.3	228.3	347	320.7	268	397.6	185.8	290.5	292.2	233	263.8	294.2	278.8	249.4	251.6	322.5	140.3	438	263.5	562.9	214	493.8	528.2	299.1	489.7	490	294.4	506.6	663.3	283.4	271.8	227.9	201.4
203	-11.4	52.3	44.3	30	7.1	19.6	8.1	4.7	37.4	9.3	0.2	16.6	28.2	38	42.7	9.6	24.6	41	16.1	10.4	24.2	11.2	31.7	19.4	38.1	46	35.4	-1	74.4	35.9	34.6	64.2	12.6	42	44.8	70	0.5	21.7	22.6	6.5	75.7	32.6	59.3	18	33.1	26.8	18.4	31.7	0.4
204	85.8	53.9	77.8	74.9	116.6	89.3	201.3	79.4	132	56.4	105.6	98.7	84.9	71.3	95.6	262.5	44.6	90	93	117.9	79.1	25.8	112.5	97.6	71.6	117.3	74.1	134.8	162.5	147.3	84.8	29.4	75.3	80.9	74	133.2	103.5	120.2	191.4	238.7	134.4	153.3	102.4	71.7	97.2	138.5	95.2	56.2	42.6
205	52	47.7	49.3	7.6	3.5	37.3	47.1	52.7	14.7	17.9	53.7	47.8	15.8	35.8	17.4	30.4	19.5	57.3	31.8	39.3	37.8	5.8	36.6	57.2	-1.3	17.8	34.3	30.1	-12	12.9	9.9	19.5	49.6	-31.5	-23.8	29.5	-16.2	36.2	17.3	-3.6	76.9	-15	3.1	28.6	14.8	54.9	80.8	18.4	63.8
206	168	100.5	116.7	25.8	54	52.6	1.5	15.7	35.2	75.4	46.3	37.1	96.3	56.8	61.5	21.6	104.4	31.4	97.3	48.4	52	49.6	51	73.5	105.5	208	27.5	53.8	-91.2	26.6	66.1	60.2	82	80.7	115.5	17.1	58.7	81.7	-7.1	-2.5	77	63.5	16.8	37.3	151.1	19.9	97.8	-23.7	25
207	-34.5	28.9	-13.9	-35.1	-41.7	-25.1	-31.3	11.3	-23.8	-41.6	90.4	-27.2	16.3	-7.2	-26.8	-5.1	-51.1	-26.5	-30.6	0.8	21.6	-4.5	26.3	14.6	56.6	5.5	19.5	19.2	-24.8	57	28.3	4.1	23.7	-26.1	-131.8	-28.5	-62.3	-36.6	22.8	-21.6	-9.5	-36	1.3	26.2	-3.1	6.4	-49.6	-23.4	-9.8
208	33.4	69	68.9	43.5	40.3	29.8	67.5	45.1	7.8	37	19.9	35	305.4	96.3	109.6	42	20.3	30.6	54.2	16.8	190	151.7	22.8	147.4	72.4	78.5	70.4	116.1	85.9	121.2	99.3	95.5	45	169.3	20.7	34.4	18.1	35	106.4	22.1	235.8	22.2	105.8	80.5	36.8	24.1	4.7	79.5	47.7
209	103	140.8	159.9	105.6	14.7	148.4	3.4	1.3	175.4	63.2	-4	11.4	153.6	112.6	140.6	85.6	239.1	74.8	218.6	96.5	99.8	105.1	119	92.6	163.8	50.1	182.8	143.3	-37.5	-310.7	61.9	67.3	93.9	51.6	-6.9	138.4	-73.9	83.4	171.2	123.2	65.5	108.3	-79.5	80.3	223	103.2	97.1	-82	45
210	348.4	490	334.7	596.2	577.4	607.4	638.8	291	1090.7	403.2	262.7	815.9	512.5	325.4	459.8	934.9	437.4	224.5	646.5	1481.6	267.2	379.7	432	361.6	681.9	1169.3	482.9	466.7	433.6	328.7	805.4	312.2	413.4	529.5	1243	518.9	630.9	609.5	1033.2	721.3	1013.1	330.3	299.1	303.2	1080	419.3	1034.1	380.6	511.5
211	35.9	39.7	53.3	75.7	32.9	42.6	35.2	57.8	38.7	132.6	133.7	131.7	91.6	32.4	64.8	84.7	82.3	68.7	41.1	70	87.5	86	92.5	72.5	6.9	55.5	39.1	105.4	97.8	28.5	32.9	61	-53.7	67.9	13.4	49.7	34.9	40	146.6	38.8	64.5	94	37.1	78.3	1.6	44.9	102.9	115.9	85.7
212	1616.4	2302.3	1516	1315.2	1293.6	1616.1	671.7	1530.7	1139.5	2588.7	1112	1589.7	688.4	1141.9	826.3	1736.2	1472.1	2200.4	1542.9	705.3	816.1	1640.8	1348.2	657.1	2853.2	854	1184.4	1202.4	1284.2	930.6	1113.1	1300.9	681.8	766.8	847.2	2758.8	785.2	1445.5	635.5	1604.1	2000.7	1484.4	916.7	505.5	1365.7	1444.8	2260.7	942.2	1136.9
213	24.5	33.5	8.8	24.8	38.1	29.7	17.1	17.5	-15.9	29.8	33.1	36.4	19.6	34	29.4	29.5	4.2	13.5	24.3	46.7	39.5	39	38.3	30.1	45.4	53.6	34.1	71.2	63.2	25.9	36.2	28.8	19.1	16	37.5	23.8	33.9	38.9	66	30	25	69.2	35.5	20.1	27.3	50.9	79.5	44.3	32
214	-33.6	-60.5	42.3	19	-4.4	6.3	3.6	24	-2.3	6.9	85.1	58.6	3	47	85.4	25.6	34	15.8	20	60.2	-12.1	0.5	-9.4	39.5	23.2	36.1	16	-11.6	-48.9	-32.4	44.4	-8.8	41.8	44.5	28	-2	17.3	28.1	58.6	-13.7	31.3	20.1	31.3	76.8	35.4	-9.5	22	26.7	13.2
215	321.8	598.4	1406	530.3	251.7	799.9	477.2	777.2	1829.8	487.3	557.2	378	1379.1	1048.8	1629.6	976.7	2269.7	1141.4	1093.3	1405.6	1215.5	1329.8	1324.5	801.7	2296.2	1494.3	390.2	1090.4	1747.4	584.6	1021	1567.3	1088.3	892.5	1193.8	794.5	732	918.9	769	714.2	1522.5	595.3	522.4	943.1	2335.9	723.5	586	613.8	942.4
216	-123.1	-114.2	-98.4	-82.3	-188.1	-109.2	-23.2	-80.7	-174.8	-87.7	-214.3	-171.2	-83.4	-161	-80.3	27.7	-133.6	-65.8	-78.8	-86.8	-112.6	-70.1	-90.9	-101.7	-162.1	-195.6	-133.2	-132.5	-199.3	-322.2	-204.9	-125.6	-92.2	-223.5	-391.8	-132.1	-188.7	-164.5	-332	-101.5	-123.4	-173.5	-200.5	-128.1	-135.3	-168	28.7	-321	-121.4
217	109.2	171.7	78.8	99.4	78.5	81.5	122.1	89.6	304.7	67	111	65.1	118.5	143.6	131.8	48.4	52.5	75.6	96.2	26.7	87.4	119.2	124.8	85.4	167.5	255.4	122.9	130.3	117.3	213.8	97.6	83	120	138.6	-23.8	50.7	13.1	69.9	34.6	241.4	29.5	269.4	87.7	148.6	226	124.6	112.9	50	71
218	2089.6	2896.3	1591.6	3071.3	1322	1914.6	3059.7	1728.9	1234.3	2709.2	1159.5	2076.4	1223.3	1894.8	1420.7	1529.9	1136.4	2595	3057.5	1755.3	1746	1644.4	1562.5	977.5	1944.7	1672.7	2084.6	2471.9	3281.6	2271.3	1151.9	4547.3	3010.5	2061.6	1815.6	1649.3	2287.5	2327.5	1522	3268.6	1325.5	2725.1	2480.7	547.1	971	2067.2	2693.2	2021.7	2638.6
219	4.8	74.7	8	10.5	-15.5	-29.1	-100.9	16.2	16.9	35.2	29.8	31.5	46.1	-37.2	32.4	0.1	28.5	40.5	5.7	5.6	25.9	44	33.9	60.2	-56.7	2.4	7.7	-41.9	-75.7	-132.3	-26.8	-29	-31.8	-79.6	-115.8	-26.3	-29.6	-47.6	-60.6	-31	-7.3	-8.4	-34.9	32	-38.7	3.7	60.9	-3.3	0.7
220	388.3	225.4	420	415.7	256.9	288.1	418.7	534.1	484.4	276.8	200.6	231.1	400.7	458.4	780	602.9	247.2	261.2	260.8	540.6	420.2	348.4	345.4	334.3	363.8	816	199.1	509.2	409.9	430.4	382.7	472	504.7	555.6	942.5	382.4	317.9	647.2	462.6	404	614	293.9	437.3	334.7	613.5	434.9	487.7	201.7	300
221	332.8	408.6	623.7	534.3	563.5	419.5	243.2	284.6	556.8	161.4	190.8	98.1	543	414	287.3	199.4	173.2	422.4	562.9	187.7	435.3	579.9	600.3	525.1	272.7	442.4	448.5	457.7	466	366.5	400.7	513.4	282.7	466	360	446.1	212.4	155.5	361.9	195.6	595	471.5	565.1	454.1	369.2	224.9	405	133.2	203.8
222	-61.1	-11.5	-11.6	-27.6	-48.4	-19.2	-29.6	-28.1	-7.6	-4.5	-23.7	-15.1	-19.5	-15.3	-19.9	-9.3	-15.3	-19	-19.8	-4.3	-15.7	-5.4	-5.8	-15	-61.5	-17.1	-39.2	-46.1	-30	-25.4	-52.3	-28.3	-29.4	-22.4	-29.4	-28.3	-38.9	-44	-109.8	15.3	-24.8	-43.5	-16.9	-18.9	-74.4	-34.2	-22.6	-17.8	-16.9
223	648.4	10188	3592.1	1388	4672.3	4160.4	3698.5	4962.8	6326.6	1964.4	2836.8	353.9	2737.5	3309.2	5168.4	600.8	266.5	3409.1	1008.2	2608.4	2731.9	1216.3	4827.1	4571.1	1330.1	475.4	789.5	5408.1	7029.3	308.4	2210.8	2457.8	550.4	972.3	1074	5109.2	837.8	510.6	1268.1	885.7	251.3	9479.9	4003.7	2697.5	6314.5	6533.4	3947.9	3752	4377
224	7.2	16.4	9.6	-1.5	4.6	1.9	11.4	-4.4	-42.3	-13.7	-7.7	-17.8	3.8	7.8	26.6	27.8	-13	-5.3	8.4	7.3	-1.3	0.7	1.3	7.7	-0.8	0.2	4.4	1	7.7	26.2	-7.4	3.8	1.2	10.9	53.2	8.7	24.8	-2.1	-38.3	11.1	-10.7	14.4	12.4	17.3	8.5	35.7	36	-7.2	-11.5
225	49.6	151.7	25.8	69.8	120.8	-1.4	-27.6	34.6	3.2	-32.9	54.2	-8	145.2	12	13.5	-4.1	8	48.1	13	4.4	74.2	44	63.2	61	29	-18.4	24.4	52.8	76.1	-30.9	-10.5	-20.7	53.3	-32	-23	24	-9.6	26.1	-33	14.4	-2.3	17.1	76.9	19.8	37.1	16.3	18.8	14.5	17.1
226	1928.7	2848	3679.3	2591.8	3438.6	2710.3	2565.9	3119.3	7056.5	6062.9	4842.1	5777.9	3385.8	2920.2	3458	4240.9	7237.6	1328.2	3567.8	3799.1	3180.4	2606.6	3462.1	3044.1	10645	2854.6	2157.8	2919.6	1841.6	4419.1	3934.1	3349.1	2375.2	3228.8	7724.1	2395.7	2373.4	5074.8	2232.5	2896.2	4526.9	1249.2	2687.1	3347.2	7297.7	2590.1	5404.8	3563.5	3283.8
227	-18.9	-4.5	4.2	-30.7	-20.1	29.6	-83.9	10.7	-60.6	31.6	86.4	-3.9	-1.8	-51.5	22.9	20.6	3.5	24.9	6	57.6	-22.3	5.2	-17	21.7	-49	-6.9	-39.2	-29.2	-62.8	-74.6	-36.9	-47.9	-0.4	-57.8	-117.7	45.4	-106.2	-4.2	60.1	-6.5	16.6	-14.8	-43.1	-2.9	65.7	-20.1	-12.8	-21.3	6
228	13	244.8	106.5	116.2	42.2	33.2	4	22.5	107	24.9	60.4	15.8	119.7	149.4	133.1	181.5	187.7	136.8	64.7	143.5	45	58.5	72.2	57.2	112	48.6	22.6	75.9	5	60.7	78.1	108.9	32.3	12.6	70.9	234.9	42.1	51.7	42.1	17.6	187.7	10.5	11.3	50.7	42.1	59.8	26.2	1.7	7.6
229	413.3	421.4	533	321.6	388.3	258	402	348.3	227.8	320.9	742.8	338.2	490.3	363.3	556.8	789	279.8	583.2	768.4	598.9	276.2	279.1	460.2	311.7	256.2	825.2	342.4	414.3	278.8	472.6	835.8	378	252.7	551	374.6	329.2	395.4	742.8	826	383.3	472.8	475	301.6	436.2	461.7	555.5	411.9	255.2	245.9
230	104.6	113.6	73.3	95.7	116.6	130.3	175.8	72.2	54.3	62.4	113.3	89.2	85.6	71.8	137	289	30.8	65.5	118.9	98.7	54.8	98.8	97.4	130.2	55.5	161.5	46.4	124.6	194.3	265.9	144.7	82.7	63.7	62.3	63.2	60.1	78.6	92	157.4	322.3	113	87.4	104.1	114.5	49.3	152.8	84.5	61.5	68.1
231	11.3	83.1	65.9	35.9	37.9	51.6	51.1	62.7	25.3	22	42.4	29.7	43.6	54.7	20.6	80	13.5	84.4	63.9	48.8	49	41.2	52.2	66.6	20.6	32.6	19.4	15.1	54	12.1	24.4	132.3	14.2	26	21.3	80.3	18.6	66.5	38.7	68	34.3	54.1	59.9	60.1	55.5	70.8	63.9	37.3	42.5
232	52.7	13.4	163.1	43.1	84.3	40.5	60.4	49	74.1	14.8	34	17.3	92.6	53.7	65.2	37.1	21.2	118.2	44.3	18.2	57.6	32.9	48.3	73	21.5	103.6	38.3	48.7	109.9	126.7	59.5	64.8	67.4	110.6	78.4	76.7	4.1	87.6	151	42.7	128.5	54.3	69.9	68.7	16.6	92.3	66.2	45.2	63.5
233	844.4	2113.3	532.3	804.6	460.2	692.6	1111.8	1215.2	940.9	523.8	1112.6	1288.3	465.8	506.1	831.2	1070.3	264.4	1005.7	854.1	1280.4	642.7	270.8	628.9	691.6	642.9	451.1	683.3	725.9	627.4	1358.7	684.6	576.8	794.2	870.6	496.4	964.1	934.5	855	1191.1	1207.4	617.9	652	863.4	553.7	251.7	644.3	807	862.9	1214.6
234	130.8	223.7	234.4	150.3	154.2	226.3	178.6	227.4	311	156.5	190.7	125.4	176.8	262.2	189.1	189	168.3	287.9	166.3	225.3	120.6	157.1	125.6	98.7	195.9	199.3	114.7	140.6	248.7	140.3	182.3	194.3	121	187.7	106.6	304.1	177	206.4	310	173.9	348	175.5	173.9	167.8	357.3	412	279	168.2	134.3
235	164.6	349.8	139.1	157.7	685.1	647.6	283.1	393.5	606.1	158.6	181.9	201.7	318.8	344.2	211	258.9	137.2	286.5	266	828.5	262.7	310.2	279.6	249.5	275.9	362.8	246.8	311.5	605.6	196	371.8	226.1	293.3	225.9	119.3	476.5	447.3	330	317.8	283.1	537.2	508	359.6	92.9	394.4	923.9	547.3	449	339.1
236	-290.3	-63.1	14.4	33.2	-149	-64	-229.4	-46.8	-94	-79.9	-58.8	-110.7	-23.7	-71.4	-43	11.4	-2.6	-50.6	-19.5	-10.5	-96.2	-22.6	-103	-44.1	-242.3	-95.3	-90.9	-110.5	-91.4	-114.3	-99.8	-51.7	-104.1	-110	-297.4	-19.4	-67.5	-54.9	-63.9	-95.9	97.4	-109.4	-151.6	-27	-20.6	-29.1	-55.4	-97.2	-18.8
237	596.6	159.7	277.9	178.8	335.8	190.4	351.1	214.4	145.7	396	194.5	328.5	133.8	290.5	114.7	196.3	278.1	170.4	283.6	341.2	197.8	327	225.6	183.4	257.5	173.6	327.3	170.3	371.1	342.5	343.6	332.1	389	312.4	470.3	240.6	246.8	329.9	162.7	262.1	253.6	79.1	345	72.6	159.7	214.2	157.8	255.6	206
238	134.6	251.7	243.5	193.4	196.1	85.4	123.7	119	3	145.5	102.8	85.8	205.1	174	153.5	36.2	145.5	163.6	136.7	119.7	244	188.6	159.6	223	255.4	289.5	147.8	86.3	185.9	55.4	164.5	188.1	146.7	196.9	263.7	100.1	113.1	117.2	226.3	138.1	239.2	196.4	167.8	144.1	198.7	103.3	223	343.7	125.5
239	553	316.7	348.7	322.4	623.5	224.8	530.8	281.4	343.6	466.5	347.7	542.4	390.6	324	198.5	406.7	394.1	303.4	243.2	333.9	361.9	770	216.2	304.3	659.1	541.7	314.8	661.9	374	660.5	478.6	391.9	330.1	353.1	519.4	274.7	267.3	308.6	651.8	408.7	385.3	414.5	311.6	322.9	194.1	507	223.7	228.4	194.5
240	496.9	199.4	242.5	155.1	175.3	430.9	324.2	335	205.2	149.9	328.3	175.7	329.8	253.6	218.7	338.4	240.4	199.9	306.4	401.2	235.3	222.6	130.2	304.5	164.1	266.9	225.7	335.1	287	293	265.5	222.2	221.8	262.1	268	182.5	149.4	253.5	289.5	133.1	345.6	606	326.3	257.8	173.3	291.1	355.5	367.9	218.4
241	873.6	3464.8	2285.6	1214.6	986.2	1865.3	802	1806.7	1704.3	1731.2	1276.2	1915.2	1588.9	1256.8	1253.9	1328.4	1818.5	3141.8	1596.3	1638.7	1290.1	1437.9	1598.8	1043.1	1953.3	1427.4	749	1421.4	1136.8	976.4	1233	1729.4	1149.6	1414.9	1721.1	1345.7	1293.7	2257.1	1215.3	1257.9	2183.2	754.6	1199.9	1091.5	1293.4	2405.2	1795.7	1437.5	1257.9
242	33	53.9	132.8	147	21.8	77.8	-72	57.5	62.6	71	1.7	-5.5	79.7	45.9	110.4	87.7	92.1	92.4	96.2	94.9	10.8	46.2	60.7	1.9	113.3	255.5	24.9	83	60.2	156.4	87.9	2.6	26.2	-53.2	21	33.1	188.3	110.2	121	-8.3	48.3	27.7	25	104.3	198.8	76.5	118.6	-28.7	42.2
243	795.1	1002.6	763.7	1074.6	1177.7	897.5	668.2	1033.9	1420.4	1040.9	1425.4	1114.6	1259.4	1061.1	997.1	1372.2	370	940.2	1241.9	1049.1	1056.3	1199.9	2444.1	1620.3	815.7	1529	825	815.9	655.7	739.4	948.1	891.4	1139.7	787	1032.5	1365.5	913.1	1330.9	1886.4	1151.1	1279.5	1255.5	777.1	1152.5	2163.6	1729.1	884.6	901.8	617.3
244	-4.5	11.5	-10.6	-0.1	24.8	4.1	23.5	1.7	32.2	14.9	28.9	12.1	-8	17	10.6	9.5	15.4	6.9	2.2	1.8	6.2	-3.7	1.3	-0.9	-6	5.9	-6.5	10.5	56.4	-3.4	25.5	-6.7	9.6	-5	20	5.2	-6.6	6.3	44.2	15.7	9.6	31.8	18.9	-2.4	-1.7	2.5	12.6	50.1	9
245	0.4	33.8	-1.2	-2.4	2	6.4	7.9	2.1	52.1	5.9	2.6	12.4	-3.9	10.4	-21.1	12.9	17.7	6.4	4	4.3	24.7	-0.6	-2.8	14.9	-18.3	10.1	-4.7	21.8	-21.9	25	44.8	18.6	3.4	9.2	-51.4	8.7	21.3	19.2	30.8	-3.6	-4.5	16.3	-15.7	13.8	16.8	24.2	8.9	-4.1	6.3
246	32.3	21.3	-33.3	-34.3	-23.2	29.6	-13.6	9.7	-10.3	-112.4	15.3	-126.8	-1.6	-72	-57.7	2.9	-26.4	-1.7	-23.2	-24.4	-21.5	-11.9	19.7	-2.5	125.5	-42.8	-28.6	-5	-187.7	-70.6	-28.6	-36.4	-26.3	-46.8	-122.1	29.2	2.1	-37.4	-40.1	-41.3	-75.1	38.7	3.5	11.5	-9.1	-6.4	-59.9	-19.7	-42.7
247	-43.7	-56.6	-6.9	-27.3	-14.7	37.3	-22	-6.7	-37.3	4.2	-27	-2.9	-7.8	-32.3	-6.7	-26.9	-7.9	2.5	15.1	-49.3	-34.3	-3.2	26.5	12.3	-42.4	0.1	-25.6	19	-45.9	-44.3	2.4	-85.9	-5.5	-60	-67.2	-60.5	19.4	-1.3	-1.5	5.9	53.3	89	-40.6	-6.1	18.3	0.7	-102.5	-40.8	-14
248	83.5	119.1	209.1	39.3	89	18	130.8	155.9	147.8	73.2	130.6	53.7	73.6	37.8	99.2	85.7	40.2	267.9	96.2	31.7	67	169.6	60.9	104.9	55.3	69.9	110.6	69.8	206.5	108.9	60.5	76.4	93.2	100.7	48.6	52.1	211.7	98.5	199.1	101.4	80.9	40	49.8	222.2	73.6	128.7	80.6	63.5	55.3
249	89.9	159	161.7	137.1	120.4	143.3	155.2	137.9	137.3	111	175.6	127.7	125.8	145.8	205.3	119.4	251.5	131.5	232.8	287.6	67	124.3	93.1	168.1	162.3	195	128	173.9	169	70.6	41	178.1	119.7	185.7	162.6	167.7	100.9	188.7	126.9	164.1	196.6	251.7	57.3	161.3	271.8	213	237.1	129.1	103
250	90.1	122.2	68.5	80.1	180.1	73.3	181.3	62.9	118.3	74.2	87.4	121.6	99.6	117.8	82.5	36.3	66.4	79.2	55.4	37.7	91.3	85	117	76.3	205.7	86.9	116.4	110.3	219.5	184.9	150.5	101.4	90.5	166.7	223.6	34.2	147.8	116.4	223.9	125.9	69.6	71	179.5	56.6	128.3	83.3	108.4	107.7	99.9
251	63.8	132.6	-5.9	50	-76.1	-50.3	24.3	45.3	132.4	-50.9	37.9	-50.5	-94.2	6	48.3	37.1	-42.8	-6.8	-8.4	41	-34.5	-89.7	56.9	91.7	-123.3	-127.9	78.2	-86.7	-125.8	-92.2	35.7	-27	100.9	42.4	70.2	-5.2	-164.5	70.5	64.1	2.7	-15.7	-144.3	-98.6	61.8	32.4	-49.2	39.7	3.6	136
252	411.5	618.3	265.5	331.7	180.8	519.5	343.1	385.9	228.2	221.9	151.2	398.8	279.9	264.8	725.4	84.4	103.6	220.8	117.9	150.8	641.5	455.7	1460.1	635.5	530.7	311	262.8	518.6	267.2	309.6	500.2	260.8	432.1	443.3	371.4	821	235.1	226.3	291.2	228.7	296.1	392.4	748.9	157.2	849.9	196.3	716.5	460.4	1088.3
253	250.3	846.2	308.7	508.5	555	308.9	215	436.6	276.2	382.4	437.5	514.3	409	403.3	481	955.2	550.3	438.3	612.3	626.7	333.7	292.4	365.3	471.8	475.8	622.6	251.8	337.6	303.1	266.9	250.1	300.1	228.7	514.1	203.4	523.1	172.1	348.6	575.2	237.6	463.4	318	238.9	500.3	303	678.7	339.1	227.3	350.4
254	33.5	17.5	26.2	0.1	34.5	29.6	41.1	22.7	33.8	10.2	40.4	22.6	14.1	22.2	16.8	7.4	23.3	26.8	26.8	11.4	24.7	25.3	20.2	36.1	66.4	73.3	31.9	22.9	42.8	93.6	2.8	55.5	-6.6	39.3	39.6	22.3	29.6	35.4	26.9	35.6	14.1	-14.5	16.5	1.5	18.9	-34	8.2	48.6	26.5
255	441.1	389.3	433.9	460.1	416.4	265.7	634.5	348.7	217.8	176.9	333.5	267.4	487.4	521.6	471.4	188.5	178.9	296.4	254.1	194	407.3	315.5	403	390.3	338.1	363.9	407.7	447.5	589.2	815.6	405.5	613.2	358.2	591.3	278.3	338.5	320.9	426.3	365.9	345	378.4	401	471.3	442.1	175.6	436.9	293.1	284.8	366
256	-101.2	-44.7	-56.1	-84.6	-129.9	-82	-146	-51.9	-5.3	-59.6	-87	-89.2	-41.9	-65.2	-86.9	-27	-50.6	-73.6	-17.2	8.5	-9.7	-29.4	-89.8	-13.5	-88.4	-57.7	21.9	-4.5	-102.4	-83.7	-56.3	-80.5	-69.8	-26.1	-142.6	-0.4	-23.6	-62	-101.4	-111.2	-32.3	-91.7	-66.6	-63.9	-58.3	-88.5	-67.5	-73.6	-85.7
257	266.7	1250.2	761.3	760.6	415.9	1275.5	891.1	1104.3	294.4	2015.7	1229.7	747.6	465.1	843.6	1706.1	293.3	288.8	2193.4	2081	616.4	431.6	421.1	611.5	333.8	209.9	319.5	545.9	699.8	1256.8	1227	606.6	1519.8	1330.2	732.1	229.7	442	950.2	1095.9	220.9	647.7	371.2	253	1899.6	372.6	255.6	680.2	566.3	1097.5	776.3
258	45.1	2.8	14.9	68.3	58.1	59	57.6	68.8	94	79.7	34.1	30.8	51.4	47	33.6	138	25.8	11.4	85.3	35.3	25.8	34.8	62.4	32.4	116.9	103.5	69.5	45.5	101.9	130.6	33.5	58	92.7	45.6	69.5	33	84.5	20.7	46.4	170.5	3.3	4	214.9	22.1	41.2	-21.8	53.9	116.6	34.1
259	189.5	462.7	432.8	183.4	147.5	217.8	152	138.9	283.6	248.7	210.1	284.5	231.5	343.1	158.4	66.4	183.7	398.5	285.5	174	306.5	219.3	478.2	479.6	355	394.8	268.6	227.1	303.5	132.7	367.4	122.7	325.4	129.9	232.3	188.3	108.4	301.9	444	130.1	254.3	413.9	113.8	240.4	328.1	423.7	261.6	127.7	233.7
260	-59.1	14.5	-6	-11.8	8.3	26.5	-31.3	-12.6	21.8	-23.6	0.6	9.8	-16.3	0.3	26.2	-7.7	-60.9	23.5	-18.7	10.7	-54.1	3.9	-5.4	2.8	9.4	-13.2	10.9	-29.9	13.7	79.8	-11.2	-5.9	-6.6	27.4	20	-5.4	28.3	-6.5	-15.7	24	0.6	-44.3	17.1	46.7	-10.1	13.9	-7.9	-25.6	-13.3
261	1294.4	2446.7	1621.6	1367.8	1070.5	1905.2	2582.4	1163.4	1043	2222.5	2156	993	1410.2	1807.1	1992.1	2705.9	2003.2	1423.4	1068.2	1147.3	1216.1	1315.7	950.4	1151.5	1246.9	2632.1	1083	1456.2	1506.7	2076.9	1489.4	1967.6	1293.2	1652.9	2282.9	1974.3	1437.3	1411.4	1042.1	1450.3	1585	2774.7	1711.4	882.7	1204.4	2024.4	1304.3	1181.1	539.3
262	275.5	152.8	179.5	189.2	163.1	213.6	363.7	135.8	312.1	229.5	158	115.6	207.7	229.9	127.2	125.9	191.4	177.2	104.8	142.3	175.3	132.6	195.1	128.4	374.1	364.1	175.9	166.1	292.6	417.9	185.8	318.6	359.6	412.5	566.7	182.7	232.9	263.4	379	180.9	215.2	180.6	194.7	25.3	178.4	213.3	187.8	-5.1	127.8
263	-44.8	-65.7	-56.4	-31.2	-83.8	-93.8	-134	-38.2	-135.6	-43.5	1.1	7.8	-72.6	-130.9	-106.4	-69.6	-70.4	-43.7	-1.5	9.1	-38.6	-38.3	-56.1	-70.4	-139.3	-251.3	-97.3	-88.3	-112.9	-431.6	-215.6	-144.8	-164.4	-64.8	-277	-58.9	-115.6	-99.2	-323.7	-176.2	-52.5	-171.6	-108.6	-127.1	-54.9	-104.5	-61.7	-22.8	-37.4
264	195	118.3	108.3	125.6	140.4	150.9	169.1	113.7	209.5	62	194.9	47.2	151.7	181.5	90	27.7	101	111.3	93.6	72.1	136	141.7	103	59.4	260	247.4	187.5	97.9	163.5	526.7	48.6	214.5	262.2	191	251.9	93	55.5	136.8	183.9	154.2	3.5	194.7	168.5	254.6	153.7	203.5	93.7	129.7	157.6
265	-92	1500.2	-2.3	332.9	1370.8	1793	380.5	605.9	2023.6	93.3	239.8	-16.1	158.4	648.3	861.8	-32.4	203.5	566.4	-44	28.9	598	201.6	1489.1	363.8	235.7	444.3	134.8	346.4	131.8	-12.4	294.6	675	-53.5	364.6	-59.5	1311.3	-41.7	87.6	196.1	6.2	308.1	310.9	465.9	47.2	11.3	267.1	17.7	370.7	916.7
266	-7.7	-6.4	40.6	89.4	115.8	54.9	37.8	102.6	102.7	12.1	27.3	26	51.8	62.5	89.7	43.2	-9.1	27.4	11.9	139	13.6	38	76.4	-1.9	26.4	44.4	24	26.2	64.7	14.9	46.6	89.1	-1.8	27.7	50.4	97.8	40.4	27.1	72.3	45.5	33.7	23.3	47.6	2.2	8	69.3	124	16.9	79.7
267	2.4	22.9	-3.9	-19.2	-0.8	-37.5	-23.9	-18	-23	2.9	24.5	21.6	-3.6	4.2	14.6	-8.8	7.5	-11.3	-1.2	-0.5	24.4	-7.1	-24.9	11.7	13.7	21.2	0	-29.5	93.8	-2.7	-16.4	-25.1	5.2	5.5	-16.9	-7.9	18	-9.3	-41.7	9.4	-15.8	-56.5	-18.4	13.9	4.6	0.8	-17.6	9.9	8.6
268	-490.2	-179.5	-198.5	-165.6	-285.8	-239	-380.1	-108.2	-263.6	-92.9	-254	-297.8	-203.5	-253.9	-236.8	-74.5	-113.3	-165.4	-153	-130	-278.5	-116.1	-197.5	-214.7	-626	-441.3	-244.3	-237.9	-306.4	-611.1	-282.7	-243.1	-149.7	-408.5	-587.1	-108.6	-311.5	-253.9	-509.2	-267.7	-192.1	-433.9	-318.1	-79.5	-218.7	-212	-161.8	-340.3	-198.1
269	-23.4	11.1	-11.9	-10.1	-7.9	3	-29.8	-4.9	-42	-23.1	-8	-20	-3.6	-10.9	-9.1	-4	-21.8	-13.4	-23.4	-2.9	-27	-4.2	-18	-8.9	15.4	25.7	2.8	-0.1	-52.4	26.7	-2.5	-2.1	-22.6	-3.5	-9.3	-4.6	2.5	-13.1	-11.5	-15.7	-3.1	18.2	-6.4	-14.4	4	-8.8	-24.4	-23.9	-7.4
270	80	170.2	80.5	38.5	58.2	119.1	33.7	200.6	69.9	-33.9	125.5	116.7	49.7	69.2	34	246.1	-41	58.6	93.2	155.1	131.4	65.9	124.3	103.4	-18.2	23.8	75.1	143.9	103.3	176.2	128.2	113	98.7	66.9	-54.5	43.4	27.5	76.2	-9.9	39.1	49.8	60.7	158.7	89	37.6	152.3	82.4	106.7	51.3
271	-253.9	-114.7	-157.9	-158.4	-229.6	-136.2	-124.5	-154.1	-189.3	-159.6	-200.6	-180.5	-155.7	-123.1	-152.6	-115.6	-189	-232.7	-168.5	-82	-185.2	-127.9	-146.8	-135.1	-165.5	-251.3	-129.8	-198.4	-250.1	-219.3	-176.3	-196.6	-51.4	-299.2	-408.5	-227.6	-211.4	-195	-207.4	-83.9	-332.5	-246.9	-162.6	-96.4	-92.7	-183.4	-275.1	-341.4	-192.3
272	-19.5	73.7	14.5	-8.4	-6.1	10.7	26.4	4.7	64.6	56.4	42.6	31.7	6.3	57.6	32.2	34.5	53	-14.7	59	6.1	-7.9	26.5	19.6	16.9	86	54.3	32.6	-4.4	9.4	80.3	81	5.7	-8.2	-15.2	-13.5	25.1	-6.9	20.2	54.2	43.1	60.7	61.6	9.8	55.4	65.1	114.8	77.1	-52.9	13.9
273	40.2	-267	-87.1	58.4	-98.8	-11.9	220	-9.3	67.5	18.3	-50.7	28.3	32.7	-63.6	-135.8	-59.8	-104.1	60.1	-94.8	76.1	-129.1	-39.3	24.8	39.4	62.1	-55.1	-11.4	-87.5	55.7	111.3	-109.4	-6.8	-6.5	-90.3	-155.8	103.2	59.2	-29.6	-270.8	-126.4	33.6	-323.7	-11.3	140.6	-33.4	60	-47.9	132.6	121.2
274	-62.2	69.2	62.8	75.6	98.1	111	-52.1	8	108.9	61.2	83.4	74.2	42.6	11.5	96.8	1.2	74.7	86.4	95.5	6.5	-74.5	58.3	1.5	58.8	201.1	148.9	108.4	83.1	24.4	41.3	-1.5	-32.7	-46	-21.8	-144	-44.4	150.9	8.3	81	53.9	-37.1	102	42	104	64.5	49.5	85.9	60.2	94.7
275	72.3	293.8	209.8	317.9	-157.8	-72.4	-58.1	-28	141.2	-1.2	-4.3	-194.3	138.5	11.6	-15	-13.2	182.5	114.5	-36.7	16.7	7.1	64	145.4	5	320	39.1	44.6	-56.7	-104.2	-147.7	-70.2	116.8	32.8	83.9	-32	173.7	-211.3	115.2	188.1	36.4	96.4	-54.1	-148.7	103.6	21.8	67.9	48.5	-116.8	-83.7
276	341.8	240.9	218.3	236.1	253.9	253	242.3	224.5	241.8	282.7	305.7	333.6	249.3	238.5	374.2	173.5	298.9	221.8	339.8	338	239.5	227.9	257.5	243.5	245	208.9	314.3	256.1	235.5	283.5	244	291.8	380.6	227.9	428.6	225.7	317.4	286.2	374.6	329.6	269.4	253.7	245.7	268.3	265.7	284.6	382.3	296.4	295
277	255.5	267.7	362.3	337.1	165.2	163.2	217.4	239.8	153.8	105.4	110.6	209.3	193.8	123.4	381.4	263.5	91.2	217	262.3	403.3	207.1	224.6	223.8	215.2	175	115.7	208.8	103.5	182.5	189.4	282.1	301.7	210.3	179.8	186.9	316.7	246.5	202.3	359.6	341.4	302.5	131.1	197.9	189.9	320.3	89.5	323	147.8	229.5
278	-122.8	14.2	16.2	54.1	-3.1	57.7	-35.2	7.4	107.4	9.5	-57.7	-6.2	69.2	-20.9	67.9	5.2	22.4	43.4	-1.3	23.7	10.1	-14.5	55	50.5	161.2	122.2	0.1	46.5	132.7	104.4	-23.8	36.9	127.6	25.3	-131	38.5	-75.4	56.1	90.4	-6.5	-43.1	7.4	-53	58.9	37.7	4.1	61.2	-47	51.6
279	-148.9	-34.8	-81.2	-81.6	-70.2	-97.4	-64.9	-10.8	-122.9	-63.8	-71.9	-123.4	-71.7	-63.5	-82.4	-43.4	-78.1	-28.4	-63.5	-46.2	-76	-64.6	-43.2	-29.2	-140.9	-115.4	-75.6	-58.5	-210.9	-254.3	-85.4	-105.4	-104.5	-150.4	-235	-70.8	-96.7	-121.5	-120.8	-145.7	-72.1	-88.2	-95.9	-48.9	-81	-80.7	-40.8	-56.9	-27.6
280	-43.1	-36.3	-31.6	-16	-54.2	-51.6	-49.5	-28.2	8.7	18.8	-6.1	-14.3	-29.9	-32.7	7.2	9.1	15	-29	-12.3	-10.2	-27.1	3.1	-42	-19.9	-88.3	-115.7	-3.9	-42.4	81.1	-75.6	-42.6	-30.2	27.3	-64.8	-43.8	-20.5	-32.8	-72	-171.2	-12.8	-21.3	-15.4	21.8	-1.4	1.6	-55.2	44.9	-46.4	-15.6
281	9.4	-11.4	-11.5	1.3	-10.7	-3.1	1.6	-17.6	-13.2	-12.3	-4	-7	38	30.2	55.6	-3.4	-1.8	-0.2	16.6	-3.7	47.9	5.2	-9	89.5	-96	40.9	35.1	6.6	0.1	35.1	3	3.1	-9.9	39.9	-34.7	-2.9	9.5	-15.2	-15.3	20	-7	41.3	13.3	7.1	-10.9	-15.8	-20.5	-4.8	5.3
282	1255.7	835.7	1227.4	966.6	395.8	589.2	654	741.2	457.8	587.6	1328.6	690.5	878.4	765.3	1040.3	782.3	518.2	1024.7	873.5	734	591.7	439.8	658	600.8	607.6	949.4	797.4	675.2	525	792.7	476.5	687.8	366.5	657.2	746.3	903.9	386.8	690	769.2	450.3	877	482.2	477.2	899.6	1141.7	867.7	1149.4	524.3	502.1
283	1259.5	991.5	1292.7	1565.3	670.6	1064.4	1761	975.4	587.5	1302.4	3863	1382.3	1279.4	1863.8	1361.1	499.1	853.3	1440.2	787.2	574.4	1372.5	1156.8	1203.6	1623.2	1116.4	1595.4	1794.9	1455.6	1107.7	2183.6	1207.5	1759.2	1101.4	1798.4	1190.9	1453	787.4	903.1	2009.2	1162.5	826.7	1887.1	1113	1483.7	1007.8	1416.2	852.1	1015	1292.4
284	53.7	22.7	55.2	39.8	18.1	2.8	-0.5	86.9	34.8	57.4	94.8	5.9	38.1	49.3	97.6	38.8	205.6	48	91.3	60.1	33.5	45.8	47.9	47.8	-8.8	-20.5	44.7	64.1	91.3	-11.6	39.4	40.9	26.7	2.5	-30.9	67.9	-9.3	50.1	59.9	4.9	112.8	-72.5	18.8	12.3	108.6	11.5	72.5	36.3	38
285	-10.6	-3.4	16.9	-0.7	-0.3	9.4	14.9	12.2	49.5	33	6.5	-10.3	30.5	19.2	1.4	16.1	7.5	21	9.2	4.4	39.4	17.4	25.8	17.5	-12.2	35.7	0.9	-6.4	2.1	-38.8	3.8	-1.1	1.9	8.2	29.4	211.7	32.4	243.5	111.8	25.1	19.3	18.4	28	15.9	-1.5	21	1.9	-2.4	13.5
286	22.4	-12.3	3.2	3.3	14.4	23.2	-23.8	4.8	40.8	-8.2	-21.4	-13.2	3.1	1.2	1.7	-4.8	-22.8	18.2	16.4	1	-15.3	-6.9	14.6	16	7.6	20.1	1.7	-2.2	-35.3	-6.8	-4.6	-7.7	5.3	30.6	-28.6	9.5	34.5	43.9	16.3	40.2	15.1	19.3	33.2	2.6	8.4	-7.9	22.5	0.8	15
287	103.6	125	52.9	69.6	85.8	64.8	41.4	102.7	94	49	34.1	26.8	88.2	43.3	82.1	21	67.5	65.5	43.6	45.5	100.3	51.7	36.6	54.4	102.1	27.8	73.2	98.8	135.1	123.5	104.5	15.6	28.7	53.4	69.9	76.7	71.3	30.7	53.2	21.3	43.7	104.3	113.4	72.7	88.8	50.2	37.4	46.7	27.1
288	96.3	171.8	112.5	82.5	115.1	98.1	159.2	82	147.5	52.7	74.5	51.4	135.7	154.8	135.8	66.1	116.4	78	104.3	54.3	118.1	128.1	127.9	123.3	207.6	207.5	117.7	112.3	149.2	85.6	149.1	182.2	114.1	146.7	171.9	168.9	78.3	119.7	120.9	90.7	197.9	112.7	120.3	79.7	153.2	140.1	125.8	72.4	64.4
289	562.9	373.5	348.9	517.4	269.7	220.4	265.6	176.2	377.4	158.3	262.7	179.2	347.1	335.7	297.8	253.2	590.5	361.7	217.5	308.4	314.1	458.4	367.1	234	458.4	388.3	272.5	372.8	238.4	397.9	281.9	258.4	271.2	343.1	471.2	307.7	290.7	188.1	291.7	250.9	389.8	267.5	244.4	286.7	260.1	246.9	512.9	160.8	186.6
290	-94.2	-61.3	-53.4	-42	-108.3	-52.4	-37.8	-30.2	40.1	9.4	-57.1	-42.7	-77.8	-53.9	-37.3	-18.8	-68.8	-28.4	-6.1	-12.2	-48.7	-54.2	-24.1	-46.4	-73.9	-121.6	-28.6	-55.8	-64.5	-73.4	-90.4	-86.7	-10.1	-93.1	-76.6	-99.1	-28.4	-65.7	-98.5	-45	-137.7	-7.4	-45.7	-21.5	-47.4	-73.8	-64.9	-81.9	-16.9
291	2621.1	3225.9	1889.3	2794	4025.6	4350	2935.4	2952.7	10271	2532.8	3278.6	2771.4	3881.3	3367.6	5121.1	4803.8	6177.6	1195.1	1834.6	3068.2	3982.7	5273.8	2538.2	2706.8	15123	4078.2	2422.5	3390.6	2372	4431.6	4703.3	2796.7	2138	2763	6920.1	2454.5	1615.1	4491.9	3807.5	3108.9	5010.4	2365.3	2817.5	1495.2	6744.6	2305.8	3872.8	2673.1	1441.3
292	575.6	904.4	442.3	866	449.1	486.3	500.6	265.1	669.6	509.7	284.6	326	434.8	553.8	503.5	657.1	1183	290	395.4	510.9	493.3	354.6	423.4	279.9	624.3	794.7	336.8	464	481.5	535.8	446.7	585.4	468.6	1003.7	406	381.5	385.4	408.6	556.6	363.2	476.3	595.6	299.3	292.1	740.3	441.3	434.3	388.4	235.8
293	604.5	313.1	365.1	351.2	401.4	315.6	677.9	334.9	502.4	445.9	494.6	588.3	458.1	454.6	451	261.6	453	333.8	362.6	373.1	547.5	571.9	322.4	360.1	323.4	505.6	553.2	376.7	670.5	547.5	621.1	614.1	567.5	511.3	735.4	334.4	314.1	358.3	474.3	530.4	396.1	446.6	492.3	451.1	493	418.8	358.6	490.9	382.9
294	-22.6	-19	47.3	22.8	71.4	-0.7	82.1	20.8	-45.4	27.4	-30.1	-8	24.8	58.7	-15.4	11	-35.1	0.2	-8.7	16	52.8	-16.4	14.5	-4.5	15.5	-84.4	30.5	59.4	179.7	-9.4	4.5	13.7	10.9	4.8	61.5	-32.2	-0.1	-32.2	-20.3	0.6	-5.6	11.3	-42.8	-3.4	20.1	29.7	15.1	-1.9	18.9
295	290.2	348.5	255.4	136.2	200.4	149.6	71.2	205.9	423.6	195.4	152.3	348.1	261.2	300.5	242	200.5	95.7	305.4	313.8	212.8	219.8	211.1	354.7	268.4	30.8	481.9	102.6	517.9	331	594.7	146.4	173.9	114.8	227.7	281.6	76.6	328	83.1	146.1	275.4	128.1	619.6	42.5	193.9	376.6	277.4	357	359	401
296	26.6	49.6	51.1	56.7	5.9	186.5	-11.2	112	17.4	40.6	40.2	181.7	70	60.7	14.3	6.8	23.6	75.7	-11.6	42.6	16.6	27.4	66.8	82.7	-39.9	143.7	89.5	101.3	101.1	58.1	74.7	14.3	20.4	-8.5	-30.1	58.3	132.7	153.9	149.6	125.1	144.6	78.5	64	117.8	86	141.6	107.6	51.2	78.9
297	120.4	47.5	65.8	112.1	107.9	124.4	106.4	63.4	150.4	82.7	110.8	158.5	103.2	122.1	123.6	124.5	119.3	51.9	64.8	162.9	86.3	94.2	91.2	91.5	338.2	142.5	60.7	140	169.3	91.7	123	96.2	13.4	71.6	74.7	94	13.8	159.6	79	121.5	99.1	93.8	-2.6	74.9	55.3	115.8	92.2	150.9	88.1
298	118.3	54.1	62.9	62.9	111.2	61.1	55.6	62.6	154.1	68.3	136.9	91.1	79.1	83.6	86.2	45.6	79.4	42.3	82.4	49.2	60.8	82.4	61.1	105.1	141.1	104.4	120.9	106.8	111.1	91	69.6	68.7	53.4	89.3	160	178.2	106.9	44.8	201	101.1	56.5	95.3	90.1	107.6	122	156.1	102.1	98.2	56
299	865.2	460.9	672.4	514.7	436	415.1	525.6	775	493.3	880.6	769.6	695.9	608.3	687.1	545.3	755.3	430.6	412.6	736.7	569.6	669.6	891.4	565.3	828	329.1	542.4	469.3	539.8	563.6	817.3	552.5	377.1	829.4	350	829.1	657.5	595.1	678.4	1696.6	475.7	678.9	640.7	436.8	659.5	457.4	604.4	858.8	527.6	1107.2
300	75.1	103.6	97.5	100	80.4	70.5	56.3	58.7	129.4	92.9	110.6	132	90.3	65	99.3	58.9	132.4	69.1	131.2	42.9	121.3	109.3	73.4	76.5	212.9	122	117.8	125.1	135.4	200.1	100.8	115.6	77.2	133.7	204.3	85.6	76.7	106.7	146.5	99.8	164.7	158.6	150.5	125.1	117.4	75.5	166.1	130.8	54.1
301	232.3	79.7	35.8	20.7	105.6	30.2	85.8	62.3	-29.3	50	29.6	64.9	71.9	45.5	76.5	34.8	20.3	30	9.2	38.7	62.7	43.6	63.7	73.4	-3.8	25.4	66.3	89.6	50.6	108	52.3	-2.5	109.7	125.8	207.7	20.8	54.3	56.7	132.4	38.2	79.5	25.2	133.8	89.9	1.5	144.3	88.6	43.9	33.8
302	-152.4	25	-36	-53.5	-71	-46.3	-93.4	-13.4	-80.2	-25.7	-62.5	-21.3	5	-57.7	-9.5	-39.7	-48.6	-22	20.6	-21.5	-18.4	-36.5	-66.8	-17.5	-44.4	-81.8	-11.8	13.1	2.6	-165.3	3.5	6.6	-48.3	-24.8	-232.9	-49.4	-78.2	-82.3	-76.2	-86	-13.5	-88.3	-6.4	27	-52.7	-105.6	-60	-55.5	-52.7
303	20.7	33.9	30.1	36.5	37.5	12.6	44.3	27.8	46.9	3.9	4.4	14.5	72.6	16.2	18.3	38	27.7	-11.7	31.8	1	57.8	39.9	30.2	54.8	69.3	27.6	37.4	32.5	-61.8	17.5	66	53.4	-2.8	51.7	-15.3	3.4	7.5	22.2	47.5	12.4	53.6	-23.6	69.6	138.1	71.2	-3.7	38.2	32.3	29
304	54.3	19	21.5	90.8	66.3	71.6	-5.6	-10.6	88.7	45.9	14.6	-22.3	83.2	21.8	5.2	-17	16	42.5	44.6	7	57.3	73.2	79.8	55.1	13.6	69.9	92.9	62.7	54.3	12.4	0.4	99.5	94.2	118.1	64.8	20.3	36.4	43	65.6	-19.6	-2.4	157.5	53.9	35.8	96.2	-1.9	42.5	34	44.8
305	16.4	45.5	129	115.3	8.8	83.7	59.7	82	190.1	32.1	27.3	33.5	85.1	119.8	151.6	114.2	70	140.6	136.4	59.3	83.1	68.2	31	76	-8.1	102.2	30.5	49.4	123.9	131.3	62.7	144.5	76.3	55	161.2	149.7	106.4	104.8	132.9	110.1	190.9	73.1	39.3	135.8	104.9	149.9	198.4	46.1	91.2
306	-31.3	197.2	39.6	4.8	6.1	-36.9	-3.9	5.7	-11.4	-10.3	-43.4	-36.2	17.1	-2.4	27.5	5.2	15.3	22.4	-6.1	10.8	29.4	13.4	36.2	20.4	-12	139.1	-0.3	-15.1	30	-47.5	21.4	34.1	-31.8	2	30.5	17.9	-14.4	17.9	0.3	17	-1	-26.9	-30.4	21	-7.7	-16.3	-9.7	-15.1	-0.1
307	104.2	84.5	103.4	123.5	166.2	139.6	129	110.4	128.2	29.7	95.1	45.3	91.4	100.1	158.6	141.9	29.5	128.5	141.1	192.4	86.1	90.1	171.5	61.2	-8.3	115.4	77.8	126.8	90	96.4	140	121.6	82.6	101.3	101	270.7	69	200.9	241.9	146.6	200.9	145.1	124	131	178.2	196.9	90.9	29.3	63.7
308	1102.6	1196.3	1036.3	799.8	589.4	993.5	829.8	882.8	1048.9	672.5	1078.9	633.6	766.5	748.7	748.9	664.8	644.8	791.8	782.4	680.1	833.7	655.5	961	860.6	1024.4	1064.8	637.2	757.5	661.6	835.6	857	868.9	942.6	816.5	956.4	742.2	966.1	875.3	953.2	946.5	2754.4	981.7	686.9	908.2	751.9	828.9	1095.2	620.5	1037.3
309	45.2	69.5	79.8	65.2	57	52	43	23.7	1.1	23.9	36.6	40.5	57.9	45.5	95.7	69.6	27.1	66.3	70.4	52	46.1	59.5	36.7	55.2	43.7	69.6	41.8	44.8	33.9	93.9	42.2	37.9	16.1	65.3	34.3	64.5	108.4	83.3	61.9	52.6	87.5	69.6	63.9	82	102.1	66.1	104.6	38.8	36.8
310	302.3	879.3	552.3	95.6	8.3	48.3	255.5	102.9	77.5	19.2	-5.7	72.6	190.4	177.5	155.9	231.6	45	903.1	198.7	20.1	673.7	18.1	361.2	323.2	2004.1	165.6	227.8	124.1	378	40.8	407.9	149.3	237.7	141.4	82.1	163.3	124.7	276.2	319.4	121.5	275.5	152	122.7	538.6	75	982.8	-37.3	99.5	81.2
311	-50.5	-120.7	-37.9	-67.4	-57.9	-101.6	-60.6	-43.3	-77.5	-25.3	-25.3	-46.4	-37.7	-39.1	-42.2	-30.6	-51	-48.9	-36.6	-28.4	-9.4	-70.7	-75.9	-51.8	-89.4	-143.1	-25.9	-54.7	-41.6	-163.5	-40.5	-29.6	-21.9	-75.9	-143.2	-13.6	-133	-75.1	-44.3	-70.1	-20.4	-139.4	-68.5	-48.3	-55.8	-60.3	-31.3	-17.2	-51.7
312	787.4	1064.5	603	958	293	431.8	575.1	836.5	4.2	542.5	693.7	466	311.8	519.2	353.8	1214.8	190.7	575.3	697.5	511.6	548.7	508.6	533.7	633.6	543	367.4	554.3	477	641.3	546.8	782.9	780.3	1039.9	482.3	294.4	217	625.5	460.2	275.6	417.6	234.4	626.4	608.3	515.1	241.9	506.1	315.7	640	564.5
313	147.7	-25.3	8.9	0	61.6	6.8	49.3	59.2	32.6	51.1	52.6	183.6	28.3	1.2	53.7	64.8	0.5	37.2	348	102.7	58	56.9	34.8	43.3	-43.9	-26	113.3	29.6	43.3	89	94.1	18.7	234.9	35.2	71.5	61.4	27.9	10.5	-7.3	81.8	125.2	-22.5	54.6	48.1	51.4	17.6	89.2	61	150.4
314	40.9	47.2	52.5	36.4	48.9	76.4	38	27.8	53.6	23.6	44.3	11.8	58.3	65.4	50.6	28.1	67	42.2	24.4	59.7	8.9	33.4	27.8	37.6	-30.3	67.7	28.2	35.8	97.2	81.3	68.1	73.4	31.3	103.2	51.7	68.8	35.1	30.6	89	39.3	133.1	49	53.9	35.1	61.1	71.8	37	17.8	9.7
315	158.4	330.7	310.3	156	184.2	186.7	170.2	127.8	199	167.6	119.4	140.6	275.3	175.7	190	101.5	251.1	168	220.7	94.8	130.7	173.8	133.7	212.2	335.4	250.7	215.6	179.7	313.1	308.2	206.9	189.5	187	193.3	201.6	217.9	202.9	230.1	437.3	227	441.2	158.9	180.9	171.8	411.1	167.4	219.8	96.3	188.1
316	10.9	-16.4	32.3	18.6	46.3	26.4	28.6	15.5	19.3	51.2	59.8	28.8	38.4	-7.9	6.8	5.7	40	7.5	150.5	1.9	48.2	9.6	11.5	20.7	25.7	26	13	-14.9	40	-4.3	-6.3	15.8	23.2	48.4	10.7	16.3	-10.8	9.3	1	12.9	23.8	46.6	23.7	17.9	-16.9	103.4	24.6	33.2	7.7
317	50.6	10.1	19.2	11.2	19.9	12.9	35.7	8.2	63.4	23.1	26.4	41.9	40.4	12.2	-2.7	21.3	21.4	25.1	20.7	29	17.8	-3.7	13.4	24.9	84.4	54.6	2.1	50.7	-14.9	125.1	59.2	14.6	63.8	88.1	11.7	28.4	52.5	39.6	20.6	47.3	26.8	34.1	51.3	20.7	38.8	34.9	14.4	30.7	20.4
318	17.7	7.3	-11.4	-9.4	18.7	7	26.8	4.8	29.3	-3.4	-11.4	-7.4	-2	2.8	-1.5	11.6	-1.2	2	12.3	1.3	-17.4	4.7	10.1	-1.5	37.1	16.6	-4.5	20.2	21.4	-20.8	4.5	21.1	-10.8	15.7	10.7	-11.4	45.1	8	-0.4	-0.6	4.8	53.6	3.6	5	-7.6	24.3	2.7	-3.3	4.4
319	-27.2	4	-9.9	-18	16.3	8.8	-18.1	-6	-59.6	-19.3	-40.8	-37.8	-26	-15.6	19.5	-21.6	-51.1	-28	-23.7	-11.2	-31	-21.3	-3.6	-17.2	-9.9	-22.7	-13.9	-18.5	-12.7	1.2	-20.7	-11.3	90.4	-32.1	-0.3	-14.5	38.2	-1.4	-15.8	-17.6	-12.4	-22.6	-15.2	-3.6	-7	-1.2	-22.8	-32.9	-17.2
320	30.6	0.3	14.7	-9.4	-0.1	4.9	10.9	1.3	-9.3	-8.2	31.6	28.6	18.3	-7	2.2	-0.3	18.3	11.8	1.3	4.2	22.2	-0.3	6.9	12.7	5.3	23.1	9.9	-40.1	66.6	29.8	20.3	-3	30	-17.3	0.7	3.5	19.5	10.4	7.1	-12.1	-8.3	-7.6	-17.7	9.3	3.8	-7	14.1	7	12.9
321	-72.1	-115.8	39.5	-21.4	-20	40.7	143.1	21.5	76.2	111.4	98.4	143	53.8	36.8	23.6	-71	83.4	74.8	69.2	51.1	-44.9	-13.8	28.1	-30.5	-8.2	-40.5	102.6	5.4	98.9	-10.8	-20.3	113.7	30.7	167	112	0.7	77.7	45.3	104.5	59.8	-27	58.4	71.6	104.3	65.2	71.4	-77.4	28.8	100.8
322	794.8	953	915.2	1050.8	552.5	858.5	538.9	526.1	434.4	466.8	778.2	588.5	692.5	742.9	453.5	724.5	877.2	664.4	543.9	572.8	640.9	610.9	637.6	562.7	678.4	1021.1	737.2	839.2	650.8	1303.9	631.4	539.8	542.9	698.7	622.2	471.6	500.4	527.3	596.2	525.9	659.4	968.9	490.4	530.3	499.6	489.1	957.1	566.5	630.5
323	1045.3	1063.6	1504.7	1048.3	782.8	770.2	708.2	381	698.9	592	1168.6	869.4	785	1099.5	658.1	864.7	1352.9	767.1	727.4	369.4	885.9	918.1	1323.9	670.2	1058.3	1193.5	875.3	889	938.5	1205.2	832.4	1226.5	855.9	814.4	1237	650.4	737.7	558.8	545.7	477.3	1056.2	1383.2	792.3	705.2	478.7	1270.8	798.6	590.3	662.9
324	674.3	1285.1	712.8	1258.4	541.4	699.3	729.1	438.5	518.5	1568	1952.6	1797.8	472.3	714.6	606.6	1342.8	2298.3	724.1	699.1	812.7	545.8	499.4	611.5	574.8	633.5	1138.3	392.2	666	516.1	589.4	755.1	975	694.9	537	1422.4	594.1	678.4	419.4	679.7	637.7	603.1	827.5	379.8	421.1	1029.4	1086.7	586	1126.3	556.3
325	188.7	75.9	73.3	85.6	68.2	67.1	108.4	31.5	146.7	50.3	86.9	121.7	64.7	93.4	108.1	59.4	55	29.3	44.1	47.7	95.9	96.3	124.3	62.3	147.5	134.2	99.1	78.5	132.7	81.2	48.2	47.9	76.2	114.7	160	114.3	68	68	132.1	89	40.6	118.5	104.1	91	115.8	94.4	54.4	40.9	43.4
326	133.6	92.7	84.6	123.1	98.2	82.2	98.5	3.1	106.1	55.9	52.1	69.9	101.6	101.9	110.1	99.9	88.6	70.3	108.4	52.4	98.4	102	72.4	87.3	85	180.8	108.5	100.8	153.1	138.9	90.8	103.7	86.2	96	161.8	83.3	94.1	55.4	130.5	62.2	87.4	80.4	107.7	76.3	97.4	59.9	106.5	68.6	92.8
327	359.8	283.2	169.4	262.1	279.8	224.9	289.3	177.5	204.3	297.3	194.8	207.9	282	321.7	377.7	159.1	273.1	136.1	257.1	129.4	446.1	263.7	204.7	306.8	291.7	346.7	230.3	416.4	369.2	298.1	237.9	265.8	287.3	364.3	445.9	215.7	206	172.2	301.3	296.4	186.7	372.4	125.1	261.9	288.4	235.6	178.1	254.7	279.2
328	507.8	365.9	142.1	194	439.9	434.2	759.7	775.8	-0.4	219.6	77.6	449	573	670.5	456	682.2	166.1	806.4	951.5	342.2	446.5	213.8	489.2	735.5	71.9	987.3	799.6	853	1227	461.5	800.2	538.3	852.1	514.4	182.3	582.9	1019.5	318.7	153.7	579.3	238.6	1239.2	992.1	388.4	576	259.6	540.6	354.2	1441.1
329	58	81.6	105.6	253.7	49.4	50.1	39	107	50	15.5	77.1	37.6	94.3	226.2	88.6	224.1	23.1	120.8	40.3	92.6	99.7	53.4	58.2	74.6	106.2	123.6	30.1	138.2	85	217	32	101.6	44.6	80.4	76.2	102.7	2.6	60.9	86.5	86.9	125.2	128.8	36.9	187.9	30.2	312	100.4	31	39.7
330	-1.4	62.2	245.4	120.8	33.4	66.8	69.5	156.9	80.7	151.1	105.7	67.2	150.1	99.1	63.6	268.8	79	228.6	105.8	101.4	124	105.8	237.4	101.3	190.3	63.5	62.3	131.5	62	68.4	-1.5	88.1	91.6	79	-62.8	138.6	33.3	101.3	50.1	90.6	142.9	44.4	38.1	118.3	128.2	207.2	216.5	57.3	84.7
331	438.5	449.5	422.1	404.5	459.5	659.9	469.8	502.8	704.3	358	510.9	563.4	376.9	455.9	466.8	499.4	299.4	606.8	496.6	703.8	333.3	373.2	536.1	363	680.6	545.6	382.1	649.8	675.1	694.9	371.7	382.8	519.4	376.9	380.6	363.9	623	586.1	518.3	669.3	298.3	919.5	440.2	407.7	626.9	780.8	614.8	489.8	743
332	-9.2	209	465.7	447.6	261.9	135.2	66.3	291.2	272.6	86.6	90.5	68.5	283	204.5	365.6	310.2	102.2	443.9	244.5	670	170.5	147	293.8	145.5	284.8	310.5	9.8	280.4	24.6	21.7	-0.2	181.3	96.2	143	70	456.4	143.9	438.8	268.9	233.8	330.4	96.3	121.6	117.6	465.4	258.5	501.5	28	184.9
333	99	273.4	272.1	151.9	82.9	102.5	78.2	151	168.2	162.8	219.1	140.5	167	149.4	153.7	71.6	226.2	125.8	217.7	195.8	162.8	236.1	134.7	203	127.9	167.3	162.1	183.5	183.5	197.8	151.7	161.9	127	162.2	158	245.5	155	244.5	293.9	172	309.7	160.8	118.6	226.8	278.3	280.4	423.7	115.5	163.4
334	140.1	127.7	51.1	60.7	14	77.5	129.1	57.1	66.4	50.4	67.7	64.5	86.3	86.1	59.7	29.1	36.3	37.4	45.7	15.7	98.5	87.8	88.7	66.8	82.6	61.8	64.6	34.2	86.2	86.5	81.9	74	107	66.2	39.8	11.9	9.3	86	47.3	72.9	81.6	99.8	68.4	57.2	94.4	39.6	60.7	50.5	44.2
335	39.4	64.2	50.2	58.2	70.6	45.8	79.1	50.1	87.7	10.9	24.3	13	31.2	65.6	47	56.3	33.6	-17.1	24.7	95.9	76.3	45.3	-3.7	53.5	68	121	67.1	42.9	172.8	65.5	84.7	79.3	83.2	37	90.5	69.8	59.6	28.8	45.6	38.7	26.3	18.5	157.7	46.6	64.2	78.9	44.5	19.6	50.9
336	183.4	83.8	101.3	91.6	53	55.6	87.5	86.6	77.8	33.2	65.5	72.2	88.6	70.4	60.6	47.7	49.4	104.6	100.7	64	87.3	74.2	81.1	71.5	44.8	72.6	79.1	75.9	64.7	150.7	59.6	126.9	64.3	100.1	97.7	116.5	41.3	109	131.1	136.7	130.5	77.2	90.9	130.1	122.4	125.5	137.8	47	95
337	-4.2	71.3	169.1	-35.7	-116.5	133.9	-116.9	49.3	280.6	95.9	261.5	-57.7	1.8	-18.6	119.2	-23.1	304.8	34.6	206.3	138.7	-1.3	-23	25.2	92.3	232	627.3	-5.6	-47.8	-86.4	-167.5	-74.2	52.9	-23.7	-127.3	-193.6	268.3	-57.5	149.1	-40	91.3	202.9	-84	-118.7	35.1	460.5	98.3	100.4	-10.5	-32.3
338	94.4	86.9	87.8	70.7	89.9	97	84	86.5	99	113.7	116	93.9	128.9	96.3	93.5	78.6	92	111.8	216.6	45	182.2	97.9	424.4	266.9	136.2	221.4	199.6	101.2	489.1	127.2	194.7	108.4	351.1	150.2	174.6	77.8	249.3	110.8	122.5	78.4	145.7	65.1	343.8	178.2	97.5	111.9	152	125.3	302.5
339	951.2	942.6	683.6	504.3	446.6	657.8	972.9	227.5	404.7	450.3	710.7	760.5	319.2	538.7	501.6	329.3	877.6	616.3	520.2	389.9	592.7	353	477	467	657.2	666.3	423.6	584.6	907.8	749.4	672.5	733.7	633.4	805.6	883.3	336.3	428.6	350	470.2	485.5	470	506.6	794	351.3	367.6	423.3	264.1	649.5	354.8
340	229.8	123.7	178.1	65.6	64.3	86.8	124.7	130.3	148.4	82.9	85.1	226.4	129.9	151.5	69.3	122.2	189.9	110.4	119.8	51.2	101.6	65.5	118.1	86	-4.2	154.2	110.3	205	275.4	82.9	141.2	193.4	177.6	152.8	177.4	89	122.4	157.9	133.1	400	105.4	218.9	152.1	113.1	351.6	114.2	274.2	109.8	87.4
341	18.5	116.4	84	47.7	67.9	33.1	73.3	47.5	50.7	14.4	91.6	87.1	122.6	54.9	103.5	63.9	99	17.4	36.4	66.2	36.6	59.2	80.9	73.3	97.1	108.3	47.9	59.6	79.1	114.3	61.5	81.3	53.9	48.4	87	64.5	57.1	85.8	36.1	40.7	108.6	79.2	79.4	29.2	48.4	65.1	104.1	32.2	12.3
342	11.8	-17.1	11.5	-4.1	-112.2	14.5	5.6	45.4	-49.5	14.2	-33.4	19.7	121.4	36.8	-20	-14.3	17.3	-24.7	-58.6	-13.8	29	52.7	37.6	85.3	-103.1	-35.2	48.4	94.1	102.8	7.9	37.1	33.4	8.5	99.1	-151.6	-1.2	19.8	-29	42.2	-70.4	9.9	56.7	77.9	40.8	29.5	-14.7	-39.2	80.2	26.1
343	193.6	534.7	754.7	911.5	411.4	451.5	19.2	203.4	654.3	255.2	506.4	205.3	374.6	826.6	270.8	463	879.1	544.3	488	222.3	249.8	383.9	313	317.9	444.3	1368.7	373	425.3	239.4	574.4	369.5	436.2	266.1	417.1	315.1	314.1	424.6	507.5	341.8	57	638.4	525	192.7	339.2	555.6	839.8	574	182	267.4
344	204.3	97.7	78.1	107.2	45.4	41.1	-26.9	13.1	109.8	38.6	11.4	-31	158	85.6	45.2	25.1	-3.6	89.1	51.8	97.1	60.4	188.3	60.2	67	163.4	213.7	146.3	58.4	57.7	132.8	111.1	48.5	71.4	30.9	-20.8	224.5	-17.7	107.3	287.4	41.4	155	52.6	38.7	126.7	95.7	29.4	161.2	-33.8	84.5
345	22	11.3	-4.6	2	13.4	11.6	58.6	3	-18.8	1.6	2.9	-34.2	-5.8	10.4	1.8	9.5	-7.1	9.8	-5.4	1	-31.4	7.4	16.6	-3	107.8	5.1	2.3	-24.2	38.7	14.8	41.9	-19.5	4	6.5	-17.5	4.4	18.7	1.9	8.5	30.1	7.1	-17	4.6	17.7	4.3	-14.2	-2	-14.9	-2.9
346	1.7	49.6	-21.6	-10.4	-22	-7.3	-29.5	-3.8	26.2	-0.1	9.9	-7.3	2.2	-15.9	-6.2	-3.2	6.5	-2.3	5.8	-10.2	-51.3	-21.6	2.6	2.3	-80.4	-19	-21.8	-20.1	-30.5	36.2	-16.4	12.6	-21	8.2	-12.9	-2.3	22	2.1	-38.1	19.3	-7.9	-23.3	-5.6	2.2	-40.6	24.7	-9.6	12.7	-10.2
347	472.2	246.9	188.3	191.1	267.9	250.7	367.4	164.3	267.7	195.1	322.3	275	181.2	230.2	229.4	71.3	464.6	226.6	161.7	143.9	233.3	229.4	266	178.8	390.4	292.5	263.7	230	419.7	421.9	268.5	253.9	274.2	290	507.8	165.5	189.5	212.6	247.3	268.2	179.5	346.7	234.6	183.7	285.7	216	189.4	303.8	189.1
348	77	121.2	42.4	51.8	63.1	67.1	33	84.4	101.9	30.4	35	14.8	72.7	72.9	81.9	80.3	29.3	72.1	69.9	81.3	87.7	83.5	57.8	61.8	27.6	57.4	86.6	12.6	85.5	99.6	59.7	19.3	53.1	69.5	48.2	112.7	32.6	63.6	59.8	66.1	71.1	39.9	56.6	61.8	86.7	85.9	39.9	27.2	60.6
349	-37	36	43.2	-0.8	-44.2	29	-20.5	-1	-24.5	33	-13.2	-53.7	26.6	38.1	5.2	57.9	57.7	10.9	3.3	95.8	18.7	35.3	-45.8	38.8	-66	31.9	-7.7	17.8	18.1	-141.4	16.2	-8.2	18.4	11.5	54.5	18.5	-39.2	-4.7	-21.9	16	60.8	31.2	-36.3	-15.5	20.2	62.5	21.8	-35.3	-39.3
350	449.3	718.3	448	471.5	257.9	713.4	443.6	485.4	372.8	603.2	917.6	428.7	513.9	753.3	364	468.2	458.4	531.1	753.1	419	385.2	696.8	234.3	487.1	259.5	862.3	549	638.6	480.4	798.3	386.2	564.4	298.6	402.4	344.9	287.9	321.1	697.7	1151.3	500.8	300.1	1311.9	307.7	734.5	373.9	826.5	409.2	441.7	393.2
351	157.2	83.2	89	85.2	79	66.7	179.3	41.5	83.4	47.7	42.9	91.6	76.3	131.7	106.7	27.6	42.1	66.6	60.4	50.7	95.2	41.9	100.7	56.1	-7	112.3	66.4	71.4	113.8	66.7	94.8	109.7	70.6	92.7	190.6	36.5	56.7	78.8	31.2	38.7	57	83	65.7	35.1	72.5	71.8	29.2	119.9	60.1
352	-12.8	-49.7	39.5	116.5	57.2	28.2	74.3	188.8	98.5	40.6	16.1	23.2	74.6	58	95.6	18.3	6.8	60.6	19.2	99.9	18.1	42.3	59.4	5.8	-45.7	58.4	8.3	75	-23	52.9	64.5	47.5	10.3	16	9.1	72	117.1	70.8	-22.7	16.7	76	120.6	25.7	9.3	40.2	51.9	4.3	35.8	62.5
353	1019.7	631.4	919.7	1145.8	1184.1	850.6	599.2	497.3	2391.2	1335.8	1146.5	729.4	1395.1	997.6	1022.9	1119.6	831.9	566.6	1140.3	1441.8	953.2	1015.8	637.7	685.6	819.5	2512.3	731.8	989.4	1011	980.2	1757.7	640.9	949.3	817.5	1656.7	1633	1207.1	1949.9	1669.6	1618.2	1812.5	611.4	1047.9	655	2328.8	975.5	2015.2	687.7	497.7
354	23.9	71.8	108.7	59.4	65.7	90.7	59.6	83.3	182.7	60.9	96	112.6	126.2	144.7	68.7	43.8	100.8	79.9	59.2	21.8	68.1	14.9	127.6	43.1	85	166.4	103.7	157.9	1.2	94.9	54.2	131	83.7	53.7	113.6	57.7	148.8	101.1	183.2	111.9	101.3	125.8	170	84.1	105.7	112.4	100.1	134.7	53.4
355	554.8	339.1	433.8	390	242.3	346.6	69.8	408.7	34.3	398.1	590	636.4	214.9	301.5	187	568.3	149.2	357.1	253.1	160	427.7	270.4	208.6	467	253.7	-12.5	723.2	395	613.5	506.1	519.8	337.4	207.7	72.4	-107.1	154.1	120.5	277.4	144.3	156.2	264.1	134.2	232.1	553.7	-23.2	341.3	234.3	360.7	397.7
356	323.1	175.3	136	238.3	211.3	315.7	130.1	96.9	83.3	106.6	153.3	130.8	187.7	146.6	190.5	194.8	179.3	119.4	217.1	166.9	224.2	124.1	231	182.3	76	116.6	253.6	198.4	270.2	243.1	196.2	164.3	129.9	155.8	389.5	167.5	141.8	146.6	134.4	132.5	137.8	108.2	272.8	138.7	223.6	69.1	408.4	140.3	162.6
357	176.3	81.7	112.5	62.9	149.9	200	75.6	102	305.4	115	42	146.3	149.9	110.2	17.4	-2.3	56.1	90.6	79	33.5	146	141.4	190.5	75.4	171.5	338.5	174.1	173	158.5	244.8	82.4	108.1	32.1	282.1	167.4	120.7	-13.5	49.7	212	170	-52.8	325.3	244.3	111.4	155.3	90.9	64.6	57.8	112.5
358	247.5	184	81.7	170.2	331.1	99.5	212.3	403	68.4	162.2	146.9	148	99	67.3	290.7	211	45.9	214.7	294.7	354.2	228.5	252.2	383.5	210.2	132.2	74.6	171.6	208.4	132.3	187.7	172.9	249.2	416.2	94.2	83.4	156.3	401	97.1	134	402.3	60.7	181.1	272.9	117.4	141.1	153.5	727.9	167.5	360.9
359	85	-36	234.9	124.2	75.5	18.7	56.2	43.4	93.7	78.2	56.2	56.6	118.6	78.2	86.9	23.8	137	35.7	73.4	75.8	81.7	41.7	6.6	66.6	-24.7	59.1	84.8	73.8	47.7	5.9	101.7	118.3	45.4	151.7	290.6	85.5	160.5	119.8	55.9	89.4	128.7	22.5	189.6	72.4	53	127.4	58.8	67.3	39
360	43.8	68.8	44	47.6	95.5	94.6	43.9	22.2	38.2	51	45.1	25.2	57.5	42.4	44.5	60.6	34.7	33.1	45.4	111.8	41.7	31.2	20.5	72.3	92.4	113.4	18.1	7.9	-17.6	130.2	35.9	28.4	71.9	34	67.3	73.6	43	102.7	93	63	43.7	28.8	71	29.5	74.3	61.6	23	58.3	65.8
361	460.6	71.8	189.6	153.8	-115.9	109.1	-41	58.1	-107.3	192.7	75.1	96.4	282.8	50.8	125.5	258.3	127.1	11.8	175.4	52.8	235.5	185.6	189.2	141.6	28	-54.7	144.8	226.7	133.5	-309.2	216.8	254.3	322.5	-1.2	-370.2	91.8	-61.8	-7.7	-121.9	6	7.8	67.4	156	207.7	102.8	133.5	327.2	25.2	-44.6
362	89.1	167	105	144.2	231.3	105.4	246.2	115.6	245.1	143.1	232.3	261.4	181.8	170.9	100.2	58.4	130.8	181.4	60.7	92.5	78.2	79	214	161.9	336.6	237.6	110.2	126.2	145.6	392.6	197.1	142.8	114.6	152.9	373.6	51.8	109.1	120.3	317.4	126.3	130	143	257.7	75.5	162	178.6	46.5	186.4	128.5
363	282.5	207.3	472.4	154.7	76.5	210.7	194.6	160.2	104.1	153.8	127.8	167	182.1	95.2	65.2	178.4	18.4	186.1	114.4	181.3	177.4	162.6	175.6	151.8	311	136.4	168.2	220	204.9	198.7	160.3	151.5	95.4	228	65.7	315.3	45.3	181.3	97.7	175	184.7	275.4	157.8	178.3	138.8	313.1	131.4	151	140.9
364	647	668.9	983.5	529.2	427	488.6	555	533.7	531.7	785.1	679	671.4	787.5	825.7	469.5	561.8	707.4	591	1092.9	698.2	759.3	409.7	490.7	1016.4	650.2	414.7	707.4	616.6	755.6	864.2	750.5	581.2	754.7	720.4	533.8	655	458.2	439.3	854.7	698.2	816.1	540.8	713.1	949.9	270.8	439.8	962.7	483	671.3
365	17.4	-1.6	19.9	10.7	25.1	8.3	27.5	12.4	12.3	22.5	13.4	11.5	22.9	11	27.4	5.2	-50.1	9.8	12.4	6.3	8.9	9.4	26.2	15.3	6.9	82.1	26.5	12	40.8	12.5	10.7	8.5	28.1	34.7	27.5	10.4	23.2	16.3	40.9	49.5	12.7	21.5	17.3	15	3.9	10	6.7	11.9	11.2
366	109.7	67.2	94.8	24.7	41.3	48	25	61.2	130.4	18.3	25.3	10.1	48.9	64.7	58.5	6.9	40.4	65.5	56.8	2	21.6	15.7	56.7	46.1	61.5	72.6	68.1	35.7	84.9	113.3	-11.6	49.9	49.4	125.7	58.2	46.5	127.1	46.1	145.3	102.7	65.5	53.1	53.4	61.5	92.2	86.6	53.5	52.2	40.7
367	231.7	127.4	171.1	231.4	648.3	355.7	301.6	631.2	269.6	366.2	122.4	695.7	151.2	202.3	173.8	303.3	71.3	268.1	394.4	623.9	171.3	140.2	226.8	165.3	228.6	84.1	154.6	238.7	406	336.8	361.5	191.9	323.8	303	349.5	177.6	293.5	357.7	288.9	544.7	204.3	284.1	426.4	83.1	357.3	148.8	609.3	726	679.9
368	417.4	393.1	420.4	456.2	464	589.2	514.9	382.1	874	326.6	539.9	387.6	355.1	546	358.6	238.5	368.8	256.6	240.7	192.2	417.2	386.6	492.6	408.7	906	440.7	528.7	493.1	595.2	983	468.5	373.6	553.3	566.5	978	379.8	463.1	461.8	506.3	555.1	392.8	639.3	378.9	286.3	519.8	534.5	412.7	434.8	260.6
369	337.6	268	278.4	195.4	109.1	365.1	18.8	186.7	277	245.1	642.2	326.1	242.8	220.5	154.3	447.9	683	67.5	275.5	325.3	187.1	397.4	168.8	334	525.5	277.4	226.8	264.7	324.2	456.3	463.5	221.8	498.5	22.6	175.2	155.1	650.6	212.2	400.6	457.5	8.4	280.9	130.2	247.6	451	235.6	273.2	133.5	473
370	367	171.8	342.8	237	84.7	223.1	315.2	119	115.1	176.8	146.2	126.9	162.7	223.2	231.3	100	124	88	90.6	115.1	197.8	216.6	299.8	128.4	120.1	266.5	207.9	154	241.7	179.1	248.4	277.3	156.5	174.6	485.4	243.5	81.5	139.1	252.5	100.6	121.3	323.5	253.4	201.8	213.3	185.9	43.7	122.2	189.9
371	455.6	488.1	376	881.2	1063	458	390.1	950.2	575	301.7	829	364	649	486.3	743.5	774.9	584.7	370.6	596.6	864.4	268.5	553.1	415.9	333.5	238.7	308.8	521.2	517.5	669.9	329.7	591.7	918.4	407	647.1	353.5	759.7	410.5	547.5	643.4	516.3	475.6	1158.3	915.8	447.9	341.9	466.3	553.3	394.4	335.7
372	-63.8	-27.1	-18.8	-5.8	-10	-51.5	-68.5	-20.1	-47.9	-34.8	4.6	-4.7	0.3	-16.8	-0.8	9.5	13	4.4	-8.6	16.1	-15.8	9.6	-10.1	11.2	-135.4	-106.9	-1.9	-5.1	-82.3	-224.9	-20.5	-4.3	-115.3	-56.6	-70	2.1	-82.4	31.9	-43.3	-33.2	67.2	-39.4	-67	16.3	23.1	12.4	67.2	-44.4	-10
373	1272.8	1812.2	1674.3	622.2	651.3	793.7	449.4	1953.2	1331.4	817.2	493.2	559.8	930.3	631.7	998.4	484.4	256.1	1181.5	774.2	647.2	830	804	1709.9	810	599.5	1078.2	683.4	1052.2	1012.4	907.1	534.2	970.5	633.3	415	450.7	1693.8	1130.8	271.6	400.4	558.1	739.7	1557.4	1257.5	1193.8	1103.2	1031.8	1459.1	756.4	962
374	33.4	84.8	55	85.9	89.6	81.1	53.8	37.9	76.9	38.5	42.6	42	73.2	75.4	105.4	46.5	73.7	74.7	72.4	60.3	53.4	83.2	77	60.5	57.5	108.7	40.3	44.8	104.3	27.3	71.7	111.1	61.7	29.3	66.2	95.5	108.2	84.1	116.2	88.3	90	79.9	66.7	88.5	118.8	85.6	88.5	56.1	51.2
375	416.2	301.6	354.7	290.3	360.7	435.9	366.7	311.8	293.1	205.4	461.6	445.2	484.4	413	359.5	318.7	675.5	198.4	296.1	419.5	359.9	335.1	232.1	404.9	424.6	410.1	369	421.6	370.8	620.7	414.6	397.9	363.7	364.3	743.7	289.1	172.7	262	340	244	363.1	514.1	412.7	284.2	346	366.8	422.9	393.8	394
376	201.3	394.6	224.2	523.7	347.3	374.3	331.7	197.3	297.7	252.6	389.5	327.5	270	326.6	306.1	172.2	442.1	217.9	275.6	307.3	273.6	361	350.4	242.3	285.5	347.5	207.8	341.3	354.8	315.6	362.2	255.9	355.6	536.7	818.8	394.8	380.6	330	441.1	265.9	323.3	284.1	259	227.9	301.8	220.5	409.6	273.4	285.8
377	73.6	2.7	43.5	58	28.1	34.7	74.3	15.3	43.9	36.1	58	91.3	49	24.6	48.9	71	55.8	32.6	18.9	8	17.6	68	66.5	20.9	96.8	93.2	66	91.2	-74.1	-101.5	-39.8	-5.9	3.1	7.8	-51.6	25.5	-24.1	33.9	-42.9	-21.3	81.8	-5.5	59.6	73.6	-17.7	-3.5	31.8	-16.6	18.5
378	190.9	126.8	156.6	245.8	161.5	339.7	241.6	156.9	187.9	124.9	186.9	171.4	117.3	184.3	122.4	58.8	147.8	127.3	199.9	55.2	112.3	129.3	185.8	122.1	279.9	-35	164.6	219.4	482.7	249.5	146.3	134.3	151.1	76	354.2	109.5	304.5	175	413.6	78.6	279.8	347.4	298.4	176.6	209.5	229.9	205.1	106.6	179.9
379	398.5	510.4	372.6	349.8	422.6	589.3	205.6	389.4	337.7	327.4	706.8	386.1	345.8	522.4	467.2	376.7	496.4	356.6	514.2	509.1	308.4	280.5	379.6	418	495.4	507.5	483.2	450.2	890.9	672.2	348	340	633.5	410.4	404.4	255.2	325.9	344.7	494.1	279.4	440	852.4	355.5	331	398.7	378.2	505.8	352	488.6
380	118.7	19.4	34.4	43.2	45.8	17.1	43.5	29.3	120.9	38.5	29.2	29.2	47.6	32	68.6	7.3	28.9	37.2	36.2	27.6	35.4	70.1	66.3	42.1	56.8	-310.7	85.8	34.7	77.9	18.4	-0.6	31.8	51.9	42.8	58.7	58.7	109.9	36.2	54.6	5.9	-10.1	0.7	39.3	75.6	54	26.1	25.2	12.4	69.2
381	163.9	189.6	230.7	686.2	1158.6	472.7	1691.7	641.8	481.7	204.4	57.7	314.2	229.9	442.9	348	263.5	169.9	412.2	264.1	1473.7	191.5	286	653.7	242.7	230.4	335.6	200.8	337.1	475.8	234	1523.3	375.6	683.5	548.8	117.7	306.9	514.5	383.6	326.3	312	246.1	474.3	597.5	149.9	276.2	212.1	342.9	406.3	1088.4
382	-11.1	3.5	-2.1	6.1	-22	-19.2	-60.5	6.1	44	6.4	17.7	0.1	20.6	-10.2	14.6	-4.7	30.8	8.6	6.3	9.8	-1.4	15	15.9	11.6	-31.2	71.3	9.8	-3	-45	-34.7	-19.1	-2.8	-1.6	-62	-116.1	16.8	-29.7	2	9.7	45.6	-68.5	44.1	-32	38	-5.5	-0.7	-17.1	-8.8	5.2
383	211.5	256.7	24.3	173.8	166.2	182.6	130.3	55.6	299	100.1	92.6	71	336.9	141.4	131	95.4	187.7	247.7	136.5	86.7	47.3	182.1	267.6	58.3	364.2	326.3	83.7	270.7	209.7	105.8	-0.9	175.9	244.9	179.7	-285.6	118.9	225	-8.4	387.9	148.5	247.9	292.5	95.4	34.2	789.7	157.5	191.8	173.7	109
384	646.5	913.6	1152	1005.8	719.7	887.9	969.7	533.3	663.8	639.1	1055.6	684.6	845.2	958.1	939.3	910.8	685.8	991.2	664.6	750.8	808.7	935.1	866.5	707.8	1063.4	2148.7	596.5	890.5	788.2	930.2	775.1	1128.8	744	1170.2	1215.1	641.9	772.6	985.8	734.1	532.5	727	959.8	802.8	488	577.4	1131.3	581.5	536.6	704.9
385	247	787.3	627.5	367.2	580.6	200.8	179.6	382.5	87.6	411.3	242.9	321.3	317.5	266.5	369	623.9	398.2	388.3	408.5	400.4	323.2	339.3	384.4	569.4	484.3	62.9	313.6	320.5	715.6	260.5	231.4	661.6	292.9	352.4	236.3	340.7	297.6	68.7	223.2	172.7	353.4	446.7	246.8	267.3	420.3	196	323.5	284.2	248.2
386	255.1	380.1	428.9	308.6	119	54.8	90.9	240.8	297.4	208.8	128.7	139.5	387	357.2	393.5	243.9	273.5	179.1	158	269.3	213	242.4	360.1	147.1	627.5	186	188.5	121.2	-7.9	-7.3	101.8	282.6	136.4	145.8	115.1	425.8	168.4	232.1	100.7	94.5	265.8	206.1	193.5	86.4	264.7	88.5	103.7	98.7	135.2
387	-389.7	-267.7	-195.5	-311.2	-290.8	-258.8	-656.8	-110	-105	-268.1	-315.5	-266.8	-378.5	-251.5	-391.3	-144.3	-332.4	-185.2	-142.7	-155.4	-332.3	-151.4	-232.6	-99.1	-354.4	-160.1	-194.2	-341	-531.6	-904.7	-448.1	-488.9	-108	-641	-972.9	-275.6	-156	-348.5	-224.2	-265.3	-494	-155.6	-579	-260.8	-187.3	-312.3	-270.7	-288.9	-142.8
388	49.3	56.3	58.5	55.5	70.8	77	69.6	41.4	60.9	25.9	51.8	73.2	83.7	55.5	53.5	43.2	55.6	54.8	19.5	45.3	78.6	43.6	96.8	41.5	93.7	101.9	58.8	52.9	152.5	131.1	51.7	81.3	63.6	89.5	133.9	63	132.5	71.8	104.5	84.3	54.6	95.9	70.8	87.2	82.4	93.3	84.7	68.8	61.4
389	48.9	85.8	-8.6	4	-69.2	-41	8.6	-10.8	-29.7	11.4	7.3	-2.3	18.6	-21.7	17.7	5.2	70.1	-40.9	30.9	2.8	4.3	44	6.4	16.6	-14.1	-45.7	-14.4	-34.8	-43.5	-146.8	-17.3	3.7	14.6	-69.3	16	-24.8	-84.3	-81.2	-49.8	-23.4	-7.3	-28.7	-38	4.4	-21.5	-1.9	30.9	-23.7	-60.9
390	374.3	742.9	90.9	580.9	95.5	277	119.7	282.6	-3.7	802.3	450.5	1721.4	96.8	300.7	446.2	206.3	199.5	288.9	131.9	167.1	181.9	92.5	433.4	152.1	59	-38.1	259.6	254.8	109.4	228.5	260.6	297.1	731.7	94.3	342.5	412.6	146.8	132.8	33.4	324.9	69.8	34.2	296	221.5	71.4	30.9	675.9	913.4	1512.9
391	-72	-21.9	-58.3	-4.6	14.8	-24.4	-89.7	0.3	12.1	19.3	-30.5	-60	-47	-35.1	-61	4.6	-19.1	-1.4	32.6	8.4	-88.9	12.8	12	-1.2	-29.3	19.7	-49.8	4.8	87.9	29.2	-53.5	5.7	-41.7	-48.9	12.3	-58.5	2.6	-23	9.4	-8.7	-76	24.1	-27.1	-2	36	-53.3	-12.5	-25.6	-1.7
392	-3.4	28.9	1.2	-3.5	3.5	4.5	-32.2	-8.7	15.2	-11.7	-2.3	10.7	-5.4	1.4	-6.6	-12.5	-31.5	-10.6	-2.8	-2.2	-8.8	6.6	-0.9	6.5	-67.6	74.3	1.8	-3.9	-7.3	-48.3	4.3	6	-0.9	-2.4	-22.8	-9.7	40.9	-12	-40	2.5	1.7	-16.3	-3.8	7.2	10.3	22.4	-3	-0.6	-4.5
393	19.5	28.5	36.6	34	34.5	37.1	42.8	47.9	61.8	21	26	50	56.7	55.5	62.5	27.4	15.6	91.9	54.8	53.7	25.8	26	38	38	96.8	89.8	16.1	34.4	-8.2	32.3	18.2	28.1	61.7	62.4	-1.6	70	79.1	50.2	124.6	87.1	128.7	20.4	62.2	26.7	88.6	75.9	61.4	25.6	38.5
394	-48.5	2.2	-29.6	-7.5	-88	-20.5	-12	-24.6	-4.4	-55.6	-65.6	-84.1	5.4	-19	-18.8	-46.2	-123.3	-14.2	-41.1	-61	-9	-15.9	-26.3	-13.5	-41.2	1.2	43.6	-54.7	-24.5	-155	-50.3	-47.4	25.9	0.8	-176.4	-56.9	-172.7	-14.5	-52.1	19.4	-78.1	-42.8	-67	-22	-37.6	-47.7	-69.7	-92.6	-31.3
395	5.4	13.1	8.6	4.6	6.9	4.3	-9.8	-5.7	-11.6	1.8	-12.6	0.9	39.3	3.7	1.6	7.5	11.4	12.1	21	-1.2	13	0.9	11.3	2.1	42.5	25.6	-2.7	11.6	30.4	-15.5	2.5	37.6	6.7	7.8	17.9	13.1	26	2.9	-19.2	20.1	8.3	-30.4	4.1	9.9	-10.1	13	14	7.6	2.7
396	319.3	157.7	256.3	206.7	163.9	163.8	98.3	89.8	48.7	106.3	129.2	78.2	127	165.1	225.8	64.2	123.7	146.9	124	96.3	113.5	196.8	185.5	128.5	251.1	272.3	116.7	169.6	203.6	316.3	191.8	208.2	118.1	156.4	96.1	138.2	144.4	187.8	199.4	129.6	215.5	144.4	187	157.4	232.7	252.2	101.2	105.8	115.5
397	20.2	28.9	8.2	4.1	21.3	25.3	-12.4	3.7	11.9	14.6	30.7	12.8	17.6	28.3	36.2	21.1	24.8	4.4	-6.1	5.2	14.3	1.7	-4.4	26	29.5	-25.5	11.5	5.6	10.9	9.7	26.6	5.6	7.5	27.3	46.1	11.3	13.5	25.2	16.9	23.1	33.2	3.2	34.5	8	18.2	75.7	12	35.8	2.9
398	7.5	38.9	55.6	47.7	6.3	65.4	69.2	30.8	65.7	22.9	35.4	27.4	46.2	32	63.3	51	47.1	41.1	59	43.5	30	58.9	51.6	71.1	46.7	-23.9	60.5	10.4	66.9	-25	50.1	31.5	20.5	16.1	28	122.1	39.6	96.2	67.5	38.8	36.5	28.9	27.6	71.3	46.7	112.6	123	50.2	77.4
399	2650.4	7500.9	683.7	1177	4013	7295.6	1851.5	2969.2	307.1	2252.2	1656.1	1863	917.4	2153.8	758.6	1001.1	415.3	2107.8	1173.8	3385.2	1875.3	1890.7	1762.7	1843.5	777.6	747.6	2805.3	2998.7	4098.9	2513.8	3371	1664.2	4226.8	1067.3	424.3	839.6	7655.2	1145.6	945.8	2172.4	913.9	5525.1	4149.3	842.4	360.6	2692.7	1539.5	3973.6	3942.6
400	74.4	77.7	153.8	65.4	126.9	217.8	68	58.7	488.1	201.4	161.4	126.3	47.1	49.6	166.3	259.8	102.1	53.3	5.5	122.5	176.2	112.3	257.7	160.2	379.6	125.7	21.5	48.3	-25.3	114.2	499.4	50.4	226.4	115.2	479.6	-19.2	53.8	380.3	136.8	73.1	54	10.8	-14.6	34.7	489.2	114.2	102.7	43.3	18.5
401	224.1	170.4	200.5	236.6	216.8	434.8	209.6	404.3	332.9	230.8	227.7	256.2	346.5	273.5	170.3	247.1	164.5	298.9	343.3	256	251.5	218.4	219.7	241.5	318.4	324.7	253.5	455.5	262.7	438.7	233.7	295.7	311.6	280.6	265.5	301.8	318.5	429.9	603.7	309.5	312.8	358.2	291.9	447.1	439.3	406	159.4	276.8	299.9
402	148.9	196.5	191.7	127.9	60.7	82.6	65.9	60.1	101.6	44.2	93.1	89.4	107.1	107.1	79.5	64.3	100.6	84.7	83.3	58.8	92.3	141.4	101.6	116	96.2	117.8	89.6	97.8	94.7	193.7	78.1	58.8	68.3	117	86.4	246	86.5	151.8	185.3	81.1	98.8	98.2	94.6	188.2	100.3	147.2	79.3	61	46.9
403	160.7	454	200.2	242.6	270.7	999.1	202	110	276.1	163.1	338.3	166.1	314.3	160.3	168.3	537.4	169.9	292.3	248	381.4	174.9	477.6	136.1	215.2	337.1	170.9	130.4	223.9	194.4	224.8	171.7	186	106	144.8	298.3	258.6	163.9	135.1	383.4	540.7	268.6	169.5	122.5	185.9	287.8	298.2	329	123.7	100
404	46.8	64.6	76.3	54.8	72.6	62.3	23.4	44.4	40.2	34.9	27.6	31.3	95.8	64.8	61.9	27.3	80	13.7	27.9	59.8	90.9	68.5	52.7	91	46.2	47.6	31.7	77.4	81.5	56.5	59	63	122	66.3	69	98.5	43.7	63	46.1	32.7	77	22.3	90.9	57.9	66.7	46.8	67.2	37.3	21.4
405	21.3	51.9	33.8	40.9	-5.1	22.3	23.1	-7.3	-7.3	-51.2	-25.6	-58.9	31.3	6.4	9	32	49.1	16.9	-4.5	-0.8	35.2	15.3	24.9	12.6	54	55.1	1.3	52.4	-23.1	139.4	-6.3	28.3	0.8	36.2	-19.4	28.6	92	22.3	68.3	48.1	36.9	17.7	-15.6	20.5	20.5	30.7	-16.4	-24.9	9.5
406	-7.9	87.8	118	102.4	-26.8	164.6	29.6	97.1	84	125.1	114.8	-8.4	108.4	81.6	78.8	62.8	175.2	151.6	215.5	114	61.4	64.4	73.3	96.8	113.8	58.7	114.4	41	176.1	-62.5	107.3	-36.4	-26.7	33.9	-194	64	22.5	104.2	102.1	77.2	115	27.5	-3.3	52.5	169.2	162.7	72.6	37.4	88.3
407	16.6	-11.4	120	62.8	15.3	11.2	-26.4	24.3	136.3	44.2	58.4	-15.5	390.3	630.7	126.6	59.3	134.7	105.3	77.3	15.6	306.3	235	57	192.4	-40	423.7	104.8	113.9	85.6	13.2	107.4	82	153.8	282.2	-98.8	57.6	21.1	20.4	128.8	-6.8	130	-19.6	49.5	782.4	77	-11.1	-7	92.3	115.5
408	-439.7	-69	-170.7	-155.9	-351.6	-273.3	-507.5	-216.2	-347.7	-227.1	-235.3	-408.8	-101.5	-183.4	-316.9	8.6	-46.7	-195.2	-208	-155.1	-256.7	-157.7	-258.4	-123.1	-255.8	-354	-270.8	-275.7	-259.2	-687.6	-360.1	-325.8	-320.7	-367.8	-419.7	-191.2	-331.2	-230.2	-299.4	-242.6	-277.5	-269.4	-443.9	-81.5	-76.9	-307.9	-87.8	-459.2	-260.2
409	-45.7	8.9	-27	-34.6	-42.3	-43.1	-58.6	-6.9	-15.9	-25.5	-32.5	-56	-35.5	-48.5	-29.8	-19.8	-29.7	-32.3	-31	0.2	-33.5	-27	-38.3	-13.3	-31.7	-3.7	-38	-18.4	-7.7	30.1	-14.5	-8.7	-24.3	-29.2	-97.5	-9.8	-24.2	-10.1	3.8	-39.3	-28.9	-46.8	-2.5	-32.8	-25.2	-31.9	-7.8	-6.2	-15.2
410	58.3	58.1	-50	-32.5	-50.8	-53.6	-61.8	-56.1	23.1	0.4	27.7	-42.5	-58.9	23.8	61.8	-13.3	-88.3	-29.9	25.9	-17.2	-80.3	32	-16.9	21.7	269.4	-125	51.1	-87.7	-80.3	23.6	39.6	40.5	57	-66.3	82.5	-39.7	-77.5	-65.1	-19.9	36.1	-62.9	53	-103.6	50.3	38.1	-68.9	-29.8	-69.1	-56.4
411	517.3	697.6	551.7	436.8	215.6	473.5	404.8	433.6	652.3	434.1	425.1	431.6	379.7	499	476.4	143.2	402.5	589.6	605	486.3	340.4	419	472.2	368.5	483	667.4	429.2	510	418.5	125.2	311.9	508.7	402.6	380.2	374.1	377.9	464.5	404.8	487.1	385.9	466.1	368.1	361.2	333.6	528.3	564	374.8	234.3	391.4
412	316.8	372.6	225.2	368.7	233.4	346.3	372.7	324.3	137.9	150.6	408.2	212.2	570.1	310.4	329	90.5	119.6	238.1	201.6	277.2	421.4	298.8	207	393.5	470	442.3	586.3	411.1	377.8	564.1	466.3	378	188.1	490	314.2	444.9	181.2	617.6	325.8	176.4	330.6	305.2	423.1	412.4	135.3	243.5	153.2	344.8	217.1
413	-54.3	-21.2	-30.5	-32.2	-32.1	-38.5	-27.7	-32	-75.5	-31.8	-32.1	-55.6	-30.9	-25.1	-65.7	-3.8	-18.7	-36.7	-26.1	-20.4	-37	-22.7	-44.4	-31.7	-87.9	-39.8	-25.3	-8.9	-56.5	-60.9	-37.1	-61	-43.2	-43.1	-100.9	-27.4	-7.9	-67	-131.2	-37.2	-38.1	-19.2	-29	-28.2	-26.7	-30.9	-19	-49.5	-31.5
414	66.7	5.1	17.7	41.1	11	14.4	34.9	22.8	32.1	31.6	15.2	19.8	24.2	25.7	50.8	28.9	56.1	28.1	33.8	13	18.4	14.7	13	26.1	-10.7	66.6	21.7	19.6	-0.8	-25.4	28	58.5	25.2	10.7	54.1	54.6	-5.8	18.5	67.3	-4	49.3	-28.7	-13.6	20.3	10.1	15.2	25.6	12.9	13.9
415	227.4	106.9	101.5	118.3	114.4	96.4	168.1	92	214.5	158.5	163.2	168.8	105.8	125.1	138.1	55.6	264.9	84.5	86.3	93.9	138.2	109	127	92.5	118.3	111.3	125.4	110.6	101.6	201	77.8	122.3	137.6	154.2	218.4	143.6	115.8	142.1	152.6	148.3	135	150.4	85.1	98	120.8	100	93.2	136.2	72.6
416	62.5	196.3	85.4	32.4	25.9	49.9	60.6	49.1	-44.7	48.9	36.3	34.9	82.4	58.5	46.2	37.4	89.1	130.3	50.5	30.9	58.4	58.2	34.4	77.9	88.1	195.3	62	34.3	31.6	93	53.6	42.2	39.4	99.1	46.7	28.5	61.2	65.3	119.6	41.4	74.4	103.5	42.6	54.5	66	76.2	35.8	49.8	35.7
417	282.8	134.4	106.6	93.2	115.2	164.2	168.8	92.4	246.8	136.9	47.6	103.9	29.1	151.2	125.6	121.3	113.9	5.3	99.7	147	87.5	134.7	30.7	155.4	94.1	111.5	84	124.1	127.1	158.5	254.2	205.5	271.3	52.3	440	42.8	-25.7	69.8	84.2	85.3	24.9	181.5	224.9	89.1	198.2	50.8	109.5	39.3	73.8
418	135.3	278.3	99.5	31.6	217.8	220.1	121.9	103.4	25.4	86.9	197.3	60.9	75	60.2	93	155	143.3	91.7	154.6	175.7	87.2	61.4	129.3	66.8	117	42.9	107.3	86.1	169.3	168.6	238.7	263.1	100.1	127.4	34.6	62.1	109.8	122	59.7	78.8	70.2	34.1	93.2	72.7	74	159.4	17.7	79.5	98.5
419	92.1	32.5	47.5	34.5	35	16.6	85.1	103.4	51.5	104.8	127	50.7	46.4	66.5	152	50.9	41.1	36.3	125.4	107.6	30.3	25	53.5	49.4	32.2	-6.1	85.2	8.3	95.7	66.4	88.4	75.2	113.8	18.1	48.7	22.2	111.8	52.1	48.4	47.6	46.1	68.1	71.6	23.1	40	80.8	27.3	61.8	53.8
420	46.3	47.8	23.9	5	27.7	57.8	13.1	34.7	31	10.3	26.7	25.7	49.5	31.1	59.3	14.9	-4	39.8	29.5	29.7	44.9	25	36.1	40.5	30.5	48.5	21.5	35.3	-19.4	76.5	22.2	37.2	32.6	30	-6.5	61.2	100	44.4	68	21.2	58.5	39.5	52.1	32	40.7	31.8	36.8	43.9	14.2
421	0.2	4.7	-0.2	-4.6	7	15	3.6	-9.1	-29.9	2.7	-8.5	-5.7	7.5	10.3	11.3	-2.4	-1.9	5.4	-19.9	1.7	-8.7	-2.4	9.3	7.4	-20.5	14.5	7.5	-17.6	-41.2	-6.4	6.6	8.9	-15.3	20.3	-13.4	6.4	11.4	9.8	36	-3.9	0	-2.3	-2.9	-15.5	9.5	5	2.2	-2.3	-3.8
422	95.2	93	103.8	83.4	14.1	150.8	79.3	91.4	-1.7	61.9	324	56.7	159.3	172.9	94.8	28.6	76.7	120.3	82	40.1	129.1	259.1	208.4	108.1	52.8	250.5	119.4	115.1	64.8	170.4	146.3	78.1	15.9	146.4	-54.6	280.9	-22.9	57	-15.8	72.7	100.7	21.5	103.6	93.4	12.4	78	39.1	112.2	21.3
423	236.5	255.5	234.6	116.5	236.8	116.4	199.1	133.5	257.4	75.3	166.6	131.2	182.6	174	209.3	110.6	158.7	85.6	209.6	216.4	171	261.6	131.9	166.3	378.7	247.6	136	172.3	206.9	190.6	186.1	168.9	176.8	101.8	201.5	136.8	185.8	219.2	301.5	62.3	252.3	250.6	118.3	233.7	279.2	199.5	176.8	131.7	131.4
424	221	115.8	159.9	139.1	113.7	190.5	176	97.8	202.4	83.6	162.7	146.6	64.1	150.2	142.8	87.5	151.8	101	84.3	71	137.6	113.8	124.5	95.6	304.4	274.7	130.3	133.2	151.8	189	-11.6	14.3	-0.7	140.8	272.3	95.8	190.2	122	98.5	130.4	36	175.9	28.4	104.1	154	134.1	136.8	141.4	82.4
425	54.3	95.2	129.9	76.2	66.9	80	54.6	130.3	195.1	47	68.4	65.1	73	106.6	112	139.3	40	141.2	102.3	102.7	77.1	104.6	85.2	96.6	110.8	163.4	56.5	94.7	71.9	48.8	72.7	91.6	215.2	95	64.7	145.9	192.2	182.7	179.4	139.8	143.2	93.5	118.9	148.5	140.3	153.9	286.4	47.3	115.7
426	4	14.9	20.1	15.2	12	14.6	25.1	19.3	61.8	2.5	7.1	-1.4	24.8	24.7	6.5	14.5	12.6	22.7	15.4	3.7	31.3	21.5	18.8	26	14.6	31.3	14.4	4.8	1.9	76.1	-8.3	2.6	61.2	17.9	21.7	20.5	23.1	21.5	49.1	23.9	7.9	-1.2	11.7	11.6	17	30.6	1.5	14.7	35.6
427	287.7	619.4	292.4	284.6	325.3	478.9	342.8	331.5	319.7	310	320.2	262.4	383.6	502.1	337.9	352.4	370.8	369.4	278.7	187.2	424.2	404.7	347.9	468.2	371.2	433.8	434.8	592.9	628.4	627.3	509.2	454.6	542.7	526.9	322.3	376.9	210.9	386.8	1042.2	479.4	285.8	392.9	446	317.7	322.1	817.3	353.2	429.2	367.1
428	73.4	48.5	23.3	33.9	37.9	72.8	83.8	29.7	36.9	35	50.4	35.7	66.1	47.3	81.7	42.3	42.1	16	23	36.8	74.2	54.1	39.4	32.6	63.3	28.1	87.7	64.6	18.6	56.8	44.3	56.6	55.9	66.7	172.5	40.4	8	40.5	31.5	37.4	41.1	21.6	29.5	18.2	47.7	77.7	26.2	28.8	7.6
429	76.8	75	59.2	44.2	19.1	61.3	51.2	140.8	11	64.7	20	1.5	73.5	57.8	76.6	72.3	33.8	29.8	62.3	89.1	88.3	132.1	41.2	160	-22.1	41.9	97.8	72.4	36.4	46.8	75.2	89.8	63	35.1	-7.5	100.7	53.8	44.6	80.4	69	48.5	48.8	133	54.9	79.9	29.4	90.9	41.2	57.1
430	34.5	14.6	33.8	35	84.7	16.8	30.8	49.9	95.7	23	23	34.6	53.1	48.5	67.4	54	10.9	37.7	31.7	19.3	60.6	21.9	44.2	71.1	30.9	37.3	58.1	92.5	61.6	64.2	51.6	67.1	60.9	84.5	51.4	29.3	90.2	67	55.3	118.8	39.3	40.4	80.9	17.7	58.5	67.6	54	51.6	26.8
431	451.6	726.2	453.7	606.7	492.9	664.2	459.1	388.5	512.5	401.5	746.4	594.5	476.9	510.7	440.9	426.3	504.8	519.8	474.4	494.2	436.5	447.1	583.4	423.2	786.4	791.1	455.4	643.9	647.1	508.2	404.2	400.7	580.1	546.1	605.5	474.7	598.2	630.2	925.8	697.5	535.4	714.5	417.6	437	736.3	650.9	664.6	475.2	527
432	17.2	28.9	8.2	19.6	17.6	0.9	4.6	12.1	-55	11.9	39.2	19.8	17.1	0.7	11.6	10.4	31.2	12.6	2	27.6	14.4	37.4	-7.5	9.9	-45	60.6	8	19.8	127.3	59.9	14.5	25.9	17.9	-19.4	107.5	18.3	29	24.4	2.3	58.4	37.8	-87.7	16	17.8	28.6	-12.1	-12.9	-1.5	7.1
433	-56.3	-40	-17.5	-27.1	-56	-20.4	-29.9	-4	-84.9	-16.5	-7.7	-27.2	-26.7	-26.2	-16.6	-2.5	-21.9	1.9	-15.5	-11.6	-1.3	-9	-13.2	-17.7	-68.7	149.9	-27.9	-34.9	-68.2	-30.2	9	-7.4	-20.2	-35.8	-19.7	-17.5	-35	-21.7	-53.8	-29	-3.9	-80.4	-40	-27.2	-12	-5.8	-16.8	-14	-18.7
434	179.8	76.3	55.3	32.6	143.7	99.5	-157.1	35.7	79.9	81.2	39.9	16.9	33.4	46.1	37.3	90.5	27.9	76.3	16.6	100.6	68.8	58.1	120.8	60.9	188.8	196.7	60.4	98	96	-19	-97.7	28.5	80.6	39.9	68.6	109.6	-230.7	122.3	56.5	90.8	-29.2	141.1	50.6	62.2	70.8	21.3	124	24.7	65.9
435	-14.3	89.4	108.3	43.6	29.7	120.4	97.3	45.3	1.5	54	24.3	24	46.8	42.5	71.9	46.5	124.1	120.8	49.5	18.7	73.5	36.9	76.3	78	-3.6	122.6	72.3	100	58.5	-10.8	60.1	99.8	31.9	65	12	128.1	-57.3	36	54.7	19.5	157.7	24.6	42.1	60	76.7	-27.4	55.6	5.3	75.1
436	67.5	123.4	169.9	48.3	35.5	65.9	1	66.2	96.6	51.6	140.5	79.5	94	87.5	115.4	61.7	128.7	116.7	94.3	89.7	52.8	89.6	48.9	73.2	149.3	182	37.5	41.3	20.9	64.6	76	152.8	75.7	73.1	71.3	153.2	109.1	162.8	160.8	88.8	114.1	47.6	28.3	98	103.4	90.9	104.4	55.5	81.5
437	517.1	242	265.5	276.7	212.6	213.3	275.2	192.8	279.1	240.3	227.7	267.1	257.1	261.3	239.1	151.2	498.3	135.7	191.9	121.4	267.8	225.1	244.8	181.2	209.9	256.9	235.6	196.1	268.8	228.3	227.3	315.9	236.2	256.9	523.1	190.1	152.3	178.6	211.8	226.7	98.7	241	241	230.2	87.8	168.4	210.1	150.5	162.4
438	164.3	225.2	276.5	182.5	153.6	198.8	110.5	176.7	99.8	244.3	453.8	229	301.6	243.4	244.2	268.1	354.7	180.4	229.3	263.6	122.2	220	147.9	199.5	333.4	507.5	209.9	158.1	152.3	122.3	130.8	194.1	62	141.2	198	316.3	72.6	340.2	97.2	153	463.2	191.6	95.4	244.8	237.3	265.1	198.5	102.7	146.4
439	144.8	151.5	215.2	146.1	136.2	161.3	122.5	96.9	260.6	123.8	210.1	117.6	166.1	140.4	202	149.6	146.9	201.7	246.5	183.9	146.2	180.2	64.6	155.4	219.4	253.1	165.5	105	152.3	173.4	197.3	150.3	199.3	150	316.2	232	130.6	249.5	257.6	256.1	257.2	94.5	119.2	203	294.3	203.7	418.2	123.3	168.8
440	185.1	418.1	456.6	235.9	287.8	136	213.3	168.5	102.9	359.9	150.8	286	357.9	296.7	374.8	140.5	379.4	162.2	254.2	250.1	198.3	277.2	165.1	265.2	357.5	447.4	179	172.9	256.8	264.8	243.5	390.2	201.3	340.6	151.8	438.4	178.3	404.7	149.8	44.5	439.9	4.5	262	154.1	242.5	496.2	158.2	221.2	109.4
441	397.6	992.8	685.9	668.9	495.2	583.8	358.5	595.5	61.9	699.1	331.5	922.2	749.3	667.2	446.6	781.9	1473.5	861.4	736.3	638.6	307	574.9	546.2	579.1	230.7	735	448.2	459.1	889	933.1	579.3	1157.1	949.6	1003.9	187.6	499	716.4	548	418.7	508	1042.9	380.4	782.8	694	289.1	505.4	522.5	557.3	842.3
442	-205.2	-20.9	-35.9	616	-141.3	-79.2	-250.2	102	2.9	-14.3	-65.1	35.9	13.9	267.7	-75.7	-22.9	2.2	112.6	133.5	62.5	30.7	174.7	-23.4	100.7	-121.2	-152.2	-55.3	192.2	-377.6	-414.1	-20.3	-119	-77	-207.2	-462.2	-92	143.8	-13.3	341.4	372.2	-168.2	100.8	-165.6	-18	48.8	95.7	-106	81.8	231
443	410.7	143.9	141.9	135.5	145.2	147	638.1	137.6	518.4	213.9	300.4	429.3	137.3	133.4	200.4	58	250.8	140.4	117.7	146.4	348.7	196.1	210.9	269.6	424.6	174.2	239.3	292.7	387.1	229.6	215.4	397.7	213.4	347.3	652.2	210.8	115.4	104	103.3	332.8	83.8	141.5	385.5	175	228.9	131.2	104.6	392.3	45.5
444	-1.8	19.6	4.3	11.9	-6.6	1.2	26	0.6	-70.9	4.6	25	15.7	4.7	9.1	2.3	-3	24.9	19.2	17.4	-6	-18.5	-1.2	9.4	4.8	-11.3	-42	4.4	14.2	-1.1	-8.4	15.9	6.4	-3.7	12.7	5.8	1.4	-3.2	17.7	21	18.8	17.4	-3.9	16.3	6.4	6.5	9.1	6.2	22.3	12.2
445	-98.5	117.2	7.3	58.4	-98	-74.8	-48.3	2.6	23.1	8.7	-10	-24.5	93.7	-63.5	-61.1	33.3	182.6	40.3	-65	56.4	-38.5	27.9	-60.8	-8.8	-18.2	-46.9	-69.3	-18.1	-42.2	-270.4	-25.8	52.9	11.9	134.3	133.9	48	-85	24.1	-55.8	54.7	176.7	-60.3	-169.4	65.8	39.7	18.6	96.3	-0.7	-70.6
446	96.9	-90.3	123.2	480.2	339.9	71.9	399.1	641.9	41.7	264.1	205.1	348	27.2	134.2	551.2	178.6	155.4	153.7	28.1	370.6	164.2	94.2	383	52.9	-115.3	-238.4	322.5	299.8	309.8	313.5	209.6	141.1	461.8	73.3	-58.7	16.1	288.9	335	-275	156.8	248.1	12.4	163.7	-33.4	65.1	171.2	262.9	413.7	644.7
447	932.7	521.5	2127.5	619.5	1589.4	289.1	229.7	2428.3	273.1	619	1060.9	739.4	639.5	310.8	261.8	2779.5	64.3	512.4	1186.7	1187.8	384.6	1175.4	453	1210.1	773.3	282	728.2	890.4	3727.5	2030.8	394.5	365.3	657.2	290.1	206	723.1	1410	256.6	271.1	1323.6	180.4	1589.7	879.3	1681.1	358.2	389.3	618.1	768.4	464.5
448	-39.6	-39	-15.6	-29.1	-102.9	-5.2	-52.3	-12.1	18.8	-0.1	-27	6.9	-26.5	-18.2	9.5	-23.4	-19.6	1	-31.9	1.8	-19.6	-6.9	-26.8	1	-118.4	-58.4	41.9	-6	-34.7	-146.5	-86.4	-27.9	-38.4	-81	-138.6	28	-51.3	-70	-27.7	-26.8	-52.8	-3.6	-60.7	-17.3	11.7	-54.4	-19.5	-19.4	-14.2
449	202.2	195.9	257.8	280.5	269.4	287.4	503.4	309.1	479.1	473.8	283.6	210.8	181.4	226.3	254.5	686.3	166	376.4	325.3	471.1	236	293.7	238	203.9	320.6	191.1	275.4	341.6	363.5	248.6	204.5	413.9	208.1	251.9	383.1	402	318.2	407.2	245.2	340.4	488.9	270.5	276.1	167.3	529.3	551.3	463.9	380.4	230.6
450	499.7	262.6	509.6	288.6	145	258.6	471.8	239.6	369.3	406.1	381.1	314.9	423.7	609.7	269.6	272.1	1409.3	249.5	219.8	155.4	338.5	368.8	352.4	237.7	246	389.9	187.3	245.9	305.7	118.6	281.2	412.6	418	501.3	773.1	341	156.5	267.9	331	74.2	383.8	212.4	219.2	467.8	214.1	252.3	282.6	248.4	258.1
451	61.9	28.9	32.5	23.6	130.9	96	104.1	54.3	149	35.4	92.7	118.7	79.5	44.1	49.1	58.2	30.2	54.7	47.8	37.7	10.7	38.2	51.1	121.1	164.8	106.5	20.7	68.1	90.1	166.7	-6.5	19.7	114.8	109.2	-40.1	96.9	67.9	8.3	136.3	88.8	-27.9	29.3	120.9	116.5	104.2	178.3	-0.4	60.3	72.7
452	131.5	44.8	27.5	75.4	216.5	37.9	160.3	78.8	107.3	21.4	39	94.2	26.2	79	106.5	515.3	18.8	44.1	93.5	298.7	81.1	32.4	41.8	48.8	3.8	91.2	101.1	287.4	320.9	424.7	111.1	79.1	86.2	82	116.6	55.7	173.5	74.6	181.1	549.8	41	195.7	110.8	44.8	76.7	138.9	88.3	50.6	70.3
453	554.9	584.5	695.9	764.1	672.1	741.6	557.4	542.5	915.5	401	783.8	613	607.2	1028.2	464.9	521	532.9	738.9	1160.9	725.6	474.4	435.4	882.6	459.4	558.7	680.8	419.4	591.8	315.1	582.8	542.2	886.6	356.1	781	433.3	709.1	721.2	843.5	740.5	523.4	621.6	863.7	494.7	687.9	875.4	1963.1	1089.4	499.6	383.2
454	271.4	453.1	447.8	405.4	333.5	392.1	461.6	366.2	547.8	319.6	328.2	317.9	546.6	666.7	243.1	289.7	262.6	295.5	243.8	355.5	329.9	515.7	565.6	285.6	821.4	607.7	335.2	419.5	580.2	827.4	448.5	405.1	307	452.9	687.4	686.2	536.2	558.7	596.8	691.4	357.4	615.1	419.4	361.7	323	546.2	291.7	604.3	449.9
455	13.6	13.9	11.2	-21.9	9.4	32.8	38.8	12.7	62.2	-3.3	46.6	35	10.2	-14	-18.5	3.1	80.3	11.4	8.3	11	5	14.6	21.8	10.4	94.4	27.6	42.6	45.3	50.9	117.5	24.1	22.6	18.8	43.1	-46.5	17	17.7	-19.3	-5	42.7	-1.6	7	47.6	-13	107.5	2	19.7	46.6	-1.3
456	-151.5	-163.4	-159.6	-141.2	-226.1	-121.6	-223.1	-111.9	-246.9	-90.3	-122.9	-111.4	-133.1	-215.1	-167.7	-72.4	-130.3	-107.1	-91.2	-67.7	-233.2	-131.6	-128.4	-92.8	-358	-255.9	-201.1	-216.6	-339.9	-534.7	-191.3	-182.9	-217.4	-299.9	-609.3	-161.8	-193.7	-149.9	-326.9	-191.4	-216.6	-270.7	-268.1	-155.9	-144.2	-120	-90.1	-259.5	-101.3
457	170.1	164.8	199.6	172.5	51.2	108	2.4	147	181.1	103.7	172.3	49.5	152.4	242.5	119.4	228.6	405.2	210.6	193.4	105.8	201.5	202.3	167.7	157	357.6	399.8	152.1	172.9	30.5	169.2	65.4	197.1	197.8	124.9	330.9	111	36.8	197.4	410.4	179.5	645	279.4	146.1	168.5	154.6	370.8	189.9	82.4	178.2
458	120.7	139.9	420.5	112.4	73.4	649.5	94.3	469.9	48.6	597.2	-24.6	41.2	356.6	384.7	-115.5	-41.9	12.3	1040.4	28.3	-69.8	273.8	704.1	597.7	298.2	3.8	432.5	415.4	327.4	277.1	-76.7	412.7	607.3	-157.2	662	-163.8	690.8	148.3	439.8	80.2	-88.5	204.9	404.5	362.7	98.9	57.3	597.8	-114.4	315.1	652.8
459	-96.4	93.3	89.1	74.9	-15.2	60.3	-65.7	110.3	42.9	-24.3	-28.2	-53	49	54.3	79.9	22.2	-65.2	74	90.7	39.3	-2.5	5.5	60.2	126.4	47.4	124.1	158.5	118.4	188.5	-49.7	-5.9	15.8	35	-31.5	-55.9	60.6	-266.9	-205.6	36.5	74.3	-37.6	92.5	-15	66.2	0	103.6	-43.1	-19.8	13.4
460	-127.1	-158.3	-33	-36.7	-31.9	129.7	-296.4	37.1	2.8	-85.5	27.4	162.4	-23.4	-110.9	-77.7	-13	81.8	-97.6	81.5	11.7	-259.5	-5.8	104	-38.3	59.2	-107.9	-57	77.1	-375.4	-392.4	-148.6	-197.5	-184.6	-132.1	-534.6	-126.5	60.4	-189.2	-157.1	-22.1	-112.6	-91.6	-425.1	-17.1	-184.3	-95.4	-52.5	213.4	-16.7
461	46.6	-2.7	48	37.6	16.4	109.5	16.1	32	18.7	10.1	33.5	37.4	63.8	48.9	20.7	27.3	23.1	37.3	30.2	25	52.5	51	10.1	41.1	40.3	83.8	13.7	72.2	7.1	60.5	30	27.4	32.1	43.5	-2.9	18.3	76.8	46	61.7	30.5	71.3	77.3	21.8	23.8	31.6	67.2	43.6	61.1	32.5
462	5.2	47.5	-11.1	1.6	34	21.9	10.2	1.3	32	-4.3	14.9	4	4.3	-14.3	14.4	-7.3	6.6	-2.1	4.8	11	17	20.1	0.3	19.2	1.6	0.5	5.6	15.2	10.7	15.8	18.3	-5.7	15	25.6	33.5	16.3	53.7	-2.4	26	2.1	8.4	9.4	2	10.7	24.3	15.8	3.6	14.7	17.3
463	359.1	259.5	302.1	247.6	335.7	359.4	346.8	223	273.2	335.3	662	467.6	228.7	322.6	287	255.3	472.7	165.4	300	274.3	217.6	196.8	185.8	344.3	188.1	239	258.6	277.9	282.3	359	322.6	223.5	212.3	209.1	652.8	196	193.7	204.3	275.1	160.5	234.6	272.7	278	244.4	232.9	254.6	236.8	315	273.2
464	743.8	582.9	1116.1	507	926.5	577.5	731.6	582	823.5	939.2	462	684.2	1208.7	574.5	1244.5	308.2	545.4	894.7	881	742.6	970.2	928.6	568.1	896	649.1	735.4	586.5	784.1	630.6	349.4	800.8	1079.3	515	1073.4	581.9	456.1	513.8	655.3	813	468.1	689.1	272.7	767.2	834.6	1175.6	699	546.6	577.3	1098.9
465	125	116.6	29	24.6	-7.2	110.4	112.9	84.7	-17.5	85.7	1.4	110.8	61.4	38.1	59.9	135.6	-26.1	43.6	29.8	66.3	43.4	69.6	113	88.8	17.9	70.8	58.3	26.2	113.1	-6.3	60.1	89.4	159.5	64.2	-19.3	75	145.2	30.1	-48	19.3	66	14.2	135.3	30.4	85.8	15.3	23.7	83	93.9
466	35.6	39.2	15.2	17.9	19.5	5.6	37.2	9.5	34.1	8.7	11.9	9.1	11.4	19.1	27.1	0.3	17.7	11.1	12.6	4.3	34.9	14	21	26.7	13	23.8	20.4	23.4	-2.3	28.1	-10.2	39.4	5.2	35	27.6	11	7.5	24.4	18.3	-3.5	17.8	17.4	41.6	7.9	3.9	15.6	20.8	11.3	9.7
467	-231.9	-43.3	-40.2	-84.4	-107.7	-80.9	-302.6	-62.1	-142.5	-112.3	-87	-157.9	-75.5	-66.1	-148	-78.2	-125	-77.8	-84.9	-57.8	-121.3	-62.3	-109.2	-106.4	-163.6	-78.9	-101.4	-99.5	-137.2	-205.6	-94	-87.6	-20.8	-141.9	-188.9	-71.9	12.2	-39.1	7.3	-151.5	-98.2	-90	-108.1	-84.1	-58.1	-93.6	-67.7	-152.7	-96.8
468	58.2	-17.7	22.4	0.9	21.9	-1.4	-62.4	-40.3	-135.4	-11.5	-11.2	23.6	-24.4	33.8	-49.6	7.8	10.4	-2.7	53.8	24.8	-21.5	-20.2	-1.3	-17.3	-101.5	-118.9	2.4	-5.5	-6.9	67.5	-20.8	-46.3	-38.6	-138.7	-262.7	-11.5	-62.3	-9.8	-67.9	-22.8	58	60	-86.6	-44.3	-46.9	-95.3	21.9	-16.4	-9.3
469	-353.5	-153.3	10.5	-5.5	66.7	-10.9	-110.6	578.3	95.9	-94.2	-191.6	-55.3	-21.8	44.4	-156.4	118	-35.3	66.9	52.1	144	-45.8	83.1	394.6	18	19.3	96.9	254.5	1.4	-443.3	-398.2	74.5	35.5	160	111.4	-360.1	62.6	44.1	33.7	87.8	337.3	200.4	109	246.7	85.7	-7.9	127.6	243.5	-82.3	369.5
470	48.8	82.5	142.8	127.1	95.4	135	69.5	66.3	144.3	125.2	138.4	71.9	145.1	150.6	100.1	38.6	62.5	180.7	173.2	134.4	140.1	102.1	122.5	100.3	166.2	127.7	38.9	96.4	125.6	144.6	89.9	166.1	45.5	157.9	147.4	188.3	103.7	157.2	335.6	47.6	264.4	64.4	160	100.8	114.4	169.3	156.3	109.3	158.1
471	44.7	48	24.3	-9.7	-0.9	136.4	88.1	23.7	31.3	72.9	58.3	63.9	118	16.1	72	-9.5	114.2	5.2	24.1	-1.3	212.3	-28.3	27.2	184.8	-22.8	9.4	40.7	175.9	141.4	180.6	118.3	130.3	39.7	192.4	41.2	57.6	14.8	94	-65.2	45.4	186.4	128.7	182	32.6	26.8	16.9	93.7	99.8	50.2
472	102.3	-2.5	25.7	19.7	-15.1	44	33.8	12.6	40.2	-6.3	45	57.3	59.6	55.5	21.6	16.7	38.3	-21.6	20.9	12.7	89.3	9.9	54	22.9	-25.2	-55.5	51.5	61	9.7	104.8	30.7	73	107	-11.7	41.1	20.9	-11.2	21.4	3.7	77.4	11.2	56.8	-45.1	-17	25	-1.6	7.2	25.5	6.6
473	48.4	52.7	49.6	40.5	55.7	38.2	89.4	74.4	56.3	15.1	39.9	23.8	44.5	39	29.4	34.7	16	45.1	40.2	26.7	30	21.6	30.2	10.5	96.1	65.7	55.6	43.2	69.6	47	15.2	61.3	79.3	78.9	25.3	206.6	28.6	104.7	28	54.3	79.7	112.3	99.9	24.2	47.5	45	69.7	44.8	33.1
474	-50.5	61.8	21.3	41.6	-73.2	-34.8	-27.3	-0.3	-13.2	-37	-15.5	-29	30.3	23.5	65.4	54.3	17.4	-7.8	25.5	45.8	15.8	37.1	19.2	8.7	-3.2	57.6	34.8	44.6	21.1	86.1	20.1	45.1	-10.3	33.4	-22.9	64.7	27.2	-15.3	-4	-19.3	53.8	-39.5	-3	-2.7	90.6	-22.2	31.1	-52.5	-14.1
475	121.5	251.8	372.7	387.4	245.2	313.2	367.1	69.5	234.2	243.1	436.7	140.9	462.3	344.1	200.7	280.2	226.3	267.4	254.1	132.1	373.1	270.6	277	298	83.7	542.3	280	342.8	419.7	551.9	405.7	496.1	200.6	466.2	156.9	471.7	150.6	42.9	378.5	283.7	413.4	616.1	224	315.9	375.9	271.9	146	321.6	140.2
476	7.1	-36.6	-3.2	-13.3	-10.8	-40.1	-57.1	-38.1	-93.2	-41.5	-30.7	-56.1	6.8	-35	-24.9	-2.4	-72.7	-26.7	-22.1	-37.3	2.1	-11.6	-23.4	-11.4	-2.4	-29.7	-41.2	-4.4	-61.1	-48.7	-40.5	-3.4	-34.7	-16.4	-12.7	-44.9	-41	-16.9	-67.6	-27.6	-32.3	-60.1	-70.8	9.3	-61.7	-96.3	-42	-31.5	-52.4
477	383.6	66.3	397.7	166.3	206.7	155.7	173.7	368	265.4	199	63.5	220.2	412.6	154.8	361.9	435.9	627.3	70.3	270.3	565	464.5	515.8	207	440.8	307.7	210.3	405.1	334.4	553.9	188.5	554.9	266.3	271.6	331.1	538	272.7	301.9	300.9	581.5	327.7	337.6	446.8	171.7	330.6	370.3	364.4	489.2	203.9	157.9
478	62.8	35.7	33.7	66	63.8	54.1	-4.9	-21.7	56.8	-8	-23.6	-27.6	101.2	33.2	36.9	85.5	116	-34.2	46.4	-6.4	113.4	120.4	191.8	29.6	-89.2	70.6	51.4	46.7	86.2	-145.8	32	84.9	-26.1	49.5	36.8	39.4	16.2	9.6	-31.2	-0.2	69.6	50.4	43.6	-2.5	12.8	-62.9	38.9	-32	-10
479	-36.4	48.6	-6.7	-11.7	-7.3	-7	-28.3	-15.1	-79.4	-7.3	-0.2	-20.3	1.2	-35.7	-24.1	-20.6	-11.2	-6.4	-10.9	26.2	-16.1	2	-21.7	24.5	40.6	-49.3	0	-40.6	27.9	-73.2	0.3	-40.7	-58.6	-66.1	-68	-5.3	-25.5	-49.6	-58.2	45.7	-13.5	-33.8	-45.6	-21.3	-41.6	39	-29.3	-26.8	-18
480	93.3	291.8	670.4	485.6	172.3	52.8	210.4	145.5	43.8	94.9	95.3	47.1	392.9	176.1	194.9	188	17.1	61.8	81.9	91.2	348.1	802	82.3	202.8	7.8	103.7	216.7	265.1	143.9	285.2	259.1	373.5	75.3	272.1	59.4	399.1	29.3	142.2	188.1	124	342.1	218	264	386	29.9	103.3	136.6	32.7	60.7
481	169.2	62.7	66.2	104.3	77.1	127.4	133.9	67	98.9	87.2	115.8	103.3	89.9	112.1	96	50.1	144.6	100.3	106	71.6	95.3	72.6	92.8	115.2	95.4	142.6	145.3	143.6	53.4	137.7	113.1	141.7	164.7	147.4	171.1	128.1	215.7	147.6	197	116.4	127.3	87.9	111.7	93.9	137.9	177.6	143.6	121.5	98.8
482	112.1	10	67.9	84	222.3	49.5	218.9	24.8	203.8	13.7	48.3	22.1	208.5	68.7	127.3	54.3	-6.1	57.6	16.1	22.9	95.3	53.7	116.6	103.5	-59.9	136.5	60.6	65.5	106.8	402	139.7	141.9	45.4	85.9	183.1	100.6	127.7	23	158.2	64.6	121.3	-102.2	121.7	134.9	27	149.4	68.3	19.9	43
483	171.3	190.9	206.8	169.4	128.7	132.2	163.3	145.3	157.1	136.1	239.2	153	183	198.1	163.2	142.8	85.1	171.4	322.8	130.5	160.3	205.3	162.4	200.7	239.7	295.1	190.4	235.1	257.7	368.1	167.3	181.9	154.5	182.4	230.2	159.5	135.7	174.7	268.9	227.2	132.5	272	139.5	162.5	135.8	166.1	135.2	154.8	112
484	148.4	149	109.6	110.7	85.2	103.5	74	42.4	86.1	73.6	59.5	55	81.8	72.5	94.4	22.8	93.9	24.3	31.3	23.7	108.5	113.5	102.5	80.7	16.7	75.6	129.5	62.9	147.2	101.6	38.9	97	30.2	61.3	47.1	63.8	61.9	82.5	89	54.4	80.2	57.5	43.5	58.7	61.4	68.6	78.9	51	70.8
485	-101.9	365.8	87.2	-16.8	-212.3	47	-432.8	35.9	68.9	-61.6	-224.1	-188.8	112.2	-143.9	89.4	59	16.9	32.9	100.6	164.2	119	225.7	10.9	163.3	352.3	20.2	153	134	121.5	-339.9	97.4	-28.3	173.5	17.3	169.7	-115.6	171.8	-230.7	20.6	50.2	-171.5	423.4	14.5	25.3	47.5	-30.7	79.8	-155.4	46.8
486	-32.2	-15.2	50.9	52.3	-69.7	0.4	13.6	-37.4	0.5	15.7	68.4	45.3	-4.8	7.6	70.1	144.4	63.1	-19.5	27.4	77.1	33.2	45.8	4.4	74.2	391.5	5.4	22.9	173.2	8.4	51.5	33.1	-19	-11.5	-68.3	-58.1	-15.4	-29	-44.3	10.5	35	69.2	-63.4	-58.2	-16.2	42.6	48.6	42.2	-31.6	30.3
487	12.5	101.2	41.2	19.5	73.4	25.6	71.9	-9.9	27.4	25.5	47.2	25.2	41.8	21.2	-9.9	22.3	39.6	26.1	17.7	14.6	27.4	23.8	37.3	51	44.2	152.9	21.6	18.9	56.9	46	-20.6	26.1	31.4	75.6	-3.2	8.1	29	36.6	109.9	20	82.3	40.8	45.1	5.9	35.6	24.2	67.6	48	17.6
488	132.8	213.3	185.3	68.9	171.4	192.1	116.8	160.1	108.1	273.8	205.9	96.7	119.8	94	93.6	202.7	96.1	181.7	220.3	221.5	126.2	56.8	143.4	121.3	130.6	172.9	133.4	134.4	152.9	238.5	287.6	209.6	219.5	107.1	61.4	182.6	150.8	280.8	207	163.9	257.4	18.7	106.2	135.9	177.6	172.8	299	120.9	116.8
489	83.2	101.3	80.2	63.9	96.7	57.2	41.5	72	100	82.5	88.3	65.5	63.4	75.6	67.6	58.5	191.6	81.7	112.7	90.4	57.2	96.4	51.7	79.5	9.6	72	59.8	64.7	105.7	14.3	94.4	92.2	106.3	62.2	40.5	104.8	44	115.3	215.2	92.1	65.9	41.7	66.1	123.3	122.2	88.6	201.7	64.4	59.6
490	-108.1	12.1	64.2	5.1	-51.1	-13.1	-77.7	21.4	-23.8	-20.2	-21	39.3	-25.6	58.9	-16.1	23.9	-25.4	11.4	-19.4	-6.6	-28.6	-18.2	-1.1	60.8	-165.8	120.2	-13	24.6	-140.2	-99.4	78.2	-66.5	-84.2	-3.7	-179.7	124.6	-52.8	122.9	39.6	-35.6	53	-17.8	14	10.6	22.4	64.4	27.3	-41.5	21.2
491	26.9	29.1	83.1	3.6	12.1	6	-11.9	20.2	10	13.5	-24.1	-23	43.5	7.3	21.3	2.2	-17.7	47.5	-5	14.9	10.2	28.1	41	38.4	77.8	37.3	27	18.2	80.8	-71.9	67.3	8.6	25.4	42.4	-47.6	31.8	69.4	26.1	2.9	30.5	60.8	2.2	41.4	59.1	67.8	-0.6	15.5	7.7	57.7
492	-5.6	93.6	53.8	57.4	-42	32.3	-92.6	26.9	0.4	102.5	139.8	58.5	80.2	34.9	7.4	29.9	26.6	37.1	63.8	60.8	9.1	-16.8	12	33.6	123.4	-44	102.4	52.5	-69.2	-128.8	29.1	-59.5	-8.9	-50.7	-186.7	41.6	25	22.8	28.3	-2.5	23.1	-14.3	-40.5	65.8	112	-5.5	1.1	-8.7	38.7
493	94.6	93.7	83.4	118.7	93.4	91.2	84.6	66.6	89.8	79.5	130.2	122.1	47.6	86.3	37.8	53.8	113.2	64.3	94.6	107.7	50.9	59.3	123.2	113	98.5	50.1	81.3	64.3	54.3	92.9	70.7	101.4	100.4	70.2	-70.7	15.7	127.3	123.1	55.3	57.8	-46.4	114.7	44.1	78.8	110.3	54.6	-27.6	102.2	87.6
494	-62.3	4.7	-27.4	-20	-48.8	-0.7	-183.7	-38.6	18.6	-39.2	16.1	-35.8	-0.8	-66.7	-5.2	-11.2	8.8	32.5	-4.8	30.8	5.7	-1.9	31.1	31.4	-163.3	-60.1	-0.6	-53	33	-205.9	-27.1	-44.2	3.6	-79.3	-44.4	37.1	-95.4	-59.4	-62.8	-73	-24.1	-190.1	-68.3	21.8	-25.3	-45.6	56.8	-71.4	33.1
495	35	10.3	68.9	35.9	33.6	31.6	53	31.3	14.4	19.2	22.9	20.2	35.1	46.6	75.5	24.4	16.1	21.2	25	8.8	56.4	17.6	49.6	47.4	26.7	64.8	18.3	59.8	48.6	8.5	48.6	41.4	75.4	52.5	95.5	81.7	66.4	84.9	27.1	45.8	30.3	21.1	46.3	64.4	61.9	27.6	52.7	40.7	12.8
496	88.9	64.1	39.5	28.4	73.8	65.5	94	38.5	64.7	61.2	40.2	51.3	57.7	53.5	54	9.6	39.1	27	43	31	64.7	29.3	52.6	56	-18.1	112.8	27.1	49.2	98.5	71.2	32.3	60.8	50.8	95.5	33	60.7	50.5	72.3	105.7	33.3	72.1	33.9	69.3	39.5	94.2	36.8	88.3	37.6	50.9
497	112.3	122.6	68.9	80.7	80.2	35.2	82.6	75.2	89.6	78.7	99.6	55.1	61.7	100.6	61.6	101.4	45.8	64.3	127.5	152.2	103.9	80.8	81.8	99.9	40.2	89.4	82.6	75.8	131.8	29.6	77.7	120.5	157.8	108.9	69.4	85.8	17.6	88	119.9	120.7	87.7	45	96.5	95	137.6	58.1	181	74.5	89.3
498	193.6	161.8	78.9	106.6	105.4	111.8	142.6	93.8	43.5	89.7	89.5	74.6	125.1	103.1	135.2	87.5	58.5	101.5	108.4	200	125.5	90.3	97	160.6	110.5	140.3	140.4	77.7	66	68.4	146.9	141.4	79.8	146.5	125.7	157.1	49.6	175.3	128.8	100.8	160.4	64.7	116.8	79.5	131.6	97.1	98.3	79.1	92.3
499	161.3	170.5	93.2	-6.8	2.7	9.6	127.7	64.3	109.5	115.5	101.9	118.8	76.1	17	93	36.4	137.4	40	64.7	44.3	106.8	19.3	155.2	54.1	107.2	-2.1	53.2	133.9	4.3	-168.9	103.2	5	39.6	119.8	148	122.9	11	32.2	92.8	57.5	120.9	26.3	138.2	79.1	221.4	22.7	103.8	78.5	90.7
500	57.9	23.5	39.2	33.4	64.3	84.8	3.6	20.7	10.1	14	73.2	31.9	-2.6	29.6	21.3	31.7	64.9	56.9	48.2	13.9	17	16.5	13.5	36	124.6	-41.9	54	62.8	-19	-87	35.3	-1.1	-10.6	-27.7	-46.7	18.3	47.1	91.8	107	86.8	54.9	-29.7	5.4	18.9	111.4	34.8	51.3	23.1	34.9
501	211.6	107.6	29.4	56.7	-65.1	224.4	195	82.7	143.9	69.4	-2	66.4	66.3	107.8	50.9	106.4	-8.6	18.4	72.5	64.5	124.2	91.2	79.2	89.8	23.5	-240.4	100.9	124.6	228.5	172.8	164.2	181.8	109.7	181.8	210.4	164.1	216.1	10.5	25.4	135.2	37.5	159.6	137.2	64.2	165.9	92.7	46.5	65.8	85.3
502	138	217.7	-15.5	56.6	189.9	174.9	173.5	119.2	20.9	104	-13.1	178	44	16.3	10.2	61.8	95.2	129.1	49	-1.7	130.3	27	156.3	60	65.4	123.6	190	92.7	229	74.2	191.9	154.8	88.7	43.9	106.3	45.1	171.6	85.6	-14.6	180.2	48.1	11.3	219.3	53.9	55.1	95.2	125.6	194.6	69.9
503	143.1	16.6	46.1	70.6	43.1	-1.2	49.4	44.8	82.2	-60.8	81.3	77	95	115.7	7.7	30.6	-18.2	-34.5	80.8	9.9	50.5	-8.4	52.9	51	237.3	54.5	92.7	59.5	45.1	76.2	152.4	36.7	166.5	139.8	204.9	-3.5	-3.1	-44.3	-72	151.8	97	37.2	152.1	125.2	48.3	-122.2	12.3	-124.7	76.2
504	504.8	2272.1	1436.8	1542.7	710.6	1336.9	807.2	1437.6	967.9	1053.4	1328.4	807.8	771.8	1277	819.6	1955.3	923.6	2031.9	1585.9	1255.9	820.5	718.6	1126	907.9	635.8	1498.5	893.7	1128.7	693.2	913	778.8	691	568	1121.9	492	2165.1	1374.2	1685	655.2	1120.4	842.8	1385.5	969.5	832.3	1733	2704.8	1131.1	1011.3	776.1
505	240	428.1	873.7	370.2	226	197.9	169.6	449	446.9	163.6	365.7	240.3	470.2	456.7	322.2	669.2	29.2	386.6	212.5	190.4	450.7	511.3	545.4	303	1544.8	939.3	322.5	858.2	700.5	599.5	391.2	396.1	419.3	1047.2	353	432.4	285.6	415.6	645.2	324.6	1042.6	90.6	408.2	1081.7	713.3	815.7	436.5	145.7	528.2
506	211.3	723.2	387.3	356.9	258.4	179.4	69.6	116	333.2	183.2	416.1	170.8	279.2	275.1	174.7	129.8	750.9	209.5	185.9	226.7	227.2	242.5	398.3	213.7	610.2	165.5	170.6	248	179.1	182.9	79.7	368.1	231.2	144.7	222	322.6	125.4	198.4	129.9	99.5	263.2	149.4	121.3	208.1	155.8	201.1	268.8	139.7	133.7
507	123.3	220.6	68.1	66.4	121.1	71	174.9	57.2	125.8	75.2	120.3	118.7	86.1	95.9	100.3	62.9	117.8	61.3	55.6	31.9	99.7	91.9	116.5	61	188.1	130.9	120.1	133.3	316	228.5	129	154.7	123.2	183.5	173	63.3	88.8	101	110	68.2	77.5	177.7	86.6	75.1	111.3	99	90.5	89.9	64.6
508	24.8	26.8	40	72.8	89.1	10.4	61.6	44.7	66.4	28.9	43.6	16.2	43.3	16.2	51.2	59.7	100.9	52.9	35.4	49.7	24	60.9	17.4	18.8	5.2	96.2	16.7	96.3	-57.5	-48.7	16	23.8	59.2	-4.4	69.8	67.7	45.5	47.1	42.9	38.9	109.3	82	-14.3	35.4	76.3	61.9	108.6	22	42.1
509	745.2	1050.6	1100.9	639.4	719.8	907.6	493.2	443.8	710	540.9	952	910.4	665.5	821.5	524.3	1671.5	1261.2	403	1348	615.2	545.4	771.7	514.7	665.8	917.9	895.5	661.5	820.1	670.7	564.8	648.3	806.1	749.3	503.8	634.5	502.1	1229.1	560.4	549.1	386.4	912.9	881	709.8	560.8	462.2	1020.4	873.7	655.8	451.6
510	512.4	435.3	306.7	493.7	70.6	386.2	152.7	95	181.8	98.9	482.8	223.2	102	220	198.9	415.7	293.3	457.3	186.1	368.5	82.8	179.3	87.4	128.6	105.6	183.7	247.8	276.6	334.1	575.3	242.6	269.6	158.3	175.8	293.3	280.8	320.6	286.7	385.3	108.1	216.9	121	177.1	110.8	568	290.5	753.1	76	254.9
511	-241.7	-43.8	-115.2	-86.3	-153.1	-122.5	-245.8	-74.3	-147.9	-118.1	-85.6	-154.1	-87.1	-121.4	-107.6	-26	-160	-63.6	-49.3	-46.5	-97.1	-74.9	-85.2	-66.9	-177	-156.7	-97.9	-113.5	-133.8	-230.5	-102.3	-150.2	-109.3	-213.5	-69.2	-162.9	-155.5	-160.4	-244.3	-135.1	-144.8	-144.6	-199.7	-90.4	-126.1	-91	-83.6	15.7	-68.5
512	39.2	60.9	29.7	58.8	41.6	-21.3	37.8	36.7	71.2	59.2	33	91.4	25.7	63.6	17.4	-0.6	32	64.2	30.6	26.5	25.3	32.8	27.7	38.3	27.3	95.4	21.7	85.9	50.2	166	85.6	28.5	50	45.2	78.7	80.4	131.1	45.4	146	68.3	61	114.2	10.7	45.8	96.7	49.4	44.7	73	58.3
513	155.2	45.6	93.7	69.9	34.8	22.7	77.1	43.7	168.9	109.5	41	66.2	46.3	64.7	75	40.4	164.9	11	31.4	21	106	60.6	89	69.8	110.2	82.6	72.7	98.8	60.5	409.2	138.3	55.5	57.6	63.7	176.4	33.3	-17.3	108.9	1.3	23.6	81.6	109.1	245.7	37.1	69.6	57.3	34.9	119.5	55.2
514	74.7	30.2	44.4	14.5	122.9	21.4	50.3	18.9	15.4	30.2	36.5	59.1	26.1	18.5	12.8	15.7	25.5	48.7	12.8	7.2	19.6	21.7	38.4	25.2	32.7	64.4	59	83.8	-37.7	6.2	37	47.3	60.4	43.1	122.6	20.1	64.6	29.5	73.6	90.4	52	37.9	82	31	55.7	53.8	8.4	23.4	24.1
515	50.2	208.1	220.9	-73.3	-7	-50.8	152	26.3	-20.7	87.3	73.5	-33.7	54.7	-4.7	-22.7	61.6	265.7	86.5	17.2	3.5	-151.6	68.5	14	42.8	123.3	430.6	-22.9	-2.4	-289.2	-11.4	67.5	-10.9	-35.3	74.3	-145.1	44.7	-21.2	106.6	105.6	-48.3	48.1	-133	152.3	62.2	71	155.4	33.1	22.2	-6.1
516	23.9	1.4	26.9	13.8	49	15.9	0.6	16.9	1.3	1.1	-19.5	-11.4	2.3	8	2.1	6.4	26	18.5	-7.8	0.9	0.5	-7.7	4.8	18	64.4	66	-10.5	10.8	4.5	103.2	25.3	23.5	-27.4	34.7	88.3	8.7	36.9	29.6	18.6	24.9	27	-18.2	13.9	36.5	11.6	12.6	4.8	-2	7.9
517	225.1	397.8	384.3	393.9	74	348.8	41.1	123.4	165.9	423.2	271.1	212.8	442.9	503	269.9	362.2	629.3	535.2	318.8	341.7	333.7	365.7	154.6	325.1	414.6	132.6	140.9	382.8	374.7	122.6	216.7	275.8	281.9	337.4	-12.8	466.8	301.5	426.8	578	239.7	430.5	179.1	207.6	316.6	427.8	378.5	577.6	253.7	380.5
518	202.2	229.3	137.7	129.8	163.9	164.6	174	147.1	155.5	183.1	216.9	163.4	173.6	137.2	161.1	97	126.5	148.8	161.7	141.8	175.2	179.8	186.5	235.8	175.4	96.6	170.4	145.6	193.5	243.8	202.1	191.9	184.2	236.9	173.9	156.5	177.9	188.6	302.8	175.6	172.1	177.9	208.2	177.8	210.5	177	184.4	147.2	127.5
519	368.5	104.3	172.7	175.3	326.8	239.2	291.9	280	22.3	212.8	203.8	462	283.2	201.4	264.2	719.3	60.8	167.1	187.9	545.7	209.6	739.6	145.9	298.1	131	103.9	284.5	318.9	404.3	393	143.8	217.9	212.9	130.7	128.5	184.4	237.9	126.7	216.9	612.1	223.6	401.1	175.4	271.1	142.4	255.5	306	144.8	156.1
520	4	491.3	212.4	265.3	64.5	265.6	129.3	133.1	242.7	25.2	319.3	170.4	166.3	132.4	191.8	150.2	270.9	171.3	125	207.1	131	174.1	186.2	230.3	77.9	313.6	117.4	128.6	30.8	272.2	113.2	192.9	189.5	175.9	100.4	61	226.9	294.4	314.5	102.7	340.2	199.6	2.8	195.1	142.5	-26.3	455.3	10.1	260
521	87.9	97.6	62.3	46	80.2	43	145.3	34.1	55.3	16.9	30.1	58.9	92	47.3	60.2	43	44.1	16	39.7	65.6	66.6	25.4	38.4	98.1	62.7	117.8	18.4	80.7	7.3	103.1	76.6	76.7	65.5	61	111.9	72.5	102.4	37.9	9.9	65.3	52.8	89.7	42.8	57.8	22.6	21.8	65.4	36.2	52
522	171.1	106.4	195.2	157.8	205.1	117.6	301	121.2	260.9	145.8	204.5	188.2	257.4	165	184.7	119.3	199.6	128.7	130.6	176.8	118.6	77.5	126	150.4	281.3	83.8	127.2	178.2	221.4	341.5	182.5	181.8	236	232.2	312.9	201.4	276.9	239.7	436.5	489	267.3	228.2	161.9	200.9	178.8	233.1	168.1	123.2	138.1
523	-81.8	-12.5	-4.7	-42.4	21.3	-33.4	-111.2	-10.8	10.1	-33.7	-34.2	-20.5	20.8	-10.2	-6.4	-55.9	-25.3	-18.7	-37.6	-4.4	-53.6	21	7.1	29.6	-62	-37.8	-14.4	-33.7	-18.5	-55.7	11.5	-5	-11	2.7	-64.8	-44.7	-92.1	-16.9	-48.1	20.7	-64.4	-47.1	-3.1	-24.3	4.9	-67.1	-36.2	-44.6	-19.7
524	1.7	12.6	22.7	16.3	16.7	-0.4	49.1	37	-33.9	22.7	39.5	21.6	21	15.8	37.7	0.9	13.7	56	25.8	14	25.2	6	30	23.2	21	48.6	9.1	33.9	76.5	27.2	26.4	43.2	24.5	36.2	24	35.3	11.8	29.9	45.3	26	40.1	73.2	75.7	17.5	13.1	53	-6.7	50.9	24
525	-181.2	-198.6	-77.4	-42.4	-98.2	-182.8	-113	-63.4	-374.9	-69.5	-195	-201.6	-220.9	-191	-102.2	-48.2	-153.7	-134.1	-121.4	-17.6	-116.8	-135.6	-163.6	-141.8	-345.4	-321.7	-158.5	-172.6	-272.7	-431.3	-158.8	-268.2	-180.3	-230.9	-388.2	-32.3	-340	-155	-277	-81.4	-220.9	-344.3	-185.6	-118.4	-101.6	-163.8	-111.8	-282.4	-139
526	142.5	167.1	104.1	114.1	148.4	146	175.4	135.1	206.4	126.6	127.3	88.3	102.4	168.3	153.4	71.1	123	140.7	101.2	64.8	55.7	73.2	86.4	86.1	278.8	230.2	147.6	73.9	277.8	266	164.9	142	223.4	210.9	293.5	93.8	190.1	184.6	242.1	147.7	28.3	234	214.8	125.1	156.3	184.6	129.6	27.9	111.9
527	591.1	458.9	579.7	241.8	326.2	514	189.6	363	399.9	258.8	245	391.7	155.7	303.6	549.9	302.5	251.6	567.4	603.1	261.1	325.2	318.6	260.3	248	467.6	398.4	308.3	599.1	443.7	115.6	275.3	239.1	227.4	524.9	147.4	330.8	376.5	288.4	172.8	496.7	370.9	1104.8	186.7	293.3	559.8	194.6	372.6	175.2	327.9
528	182.3	130.7	25.1	151.8	30	-146.5	135	159.8	58	-26.1	208.3	-67.1	119.6	59	156.5	51.6	436.5	-61.2	6.8	-11.5	-36.7	97.6	-119	-26.5	-91.6	-22.4	161.8	7.6	39.3	181.3	68.5	157.1	-11	11	172.4	1.5	-385.8	110.3	157.8	32.4	178	-96.3	117.5	193.5	255.7	241.6	131.2	172.7	-55.6
529	173.3	123.8	121.2	92.9	147.8	118.1	117.5	114.1	146	54.7	95	65.5	93.4	145.9	108.8	187.5	92.7	87.1	116.6	88.3	152.3	108.3	122.3	126.9	99.4	167	138.3	115.6	139.5	181.2	123.9	123.5	141.4	145.7	193.4	143.8	133	139.6	120	99.7	150.9	123.3	196.3	187.7	190.1	204.9	134	110.4	74.4
530	-13.5	28.7	31.1	5.1	-10.1	22.6	5.4	0.1	35.5	-20.9	-4.4	6.3	-20.9	15.9	-8.2	11.7	33.5	-1.7	-2	12.5	-50.7	22.5	26.9	6	172.1	-10.8	12.8	-11.4	72.8	98.2	16.4	-3.2	-3.9	6.7	-0.6	39.5	53.7	23.1	-2.2	6.3	33.6	75	1.4	-3	100.7	105	9.7	-26.5	-1.9
531	222.1	129.3	198	77.5	180.8	110.2	165	108.3	142.6	105.6	174.3	150.3	45.8	151.8	60.9	75.4	103.4	162.2	67.1	44.3	116.6	134.5	84.2	79.7	163.7	210.1	82.6	120.3	193.5	288.2	121.9	188	110.9	169.4	300.3	89	181.2	140	185.3	140.2	141.8	80.1	149.6	84.6	181.3	188.6	158.1	119.7	104
532	1467.3	1886	629.1	565.2	1286.9	724.9	929.8	630.6	411.9	648.6	1025.1	970.1	1013.9	826.2	456.5	1469.5	1241.5	529.9	1216.8	1592.6	1253.5	1618.8	697.5	1195.2	493.2	654.2	1139.4	1139.7	900.4	833.1	1578.6	898	1009.4	1022.8	1201.2	1161.1	759.7	1136.3	529.5	463.1	764.7	633.7	758.2	1095.9	605.5	688.2	1081.8	559.9	614.8
533	193	193.9	151.8	131.4	115.9	180.3	164.1	132.2	228.3	53.4	121.4	124.9	136.3	200.4	125	111.5	80.3	132.7	128.3	125.4	129.6	131	98.2	127.1	139.5	167.2	188.7	140.5	227.7	204.3	208.4	139.4	195.7	152.1	128.1	250	190.9	198.9	167	218.7	225.8	128.3	233.8	140.8	211.7	203.6	229.3	139	176.8
534	247.9	222.8	221.7	172.3	114.8	246.8	98.5	177.8	268.5	112.4	225	128.4	209.6	162.7	183.1	100.7	221.3	162.2	129.1	108.9	159	224.3	208.3	165.6	253.9	243.1	220.1	147.8	200.3	209.2	154.9	118.2	131.5	145.7	131.7	197.8	239	269.1	308.2	115.5	147.6	144.1	118.9	216	190	129.5	177.8	125.3	105.1
535	97	51	88.4	102.4	100.2	73.5	84.4	95	122.8	129.9	209.1	233.9	127.4	94.3	68.4	83.4	129.2	123.7	107	67.2	88.3	76.3	75.5	106	168.5	131.4	102.4	112.1	104.6	167.2	144.6	87.7	50.2	71.1	195.7	87.7	86.8	108.4	238.1	151.6	84.1	189.3	59.8	99.9	118.8	104.1	138.2	199.7	146.2
536	426.5	341.5	485	307.2	463.6	382.9	225.9	279.9	242.1	251.2	282.2	152.7	455.8	441.1	364.3	588.6	353.8	211.6	378.9	373.1	548.3	589.3	350.1	491	445.6	667	297.8	361.3	315.3	344.9	479.4	389.2	274.7	403.3	519.8	623.1	261.5	333.4	742.9	505.1	394.6	489	431.3	436.4	268.3	417.1	317.2	272.5	277.6
537	129.9	171.9	161.9	110.1	162.4	130.4	122.5	122.5	196.9	122.5	136.9	160.6	135.4	132.1	91.2	59.7	161.7	127.6	111.8	99.5	82.2	91.7	105.2	89.6	146.2	150.8	104.9	122.7	143.1	213	126.5	152.9	175.8	153.7	224.9	151	138.9	179.8	196.2	118.3	185.2	117	162.8	153.7	175	137.1	190.6	158.2	148.4
538	26.2	68.8	53.5	33.4	23.8	-12.3	-44.2	26.5	94.9	39.8	6.6	8.8	72	40.2	29.4	20	239.1	80.7	29.3	33	-1.2	18.4	30.9	67.5	-56.8	83.5	17.3	28.8	21.4	-12.8	57.7	49.2	54.5	68.4	138.3	32.1	50.8	3	55.9	3	89.9	-37	8.2	31.5	182.9	26.4	-15.4	17.4	40.3
539	214.3	317.2	287.4	164.6	157.4	125.6	107.2	111.8	102.3	82.2	145.2	111.9	220.9	197.9	108.4	218.4	156.6	208.7	248.4	238.2	146.9	168.4	173.2	143.8	168.7	162.4	124.4	140.7	97.4	116.1	117.2	215.6	71.6	136.5	245.7	599.7	171.8	171.6	193.1	140.3	325.5	116.5	135.3	250.1	262.2	131.4	316.2	80.2	90.5
540	173.1	171.1	289.9	253.1	183.1	145.5	177.5	175.8	111.6	169.5	207.2	278	203	186.4	198.9	74	55.7	329	493.6	293	152.1	163.3	203.5	165.3	244.2	89.1	195.9	255.9	219	97.7	170.4	291.8	160.1	168.5	153.2	287.5	248.5	234.6	31.6	29.7	211.4	168.2	184	133.8	191.4	309.5	197.4	123.1	400.5
541	206.2	156.1	77.9	190.8	205.2	-17.9	120.4	119.1	33.9	312.8	87.6	149.4	185.2	18.2	214.2	98.8	426.5	16.1	37.6	24.9	214.7	214.5	126.9	134.9	227.7	37.8	119.6	129.3	64.4	66.1	126	32.5	77.4	100.4	313.3	201.8	72.4	94	34.8	73.7	72.7	158.2	78.4	140.6	65.1	124.9	153.6	41.9	137.6
542	214.9	198.8	208.3	190.7	109	56.3	237.1	78.8	128.5	48.6	117.9	236.6	217.5	174.1	170.3	117.4	96.1	136.6	116.6	125	167.9	154	148.3	141.6	173.8	111.4	142.5	112.9	112.9	284.4	156.5	161.6	230.8	232.3	219.7	198.5	220.6	71.4	226.2	128.7	158.9	155.3	173.9	162.1	119	140.7	112.5	105.8	147.6
543	302.5	574.4	380.4	533.4	55.4	320.2	122.9	69.1	380.8	183.1	-5.3	101.6	452.4	320.5	228.6	167.3	761	253.8	544.6	279.1	271	163.8	320.3	281.2	394.2	49.9	225.2	219	38	139.5	214.2	289.8	423.1	254.2	119.5	467	174.4	81.9	526.6	467	398.9	147.1	135.5	65.8	737.7	17.7	651.7	125.5	430.5
544	306.9	280.7	294.5	268.9	256.5	300	310.2	244	326.3	275.3	255.8	252	199.3	359.2	232	188.4	542.7	213.5	192.5	182.4	278.6	257.1	301.1	235.2	207.7	408.1	253.5	281.6	373	433	225.9	302.2	336.5	318	359.1	207.4	247.2	254	265.4	230.8	279.1	336.1	283.5	203.8	278	266.6	226.2	243.7	236.7
545	39	41.1	86.8	78.8	55.5	66.1	38.9	56.5	114.4	24.4	39.3	40.9	63.9	60.9	96	189.9	37.3	39.2	33	101.7	63.8	47.3	56.4	54	80.9	67.1	26.3	86.8	71.4	82.9	104.4	63.3	101.7	100.5	125.5	73.8	102.1	56.8	113.5	65.7	77	105.4	91.4	90.4	132.1	88.5	83	36.8	26.7
546	-26.5	-28.7	-9.2	-14.3	-15.8	-12.2	-25.7	-11.6	-54.1	-12	-29.2	-23.2	-1.7	-21.3	-9.2	-7.7	-4.8	-8.8	-10.8	0	-12.9	-7.5	-13.2	-9.6	-31.5	6.2	-15.7	2.2	-70.3	-89.8	-19.4	-7.6	-24.1	-42.4	-23.5	16.5	-21.3	-1.8	-1.3	10.9	-13.5	-12.3	-11.1	-4.6	9.8	-8.2	-13.4	-22.1	-2.1
547	99.5	63.3	142.9	65.2	50.3	52.7	52.1	53.7	51.5	68.6	27.4	33.7	224.9	92.6	127.6	78.6	42.5	50.9	91.7	67.8	115.7	170.2	97.3	135.2	136.6	111.5	62.5	120.6	95.2	149.4	108.7	59.6	94.6	150.1	181.1	98.8	117.8	93.5	170.9	53.7	184.4	89.9	132.9	148	195.7	162.2	45.4	54.6	62.9
548	-516.6	-32.3	-112.7	-231.4	-338.5	-228.4	-191.5	-194.1	-229.9	-71.4	-128.3	-165.3	-93.4	-297.8	-375.4	-63.5	-139.1	-157.5	-91.2	-74	-149.7	-76.8	-221.6	-64.7	-134.9	-216.4	-293.9	-81.4	-500.5	-466.4	-166.5	-293.6	-339.1	-192.7	-446.1	-158.2	-191.4	-242.1	-244.3	-289.6	-316.2	-8.9	-182.5	-73.5	-105.5	-292.9	-210.7	-178.1	-109
549	122	112.2	51.3	47.3	113.6	10.2	35.7	50.2	17	-2.7	34.4	9.2	192.6	38.9	5.2	23	104.1	95.5	7.3	1.7	24.8	93.1	59.2	46.9	77	31.4	8.8	9.4	67.5	-47.1	-0.4	46.8	52.5	33.5	34.5	50.6	32.2	14.9	133.6	3.2	9	25.7	28.6	57.5	169.8	99.9	10.2	10.3	32.3
550	209.8	348.7	296.7	261.6	143.3	189.4	332.9	344.9	104.6	121.7	282.8	189.5	180.4	296.9	306.5	253.1	168	388.3	432.5	339.5	192.8	164.3	207.7	295.5	144.2	363.7	248.5	189.6	201.8	82.1	160.4	498.1	270.7	197.8	256.6	379.4	407.9	412.9	342.4	283.2	387.2	130.8	160.4	268.2	245.6	462.5	313.4	141.3	365.9
551	1085.5	72.5	497.4	480.7	1165.2	684	692.2	757.8	138.9	814.5	260.2	418.3	524.1	373.6	-21.4	1037.2	-53.1	497.7	139.5	856.7	700.3	1123.4	712.9	228	463.2	268.2	403.6	1209.6	1898.4	932.9	557.8	966.6	527.1	202.3	266.2	877.8	741.5	394.3	107.3	1971.6	330.8	649.5	1402.6	233.3	191.3	689.2	140.5	500.7	375.4
552	591.9	426.2	270.6	298.2	288	142.4	476.3	240.6	121.6	325.6	347.1	472.6	272	335.4	292.6	92.4	289.2	211.8	161.9	137.8	289.8	111.1	337.8	216.4	250.4	181.6	282	167.6	475.1	261.8	296.3	334.5	412.6	471.6	512	197	420.1	133	167.2	182.1	205.6	430.8	373.3	122.5	122.3	176.7	132	372.3	313.6
553	131.5	75.4	87.4	49.9	90.1	82.2	122.3	61.1	72.1	67.1	85.4	102	202.4	146.4	152.4	54.1	68.2	46.8	75.1	38.4	249.5	97.2	62.5	220.3	67.2	63.5	180.9	98	65.6	101.6	177.1	142.5	170.2	247.2	66.4	77.3	38.8	47.2	90.2	39	85.3	77.9	141	108.8	96.8	59	52.1	101.2	60.4
554	430	186.1	706.2	476.3	380	392.5	685.3	172.5	836.1	533.1	142.7	244	438.2	359.9	417.6	1262.1	167.3	483.6	331.9	162.9	189.1	2090.9	109.3	159.1	1560.4	369.8	174.3	390.3	301.3	606	135.9	244.7	-2.2	764.4	526.2	965.4	89.7	339.1	721.8	851.6	1351	689.5	113.4	217.9	1412.4	728.6	759.8	121.9	59.7
555	530.7	327.6	111.8	365.5	267.2	553.9	247.4	369.3	659.7	267.3	364.1	302.7	291	449.8	328.9	242.6	596.5	243.8	591.1	330.7	391.9	242.5	274.9	360.7	330.7	798	337.7	388.1	352.2	503.9	335.5	516.5	498.9	514.3	467.5	356.1	432	832.3	879.7	452.6	558.5	284	482.1	306.2	799.3	232.3	334.9	512.6	425.7
556	470.3	775.4	820.7	632.4	604.5	812.5	351.6	387.6	323	471	605.6	566.9	464	756.7	391.4	415.8	800.4	836.2	402.5	263	397.3	436.4	391.2	391.6	466.9	847.5	492.8	529.1	716.5	739.2	571.8	554.6	543.3	606.5	479.1	381.7	452.9	449.4	603.9	457.9	530.5	934.1	311.3	362.3	420.5	892.3	764.2	592.3	610.6
557	-2.5	-27.6	16.2	14.2	31	12.3	14.8	-27.6	-59.1	0.5	3	-20.4	32	22.6	-2	2.4	25.1	1.9	1.1	8.3	-21.1	0.1	19.6	17.7	-56.8	-31.1	7.9	20.7	-20.9	25.7	-19	-11.5	-36	-7.8	-7.1	20.8	-7.9	-24.3	-2.2	3.4	11.7	-10.5	26.5	27.8	10.6	-15.7	27.4	-6.2	14.3
558	-12.6	-2.9	10.5	-6.1	18.4	7.8	23.5	-3.6	4.9	7.8	-1.3	20.2	2.2	-1.6	6.5	-11.3	-6.4	6.1	7.3	-2.5	19	-4.1	13.2	3.1	-0.8	4.4	-3.2	6	-11.2	-58.9	-3.8	14.9	7.2	6.1	-56.9	-7	-9	0.1	12.8	13.9	-7.4	-3.6	-9.7	-6.4	-1.3	19	1.3	30.1	2
559	99.1	171.4	85.1	258.2	39.6	114	90.9	149.1	232.9	54.3	36.5	50.9	136.6	148.7	138.8	325	77	120.5	164.8	196.6	113	134.3	65.8	130.9	136	100.3	137.6	139.7	174.6	129.1	115.2	161.8	162.4	151.4	19.5	201.5	149.8	196.8	160.7	147.9	212.2	104.5	102.6	182	55	395.4	211.5	54	37
560	3	0.7	-2.5	0.7	-27.5	-18.2	3.1	10.4	7.2	23.5	17.6	-1.8	-9.6	-4.5	-17.5	1.9	-6.3	-3.5	12.4	6.2	4.9	-9.1	-11.8	2	-48.7	-14.8	-5.4	-13.1	2.9	-14.5	5	-0.8	-14.7	5.7	-41.3	-21.6	-54.3	2.7	10.7	1.6	0.1	2.3	-17.5	10.6	-22	16.9	-2.9	6.8	2.9
561	25.2	14.2	-5.5	-4.3	8.1	-1.6	-14.4	-0.1	-13.8	-4.5	-8	-30.2	17.7	18.5	15.3	-9.3	-10.4	-6.2	0.4	4.8	-12.1	-5.4	15.1	10	-5.3	30.2	-0.1	-24.1	18.1	79.2	-3.5	16.8	16.9	-1.7	32.2	17.1	3.4	3.5	-12.4	12.4	1.4	6.5	7.1	15.2	-4.1	5.4	-0.4	-47.9	13
562	64.8	184.4	88.6	148.6	88	115.5	118	65.1	23.1	75.8	304.6	33.3	105.2	64	144.5	128.2	229.8	102.3	79.7	98.7	161.8	126.8	98.8	103.3	44.1	43.2	71.8	76.8	73.6	-38.4	35.9	147.1	90.7	74.5	34.9	129.8	-67.9	13.9	-36.6	64.2	35.2	-70.2	30.2	88.2	37.6	71.6	146.6	75.8	42.6
563	1956.5	4099.3	3273	3277.9	2817.4	3646.1	2509.4	2180.9	3031.6	2475	2932.3	1732.3	3493.8	3173	1918.1	3126	2939.1	2316.2	2311.9	2016.4	3035.3	3005.8	2296.3	3492.2	3376.5	8982.5	2788	4386.7	3369.3	1320.1	1888.4	3245.6	2321.3	3281.3	1924.7	3330.4	1787.3	2864	3673.9	2230.6	3688.4	4510.3	1653.9	3706.7	3466.5	2798.1	1518.9	1906.3	2546.3
564	68.5	42.1	33.8	28.4	67.3	29.1	36.3	25.2	103.3	24.7	34.6	32	24.4	28.8	12.7	55.8	49.7	45.1	56.6	9	29.2	21.1	21.1	27	105.7	18.7	43.2	47	78.4	50.1	53.9	45	25.3	62	110.8	81.7	140.7	39.6	98.9	86	61	30.3	67.6	48.9	53.8	45.5	60	53.7	66.1
565	-57	-43.6	12.8	11.1	-32.3	-17.7	-19.5	5.8	5.3	3.4	-15.3	-15.9	-0.7	-7.7	-4.7	2.7	-13.9	25.6	31.4	49.8	7.9	-20.1	9.7	-7.7	-54	-1.9	-0.6	-4.6	-55.1	34	-21.3	-2.4	-25.1	-18	-70.5	-5	23.8	-3.5	-37.3	17.2	5.5	14.9	-22.6	5.7	29.5	24.9	-3.3	-26.7	9.9
566	-47.3	80.1	149	74	-22.3	90.6	0.3	48.3	141.7	62.2	62.1	35.6	-1.9	80.5	15.1	24.9	101.6	49.1	172.1	59.9	11.4	5.6	58	37.9	210.9	38.5	-8.1	54	40.1	77.8	25.9	76.2	77	76	54.8	77.4	61.4	78.1	135.4	113	129.7	9	17.8	66.4	69.3	62.3	49.8	-30.3	64.3
567	30.2	51.4	189.5	163.1	110.5	76.5	153.7	91.9	303.8	221.3	210	31.1	149.2	171.5	98.3	65.2	181.9	136.3	80	44.5	134.2	143.6	302.5	53.7	240.5	391.6	90.1	101.3	81.2	48.4	272.6	191.2	78.1	44.8	469.8	156.4	64.4	561.6	174.2	69.8	110.2	138.2	147.1	55.1	100.2	105.4	86.7	100.7	115.9
568	2974.4	4790	3865.6	3581.6	4856.3	3869.3	3605.5	4117.6	14838	7792.4	4779.2	8315.7	4034	4311.4	5523.6	7815.7	6049.9	2212.9	4371.9	5169.6	6005.8	4377.8	7919.1	5528.2	10149	7529	3777	4441.2	3915.1	5108.2	7968.6	3983.2	4996.7	4064.7	11129	4623.4	5325.7	7161.6	7702.5	7568.7	5872.2	3712.9	3273.9	4817	15338	4534.9	8479.6	5229.5	2170.6
569	68.8	58.8	47.3	2.3	-17	2.9	-1.1	9.1	65.8	18.3	-1.8	13.6	8.8	10.6	35.4	24.3	15.5	12.7	24.6	11	36.2	12.9	31.6	35.6	73.6	16.8	8.5	22.6	0.4	-11.7	28.3	12.3	41.4	28.1	47.3	39.4	71.8	24.4	72.7	47.4	23.2	28.1	25.4	18.8	6.9	4	16	11.4	5.5
570	-217.5	167.5	-257.4	-181.1	-103.7	5.7	-414.8	-95.5	-433.6	-191.1	-336	-457.7	-196.6	-230.8	-230.3	-59.8	-159.6	-253.5	-227.5	-118.9	-196.5	-134	-215.9	-167.5	-438.9	-178.4	-165.6	-111.5	-230.8	-678.5	73.4	24.6	-144.1	-397	-668.1	136.7	-575	-215.4	-293.8	-311.1	-142.3	-325	-138.5	-188.3	-236	-374.7	-203.3	-460.5	-199.9
571	218.3	339	228.5	268.5	325.7	223.2	242.4	184.2	329.4	182.5	220.4	181.6	344.3	208.4	336.5	177	223.1	246.6	357.2	336.2	328.7	260.7	250	364.6	189.9	269.3	268	192.7	221.9	269.3	353.7	290	314	330.7	238.1	363.7	296.9	320.2	518.8	297.5	413.2	117.3	256.4	303.8	399.3	177.1	404	189.8	194.3
572	-104.6	-161.3	-110.3	-96.2	-119.4	-121.5	-259.3	-127.4	-113.2	-42.3	-152.1	-198.4	-15.7	-163.6	-179	-91.3	-113.5	-150	-164	-113.6	-10.3	-50.3	-82.3	-129.1	-278.1	-199.6	-169.5	-141.7	-234.6	-239.9	-123	-107.6	-268.1	-83.7	-543.6	-129.1	-278.4	-208.6	-83.5	-190.3	-81.4	-177	-148.6	-90.7	-143.4	-81.2	-145	-232.4	-117.1
573	-46.5	82.2	92.9	43.6	23.3	33.4	-57.2	0.2	5.3	6.3	-6	-17.4	128	4	30.1	-5.2	17	17.1	16	46	19.4	38.2	63.2	42	-22.2	22.6	1.2	23.5	-47.6	-103.7	15.2	46.3	-16.4	43.6	49.7	77.5	-2.9	-11.7	-8.2	18.1	60.3	6	-25.7	20.5	15.9	-11.1	32.1	-10	-21.9
574	-17.3	7.9	1.6	-17.6	0.7	-5.5	-25	-1.2	45.8	13.3	-17.3	-15.1	14.2	-14	-5.2	-7.8	-20.6	1.6	-10.1	-4.6	-31.5	19.9	64.4	1.7	-5.3	57.4	-9.1	28.5	-23.5	-31	-32.9	57.2	16.2	-45.4	-63.8	-37.1	-58.8	-17.4	-30.1	13.5	-110.7	-11.1	-11.9	2.2	10.1	-8	19.1	6.2	8
575	-10	20.8	33.8	10.9	33	13.3	-13.8	28.2	-0.2	8.6	-7.9	-21.5	62.5	28.8	-3.4	15.9	5.6	-1	14.8	-7.7	54.2	33.9	2	47.4	-34.9	12.6	6.6	41.3	-21.7	21.8	44.6	1	41.6	64.6	-31.1	3.7	-4	-25.2	5	-25.3	33.4	-10.7	32.4	43.4	34.6	11.4	9.2	16.1	7.9
576	78.1	157.1	179.4	127.3	178.4	88.5	166.4	88	189.8	135.4	95.3	182.9	114	141.6	183.2	57.7	244.4	126.4	90.7	122.4	149.6	149.4	132.3	124.6	206	173.6	95.3	175.2	205.5	187.7	107.6	159.6	156.7	209.9	123.6	148.2	181.6	152.2	150	158.6	185.2	211	150.6	144.8	226.6	102.6	119.3	139.1	99.8
577	105.9	156.5	108.9	96.3	83.5	50	89.1	43.2	74.5	56.8	74.8	68.9	82.8	75.2	52.7	28.3	137	60.3	44.3	75.7	25.4	70.6	69.6	61.7	15	81	53.9	23.8	34.3	204.8	34.1	43.2	50.8	42	152.2	172.6	52.1	106.7	125.4	63.7	87.4	35.9	48.5	92.8	69.9	100.3	102.9	50.1	52.6
578	91.8	112.7	179.9	143.9	90.5	271.4	70.1	153.6	104.3	84.5	131.4	108	163	168	131.9	104.6	62.7	157.1	123.6	128.3	115.3	84.3	51.6	147.3	117.2	80.8	118.5	171.5	202.5	151.3	194.1	129.4	50.2	163.7	39	211.1	71	146.1	159.9	150.8	147.2	79.9	146	206.8	154	86.6	133.3	95.7	88.3
579	556.3	453.3	562.9	258.4	209	168.8	378.9	418.3	567.2	36.5	222.3	224.2	322.8	328.2	435.7	250.3	446.2	653.7	473.1	357	283	132.5	182.3	360.4	345.4	501.6	451	364.1	420	405.6	380.7	491	963.6	325.2	535.3	314.9	530.8	310.5	257.9	483.8	404.2	162.5	355.8	214.1	960.8	111.1	1279.4	286.9	326.5
580	69.2	71.6	93.5	59.7	80.2	102.3	80	76.4	101.7	59	71.8	109.4	17.9	80.2	45.9	7.3	101.8	114.1	44.6	27	24.7	36.8	63.3	31	82.1	123.4	74.2	28.8	-21.3	55.8	31.9	50.6	70.1	51.7	117.5	42.1	113.4	39.4	142.7	64	56.8	31.5	45.2	55.7	25.8	87.9	73.6	115.2	56.1
581	288.6	219.4	229.5	117.6	176.2	173.9	164.3	157.6	231.3	157.6	248.5	186.7	261.1	194.7	182.3	233.8	331.2	118	278.3	274.3	215	220.9	111.1	263.5	221.5	255.1	204.6	194	264.1	291.2	196.1	144.8	245.4	236.3	402.6	207.7	174.4	230.3	170.4	111.6	331.1	208	267.1	347	258.9	223.9	368	259.9	223.5
582	61.2	112.4	99.2	53.8	33.4	37.7	36.2	-7.8	-8.9	11.2	84.3	21.4	29.9	40.7	-5.9	40.8	89.7	82.5	0.6	41.7	43.8	57.6	43	28.4	56.3	60.1	-20.5	48.4	52.6	36.5	46.4	41.6	7.8	37.4	8.1	99.5	3.4	24	112.7	14.6	157.7	75	26.3	59.2	74.2	46	13.6	28.4	-2.1
583	-5.8	-47.6	-23	-78.9	-50.9	-53.5	-115.4	-23.8	2.1	-34.3	5.9	-45	-2.6	-38.6	81.1	-15.7	3	-56.5	-28.6	-0.3	-87.2	-20.4	-59.5	-42.8	-164.2	33.8	-47.8	-90.8	-65	-57.3	-56.7	-40.7	1	42.5	-230.8	0.7	-70.6	-14.2	26.2	3.2	-40.3	-143.5	50.4	13.6	14.9	-39.2	-24.3	-154.2	-19.9
584	153.8	672.3	273.9	204.8	510	437.3	326.8	238.1	230	245.6	486.2	271.6	330.6	328.7	227.9	200.3	121.3	308.2	212.5	304.9	277.1	347.1	328	459.3	313	489.5	373.4	323.9	426.6	537.7	286.4	250.7	351.2	415.4	410.3	242	361.3	375.9	110.7	240.2	215.1	813.3	349.7	300.5	409	422.9	393.3	210.5	203
585	57	78.4	44.8	26.1	148.8	19.1	34.7	25.2	52.6	28.6	8.6	23.3	36.5	37.6	36.5	29.5	79.6	29.3	61.3	44.2	45.6	39.8	37.3	24.5	39.5	64.3	10.1	5.8	27.8	2.7	35.5	10.2	-25.6	18.4	-24.3	103.8	99.7	24.4	28.3	33.8	137.4	33.5	23.3	22.8	73	39.6	132.8	8	26.7
586	512.8	585.1	422.4	606.1	236	465.9	644	446.7	909.5	645.1	494.3	462.9	414.7	591.9	414	265.1	489.4	402.8	452.1	457.8	387.6	343.4	399.2	438.2	298.8	512.4	574.2	468.5	802.4	637.2	408	437	585.3	722.3	682.1	675.4	741.2	737.5	828.9	732.7	548.7	728.9	450.1	438.9	503.7	419.8	704.5	396.4	389
587	-31.6	113.4	97.4	76.6	46.2	77.8	56.9	37.7	59.9	66.3	18	59	74.5	85.2	48.2	15.4	155.2	60.8	85.7	128.7	64	71.3	49.1	65.3	-29.6	123.9	40	65.8	35.1	59	75.5	27.1	38.8	58.9	22	131	95.8	113.1	77.2	88.4	95	11	38.9	65.3	133.2	112.1	92.4	32.2	44.2
588	81.1	80.8	18.7	52.6	74.7	78	118.1	22.3	55.6	75.3	72.9	105	75.6	66.2	57.5	16	98.3	77	57.9	68.2	145.4	102.4	55.7	68.4	170.2	141.1	97.2	79.2	88	129.4	95.9	97.5	59.4	68.5	195.5	68.9	47.5	51.2	46.3	31.3	71.5	151.2	125.5	53.9	94.1	21.6	82.5	48.7	46.3
589	389.8	288.1	301.8	275.8	266.1	169.6	294.3	312.7	82.2	156.1	154.5	428.5	312.2	241.7	338.3	403	244.1	331.5	357.8	584.2	260.9	345.4	307.1	302.9	194.4	182.6	316.8	207.1	268.8	190.3	295.3	265.7	307.5	198.2	171.7	419.9	288.5	190.3	325.6	382.8	280.4	299.9	257	422.9	378.6	258.7	423	161.1	317.4
590	-86.7	53.2	99.4	-0.8	-19	-47.6	-87.2	36.6	103.1	70.6	10.2	-3.9	148.6	15.4	55.2	79.4	95.2	54.6	94.6	99	64.2	138.4	19.5	65.4	93.3	48.4	15	104.4	13.2	-111.7	85.6	30	35.4	25.9	-94.2	117.4	-54.7	119.8	-28.2	101.1	45	20.9	11	104.6	220.2	66.3	95.6	29.7	27.3
591	12.1	117.5	98.9	89.9	169.5	152.7	-99.2	64.5	84.3	31	54.6	-17.8	118.1	93.6	83.3	47.5	83.5	76	55.9	40.8	82.4	90	123	72.1	166.6	182.1	27.2	116.3	133	206.2	135.5	46.8	107.9	113.9	82.1	47.7	87.1	132.2	61.3	83	128.5	84.4	108.7	104.8	98.7	62.3	102.2	79.1	91.1
592	93	136.9	101.7	134.5	76.7	75.4	70.8	29.1	127.9	33.5	58.1	43.4	95.7	132.4	60	45.4	109.1	73.1	54.6	49	67.5	79.9	56.2	60.4	80.7	115.8	36.3	43	48.8	106.1	57.2	113.6	49.8	135.7	148.8	201.9	39.1	86.5	26.1	55.7	178.3	51.9	58.9	48.4	156.7	86.3	104.6	34.5	25.5
593	-1.5	118.1	32.4	30.3	-53.9	29.8	-25.2	4.9	80.8	68	-8.7	-6	61	5.4	113.4	47.4	86.8	36.3	44.3	43.1	1	80.9	-2.9	61.7	76.3	-44.6	45.9	33.7	42.9	-45.2	17.8	14.3	37.4	17.6	-87.2	49.3	6.9	30.9	81	34.6	67.2	123.3	-102.1	68.3	75.3	52.7	82.9	-29.2	45.2
594	116.3	159.3	240.9	21.8	57.6	44.3	29.7	59.2	7.6	20.7	19.6	20.9	14.1	46.7	77.7	56.5	-0.4	269.8	251.5	30.7	57	29.7	28.7	68.6	-33.2	-2.1	57.2	58.3	-9.6	20.6	59.9	55.8	42.9	67	23.7	77.9	64.1	26.4	-22.5	39	52.1	61.2	13.5	113.8	72.3	176.8	133.7	0.4	46.2
595	-77.8	-10.6	-42.6	-31	-31.5	-30.2	-50.1	-38.8	-17.4	-32.4	-77.3	-56	-66.5	-54.7	-60.4	-4.2	-99.6	-30.8	-3.9	-20.1	-44.8	-26.3	-18.3	-23.6	-43.1	9.8	-26.5	-21.3	-56.4	-117.7	-40.2	-53.1	-74.3	-120.2	-152.4	-37.4	-31.3	-61.6	-102.7	-31.7	-48	-62.3	-30.6	-43.4	8.5	-71.3	-32.5	-77.9	-42.6
596	237.7	142.1	208.5	206.6	247.3	229.3	244.5	177.4	218.3	78.2	203.2	69.9	163.6	125.3	231.8	175.5	174	177.4	192.1	161.9	267.5	253.5	141.8	125.1	246.6	200.3	185.3	145.4	289.6	291.5	88.9	247.1	156	146	339.3	145.8	156.4	188.2	247.8	127.5	215.2	261.5	234	202.9	158.9	98.8	267.6	66.8	208.4
597	-19.8	41.8	151.9	154.2	83.8	54.7	5.6	120.1	122.1	-30.1	-22.1	-44.1	102.9	34.7	81.6	164.5	124.4	-0.5	-11	28.5	-9	32.5	0.2	5.9	-42.8	193.3	-0.4	8.5	-6.5	104.4	14.7	71.5	22.3	86	125.2	204.7	18.4	180.9	101.4	33.2	-25.2	-3.9	47.5	99.9	117.3	321.1	20.7	-46.7	-25.7
598	542.1	218.7	156.9	431.8	192.2	207	289.2	252.3	110.1	175.6	170.8	286.9	152.7	183.1	155	581.6	186	58.5	217.3	649.6	196.6	272.6	320.8	120.9	64	12.1	116.5	189.5	282.4	299.2	191.1	241.1	249.9	137.8	350.2	82.9	264.4	175.2	148.4	264.2	158.6	167.7	172.2	89.1	133.4	264.2	181.1	150.6	220.1
599	83.2	95.9	71.6	122.4	127.8	97	152.5	91.1	62.1	48.5	78.6	35.9	39.1	166.2	87.5	64.1	10.2	33.6	73.1	59.3	38.5	98.8	71.6	84.1	148.9	50.3	162.5	164.5	280.9	128.3	78.5	77.1	134.1	104.5	176.4	70.5	88	92.8	144.4	179.5	85.6	61.5	108.8	115.9	150.7	90.3	59.7	63.9	113.2
600	-11.7	60.3	13.5	3	16.9	9.2	-9.5	-12	17.5	-17.7	-5.3	13.4	15.5	8.9	20.1	23.7	-3.4	-31.1	-20.3	14.5	-6.1	2.4	16.1	31.2	37.8	46.5	21.7	-19.3	-13.8	85.2	13.7	-14.8	6.8	-48.6	-0.2	9.8	26.6	27.2	64.5	-6.3	13.6	86	-57.1	15.7	-26.3	-22.6	0.4	-35.4	-19.9
601	-93.2	10.5	-30.9	-29.9	-13.9	-18.5	-85.5	-23.8	-31.1	-9.9	0.9	-12.6	1.9	-37.2	-19.4	1.2	19.2	-18.4	-1	-2	-35.9	-10.2	-33.3	-3.2	-38.6	-38.8	-25	-17.5	-73	-28.5	-23	-15.7	-79.3	-31	-154.4	-1.7	-18	-51.4	-55.8	-16.3	7.1	-48.9	-18	-7.8	-39.7	-25.1	29.9	-28.1	-7.5
602	-0.9	22.5	34.6	24.8	34.6	22.8	38.4	26.9	15.2	9.4	36.5	29.1	18.1	36.6	23.7	10	21.2	34.8	23.6	24.8	23.9	15.8	30.9	12.5	17	-29.9	27.5	28.1	46.8	71.8	38.6	25.2	15.1	44.4	16.5	46.7	28.3	52.1	85.1	49.5	88.3	9.8	9	28.8	56.8	22.9	25.8	30.5	20.2
603	40.5	89	26.4	33.1	30	28.1	39	4.4	30	11.3	-2.3	10.1	14.8	38.2	11.5	16.6	20.6	10.7	18.9	2.8	5	33.7	30.7	11.1	29.8	25.4	27.8	36.4	83.8	132.3	27.1	53.7	43.7	37.9	82.1	43.9	80.2	37.4	65.5	54.8	46.7	31.1	14.8	30.9	31.5	28.9	24.7	16.6	5.3
604	63.9	8.5	39.9	35.5	-53.6	39.3	-74.6	22.6	24.3	-48	-21.8	-33.7	59.7	14	1.7	46.1	-53	-10.3	33.4	-1.3	88.8	13.2	18.1	18.6	142.8	159.8	13.9	15.6	92	7.6	-100.9	-3	49.4	2.4	-28.9	2.2	-55.4	-8.3	-7.3	-1.6	-24	30.7	-25.5	10.3	-0.6	2.7	16.6	-58.2	-29.9
605	98.2	541.4	523.3	309.9	134.1	208.5	352	213.7	283.7	256.1	671.1	148	310.9	359.6	614.1	253.2	779.1	138.7	299.2	357.3	235.5	382.6	199.2	278.2	789.7	409.3	287.5	295.1	208.3	293.8	212.2	316.5	163.8	416.7	540.5	254.4	101.8	329.2	198.5	219.3	544.5	295.3	152.7	303.6	373.4	367.9	263.3	122.1	234.6
606	85.5	130.4	155	74.5	70.2	113.8	51.2	75.3	173.2	34.7	62.7	85.6	150.9	152.8	136.1	112.7	89	187.4	134	97.1	81.5	70.2	85.8	110.9	102.9	223.7	58.4	128.8	92.8	165.7	96.3	156.9	69.4	194.5	95.4	226.7	31.7	101.5	182.8	70.2	297.2	62.6	94.8	122	334.5	79.8	163.7	72	69.4
607	227.9	91.3	109.1	64.5	154.7	94.4	152.8	121.7	202.1	99.2	123.3	88.1	126.2	122.1	89.7	48.6	91.7	69.2	55.1	49.3	132.9	123	74.3	94.4	222.6	270.5	86.1	88.6	236.7	255.3	165	150.9	112.9	195.1	225.8	81.3	125	104.5	225.6	124	96	155.9	195.8	98.9	151.5	79.4	91.5	124.6	91.7
608	127.1	135.5	135.1	84.6	188.7	110.3	99.4	87.2	136	65.8	64.2	80.1	134.4	113.2	138.3	79.4	90.1	70	133.3	177.6	131.3	121.7	91.7	131.1	60.8	161.8	87.5	62.4	94.8	178.2	152.3	139.7	153	121.8	151.6	238.7	67.6	148.4	204.3	115.6	98	167.1	182.7	156	210.1	163.2	87.9	80	115.9
609	-637.5	-231.6	-212.5	-217.3	-459.5	-234.1	-486.7	-188.4	-416.5	-206.3	-321.9	-412.8	-179.6	-317.9	-244.8	-133.1	-331	-205.7	-151.7	-167.7	-288.3	-185.5	-198.2	-202.4	-371.4	-474.5	-302.6	-361.7	-436.9	-841.6	-319.6	-286.1	-272.9	-434.4	-602.9	-372.1	-366.5	-262.3	-275.5	-240.3	-240.9	-340.4	-369.5	-175.5	-373.4	-505.3	-386.1	-430.9	-172.8
610	162.5	125.7	88.4	94.4	148.8	62.7	134.4	98.4	114.1	27.8	44.8	61.4	100.6	85.7	74.6	64.8	28.5	71.7	55.7	80.2	98.4	82.1	102.2	98.4	157.3	113	99.6	82.1	94	198.8	134.4	130.7	115.1	165.4	188.2	126.1	158	101.9	164.5	101.7	127.6	67.3	118.7	102	86.8	150.6	89.6	85.1	49.7
611	62.6	-0.4	21.3	41.5	50.8	35.1	51.1	22.5	11.9	30.9	54.6	35.4	43.7	45	65.3	23.9	23.7	41	20.8	17.6	57.5	43.2	31.4	116.5	54.5	30.5	52.1	66.6	110.4	27.2	48	65.7	16.5	98.7	64.7	39.7	78.5	45.1	81.9	61	44.7	57.7	65.4	59.9	11.9	41.3	21.8	25.6	36.5
612	106.4	112.8	130	156.6	230.2	133.2	192.6	93.4	391.1	162.6	189.4	122.7	148.5	180.2	287.8	91.1	287.3	80.7	110.1	52.7	67.7	137.2	139.7	109.8	124.8	148.8	226.5	106.5	319.1	141.5	114.5	137.1	147.9	121.5	476.9	167	214.9	291.4	356.4	222.6	190.6	397	112.6	204.7	315	243.6	131.8	84.3	104.7
613	0.2	13.6	44.6	29.5	31.2	46.2	19	10.3	7.5	39.7	24	66.7	19.4	29.1	51.6	0.3	19	36.4	7	9.2	11.6	18.2	40.3	22.4	-20.5	43.2	22.1	26.7	59.6	32.7	69.6	30.3	13.4	55.9	21.9	-6.8	40.3	17.3	23.2	5.6	19.6	58.3	32.7	56.9	69.4	67.5	-7.9	38.9	28
614	-116.1	-54.2	-30.5	-24.7	-64.6	-27.7	-81.5	-16.2	-45.8	-31.4	-40.4	-47.6	-26.4	-40.8	-33.4	-12.1	-41.3	-24.8	-25.3	-24.5	-37	-1.1	-41.2	-26.9	-18.9	-68.2	-39	-9.5	-4.5	-76.6	-35.4	-49.3	-57.9	-48.8	-45.4	-46.4	-32	-55.1	-80.6	-46.3	-54.6	-46.9	-92.5	5.7	-33	-51.9	-7.1	-60.1	-25.8
615	19.8	1.8	21.4	27.5	-17.9	-48.4	43.1	2	-3.7	38.8	29.2	30.5	30.4	4.8	-5.7	14	57.7	16.9	2.3	5.9	30.6	23.3	19.1	8.5	-41.4	28.4	15.8	15.7	-33.5	-34.4	-14	11.6	28.1	52.2	45.4	0	-37	-33.6	-23.3	10.8	38.3	43.7	9.2	24.6	20.6	-26.5	8.8	66	12.9
616	18.4	45.8	16.2	12.3	11.3	22.7	22.7	19	17.5	1.1	0.2	8.2	19.8	13.9	13.5	19.2	7.8	18.9	21.9	8.1	38.9	17.9	11.3	26.2	1	41.5	10.6	25.7	83.2	56.1	20.2	18.8	8.3	12.6	39.4	26.2	24.7	19.6	31.5	31.5	14.5	8.6	28.3	37.9	15.2	9.5	15.5	6.1	4.9
617	158.3	146.3	69.8	145	97.9	143.3	162.3	40.3	111.3	37.3	67.6	48.6	97	62.2	92.9	75.1	83.1	24	48.2	21.5	129.7	133.4	138.4	98.2	155.3	158.5	96.9	120.1	170.2	248.9	77.9	106.4	127.3	80.3	211.2	37.1	108.8	43.5	122	88.2	9.2	15.8	104.5	59.6	104	114.5	107.3	55.1	52.2
618	-253.5	173.4	-2.8	216.5	121.9	126.1	-243.7	109.9	-85	-9.9	69.8	-113.1	199.3	226.2	248.3	25.7	215.8	-21.4	117.3	36.2	150.4	216	226.6	271.1	-42.5	451.2	298.6	341.6	125.8	-8.3	162	217.3	-7.5	134	-371.1	-110.8	-179.7	260	194.9	63.8	194.6	50.3	196.8	190.7	24.5	68	52.2	80.6	83.1
619	50.8	43.4	52.5	21.4	48.1	17.3	24.2	76.1	105	20.8	36.1	20.4	65.8	24.9	68.6	27.4	25.9	54.2	81	67.3	15.8	11.3	45.1	40.6	123.3	31.9	19.2	8.4	37.2	-42.6	17.1	44.9	0.4	32.5	-20.8	62.4	97.4	45.1	-41	49.9	41.9	-24.8	81	26.3	95.8	40.9	68.1	31.6	24.1
620	77.7	135.8	175.9	58.7	25	69.8	24.9	27.2	127.7	50.9	27.6	41.8	70.9	65.3	39.4	59.9	54	108.4	71.3	60	67.5	100	148.3	79.9	97.9	86.5	63.2	13.5	135.7	124.5	59.8	62.7	66	42.6	118.2	273.7	71.3	73.9	78.6	132.6	112.8	65.6	263.6	123.6	155.9	124.9	117.4	24.3	95.5
621	16.9	15.1	-14.3	-17.7	-24.6	-0.8	-50.3	-23.4	-0.2	-36.4	-49	-22.1	34.8	-29.7	-42.7	10.5	-34.1	-9.8	112.4	0.2	27.5	22.1	18.6	52.1	-5.1	-51	40.3	18	13.6	-30.2	-27.2	34.9	-12.5	34.1	-100	-17.9	-62.7	1.1	-9.6	-5.2	8.2	-28.9	23.4	17.5	-49.9	13.6	-8.3	-35.1	-8.5
622	220.6	184.7	198.5	180.5	157.4	290.8	148.1	244.7	162.7	239.5	199.4	256.1	183.9	215.1	166.8	164.3	141.5	217.3	154.9	166.5	130.3	124.3	212.2	159.2	151.6	269.5	99	203.2	266.2	377.2	186.8	231.4	339.2	288	276.8	177.4	245.3	347.7	194.5	237.5	313.4	89	207.4	183.1	203.3	215.8	251.7	147.2	263.4
623	675.4	418.5	407.2	314.2	371.3	274.9	313.6	235.2	388.7	228.8	640.4	482.6	405.4	311.6	382.1	209.1	361.2	352.3	384.5	138.7	305.4	316.5	443.8	345.7	350.6	722.9	409.5	393.8	391	478.3	309	319.4	377.5	275.7	458.7	158.5	208.4	232.6	614.5	456.2	264.7	706.7	118.4	301.2	85.4	539.5	549.2	231.6	357.7
624	-2.7	40.8	55	59.9	2	105.6	81.4	4.1	-94.2	94.6	125.1	38.7	47.5	-17.3	33.2	143.1	48.8	-5.6	15.4	113	-16.3	186.2	10.9	38.5	-41.8	-6	-28.7	2.3	6.2	55.3	-19.6	-17.9	-55.5	47.8	187.9	1.4	-50.2	40.9	-55.7	97.9	33.3	-87.9	-63.4	55.1	7.6	83	54	29.7	1.8
625	-7.6	40.7	18.7	10.1	-18.9	-1.7	-12.4	-1.5	-14.9	-11.4	20.8	-8.1	12.8	36.8	19.1	13.8	1.4	12.6	24.9	29.3	4.4	2	15.8	21.2	2.2	-3.8	-6.3	-9.1	23.9	21.7	8.8	18.4	-11.4	-13.1	20	36.6	-4.8	1.2	24	20.4	21.2	-7.7	7.2	15.7	9	10.7	35.1	-2	4.6
626	37.6	171.6	100.5	137.9	38.9	201.1	86.9	147.3	16.9	196.3	-42	-56.9	80.1	115.9	157	9.9	26.7	78.7	97.3	222.8	8.4	164.9	78.3	111.4	120.5	-33	132.7	7.8	78.6	-79.8	134.3	162.1	107.1	185.2	28.3	116.7	-13.7	177.6	168.9	253.5	152.1	120.2	45.6	29.9	174.4	13.2	110.3	-123.3	117.6
627	-4.6	-8.7	114	57.4	-3.6	40.6	26.9	6.8	-69.3	121.8	103	88.3	106	90.9	67.7	-5	-23.3	-0.6	19.6	51.8	60.8	84.8	7.2	131.6	109.2	145.5	61.4	30.3	-18.4	-13.9	66.2	60.9	125.1	51.8	230.7	38.7	-26.6	67.9	1.7	21.5	61.5	-42.8	39.7	38.2	132	-31.6	17.8	3.8	33.7
628	3.8	61.4	178.4	78.3	177.3	107.9	258.3	74.3	-2.6	-47.5	-24.5	15.4	92.5	65	-4.5	-26.7	44.2	36.1	-12.1	23.3	0.1	11.6	151.4	-1.4	-14.6	-101.4	-4.5	54.7	102.1	35.3	59.9	22.7	54.1	121.2	412.6	117.5	-146.4	35.5	-12.3	-38.9	66.9	-1.6	133.4	-12.9	-19.5	-151.1	-1.6	3.2	16.4
629	46.7	179.7	194.6	100.2	63	111.5	65.4	82.3	108.3	115.8	65.8	71.9	172.9	123.1	143	58.7	322.6	104.7	139	119	102.3	160.5	111	152	357.4	63.6	112	99	85.8	140.7	126.8	109.2	127.3	233.2	242.3	116.8	67.6	203.2	116.4	102.1	132	34.4	90.1	106.1	218	98.9	108.7	85.6	111.7
630	-79.5	-10	24	-31	-39	-29.6	9.1	23.2	-65	-32.2	-52.8	-93.6	47.6	-8.6	-32.8	-33.4	-72.1	-8.5	-7.3	-13.8	12.6	-12.2	-11.3	-4.3	-123	-40.8	-15.8	16.8	13.3	-6.1	-25.3	-44.7	-22.9	-9.9	-235.9	-50.2	-64.6	-82.6	53.1	-48.4	-28.7	-44.6	-17.7	65.8	-15.4	-59.5	-26.6	-69.7	72.5
631	-10.6	75.7	50.5	56.2	2.2	-5.3	67.6	14.5	139.4	57.2	31.1	4.1	72.7	34.2	60.2	46.7	53.9	3.2	75.1	26.6	7.1	16	19.4	61.9	-33.5	132	27.8	80.6	57.3	22	117.6	56.1	77.1	4.7	2.7	105.4	68.8	118.2	129.8	47.5	73.5	39.5	39.6	87	82.8	143.7	116.1	19	28.8
632	-31.3	55.7	84	7.5	33.5	2.5	36	55.3	73.2	13	-12.3	-6.5	61.8	27.7	62.2	57.9	-11	35.9	60.7	19.6	36.4	19	47.7	59.8	-14.7	53.5	8.6	19.4	37.3	79.6	60.1	54.1	37.4	44.4	26.4	34.7	-5.9	-0.3	-8.3	34.6	8.8	101.5	63	76.4	56.8	20	63	6.3	25.4
633	82.4	158	-3	13.9	112	-16.5	137.5	9.2	69.6	80.6	12.9	116.9	-10.9	29.2	104.2	6.8	23.9	22.7	22.4	20.8	22.2	83.3	10.4	24.3	23.5	91	106.9	19.8	67.9	261.1	104.6	86.4	112.8	124.3	128	11.8	105.3	103.2	59.3	45	-23.2	5	132.7	61.8	177.1	81.6	9.9	-3.4	-5.2
634	-117.4	20.7	41	-16.2	-14	-13.8	-45.2	-4.9	-20.7	-1.7	-24.7	-31.3	58.4	-16.6	-20.8	-15.7	-3.9	-0.9	-19.9	-9.3	20.1	12	-19.2	4.5	-93.8	32	-15.4	53.7	-11.6	-109.9	-17.2	-29.1	-12.5	23.9	-45.6	78.9	14.2	1.9	-16.8	-22.1	115.5	18.7	-16.2	7.5	1.4	7	10.1	29.6	4.6
635	189.1	358.1	208.7	174.3	278.9	138.8	178.2	154.7	326.9	195	190.9	268.4	200.9	214	192.6	205.4	306.2	122.3	234.6	274	163.8	306.1	136	191.3	240.6	685	122.8	162.5	129.2	189.8	266.8	146.3	199	182.9	104.4	358.6	225.6	282.9	483.9	198.8	366.3	136	198.6	189.9	834	439.3	238	156.9	149.2
636	950.9	228.8	263.1	156.7	218	203.7	59	239.5	430.8	303.7	292.2	256.3	136.7	221	150.2	393.8	354.8	367	252.8	169.8	49.8	69.5	90	64.6	47.8	125.7	148.2	127.1	349.2	309.2	178.3	355	196.6	179.3	232.6	230.4	398.8	163.2	6	327	422.6	54.9	243.4	126	146.4	321	441.9	195.2	214.6
637	-274.5	-21.4	-44.2	-251.4	-112.7	12	-346.2	-96.9	-93.4	-128.5	-68.2	-314.7	-271.1	-121.8	-280.3	-49	-452.2	-113.4	-94.2	-39	-446.4	-212.7	-179.6	-223.5	2.4	-159.6	-214.3	-147.3	-259.8	-393.5	-206.3	-247.3	-212.5	-609.2	-1181.5	-333.5	-204.3	-52.1	21.7	-91	-420.5	-43.4	-176.2	-151.3	-109.5	59.6	-30.9	-380.5	-109.5
638	-45.4	2	9.5	42.7	43.2	64.1	67.4	30.5	-23.5	-46.3	-41	-72.9	38.7	13.8	76.8	34.7	-60	-1.3	-30.9	-3.6	24.6	41.7	63.5	19.7	-42.5	34.4	46.8	63.1	86.9	-84.8	51.1	13.4	28.8	44.5	-87	26.3	21.3	-17.3	-46.2	28.1	-75.2	-2.3	29.9	25	-13.4	-34.6	73	-52.5	-9.4
639	15.8	181.8	120.7	78.3	97.9	142.6	36.8	101.9	152.6	72.4	52.9	16.5	86.7	80	170.1	106.1	104.3	64.6	47.2	35.1	80	129.5	80.4	63.3	63.1	203.3	113	61.2	137.1	54.1	57.7	108.7	177	53	154.9	127.4	49.9	173.1	158.3	-10.9	173.3	72.2	68.2	111.6	140.9	133.6	239	20	54.4
640	68.8	357.7	151.9	195.9	135.7	155.9	-1.4	63.4	220.5	89.1	236.5	142.5	167.2	190.5	65.5	111.9	214.9	253.3	218.4	146.2	125.6	129.1	193	105.6	399.6	158.4	61.3	155.7	162.2	249.5	72.3	189.8	110.4	244.3	118.5	236.5	148.7	163.4	151.2	117	241.6	151.3	76.7	87.2	135.7	114.3	133.9	114.5	64.9
641	884.3	229.2	252.7	138.4	414.2	504.7	690.3	850.1	353	1119.3	310.7	300.2	75.7	237.1	133.5	1057.1	1.1	706.3	314.9	570.2	331.3	133.4	191.9	129.4	328.8	16.5	432.8	308.1	390.2	365.4	372.4	590.3	140.3	499.1	152	681	282.2	320.2	124.7	612.6	596.3	187.7	285.8	238.2	238.2	654.8	294	317.2	119.8
642	93.6	169.4	75.5	74.6	123.6	101.2	141.4	149.1	195.8	78.7	102.5	81	143.3	70.3	147	82.3	73.6	85.5	59.4	49.3	91.1	88.3	148.2	90.8	141.5	192.9	95.2	127.6	193	161.5	82.1	129.8	146	177.8	182.6	103.1	80.2	149.9	236.4	187	124.9	165.1	125.6	130.8	170.7	169.4	110.7	97.3	71.3
643	61.3	46.8	67	39.1	23	16.6	28	47.4	43.9	14.9	45.8	39.2	20.8	32.3	9.8	11.9	26.5	29.4	12.3	31	33.3	38.8	40.2	26.4	41.1	129.5	37.1	19.2	46.7	94.6	-1.7	26.3	31.8	30.7	67.7	29.4	17.6	37.5	47.1	63.7	57.8	0.3	43.3	13.9	24.3	34.9	41.4	31.5	23.8
644	197.9	140.2	92.1	151.6	68.9	44.7	48.5	109.6	59.3	107.6	81.7	108.7	87.1	84.1	196.7	109.6	5.8	121.8	156.3	253.6	70.3	77.1	151.4	115.1	50.6	130.4	118.2	25.6	121.3	69.3	193	156.4	169.7	96.3	73.4	200.8	182.8	194.7	201.6	113.5	68.3	94.2	95.9	66.7	184.2	246.2	129.2	73.3	131.1
645	-17.3	-21.5	-17.2	13	-34.4	-5.7	-7.9	4.7	-19.7	2.8	-14.1	-12.2	1.8	12.3	-6	12	-13.1	1.9	-12.8	9.4	7.7	17.3	-8.9	-13.6	-96.1	6.5	-15.5	-20.5	25.3	11.6	-7.4	-1.1	-10.7	-3.4	-35.1	-5.2	-8.3	0.6	29.6	-3.1	-7.6	-17.6	-13	-5.9	-64.2	20.9	-1.5	-13.8	7.5
646	242.9	378.3	601.7	277	147.6	244.5	226.3	230.3	472.6	191.2	205.7	258.6	930.3	193.2	718.2	224.8	279.3	212.4	264.5	154.9	253.9	3039.1	124.1	359.5	91.5	1077.5	242.3	665.6	1054.5	142.7	319	123	156	94.2	656.3	315.9	229.4	233.3	700.8	105.2	167.6	309.5	180.8	1424.5	393.9	109.2	105.2	109.3	177.6
647	125.7	86.2	102.5	120.8	80.1	53.2	94	66.8	20.6	53.5	95.3	70.1	89.7	122.3	103.5	75.8	137.9	53.4	141.9	77.3	68.1	93.4	121.1	102.9	45	74.4	59.9	81.5	23.9	59.9	112.6	93.8	95.9	129	62.8	67.3	42.8	137.9	6.5	56.7	41.9	-4	70.6	51	89.7	80.2	81.8	60.8	86.1
648	106.9	206.4	69.8	141.4	122.4	94.6	22.2	90.2	374.7	4.4	67.2	86.3	42.7	109.8	60.2	67.8	-1	75.5	53.5	87.9	103.6	64.2	98.6	145.1	132.5	115.1	107.3	115.8	138.7	260.8	47.8	142.8	99.8	9.2	-194.6	104.4	352.8	225.3	267.2	326.9	238.9	151.3	50.1	120	187.5	170.8	205.8	62.4	115.6
649	287.9	365.8	271.4	628.7	443.1	271.4	310	334.8	408.1	280.9	483.2	391.8	400.6	399.7	451.1	403.4	443.1	274.6	309.4	528.3	252.1	453.6	570.2	396.4	422.9	577.6	416.1	423.9	226.4	409.5	371.5	397.7	201.5	329.3	457.2	621.2	210	368	377.4	428.5	556.6	144.4	309.1	417	404.3	316.8	408.2	438.3	365.9
650	340.3	290.8	337.2	369.4	1140.3	279.7	105.4	180	239.6	110.1	-106.2	131.4	50.3	218.1	130.8	275.9	221.7	202.1	133.2	323.8	314.9	355.2	197.3	235.6	403.4	579.5	150.3	399.1	527.5	854.5	306.1	403.3	367.6	351.6	660.3	155.7	548.3	226.1	317.8	388.6	130.7	353.3	43.7	311.6	-168.3	266.5	178.1	-37.3	125.3
651	41.2	-38.3	1.2	1.5	-171.8	-101.7	71.4	39.7	-19.8	-73.4	-54.4	0.5	-87.3	-75.9	-0.3	4.3	-17.8	16.9	13.5	-56.7	-56.4	-127.1	-18.3	-129.7	66.9	-158.7	-33.5	-120	-25.6	-52.2	-153.4	-35.3	-86.8	-39.2	-33.8	-59	30.3	-121	-201.1	-16.3	-37.2	15.8	-93.5	6.1	-26.5	-52.3	76.9	15	-109
652	2.2	-1.5	3.2	7	0.3	5.4	-4.5	-1.8	21.4	3	-6.1	7.8	3.2	14.3	1.2	-22.3	-5.2	6.7	4.1	4.4	-10.5	6.1	1.9	9.1	-60.4	12.5	7.5	18.1	17.3	-36.9	-22.3	-2.3	-4.2	1.7	47.3	-24.9	-10.8	24.4	-6.8	8.3	-22.8	3.5	-12.3	-11.1	-7.1	-36.2	-18.6	3.8	3
653	17.8	-18.5	5.1	-1.9	-8.7	6.1	-10.7	3.2	-28.3	-0.5	6.6	9.4	42.7	16.2	38.4	6.1	-0.4	-7.9	18.6	4.5	25.4	2.4	-2.5	26	43	11.1	18.5	17	89.9	-18.6	33.1	8.9	35.7	19	105.2	21.6	31.6	-0.5	56.1	-2.5	2.8	-31.7	-9.1	16.1	34.3	16.6	1.2	17.7	0.5
654	333	154.8	156.6	254	256.9	316	444.5	147.1	163.6	133.8	182.1	214.7	343.4	431.9	702.7	100.1	171.8	143.1	214.1	95.3	500	319	194.9	832	365.4	386.3	474.5	436.3	373.2	466.3	409.1	334.3	469	753.8	418.6	139.2	170.5	209.7	272.2	265.4	308.1	280.8	532.2	155.9	123.4	211.9	195.7	302.1	240.7
655	147.4	61	50.4	65.6	25.2	31.5	27.7	37.8	70.4	22.2	63	55.9	9.2	26.7	19.6	43.1	56.3	23.2	53.7	20.6	38	37.7	48.3	38.2	110.6	101.3	70.9	39.3	24.8	178.6	1.6	68.1	69.3	101.5	14.7	26.5	73.8	81.2	132.7	101.8	64.5	21.5	68.7	27.8	70	52.9	59.5	64.6	55.4
656	188	234	89	104	58.7	124.6	126.7	96.9	30	69	156.5	163.9	55.9	197.3	74.7	101.5	93.8	152	128.7	204	117.9	31.4	50.8	143.9	35	84.2	91.6	120	92.9	141.2	57.9	64.9	95.4	63.6	179.3	96.1	125.3	97.4	112.9	121.9	91.8	127.8	63	123.9	51	483.9	165.9	30.1	125.7
657	24.9	-12.6	26.4	12.2	-6.1	13.8	44	8.5	46	5.3	28.4	31.5	6.6	10.3	-12.7	10.3	28.5	12.2	4.9	14.9	24.6	-5.3	3.9	-7.1	21.9	54.1	17.6	19.1	18.9	71.7	15.2	-2	9.9	25	64.5	28.8	44.2	13.7	5.6	64.5	32.3	21.7	19.9	14	18.1	7.1	10.6	28.3	23.5
658	98.1	72.9	102.1	41.7	45.1	49.4	111	86.4	116.8	37.4	97.5	129.9	121.7	83.5	125.4	129.9	78.3	25.2	151	245.4	79.8	311.9	47.8	112.5	64.2	55.5	29.6	100.5	190	76.4	90.2	73	28.9	78.6	49.3	63	66.4	241.7	126.3	99.1	102.5	176.7	120.1	426.6	138.4	190.1	61.1	29.5	49.2
659	17.9	16.5	26.7	30.7	24.3	16.2	62.9	8	-34.6	22.7	-1.5	11.8	70.8	48.9	73.3	1.7	16.8	42.6	71.3	21.1	49.7	16.2	38.8	71.9	-7	16.7	50.8	13.9	-37.7	-47.1	23.9	32.5	34.4	109.3	43.3	76.6	-15.8	10.9	4.5	-11	17.6	-0.7	36	26.4	36.8	-14.4	42.4	8.6	23.2
660	20.8	44.8	67.5	28.2	16	58.9	40.3	44.5	30.2	20.2	24.2	34.9	53.5	55.3	64.5	47.3	28.5	55.9	56.6	44.8	37.9	23.9	28.9	46.5	133.8	26.1	29.8	31.7	74.8	67.9	51	46.2	23.1	42.7	0.4	66.1	20	47.3	74	16	48	17.4	52.8	48.8	81.5	76.2	44.7	31.9	27.8
661	317.9	436.1	240.4	193.8	162.6	278	540.9	288.4	203.7	234.7	128.4	398.8	421.4	378.6	291.1	433.2	123.4	248.5	154.4	448.8	268.7	195.4	189.9	388.6	242.3	501.5	367.4	237.7	236	298.8	354.7	229.4	86.3	357.5	257.3	661.5	161.3	476.8	1068.5	204.1	767.2	464.3	115.6	436.6	260.4	538	457.2	166.9	304.7
662	-25.9	-8.5	34	22.2	1.1	-32.2	-26.3	-32.2	-10.8	23.4	16.5	-48.6	93.3	-15.1	-0.7	-17.8	50.9	-17.9	-29.5	11.1	32.1	43.7	4.8	49.7	61.7	-36.5	1.9	6.2	-78.2	22.1	34	-22.5	-4.9	-6.2	-62.2	24.5	-43	-18.6	-44.7	-48	-2.3	15.5	-34.2	133.6	-40.5	-34.8	-46.9	5	-19.8
663	635.8	360.9	198.5	206.8	261.1	279	227.1	182.7	216.7	196.2	183.7	323.8	251.3	207.1	205.8	146	98	204.2	253.1	290.3	222.6	165	206.2	234.5	293.5	305.8	295.6	211.1	293.4	337.9	274.3	265.3	353	282.1	346.4	354.7	375	361.5	506.2	317.6	149.9	423.4	255.5	227.3	224.6	286.6	236	183.2	240.6
664	232.3	126.3	356.6	289.9	135.9	202.4	210	64.8	310.7	198.7	209.4	146.6	236.2	293.9	186.9	64.3	254	146.3	137	114.2	225	311.8	200.2	187.8	368.6	471.2	216	202.2	188.4	268	248.3	206.7	276.8	291.5	556.2	297.8	200.5	252.5	432	154.8	448.9	254	265.6	154.8	303.4	211.3	332.5	129.3	114
665	-70.5	63.6	14.8	5.4	-4.5	28.2	-43.9	32.9	-10.6	-9.8	-22.6	10.7	26.9	-11.2	23.1	-10.9	-7.8	32.6	3.8	31.2	10.6	85.7	-0.4	63.5	49.1	16.6	8.5	99.6	-60.2	-23.4	15.3	39	0	35	-124.4	41.4	-22.5	39.8	48.9	30.9	70.3	-2.3	29.4	49.7	2	13.6	47.5	34.1	22.8
666	339.3	301.7	231.1	221.4	293	287.1	346.5	67.3	193.7	173	182.8	157	111.3	173	144.7	65	252.5	179.2	100.6	161.9	195.8	230.4	166	187.4	164.9	258.4	204.8	364.5	489.2	492.9	313.1	303.8	261.4	181.7	408	173.4	99.3	249.8	310.7	145.6	201.8	419.5	403	249.4	125.1	180.2	180.2	326	215
667	366.6	284.9	248.3	191.8	228.7	207	289.4	74.6	264.6	246.5	50.1	251	134.8	147	231.9	68.1	170.4	124.6	88.3	83.5	198.8	252.8	205	177	313.5	244.8	210.5	197.7	480.6	771.8	306.9	163.4	184.3	163.9	431.1	188.2	234.2	230.7	172.2	270.5	155.4	355.3	302.3	186.1	275.2	129.2	264.8	295.5	178.2
668	365.3	224.4	293.7	164.8	269.5	283.9	246	341.7	160.1	359.9	332.8	238.2	189.5	144.4	214.4	330.5	137.9	177	155.5	189.7	393.8	217.1	183.5	180.1	182.8	231	291.2	336.8	180.9	287.3	249.3	180.1	165.6	304.9	258.5	190.3	220.3	108.1	184.7	171.3	244.4	701.8	296.2	237	218.8	215.7	174.8	282.3	197.1
669	-124.3	-39.5	-53.7	-74.5	-130.3	-94.2	-256.8	-13.8	-270.6	-40.7	-67	-82	43.4	-147.1	-201.1	-39.7	-56.5	-101.9	28.2	-11.1	-36.2	-61.2	-71.4	-54.6	-87.3	-216.6	-83.9	-69.5	-129.1	-248.9	-35.8	-108.8	-142.3	-202	-295.3	-30.7	-179.8	-77.4	-56.8	-134.5	-51.1	-64.4	-42.3	-71.3	-156.1	-203.9	-101.9	-72.5	-5
670	42.7	71.8	38.2	44.1	52.9	30.5	27.4	18	31.2	34.9	20.3	117.8	41	40.5	-2.7	56.4	51.2	62.5	52.6	59.1	43.2	15.9	24.3	50.9	31.5	46.2	28.1	24	6.6	17.1	51.2	57.7	12.5	7	97.5	67.1	32.8	57.4	72.9	23.1	93.8	25.1	33	60.7	82.5	85.2	97.2	47.6	53.5
671	117.9	53	24.6	21	93.3	117.2	32.8	115.8	60.9	34.6	64.2	64.6	74.3	79.3	59	-0.9	98.7	71.9	144.9	107.9	50.1	72.8	117	80.4	99.2	-25.7	161.3	54.3	80.1	60.6	62.6	66	45.8	82.8	1	59.1	139	96.8	121.7	2.9	42.1	12.4	44.6	56.6	20.4	-20.6	69.9	98.3	200.6
672	10.1	2.5	108.3	-2.2	-67.2	35	73.9	32.3	-22.1	-8.3	47.8	-37.9	10.1	-12.3	7	48.9	-47.4	53.9	71	77.5	33.2	50.5	-26	97.8	61.6	54.6	12.6	1.7	-25.4	127.4	46.9	-13.2	-43	-41.8	-177	69	-48.4	13.7	122.7	5.4	44.1	130	-45.8	96.3	-1.2	47.6	45.8	-70.9	109.7
673	123.5	139.5	175.1	92.2	77.6	65.4	77.7	51.6	150.2	114.6	147.6	75.4	160.1	5.3	64.5	104.2	152.8	96	41.5	84.5	73.9	121.9	56.4	116.6	117.4	142	75.6	37.9	130.1	68.2	106.4	68.6	41.9	77.9	133.5	143.4	-24.1	52.7	172	73.3	150.3	64.9	103.7	77.2	137.6	100.6	154.7	101.9	95.8
674	10.5	190.3	274.6	224.7	228.3	160.5	142.6	11.3	254	186.7	90.4	180.5	280.7	157.6	121.5	83.1	195.4	45.7	105.6	86	18.4	189.5	233.4	213.5	77.1	388.9	188.8	138.2	275.7	298.1	140.6	172.2	197.3	204.3	161.7	109.5	71.9	108.4	188.3	79.4	160.5	333.9	132.5	94.1	220.8	45.6	142.6	193.9	81.6
675	-1.5	16.8	17.1	-6.6	4.5	-23.1	22.6	-3.9	90.3	10.7	-26.7	0.6	-9.3	10.7	10.3	-6.4	19.5	4.4	-5.4	-14.1	4.4	-18.4	8.9	15.6	-29.2	-12.2	6.7	6	-4.1	-4	19.1	14.3	-15.5	-14.9	97.6	3.8	-39.5	31.2	46.1	-46.3	-23.6	-13	21.4	-13.8	-36.8	37.7	23.4	34.2	-25.9
676	103.4	108.1	84.8	38.3	-19	-2.2	80	66.3	163.1	85	93.5	106.6	118.9	47.9	71.6	20.4	136.1	20	61.2	24.3	132.5	147.3	85.6	123.6	85.7	30.2	93	98.9	76.1	150.5	92.3	82.8	61.3	130.2	69.1	11.7	-5.6	66.3	112.8	104.9	99	90.7	57.4	99.9	-307.9	83.8	99.7	122.4	42.6
677	90.4	38.2	46.9	99.8	32.5	73.1	35.7	38.8	72.4	96.5	42	92	89.4	64.1	147.1	42.5	255.6	-12.6	93.3	60.4	130.3	31	13.4	58.8	55.5	165.1	55.5	48.4	66.6	191.4	123.7	85.5	97	104.2	189.4	92.6	120.5	124.2	163.6	96.3	107.3	4.7	43.5	147.1	-6.4	154.3	77.9	22.3	23
678	67.9	77.5	139	72.1	96.2	52.7	92.8	46.9	74	59.5	62.1	39.3	71.3	85.9	80	56.1	113	58	60.3	63.1	67.8	113.6	55.9	90.6	125.8	167.6	31.6	51.6	65.9	209.7	49.8	116.7	59.7	43	168	145.3	85.1	82.6	116.1	84.4	125	108.1	52.4	117.6	118	93.2	120.7	13.9	38
679	162.3	145.2	147.8	129.3	106.6	136.4	131.2	88.7	131	99.3	109	119.2	139.6	111.9	126.5	63.1	174.4	129.8	115.9	115.9	117.9	141.4	98.4	132.6	192.7	188.5	141.6	130.1	71.1	167.1	118.9	128.4	160.4	155.9	221.8	122.7	107.8	144	160.4	162.5	130.4	144.3	108.4	149	254.8	175.3	141.7	141.6	136
680	35.7	-6.6	0.9	14.9	9.8	1.5	6	3.3	-21	-0.1	8	5	-2.6	15.1	10.7	3.3	-5	7.3	46.1	-0.1	0.5	4.8	4.4	14.9	-53.9	30.4	15.3	7	-9.1	53	-7.5	2.1	17.4	23.5	-4.8	9.5	59	7.7	-0.2	8.9	2.8	19.8	6.2	24.1	-13.7	12.4	17.2	20.8	-1.4
681	138.3	12.6	26.4	48.5	14.1	22.7	46.4	22.1	1.1	17.5	30.9	38.1	40.2	22.5	16.5	27.1	0.6	23.2	70.1	32.8	28.7	13.2	27.8	6.6	17.6	64.1	49.8	47.2	11.5	85.7	13.4	26.6	31.6	32.5	26.4	64.7	23.5	14.9	-4.1	-8.6	17.4	26	49.5	38.7	52.6	25.4	72.1	31.6	19.7
682	54.1	86.9	64.4	53.1	51.4	37.5	67.6	33.4	53.8	23.3	69.6	47	46.8	47.9	72.5	34.6	70.9	44.6	41	55.5	58.1	49.8	36.2	88.1	100.8	166.9	47.9	53.6	64.5	76.2	86.4	58.8	45.6	43	265.2	54.9	100	97.7	38.2	47.7	56.1	56.7	122.3	36.4	77.3	73.1	37.4	47.5	55.7
683	236.4	41.3	82.1	110.3	143.8	113.6	170.4	107	53.4	109.8	134.7	158.2	169.2	144.4	117.9	44.6	40.2	111.6	100.3	53	132.2	113.3	152.6	147.6	171.1	165.3	177.6	140.7	138.9	288.6	131	146.3	123.2	189.6	341.1	65.1	131.1	80.7	137.7	133.7	70.6	85.8	134.1	112	74	128.7	60.6	183.8	109.1
684	-65.3	-46.6	-30.2	-34.1	-52	-28	-23.8	-18.4	-69.9	-11.3	-43.8	-13.7	-25.5	-27.5	-39.7	-12.3	-47.5	-21.9	-10.3	-8.9	-13.2	-25.5	-27	-27.1	-88.7	-65.1	-34.3	-55.9	-23.5	-123.7	-5.3	-35.6	-17.4	-79.9	-40.1	-1.1	-45	-21.4	-46.6	-36.3	-4.7	-79	-37.1	-3.5	-65.1	-46.7	-36	-22.9	-18.2
685	301.5	149.2	98.4	28	78.4	97.8	88.4	68.8	28.8	130.1	223.2	101.8	57	54.6	60	75.5	53.3	108.1	123.7	160.3	74.5	62.4	19.5	137.5	48	67.9	101.3	71.4	43.6	33.5	118.7	142.6	115.6	46.8	37.9	184.8	59.4	27	39.6	50	47.2	23.8	99.3	90.6	20.8	76.2	-1.4	36.9	83.4
686	-58.2	7.7	-2.1	2.5	-41.1	-14.2	-27	-10	-59.6	-17.9	-11.3	-34.5	-5.6	6.5	-20	-1.4	-25.6	-29.4	-15.8	-1.8	-11.7	-4.9	-10.1	-4.2	32.9	1.8	-12	0.7	2.6	-65.3	9.6	2.6	12	-13.4	-47.4	-23.1	18.9	-22.4	14	4.6	7	15.9	24.5	-9.7	-17.3	-15.8	-5.4	-31.7	-15.6
687	-22.2	-71.7	-29.3	-24	-127.5	-24.3	-36.2	-26.2	-65.3	-31.8	-15.5	-6	-36.6	-38.3	1.6	-11.1	-33	-34.6	-35.6	-17.9	-9.6	-23.7	-17.7	-24	-68.9	-37.6	6.3	-27.7	-77.5	-84.2	-81.5	-51.7	-55.3	-36.4	-80	-55.5	-96.7	-53.6	-71.4	-39.3	-23.4	-86.2	-90.4	-27	-43.2	-24.3	-27.3	-58.7	-34.5
688	-78.2	31.1	-37.7	-64.5	-71.5	-46.3	-90.9	-56.1	-136.8	-26.9	-82.9	-115.6	-41.1	-37.1	-69	-60.2	-140.1	-48.9	-43	-75.7	-36.1	-15.9	-40.7	-23.8	-145.8	-40.5	34.1	1.9	-23	-273.2	-112.9	-29.6	-84.7	-129.1	-254	-34.6	-214.4	-66	-218.1	-86.7	-76.9	-26.5	-80.9	-22.6	-68.4	-92.6	-45.5	-87.2	-68.4
689	73.6	28.9	14.5	20.3	-63.6	-34.3	122.6	26.1	45.3	3.8	114.7	87	53.1	15.5	-17.2	10	-101.7	35.7	47.2	19.1	68.8	-70.3	92.2	-49.7	-9.3	-62.5	-11	90.9	-114.3	-22.4	-46.4	21.9	-81.8	-116.7	-393.2	-156.9	194.9	58.2	62	161.5	-95.8	114.5	-27.1	85.1	7.8	-41.2	67	196.9	76.6
690	52	162	144.8	75.6	40	137.6	49.1	72.6	278.5	107.8	244.5	144.7	115.9	68.5	26	63.2	84.9	143.9	146.7	27.2	126.7	147.5	88.7	46.7	258.8	229.5	122.8	81.2	202	133.7	30.9	35.6	135.9	87.4	101.7	148.9	164.3	54.2	145.2	138	79.5	203.4	178.4	194.4	125.1	166.1	136.3	67.8	121.2
691	-30.9	29.4	6.6	43.1	-11.7	60.8	169.4	49.8	-19.5	165.9	31.4	45.7	89.9	90.2	-32.8	-6.7	58.6	-10.5	13.4	9.1	94.4	125.1	56.1	134.5	147.9	52.9	135.5	41.7	284	206.8	24.2	30.6	37.8	-61.5	-169.2	-50	-169	-18.8	58.6	-62.2	1.9	-69.8	71.1	55	-5.7	121.8	-43.1	-22.3	82.6
692	6	63.8	59.5	-13.4	-26.6	70.4	23.7	38.2	81.6	18.7	27.1	50.3	48.9	12.1	-11.2	33.9	13	10.2	30	22.9	31.1	68.8	1.8	51.5	-22.3	111	-24.1	64.6	108.9	-4.2	26	45.5	41.3	102.9	46.3	88.9	85.6	40.1	23.9	80.8	-114	-29.7	-31.4	70.5	71.6	62.7	65.2	38.8	26.1
693	-95.1	38.4	15	14.3	-42.6	26.6	-9.5	13.4	-26	50.6	-7.2	-7.3	25.7	-3.4	-50.7	0.4	60.7	-37.1	-4.1	-0.6	19.4	-24.5	-56.6	-12.7	-60.5	74.8	-61.9	-6.3	49.3	4	-5	-13.3	15.8	67.2	43.1	4.7	42.6	20.7	36.8	-0.3	8.4	54.8	-10.8	6.8	-6	17.7	-5.7	22.8	-44.4
694	403.3	140.8	12.8	54.3	322.8	255.5	175.4	304.3	141	44.9	27	104.6	73.8	11.9	144.1	94.6	25.7	86.7	147.3	320.2	107.2	88.1	82.5	94	155.2	71.4	175.1	272.3	305.5	81.1	142.6	-13	289.2	23.9	164.9	203.4	600.7	83.9	128	233.4	75.2	111.2	155	82.8	58.1	53	376.5	185.4	162.2
695	-63.9	-70.6	62.8	-47.4	-93.3	-73	-36.8	-73.4	29	83.2	74	0.1	-32.9	42.9	-41.8	-60.2	42.6	-59.3	-17.4	-19	30.7	-6.4	-82.6	-4.7	109.5	2.4	-68.8	-48.5	-84	-89.8	-21.5	-63.4	26.1	5	-143	11.2	-146.3	-5.3	-73.9	-63.8	-88.1	89.9	-104.4	-33.8	-5.1	-2.3	-33.3	61.6	12.8
696	64	26.7	22.3	48.7	18.8	32.2	12.8	9.1	26.4	29.8	20.1	43.9	37.8	28.4	0.9	37	30.3	17.8	31.4	66.8	29.9	22.6	9.2	37.6	-32.1	28.8	19.7	30.9	-50.1	-0.9	38.6	26.2	11.7	48.5	38.6	23.9	-9.5	36.7	-14	33.2	30.8	18.5	26.5	48.6	48.3	10.7	52	21.5	41.7
697	277.4	237.5	251.5	248.4	127.4	176.6	53.4	168.2	64.6	167.6	165	136.9	200.4	153.8	171.4	146.1	196.2	151.4	268.1	333.8	149.3	345.8	299.4	201.3	196.2	213.4	264.2	230	45.2	111.9	123.3	398.6	317.5	519.7	81.1	387.1	62.8	265.3	233.9	99.3	366.5	135.1	279.2	186.6	292.3	167.3	205.6	122.9	161.3
698	-17.1	4.8	87.3	21.7	23.1	25.3	-92.2	177.1	161.8	86.5	25.2	46.8	35.1	50.3	6.4	21.7	118.3	68.3	75.1	66.2	125.9	64	121.3	62.1	-18.9	98.6	57.4	115.4	-69.2	-84	13.9	89.8	-18.2	-149.3	-68.7	42	-30.3	120.9	84.6	9.4	59.9	-8.6	61	119.5	75.3	23.5	52.9	148.3	254.2
699	207.3	244.5	38	20.5	37.4	92.4	-11.9	17.4	100.2	87.2	63.1	42.5	50.7	66.8	182.6	45.7	99.7	74.1	720.5	173.3	50.5	31.6	21.5	128.5	31.4	37.5	29.1	27.9	22.9	106.7	88.4	117.1	259.7	139	288.8	81	347.3	13.7	85	244.2	91.7	25.6	115.6	83	1066.5	164.7	342.2	82.3	22.5
700	37	46.7	72.3	38.8	72.7	58.8	97.2	114.9	36.9	22.3	18.4	27	77.7	100.3	54.5	65.6	60.5	83.3	94.7	158.7	96.2	89.7	63	139.2	5.7	80.5	33	71.6	19.2	30.7	110	40.7	14	12.7	46.8	69.7	68.6	59	57.3	24.5	68.1	119.5	72.2	91.2	2.5	105.2	30.2	28.2	31.2
701	126.5	44.1	79.4	123.7	125.7	103	113	176.5	58.9	91.4	79.9	65.3	153.2	77.9	90.2	135.4	19.5	104.6	115.6	137.7	140.9	124.3	97.5	115.2	118.4	57.7	94.2	85.9	63.6	55.2	75.3	92.2	77.5	89.2	48.2	187.9	91.1	115	142.6	70.7	119.8	38.2	123.3	94.7	71.3	55.2	76.8	111.2	114.1
702	185.5	902.4	463.3	445.4	97.8	680.8	515.9	563.1	25.5	185.6	993.2	339.9	192.9	1121.6	258.4	205.7	-18.2	1227.7	691.4	70.5	439.4	211.1	246.2	582.6	75	389.9	383.8	562.8	581	254.8	252.4	497.5	518.9	660.6	39.7	545.3	406.3	1013.6	482.3	305.3	248.1	297.6	363.2	271.9	53.9	2270.1	111.9	360.1	437.2
703	2154.7	721.6	1323.2	2835.1	1697.3	6451.4	2265.6	2098.1	538.1	4074.1	1819	2309.7	1759.4	2901.3	1756.2	2049.2	1105.2	2621.2	2421.3	2239.8	1333.4	2694.8	2513.9	595.1	1600	729.7	1586.6	2837.8	3877.5	2933.8	1817.8	3374.4	2406.7	1267	558.9	3451.7	4900	2757	1331	3230	1648.5	1305.6	2776.2	676	793.2	2216.4	3021	1798.3	3388.3
704	-73.2	-69.9	-7.5	-62.9	-113.5	-72.8	-72.3	-65.9	-140.9	-112.7	-93.9	-95	-67.6	-76.7	-78.5	-39.2	-124.1	-8.3	-26.9	-55	-47	-50.5	-69.7	-35	-183.1	-201.8	-54.5	-92.7	-118.5	-132.5	34.2	-26.6	-36.5	-103.8	-20.7	-66.2	-117.5	-133.9	-195.6	-168.1	-81.2	-50.7	-116.2	-45.5	-243.2	-104.9	7.3	-105.4	-49.5
705	-34.4	-32.2	-11.2	-24	-24.6	-27	-52.6	-15.7	-25.8	-33	-46.6	-55.5	-1.2	-35.2	19.5	19.3	-60	-32	27.7	-28.6	-6.2	-0.9	-19.1	10.3	4.6	-20.2	-5.1	-23	-31.7	-33.6	32.5	-24.4	-2.4	21.4	-92.5	-2.4	-28.8	-39.6	-40.7	-22.5	-25.6	-89.5	-43.8	18.8	50.5	-50	7.7	-64.8	-37
706	55.6	95.2	62.6	122.4	-95.5	90.8	118.2	85.9	35.3	63.3	202.9	251.8	105.4	198.9	125.4	95.3	83.1	71.8	24.1	54.2	292.3	114.9	146.4	302.4	305.5	41.6	201.3	27.8	-2.6	52	22.8	137.6	50	59.3	-180.7	-49.5	5.8	56.8	204.9	88.4	57.9	7.1	105.9	304.8	91.3	143.7	30.3	274	26.8
707	82.4	69.7	63.4	61.1	70.6	47.1	51.6	67.3	19.1	54.7	15.9	37.8	109.8	49.3	86.1	19.5	28.6	52.8	46	39.9	97.5	90.1	106.4	112.3	89.3	98.4	99	92.3	118	-0.2	81.1	91.5	97.7	107.3	101.6	59.3	43.4	85.6	135.5	47.9	150.1	31	142.7	104.7	65	52.7	39.6	57.4	64
708	57.8	113.9	157.3	146.5	75.3	116.4	10.5	89.6	225.5	158.3	213.4	132.4	109.1	149.1	78.4	60.1	214.6	112.7	118.9	69.9	20.4	164.3	114.3	130.7	164.1	72.3	125.8	135.7	95.8	20.6	22.2	40.5	6.3	137.8	-24.5	58.9	32.5	158.4	183.2	197	116.3	101.3	-10.6	127	200.2	126.2	80.3	129.9	137.9
709	224	539	175.5	231	360.1	195.3	150.4	768.8	241.6	217	642.2	218.2	113.1	220	163.2	180.6	107.9	421	121.2	260.8	248.2	113.4	606.8	172	68.6	295.4	187.8	345.6	300.2	376.1	353.9	277.4	164.8	143.9	23.5	353.4	282.7	295.2	96.4	215.1	156.5	584.4	371.8	214.9	43.5	302.9	363.1	170	346.8
710	194.3	483.8	205.9	133	122.3	271.5	170	137.9	101.3	117.5	133.4	213.8	238.5	215.7	190.1	92.2	66.5	198.4	194.2	234.4	240.7	238.9	232.5	218.8	206.9	457.3	341.8	261.5	165	275.6	157.8	217	188.1	293.2	233.9	186.6	267.8	194.2	416.6	261.6	193.5	114.9	136.9	224.7	187	142.5	299.6	93.4	217.8
711	319.6	472.5	215.9	572.8	440.8	482.4	589.7	432.2	259.6	232	414.8	280.9	394.6	439	317.6	291.5	155.7	267.6	325.5	431.7	350.6	251.8	454.1	346.2	181.6	373.6	440.3	343.2	389.5	544.2	439	567.4	346.4	471.4	314.2	263.7	180.6	224.1	482.6	549	97.8	615.5	487.6	249.6	165.9	192.9	212.7	267.9	365.9
712	19.4	11.5	8.8	6.7	19.6	4.5	6.5	25	-5.2	20.2	24.6	15.3	22.6	7.4	13.4	28.5	-2.1	45.9	35.2	26.3	24.1	8.2	21.6	15.7	12.2	15.3	5.9	-29.2	13.7	-25	49.9	1.5	-14	-8.8	-17.4	33.1	-40.4	-1.9	8	39.3	11.4	37.1	-42	-2.4	3.8	16.5	-14.1	14.2	25.1
713	581.2	816.7	379.7	437.4	440.4	205.7	658.2	408.4	821.8	462	224.1	608.3	458.1	517.6	299	247.7	480.2	504.5	819.4	432.9	409	219.3	484	556.2	401.5	588.4	683.1	311.2	534.8	632.4	464.4	504.3	624	690.8	406.4	407.2	483.4	414.3	670.8	939.6	377.7	463	360.9	427.2	1200	647.2	1092.2	259.6	563.3
714	106.5	134	-26.1	48.5	35.2	49.5	39.3	64.8	25.5	3.2	-3.5	39.5	98.3	22.6	44.5	54.3	18.1	49.2	18.7	67.8	43.9	10.4	44.4	53.8	26.2	-20.2	40	23	102.6	63.5	85.9	40.3	13.7	24.1	-3.4	41.7	0.8	60.9	45.3	43.6	51.9	-12.9	26.4	37.7	84	33	66.6	9.2	70.7
715	-12.5	-32.8	-54.6	-55.4	-82	-66	31.2	104	104.1	115.6	66.8	49.2	16	31.4	-40.3	-6.3	81.3	79.1	30.6	64.3	-48.1	-86.9	-2.8	-60.9	-203.5	-137.2	70.1	-25.3	-59.1	49.8	-16.1	-23.8	-148.2	-49.2	158.7	77.8	-0.6	14.2	27.4	81.9	58.9	-86.8	108.4	117.3	124.8	55.7	148.8	35.4	108.8
716	141.9	104.6	65.8	71.4	97.7	80.9	92.6	114.2	75.4	65.5	55.4	63.5	91.2	69.7	83.7	59.5	45.5	48.9	79.3	56.3	92.9	114.4	78.7	79.8	76.4	40.8	68	56.3	102.3	65.9	85.8	131.6	106.7	75.1	147.1	136	111.2	66.7	60.9	71.9	80.1	45.9	124.9	90	45.9	87.1	67.6	60.7	48.4
717	140	205.7	207.4	112.7	140.7	153	61.9	111.1	127.5	60.5	71.5	68.9	174.8	117.8	106.1	60.4	56.6	147.1	157.1	119.2	181.7	146.4	90.3	180.5	156.3	243.8	146.5	82	124.8	147.8	128.4	151	97.4	113.9	154.6	224.4	120.8	169	217.7	83.6	142.4	138.8	110.7	188.4	150.5	248.5	134.7	60	139.8
718	83.6	171.6	98	38.8	16.9	34.7	-20.6	23.2	19.5	15.2	52.1	-31.1	298.4	-16.1	80.8	20.1	32.7	39.2	46.6	36.2	112	26.1	13.8	69.9	55.6	37.5	44.4	35.3	85.3	-105	-23.4	22.4	-49.2	27.7	-52.7	83.1	10.5	-16.5	53.2	160.9	120.3	72.7	3.6	41.7	70.7	62.5	150.6	4.2	55.3
719	45.6	59.1	73.1	52.1	88.3	11.4	32.1	13.8	-0.4	2.6	20.9	19.8	25.2	60.8	31.6	38.1	14.3	18.6	31.5	22.5	34.9	33.2	8.1	31.9	1.8	78.3	33.1	7.1	13.5	21.7	19.4	65.6	24.1	42.1	32.3	58.4	26.3	25.1	-6.2	27.9	35.8	13.1	56.3	40	7.8	5.1	51.3	4.5	9.1
720	72.2	95.4	105.8	55.2	80.5	46.3	12.6	167.7	104.4	86.9	16.9	43.1	78	36.5	40	43.2	71.7	105.9	81.6	78.7	85.9	72.8	144.7	48	-49.3	52.4	53.7	128.7	62.2	47.9	17.6	92.6	73	93.4	16.2	213.3	168.2	130.8	116.8	55.1	142.2	174.3	132.1	48.9	78.4	132	134.1	73.2	137
721	76.8	12.7	98.2	77.1	78.1	92.9	63.5	67.8	93.1	52	62	35.1	56.9	84.4	67	87.7	78.6	60.2	98.2	95.9	84	95.9	45.2	61.8	89.1	53	70.2	74.5	89.7	114.9	75.2	94.5	51.2	90.4	106.2	146.5	75	127.9	179.2	87.1	96	77.2	75.9	66.6	142.9	93.4	113.9	51.4	48.7
722	307.7	312.8	420.8	177.6	68.7	636.9	173	314.3	313.8	230.4	313.3	152.9	384.2	311.7	306.6	382.1	206.4	327	176	227.7	217.2	348.3	226.5	183.1	417.4	546.9	184.8	301.7	199.6	408.8	177.2	395.9	226.8	180.2	341	195.9	260.1	177.3	472.4	554.7	157.6	687.9	224.2	251.7	283.8	499.1	353.5	179.2	396.5
723	144.8	258.5	441.1	181.7	35.5	212.6	128.9	75.7	92.7	104.1	101.1	7.6	112.5	142.4	132.5	61	248.3	151.9	161.8	110	111.1	116.1	156.6	104.8	159.6	188.5	177.7	118.7	36.5	76.5	133.9	99.5	132	149.3	113.9	227.1	122.4	180.9	139.6	130.2	118.8	104.5	81.6	140.2	81.8	74.3	174.8	20	223.3
724	95.5	52.4	112.5	72.9	63.1	68.2	53.3	31.4	157.2	113.7	32.8	103.9	155.1	57.2	83.1	86.9	113.8	55.9	141.5	137.1	93.7	112.6	95.2	76.6	321.4	26.3	83.5	90.7	71.8	152.8	48.5	164	96.2	129.5	90.8	150.1	40.7	155.6	-2.1	143	136.1	44.3	21.8	51.9	198.5	89.6	210.8	23.7	85.3
725	-254.4	-450.8	-381.8	-293.8	-359	-252.4	-579.5	-161.5	-614.9	-140.4	-175.9	-258.7	-283.2	-512.5	-417.7	-104.7	-413.1	-378.3	-268.4	-130.3	-431.1	-304.3	-247.7	-294.1	-705.3	-521.4	-426	-457.3	-742.3	-1171	-365.8	-556.3	-350.6	-830.1	-977	-305.6	-591.6	-300	-845.7	-527.2	-403.8	-559.5	-681.4	-220.6	-351.1	-512.5	-329.8	-541.2	-177.6
726	209.1	47	56.7	102.3	223.3	115.6	155.7	124.1	33	156.3	175.4	105.4	93.7	94.8	84.3	139.1	117.7	85.5	71.2	171.3	110.3	114.4	88.7	133.8	122.2	116.1	157	128.3	138.8	161.5	165.7	58.4	89.9	128.9	220.3	103.7	120.5	221	140.3	66.9	80.4	147.1	132.8	120.8	70.8	104.2	96.1	80.9	94.6
727	-1.3	-13.5	21.3	30.5	-22.2	0.2	37.2	6.4	154.9	-7.7	-3.8	-38.7	2.2	-14.6	34	-8.6	4.8	-29.3	-6.4	-18.9	28.9	41.8	77.2	32.5	153.8	-10	-14	-4.2	-66.4	41.7	-22	-31.3	-25.5	-14.1	-93.6	-7	-40	-9.1	-0.5	3.3	-4.9	34.4	18.2	5.2	306.7	-37.4	-28.2	-1.4	44
728	-23.2	2.9	-0.6	4	-5.7	20.8	-44.1	0.3	-15	-27.8	-16.7	2	-0.6	19.3	-12.1	-14.1	-11.9	-1.2	-4.9	-0.2	-16.1	-10.3	-2.8	4.5	-7.5	32.2	-1.2	12.6	-32.7	3.6	-3.3	44.2	9.5	10	-0.6	20.9	20.3	-4.6	-20.5	-7.3	2	-11.5	12.8	16.6	-4.5	31.6	5.8	-17.7	-5.7
729	5.4	2.1	44	4	36.8	-16.2	9.8	4.7	36.1	3.9	19.6	7.3	23.5	23.6	22.4	24.3	5.6	30.5	24.4	8.5	7.9	19.3	6.7	29.3	26.1	51.5	20.6	15.4	27.1	20.7	3.4	28.2	13.9	29.5	45.8	49.3	14.3	27.7	70.8	18	24.3	10	20	19.1	157.1	44.1	16.5	4.1	12.7
730	382.1	338.1	228.8	205.6	244.1	133.7	401.6	102	258.2	258.4	226.3	258.2	194.9	239.9	220.3	144.6	182.4	167.6	121	132	199.5	260.9	252.8	215.4	441.2	285.9	301.2	163.4	349.9	172.2	185.7	355.5	272.1	341.2	556.7	122.5	219.7	102.3	207.5	193.2	177	213	197.3	141.6	844.5	180.5	174.5	214.4	135.1
731	-2.1	22.9	8.1	9.3	21.1	11.9	-1.3	56.1	-21.7	18.4	15.6	2.6	-3.7	26.7	43.7	41.3	57.9	20.1	35.4	24.5	19.8	52.6	32.3	28.5	25.8	-21.3	-5.4	14.2	-36	6.8	-7.7	30.7	24.4	3.3	-4.1	29.8	9.4	31.3	71.1	51.1	35	-18.2	13.3	8.4	121.8	14.5	-2.8	16.7	14.5
732	659.2	403.6	213.6	227.5	135.4	53.3	388.1	112.2	262.8	326.4	301.4	518.8	196.4	195.9	226.5	56	217.7	134.8	245.3	210.7	230	210.9	155.8	215.8	243.8	341.6	499.3	201.3	-112.3	33.8	193.4	248.9	173.3	392.2	657	176.9	160.1	213.9	189.2	436.2	245	236	161.5	222.3	353.5	233	214.2	406.6	210.6
733	28.7	26.2	-51.8	-16.1	-72.8	-61.4	46.6	-21.1	-62.4	-57.5	-30	-29.4	-14.8	-62.7	-8.1	-36.3	-55.7	-44.7	-42.3	-32.7	-25.6	31.3	-10.1	-24.5	-23.2	-72.5	10.6	-4.7	-33.6	-105.7	-33.9	-50.8	7.6	-62.9	-173.1	-53.9	-25.2	-70.2	-124.4	-89	-107.2	-29	-27.9	-9.2	40.7	-79.2	-33.3	-40.1	-21.5
734	11.8	145.1	94.7	167.5	35.6	63.3	-7.6	70.1	67.5	75.5	75	41.2	62.5	115.9	50	40.8	23.6	99.9	80.1	49.8	34.6	62.4	118	52.6	90.8	143.7	22.6	42.2	139.6	247.5	114.3	100	55.6	45.9	-65	99.5	92.9	67.3	87.9	98.2	94.1	154.9	114.7	83.1	112.5	54.4	88.9	92.7	66.3
735	90.4	113.5	50.8	79.6	101.6	66.2	77.4	70.6	39.3	46.5	81.2	110.4	131.7	64	61.7	47.6	106	90.7	82.2	44.6	212.7	134.3	113.7	195	132.9	123.5	86.9	169.7	224.2	61.8	120.4	127.4	50.6	212.5	153.5	21.2	86.6	53.8	98.7	100.3	238.3	40	139.5	127.5	10.2	134.8	118.5	122.9	96.3
736	480.6	238.5	187.3	87.6	304.8	103.6	139.9	140.8	59.8	106	512.9	209	220.6	125.9	224.4	166.1	103.9	71	242.7	219.1	138.5	248.3	242	231.7	140.1	194	197.8	149.6	251.2	173.5	263.1	239.1	215.2	167.6	105.5	562.1	107	110.3	115.9	161.7	142.4	199.5	195.3	157.5	125.7	63.9	114.3	156.7	105.8
737	154.6	149.1	94.8	83.8	115.6	114.5	188.3	213.3	122.8	105	147.9	87.7	136.4	129.7	158.6	62.4	93.9	138.8	124.1	39.1	130.2	82.9	132.6	193.4	157.8	221.2	171	196.1	121.5	181.6	111.3	151.2	99.7	134	195.2	85.4	139.9	126.2	217.8	138.3	69.1	178.2	120.9	106.5	155.9	118.5	70.4	125.2	131.8
738	-166.9	-10.3	11.3	9.3	-150.2	35.8	-176.3	-32.6	-31.6	-121	-76.6	-78	-11.5	-7.8	-132	-28.7	-69.6	-14.3	-55.4	-22.3	-59	22.9	-47.9	-35.9	56.1	-150.8	-129.9	13.5	-96.4	-51.6	-98.5	-147	-82.5	-48.9	-357.1	-44.5	41.2	-30.6	-71.1	-18	-86.4	0.5	-86.4	-40.7	-8.6	-22.8	-44.2	-68.2	7.6
739	298.4	148.4	128.4	101.7	95.6	91.5	269	73.4	192.6	51.3	78.5	169	105.4	152.7	116	43.1	130.8	121.6	104.4	49.9	205.6	106.9	158.9	117.4	108.6	134.5	120.2	80.9	192.7	15.3	154.3	165.9	156.6	213.1	387.1	209.8	101.9	185.8	139	129.5	175.5	111.6	200.8	68.7	144.3	53.4	103.1	146	80.4
740	-7.1	48.6	32.8	15.6	42.9	84.3	42.8	16.4	18.5	6.8	26.5	18.3	17.3	35.7	27.3	29.2	32.6	49.4	22.5	13.6	20	0.7	10.5	25.7	4.6	228.4	18	60	7.7	126.1	80.2	52.4	79.7	31.9	38.8	27.9	-19.6	68.8	46.1	18.6	61.4	13.2	31.9	14.1	46.3	47.6	46.7	15.8	32.5
741	384.4	312.4	360.8	213.5	223.2	258.3	210.2	22	348.7	292.5	309.5	410.1	301.5	253.9	13.5	153.2	346	104.3	59.2	143.5	295.2	191.4	196.4	226	740.7	237.5	239.2	294	319.2	378.8	102.3	257.3	249.8	410.5	358.5	92	322	349.5	375.5	298.2	401.2	618.5	208.4	151.7	148.6	270.5	161.6	214.6	43.4
742	102	6.9	19.8	11.4	-23.3	-11.7	32.2	38.2	20.3	13.9	-45.4	-41.6	-14.4	3.2	-3	10.8	10.9	22.8	-0.2	13	17.7	17.2	17.6	-12.5	-8.1	-18.7	32.3	-20.1	-14.1	-6.1	1.8	-10.5	35	-13.7	-20.9	40.6	28.6	-10.8	75.8	8.8	4.6	33.1	-6	14.5	9.2	-8.8	20.1	-46.4	12.1
743	87.5	25.5	61.4	18.7	41	34.7	35	33	0.1	28.1	30.8	33.3	39.4	24.2	40.2	19.3	26.4	33.2	41	36.4	25.9	31.7	37.6	44	41.6	61.6	32.1	14.6	-7.2	56.1	36.4	45	30.1	27.2	57.2	66.8	8	20.4	26.9	19.9	27.1	19.3	34.9	30.6	23	38	35.3	26.8	13.2
744	97.4	186.7	95.6	164.7	225	201.6	149.6	244.4	202.2	92.8	184.5	105.1	208.8	211.7	192.5	280.7	67.3	177.8	174.3	252.3	212.4	192.5	240.7	191.4	101	205.7	215.1	190.6	177.6	51.6	178.7	162.4	109.4	146.3	84.7	400	102.2	251.1	290.9	120.6	281	152.8	144.3	293.2	242.8	215.5	234.7	116.6	141.6
745	87.8	18.6	83.3	68.9	62	33.3	64	40	145.2	43.8	74.2	75	58.9	75.7	49	102.4	96.5	50.4	61.4	52.8	62.4	57.4	65.4	52.3	54.6	54.3	53.6	45.8	13.1	26.5	67.9	44.5	71.9	56.1	94	87.3	48.2	59.3	59.7	107.1	101	59.9	30.8	75.7	102.6	116.5	123.8	53.1	47.5
746	1135.6	1040.6	2165.3	1546.3	1919.6	1476.3	1502.7	1011.4	4961.2	1939.7	1715.9	1952.6	1875	1373	2608.6	3392.1	3261.3	879.7	871.2	2596.4	1609.5	1705.5	1729	1137.4	4247.7	1880.5	969.5	1285.3	758.6	2166.7	2233.2	1250.1	1621.1	1804	5138.1	1032.7	1257.1	1907.5	1081.8	1870.1	1679.1	1290.1	1104.1	909.3	2755.6	1184.1	1596.5	1224	1107.8
747	112.5	12.4	38.1	43.3	82.6	105.7	141.4	84	53.2	57.5	36.7	166.8	34.8	71.8	103.6	53.4	31.6	51.3	134	150.5	77.3	54.6	74.1	78.2	51.5	138.4	135	73.8	56.8	71.5	147.1	93.5	70.3	98.9	48.6	38.9	112.9	69.8	77.6	91.4	56.6	21.9	117.1	55.2	101.9	72.4	127	80	88.2
748	66.6	85	60.7	59.2	61.8	21.7	34.9	34.3	33.9	28	25.5	38.8	46.3	73.5	59.8	20.1	17.9	53.5	62.4	26.9	57.4	26.6	96.6	91.5	86.1	57.7	69.6	31.7	47.5	38.1	94.9	50.9	58.7	69.6	53.8	57.1	15.5	78.4	71.3	-2.5	53.1	131.6	41.6	78.5	33.8	61.6	40	27.3	37.3
749	99.2	41.2	39.3	26.3	52.1	59.8	55.5	49.7	16.3	52.2	105.4	44.4	32.1	52.8	32.2	52.5	41.8	19.8	40.9	49.7	15.4	43	31.9	32.1	58.7	54.6	54.4	68	103.7	41	18.3	14.4	61.4	29.3	-14.7	41.5	55.8	64.8	73.5	39.6	-40.9	25.2	60.4	59	35.2	47.3	24.6	27.1	61.6
750	207.2	6.6	28.6	-6.2	124	95	255	70.5	-24.7	-57.7	-40.8	-2.8	-2	36.3	38.4	31.2	-36.6	28.5	11.2	8.9	136.5	7.6	85	37.2	68.5	-39.7	51.3	69.3	414.3	209.5	192.7	38.8	63.1	14.6	-135.1	3.6	86.8	22.6	-30.8	69.9	-57.8	148.7	95.4	98.1	73.2	100.9	59	11.2	39.6
751	298.2	1085.1	2361.5	379.8	307.5	243.9	324	156.3	1207.6	870.1	233.3	332.5	748.6	297.3	276.8	357.6	293.4	1950.7	308.1	115.7	571.5	779.8	494.8	570.4	822.4	350.9	279	571	430.1	641.4	299.1	598.6	330	658.7	791.9	646.9	289.2	416.4	675.1	1124.9	301.8	400.9	325.3	996.7	228.5	675.9	578.4	372.1	316.4
752	-127.9	-7.3	-20	-31.9	-67.7	-3.7	-65.8	-6.1	-25.2	-8.8	-16	-41	-44	-55.8	-21.3	-3.9	-22.1	-22	-30.5	-9.4	-41.9	-19.8	-41.3	-30.4	-128.3	-108.2	-63.3	-72	-7.8	38.2	-37	-43.2	-0.3	-41.1	-191.6	-8.3	38.5	-42.7	-151.8	-9.8	-7.2	-28.1	-44.9	-10.2	-36.2	2.6	18.7	-12.5	-16.8
753	67.6	82	63.8	85.7	97.8	73.8	107.6	64.4	124.5	23.3	34.2	41.1	79	71.3	72	55.5	75.2	48.9	113.8	76	73.8	51.7	81.1	74.8	14.7	93.6	85.2	96.5	121.3	79.6	88.4	97	91.4	101.5	-142.2	125.2	36.5	90.5	97.3	48.1	96.5	117.6	106.6	102.1	166.2	58.4	72.5	56.9	47.4
754	856.1	374.8	523.9	654.7	468.2	444.6	542.3	379.4	225.3	359.4	696.3	365.4	482	534.9	462	286	443.5	511.5	398.7	324.5	616.7	480.5	658.2	428.4	431	475.2	368.6	563.7	334.5	487.4	498.6	780.3	265	524.8	682.1	418.1	198.9	423.8	447.5	212.6	447.5	501	316.3	257.1	152.4	538	330.6	338.3	361.7
755	-45.6	-154.1	-84.6	-72.9	-154.3	-110.8	-176.8	27.9	-218.7	-24.4	-67.7	-64.3	-63.5	-114.4	-89.7	-67.5	-63.7	-66.7	-128.3	-70.9	-116.1	-53.8	-45.5	-45.9	-31.7	-94.6	-34.9	-62.3	-20.5	-385.9	-128.2	-181.1	-51.4	-181.9	-347.1	-71.6	-202	-190.5	-357.4	-168.9	-143.3	26	-168.2	-53	-16.1	-38.8	-61.5	-183.4	-118.3
756	-2.3	10.7	-6	46.3	3.5	0.5	5.5	22.5	7.4	9.7	28.5	-8.8	8.9	17.4	10.8	62.5	2	37.6	25.6	49.8	-5.5	2	6.2	5.1	21.1	17.2	-3.2	6.6	-15	-4.6	-16.9	-3.1	-16.6	16.7	-43.5	19.4	14.5	47.4	16.3	8.8	33.5	-0.2	8.9	5	96	9.6	19.8	-5.4	5.7
757	177.5	117.3	72.6	46.7	90.6	107.6	-16.2	38.1	145	40.2	81.4	87.2	54.8	93.6	25.8	56	107.3	72	79.1	52.4	99.9	48.2	48.9	41.6	144.9	66	92.5	96.5	231.1	225.9	36.5	89.7	83.3	83.5	114.5	73.2	163.3	83.3	133.7	163.2	106.9	102.3	35	90.8	150.8	151.5	102.3	56.3	74.2
758	-37	-22.6	-19.6	31.7	38.3	-10	-15.7	-37.8	-50.6	-2.9	9	-5.9	-34.6	-7.7	-10	-1.7	-20.8	3.2	1.6	-10.6	-65.2	-22.6	4.4	5.8	-33.4	-42.7	51	-38.5	-32.9	31.2	-22.9	35.8	-21.3	-98	20.2	-5.1	22.4	-45.7	6.5	-2	0.4	31.1	16.2	-0.7	-9.9	-7.4	-15.9	-119.5	-63.8
759	62.1	79.9	61.3	100.2	113.6	69.4	53.2	90	93.9	92.7	47.5	47.3	91.4	44.8	73.9	83.2	47.6	85.3	96.9	102.1	43.6	43.8	50.5	65.9	70.8	89.3	48.1	59.6	130.2	43.9	45.5	79.2	80.9	66.3	188.4	158.4	106.6	130.7	82.5	84	144.8	124.3	81.7	59.6	70.4	101.7	99.6	72	63.3
760	94.1	74.2	117.7	28.8	212.7	97.4	335.2	553	34.1	197.2	749.3	74.4	550.7	182.1	149.2	15.1	284.8	180.8	89.1	243.1	131.1	80.8	141.8	74.2	164.8	524.9	292.9	288.1	-13.9	35.3	125.2	294.3	42.4	459.1	-10.5	54	-0.4	164.7	209.3	30.1	138.7	166.3	35	157	142.3	78.8	29	175.2	41.9
761	-33	-38.1	4.8	20.9	-25.9	-4.5	23.1	-2.3	12.2	-14.4	-10.2	1.5	-1.3	10.7	-31.6	5.6	8.3	-3.4	-12.7	6.2	-18	-15.2	16.2	-0.4	-53.1	-53.8	-10	-15.8	6.3	-40	10.1	9.4	-27.2	-59.7	-74.8	0.1	13.3	-16.1	-51.3	-18.5	11.7	12.3	-27.9	-23.3	-6	-18.3	6.1	-23.6	-6.4
762	5.1	21.1	7.9	12.7	4	16.1	0.6	16.9	28.2	45.1	37.9	34.5	13.3	15.3	25.2	46.7	18.7	92.2	56.7	25.9	-3.1	7.6	14.7	5.5	-5.9	-75.4	26.7	-7.1	77.8	11.5	41.1	9.5	24.8	6.3	-85.3	40.8	-42.4	-7.1	42.1	-1	17.2	-4	30	289.4	77.7	10.7	25.8	17.1	40.6
763	171.6	47.8	81.8	147.1	105.9	161.7	273.6	118.3	226.4	100	206.6	210	151.2	99.4	178.4	50.4	164.1	111	90.1	103.2	150.7	151.5	160.8	116.8	164.2	216.4	173.3	178.3	141.8	123.9	177.7	187.6	102.5	161.4	428	195.4	116.4	193.8	92.5	190.5	201.4	102.4	140	131.2	175.9	67	118.6	179.2	112.4
764	-430.4	31	-89.3	-118.5	-402.5	-254.1	-637.1	-77.8	-12.1	-257.5	-313.8	-370.4	-54.9	-194	-212.6	-35.5	-133.1	-50.1	-95.8	-71.5	-441.7	-63.3	-207.2	-57.4	-93.9	-178	-192	-279.7	-263.1	-401.5	-187.1	-329.2	-203.3	-249.6	-615.1	18.4	-224.8	-367.1	-104.5	-49.2	-242.1	-156.9	-279.3	-116.6	-99.9	-181.6	-63.5	-204.7	-88.6
765	8.7	29	5.2	14.3	-0.9	31.9	26.4	22.8	42.5	19.7	1	13.9	11.3	17.9	-8.4	13.1	59.7	21.7	35.7	-1.5	2.9	-9.1	26.4	4.5	50.5	28.9	30.3	0.2	-1.8	-56.3	1.4	37.1	37.7	33.3	6.8	12.3	49.6	21.5	29.7	9.6	6.9	12.1	23.1	20.5	16.8	-9.3	-6.6	-3.3	16.4
766	49.9	56.3	39	23.4	40.8	0.9	29.7	26	26.2	26.6	22.9	13.5	21.3	33.5	4.5	3.6	42.9	7	22.9	13.2	23	6.7	22	30.7	91.8	63.3	15.9	37.2	91.7	48.1	34.9	44	48	46.9	78.5	33.5	6.2	37.8	35.4	68.7	38.9	-18.2	48.5	11.1	-23.5	62	30.5	19.2	23.3
767	218	101.4	72.9	44.5	15.5	86.9	156.7	68.9	10	51.5	83.2	113.5	56.5	53.2	94.6	45.8	73.5	9.4	10.9	17	128.4	67.4	64.6	48.2	70.4	137.8	114.2	57.1	91.8	54.8	72	63.3	97.6	118.4	118.2	52.2	-2.7	23.9	49.7	49.7	72.8	107.2	84.2	16.5	52.7	53.4	53.1	68.1	36.3
768	164.3	251.7	131.7	137.1	122.7	415.2	250.9	97.4	430.8	134.2	223	303.3	216.7	144.3	175.1	125.9	377.5	165.5	96.4	124.9	204.4	194.8	83.5	184.8	118.6	337.8	261.8	292.1	241.5	711.3	48.6	53.2	145	138.3	177.9	145.4	253.4	112.5	258.2	286.2	125	579.8	90.1	163.3	342.8	317	196.6	259.2	151.2
769	-5.3	-66.2	2.5	-54.2	-94.7	-76.3	-58.6	-41.5	-38.5	-58.3	-67.6	-53.1	-34	-32.6	-38.7	-36.2	-56.7	-61.9	-54	-35.8	0.1	-16.1	-36.5	-34	-34.7	-37.6	-41.8	-67.4	14.2	-67.6	-45.2	-82.1	-53.8	-33.6	-83	-48.3	-0.7	-42.3	-68	-23.3	-22.4	-60.6	-21.7	-37.3	2	-45.2	-21.5	-32.6	-44.7
770	364.3	638.3	748.1	457.9	277	341.5	216.8	345.6	326.2	75.2	324.5	271.7	313.5	400.7	188.2	810.9	322.6	594.6	225.6	127.7	384.4	483.9	451.9	281.6	605.5	315.4	306.7	390.7	504.9	326.7	260.6	296.6	273.7	911.6	7.1	547	344	245.9	333.9	283	242.2	582.1	234.7	178.9	253	689.1	235.2	250.8	237.6
771	64.9	78.9	148.3	67.2	-20.9	50.7	53.7	34.3	69.8	15.5	40.5	13.1	231.1	37.7	105.5	7.5	69.8	30.2	45.8	6.5	198.6	183.2	86.9	189.6	105.2	75.9	86.4	148.6	74.9	224.3	95.1	54.6	64.6	166.3	43.6	20.9	10.2	8.8	69.1	85.5	114.5	121.1	62.6	161.4	80.3	74.8	60.7	78.2	57.2
772	-45.3	2.6	17.4	9.1	27.4	36.6	13.3	14.9	34.5	6.8	16.3	46.8	11.4	20.2	2.1	6.5	-8.5	11.8	14.1	1.6	36	26.2	13.3	22.3	-30.1	83.2	38.6	-5.2	42.1	6.8	47.8	30.7	44	51.8	22.6	12.6	13	-0.1	28.1	41.9	1.2	-5.1	89.8	12.5	37.7	-3.3	9	-3.1	6.3
773	121.4	-28.2	10.8	-4	2	-1.3	20.1	-8.6	30.8	7.8	-8.8	7.4	19.3	4.5	-16.7	7.6	-5.9	-11.7	7.4	5.9	45.9	12.1	16.4	8.1	-17	38.9	5.3	-12.5	58.3	67.4	19.2	14.5	10.8	95.6	-11.9	22.7	62.8	38.1	19.1	11.7	-7	55.8	33.6	11.1	58.1	-14	16	13	-4.4
774	439.3	867.7	496.6	437.3	445.2	464.7	290.2	333.4	869.6	626.1	219.3	481.5	560.4	577.9	517.2	1274.5	643.6	198.3	356.8	649	576.4	414.9	367.4	593.4	696.4	585.2	375.5	382.7	419.1	490.6	706	499	456.6	537.3	741.1	519	568.3	162.9	428.2	343	531.9	343.1	495.7	337.7	1163.1	301.5	517.4	386.4	115.1
775	19.4	72	115.2	68.5	38.7	8	4.2	21	57.3	23.2	81.4	42.5	65.7	7.6	8.7	73.9	6.5	54.3	67.6	14.4	26	21.8	56.8	53	-5	41.1	27.9	49.5	31.8	13.1	46.6	48.9	129.6	69	-43.6	34	121.4	47	38.6	-35	-2.3	57	26.4	58.1	104.4	71.5	50.6	91.5	56.5
776	27.6	15.2	41.5	12.1	15.8	66.3	37.2	15.6	31.6	13.6	-2.7	15.1	26.3	28	19	12.9	6.3	15.2	27.9	21.6	17.8	22.8	23.1	25.8	19.5	44.6	23.5	36.8	-59.9	-5.3	16.8	34.3	29.2	17.7	-13	31.3	48.6	24	44.8	34.7	17.7	12.7	12.4	18.8	16.6	48.9	25.9	24.9	22.7
777	-10.2	-58.1	-0.8	-4.3	10.3	14.1	6.7	-8.4	-7.7	-15.3	-8.9	8.3	-8.7	4.1	-12.6	-7.2	-11.8	4.7	-15.1	1	-29.5	3.2	-23.1	-2.2	-38.8	61.6	13.9	-18.7	-15.4	71.8	-2	-11.5	1.9	10.8	64	-0.6	-4.3	-10.1	18.4	-21	-12.8	29.6	-1.6	-13.7	-32.4	-17.3	-6.8	-6.7	-12.6
778	108.9	534.6	373.7	117.6	125.8	289	231.4	253.5	157.7	248.5	330.6	393	110.7	100.5	70.4	266	171.7	579.4	222	268.2	97.6	206.2	193.1	155.8	152.6	55.2	51.9	130.9	152.6	125.3	90.2	263.1	158.2	102.8	321.8	312.8	162.2	355.4	178	319	149.8	277.5	160	207.4	300.5	337.7	194.5	209.4	275.9
779	367.8	469.3	487.5	267.5	259.7	268.5	415.3	217.3	350.5	517.6	322.9	258.8	418.5	304.7	234.7	274.4	302.7	527	666.6	585.5	368.8	298.3	199.3	232	310.5	326.8	250.4	232.4	202.5	174.7	213.2	482.9	271.1	445.2	385.4	429.5	276	277.7	288.3	335	542.2	252.7	335.5	290.2	434.9	362.8	376.9	333.9	209.7
780	42.6	18.3	-14.9	0.2	14	128.4	-14.6	22	-81	13	-18.7	2.2	9.6	23.6	14.5	-19.3	-61.8	8	-13.7	10	46.5	13.6	193.1	34.2	-13.2	6.5	17	6	12.7	13.6	42.2	50.4	-17	-20.4	223.5	36.2	-45.4	37.3	9	15.6	-7.6	-42	57.2	45.3	-6.1	-10.4	-35	-1.2	19.5
781	237.8	478.1	888.3	809.5	640.8	614.1	247.7	644.7	510.6	692.5	954.8	429.4	984.7	572.4	1012.8	841.7	1132.6	816.2	610.3	793.9	557.6	1035.7	694.8	481.8	1182.1	644	419.3	725.9	347.7	516.3	701.8	474.1	153.4	506.9	436.5	1406.8	388.5	574.5	963.2	517.9	1052.5	666.2	444.7	712.4	940.6	730.6	313.9	566.3	323.4
782	-10.1	-16.3	-4.4	-8.9	35.9	3.1	9.1	-11	37.4	-19.1	-31.4	-23.7	2.6	21.1	-20.6	-11.1	40.9	6.8	-16.2	-6.6	7.2	-4.5	-24.2	-2.3	-22.7	57.1	-14.7	-25.4	-39	76.6	16.2	18.4	-20.4	13	-51.9	-5.4	18.8	7.1	0.1	-2.1	0.3	30.2	32.7	20.4	-50.2	9.4	-35	-17.9	-12.5
783	156.3	144.5	86.1	116.7	122.5	93.7	108.9	135	262.7	55.8	135	127.9	149.2	94.5	122	90.9	102.7	156.3	149.4	97.3	141.6	130.6	156.6	86.6	113.4	183	80.4	286.1	213.9	209.6	103.4	84.3	112.8	184.6	106.3	111.1	149.7	178.7	275.2	251.1	241.4	169.6	96.2	213.4	89.9	152.7	189.1	277.1	150.3
784	1177.7	575.1	1262.6	411.5	879	3658.1	1559.9	3398.2	2439.3	1073.9	53.3	1462.3	573.4	1037.3	2791.4	561.9	547.1	1453.2	236.1	2179.6	1143.1	155.5	1479.5	879.8	720.7	62.9	1095.1	829.2	1276.7	215.2	1910.2	1994.1	4371.9	1448.1	965.4	1737.1	3338.7	63.4	329.1	1537.7	32.2	959.9	2976.6	383.7	3281.7	-5	3995.7	2303.2	3921.9
785	-98.3	16.3	-7.4	-6.8	3.2	54.2	8.8	21	-19	59.5	1.4	28.7	-18.5	16.3	39.7	-28.2	-26	68.2	36.6	17.5	6.9	22.9	14.5	16.9	-63.7	-8.7	51.4	2.8	-32.7	-123.5	-0.7	41.7	42.5	62.5	37	44.5	35.4	-2.8	5.6	-29.2	21.7	7.4	13.4	23.9	16.6	44.6	39	-9	6.6
786	85.7	4.2	40.5	-27	-2.7	-2.6	32.9	91.8	67.8	2796.4	50.5	2280.3	30	13.2	75.5	94.8	39.3	65.3	132.7	22.8	7	32.7	1.6	13.3	-11.1	-42.5	20.3	39.5	62.8	65.7	20.7	-30.6	179.7	12.6	614.2	-35.1	66.7	72.9	75	-1.7	40.1	60.3	119.1	31.8	31.3	18.9	59.1	2453.6	102.7
787	114.9	27.8	68.3	118.7	-100.9	-87	151.2	-46.8	35.7	33.7	-91	29.4	-106.4	127.7	135	-49.3	-29.4	23.9	143.9	8.2	116.8	78	145	92.9	-149.2	-180.8	125.3	28.3	-266	2.1	1.6	-144.7	48.6	143.3	237.4	81.7	-29.6	127.6	76.5	-219.5	54.4	-192.9	-21.7	-85.3	-18.4	-147	123.8	22	56.9
788	66.5	44.7	21.9	26.5	39	23.5	23.7	19.5	35	12.1	32.4	20.5	23	6.1	13.7	5.6	19.2	16.3	12.7	8.9	12.5	12.1	21.4	17	78.3	90.4	55.4	34	17.8	72.4	35.8	39.5	31.6	41.7	10.3	0	53.4	20.4	70.2	50.9	22.3	55.3	27.5	24.9	60.5	25.4	28.3	31	16
789	806	150.4	236.8	199.9	697.6	130.6	675.4	171	161.7	302.9	287.6	260.6	344.5	334.4	375.5	88.6	305	104	108.2	237.9	366.8	347.3	316.5	300.2	269.9	429.7	429.1	242.3	375.2	409	578.9	344.9	459.2	354.8	760.7	405.4	145	256.3	152.9	244	247.9	194.2	657.8	542.9	358	132.6	113.8	227.8	192.2
790	-55.8	-33	-19.6	-20.8	-39.5	-23.9	-50	-14	-25.2	-7.9	-16.1	-19.8	-24.3	-37	21.4	-7.9	-4.4	-17.4	-5.2	-7	-27.4	-25.6	-15.1	-18.7	-42.8	7.6	-24.8	-39.6	61.3	26.8	-77.1	-29.6	-16.4	-28.4	-65.8	2.3	-23.1	-21	1.4	-18.3	-20.2	-52.8	-19.6	27.6	-51.2	-52.3	-24.4	-36	-15.2
791	171.3	296.5	232.2	263.9	158.2	335.5	213.6	385.2	201.2	390.1	358.6	352.5	325.2	195.5	305.3	299.8	258.9	336.9	359.5	290.1	265	242.8	141.7	288.9	199.9	300.8	140.4	199.5	145.8	201	153.2	146.8	220.6	145.8	250.4	278.1	152.6	438.2	316.9	156.6	419.5	104.2	203.5	322	150.9	303.1	266.5	324.8	600.3
792	27.6	56.7	30	15.7	19.1	18.5	19.7	35.5	14.9	24.2	28.7	35.7	40.5	22.5	36.4	58.3	22.3	30.8	37.1	38.3	9.4	20.3	19.1	19	59.2	11.1	20.2	25.8	30.8	-0.1	13.9	21.9	0.3	24.5	48.5	32.7	46.5	28.1	97.3	12.5	39.4	-9.8	41.5	47.7	57.9	42.5	37.1	19.5	12.8
793	27.9	35.3	18	45.9	49.5	83.9	36	52.4	27.2	31.3	88.8	47.1	38.6	86.7	48	4.6	6.3	28	-7.5	10.1	51.9	24.2	52.6	28.2	34.1	228.8	38.3	28.2	96.4	22.9	-20.7	52.9	1.8	96	72.5	117.5	62.2	55.3	29	30.5	62.2	87.7	58	34.3	1.4	149.4	-2.8	51.7	24.6
794	237.6	546.4	832.5	502.6	389.5	362.7	194.9	306.9	1036.8	215.1	416.9	245.1	682.8	333.7	352.6	637.5	791.8	433.4	336.3	422	369.4	437	400.2	312.7	1048	677.3	175.8	331.4	406.9	486	275.3	566.7	278	613.8	579.1	766.1	360	262.4	473.4	348	968.3	466	204.6	411.1	713.9	408.5	603.8	224.8	198.9
795	346.6	168.4	120.3	157.3	111.7	94.9	103.9	105.9	291.5	70.1	197.4	99.8	187.5	118.2	226.4	120.8	506.8	85.9	56.6	105.7	198.3	306.9	165.7	134.2	112	224.4	174.6	96.6	196	80.5	79.8	183.2	147.4	173.7	235.3	154.6	104	262.9	105	57.1	267.5	193.3	92.7	168.6	264.1	112.6	124.9	192.1	118.2
796	-22.4	-45.3	-8.4	-12	12.8	-18.3	7.6	13.1	29.4	5.7	-33.4	-38.4	29.8	10.1	16.3	5.7	9.9	-4.2	-16.4	9.5	-42	-2.8	2.5	18.4	-21.5	-14.4	-20.4	-9.2	114.8	-58.9	-20.4	5.2	22	-15.3	5.7	5.1	-69.7	-6	-2.6	29.8	38.7	24.2	-34.1	4.9	30.9	-3.6	9	-5	-18.3
797	144.5	795.1	812.1	559.6	386.9	196	673.2	2233.8	-2.7	865.3	514.7	282.4	305	896.6	546.7	83	61.8	1607.7	128.4	56.1	312.4	301.3	371.6	1105.3	106.7	145.5	291.5	1228.4	1871.6	257.8	242.8	504.8	248.4	629.9	-65	381.9	140.4	217.7	583.3	79.7	632.6	3551.4	454.9	767.3	54.4	1837.2	133.8	484.2	1006.6
798	1363.9	1476.3	833.5	979.1	412.7	847	743.5	721.4	618	673.2	1435.6	1196.2	786.8	1011.6	1154.9	1739.1	1261.8	564.2	568.7	813.5	854.9	883.6	810.7	585.3	1743.6	1386.6	798.3	1208.7	908.7	1871.3	789	664.4	492.4	621.7	633.6	402.2	635.9	517.6	640.4	608.4	607.1	875.1	473.7	698.3	1066.4	1089.8	1026.9	706.9	473
799	647.2	305.8	245.9	206.1	445.8	176	490.7	243.6	263.4	124.5	249.6	361.5	417.9	510.8	179.7	123.4	193.5	161.5	251.8	209.7	455.5	386.1	447.5	341.5	533.1	406.2	241	398.4	368.9	553.8	319.3	393.6	462.3	820.8	652	245.8	471	394.6	344.2	369.1	234.3	410.2	548.3	306.6	345	377.4	296.4	516.8	335.8
800	56.3	21.8	38.2	29.3	69.6	63.6	97.8	47.6	151.3	36.9	90.4	36	109.8	69.5	62.7	41.6	145.4	24.7	50	30.3	113.3	36.1	68	35.1	105.4	52.5	107	68.3	50.8	117.1	74.6	28.6	148.2	64.7	-11	14.3	68.9	8.1	28.7	51.7	25.2	111.4	47.9	30.7	73.8	30.6	52.9	91	60.8
801	-43.7	-17.1	17.6	-13.1	-32.3	-10.3	-20.3	-1.3	-39	-37.4	-12.6	-47.6	13.1	-13.9	-6.6	8.7	-56.2	-11.4	-16.7	-14.4	-12.7	6.8	-24.9	-5.7	-47.5	-40.4	-13.8	44.7	-57.7	-87.2	-37.2	-17.8	-50.4	-5.7	-133.4	-31.7	-99.3	-15.7	-3.3	-24.1	-20.4	-34.4	-52	-17.9	-54.9	-41.8	16.4	-7.4	-18.8
802	206.2	155.5	188.5	147.9	50.7	84.6	166.1	44.8	163.9	58.8	124.2	85.8	141.4	58.6	85.4	49.1	122.2	71.1	76.9	35.3	168.3	109.6	110.4	97.1	233.6	164	106.4	128.9	134.1	170.2	101.7	120.8	95.4	129.4	114.7	137	175.6	100.9	270.6	167.2	141.4	214.7	124.3	98.9	259.6	70.9	155.6	137.6	78.1
803	-143.7	-174.4	-44.7	-146.6	-171.4	-53.3	-250.2	-53.4	-30.9	-24.3	-70.2	-49.6	-25.7	-176.7	-83.4	-11.7	-32	-42.4	-33.3	-20.6	-80.2	-39.9	-140.8	-43.8	-82	-209	-69.7	-30.9	-80.8	-465.8	-174	-132.6	-36.4	-268.2	-448.9	-54.5	-75.1	-86.6	-135.9	-67.9	-48.8	-178.7	-75.7	-88.1	-22.5	-25	29	-82.7	-46.7
804	141.5	360	349.5	163.8	317.7	307.9	82.9	126.3	1145.6	160.3	402	149.4	264.7	430.9	237.1	117.4	743.9	415.8	567.9	169.1	318.8	307.2	249.3	267.9	1190.7	237.6	237.1	277.9	297.2	171.5	323.6	210.4	189	250.5	608.8	415.9	211.3	268	589.3	268.2	812.4	361.2	191.5	181	556.9	527.8	326.9	144.6	333.5
805	63.5	356.1	327.8	125.5	-237.6	1004.2	-71.3	140.8	1845.5	261.5	986.2	234.2	350.2	491.5	-59.1	558.5	5926	355	341.6	222.2	163	213.6	131	146	-251.7	968.7	62.6	192.1	-124.8	-166	303.7	152.1	164.6	-205	-484.5	110.3	-192.9	166.2	170.1	100.1	503.3	241.2	-252.7	177.1	361.9	164.9	150.1	149.1	343.6
806	635.2	995.5	646.9	532.2	797.8	1484.3	894.9	547.2	898.8	598.7	632.3	764.7	675.9	867.5	911.9	241.3	752.5	631.2	416.1	451.9	855.6	714.2	795.4	610.1	1261.6	403.4	855.9	1363.7	1178.8	648.5	719.3	735.2	931.6	751	716.2	552.5	646.9	720	1671.5	593.7	608.6	1011.4	1096.4	525.4	707.7	842.3	735.9	764	807.9
807	18.5	9.6	-0.4	9.5	-45	10.7	37.1	26.1	61	-59.2	-80.5	-75.6	8.5	15.7	-6.8	-25.4	-187.5	-20.4	-48.4	2	-24.1	14.6	48.9	-5	12.5	27.2	39	14	-23	-60.4	47.5	26.7	61.4	70.6	19	15.6	-14.8	41.3	61.8	32.3	-124.6	59.7	-22	18.8	71.2	-90	-0.9	-144.4	-9.5
808	309	159.8	137	157.8	235.8	119.6	316.4	112.7	165.1	252.3	403.6	240.5	139.8	139.8	186.6	80.8	142.5	144.2	132.7	104.6	232.4	378.4	265.7	139.1	246.7	140.4	439.6	213.7	251.8	254.1	122.3	123.6	155.4	199.9	311.2	96.1	84.2	140.5	162.1	158.4	115.5	176.5	154.7	145.3	186.8	138.2	131	183.4	170.1
809	22.2	59.9	4.1	28.7	77.9	-23.8	28.5	63.4	-30.9	-25.8	29.1	9.3	27	11.5	118.2	-25.6	-57.6	-21.3	5.4	-19.6	26.5	25.7	-17	43.1	-28.8	38.9	29.5	-22.4	60.8	93.6	59.6	95.4	30.2	74.7	-55.5	54.9	27.5	-38.5	67.7	35.4	-9.8	-11.2	77	11.6	8.8	103.9	6.5	72.6	-31.4
810	148.1	129.6	570.3	236.8	83.2	95.4	64.5	138.6	332.2	84.9	-14.1	102.5	98.9	146	234.3	77.8	142.4	201.2	175.8	466.1	57.5	93.5	114	117	170.9	202.5	53.1	183.3	184	543.7	82	178.1	239.5	122.9	458.7	135.8	224.1	531.5	442.3	287.9	185.6	208.2	122.5	103.1	172.9	263.6	296.8	84.1	171.4
811	-32	-3.6	-20.9	-9.1	-2.1	-47.1	-47.2	-14.6	-0.1	-43.2	-98.5	-84.2	-22.4	-69.3	-11.6	-15.5	-86	-28	-23.3	-31.3	-8.7	-13	-8.8	-13.8	19.9	37.1	-31.9	-1.2	-26.8	-34.7	-25.6	-22.3	16.6	-24.9	-140.1	9.7	-48.9	-35.6	-86	-54.2	-70.9	-39.5	-8.3	-11.1	-14.6	2.5	24.6	-89.3	-14.9
812	6384.5	5042.8	4431.3	3971.5	8805.3	3539.5	6266.6	3338.1	6676.4	8481.3	6002.4	7964.7	5302.2	4489.6	5962	9065.9	8141.3	2852.2	3506.2	4480	3925.8	3259.1	3668.3	4323.4	12174	5847.2	3416.5	5409.7	5722.7	6386.4	9560.1	6011.9	3831	5107	14448	5357.9	2476.9	5630.2	2566.9	11225	4869	1886.4	4987.4	4363.7	8941	4884.7	6923.5	5658.7	3147.1
813	16.3	98.3	104.1	134.7	47	111.3	69.8	51.4	18.6	50.8	118.7	59.6	122	59.2	103.6	54.9	158.9	61.7	95.1	82.4	120.8	113.1	64.7	60.6	202.3	138.8	58.3	169.9	170.8	26.5	29.5	106.8	3.5	25.5	94.5	3	25.7	66.9	193.5	125.1	88.3	47.8	89.4	55.5	142.4	92.7	69.4	123.7	63.1
814	105.5	58.1	71	72.1	131.5	61.2	121.3	58.2	85.8	39.5	73.5	46.3	120.8	100	141.2	17.3	74.7	59.4	95.3	160.3	62.6	60.9	62.9	82.7	132.2	82.2	79.4	90	163.2	148.6	48.7	97.7	24.8	73.8	336.3	15.5	20.7	50.7	399.2	92.7	49.9	113.6	95.3	59	158.6	74.4	87.1	114.3	69.8
815	284.8	279.6	230.5	891.7	1007.1	415.7	507.6	307.2	225.1	147.9	44.4	244.3	534.3	576.2	432.4	461.3	179.4	224.7	300.7	857.5	460.4	507.6	447.7	560.5	435.7	264.5	359.7	419.7	273.9	323.8	371.7	565	420.3	305.9	490.3	460.2	410.9	323.8	363.8	303.6	343.6	135	450.8	500.2	518	442.1	241.3	170.5	445
816	518.2	471.3	677.9	735.5	219.7	333.1	203.1	172	382.5	798	743.8	806.9	280.2	394.3	273.7	476.2	1409.9	331.4	297.7	391.1	291.5	293.8	360.2	287.4	206.8	436.5	263.5	181.1	166.2	246.6	255.2	458.3	337.3	389	883.5	322.5	164	463.9	276.1	195.4	421	130	146.9	308.1	412.3	454.1	222.4	282.6	253.5
817	250.9	263.4	449.7	314.3	152.6	252.8	331.8	376.2	224.2	235.9	191.4	252.5	639.1	364.8	226	177.9	384	283.8	271.9	97.7	761	542.9	391.3	574.6	579.2	446.1	254	895	564	874.2	403.3	178.1	335.3	820.8	254.4	189.4	327.6	357.9	593.9	330	864.8	653.3	496.4	332.9	298.9	338.3	733.8	839.8	313.3
818	92	64.8	172.2	33.7	58.8	65.1	68.1	139.7	38.5	39.9	71.6	16.7	108.6	81.6	68.7	46.1	33.9	66.2	56.8	30.5	92.3	42.5	62.9	73.7	64.5	207.8	93.1	80.3	65.4	72.5	58.2	83.3	74	113.4	82.6	134.7	40.5	85.4	113.4	81.5	118.3	19.9	73.5	157.7	36.2	144.4	6.7	48.1	53.6
819	98.2	78.3	39.4	54.7	48.8	76	51	38.6	85.5	61.3	40.8	48.8	69.8	69.4	59.3	3	64.8	56.1	33.5	31.1	83.8	49.2	75.8	63.8	92.2	105.4	72.1	69.9	169.5	28.1	65.8	38.3	68.6	102.2	212.7	70.2	59.2	83.2	111.5	14.8	60.9	6.8	100.9	44.3	106.5	14.6	18.8	41.2	38.1
820	66.9	28.6	77.2	28.8	39	31	87.9	68.5	44.2	20.5	6.4	31.8	64.1	45.1	104.6	40.2	3.7	23.7	82	121.4	61.8	28.8	37.3	35.5	7.9	130.6	37.7	43.2	40.3	-3.3	85.2	45.4	44.2	59.8	57.1	25.1	70	39.5	38.4	33.9	43.8	3.9	34.4	38	33	43.3	4.3	30	22.1
821	236	238	203.2	131	177	171.9	191.9	143	186.6	144.6	125.1	232.1	153.8	202	154	89	146.6	205.6	83.4	83.6	228.8	100.2	223.7	165.3	177.5	145.6	178.3	193.4	290.2	225.4	142.2	146.5	169.6	320.5	191.8	117.4	180.7	109.4	175	202.7	119.5	163.6	300.1	149.8	138.3	282.9	83.7	274	256.8
822	-520.8	-153.8	-151.2	-187.6	-91	-123.9	-459.4	-11.9	-65.1	-158.2	-195.1	-333.9	-168.2	-163.9	-49.5	-3.7	-180.8	-80.1	-89	-90.7	-278.4	-71.5	-210.4	-194.1	-624	-94.9	-289.1	-255.9	-210.4	-282.6	-298.2	-160.6	-119.4	-350.3	-362.1	-159.8	-306.2	-134	-377.3	-252.6	-57.8	-139.1	-159.1	-177	-185.4	-34.5	-67	-243.6	-99
823	-904.1	-560.9	-263.5	-84.5	-403	-795.5	-450.7	-178.7	-310	-241.8	-95.6	-123.6	-276.3	-342.4	-237.6	-108	-124.3	-122.5	-220.7	-182.8	-707.8	-233.5	-514.5	-181.5	-610.2	-1009	-316.8	-393.2	-612.2	-1076	-356.3	-337.2	-307.8	-472.3	-710.7	-238.2	-498.5	-313	-582.6	-367	-549.8	-1079	-454.7	-229.1	-346.3	-340.6	-228.3	-177.8	-411.7
824	271	82.7	89.1	160.6	270.8	145.1	276.9	159.6	172.8	130.3	214	246.7	202.5	173.9	208.9	49.6	111.5	92.9	51.2	125	283.9	216.5	231.8	170.4	53.3	104.9	136.2	148.3	273.3	150.4	221.9	201.3	252.2	229.2	92.2	208.9	163.9	123.3	184.8	144.5	90.6	148.1	230.2	72.8	130.7	109	178.7	194.9	260
825	-296.1	4.7	-63.7	-34.8	-135.9	-68.6	-206.2	-30.8	-33.5	-17.9	-45.9	-77.1	-30.9	-74.2	-27.3	-28.6	-51.1	-20	-27.5	-32.3	-71.8	-34.5	-17	-40.6	-134.3	-118.2	-25.2	-54.2	-121.9	-205.3	-115.2	-92.7	-127.5	-113.3	-233	-97.9	-111.4	-109.7	-230.3	-70.2	-217.1	-39.5	-137.9	-19.6	-17.4	-50	-13.9	-74.8	-20.7
826	-288.5	-83.5	-114.8	-116.6	-170.9	13.8	-208.4	-27.6	-215.2	-6	-184.6	-55.2	-25.8	-80.8	-98.2	-92.3	-138.8	7.6	-88.1	-14.3	-107.2	-112.3	-160	-13.3	-442.8	-287.1	-129	-27.6	-217.9	-613.7	-81.5	-124.4	-74.7	-183.9	-347	-94.1	-77.5	-125.4	-299.3	-311	-109.5	-217.2	-236.2	-169.4	-192	-83.1	-163.9	-20.1	-23
827	16.1	-84.5	-99.8	-28.3	-97.9	-51.4	-58.3	-82.3	-38.9	-71.7	-65	-93.6	-55.9	-92.1	-26.2	-31.1	-94.7	-34.6	-73.4	-54.9	-85.9	-13.3	-38.7	-55.5	-136	-128	-29.8	-104.5	-177.7	-85.1	-66.8	-102.2	-98.9	0.8	-114.9	-78.5	-153.6	-210.7	-195.7	-4.7	-36.2	-148.4	-87	-71.1	-16.6	-113.6	8.6	-116.8	-62.5
828	-203	-92.5	-133.5	-157.9	-260.8	-212.7	-111.1	-131.7	-238	-84.5	-124.7	-167.8	-127.7	-241.1	-101.6	-134.8	-169.3	-59.5	-55.4	-43.5	-197.8	-110.1	-76.1	-100.9	-73.6	-269.7	-167.5	-191	-237.6	-608.8	-262.9	-204	-200.5	-427.7	-744.7	-290.4	-224.8	-189.1	-446.9	-129.1	-361.2	-254.1	-139.1	-211.3	-242.4	-264.4	-144	-130.1	-53
829	-118.5	-78.9	-87.1	-94.7	-142.3	-84.7	-131.3	-73.7	-141.1	-62.7	-69.3	-38.4	-95.9	-109	-90.4	-78.3	-96.6	-70.4	-73.6	-48.2	-129.7	-89.3	-87.7	-64.2	-182.6	-160.3	-99	-92.6	-83.9	-200.2	-122.9	-139	-112.8	-162.9	-151.3	-104.5	-98.8	-99.8	-153.7	-70.2	-172.5	-115.2	-133.8	-75	-118.1	-131.6	-128.3	-98.2	-96.8
830	14.7	-17	35.5	81.3	58.8	48.3	45.3	78.6	117.6	113.3	-6.6	135.6	26.9	79.7	90	54	111.5	46.3	26.5	50.3	113.2	59.8	83.5	30.3	27	-6.2	95.9	56.6	118	40.2	51.8	95	132.2	54.8	19.6	65.8	52.9	94.8	68.1	62.5	47.1	84.9	130.2	42.8	95.1	-11.8	55.1	117.1	82.7
831	-15.1	-110.7	-120	-66.9	-158.8	-166.9	-179.6	-2.9	-36.1	-155	-150.9	-148.1	-90	-99.8	-89.6	-75.4	-159.8	-60.6	-52.2	-63.6	-124	-16.5	-33.4	-60.7	-247.4	-112.6	-1.2	-96.1	-115.4	-339.6	-100.9	-150.6	-91.8	-301.8	-412.4	-115.5	-201.6	-135.6	-155.5	-29.9	-346.8	-169.9	-259	-75.5	-90.6	-139.9	-23.1	-159.6	-67.3
832	187.5	83.2	42.9	49.6	14.2	42.9	51.6	29.3	79.8	83.2	211.8	196.8	47	66	54.1	44.1	28.6	33.5	9.5	43.4	100.4	44	101.1	58	66.8	40.3	43.8	30.3	70.8	8.4	32.1	35	84.1	74	325	64.1	128.3	40.4	96.8	40.2	33.3	26.1	63.4	54.7	29.4	78	95.2	110.7	36.6
833	39.2	231.8	156.3	196.1	122.8	116.2	99.4	136.1	24.7	365	353.8	216.3	103.8	177.7	135.3	338.6	459.6	327.8	162.3	169.8	151.5	275.6	253.9	134.7	427.4	271.8	135.7	158.1	-27.2	-68.4	177.8	261.1	97.2	88.4	75.9	280.4	-8	130	-18.4	35.4	1574.4	-80.8	82.5	66.7	103.4	89.5	161.9	102.5	338.9
834	1418	3250.5	1361.5	1327.2	840.5	812.9	1242.4	1218.2	1791.5	2167.2	1636.9	1300.5	1106.3	1276.1	1022.5	812.4	2862.3	2584.5	1613.1	1411	1030.3	1128.7	1756.9	1380.1	2068.3	1748.6	1087.2	745	1105.9	1354.1	1246.7	1737.4	1516.5	971.4	1082	1234.8	989.3	787.1	1451.4	684.5	1245.1	605.9	1217.3	1544.1	990.9	1062.5	348.8	1022.2	978
835	255.9	323	186.5	146.6	146.7	120.3	200.3	114.7	254.8	170.1	276.7	277.3	233.6	249.5	266.2	122.5	205	276.3	182	57.3	121.4	77	174.6	91.5	502.2	352.2	248.7	167.1	88.4	478.3	127.3	87.1	159.4	158.3	263.3	153.7	273.9	231.6	379.2	266.5	227.2	409.7	176.2	208.2	420.8	295.4	218.7	238.4	171.2
836	146.8	118.1	87.5	110.1	203.2	86.2	119.2	110.8	47.1	75.3	163.9	143.3	114.9	105.8	85.2	49.6	38.7	173.7	112.8	85.9	121.4	60.2	164.4	82.8	237.3	67	112.3	173	112.3	53.3	97.9	130.7	307	224.9	83.3	75.5	103	161.4	338.8	163.3	96.8	113.4	172.9	75.3	77.2	160	105.5	134.8	97.6
837	-64	26.4	-11.1	-55.7	-46.5	6.4	-46	-8.7	-18.7	-36.2	-33.7	-44.5	-16.1	-36.8	-11.7	-18.9	-63.7	-33.4	-9.1	-10.3	-43	-17.9	-29.3	-17.2	-89.8	12.1	-19	-27.7	-66.2	-58.4	-47.6	-38.5	-60.8	-34.2	-86.2	-19.3	-40	-10.4	-36	-8.8	-67	-41	-51.4	-5.4	-30.4	-40.3	-17.8	-76.3	-11.5
838	-154.1	-14.6	-31.8	-31.9	-31.5	-59	104.1	-18	-45.8	-38.4	-19.5	-74.2	0.5	4.5	13.4	14.4	-66.1	-47	-64.2	-38	-7.9	-26.2	-70.5	9.2	-13.1	-37.9	-28.6	-37.4	87.5	-30.1	25.7	8.9	-19.6	16.8	98.7	-57.3	-0.5	59.7	-23.6	42.2	39.3	-144	82.4	-11.2	86.4	-62.4	-24.2	15.2	-75
839	80.2	162.1	50	133.1	103.5	126.7	99.7	54.4	309.8	72.2	149.6	127.8	142	141.2	195.3	81.8	121.5	104.5	136.8	45.3	107.7	76.7	75.8	99.7	194.5	223.4	153.4	109.7	119.9	286.8	87.1	96.2	134.8	102.9	6.4	92.9	218.2	156.2	208.5	147.7	137.8	118.1	45.3	20.4	177.2	120.1	198.1	89.7	127.9
840	84.6	194.7	124.7	116.4	138.8	121.1	153	103.2	240.6	89	137	93.9	103.3	129.6	132.3	69.4	133.2	122.3	92.9	88.1	106.8	75.3	94.3	122.9	185.1	288.8	119	127.8	168.8	248.1	146.1	131.1	135.7	217	226.3	145.2	231.2	220.9	250	160.6	188.4	92.5	199.5	157	199.2	215.1	154.2	116.8	101.4
841	-82.8	-58.9	-44.5	-104.1	-119	-1.4	-106.9	-48.9	1.5	-98.1	-57.7	-88.4	-19.4	11	-43.6	2.8	-146.1	-58.1	-20.8	-34.2	-103.8	10.1	43.5	-32.2	-116.6	58.5	-34.6	-37.6	-42.4	-202.5	-39.7	-109.6	-51.8	-125.9	-152.2	-14.5	-123.1	8.7	61.8	8.4	-32.6	-89.9	-53.2	-44	37.8	-50.5	6.4	-98	-34.6
842	157.8	175.7	141.2	120.7	78.8	89.6	98.6	105.3	115.3	90	170.4	134.1	129.6	76	68.8	30.2	115.9	105.2	116.1	66.9	190.8	108.2	81.8	137.5	108	92.7	96.5	108.7	134.3	57.9	82.4	134.5	107.4	122.1	136.5	122.1	97.9	158.4	95	108.4	191.6	76.6	80.4	95.6	113.4	123.8	106.3	172	66.5
843	-180.9	-59.5	-49.1	-58.9	-60.8	-42.3	-170.3	-42.2	-36.3	-4.8	-26.4	-37.6	-65.7	-35.8	-34.4	-49	5	-32.8	-26.7	-15	-97.6	-41.6	-54.4	-51.3	-2.5	-79.6	-46.3	-60.5	-144.7	-123.9	-47.4	-81	-43.6	-98.9	-124.6	-105.4	-70.3	-2.7	-39.4	-47.8	-87.5	-65.2	-85.1	-54.3	-21.4	-20.4	-110	-44.9	-34.4
844	-40.1	-0.7	-27.6	-38.6	39.4	-14.9	-73.9	1	-40.3	-0.7	-10.8	-38	-13.1	-0.3	-6.9	7.6	-42.7	-14.4	-24.6	-9.4	-7.3	8.4	-32.3	-25.2	-30.5	22.9	27	-46.2	-22.7	35.4	-47.3	-40.3	-32.5	-53	-147.4	-29.9	-51.9	-5.2	-75.9	-11.4	-38.4	49	-62.3	-39.7	-12.8	27.2	0	-23	-5.3
845	92.2	57.7	51.4	48.9	88.6	55.9	42.6	69.9	86.7	111.6	59.4	33.3	126.2	97.9	93.2	44.5	57.8	71.7	42.1	73	48.9	118.8	61.5	73.1	122.7	42.6	68.6	76.1	52.7	112.6	61.7	49.6	92	99	86.7	54.8	71.2	59.4	27	92.6	61	60	94	103.5	130.7	125	66.1	36.1	37.1
846	15.7	-11.4	-1.4	-3.6	4.6	-1.6	26.2	16.9	11.9	-13.3	3.1	-1.2	8.6	9.8	21.3	-2.9	-5	17.8	9	7.6	5.9	-10.7	-13.7	10.2	36.8	-1.2	9.4	0.7	16.8	12	4.5	11.8	-2.5	1.9	58.2	14.6	-0.9	22.9	17.5	27.6	24.2	-11.9	24.8	8.1	6.9	3.6	14.8	3.8	7
847	109.3	139.2	155.6	102.1	233.6	231.9	169	199.8	173.4	51.4	79.5	98.7	389.7	247	83.2	292.1	87.9	154.2	170.1	41.5	73.1	57.3	84.5	72.8	249.1	183.4	134.5	203.2	85.9	220	116.1	97.3	86	137.3	101.5	172.4	128.6	33.7	299.7	277.1	89.6	105.3	252.7	329.6	121.6	296.4	228.6	87.7	218.4
848	153.1	86	102.7	130.1	135.2	125.4	231.3	77.2	107.7	43.8	195.9	131.7	140.1	61.4	122.6	68.5	67.3	58.4	48.7	39	133.2	124.8	72.8	89.4	164.1	160.1	116.7	131	271.3	192.6	128.3	114.3	166.5	170.3	110.2	121.3	92.3	76.9	135.4	152.5	135.4	103	166.7	98	100.8	121.7	157.8	115.4	61.8
849	-384	-192.7	-163.4	-196.9	-233	-186.6	-287.5	-115.2	-301.3	-186.7	-165.9	-239.2	-167.2	-307.9	-178.3	-80.9	-229.9	-133.3	-112.6	-84.1	-157.6	-167.2	-169.1	-112.5	-367.3	-364.4	-175.6	-167.2	-340.4	-504.4	-193.4	-242.9	-272	-298.7	-613.3	-228.8	-300.9	-212.3	-392.4	-207.6	-256.1	-383.7	-335.9	-103.5	-253.5	-203.7	-137.6	-215.3	-110.3
850	-95.6	16.2	-2.6	-49	-67.5	-10	23.1	-4.3	118.2	-3.6	-46.9	-25.9	-28.7	-6.8	23.2	-23	-41.3	-11.8	-20.6	-16.1	-11.4	-57.9	-6.5	-18.2	-15.8	37.2	-32.8	-17.9	-50.9	-66.1	-101.4	-33.1	-28	-13.4	35	0.7	39	-77.1	6.8	15.1	8.9	4.3	-36	-58.3	8.5	15.8	-14.9	-19.9	-9.1
851	357.9	106	112.3	136	154	164.1	318.1	113.2	183.6	180	200.1	270.4	60.5	117.6	176.8	106.5	208.2	67.7	50.5	82.4	191.7	152.4	186.3	67	65.2	68.8	181.9	186.1	225.8	214.1	137.5	222.8	200.4	176.1	225	147.1	133.4	105.5	168.3	243.9	93.3	193.2	150.4	104.2	120.4	186	160	147.7	130.4
852	69	50.3	56.5	65.2	38	77.8	24.7	22.9	-8.1	18	172.4	63.7	35.6	53.9	30.6	111.8	46.1	27.6	119.2	68.5	14.3	10.5	27.2	23.9	39.4	50.8	20	20.2	11.2	117.1	95.7	49.6	41.8	23.4	-16.1	98.8	139.4	149.2	21.7	78.7	121.6	38.6	-24	86	10	148.7	49.7	11.5	40.9
853	30.5	36.6	19.9	7	23.5	-12.1	18	15.5	6.6	11.6	17.3	1.4	12.3	24	5	9.9	19.6	21.3	5.7	10.6	21.8	23	13.5	13.2	28.7	56.6	13.7	19.8	77.7	14.3	32.8	13.5	33.5	39.9	60.7	38.1	8	30.4	65.5	29.1	26	35.9	19.6	22.7	37.9	19.5	14.3	18.9	7.1
854	583.5	386.4	316.1	471.6	389.4	424.6	655.4	353.1	608.6	278.1	469.7	535.6	380.1	451.8	391.2	219.8	446.1	355.2	353	270.2	559.6	405.6	525.1	268.5	636	879.3	367.4	411.6	698.4	517.5	433.8	551	354	603.1	1034.5	252.8	780.7	548.1	599.2	574.1	374.3	451.6	602.2	386.5	576.4	339.8	414.4	499.3	369.8
855	46.7	107.8	101.3	60	90.7	-40.3	45.2	-13	-4.2	-38	-57.5	-33.5	137.1	3.9	83.7	30	92.3	-15.1	-27.1	-18.4	75.5	50.2	68.4	49.7	-42.8	108.1	-23	72.5	81.4	-30.7	34.3	76.3	-18.5	81	118.6	127.9	46.4	102	13.3	-73.1	96.3	49.1	83.9	-7.3	-14.6	68	52.2	-50.8	-8
856	-198.4	-28.1	-50.6	-96.2	-42.4	-70	-62.4	-15.3	-140.7	-66.7	-41.4	78	-53	15.1	-22	-87	90.5	-184	-28.9	-68.5	-71.4	-29.3	-9.8	-49.5	-304.3	-70.3	54.3	-20.8	-212.2	-93.2	-77.9	-9.9	-78.2	13.3	-103.4	-33.3	-86.7	-1.1	-160.3	24.2	-59.9	-104.9	-78.4	-109.9	-107.3	-70.6	-71.7	-93.3	-47.1
857	-10.5	25.1	0.1	2.9	2.5	-25	-12.1	-3.6	-44.6	-9.2	-9.9	0.8	30.2	-11.8	17.2	-12.8	-50.7	-9.5	-0.1	0.3	36	15.4	3.7	11	-29.2	-52.1	14.4	1.9	23.5	26.3	-44.8	7.6	55.2	0.5	-20.7	-1.5	93.7	-16.6	21.5	-10.5	-23.2	22.8	-40.6	18.3	12.5	29.2	23.5	15.1	-4.4
858	56.5	120.1	-48.2	-26.8	-21.3	-0.4	32.8	24.3	-6.9	-88	-89.7	-90.6	-66	-4	27.9	-43.1	-124.6	-75.9	-38.1	-63	5.3	-26.8	-27.1	35.2	-188.3	-67	-17.8	-84	-145.4	-153.7	-44	5.9	33.7	33	-187.9	-135.1	-110.6	-30.1	-220.2	-124.4	-191	-38.3	30.1	-45.5	-31.1	-76.2	3.2	-145	-67.7
859	78.9	173.9	115.8	98.5	322.3	211.8	150.1	65.3	150.4	18.6	61.1	166.7	198.7	167.8	138.1	23	41.2	105.1	121.7	76.3	142.3	115	185.3	213.1	239.5	274.5	201.7	163.9	204	140.6	167.4	203	234.4	314.3	253.1	55.7	68.5	113.7	256.7	10.1	54.7	287.1	318.3	106.4	44.5	126.2	81.8	260.6	135.7
860	-176.5	-162.2	-235.5	-198.5	-233.3	-196.9	-233.4	-168	-173.4	-199.8	-172.6	-208.9	-139.3	-264.2	-212.5	-87.8	-137.1	-171.6	-132	-104	-164.3	-133.7	-216.9	-134.5	-406.6	-372.8	-211.1	-301.1	-347.9	-295.6	-184.3	-288.8	-260.6	-470.9	-470	-163.5	-271.7	-292.9	-275.6	-141.6	-255.8	-171.3	-259	-156.7	-135.9	-307.6	-134.3	-163.8	-215.1
861	-84.3	-5.6	-27.8	-5.4	-59	-12.6	-63.5	-16.7	-19.5	-85	-74.8	-90.5	-14.9	-1	-24.9	-62	-86	-27.1	-36.7	-32.3	4.3	-5.2	-24.8	-15.8	-81.9	75.9	-52.7	13.3	-118.7	37.9	-82.8	-24.9	-52	-23.7	-197.5	-41.7	-0.5	-12.5	-69.3	16.1	-56.7	11.1	-21.5	-47.9	10.8	-15.9	-16.7	-73.6	-41.7
862	296.8	205	150.1	185.8	363.5	185.8	267.8	166.4	294.6	138.6	268.1	266.9	165.5	182.7	218.3	141.7	214.2	140.2	129.9	157.7	235.2	243.8	179.5	222.6	307.3	333.9	241.7	207.5	274.4	383.1	215	201.3	231.7	277.7	433.1	199	191.5	234.2	249.2	222.7	187.1	249.5	309.7	135.6	187.8	191.1	164.2	284.7	151
863	-51	63	-21.7	-0.7	-9.5	10	-7.2	1.3	67	33.3	29.1	22.7	-19.2	1.5	7.3	24.2	17	7.6	28	37	-7.6	10.5	-32.2	37	-108.4	39.6	6.4	-57.1	-70.6	9	-15.7	-7.7	-12.6	-37.8	-218.7	-0.2	4.3	-29.6	-46.5	-18	-37	-0.6	17.8	36.6	-172.3	52.4	31.9	-14.6	5.1
864	-227.1	-79.4	-93.6	-49.9	-191	-97.4	-124.7	-80.3	-51.4	-52.2	-46.5	-41.6	-125.2	-83.6	-84	-22.2	-60	-28.5	-73.8	-56.6	-90.1	-68	-72.2	-51.5	-181.4	-156.8	-35.3	-71.1	-118.5	-338.4	-138.6	-94.6	-33.9	-59.7	-226.8	-56.1	-204.4	-152.2	-195.4	-83.3	-85.1	-169	-79.5	-16.6	-55.8	-47.4	-47.1	-61.1	-58.9
865	-68.4	-20.9	-32	-32.1	-85.4	-60.3	-84.1	-28.4	-83.3	-26.8	-23.7	-44.8	-34.4	-53.8	-38.3	-15.7	-23.6	-33.9	-17.4	-28.2	-17.6	-37.4	-46.3	-24.3	-44.1	-103.1	-15.6	0.7	-91.6	-86.8	9.8	-74.3	-66.6	-81.3	-106.4	-47.4	-59	-49.3	-40.5	-62.2	-45.5	-37.5	-62.1	-24.3	-33	-70.2	-21.4	-42	-21.1
866	-41.9	-65.6	-23.5	4	-42.8	-5	-11.9	-2.3	6.8	10.6	-19.1	3.1	-5	-3.8	-0.1	-3.5	-20.1	-8.1	-4.2	21.9	-18.5	-6.8	-10.1	-25.5	-4.6	-57.4	-20.2	-31.6	-59.9	-43.5	-15	-17.6	-26.2	-55.6	27	-12.8	21.5	4.9	-10.5	-26.2	-33.5	-46.1	9.3	-24.1	-36.5	-15.6	7.8	-14.8	12.6
867	-170.7	-34.9	-1.7	-88.8	-139.9	-33.5	-185.3	-30	-66.6	4.9	-92.1	-51.2	-69.5	-60.4	-15.4	-35.8	-48.3	-41.8	-43.8	-13.6	-38.8	10.3	-83.6	-15.1	-36.3	2.6	-134.2	-68	-92.3	-191	-41.9	-69.4	-75.2	-104.4	-202.3	-25.8	-108.7	-63.5	-99.8	-97.8	-36.4	-107.1	-54.7	-58.4	48.5	-119.9	-82.3	56.6	-17.6
868	15.5	51.9	6.6	26.2	46.6	-6	65.2	0.4	33	-6.5	-41.6	-5.9	25.2	24.6	24.8	-10.4	-7	-28.3	-15.1	3.5	19	9.4	4.8	30.4	16.5	29.1	34.3	-7.1	81.7	95.5	49.3	-11.4	5.4	6.3	14.5	11	21.6	8	-17.7	37.9	-4.3	-73	5.2	8.4	-19.9	8.3	-9.4	-11.2	9.3
869	-151.3	-4.7	-19.7	-37.8	-56.5	-29.8	-289	-29.3	-29.8	-85.7	-50.8	-221.9	-5.7	-14.4	-56.3	-12.7	-38.6	-49	-53.7	-21.4	-68.5	-50.6	-66.5	-5.9	-187.6	34.7	-74.9	-142.2	-213.2	-97.3	-156.9	-51.8	-123.6	-58	-205.8	-2.1	-24.3	-17.1	-23.4	-1	-24.7	-86.9	-96.1	-25.6	-8	-27.6	-53.6	-70.5	-81.5
870	62.7	74.5	99.4	67.2	20.1	32.4	80.6	126.4	90.6	23.5	197.2	108.8	198	119.2	49.9	44.3	174.5	106.2	145.1	49.8	203.1	15.7	38.1	82.3	-2.1	51.2	94.5	84.8	151.3	79.6	94.7	178.2	86.1	105.8	217.2	16.7	5.3	-34.9	103.6	126.4	54.2	79.7	53.8	101	126.3	57.4	123.9	339.2	159.6
871	-55.2	4.5	-3.9	-26	-0.3	8.3	-20.5	-2.1	-49.7	12	10	4.4	-9	-45.9	-11.8	5.3	-36.5	-1.2	-26.5	-20.2	-14.6	-12.9	22.5	1.7	26	-75.9	-15.4	-14.9	4.7	-38.7	-39.1	-20.4	-24.6	4.7	-51.5	-8.4	-9.4	-2.6	-68.4	2.1	-78.4	-32.2	2.7	-42	-51.3	-40.8	-52.9	-24.3	-26.7
872	-473.2	96.1	161.9	24.2	-189.6	195.1	-184.3	3.4	32.4	-73.8	-115	-416.4	-55.9	-29.7	-41.5	74.7	-297.3	8.7	-73.7	29.2	-204.8	109.6	-209.1	-85.1	-251.1	-147.1	-236.6	-99.7	-277.3	-507.3	-384.3	-179.3	-258.9	-421.9	-462.5	6.6	-231	-259	79	-213.3	-163.4	-134.1	-272.5	-26.6	-150.9	-201	-186.1	-351.7	-222.4
873	164.7	291.3	3.1	303.6	133.8	146.8	199.6	346.8	66.3	148.4	323.8	241.4	218.5	292.1	274.9	367.1	-10.4	321.9	416.1	207.3	240.5	118.4	308.4	501.5	229.2	439	283.2	254.6	487	75.2	313.7	148.9	307.7	248.3	88.1	629.8	165.9	388.1	414.4	358.4	426	132.2	279.1	536.9	275.3	451.1	329	162.8	174.1
874	107.5	360	89	105.6	80.1	128.8	162.1	140.4	272.4	240.9	498.2	275.5	540.8	613.8	308.7	106.8	395.9	291.8	197.7	67.9	460.8	224.7	126.3	407.6	250.4	177.2	282.9	443.3	188.9	165.6	198.8	378.9	197	291.7	21.1	62	127.9	91.9	356.2	226.2	127.9	225.5	278	447.7	198	257.7	109.3	314.8	197.6
875	18	69.3	9	23.7	52.1	7.6	70.7	-2.8	-2.6	19.5	17.6	0.4	9.3	30.2	60	8.1	17.9	-4.2	2.5	16.6	9.9	-8.9	16.8	33.8	128.1	-7.1	73	2.1	123.6	24	0.7	11.6	21.4	89.2	78.1	14.8	-54.1	-39.5	33.8	-19	-40.1	-17.9	13.3	20.8	-13.9	-11.9	-19.8	1.3	-4.8
876	54.9	119.8	39.1	26	108.9	140.7	38.9	38.5	36.8	25	64.7	60.2	43.7	25.6	9.4	39	68	38.7	39.2	33	65.5	56.5	15	39.2	93.4	4.3	30.4	52.9	30.4	134.8	23.5	98.7	13.4	45.9	67	73.7	1.8	30.3	64.2	86.4	54.6	91.8	49.7	56.3	13.2	229.8	188.5	67.6	19.7
877	136.3	190.6	208.7	245.7	165.4	237.2	115.8	142.5	163.1	32.9	133.9	119.5	90.3	164.6	170	151.4	194	104.1	165.9	156.9	101.6	163.4	123.9	137.6	-7.7	148.6	153.9	178.4	242.3	80	-33.1	139.8	33.8	160.9	74.9	368.9	110.8	284.2	145.2	141.7	88	137.6	143.1	267.2	260.6	154	81.9	-7.6	166.7
878	332.1	1034.8	1118.5	535.2	733	386.8	634.1	915.7	447.6	528.5	591.3	563.5	589.4	437.7	464.7	822.9	636.1	606.5	841.9	704.3	579.4	922.1	607.6	506.8	1727	499.6	346.4	653.9	829.5	889.3	916.9	664.4	390.4	929.9	318.2	553.8	866.9	890.1	749.9	443.6	897.2	433.4	497.3	785	873.9	808.1	393.8	743.2	475.5
879	6157.2	5126.1	4545.7	5046.9	10675	10395	8899.5	4029.2	12354	7799	5614.9	7706.8	6858.2	5177.8	6887.4	9311.5	8127.7	2261.6	3450.5	4622.1	6188.1	7029.3	5113.8	4643.6	19941	8703.7	3860.4	8530.1	5541	13029	8464.5	4646.3	3825.7	6037.6	18648	4245.1	6614.5	6062.3	8742.8	18392	5595.5	7239.9	4738.6	4288.4	9452.7	5856	7655.3	5677.4	2577.6
880	75.6	214.9	156.6	365.9	-50.3	85.6	115.9	76.6	248.6	99	111.6	79	135.6	124.7	129.1	-26.6	74.3	40.3	-6	81.8	34	45.5	60.3	59.9	37.4	163.7	98.2	116.8	23.4	201.6	65.1	97.9	94.7	131.5	73.8	29.6	28.5	51.6	246.8	77.8	-8.4	28.2	22.5	4.4	96.2	129.6	-1.4	28.4	28.8
881	45.2	73.2	30.4	9.3	24.3	47	1.2	10	65.5	-1.5	-7.3	-3.2	30.4	21.4	23.7	8.9	13.1	16.7	1	-1.5	30.7	19	-0.7	27.8	33.6	136.5	21.9	21.1	1.9	67.1	20	22.3	2.7	15.4	24.5	19.2	-21.3	22	33	11.2	74.3	116.1	7.8	33.4	54.4	2.9	13.9	6.7	0.1
882	6.5	-37	-17.2	-59.9	3.6	-89.6	-120.3	-9.5	167.5	54.5	27.5	54.3	-53.7	-106.6	-19.2	15.3	-66.4	22.9	15.8	125.5	-105.4	26.4	-42.2	-72.7	-119.7	-161.1	-76.2	-19.9	-182.5	-234.8	9.2	-131.3	98.1	-156	-138.1	-6.9	23.9	-82.7	-61.5	-89.1	-217.4	-51.8	7.8	-65.7	27.4	-0.8	58.5	28	22.4
883	4.2	304.9	407.1	342.6	219.5	369.5	152.1	207.5	158.5	434.3	447.7	507.7	309.1	270.7	228.3	210.5	219.4	319.9	438.8	149.4	382.6	266.1	352.5	312.5	190.8	742.8	224.3	494.5	-5.5	96	-101.9	212.3	272.6	204.9	95.2	331	151.3	325.6	347.2	265.4	345.5	284.8	153.9	295.7	91.7	351.3	265.7	423.1	399.7
884	-196.9	-83.6	-127.5	-98.5	-160	-135.8	-179.7	-75	-119.7	-81.6	-101.5	-118.1	-93	-136.3	-95.3	-61.2	-171.5	-97.8	-59.9	-55.8	-107.3	-99.1	-75.8	-113	-64	-218.1	-89.1	-145.2	-266.7	-292	-131.7	-123.9	-144.2	-195.4	-322.9	-108.6	-156.3	-148.7	-171	-108.7	-129.6	-186.5	-159.2	-90.6	-96.3	-147	-95.2	-126.4	-74.3
885	66.3	38.7	44.5	40.1	37	44.7	-3.9	11.6	40.7	21	34.6	0.8	70	19.6	54.6	6.1	87.1	24	17.3	51	36.7	63.2	46.1	40.1	41	-4.2	24.6	33.2	53.7	39.6	16.8	51.6	12.2	30.1	70.9	64.5	-1	55.8	45.5	46	73	-4.1	62.2	78.1	58.6	26	57.6	5.5	2
886	-476.6	-94.9	-256.2	-51.2	-247	-261.5	-391.1	-72.3	46.5	-193	-232.7	-115.9	-222.1	-304.5	-17.1	-49.6	-337.7	-129.4	-156.3	-139.7	-272.8	-48.8	-24.7	-172	-321.9	-613.4	-266.4	-225.8	-451.2	-764.7	-292.7	-338.7	-208.7	-164.5	-949.3	-177.5	-474.5	-322.8	-392.2	-172.6	-272.1	-319.6	-391.8	-119.5	266.1	-326.4	-116.2	-125.8	-190.1
887	1277.8	2002.5	2038.6	1984.9	2353.5	1828.5	1265.9	1567.1	3123.6	2738.2	2081.8	2324.9	1793.3	1491.5	2346.8	5307.4	2737.9	914.3	1407.2	2793.3	1660.1	1739.3	1448.4	1698.5	3733.2	2322	1148.8	1743.7	1330.7	1945.4	2431.1	1309.3	1335.4	1720	4088.4	1628.6	1466.9	2712.7	1753.2	2444.9	2378.6	1032.6	1702.8	1293.3	4111.3	1533.1	3463.1	1776.8	1268.9
888	-11.5	-19.7	-5	7.1	-2.7	-17.1	-43.9	-12.6	-39.4	-14.4	-24	-8.2	11.2	-0.3	12.7	-15.4	-5.1	-18.3	-3.7	-14.7	-14.9	-8.8	-14	14.6	-57.5	-22.5	8.4	-15.6	-14.9	-10.6	-5.4	-9.1	21.9	0.9	-35.7	0.6	-12	5.2	-22.9	8.8	-26.7	-4.7	11.3	10.5	33.5	5.1	-2.5	-17	-8.7
889	-113.8	-24	-31.4	3.4	2.4	-31.6	-70.8	-6.6	-42.5	20.2	-16.5	-36.1	2.1	-8.8	-12.2	-41.5	-18.8	-7	-17.8	-12.4	-30.7	13.3	-15.6	-10.9	-64	-97	-35.2	-38.4	-27.1	-24.8	-38.6	-5.2	-72	29.5	51.9	9.6	-16.3	-32.6	-36.8	-81.3	40.4	-34.7	-39.7	-34.3	-21.8	-0.9	-9.2	-4.9	-0.3
890	39.6	-14.4	2.8	74.4	2.8	-8.7	58.4	33.5	94.3	19.2	28.2	7.4	28.6	20.8	61.5	11.5	27.5	21.6	26.4	23.7	20.1	46.5	38.4	13.2	13.5	-43.2	48.8	7.6	6.4	41.4	22	2.9	47	80.5	99.9	51.5	-34	12.1	25.2	43.3	23.5	81.8	64.9	30.3	71.9	31.1	50.6	12	32.8
891	-159.9	-30.8	2.6	-30	-75.7	-35.4	-21.8	-50.5	20.1	-46	-61.5	-17.5	-10.8	25.3	-54.5	4	-11.3	-16.7	-33.9	-4.1	-38.8	-88.6	-43.7	-27.1	-18.7	-44.4	-41.6	-24.7	75.5	14.7	-45	-28.4	-59.3	52.9	15.5	-44.9	-93.5	10.5	-18.8	-73.3	5.5	-67.7	-86.1	-2.2	-3.5	38.5	-63.2	-58.2	-32.6
892	-18.2	-53.5	-6.5	-9.6	-40.1	-4.9	-27.2	-5.9	-5.8	1.9	-22.2	2	-8.1	-11.6	-28	-7	-1.6	-9.2	-19.1	-13	-14	-11.7	-9.2	-20.4	-31.7	-17.8	-13.6	15.2	-33.9	47.9	22.2	-36.9	-28.2	-22.9	-69.2	-26.5	-54.4	-15	-19.2	-2.2	-19.4	9.7	-31.5	-18.7	14.1	-9	-31.7	-1.4	-22.6
893	218.9	177.2	77.9	177	16.8	79.5	251.7	65.4	78.9	141.2	171.2	195	155.8	69.8	163.5	53.5	139.8	73.1	75.9	50.2	163.7	120.9	170.2	138.4	91.4	42.2	105.7	88.7	172	94.6	104.3	157.4	136	208.1	250.4	135.6	50.8	26.1	63.8	110.9	133.1	54.4	166.3	78.6	106.6	88.5	233.2	126.8	46.9
894	282.3	204.2	104.9	183.7	146.2	102.9	313.2	155.6	197.2	193.6	169.5	288.3	193.8	176	290.2	80	179.1	109.7	147.1	103.7	194.6	198.9	279.2	143.7	142.2	232.4	273	204.1	231.5	449.4	129.4	201.1	97.3	402.1	408.2	123.3	265.9	179.3	246.5	320.2	132.1	254.5	151	128.1	242.5	111.2	123.2	222.7	120
895	28.4	152.2	51.4	117.1	62.5	50.8	104	-2.4	90.2	188.6	291.7	219	97.1	51.6	80.2	-5.5	272.8	48	45.6	-11	-1.7	-3.9	94.6	19	63.3	-26.9	82.3	29.4	199	211.5	110.1	100.7	139.7	173.3	-26.9	13.6	11.3	35.9	55.2	79.5	4	-25	124.1	49.5	81.8	65.7	46	211.9	-16.7
896	4749.6	10909	4161.4	5643.4	6711.4	5373.7	6915.9	3893.5	11062	7389.4	8738.4	11427	6012.3	5346.8	9437.5	8889.7	7652.1	2667.1	4984.2	4475.6	6300.8	3930	4505.3	5496	9444.1	12280	5727.5	6121.4	5280	9745.4	11295	5248.5	6527.1	7524.4	17903	4110.6	5533	6983.9	7444.9	7252.9	4577	4063.3	4279.2	4198.3	15561	4434.9	9232.7	6574.9	2992.3
897	104.6	36.7	-38.1	5.1	-42.5	24.3	192.6	79.4	15.6	94.5	-10.7	66.8	9.5	53.4	-60.9	73.9	206.6	33.7	-15.5	53.3	-52.9	4.2	22.2	9.5	-45.3	-80	45.7	-44.3	-83.2	-2.7	107.4	-96.7	136.5	-103.5	-158.5	-31.5	19.5	36.8	131.3	-22.6	-30.1	35.1	-112.5	-22.8	-40.5	-22.1	-21.9	48.6	-1.5
898	27.2	42.4	29	34.6	110	132.2	134.2	31.8	160.7	55.1	28.7	86.7	38.5	24.2	22	22.2	21.8	83.2	31.8	38.3	27.5	7.9	31.4	1.1	136.4	49.6	46.2	65.3	182.8	40.1	52.3	7.1	21.8	34.7	68.6	-31.2	-36.3	35.7	98.7	52.2	30.4	-33.2	99.9	51.3	33.8	58.4	2.3	134.3	35.4
899	33.4	15.1	8.5	14.9	22	33.7	1.1	-5.7	57.9	-7.1	29.9	28.6	4.7	4.3	28	15.1	25.5	-0.7	0.2	3.7	-19.5	3.1	33.7	12.4	-23.9	15.6	6.6	9.1	-26.3	65	23.9	21.2	38.9	-31.1	-14.6	10.7	76.8	12.7	40.9	45.9	-43.1	104.1	-9.7	20.9	27.8	19.5	11.6	21.4	-1.7
900	16.1	38.2	61.9	75.6	89.2	49.5	70.2	32.4	124.4	15.2	40	70.6	36.2	59.7	40.4	17	31.7	40.1	28	35.2	34.7	50.6	43.9	38.6	69.5	93.7	39.1	88.7	50.8	100.4	59.4	37.6	69	72.9	93.6	75.3	63.7	67.8	141.8	84.7	34.9	34.3	16.2	55.9	96.3	83.2	113.6	44.3	42.4
901	251.6	88.9	91.3	103.5	162.9	133.5	170.8	83.8	226.8	115.7	171.4	150.8	88.4	95.3	108.9	71.8	121.9	127.3	96.8	68.5	155.8	122.7	122.2	112	286.8	233.6	172.9	123.8	203.3	109.2	68	69.6	177.8	122.2	235.3	85.3	80.8	89.6	94.9	163.7	51.3	277	137.5	122.6	69.4	93	125.2	137.6	113
902	23.1	-108.6	-96.7	-80.7	-245.2	-93.4	-61.9	-54.3	-186.9	-60.9	-64.9	-38.9	-134.6	-130.1	-34.2	-119.8	-144.9	-62.2	-55.2	-15.4	-128	-11.2	-107.1	-74.8	-83.2	-297.1	-11	-50.6	-295.5	-111.8	-211.7	-121.3	-171.6	-110.1	-226.5	-67.8	-186.4	-160.3	-248.6	-36.8	-313.9	-102.2	-240.3	-22.1	-88.5	-172.1	-52.8	-161.1	-47.7
903	12.7	179	-45.4	63.6	-622.7	403.1	285.5	186.8	-157.7	179.3	-21.4	297	1.4	266.8	164.5	406.8	72.2	26.4	-113.9	-52.4	-170.8	130.4	131.3	87.4	-165.7	1068.4	191.2	16.2	-15.5	251.2	91.9	261.8	206.8	193.8	138.9	762.3	317	75.7	-80.6	135.3	-114.7	-6.6	211.1	165.1	-15.5	72	-16	187.7	36
904	48.9	14.9	4.5	22.6	1.5	27.7	4.4	21.4	61.9	9.5	41.6	52.4	12.3	26	-15.8	18.8	31	36.5	18.7	15.5	31.3	26.9	34.7	34.5	49.9	-29.7	31.8	33	9.6	2.7	40.8	44.7	17.4	40.4	48.5	15.2	48.6	15.9	81.9	28.5	20	7.3	19.1	19.2	44.2	6.5	30.7	30.4	37.1
905	-127.2	5.4	-88.3	-22.5	-40.3	-39.6	-152.9	-33.2	-172.4	-123.2	-150.7	-164.4	-71	-94.5	-81.7	-65.9	-203.7	-6.3	-89.8	-37.4	-79.9	-66.9	-1.3	-53	-105.9	-58.6	-60.5	-48.7	-129.2	-290.1	-90.9	-16.2	-157.3	-171.5	-336.2	4.4	-139.7	-98	-215.8	-57.3	-102.4	-84.7	-97.6	-79.2	-96.2	-121.4	-80.5	-196.5	-78
906	1368.1	1423.8	1931.9	1755.2	2354.9	2810.3	1584.9	1413.8	10336	4099.9	2607.6	4355.3	2562.1	1862.7	2127.3	3280.8	3864.3	1500.3	2368.9	2896.8	2187.6	1950	1849.3	2140.3	5932.8	3222.2	988.5	2165.5	1685.8	1982.4	2617.8	1940.2	1345.1	2175.3	7954.5	1573.4	1751.5	4766.4	2845.8	2095.8	3966	1130.9	1396.5	1581	7062.9	2856.8	4907	2549.5	1928
907	-25.4	-64.3	-48.4	-10.4	-45.4	-31.9	-49.2	-27.4	-65	15	26.1	22.1	-38.9	-13.4	-29.3	-27.6	24.6	-15.6	-30.5	-8	-26.6	-28.6	-49.3	-31.3	-63	-90.1	-11.6	-95	-131.8	-96.4	-54.3	-51.4	12.9	-95.1	-67.8	14.6	-64.6	-33.5	-80.5	-64.5	-11.5	-69.6	-118.6	-32.1	-35.6	-15.1	-13.9	22.5	-17.8
908	-106.4	-19.8	-34.6	-15.4	-31.7	-35.5	-65.9	-7.7	-22.5	-19.9	-24.5	-34.3	-18.7	-12.9	-51.1	-8.1	-40	-10	-13.6	15.6	-44	-30	-5.8	-2.3	-34.5	-113.3	-1.7	12.6	12.4	-12.5	-42.4	-1.6	-51.9	-30.1	-65.3	-19.9	-29.9	-21.2	-40.9	-33.2	-29.8	-33.4	-35	-46.7	-27.5	-3.1	-39.8	-16	-7
909	101.7	63.1	130.3	-10.5	43.9	188.6	-55.4	10.2	125.9	78.7	76	96	51	-32.3	16.3	42.5	77.4	-4.6	-14.5	83.3	-37.8	-16.2	-29.5	-10.4	8.1	124.4	-7.3	-5.5	85.4	192.4	105.8	16.3	-27.8	118.3	-53.5	90.3	77.9	139.8	59	93.3	173.7	146.3	9.5	6.3	94.8	110.9	94.8	-50.9	169.1
910	-31.9	-22.9	-7.9	-0.1	-74.9	-41.6	-27.6	-8.3	1.9	-4.6	14	-43.5	7.1	-39.3	-18.6	15.5	-17	-16.2	-10.4	-5.3	-8	-39.4	-34.8	-20.5	1.2	-91.8	-47.6	-42.7	-94.4	-64.9	-72.3	-36.7	-12.3	-30.1	-68.4	-8.4	-26.5	3.5	-33.9	-15.5	-23.9	-51.5	-15.2	-27.1	16.3	4.4	-5.2	-15.2	-23.1
911	281	134.1	220.9	273.5	246.6	309.8	195	170	544.2	294.2	452.3	444.4	318.8	76.6	298.7	33.8	404	333.7	345.8	192.2	235.8	231.6	405.9	300.7	370	293	404.1	451.1	278.9	262.8	132.4	46.1	184.9	291.3	129.3	183.4	339.5	61.7	217.7	379.1	40.9	602	172.5	348.6	496.2	309.9	428.4	231.2	336.4
912	3189.9	5793.2	3873.4	4179.7	6366.3	4862.8	3732.3	3339.5	6834.8	7136.1	5519.8	8087	4918.3	4572.2	6031.1	8392.9	7874.1	2492.7	4165.1	4506.3	5156.8	4666.9	5370.2	4501.5	12076	11138	3879.8	4418.8	4251.7	5741.9	6472.2	3827	2589.3	4581.2	8264.1	2870.8	3953.7	5588.3	3108.9	4947.8	5618.2	2422	3529.9	3176.9	9681	2738.3	5951.9	5309	3934.3
913	-39.1	-26.8	-37.7	-19.6	-90.2	-53.2	-76	-2.4	-21.2	7.5	40	38.7	-37.8	-50.6	-75.4	-7.7	-102.6	-24.5	-9.8	14.8	-58.1	-41	-17.4	-52.6	-16.9	-111	10.4	-37.6	-138.7	-163.2	-27.8	-91	-87.7	-114.8	-70.4	-87.9	-42.2	-5.3	-115.4	-31.2	-60.7	-52.3	-57	-69.4	35.6	-58.7	-49.6	-23.9	16.8
914	-424.8	-243.9	-253	-189.2	-317.1	-217.7	-296.8	-180.2	-247.5	-210.9	-192.1	-200.5	-168.3	-186.5	-236.2	-85.5	-225.7	-206.2	-168.8	-76.1	-273.3	-143.2	-171.5	-141	-448.9	-433.3	-154.1	-349.6	-253.7	-475.4	-267.9	-304.1	-305.1	-318.2	-640.5	-170.6	-257.6	-252.8	-291.4	-192	-341.9	-281.6	-329.5	-205.1	-150.1	-311.2	-140.6	-343.3	-235.2
915	46.8	14.5	7.6	15.6	32.5	13.8	31.1	21.3	35.8	18.1	0.4	44	19.7	0.2	5	17.1	9.5	11.9	9.5	28.4	29.8	8.5	16.4	18.8	-27.3	30.1	20.2	20	32.1	85.4	-24	-6.2	20	-0.8	24.3	19.3	-17	30.6	-0.6	9.9	-11.3	-7.1	15.8	10.5	14.6	8.5	-2.9	2	36.1
916	273	512.9	156.4	151.5	151.8	175	247	226	135.2	189.1	257	68.9	140.1	174	115.2	120.7	107.6	249.1	134.2	139.6	106.1	161.4	341.9	174.2	209.2	264	148.6	219.8	199.3	166.1	148.1	277.3	96.9	105.8	185.5	191	35.5	384.8	247.3	123.3	137.7	123.6	185.7	202.8	160.5	166.9	222.9	167.5	221.9
917	-44.9	-17.4	-48.4	-50.2	-73.1	-38.8	-72.4	11.8	4.6	61.4	253.7	122.3	-62.7	-51.8	-20.5	-12.3	43.7	37.8	48.6	46	-51.3	-22.3	-22.3	9.7	27.4	22.9	-43	18.5	-24.8	6.5	-31.6	-78.3	-809.4	-121.9	-40.3	74.4	-74.4	-31.1	-101.8	-27.3	-73.3	8.2	-40.9	-18.1	32.5	-61.1	38.1	70.9	15.3
918	-1.6	33.5	6	-17.7	14.3	-6.8	-5.4	15.9	45.2	4.1	-14.6	-12.4	26.5	-0.6	-0.9	-12.9	-18.8	25.1	-8.1	2.1	-10	-4.7	-8	-17.4	-16.3	20.4	-10.9	11.7	-6.2	-27.1	16	-10.5	56	-3	17.3	10.2	45.1	41.4	65.3	-25.9	38.4	40.8	10.4	-6	9.4	-9.3	10.2	-1.1	-11.5
919	171.4	113.7	77.8	122.4	106.4	63.1	180.2	68.4	167.2	44.5	97.6	99.5	108.3	53	143.7	49.9	93.8	64.7	68.2	30.9	142.5	78	78.8	88	213.9	148.5	91.9	89.7	156.3	190.2	88.9	135.8	170.6	177.8	270.6	93.1	146.8	171.4	170.7	143	70	99.7	179.8	105.3	152	123.7	83.4	60.2	58.5
920	-98.1	-28.2	-63.5	-83.4	-117.4	-56.2	-186.1	-61.2	-174.5	-51.2	-154.2	-122.5	-63.4	-180.9	-110.7	-46.5	-137.2	-49.1	-75.1	-48.3	-123.9	-85.7	-82.7	-79.8	-21.4	-195.3	-76	-108	-165.5	-147.8	-87.3	-104.2	-109.1	-131.9	-319	-110.7	-198	-150.5	-303.2	-125.3	-61.6	-132.6	-164.9	-62.5	-68	-101.4	-61	-164.5	-57.8
921	646.4	839	491.1	460	416.4	525.9	730.6	239.6	773.8	231.5	477	315.2	525.5	582.2	432.5	286	523.2	303.9	152.9	233.5	496.9	392.5	399.7	437.7	977.9	552.9	580	569.7	1011.4	559.7	450.2	374.7	415.8	447.9	765.9	384.3	-20	397.3	602.5	661.3	416.2	762.6	409.6	450.3	531.4	441.9	595.2	551.6	329.6
922	1365.5	1092.4	624.2	1097.6	1036.6	2492.1	1482.7	1823	562.1	875.1	758.6	561.3	859.9	588	1865.7	500.9	477.6	671.2	727.1	869.9	1506.5	1586.5	1431.4	1290.5	478.7	249.1	1123.8	1132.7	2358.5	976.1	1229	1269.8	1074.4	553.3	331.8	929.8	1543	449	701.7	1116.8	488	4613.4	1015.6	1345.9	723	1115.8	2043.7	677.7	1378
923	-26.9	-25.7	-30.4	-26.9	27.8	97	54.8	33.2	-83	60.6	-19.8	4	49.3	52.3	-41.5	-40.1	-86.9	16.8	-20.6	-26.9	3.4	-74.9	77.7	49.9	-51	-134.8	0.3	30.3	1.5	-0.7	8.2	18.3	79	45.6	-52.2	-43.5	87.3	-37.5	0.3	-9	-63.1	130.1	61	35.1	-71	33.4	40.5	117.5	64.2
924	101.9	38.5	-9.1	31.8	-44.6	1	-80.3	11.9	34.1	-2	-1.3	43.6	26.7	8.3	-66.3	1.6	55.5	24.3	38.4	-7.8	39.8	29.4	9.1	7	-2.8	54	-66	-31.7	-107.8	-11	-28.8	-67.7	-19.1	-63.8	-91.9	-82.9	-47.3	-25.2	4.8	47.1	-28.3	68	24.9	36.6	2	30.4	-65.4	5.3	28.2
925	96.2	24.2	84.3	27.3	93.8	173.2	17.8	25.7	123.8	142.6	17.9	66.3	64.5	113.5	87.9	51	113.4	79.1	441.4	17	80.6	58.6	69.3	99.5	475.2	281.1	108.1	59.2	89.8	60.9	131.4	73.7	98.2	62.9	104.6	151.3	142.6	284.5	419.7	64.3	174.4	38.3	170.5	171.7	480.9	222.5	201.4	68.3	113.1
926	724.4	1797.8	851.4	1596.7	597.7	761.4	695.7	491.6	678.1	544.1	1598.4	836.9	1003.6	986	647.8	1341.2	884.6	1028.8	763.2	822.5	896.9	632.7	628.5	943.9	680.8	919.8	827.6	952.9	489.7	938	926.6	1069.2	581	1183.9	926.5	1510.2	892.3	729.8	1144.3	794.5	1021.1	977.2	649.8	1051.2	1009	1246	1175.8	555.5	867.9
927	119	197.3	322.8	121.8	855	970	291.1	153	389	369.6	198.2	307.2	615.6	529.1	364.5	369.7	281.2	276.5	303.1	470	359	489.9	612.1	218.6	669.4	314.9	319.7	1138.2	305.8	717.6	177.1	186.6	249	262.8	289	378.5	486.6	210	330.8	343.6	372	310	273	226.3	447.7	489.9	403.8	441.7	204.2
928	66.4	109.4	249.9	225.6	137.3	109	81.2	209	158	82.2	80.4	82.6	224.9	169.7	202.7	218.5	81.2	177.4	147.3	153.9	219.7	171.4	201.8	141.7	194.8	207.9	108.3	198.7	217.4	230.6	123.5	189.9	136	222.2	150.3	216.4	174.4	182	260.1	195	299.8	278.5	160.2	290	190.5	182.9	210	129.6	106.7
929	121	-73.5	45.1	1.7	29.3	26.8	157.1	81.9	31.4	5.9	-18.2	-4.4	61.1	-42.4	4	42.2	-62.4	-11.9	-35.1	47	37.4	20.1	14	77.6	97	-19	40.6	87.1	-44.6	171.2	-17.8	51.2	27.7	69.6	123.1	83.8	20.8	34.1	160.2	-2	77.6	10.8	23.5	96	-64.6	-115.6	69.4	-62	62.4
930	3768.8	2898.1	3516.4	3814.6	5449.4	4157.4	4239.4	2946.3	9896.2	3735.4	2850.8	5678.4	3982.2	4600	5988.2	6193.7	2740.1	2308.5	2553.2	3450.7	6044.9	3659.9	7186.2	3992.8	11330	8496	3032.8	4202.7	3193.7	5247.2	9953.8	4036.8	6572.8	4735.1	12290	2019.6	2899.2	6085.9	4057.5	3228.8	4533.9	4414.9	3112.4	2604.4	7471.6	4203.5	4497	2870.3	2699.4
931	1094.6	550.2	614.8	694.9	560.8	657	673.4	339.9	1144.2	252.3	330.9	222.4	499.3	802.2	703.6	245.6	251	503	542.8	283.5	514.8	523.9	794.4	367.4	541.1	1034.7	835.6	698.6	236.2	957	313.9	767.2	524.5	225.3	745.1	166.7	755.4	664.4	801.4	895.3	512	841.9	578.6	563.1	855.7	612	583.9	264.6	581.9
932	-478.8	5	-43.3	-29.8	32.8	-127.6	-120.2	-71	8.9	-160.3	-231.7	-249.1	-19.8	9.4	2.6	52.8	-237.8	-112.8	-89.4	-55.7	-34.3	-39	-30.9	-40.3	-180.4	-63.8	-111.7	-175.9	-235.2	-74.7	2.9	-45.4	43.8	-83.6	-246.4	-72.7	-47	57	-237.1	-49.7	-54.2	-40.6	120.5	-49	84	-47.1	-43.6	-72.8	-99.2
933	273.5	123.5	174.5	125.2	47.8	102.5	85.5	98.5	162.3	210.8	98	236.9	41.5	132.3	52	41.3	242.3	26.3	40.9	36.5	65.2	58.3	138.2	55.5	90.2	270.3	160	157.8	133.8	205.9	64.5	7.7	62.4	36.3	91.8	92.1	67.1	215.2	201.1	38.2	111.7	188.4	27.9	44.2	96.8	13	93.8	293.1	104.9
934	246.2	191.5	131.5	237.2	151	265.1	147.8	153.2	82.9	181.8	244.6	284	186.9	182.5	129.9	132.9	146.3	162.9	110.3	107	111	116.3	153.5	176.6	117.5	229.6	190.4	228.3	158.9	173.1	74.7	227	164	211.5	14.4	56.9	290.2	139.7	132.1	298.3	33.3	293.2	104.4	121.1	171.5	203.6	186.2	232.7	149.7
935	105.6	67.9	106.5	83.4	109.4	78.6	176	51.4	114.9	229.1	164.1	157.8	68.1	108.6	77.1	77.9	206.5	99.1	55.6	57.2	90.6	59.6	97.2	104.8	161.3	-0.8	72.1	123	111.2	64.7	-10.2	43.6	103.8	106.4	268.8	54.5	6.3	34.9	59.7	-2.3	97.5	163.1	26.9	56.7	62.4	29.9	41.3	159.3	70.2
936	151.2	66.3	152.6	171.4	146	240.9	224.8	122	177.7	144.5	76.5	57.7	170.8	188.5	126.8	75.3	49.8	162.6	141.6	105.8	154.8	128.3	170.5	95.2	192.4	215.9	194.6	305	457	398.8	95.9	122.4	252.3	305.8	311.7	74.7	158.8	208.6	282.4	188.3	112.7	311.5	213.5	141.3	162.9	140.8	172.6	131.8	145.3
937	26.9	45.7	31.3	34.8	56.3	12.4	61.6	46.4	45.4	45.8	40.3	30.8	58.4	46.7	104.1	11	32.1	62.5	44.2	74.5	42.6	35.5	58.5	19.1	11.7	61.3	39.2	18.2	14.7	11.7	25.9	27.6	58.2	94.8	82.5	37.8	40.4	48.9	35.7	20.7	77.3	37.7	41.1	26.9	42.3	40.3	53.3	52	34.5
938	-7.7	-72.3	-57.4	-18.8	-86.7	-76.8	-114.1	-38.7	-77.9	-49.4	-83.8	-34.5	-32.7	-88.3	-58.8	-11.5	-118.6	-43.6	-40.8	-14.3	-49.1	-44.5	-56	-57.3	-106	-52.4	-76.8	-66.8	-81.2	-198.3	-65.3	1.2	-57.8	-80.4	-165.4	-7.8	-69.4	-26	-25.9	-75	-30.1	-20.8	-125.3	-55.1	-42.9	-71.8	-20.1	-55.1	-32.8
939	92	65.2	96.2	37.6	86.7	103.7	76.2	77.4	52.7	93.2	124.2	111.3	92.3	60.9	33.6	41.9	100.8	135.3	73.2	104.1	90	97	119	66.9	-62.7	185.7	90.9	145.5	98.7	20.4	-7.1	78.5	120.6	107	195.1	58.3	-5.8	19.6	57	13.8	36.4	145.7	62.5	60.2	18	50.2	106.3	30.8	92.3
940	-8	28.5	107.1	99.5	53.3	106.5	17.6	53.2	67.2	38.2	85.4	24.8	119.3	105.3	118.5	60.2	97.7	33.7	55.6	150.5	20.4	39.6	52.8	26.5	57.6	142.8	30.3	81.8	45.8	88.2	100.9	83.2	48.1	44.2	69.3	92.5	51.5	124.2	77.1	53.1	124.9	-7.9	81.2	68.8	179.5	176.6	106	-12.4	42.7
941	-63.1	-58.4	-21.3	-33.9	-40.2	-23.1	-72.5	-15	-8.3	-32.1	-45	-56.2	-6.7	-8.3	-29.4	-9.8	-15.8	-32	-45.5	-21.5	17.7	-8.7	-14.3	-15.3	-47.9	-40.8	-34.6	-33.3	-58.4	-73.8	-45.4	-15.4	-45.3	-61.1	-108.8	-27.4	-53.9	-70	-30.8	-9.3	-27.9	-56.4	-24.7	-16	-40	-28.3	-36.9	-52.7	-31.3
942	1638.4	901.4	1138.5	562.1	601	715	1120.2	930.6	1820.3	1728.2	1352.3	2585.1	1084.8	868.3	1011.1	2179.4	2588.9	1001.1	2065.8	2074.7	1408.2	824.9	1490	1036.9	2227.7	1363.5	884.3	1169.3	1636.9	1733.2	1633.1	1044.3	1329.6	912.4	2383	542	1347.9	1608.9	960.3	1532.7	1043.9	627.8	835	997.6	4029.7	567.5	895.2	1894.4	868.4
943	-42.1	27.2	-22.2	-13.6	-26.3	14.2	-4.9	-12.8	-1.8	50.6	9.3	3.1	37.2	35.6	-58.4	4.3	79.3	22.9	-5.4	-7.8	36.2	-4.4	2	-20.8	-55.7	-21	-44.7	4.3	-30.1	-41.5	-9.6	62.8	-34.9	7.2	6.2	-28.6	-66.9	-14.4	3	-37.5	62	-48.3	-20.7	0.3	-13.5	-1.8	-36.9	100.7	18.9
944	96.4	96.1	-55.6	32.7	22.7	-37.7	36.9	23.7	212.1	126.7	202.5	132.6	7.1	-21.6	-3.1	35	116	84.1	131.6	64.2	59.3	1.3	-34.5	21.6	226.8	-74	20.7	8.7	-123.6	245.7	-55	-183.3	35.2	-219	238.3	41.2	-2.9	9.1	160.9	60.8	-42.6	57.6	-150.1	-28	152	88.9	-73	319.2	110.4
945	63.3	48	5.2	11.7	20.3	49.7	-14.9	42.5	80.1	35.2	4	56.2	8.3	26.5	60	20.1	24.4	11.5	-12.1	39.9	43.2	42.8	55.2	47.3	74.2	11.1	47.9	19	79.2	-27.6	-4.5	-2.1	15.5	-7.5	140	68.7	8.7	57.6	37.1	63.7	-5.6	7.4	-31.7	-4.7	-31.7	31	45.2	46.9	12.2
946	-38.1	-73.8	-13.1	-8.4	-40.8	-53.8	-19.6	-27.9	-45.2	-34.2	-8.1	-23.3	-20.2	-17.5	-41.5	-4.4	-40.9	1.9	-14	-3.9	-20	-1.9	-21.8	-12.6	-65.9	-35.5	-16.7	8.2	-78	-23.6	-12.9	-10.1	-6	-56.7	-96.7	-37.9	-122.7	-16.3	-88.1	-46.8	-75.7	-43.2	-12	-20	-0.7	-16.7	8.7	-24.7	-35.8
947	-0.7	17.5	530.7	89.7	187.2	-2.2	433.2	182.7	244.2	25.6	4.7	39.3	58.7	158.6	610.4	188.3	-32.3	385.3	218.2	473.7	63.5	109.9	0.4	20.2	125.3	-28.6	81.9	183.9	84.4	115.7	48.4	116.4	169	181.4	-47.5	485.1	-46.9	118.2	566.8	255.8	1454.5	116.8	3.1	40.5	237.8	367.8	594.1	85.1	4.2
948	-30	205.6	51.9	60.5	23.6	198.7	-119.8	31.7	308.4	181.9	297.4	217.6	56.9	168.3	102.4	35	259.1	284.5	292.4	52.7	44.6	23.2	148.7	98.7	118.2	257.3	141.7	140.8	65.8	316.5	-19.2	36.9	162.7	114.6	-101.6	11.6	219.1	116.4	196.1	247.4	67	143.6	136.6	78	177.8	214.7	78.2	180.4	385.8
949	-73.1	-73.7	-15.8	-30.9	3.5	-39.2	98.5	31.7	55	-20.2	32.4	48.6	5.8	-19	-35.4	-32.5	-28.7	47.8	-7.4	35.8	-42.7	22.6	44.6	-0.2	-46.7	12.4	-24.9	-19.7	-179.7	-53.8	-7.4	-107.2	3.2	-135.5	-321.4	20.8	-7.1	70.4	104.5	30.4	-110.3	-10.3	-78.2	25	75.2	-52.8	42.9	26.4	44.5
950	-172.5	14.3	-93.6	-123.4	-62.6	1.3	-172.3	-112.1	-88.4	-97.3	-53.5	-121	-57.9	-151.3	-159.3	-105.2	-257.3	-101.5	-103.2	-43.5	-94.1	16.8	-56	-20.6	-47.4	-240.3	-85.5	-60	-228.2	-472.6	-73.7	-152.6	-129.6	-265.8	-396.2	-94.2	-408.9	-124.8	-159.2	-217.3	-204.2	-145	-157	-89.5	-22.9	-42.8	-76.3	-133.6	-129.6
951	-145.3	27.4	90.5	-23.1	-104.2	-36.5	-22.2	31.9	41.1	-44.4	-61	-169.5	23.3	-25.9	50.1	-18.2	444.7	43.3	-25.5	-34.2	40.6	3.6	3.8	118.2	237.1	-68.4	33.4	67.4	-150.8	-405.1	-88	-33	9	67.6	-513.5	-79.7	-288.8	-118.6	-39.1	-69.3	20	0.6	-29	124.2	-38.1	22.5	-52.3	-50.6	1.5
952	-97.9	-130.9	-125.6	-136.8	-120.8	-51.7	-103.1	-119.6	-114.7	-137.2	-151.4	-161.5	-24.9	-100.7	-62.9	-64.2	-186.3	-105.4	-93.6	-81.2	-172.3	-46.4	-38.7	-40.8	-239.7	-249.6	-225.1	-9.7	-329.9	-399.8	-63.2	-190.6	-94.6	-102.3	-426.4	-56.1	-263.8	-205.1	-183.9	-173.5	-126.5	-221.7	17.4	-114.5	-159.7	-85.3	-53.7	-233.9	-107
953	112.1	48.6	63.9	46.1	101.9	110.5	64.1	34.1	114.6	54.1	81.2	120.6	94.2	89.1	39.7	43.9	82.5	49.9	71.2	42.2	89.6	65.2	103.7	24.9	143	112.2	93	122.2	143.6	135.2	27.7	55.5	102.4	53.3	155.4	73.4	101.6	79.5	136.9	34.8	63.9	180	116	44.6	76.2	81.5	106.1	89.7	41.6
954	-17.5	20	12.4	24.2	18.5	-3.5	6.9	18.5	20.3	9.4	0.6	9.2	25.2	1.3	14.2	24.6	22.3	14.6	12.9	16.4	22.8	32.7	36	30.7	51.5	44.1	15.1	33.2	54.3	53.9	-6.6	10.4	12.6	37.1	87.8	13.4	42.3	32.9	67.1	44.2	14.1	46.4	26.8	19.8	3.8	15.9	26.5	6.4	13
955	-41.2	-10.1	-29.4	29.4	-1.7	44.7	177.8	19.5	47.4	-16.1	16.1	-4.8	18.7	-27.2	-16.6	3.6	30.9	8.5	12.2	4.8	-15.2	18	40	9.9	26.5	8.7	47	53.3	-67.7	-100.3	-69.4	-25.2	0.2	-68.7	-21.3	-30.8	-0.3	-11.5	23	55.7	-29.3	10.7	-52.2	5.7	-51.7	-3	-0.2	-18	20.5
956	-450.6	15	-56.3	-14.5	-150	-6.8	-200.2	2.5	-143.5	-98.5	-48.9	-230.5	-104.1	-69.5	-301.3	40.1	47.9	93.8	-20	-5	-331.5	-51.6	-130.3	-115.9	-80.5	-162.3	-24.5	-207.4	-310.6	-854	-274.7	-98.7	-201.9	-200.7	-396.5	-187	-174.1	-104.3	-7.6	17	41	-154.2	-124.6	62.5	-227.6	-123	45.3	-55.6	-17.1
957	5	-11.8	21.1	54.7	17.8	23.1	-6.8	27	62.6	32.7	55.3	22.8	-3.8	-2.8	17.9	24.9	49.2	3.9	11	-3.5	-33	39.2	56.6	10.6	-14.5	-43.4	32.3	52.7	13.8	-24.8	-36.4	-1.5	3.7	-17.8	-138.7	6.7	-12.6	-49.1	26.5	55.8	-95.1	-33.5	-37.1	8.1	46.5	17.4	-32.9	-15.7	19.4
958	-122.6	176.4	-16.5	-10.9	-18.2	67.3	-23.2	57	45.2	6.8	27.2	-5.4	96.3	-42.1	59.6	64.5	15.5	25.7	22.4	8.1	71.4	14.8	96.4	26	227.3	158.7	25.3	142.8	11.2	35.7	-30.5	84.5	-19.1	-21.3	0.8	74.1	51.6	0.7	76	46.3	1.6	83	-47.5	83.1	11.5	119.6	17	-32.2	0.9
959	-165.6	-152.2	-106	-148.8	-229.4	-143.4	-213.7	-91.1	-117.8	-125.1	-180.8	-160.8	-148.2	-126.4	-153.2	-95	-197.3	-117.6	-121.5	-73.7	-182.1	-103	-118.7	-140.9	-199.4	-290.7	-128.1	-159.4	-262.5	-296.8	-121.6	-165.8	-172.2	-197.7	-306.2	-144	-100.8	-122.4	-256.5	-157	-223.5	-165	-218	-142.6	-133.1	-171.5	-191.9	-198	-137.2
960	61.9	87.6	154.2	84.7	35.1	113.4	221	87.4	162.5	158	160.2	144.1	188.3	88.5	70.2	24.8	88.1	157.7	161.9	87.7	124.1	69.6	98.9	142.4	257	163.8	163.8	67.4	181.6	210.4	88.2	178	118.6	92.7	271.1	83.9	107.9	141.5	169.3	134.4	153.8	146.1	106.2	127.6	168.9	114.2	138.7	123.4	145.6
961	-112.3	13.1	-67.1	-329.2	-110.8	-321.7	-452.2	-78.5	141.4	-252.3	-112.9	-285.7	-12.7	-145.3	-282.5	-133.9	123.8	-86.6	-3.8	30.6	-177.5	-49.4	-37.5	-6.4	-186.7	-339.2	0.8	26	-426.9	-259.6	-465.8	-171	-22.1	-245.6	-687.7	-141.3	-190.2	-134.1	-64.1	97.6	-192.7	-136.1	-315.5	-56.3	104.9	-355	-126	-335.3	-186.4
962	137.4	77.3	18.8	65.4	28.3	12.3	122	169.7	-3.4	88.7	22.5	10.9	31.3	29.2	53.1	34.4	12.6	34.3	28.7	62.1	64.3	29.5	37.2	35.8	-39.6	-10	60.4	41.6	41.9	-74.9	-9.2	121.7	39.4	32.2	-6.1	64.5	-5	10.5	-13	28.3	15.5	44.5	90	34.2	-6	9.2	35.4	9.7	8.5
963	-460.9	-219.8	-118.2	-161.6	-243.5	-104.6	-309.6	-106.9	-1.4	-162.6	-182	-302.8	-123.4	-166.7	-261.3	-72.3	-208.4	-147.7	-129.5	-80.2	-219.5	-169.1	-137.1	-120.2	-408.3	-306.2	-240.1	-166.1	-314.8	-377.1	-157.9	-200	-261	-272.3	-454.4	-114.7	-133.4	-206.5	-226.2	-102.6	-189.3	-252.7	-307.6	-152.2	-227	-166.1	-73.6	-307.8	-164.4
964	-45.4	100.9	74.2	71.9	87	19.4	145.2	34.4	125.9	30.5	125.2	48.4	73.7	77.9	98.3	15.2	21.1	35.1	39.7	44.9	85.5	29.6	123.7	62.4	41.4	41.1	51.9	51.6	103.1	47.4	66	97.4	16.7	124.8	132.2	96.7	39.4	158	166.8	100.7	5.6	176.9	64.7	68.7	58.5	63.2	-19.6	101.2	45.3
965	482.5	91.4	192.1	180.4	323.3	212.1	385.3	127.4	190.6	207	186.5	178.5	364.6	316.9	323.6	42.7	254.1	143.9	181.5	221.6	273.4	151	272.8	221.3	258.6	500.7	274	135.4	189.9	298.7	235.6	304.8	331.8	214.3	347.3	362.1	104.9	250.9	194.9	132.6	246.5	120.9	484.8	271.7	291.9	113.3	125.2	165.5	166
966	53.2	-13.1	16.9	7.8	25	8.8	32.3	-1.2	-33.1	-11	17.2	43.1	-10.8	-19.6	4.3	-15.6	1.2	28.2	-12.2	-7.9	-15.6	5.3	10.7	32	-34.8	-73.3	23.7	32.2	-26.5	-64.7	-73	14.3	12.9	-11.8	21	-10.8	-76.5	12	9.3	-26.5	4.5	-25.6	-35.5	-25.2	-14.2	-30	-40.5	35.7	-17
967	-28.4	47.3	-26.4	-26.1	-71	-41.4	-3.2	-40.5	-50.3	-53.1	-36.2	-24.6	-5.6	-108.6	-61.9	-40.1	-108.1	-55.8	-71.4	-61.6	-33.3	-51.9	-49.8	-2.5	-32.9	-214.9	-60.5	-21	-36	-312.9	-44.8	-40.2	-29.8	-176.8	-113.7	-75.3	-66.3	-4.2	-100.6	-75.1	-132.9	-15.4	-80.2	-34.2	-86.5	-42.6	-42	-43.1	-64.7
968	51.8	199.3	21.2	15.9	9.8	19.9	-5.8	7.4	-9.5	39.7	-0.8	20.4	45.9	37.8	32.1	31	19.1	35.5	7.9	11.2	59.2	12.2	25.3	54.7	-14.1	178.7	25.9	31.6	45.7	10	48.9	54.4	35.1	-17.1	12	30.2	67.4	-2.1	36.8	9.6	-12.2	8.9	6.2	38.7	5.4	24.8	3.2	12.8	-1.3
969	243.2	162.6	148.6	158.7	226.5	144.7	276.5	117.8	247.4	110	119.3	70.1	142	86	115.7	80.9	102.6	34.2	42.3	26.9	182.7	141.6	180.1	120.2	177.3	219.8	106	152.1	204.6	308.9	99.5	192.7	125.5	221.1	103.7	130.7	276.4	125.2	173.4	234.5	101.4	97.4	179.8	120.9	116.8	123.5	118.5	151.1	75.7
970	-86.7	14.8	-36.8	-23.8	-31.5	132.4	-199.3	31	95.9	95.5	97.8	111.7	8.9	177.3	50.4	-35.2	150.4	7.9	32.4	24.5	-80	-19.4	-30	-66.1	281.6	263	-68.2	-56.3	126.1	366.1	-24.4	-115.9	2.8	-75.5	-214.7	-31.3	73	16.7	29.7	107.3	-46.3	225.1	-160	72.2	109.6	-29.2	4.6	-34.2	22.7
971	308.9	252.7	594.1	201.4	481.4	401.5	309.3	202.3	677.7	369.7	202.5	175.8	320.8	260.7	219.4	606.4	390.4	727.2	502.5	196.4	187.7	175.4	232	186.1	413.7	132.6	214.5	253.8	314.8	583	264.7	387.4	229.3	600.5	280.1	1288.3	213.2	159.4	256.3	306.8	897.2	396.4	249.6	105.4	626.5	315.9	496.1	335.3	192.6
972	83.1	275.6	105.3	149.7	60.1	102.5	60.4	80.3	118.2	46.6	99.6	58.3	120.7	180.3	108.8	27.1	111.5	140.6	125.8	105.4	29.9	71.4	108.5	55.9	100.1	94.4	52	86.2	41.9	81.4	30.2	200	102	166.6	6.7	209.7	79.7	133.2	57.1	62.5	248.4	71.8	27.5	94.6	171.9	105.2	41.9	42.9	39.9
973	122.9	53.7	123.6	105.1	134.9	82.7	113.7	49.7	99.3	47.8	64.1	50.5	56.9	69.4	68.5	34.6	78.1	81	54	51.6	107.3	73.6	94.6	58	-86.6	157.3	49.5	110.5	71	158.5	61.5	98.8	98	119	230.3	90.6	97.9	82.8	49.4	70	92.7	137.9	101.2	77.9	83.3	115.9	147.2	76.9	63.7
974	232	127.7	181.4	166.3	208.9	261.5	241.1	154.5	195.5	111.5	203.1	284.4	175	187.2	212.8	96	112.3	83.9	63.6	119.7	264.7	186.1	248.2	146.2	254.5	144.2	219.6	192.8	390.4	161.7	171.8	171	220.5	290.6	522.7	163.2	378	315.4	281.6	271.6	163.6	210.3	310.7	133.1	164.1	175.3	135.4	182.5	71
975	83.3	38.6	38.3	45.8	65.3	60.4	70.5	37	65.4	10.6	23.9	36.6	61.5	7.7	71.2	24.6	-17.6	-1.4	58	74.9	61.4	105.1	60.3	60.1	104.4	177	74.7	51.1	38.8	70.2	51.7	20.7	54.6	37.7	71.1	106	27.4	132.5	114.7	6.5	30	-34.6	82	89.9	82.1	27	44.4	9.6	47.2
976	-93.7	20.8	-11.5	14.3	-29.7	-23.4	-2.7	9.2	-29	53.9	17	-3.2	-3.7	-17.2	-28	16.1	-2.3	-2	-13.4	-3.7	-19.1	11	-18	-9.5	-54.6	-1.6	-29.3	-6	-41.2	-107.5	-13	-18.1	28.4	-51	-4.4	-18.5	-38.3	-23.2	-38.7	-14.2	-13.9	-22.7	-30.2	-4.1	-28.1	-15	10.6	-1.4	5.3
977	-35.9	-34.3	-30	-20.4	-52.6	-21.2	-53.6	-31.7	-41.3	-37.1	-55.6	-51.4	-28.8	-33.8	-47.9	-15.2	-48.8	-31.4	-35.7	-31.1	-33.8	-14	-12.7	-22.1	-62.9	-73.1	-5.7	11.5	-30.4	-9.5	-67.2	-51.4	-27.6	-7.7	-99.8	-10.8	-56.1	-39.8	-60.5	-29.2	-53.2	4.6	-15.8	-25.5	-45.5	-23.6	-39.7	-55.8	-26.1
978	-295.8	-120.6	-271.6	-176.6	-224.8	-151.1	-313.5	-173.8	-127.9	-128.1	-134.2	-135.2	-131.7	-176.4	-171.1	-101.4	-213.5	-91.8	-86.4	-67.2	-176.2	-122	-156.1	-216.5	-321.6	-172	-205.7	-137.9	-229.4	-216.6	-130.5	-170.4	-189.9	-212.4	-352.9	-217.9	-223	-222.7	1.2	-85.5	-369	-217.4	-176.2	-111.9	-8.1	-155.8	-199.9	-202.2	-138.4
979	30.1	14.7	44.7	24.7	26.6	13.5	38.4	34	70	19.7	39.7	28.7	27.6	48.2	28.2	22.1	28.7	36.2	43	43.2	22.8	21.8	22.8	29.9	50.4	17.5	20	39.6	16.1	17.9	34.9	45	22.4	19.4	34.5	37.8	47.7	40.6	54.7	33.1	52.7	21.5	40.1	35.4	14.4	70.1	30.6	35.3	39.5
980	-47.3	-35.5	-3.2	-1.7	-1.2	19.9	-3.7	0	-3	-1.6	23.7	-8.3	3.7	-3	-5.8	-4.9	-27.1	12.5	13.2	27.9	-5.5	-7.2	-1.5	3.4	5.3	6	14.8	54.1	21.1	34.5	-3.3	-3.3	-1.4	15.2	71.6	18.7	12.6	-0.7	1.6	-18	0.5	6.4	23.8	12.9	-25.7	11.3	9.1	5.1	23.6
981	32.3	126.4	51.8	88.8	150.5	66.8	68.4	115.7	168.3	4.8	77.1	13.7	86.3	117	129	69.7	-25.9	102.9	91.3	113.4	36.5	75.4	148.9	52.9	119.3	150.8	86.6	56.4	142.6	51.5	38.2	88	110.9	103.4	141.8	82.1	154.3	209.6	183	200.7	112.9	-8.9	95.8	125.5	111.6	85.7	128.8	53.7	169.7
982	-91	73.8	102.7	108.4	149.9	2.8	43.4	29.9	17.1	12.8	15.4	-18.8	103.8	85.4	38.6	-60.9	15.1	-6.2	-14.9	0.6	6.7	26.4	56	10	-156.7	-173.9	45.4	19.8	-53.5	-49.6	-142.4	111.8	3	51.3	259	-83.9	-38.9	15.2	12.9	-131.4	72.3	43.9	31.7	-54.7	-81.9	-19.4	-70.4	4.2	-2.1
983	39.6	31.5	49.1	29.3	80.9	27.3	42.7	38.7	90.6	27.2	57.3	23.4	17.7	29.2	11.9	16.9	45.1	70.2	50.8	69.7	-0.5	22.2	19.2	27.3	14.3	53.5	25	27.4	61.7	176.7	19	43.6	71.6	66.3	182.7	58.5	69.6	60	67	37.1	41.5	-55.3	60.1	45.1	159.2	52.9	71.6	60.6	30.4
984	-220.2	-95.8	-74.1	-86.8	-210.4	-77.5	-211.6	-57.2	-88.1	-48.4	-62.9	-67.8	-117.5	-80.4	-82.8	-34.7	-70.4	-49.2	-37.9	-37.3	-83	-70.9	-71.1	-76.7	-77.2	-136.9	-96.2	-118.1	-231.6	-294.3	-66.4	-111	-103.8	-193.6	-336.2	-75.2	-87.4	-127.7	-167.6	-106.1	-136.7	-76.4	-170.4	-71.6	-20.3	-120.1	-66.8	-88	-55
985	-76.9	-55.5	0.1	-22.6	-42.6	-1.9	-61.2	12.9	6.6	19	-28	-83.4	8.7	-11.2	-42.5	-16.8	-14.9	-24.5	0.8	-17.4	-58.7	-22.6	-61.3	-22.4	-129.2	-65.2	-37.2	-91.3	-73.2	-252.2	-118.2	-32.5	-6	-104	-108.8	-15.7	-20.4	62.8	-107.9	-33.3	-63.9	-130.8	-108.2	-9.9	-12.8	-27.2	3.7	-68.9	31.6
986	85.7	-77.4	11.9	46.7	6.3	9	44.2	-4.4	-4	30.6	41	13.4	29.7	56.4	8.3	-11.1	45.3	25.4	11.1	14.4	67.4	-32	51.9	7.3	-19.5	30.6	9.9	17.7	5.9	6.7	-8.8	-22.5	-37	19.9	54.2	0.9	-30.5	51.8	-16.2	15.6	78.1	35.6	0.4	3.6	-8.3	-50	14.9	60.6	71.3
987	48.9	152.5	36.3	70.9	59.2	75.2	98	52.8	211.5	46.5	101.6	44.5	71.8	48.9	79.9	41.5	82.1	101.6	110.6	31.6	8.7	65.6	65.3	50.7	199	272.3	99.7	33.2	46.3	72.9	67	64.2	27.5	10.8	66.9	73.2	48.5	131.8	226.7	217.8	32.6	116.2	44.2	52.8	154.7	69.6	129.1	68.8	80.7
988	3.8	-7.4	-1.3	-0.1	1	-15.1	25.6	-0.4	-17.2	6.2	3.1	7.3	-12.6	-4.2	23.7	0.8	8.7	2.8	-4.4	-3.8	12.2	-2.3	-6.5	-3	7	-53	-1.4	-10.7	10.3	-60.6	22.4	7.3	-7.8	-8.4	15.6	-3.1	-34.8	-5.8	-39	-3.8	-7.8	9.6	-30.4	-3.4	-17.6	-41.3	-18.7	3.9	8.7
989	-142.1	-63	-97.5	-57.6	12.2	-68.4	-111.4	-24.9	-27.3	25.9	-58.4	-117.1	-20.9	-82.2	-2.8	-24.1	34.7	-51.3	-54.7	5.7	-89.9	-12.1	-74.4	-41.4	-209.8	-116.3	-75.5	-17.7	-185.4	-95.8	-25.8	-140.5	-4.4	-43.7	-112.5	-88.8	-153.7	-65.9	-98.1	-43	-53.2	-87	-137.6	-53.3	5.9	-117.5	-35.5	-49.7	-2.1
990	-172.9	-71.6	-43	-84.2	-109.7	-83	-112.7	-21.7	-49.9	-29.1	-85.1	-91.9	23.6	-62.6	-52.8	-21.8	-77.9	-49.2	-58.3	-16.3	52.1	119.8	-68.3	-3	-15.1	-120.3	-50.3	-66.3	-5.3	-73.3	4.9	-87.1	-53.6	-29.1	-147.8	-25.8	-24.6	-67.1	-112.2	-107.5	-66.6	-48.4	-41.7	-36	-49.2	-78.4	-80.4	-72.3	-36.7
991	257.5	141.2	82.3	166.4	212.8	171.4	228.8	171.4	433	115.4	147.8	166.2	149.7	178.7	138.9	54.7	156.5	167.3	148.8	88.2	131.9	112.6	225.9	113	354.7	266.2	184.3	178.8	219.1	383.3	151.3	167.5	171.8	214.9	279.3	164.2	283.1	159.7	286.4	336.4	128.7	189.3	220.1	179.9	332.5	202.5	204.4	228.3	172.2
992	9.9	0.7	16	14.2	39.4	24.9	8.9	14.6	41.8	16.5	2.5	33.3	23.7	37.8	9.7	9	18.9	5.6	10.1	6.6	34.9	13.2	-6.8	13.4	37.9	2.6	18.8	9.7	7	-14.8	8.2	-13.9	33.1	29.6	30.5	44.2	13.5	32.8	33.5	-15.1	16.7	59.2	5.8	13.3	-18	45.2	38.4	33.8	0.2
993	162.2	568.3	530.7	232.8	367.3	582.6	196.3	347	242.6	458.4	318.9	373.7	467	644.1	342.7	872.2	485.2	442.3	344.8	458.9	320.6	414.9	316	415.5	714.9	1679.3	203.7	438.6	714.7	1119.7	237.4	319.8	81.5	456.3	313.8	712.7	394.7	900.6	613.4	531.1	698.7	282.5	344.2	749.5	573.5	1504.1	594	434.5	237.3
994	-86.9	-9.3	9.7	-46.4	-49.9	-28.6	-140.4	-49.9	-76.3	-20	-19.3	-21.6	-24.2	-67.2	-38.7	-29.3	-46.4	-35.9	40.8	-23.5	-69.5	-52.4	-54	-2.8	-19.7	-136.5	-56.3	-31.6	-100.2	-85.8	-42.1	-58.6	-21.2	-65.3	-82.8	-34.1	-49.1	-88.3	-90.1	-20.7	-35.8	-68.9	-81.4	27.1	-6.7	-42.7	7.3	-47.3	-23.6
995	-102.9	-42.7	291.9	-29.8	-94.1	-20	-119.1	-54.9	-55	-33.1	-73.5	-73.2	-50.7	-59.7	-72.5	-21	-48.9	-60.4	-33.2	-32.6	-18.9	-56.9	-41	-51.5	-157.9	-55.6	-58.1	-32.7	-138.9	-198.5	-93.5	-49.4	-90.2	-67.5	-90	-22.9	-35	-80.4	-84.8	-69.1	-74.5	-128.9	-55	-24.4	-58.2	-60.9	-9.7	-38	-52.8
996	2537.3	2022.8	3320.5	2195.6	4865.7	2657.5	1730.9	1680.2	7330.2	2595.7	1943.5	3110.6	2883.5	2744.8	2697.5	4547.6	5511.7	1114.9	1818.4	2343.4	3868.1	2478.5	2864.7	2005.2	9153.3	7373.3	1467	2146.5	3082.4	5206.1	5543.1	2914.1	1968.9	3001.5	10509	3461.4	2824	5297.4	3431.4	2566.4	6562.5	972.2	3277.2	2117.5	4101	2711.7	3068.5	2939.9	939.2
997	-19.8	51.7	30.3	86.5	60.5	8.1	2.2	52.2	-43.2	4.3	10.9	3.6	77.7	13	67.8	7	-13.5	17.9	2.8	65.3	-17.1	-7.1	-13.9	12.9	-47.4	78.7	9.5	14.1	-18	111.4	32.8	4.3	6.8	98.8	72.1	34.5	85.4	107.6	91.4	56.9	96	-14	34	5.2	-7	121	24.9	29	14.4
998	505.3	235.5	219.7	258.6	327.2	152.9	387.5	194.5	318.4	200.7	358.3	327.3	183.7	279.2	202	135.8	258.7	146.7	193.7	164.8	331.4	216.3	258	149.5	372	395.1	234.8	323.5	283.9	385.4	260.7	236.1	247.5	425.9	561.8	243.7	335	329.4	356.5	304.7	314	316.6	326.5	215.7	247.6	231.6	164.1	317.6	185.7
999	23.6	4.2	59.7	-37.3	5.5	47	22.7	10.6	-8.4	-16.7	-36.1	-41	7.5	27.1	-1.3	-22.8	-45.8	16.2	13.6	26.6	13	-28.7	-25.4	-4.7	42	72	11.9	-20.2	-77.1	-81.1	-29.4	-5.1	-10.3	-10.2	-51.3	44.5	49.7	9.5	71.6	44.1	33.9	47.5	54.4	-7.1	-33.2	44.4	-1.3	-29.4	-30.1
1000	204.5	123	64.7	61.2	97.8	60.2	132.6	51.7	118.6	54.3	100.7	111.7	58.2	63.7	80.6	33.3	82.4	48.6	54.9	40.2	113.2	97.5	74.1	59.5	230.4	114.1	128.6	73.4	166.7	145.7	86.3	94.7	133.3	132.8	261.3	57.8	86.7	87.3	99.9	125.7	98	109.9	156.2	61	75.7	105.3	41	119	53
1001	-2	20.3	16.2	15.1	1.8	0.7	-17.7	12.8	56.9	10.6	15.5	-10.7	22.3	11.9	-6	8.8	-26.3	15.7	19.6	11.9	16.2	14.2	6.9	28.2	-12.7	14	38.9	-0.7	24.6	-30.9	16.9	-13.2	22.8	26.1	-12.8	25.2	-3.9	-5.4	41.1	40.4	5.9	23.1	25	28.9	59.9	34	12.9	-7.1	17.6
1002	-765.4	-562.7	-202.4	-357.6	-468	-433.5	-414.5	-200.5	-202.6	-175.7	-161.8	-160.5	-296	-177.4	-160.1	-193.2	-188	-186	-113.7	-44.5	-512.1	-381.6	-358.3	-333.2	-550	-328.3	-358	-428	-569.6	-566.5	-177.2	-436.7	-262.7	-459.7	-594.8	-354.4	-327.8	-270.4	-325	-117.5	-557.1	-480.5	-347.4	-213.5	-101.8	-385.5	-383.6	-238.4	-129
1003	-156	-56.4	-103.8	-39	-110.6	-52.7	-77.7	-60.8	-94.4	-10.3	-36.1	-103.3	-84.6	-74.6	-121.2	-18.9	-74.1	-31.9	-32.5	-25.7	-79.3	-63.8	-43.2	-34.3	-107.1	-191.7	-101.4	-45.5	-175.4	-259.4	-123.2	-83.8	-92	-182.2	-343.3	-106.1	-122.3	-174.7	-197.4	-66.5	-124.5	-118.2	-149.1	-85.7	-129.9	-59.8	-28.9	-67.5	-52.1
1004	49.9	117.2	23.3	74.7	32.8	70.1	79.4	16.4	15.8	-29.3	-42.2	-45.7	41.8	50.1	49.2	45.4	-35.6	8.1	-1.6	7.8	22.9	33.2	42.9	10.9	-43.1	92.9	11	-33.3	46.2	145.9	23.2	68.7	99.5	75.6	34.5	71.5	39.8	25.9	33.7	72.4	53.9	-9.7	50	7.7	42.9	69	97.8	-22.7	-3.1
1005	23.9	-25.9	-12.4	44.7	48.9	-34.7	7.2	-10.8	-38	6.5	34.1	-17.1	60.4	-55.4	26.4	20	93.5	-15.8	-14	-21.6	95.6	78.4	39.7	-10.6	-156.7	36.7	47.2	66.4	54.2	-113.2	20.9	25.8	-4.9	106.6	40.2	19.8	-53.2	-49.6	-39.9	-20.9	-8.9	16.4	17.4	-22.9	-55.3	-45.6	10.6	117	-17.3
1006	-59.5	-41.5	-47.1	-4.4	-5.9	22	-57.6	-21	-69.1	-25.2	1.8	-1.5	1.1	-8.1	9.4	-30.8	8.8	-21.2	12.4	-5.9	-20.3	11.1	4.2	7.6	-53.7	-21.9	-1.1	-33.5	-97.1	5.5	18	-68.3	-42.9	-105.5	-119.9	-6.4	-60.1	8.6	-48.1	-51.7	3.5	-8.2	-44.7	11.8	-45.1	-30.6	-49.2	79.7	-23.9
1007	-67.9	-87.5	-17.7	-10.1	-3.9	79.9	-86.5	33.9	-102.1	0	-166.6	-48.8	5.6	-18.2	-29	31.2	-47	18.2	30.8	28.2	74.4	15.5	7.8	-44.5	-72.6	28.6	-89.9	59.2	38	-87.7	-16.9	64.2	66.3	60.2	-102.9	14.1	-130.2	20	17.9	47.2	25.3	-100	39.4	30.4	27.6	-53.7	73.3	-35.5	38
1008	596.3	212	390.7	1619.8	823.1	932.9	649.5	637.9	603.6	463.7	166.6	542.6	479.4	598.7	212.4	113.5	225.6	271.9	328.2	901.2	312.8	504.9	399	214.3	653.5	199.9	207.1	431.5	380.2	461.8	347	986.9	637.3	558.1	588.5	682.2	912.3	814.7	353	797.9	431.9	178.3	784.2	157.8	563.4	361.5	410.1	626.2	1003.9
1009	1119.2	1367.1	2124.3	1282.3	1611.5	1339.8	1040.5	1317.8	4193.8	1664.7	1292.6	1571.6	1648.1	1225	1781.5	3520.7	2854.2	1158.2	1423.4	2703	1457	1394.1	1189.9	1040.7	4450.8	3402	797.1	1340.9	1204.4	2367.5	1813.5	1183.1	1377.4	1522.2	4256.8	1030.5	1669.3	2970.5	2337.6	2009.7	2917.7	794.2	1129.2	1152.3	6395.6	1349.1	3327.7	1188.2	906.1
1010	123.3	53.3	37	87.3	117.6	56.7	43.4	66	11.2	41.4	69.3	70.6	63.6	60.8	74.2	83.9	30.6	36.2	48.7	84.7	99.3	80.9	59.8	101.6	31.9	12.7	84	41.7	69.2	66.8	137.6	62.8	56.9	98.6	95.4	70.6	78.2	71.9	20.2	66.1	68.5	-43.6	144.3	87.8	36	21.8	44.6	58.6	41.4
1011	175.2	89.6	174	126.6	50.8	151.2	251.5	112.2	193.8	151	78.9	109.1	111.3	190	145.4	20	146.9	156	140.5	90	148.5	105.4	118.6	125.8	250.1	140.9	172.2	124.8	171.1	251.5	51.4	149.4	7.9	147.6	401.4	160.5	208.1	112.2	165.4	239.3	291.9	136.6	114.2	120	163.5	138.4	148	38	116.7
1012	-361	-38.3	15.9	365.6	-79.1	39.9	-256.5	-45.1	30.8	-51.3	-82.1	129.4	-31.6	76.1	3.9	27.2	44.7	-29.9	-15.1	122.5	-14.2	-88.5	45.3	8.5	-259.2	-224.1	-62.8	-89.4	-320.3	-5.2	-141.7	-123.2	4.2	-123.5	-48.3	-40.8	-200.9	-91.3	-97.1	-4.8	-39.7	-258.5	-214.7	-6.5	18	-19.8	-21.8	-227.3	41.6
1013	286.7	138.4	143.1	185.7	135.7	138.2	170.5	76.9	135.3	60.7	111.6	72	169.1	183.3	164.7	61.9	38.3	81.4	109.6	73.5	190.3	130.6	171.8	158	111.9	226.4	217.4	178.3	282.8	171.1	122.2	143.9	170.3	227.4	269.8	102.3	86.6	149.6	101.3	99.2	168.7	143.3	239	116.2	64.1	89.9	75.6	149	82.8
1014	499.9	30	86	220.5	60.3	262.9	-201	92.1	421.9	649.8	383.3	1152.1	16.6	53.7	195.8	123.3	323.7	252.2	210.6	339.2	480.5	261.8	510.5	133	511.6	46.5	602	364.9	826.3	690	-33.6	-30.8	-20	257.3	-222.4	287.3	207.2	69.1	80.1	208	186.6	237.6	31.6	40.5	268.3	285.7	294.9	286.8	413.9
1015	2	23.8	56.7	16.1	19.8	32.1	30.3	25.7	81.4	14.4	24.7	48	34.1	61.1	33.8	24.1	20.7	23.8	32.5	43.2	21.6	-2.3	23.8	11.2	18.8	45.8	27.5	22.5	120	125.9	-10.6	79.2	21.2	10	77.7	13.9	30	44.1	16	12.5	43	59.1	36.5	100	-17.8	35.1	37	52.5	29.6
1016	57	733.5	366.5	273.4	118.3	109.6	129.9	62.8	31.9	87.2	76.4	74.4	159.1	193.9	242.3	203.2	100.3	396.7	172.4	241.4	114.3	97.1	223	150.3	191.9	216.3	60.9	129	3.8	-54.6	75.2	114.3	94	181.7	262.7	301	121.2	62.4	12.2	77.6	286	32.4	68.2	68.7	159.7	133.3	257.9	41	137.7
1017	-111.4	2.4	-26.6	-3.6	-48.3	-74.9	-124.4	-29.5	-72.7	29.9	26.5	30.9	-19	-14	-12.2	-17.5	54.8	-20.8	-10.3	31	-87.2	28.6	-17.9	7.8	-138.6	-19.2	46.7	5.4	-26.4	-12.7	-54.1	-49.6	-104.2	-102.1	-101.5	-75.6	-117.7	-32.7	12	-63.1	-88.6	-87.8	17.2	-0.6	-59.8	-114.3	61.8	18.7	-17.8
1018	-74	-77.2	-60.2	-32.5	-67.1	-45.1	-102.8	-40.8	-108.1	-48.7	-51.7	-56.6	-46	-15.7	-45.4	-49.4	-67.7	-34.4	-28.3	-23.7	-16.4	-36.4	-33.9	-23.7	-224.9	-76.7	-67.4	-49.9	-72.1	-75.1	-117.2	-75.5	-83.9	-78.8	-202.5	-49.4	-45	-73.8	-69.8	-25.7	-90.2	-111	-103.4	-43.7	-90.8	-55.8	-59.8	-96.7	-36
1019	-220.3	48.1	84.9	43.9	-133.4	158.5	-160.9	33.6	255	21.4	-32.6	9.3	60.8	-5.6	-14.7	80.9	-61.4	151	84.1	89.3	-45.5	-24.7	52	-3.7	11.4	47.4	-12.9	47.2	-159.7	-41.8	-53.5	-24.4	-73.5	-98	-195.4	-103.7	79.8	10.3	-114.9	9.5	-68.1	3.9	23.1	-42.2	-10.7	108.4	77.3	-77	77
1020	135.7	17.5	55.2	-42	-104.8	-1.2	100.8	52.6	96	53.6	187.9	42.9	-15.7	67.8	-15.8	-20.5	24.6	-17.8	-6.8	-1.4	26.1	94.2	41.2	53.2	212.7	40.6	38.8	54.6	7.1	-65.4	59.6	19.9	-41	160.7	-9.3	-7.9	32.9	29	49.8	58.8	142.4	40.8	3	5.6	77.2	-20.3	48.3	23.4	64.9
1021	65.4	29	90.8	83.3	118.2	79.5	78.4	38.9	35.3	29.7	15.5	6.9	41	56	99.4	128.5	27.7	44.6	48.4	75.7	50.4	55.7	63.7	41.2	57.6	68.6	54.7	43.8	-3.1	140.2	37.8	91.9	38.3	179.4	254.3	76.8	85.4	89	81.3	75.2	34.2	48.8	97.9	-0.8	113	42.9	91.7	25.2	39.6
1022	-82	77.9	-61.9	-60.5	-115.5	-65.3	-76.7	-60.5	-54.8	85.2	-75.6	-66.2	27.6	14.8	-3.4	-57.8	-37.6	-14.8	-62.1	4.4	94.7	-9.5	69.5	29.1	-144.9	6.5	45.6	-40.1	46.8	164.9	-83	-83.4	105.1	-71.7	-204.5	-143.1	19.5	23.2	-132.4	-52.2	-134.7	157.5	-187.6	-11.6	-45.4	34.8	-51.1	-46	0.2
1023	-898.6	-433.3	-302.6	-53.3	-614	-532.2	-516.9	-308.8	-577.3	-477.3	-523.5	-755.9	-77.8	-118.5	-389	-179.9	-459.6	-234.8	-274.1	-288.7	-347	-432.4	-450.1	-84.9	-670.8	-602.2	-234.9	-356.8	-865.9	-971	-436.1	-388.7	-543.6	-621.4	-1571.1	-398.4	-1189.4	-737.9	-922	-790.9	-562.1	-571	-518.8	-229.7	-630.4	-370.2	-287	-751.1	-303.2
1024	699.7	2177.1	3081.5	1710.8	2132.5	2227.5	2504.1	1270.4	9100.2	3014.8	2679.7	3314.6	2500.6	2097.4	2093.4	3321.5	5174.5	1747.4	2313.5	2220.8	3054.2	1826.8	2156.7	1865.6	5328.5	3694.9	987.8	2203.7	1550.6	2750.8	3642.8	1732.2	2001.4	2919.5	5916.6	2621	2545.2	3602.7	3692	1803.4	3608.9	1439.8	1640.3	1948	6918.2	1488.1	4724.3	2915.3	2713.9
1025	5.4	44.6	-7.4	-13.1	-29.7	11.2	-21.9	-17.4	65.6	-0.9	-0.2	7.1	5.9	12.1	-3.7	-10.9	11.1	-18.5	-5.6	1.4	14.3	27.2	34.1	17.6	17.8	72.3	40.5	29.1	106.1	130.3	37.8	-0.5	21.2	-36.3	-17.8	1.6	-44.8	-29.2	-35.6	-20.7	-27.4	-5.3	36.4	33.8	-9.1	1.1	-34.5	21.6	0
1026	27.3	18.4	-5.8	38.2	13.8	51.5	31.3	21.3	-51.1	28	14.3	39.3	20.8	5.4	7.5	26.2	28.4	1.7	40.6	16.5	-0.3	32.8	-10.7	38.3	-45.4	-16.1	17	-21.2	-48.6	-15.4	-4.2	0	0.7	-11.2	-22.7	38.5	-75.7	6.5	50.9	-3.8	34.6	3.2	-21.3	38.7	47	9.1	29	30	1.9
1027	-104.1	-27.7	-48.5	-27.5	-29.7	-22.1	-71.7	-16	-51.8	-10.5	11.5	14.6	-74	-63.2	-66.1	-14	-15	-25.7	-28.4	-9.9	-78.9	-17.4	-19.7	-23.7	27.5	-83.4	-32.3	-4.3	-98.5	-48	-25.9	-56.9	-81.3	-112.7	-223.4	-68.9	-186.8	-31.7	5.5	-36.3	-60.4	-42.7	-72.9	-24.9	5.7	-19.6	-19.2	-59.7	-18.9
1028	621.2	907.8	1262.7	769	1080.2	1030	417	511.6	2595.6	944.2	1366.5	1158.1	798.7	755.5	674.2	1402.4	3400.3	527	935.9	1068.3	796.9	713.4	506.7	735.1	1890.9	1570.5	567.7	897.5	638.8	887	873.1	591	590.1	637	1399.7	664.3	742.1	1388.7	860.2	773.7	1559.2	787.6	672.7	829.4	959.6	997.6	1618.2	1162.4	925.7
1029	66	33.6	17.9	-3.9	-62.8	22.3	19.4	22.7	25.2	-6.2	25.4	14.2	-28	5	-0.9	-42.8	-24.1	1.8	-30.6	6.8	-50.8	-2	0	-18.3	18.7	-27.4	1.9	-16.6	0.6	-45.9	22.5	8.1	-35.1	-1.1	-19.5	-29.5	-229.5	-22.6	-7.7	30	-51.3	-27.5	-15.2	-40.8	-24.7	5.8	-52.1	10	-20.9
1030	-42.7	-52.5	-79.9	-68.6	-138.8	-20.9	-95.4	29.3	-32.6	-62.7	-9.1	-37.1	-46.9	-74.3	-57	-102.5	-65.9	-58.5	-50.5	-10.8	-86.3	-58.3	-49.7	-52.7	-25.8	-107.1	19.9	40	179.6	-161.6	-11	-82.9	-65.2	-133.7	-154.3	-88.7	-194.6	-67.7	-88.8	-6.4	-236	57.2	-78.3	-32.1	-38.7	-87	-101.7	-1.4	-4.6
1031	74.7	-46.5	-98.2	46.7	66.5	-123.4	32.3	19.5	-122.8	59.5	4	15.9	43.2	-101.4	79.9	34.4	-43.2	-70.4	-90.2	-54.6	50.3	36.8	-2.8	36.2	-125.5	-119.3	55.1	59.1	-144.1	-283.7	-55	37.9	86	67.7	92.8	-8	-337.5	-135.8	-156.1	-139.4	53.5	-225.9	-27.4	-75.7	-103.8	-123	58.5	-23.1	-27.1
1032	1844.6	1675.5	2784.5	1995.4	2560.4	2740.8	1853.5	2642.2	6475.9	2260.8	3650.1	3417	2308.1	2373.7	2024.6	5444.2	3234.2	1817.2	2632	3264.5	2757.7	2034.6	2974.1	1986.6	6283.5	4075	1702.8	2805.1	1441.5	4497.8	2615.1	2005.9	1794.1	2475.5	3907.3	2915.4	2302.5	4103.6	2883.1	3313.1	3876.5	1571	1805.8	2135.7	6452.4	2512.7	3304.8	2417.2	3101.6
1033	-43	-122.9	-144.1	-111.6	-162.6	-168.8	-71.5	-119.2	-121.2	-156.4	-190.3	-173.1	-126.4	-91.7	-102.6	-68.6	-195.9	-102.8	-98.5	-89.6	-111.3	-98	-110.6	-106.1	-180.9	-110.3	-118	-136.6	-224.4	-240.9	-209.5	-207.4	-73.6	-182.4	-89.1	-147.3	-257.6	-166.8	-160.9	-168.1	-229	-178.1	-176.8	-137.8	-150	-135.6	-113.3	-200.3	-115.1
1034	316.1	173.3	150.3	140.8	195.3	126.6	188.6	118	165.9	138.1	185.7	202	149.1	150.2	126.4	69.6	173	101.5	133	93.9	166	137.8	163.5	138.8	300.5	309.4	193.6	119.4	235.2	231.9	122.8	164.5	180	240.5	298.9	106.3	114.5	187.2	151.8	181.8	90.4	257.6	152.8	135.6	157.6	119.7	99.5	198.8	133.5
1035	-25.9	22.3	-11.2	-24.4	65	-16.6	-64.3	-5.8	34.7	15.8	10	-0.1	-22.4	9.1	-3.3	-4.7	-8.2	14.6	7	15.8	-24.6	-27.9	4.5	3.9	2.3	43.3	19	34.9	34.3	-3.2	-31.9	50.6	-43.7	9.8	-13.7	23.1	-9.6	63.6	78.3	24.6	25.1	-0.4	31.4	30.4	11.1	35.2	-4.8	16.8	-1.7
1036	100.8	132	101.3	87.3	145.3	81.9	90.7	49.9	170.8	76.1	97.6	82.1	137.2	65.2	101.3	61.3	101.5	42.4	56.2	102.6	100.8	105.4	118.2	57.7	248.2	192	71.2	106	170	133.4	100.3	76.5	100.3	133.3	52	63.9	70.8	142	144.9	135.9	102.7	135.4	101.3	36	78.4	36.4	93.5	91.4	51.6
1037	71	20.9	-18.1	15.9	-29.7	9.4	155.8	30.9	-0.2	78.4	100.5	67.3	21.7	-6.1	53.3	22.7	132.2	25.9	43.4	13.7	96.2	20.7	-10.7	66.2	61.8	-30.2	14.1	52.9	-5.4	-17.5	-46.6	29.1	-10.8	39.6	48.8	33.1	14	-12.7	-0.8	19	56.3	15.6	30.5	24	-1.4	88.7	87.3	75.1	14.9
1038	-119.6	-23.9	-30.6	-52.5	-61.4	-71.3	-39.3	-48.3	-56.3	-64.3	-44.7	-40.4	-11.1	-39	-81.4	-25.3	-58.2	-46.8	-68.6	-14.2	9.5	52	-60.6	-16.3	-4	-37.6	-47.4	-38.1	-114.4	-83.2	-70.7	-75.1	-71.8	-128.4	-155.7	-67	-37.3	-71.7	-85.5	-80.4	-19.9	-45.8	-65.4	-22.8	-65.1	-67.3	-2.3	-35.4	-63.8
1039	-462.5	-476.4	-242.1	-270	-436.8	-281.5	-373.5	-116.8	-168.6	-221.2	-66.4	-67.9	-260.8	-387.9	-419.3	-62.7	-284.4	-133.1	-233.8	-188.8	-517.3	-202.3	-330.7	-311.7	-212.9	-438.2	-217.8	-253.5	-450	-440	-443.7	-304.5	-241.9	-593	-1163	-104.8	-432.2	-32.6	-349.3	-127.1	-256.5	-261.1	-386.4	-194.5	56.8	-228.7	-130.2	-183.7	-205.5
1040	105.5	109	61.7	79.1	-12.7	57.3	101.1	66.7	108.5	99.5	97.9	125.4	76.2	51.6	108.8	61.3	106.7	165.3	142.4	82.4	49.1	27.7	71.4	67.5	245	65.9	58.6	46.1	71.5	210.1	62.7	99	153.8	182.9	213.4	91.1	126.2	43.8	34.7	107.3	157	159.9	67.2	133.2	119.8	78.1	74.4	81.9	90.9
1041	-70.2	38.7	-39.5	-13	119	-14.1	-17.4	22.4	-77	-41.2	-55.9	19.1	-18.8	-6.2	39.3	-0.9	53.4	-21.2	0.1	-5.1	27.9	40.4	62.2	-29.2	99.2	2.5	-20.6	-2.2	-75.4	-81.9	8	12.3	-50.3	-82.4	-17.9	-15.2	39.4	45.9	-25.2	-70.2	-10.5	-131	-100	-4.9	19.9	5.9	-34.1	-47.5	34.7
1042	90.1	-3.5	81.9	58	90.1	68.5	95.3	30.1	100.5	48.8	58.3	109.7	91.6	98.6	94.7	16.6	144.9	7.6	2.2	99.9	87.3	48.4	70.4	52.5	203.5	97.4	40.2	105.6	81.9	106.9	87.4	130.6	116.9	121	180.9	60.4	34.8	67.9	96.5	106.5	45.3	75.8	110.7	81.6	71.3	77.1	79.9	23.7	97.2
1043	12.5	-32.6	31.4	-72	-75.6	-83.1	72.4	-71.1	-58.7	34	37	0.1	-61.3	5.3	5.5	-7.2	-14.6	-42.9	-78.5	-15	52.8	-63.3	-86.5	-6.3	-58.6	-103.4	12.9	-3	-95.8	26.1	-29.4	-26.7	53.5	-71.8	54.6	-37	-46.6	-28.5	-14.2	-67.4	-20.3	-97.9	-43.4	16.5	-60.2	-30.5	0.7	-1.8	-83.4
1044	293.4	216.1	143.4	158.7	171.2	178.9	305.1	95.7	201.4	88.3	160.6	168.2	149.4	157.7	187.1	61.9	150.4	53.1	31.8	55.8	195.8	158.7	163.2	138.3	180.4	179.5	190.6	183.5	181.1	321.2	129.4	170.5	131.9	266.8	399.2	104.5	227.5	138	120.8	162.3	160.9	219.1	94.8	127.7	147.8	126.5	108.1	190.8	89.9
1045	-5.9	-64.7	-62.8	42.5	-57.3	31.8	-34.7	-20.8	-13.6	-23.3	-36.8	-24.6	-22.3	-116.5	47.5	9.2	-96	-18.9	18.3	-28.3	77.7	-23.2	84.2	-11.1	-0.6	-37.3	-32.1	82.5	47.2	-84.4	-116.8	-59.9	33.8	21.9	-8.3	-5.7	123.2	-38.8	-119.2	10.3	-18.1	64.6	-84.9	-62.9	-3.4	-31.4	203.7	-28.5	-26.7
1046	1663.6	543.2	558	1498.1	1358.2	1438.6	1463.4	1147.8	393.6	925.9	568.4	974.5	3039.3	2529.6	4120	1162.4	464.1	426.8	1208.8	821.6	4608.1	2501.4	988.3	4607.7	611.6	963.4	3286.8	3081.4	1582	1230.5	3718.5	2733.9	1697.1	2787.4	1189.1	1156.7	1572.6	755.8	964.5	1290.5	595.2	2396	2199.2	1463.3	1086.3	766.9	705.2	1879.6	936.5
1047	406	302.3	162.9	176	302	158.3	480.3	133.6	408.6	122.8	84.1	414.6	174	206.6	279	76.6	140.6	147.2	127.2	69.5	202.7	216.2	195.5	205.1	329.3	180.9	124	153.1	379.5	654.1	313.4	266.8	229.7	430.3	509.2	243.7	346.5	289.1	343.4	315.8	179.1	336.1	302.4	192.2	262.7	180.5	46	174.5	119.5
1048	73.3	72.5	40.5	26.2	48.4	42.6	70.7	29.1	-16.2	7.2	21.4	31.1	27.4	32.5	30.1	8.1	-25.2	25.5	-8.6	-2.2	32.4	27.7	21.7	34.6	96.8	81.2	40.4	29.2	99.8	67.3	32.3	40.6	51.8	38.6	103.5	-23	92.3	39.3	-6.2	33.9	2.2	59.4	38.7	14.7	-65	37.6	50.1	31.2	12.5
1049	-7	44.3	12	8.4	40.6	49.5	50.2	18	35.2	42.2	74.8	136.3	-7.1	33.9	-1.4	3.3	45.2	76.2	53.5	9.3	21.9	3.9	92.1	38.9	210.6	3.8	65	74.9	7.7	38.1	51.3	-4.1	20.9	-47.5	8.1	-23.2	100.7	-3.1	-43.3	19.8	-83.8	112.7	-31.9	22.6	83.5	-2.6	-10.2	33.5	37.4
1050	9842.9	11402	2513.3	3533.6	11824	11049	6813.7	5862.4	19440	5978.2	4726.6	5204.7	5547.3	5162.5	9819.2	4356.7	4895	3689.9	3652.5	3933.2	6983.6	6281.7	6207.9	6316.1	11484	14049	6054.2	12394	18686	8088.5	12683	7278.8	9954.7	7041.3	2361.8	6595.4	12458	3373	5284.2	10397	4494.2	17102	12863	5873.6	7455.7	4901.3	5536	7124.7	5473.8
1051	-184.1	51.9	-107.3	-198.8	-111.7	-40	-64.6	-172.9	-207.4	-153.6	-109.5	-153.8	-106.5	-168.6	-101.6	-63.2	-231.4	-117.4	-124.6	-82.8	-105	-65.9	-1.7	-95.3	-202.1	-181.7	-71.7	-108.7	-265.1	-624.5	-108.1	-85.4	-235	-290.4	-483.3	-108.3	-465	-108.5	-173.1	-182.9	-86.9	-143.2	-151.7	-103.7	-154.1	-281.6	-27	-109.9	-63
1052	-24.2	5.5	-2.7	-1.7	6.9	-29.1	8.6	-12.6	2.6	-5.4	-42.7	5.3	4.3	9.5	-14.2	-3.7	-5.3	-3.8	-19	0.8	31.5	8.2	-5.3	-14.4	-29.8	-12.4	3.1	-32.1	-42.6	-49	13.6	-21.3	-3	-12.2	-16.5	-41.3	-94.5	-12.9	-102.8	-20.5	-6	-66.9	-39.4	-42.4	-0.3	-3.5	-27.5	12	-0.9
1053	85.1	119	76.5	58.2	43.1	76.7	37.3	53.5	60.4	57.6	64.9	71.8	45.6	61	-13.1	55	38.1	42.9	32.8	53.3	41.5	21.8	100.7	57.9	168.9	42.5	70.4	81.4	64.4	59.3	112.9	74	79	25.5	194.6	-43.9	128	3.9	-131.8	132.1	-35.8	17.6	107.5	-2.3	-10.3	58.2	48	83.3	45.2
1054	352	170.8	164.3	127.8	203.3	162.8	354.2	150.8	316.9	126	141.5	260.6	138.4	136.7	179.4	124.4	176.5	85.5	145.4	105.4	462.7	123.9	206	130.4	283.1	245.1	179.5	252.2	274.7	323.9	210.5	219	186.7	194.5	352.8	84.2	254.5	175.7	257.6	242.8	120.7	306.2	113.4	147.7	363.1	175	146.2	233.9	153.6
1055	142.4	446.8	138	382.4	287.5	180.6	270	165.4	244.3	189.5	82.2	132.5	221.2	257.1	382.5	280.6	315.7	156	150.1	194.6	228	258.5	311.9	183.8	97.7	223.9	130.4	149.3	52.6	99.3	114.3	384.9	183.5	164.7	158.8	223.3	172.3	91.9	32.2	110.4	244.5	125.2	123.1	243.3	91	364.6	106.6	104.9	72.6
1056	6589	152.7	2324.6	173.9	42.9	125.4	767.7	5758.2	1573.7	4819.4	123.1	5444.2	1018.1	383.9	5753.3	7029	274.5	4026.9	4166	1492.3	1014.7	565.6	14.1	2958.2	366.9	36.1	1798.2	4133.8	7211.1	8459	1429.5	105.5	10792	203.5	5593.5	434.5	17533	5191.3	1424.4	431.4	4667.7	1634.6	5651.6	2365.7	162.6	490.5	7907.1	5129.2	4386.6
1057	90.3	28.3	144.4	61	176.4	61.9	57.5	78.6	-9.8	244.5	91	138	139	135.5	198.6	71.2	100.3	41	76	43.8	233.8	96.6	22.1	344.6	39.1	176.6	227.5	117.5	118.9	152.8	63.7	186.7	189.4	218.6	-69	95.7	165.4	93.4	40.8	53.6	138.5	163.5	58.6	82.2	46.6	87.9	114.4	158.2	95.2
1058	200.6	33.8	7.9	12.2	-9.8	24.7	96.9	356.7	3.4	42	16.1	203.8	28.5	17.5	32.1	23.2	24	13	33.2	13.5	117.4	9.8	22.5	28.2	8.8	69.6	7.8	44.2	137.7	14.2	63.7	15.2	189.1	22.9	1.5	41.1	0.7	30.8	44.8	28.3	25.4	46.8	46.9	27.5	179.7	21.2	21.5	31.9	37.3
1059	-294.2	-196.3	-10.5	-92	-309.1	-192.6	-187.2	-27.3	-173.9	70.3	-42.2	2.4	-58.4	-186.8	-242.3	-25.2	27.8	-28.2	-38.7	-153.8	96.2	11.8	23.3	19.4	463.4	-90	-195.5	-148.6	-238	-111.5	-130.4	-180.8	-148.8	-233.7	-76.5	-55.1	-263.5	-306.2	-485.3	-165.6	-82.3	45.2	-185.7	130.2	-185.6	32.5	-162.5	85.2	-131.7
1060	-8.1	7.7	85	17.5	37.3	22.4	-34.6	57	107.6	50.5	32.5	37.7	51.9	61.4	62.1	15.1	43.8	56	42.7	40.4	48.3	12.1	67.9	36.8	12.3	24.4	79.7	54.8	114.7	126	32.5	71.8	60.6	59.9	79.4	-3.6	34.9	81.8	76	45.1	19.4	88.5	78.7	61.9	73.2	34.9	22.1	37.3	56.2
1061	356.2	519	362.4	449.9	278.7	261.5	394.1	314	132.1	517.2	326.6	349.2	205.5	186.5	234.7	372.3	321.1	331.4	311.7	565	239.6	256.9	360.8	295.6	331.7	282.9	264.3	343.3	340.2	238.7	345.7	346.3	317.3	283.7	356.6	228.4	367.8	303.2	253.4	194.8	183.3	444.2	179.9	220.8	199.9	173.5	182.8	231	238.7
1062	203.5	324.9	365.8	283.3	245.2	345.2	257.2	228.1	212.8	273.5	399.9	249.5	269.5	259.2	252.1	289	246.5	368.4	350	230	309.1	388.7	324.8	355.6	891.5	611.5	367	420.3	443	448.6	176.5	320.7	296.2	356.6	383.7	254.9	254.7	661	470.4	328.5	399.1	391	157.5	272	304.3	311.8	276.2	212.6	347.7
1063	147.2	170.5	69.6	140.7	70.6	184.3	258.9	90.1	58.5	47.9	189.8	220	201.8	160.8	60.7	12.5	168.8	104	203.5	72.7	157.6	124.8	79.9	54.2	449.2	337.2	233	131	199.1	140.9	137.3	189.9	45.4	127.3	254.9	95.9	217.7	200.6	231.3	298.6	117.2	170.6	141	179	221.5	114.4	42.1	177.6	181.7
1064	-62	50.1	238	40.4	94.4	-12.5	1.2	120.1	-4.9	47.7	20	65.6	414.4	280.1	63.9	59	65.7	77.8	32.2	-8.8	258.8	117.5	123	147.4	6.5	185.1	21.7	159.9	18.3	34.1	71.3	116.5	70.7	341.1	-25.9	41.9	-20.1	16.1	152.8	-44.8	474.7	36.9	188.2	310	89.1	64.6	75	118.9	187.9
1065	844.8	1595.2	382.4	3553.1	2296.8	3083.4	2792.4	2776	1113.5	1350.4	68	1301.3	156.9	1461.6	1933.4	688.8	372.6	1844.8	479.7	2147.1	1322.3	1183.5	2245.9	732.8	609	226.8	924	1128	1852.2	1680.2	1984.3	871.1	1678.6	824.2	876.9	1153.7	2657.5	595.8	925.2	1343.4	625	683.4	2049.8	392.3	493	1274	467.4	1635.9	3959.3
1066	25.7	8.3	30.9	14.3	22.7	29.3	74	1.1	41.9	19.9	37.5	46.3	7.6	16.5	12.7	23.8	13.4	19.2	-17.7	20.4	25.6	21.1	39.7	13.8	57.5	20.2	24.8	27.9	-8.4	99.4	3.9	-7.3	9.9	50.5	34.5	33.4	3.4	21.2	21	28	32.2	2.9	8.8	13.5	42.4	54.1	13.6	30.8	32.1
1067	-33.8	-49.8	-32.5	-4.9	-53.9	3.5	-22.8	21.6	-52.8	-35.6	-53.1	-6.4	40.7	16.3	11.6	1.3	-66.2	-57.4	-24.3	1.2	67.5	27.7	-34.6	39	-9.5	-58.1	9.5	3.1	30	-69.7	-23.8	-8.2	-31.4	-48.4	-76.1	-42.5	4.6	-25.9	-49.6	-61.3	-63.4	-28.8	5.1	28.4	-61.6	-31.5	-32.5	-53.8	-35.4
1068	366.3	177	495.4	612.4	269.6	324.3	545.7	343.2	261.3	610.7	229.2	298.4	1744.2	1220	2883.5	623.1	153.6	269.5	584.7	207	761.6	475.4	426.6	2341.8	379.1	556.7	1196.3	725.5	647.2	425	920	1706.1	1668.2	1157.5	652.4	649.6	421.5	557.9	741.2	438.8	308.6	298	247.6	928.4	458.7	335.8	312.4	312.5	377.1
1069	-51.1	54.2	15.6	29.5	-17.5	24.2	-81.7	2.6	26	13.4	35.3	29.9	-43.2	22.3	-46.9	15.2	30.9	10.3	-10.5	19.8	41.9	22	29.4	44.3	74.9	24.8	10.3	-14.8	30.1	55.6	-87.2	-18.2	-4.7	43.3	-8.4	-32.5	-66.9	-15.6	-11.9	49.3	-115.7	67.1	-6.8	-6.8	37.4	7.3	0.9	44.6	-6
1070	931.1	414.3	500	429.3	1139.8	1270.8	672.6	520.1	1937.3	367.2	683.3	444	565.4	700.7	581.5	411.2	384.1	331.6	453	409.7	564.3	488.9	624.4	445	708	1850.7	660.2	1045	1212.8	2560.6	1027.5	1008.2	1344.3	592.8	1781.7	626.2	1659.1	697.9	1124.9	1485.5	484	1912.2	1264.6	650.2	1191.8	1109.3	951.1	910.7	632.9
1071	143.4	57	78	75.1	143.5	117.5	189.2	40.4	119.5	51.4	72.4	81.3	112.9	99.1	93.7	36.5	67.3	74.2	33	42.3	86.9	89.3	116.6	91.1	177.2	138.4	112.1	149.7	210.9	192.8	85.8	103.4	130.2	173.1	222.2	83.1	194.8	105.5	48.2	99.6	90.1	154.3	137.9	92.1	90.4	102.9	80.7	89.9	57.2
1072	161.6	173	235.3	157	216.2	124.3	139.9	115.1	233.8	168.6	238.6	240	163.6	164.9	106	136.2	347	143.6	102.3	92.5	134.8	186.4	165.1	112.8	142.6	241.3	171.9	246.1	124.6	117.9	79.4	202.2	68.6	135.3	189.1	322.5	323	187.3	149.4	284.6	254.2	189.1	200	235.4	285.3	275.9	224.8	155.4	128.1
1073	89	107.1	110.8	21.2	-8.7	1.2	-13	49.5	78.3	12.5	99.9	30	-38.3	86.5	-13	49.7	73.9	69.2	31.9	18.6	32.7	49.5	16.1	10.5	200.9	100.5	6.6	-2.3	-18.7	151.7	60.7	42	21.9	-12.5	36.3	66.8	230.4	92.4	5.7	48.9	39	97.3	-2.4	11.1	81.9	90.9	34.9	90.5	14.5
1074	723.7	849.1	1308.4	809.6	598.6	735.9	1105.4	819.2	1064.5	1302.2	835	1139.2	1322.4	1282.5	830.6	811.8	2647.9	1549.8	829.1	1151.2	1476.2	1373.7	1039.9	1105.3	1527.3	1538.3	864.5	903.5	1342.1	1265.9	1275.6	1573.1	1372.4	1604.8	1114.3	1084.5	1041.8	938.6	1701.1	939.6	1281.8	771.7	980	1356.7	1802.3	1089.6	663.7	1273.8	1146.8
1075	-4.6	-36.1	-10.2	-3.9	11.4	-50.1	-17.6	-51.4	-57.6	-14.7	-13.2	-25.9	16.1	13.6	-5.5	32.3	25.5	-42.5	-33.6	14.9	18.6	-6.2	-8.3	3.7	-18.7	-60.3	-28.1	-36.5	-3.9	-84.4	25.3	7	-63.1	38.5	-7.3	11	-51.3	-30.2	11.3	-66.4	2.4	-39.2	-10.2	-19.3	-22.8	-32.3	-13.5	-21.8	-40.1
1076	84	109.9	100.8	124.4	172.7	217.2	169	97.7	322.5	110.4	96.7	48.1	242.5	191.9	221.6	73.6	117	92.5	96.3	151.2	309.3	143.2	153.6	338.7	120.6	246.6	293.1	238.5	182.3	166.3	239.1	252.3	208.4	341.2	223.2	145.7	262.3	119.1	301.3	218.1	100.6	226.3	173.4	92.7	234.9	140.9	132.8	190.8	110
1077	358.2	219.2	246.3	380.2	357.2	270.7	171.2	194.2	488.3	213	298.6	219.3	355.6	337.8	322	181.6	291.6	125.7	181.6	152.3	355.6	315.1	351.2	227	480.9	305	133.2	325.8	386.7	201.4	305.8	301.8	253.9	341.8	532.4	214.8	209.6	191.5	204	123.4	197.4	198.2	284.7	165.3	290.2	175.2	249.2	200.3	264.8
1078	258.5	433	459.2	238.3	176.8	261.9	247.9	160.5	350.7	146.3	115.5	290.4	254.6	277.4	273.4	174.1	323.2	399.2	246.3	374	344.6	214.9	266.5	221	277.1	357.5	312.6	256.1	255.8	285.4	258.7	301	228.5	499.8	515.6	368.6	341.9	212.4	507.1	284.4	493.1	198.4	211.5	230.8	451	354.1	394	172.8	307.1
1079	435.6	523.2	53.7	-39.7	310.4	2826.2	484	6278.7	-119.6	482.4	2863.3	560.7	259.4	342.4	604	258.6	-123.8	778	11.6	72.3	135.5	298.6	204.2	2417	-180.2	-198.6	2579.5	9928.6	11760	254.3	345.4	854.6	1881.4	-51.7	-308.3	-56.7	-104	-177.2	143.1	-84.7	-87.8	12007	768.8	4239.1	-178.1	563.6	-28.9	2668.5	1427.4
1080	63.2	43	25.3	48	52.7	135.8	82.7	59.3	46	15.5	-17.1	-0.9	143.5	127.7	197.6	47.1	26.6	37.1	40.8	11.2	395.4	159.1	36.1	273.7	71.7	-31.1	236	264.7	181.2	56	388.9	159.3	3.9	113.2	-5.9	22.5	96	16.6	-58.1	161.6	-62.5	50.7	621.7	24.8	-2.5	37.8	11.7	228.4	230.5
1081	59	132.6	123.1	103.8	66.5	131.7	11.8	75.5	95.6	108	191.4	92.8	85.9	97.6	70.6	216.6	159.1	160.7	128.3	74.7	93.6	89.9	142	196.7	79.3	122	70.5	101.9	62.3	5.2	59.3	75.3	88.6	50.1	54.2	127.1	61.6	147.5	148.7	73.5	202.8	115.1	0.3	105.7	162.7	340.7	147.2	45.8	69.8
1082	655.5	489.2	1458.6	595.4	836.8	903.6	673.2	616.3	1326.2	806	1281.8	1032.1	865.6	801.2	666.1	1385.4	675.8	566.4	663.5	594.4	1161	859.2	782.4	886.1	2119.5	1818.9	714.1	711.8	619.6	824.1	1278.2	883.1	673.2	1002.8	2414	788.6	534.3	1313.9	880.1	708.7	1118.8	542.6	577.9	744.2	1837.3	719.4	460.9	888.9	727.3
1083	-16.5	-9.5	137.7	57.5	146	142.5	59.6	54.5	92.6	50.6	16.5	-46.5	220.2	150.1	167.5	22.6	17.6	43.8	50.3	6.9	144.5	18.8	171.5	101.1	221.2	97.4	-2	223.4	61.8	278	-8.3	148.4	147.6	202.4	6.8	115.9	99.9	82.9	102.2	-76.7	83.9	213.3	157.6	83	70	50.7	115.7	47.1	30.9
1084	624.4	216.8	143.8	156.9	209.3	210.1	280	162.5	184.8	202.2	315.9	311	152.5	172.2	209.5	89.8	347.5	206.8	193.6	166.3	186.2	199.6	239.4	158.9	499.6	353.1	307.7	165.1	321	340.1	186	190.4	101	165.9	292.7	187.8	237	249.7	253.8	117.8	113.9	302.6	215.5	214.6	250.6	240.9	236.5	345.2	160.9
1085	243.5	669.7	246.6	227.4	276.1	232.7	737.1	749.8	556.2	153	91.1	117.4	614.7	292.3	370.7	61.7	87.6	465	112.1	160.6	741.1	768.2	262.1	656.3	164.4	247.2	277.9	243.2	145.5	236.8	405.9	489.8	304.6	400.1	403.8	264.3	158.5	170.4	1069.9	184.9	345.2	495.9	361.3	1320	-41.9	216.7	90.4	322.4	411.3
1086	478.1	499.2	370.7	314.9	536.8	396.4	439.3	286.1	671.9	158.8	258.6	285.1	344.7	442.5	501.6	464.5	270	342.6	1320.9	690.9	388.4	322.4	345.4	378.8	655.7	660	416.2	563.1	545.1	767.4	439.3	364.5	1053.7	376.6	892.8	256.9	2791.7	443.8	703	1096.9	520.5	591	361.2	452.8	919.8	507.3	1249	367.2	307.5
1087	25.5	48.8	52.1	23.4	48.4	46.1	15.7	23.3	59.6	14.2	19.8	14.7	70.5	25	23	28.8	38.6	22.2	29.1	34.5	11.3	33.3	40.8	10.3	-145.5	86.2	19.9	19.8	-25.3	41.2	11.5	22.7	21.1	35.9	25.7	54.4	44.6	45.4	18	27.2	67.2	66.6	43.3	26.7	31	29.6	34.9	16.4	14.7
1088	862.6	336.8	681.8	1522	1536.7	757.5	651.4	911.7	117.2	962.1	493.8	523.8	356	875.5	438	572.3	403.1	628.9	738.7	1426.3	596.6	517	985.5	304.1	263.4	261.1	1023	638.6	1054.2	573.7	1492.5	389.3	1202.1	621.1	776.9	1097.1	2091.5	1098.8	308.3	1473.2	515.9	364.1	1258.1	284.5	1659.6	847.9	3218.6	936.6	868.4
1089	-45	-63.2	75.9	8.3	-16.5	43.3	37.1	19.6	-69.9	86.8	-8.2	88.9	30	-2.1	20.4	81.1	51.1	52.4	63.7	112.1	-29	29.5	-4.1	-25	-79.9	-54.7	71.4	22.5	-46.8	-113.4	33.4	7.9	34.4	53.5	-142.2	37.2	-34.8	30	-47.3	-25.5	52.9	83.4	-47	-3.8	-37.5	21.2	7.2	-24.1	93
1090	960.2	1396.4	1939.1	1190.4	1811.6	1559.6	659.1	1212	1685.6	629.1	1135.1	804.4	1638.2	1473.5	1206	3405.4	1530.2	1278.3	1180.3	950.9	1722.9	1664.4	1827.8	1153.9	4211.6	2298.8	736.3	1608.7	1062.9	1477.4	1192.8	1072.2	896.6	1196.7	1369.8	1696.9	1041.1	1270.3	550.2	1216.7	1887.2	1088.9	1236.4	1604.4	2004	2057.5	1176.7	777.4	854
1091	-104.4	0.2	-55.8	-35	-81.6	-29.7	-108.4	-10.5	-43.2	-10.6	3.7	-15.3	-47.1	-36.3	-114.1	5.6	-21.8	30.3	12.8	14.5	-64.3	-11.7	14.7	-41.9	-51.3	-79.5	-36.1	-34.4	-94.8	-166	-47.4	-140.3	-122.6	-31.7	-282.6	-144.6	-89.1	32	-29.8	35.3	-42.2	67.8	-151.5	-2	10.2	-2.1	28.4	19.4	7.4
1092	265.6	1057.3	1155.4	548.1	228.5	174.3	339.4	465.3	137.6	469.9	251.5	151.7	1386.4	868.7	224.7	262.7	1251.6	1406.9	273.8	113.9	863.1	1073.5	486.3	529	603.1	1130.3	275.4	712.5	464	223	324.8	864.6	501.3	1307.5	1772.1	530.8	97.9	379.7	408.2	198.7	859	315.5	534.4	1846.5	162.8	484.3	200.6	833.3	747.5
1093	18.1	-2	27.5	21.7	8.7	36	15.8	20.7	46	18	43.9	23.2	107.6	46	13.5	-13.1	28.5	34.9	36.6	6.5	88.4	17.3	8.8	79.3	-12.9	39.8	59.7	29.8	53.2	33.4	-2.1	50.6	14.9	62.3	-5	-3.3	-8.6	15.8	29.1	31.5	24.9	27.2	58.1	235.3	44.7	36.7	9.1	46.3	20
1094	287.2	105.5	149.1	138.9	118.8	147.8	281.2	92.4	159.4	140.4	76.1	91.1	197.7	119.7	128.7	17	87.3	119.3	89	52.9	118.4	115.6	199.7	121.5	232.4	208.9	177.5	133.8	249.7	269.6	96.9	100.3	-43.6	99.4	241.7	-0.3	90.3	155.1	182.8	137.7	9.3	180.3	161.4	136.6	147	131.6	39.8	72.1	71
1095	43	38.9	57.9	0.7	9.4	-8.5	37.9	53.3	155.9	41.9	26.5	26.3	70.9	45.8	43.8	41.1	46.9	49.9	62.8	51.9	43.9	34.2	16.8	59.7	54.5	116.2	29.1	-1.1	35.7	-42	2.7	51.3	10.1	47.1	55.8	94.9	1.3	41.5	74.4	-3.4	144.9	-6.6	46.1	78.4	65.1	37.9	33.3	10.6	29.9
1096	687.2	497.3	166.1	263.7	307.5	463.5	268.5	801.6	116.9	127.8	195.9	397.9	269.4	320.3	992.8	289.8	168.8	780	369.7	439.8	254.5	152.1	393.5	202.5	169.5	101.7	288.2	276.9	673.2	361.4	460.1	357.8	1005.5	142.5	175.9	226.6	1312.1	241.7	155.7	695.4	244.3	137.5	778	205.9	105.8	330.9	626.2	504.5	1107.6
1097	24.7	36	10.8	1.5	-18.9	35.3	29.8	24.7	3.9	34.4	14.8	17.7	5.1	33.6	29.2	2.7	36.7	11.7	9.5	16.8	-18.5	6.1	41.6	25.7	88.2	28.3	-4.6	37.2	96.4	154.4	3.8	23.1	-17.8	14.2	-8.8	26.7	72.4	3.9	83.3	-33.3	18	134.3	29.6	9.5	10.8	63.6	1.1	13.4	34.1
1098	1162	329.7	148.7	342.2	185.4	281.2	308.4	704.8	49.5	344.3	885	702.1	143.7	372.5	179.5	1702.3	259	181.6	1355.6	821.4	225.9	322.4	187.3	181.2	110.6	109.8	599.3	325.3	930.3	1039.2	325.5	529.1	572.3	287	105.8	167.5	1402.3	247.3	226.8	1112	52.3	380.6	381.2	300.7	240.9	361.4	567.8	294.6	473.5
1099	229.3	616	130.9	176.2	196.1	357	306.5	507.9	242	323.8	332.6	207.9	259.3	291.6	358.7	395	154.9	373.6	297.2	458.9	160.9	174.8	167.3	213.6	118.4	131.1	207.6	148.5	296.9	250.9	241.9	219.6	221.1	302.9	103.8	365.8	276.7	243.8	168.3	232.4	185.7	357	238.9	110.4	130.4	529.6	345.2	262.2	234.6
1100	-18.6	-1.2	-11.5	-6.9	8.1	-31	-3.1	3.2	-76.8	-9.7	-16.4	-5.6	11.8	0.1	-16	5.4	-12.2	-8.9	2.5	-3.4	39.5	16.6	2.4	24.4	29.3	-20.2	6.4	6.2	-55.3	12.2	-4.6	15.1	5.2	20.7	-21.5	8.2	-31.2	-11.7	32.9	-9.8	30.7	-2.6	44.7	10	13.9	-24.9	-9	-5.6	-9.5
1101	6999	9233.4	2544.8	3995.2	6817.6	4745.3	6212.8	5392.1	917.3	7400	5695.6	4950.3	3426.8	3086	4054.3	2343.5	886.3	3866.4	3869.2	3465.6	5644.9	5000.5	6281.2	6618.4	1112.6	1510	6470.5	7294.4	12315	9138.7	8652.3	5904.7	6976.7	3800	524.8	2246.3	9669.6	2033.1	1705.3	2028.1	2605.8	8670.7	10054	4387.5	1268.5	4047.1	4395.2	6298.3	5070.4
1102	64.7	76.4	276.6	221.5	152.1	95.7	13	63.8	207	42.2	112.6	42.7	208.2	138.6	155.8	48.9	179.7	194.2	85	89.4	79.3	110.2	110.7	70.7	141.4	191.7	88.8	67.9	86.7	207.6	19.1	197.7	72.5	216.9	48.7	362.9	111.7	89.6	104.5	98.2	241.4	100.4	65.2	106.2	221.5	74.6	108.4	72.4	45.1
1103	-126.5	-3.5	-43.5	-21.5	-76.3	-9.6	-121.2	79.8	-100.4	-22.2	-95.2	-82.5	-14.1	-22.2	-5.1	19.9	-26.9	-31.6	-53.7	-13.3	-54	20.6	-15.2	-42.1	-176.4	-104.2	-79.4	-61.9	-86.1	-134.6	84.3	0.9	-55	-54.7	20.7	-22.7	-177.6	-24.3	-86.4	-33.9	-62.5	-141.8	-12.7	113.8	154.4	-78.2	-41.5	-35.7	27.6
1104	-94.9	61.6	172.5	312	-11.8	-11.2	87.8	330.8	41.2	60.5	39.8	1	116.3	70.2	233.1	-11.9	-6.7	361.4	88.8	59.9	231.8	330.6	293.8	88.9	-93.3	50.4	114.5	141.8	222.3	-159.2	58.6	30.3	-5.4	77.1	-70.4	188.1	58.5	-12.5	38.7	42.4	124.6	134.5	297.1	81.5	-79.1	111.2	159.4	221.1	342.2
1105	25.2	4.4	177	49.8	56.8	55.3	111.7	73	42.6	29.8	40.6	22	79.4	88.7	24.6	21.7	19.1	35.8	8.3	12.2	25.9	215.1	36.4	58.8	52.8	58	29.9	101.1	132.7	110.3	68.3	45.6	37.8	39.7	125.4	53.9	20.2	63.5	50.5	124.7	51.3	63.2	135.9	133.3	56.4	79.4	14.4	24.5	9.6
1106	78.7	-33.1	-15.4	43	-20.4	-5.3	25.6	3.1	-63.4	-9.6	-0.5	-36.4	32.8	-18.1	-38	-10.1	-13	-19.1	-0.7	-12.4	5.6	30.1	40.7	14.5	-81.5	-546.6	1.8	12.2	-75.3	-584.4	-179.9	-45.7	38.7	-205.9	-83.6	-97.9	-151.7	-164.2	-145.9	-214.8	33.6	30.1	-204.5	45.2	-61.9	-51.3	11.9	-30.6	2.6
1107	14.2	-21.7	1.6	-5.5	7.7	16.5	-0.5	3.5	-3.3	0	-3.4	2.7	4.2	6.1	9.7	5.7	4	7	1.1	0.6	37.9	-6.1	17	12.8	-10.7	-10.1	12.2	-6.7	4	17.7	31	4.6	-2.9	12.7	29.8	4.2	-29.4	9.4	-21.5	20	12	11.2	19	-10.4	-14.6	6.3	2.5	-11.5	-0.3
1108	115.3	72.8	187.8	111.8	122.2	42.7	77.3	142	23.2	41.7	50.9	73.5	279.5	82.9	135.5	101.6	88.5	111.3	74.2	21.8	154.8	94.1	119.4	145.5	153.8	236.5	143.8	157	75.1	280.1	132.2	135.6	133.7	164.5	166.3	90.6	136.6	91.8	274.3	76.6	227.1	109.3	220.4	381.2	175.2	174.6	91.2	180.6	139.3
1109	625.9	1162.3	142.4	2189.4	356.2	148.2	497.8	696.5	241.2	984	30.8	749	762	263.8	721.9	458.1	189.3	392.5	295.3	-2.5	1823	1107	2311.3	1621.2	-51.7	248.9	2112.9	679.9	2891.7	374.6	933.1	603.5	1199.1	844.9	-236.1	379.3	8581.6	-18.7	381.2	202.8	373.2	537.9	1979.5	417.2	128.5	23.6	126.5	1155.1	3053.3
1110	536.7	790.8	1167.5	642.2	490.2	677.7	785.6	1135.7	943.3	1190.3	935.7	927.3	727.8	832.9	688.2	1124.6	1837.1	2096.4	962.4	719.7	813.4	731.1	497.1	656.7	788.6	706	697.6	988.7	793.6	756.9	785.9	1042.3	676.8	679.4	529.3	766.3	949.8	486	1035	936.4	839.8	673.2	625.5	731.3	861.8	1368	986.2	796.7	824.2
1111	67.9	30.6	59	39	91.1	89.7	36.2	70.2	103.6	39.3	69.4	102.6	65.1	87.8	81.6	44.7	96.5	60.2	86	64.1	18.8	48.2	-7.4	133.1	59.2	25.4	38	36.5	-58.5	-75.5	18.8	60.2	7.7	53.6	43.7	96.1	161.4	66	171.1	-6.8	117.3	-21.5	30	40.4	26.7	64.4	72.6	117.9	67.1
1112	26.2	2466.7	585.1	390.4	287.4	54.3	783.4	358.6	550.8	389.8	996.7	607.8	160.6	2.8	-44.9	2336.2	185.8	1004.9	343.1	435.5	49	-57.1	281.5	293	83.5	-210.2	55.7	409.5	505.9	813.8	414	371.6	67.4	-350.8	-19.2	639.8	395.6	286.7	2904.8	1557.6	150.5	542.5	-52.9	246.3	-126	1582.4	329	99.1	403.7
1113	185.8	230.9	392.9	575.3	193.3	288	188.8	349.9	181.7	437.7	168.6	278	1023.2	971.8	745.9	541.8	1590	606.9	358.5	221.4	900.2	441.5	372.6	868.9	467.2	1227.7	613.3	560.3	608.6	274.8	463.8	527.2	650.7	890.3	341.4	174.9	373.5	150.7	1094.5	764.7	265.1	478.5	495.7	1150.4	275.1	888.3	140.4	346.8	360.8
1114	-91.8	-61.6	52.2	21.7	-6	-36	49	-59.2	62.5	47.1	-60.2	-79.7	19.8	-81.8	-65.8	11.6	-42.6	-61.3	1.5	-21.8	19.8	-38.1	-9.3	-51.4	-188.8	-5.1	-85.6	-91.3	-4.4	16.8	20.7	-63.2	-62	-90.3	105.7	20.6	18	-59.8	37.2	30.5	6.3	-49	-7.3	17	-65.2	-99.3	-30.8	-71.9	-62
1115	-90.3	-21.7	-0.5	-14.6	-97.5	-8.4	-85.2	-42.4	156	74.1	41.3	70.4	7.9	8.1	29.2	-16.2	1.2	46.5	29.2	-14.9	10.6	-9.6	-50.8	-10.5	-25.5	64.2	37.8	-42.6	-141.2	-66.4	4	5.1	82.2	21.6	-98.1	-30.1	-11.9	-50.7	19.6	79.6	-194.3	33	-1.1	80.9	89.8	1.9	-127.7	-205.9	-53.8
1116	259.6	64.9	143.5	287.5	138.4	249.5	412.6	449.1	134.2	201.7	168.8	187.1	211.1	238.5	314.2	585.9	159.7	260.3	294.3	416.9	180.5	145.3	141.6	188.4	85.4	120.5	260	335.1	402.5	423.7	326.3	302.3	323.9	185.7	202.6	214.7	273	347.1	258.9	128.9	274.9	188	177.5	149.4	217.8	389.9	273	139.6	390.1
1117	83.4	15.7	-15	245.3	-45.3	76.5	623.7	38.2	258.8	6.9	36	37.1	166	333.3	460.7	108.4	-1.3	106.4	96.5	108.8	137.6	67.7	241.2	215.2	279.7	619.3	298.6	6.5	572.9	547	472.5	154.4	354.5	476.8	975.4	83.7	236.6	16.8	593.1	234.3	-58.4	83.4	363.4	291.4	50.4	130.7	95.5	-21.6	190.5
1118	349	231.4	220.9	288.3	110.4	81.9	573.7	375.7	94.9	256.7	81	157.9	147.3	146.2	143.8	189.4	116.3	1087.4	165.2	147.2	276	161.9	92	142.6	171.2	1644.5	144.8	80.2	135.6	175.3	113.8	318.3	544.4	190.9	264.6	692.9	100	155.2	68.3	114.2	173.1	260.3	246.9	123.4	73.8	149.8	141.2	206.1	137.8
1119	213.3	160	441.3	455.4	362.1	233.1	242.6	156.6	208.1	495.5	336.8	298.9	331	265.6	317.8	414.4	1280	260	270.6	342	173.1	234.1	245.9	188.9	344.9	257.3	147.4	79.2	314	373.4	449.6	303.7	217.4	153.7	619.3	667.9	65.5	327	285.1	-29.9	448.5	115.7	293.6	254.3	420	226.1	384.2	144	247
1120	307.8	1598.3	607.8	263	155.6	481.2	111.6	227.3	952.8	983.8	525.5	290.6	1320.5	415.1	434.7	312.3	3104.5	252	914.6	75.5	379.1	1181	260.5	471	1716	188.5	273.8	652.4	231.1	332.8	248.3	436.8	436.4	610.9	3626.6	1169.4	272	77.8	850.8	850.9	1040.4	637.9	546.1	273.7	935.7	453.1	310.4	535.9	347.4
1121	314.1	119.5	268.1	166.2	364.7	74.6	295.3	134.9	135.5	226.1	103.5	146.4	214.6	82.8	229.3	275.3	60	157.3	165.5	340.8	107.3	132.5	121.9	120.3	144	190.8	85.6	124.9	294.1	162.8	233.9	151.6	288.2	152.7	161.7	262.3	256.6	223.7	238.1	391.4	180	205.7	85.8	76.1	74.2	113.1	233.9	56.5	104.6
1122	-14.7	-10.4	0	36.8	-35	-35.3	-4	12.7	-22.8	8	14.3	58.5	4.3	-35.8	-28	29.6	1.8	-10.2	3.8	14.6	-13.6	1.5	4	26.2	53.1	-25.2	3.8	15.4	-13.4	81	-31.7	-32.1	-60.1	-35.2	-74.8	-36.3	-74.8	-4.3	-136.8	-43.8	-22.4	-106.7	-17.7	-43.2	-21.7	-23.1	21.7	0.3	32.7
1123	-48.3	26.7	-1.1	14.9	10.5	8.8	-0.5	7.7	0.3	4	4.1	-4.4	3.7	-2.3	-1.1	18.2	15.9	5.3	0.3	14.1	4	5.3	-2.8	1.3	35.7	-43.1	2.7	5.2	-11	22.5	19.3	13.5	-4.7	18.5	-23.4	-3.7	25.1	6.9	37.8	-0.1	18.2	28.4	11	-2.5	2	6.7	11	12.6	-3.5
1124	-58.6	250.6	112.9	94	51.6	127.6	71.8	99.3	28	4.9	37	3.4	-26.5	-84.9	-48.7	23.2	17.9	143.9	150.4	62	0.7	45.2	166.4	87.5	-170	-111.7	-21.2	119	-15.4	-256.3	-114.3	50.6	71.2	25.8	-129.3	10.5	50.7	43.7	94.1	109.4	-25	-1.6	46.4	72.2	12	99.3	122.5	-23	93.1
1125	921.5	858	1191.3	1406.4	795.6	859.8	492.7	1059.7	614.5	970.1	1226.8	1187.5	658.7	1319.2	408.8	1529.5	1028.3	1066.9	741.8	400.4	736.1	958.1	1176.3	628.1	540.2	738.6	713.7	1165.9	1233.9	1086.7	1086.6	1483.8	792.7	2436.4	631.6	2477.7	1143	883.1	317.5	1093.9	1131.6	1830.2	983.3	524.2	560	1430.7	1053.6	764	432.9
1126	215.7	2.1	93.2	151.3	152.2	131.9	210.6	61.7	273.5	126.1	216.8	154	135.4	127.4	158.3	106.8	123.9	81.8	56.5	73.5	110.7	104.7	128.2	94.6	247.1	153.1	133.1	126.5	138.9	168.1	136.7	73.2	259.7	135.9	335.6	147.7	33.4	148.2	202.7	151.1	111.9	195.8	122	108.8	196.8	128.3	145.2	104	117
1127	804.3	2727	2132.7	1247.6	267.5	2975.4	1411.9	1068.2	896.7	3096.9	2956.3	1482.7	915.8	539.7	873.8	1657.3	2522.5	2092.5	1005	1256.8	877.2	926.5	942.3	822.2	728.6	5666.8	814.8	1100	703.1	2043.6	565.5	2067.8	1169.4	1565.1	490.4	847.6	1402.9	1145	1097.4	781.5	1333.1	1382.2	841.4	946.6	852.6	1718.5	1069.8	1277.4	1555.7
1128	-109.2	35.6	-32.1	34.9	-53.9	31.2	17.8	58.8	146.2	-11.7	95.2	-4.7	35.3	-17.7	-75.4	31.6	-17.5	17.7	-11.4	22	-59.6	17.3	87.9	-71.9	180.5	12.3	75.8	-44.6	-169	65.5	-57.8	-134.1	45.2	-213.5	-358.4	-161.8	89.7	28.4	20.5	54.8	-143.5	119	-43.4	-11.9	73.9	28.1	99.6	-14.5	82.8
1129	2.5	-1	37.2	82.1	24.7	30.4	9	41.4	7.1	18.6	76.8	17.4	42.6	47.1	11.5	0.4	13.6	34.7	-4.9	0.7	13.9	36.3	12.1	17.2	49.2	143.6	14	43	-6.8	-25.8	26.5	46.2	29.2	62.9	-43.2	52	-15.7	46.3	40.3	-7.8	33.7	20.3	45	33	0	-15.7	9.8	26	37.8
1130	171.3	453.1	140.9	264.3	165.5	249.4	330.5	281.5	75.6	146.3	275.7	208.6	215.6	152.5	247.2	405.6	244	264.5	223.7	266.4	205.4	100.4	179.7	216.6	-98.9	35.4	127.1	160.7	167.7	245.4	242.7	380.9	219.2	285.8	389.2	250.2	202.2	114	62.5	375.9	243	48	266	146.7	62.9	211.7	-64.1	263.4	149
1131	183.7	236.9	227.9	31.5	168.8	186.4	153.3	175.7	14.4	80.9	87	152.5	55.8	60.6	93.7	121.1	42.5	465.9	225	112	136.1	98.3	261.7	81.1	2.7	-8.5	105.7	5.4	92.5	18.2	72.6	185.7	45.5	51.7	25	141.8	90.9	53.5	62.3	110.4	113.4	17	106	76.9	64.6	175.6	262.1	148	191.9
1132	2338.4	1476.8	2817	2706.5	1219.3	2206.9	2248.6	1468.6	5411.3	2802.6	3385.6	2171.7	1663.9	2305.2	1660.3	3305.8	4451.8	1481	2229.5	2979.7	1239.8	2318.2	928.3	1715.4	4185.8	2323.5	1371.3	2095.7	2144.1	1993.7	1172.8	1443.1	1296.6	1882.5	4806.8	1575.2	2193.9	3386.4	3251.4	2327.3	2428.7	3144.5	1060.2	2126.1	2713.2	3057.5	3719.4	1285.6	1645
1133	215.6	152.6	141.3	126.4	92.2	185.9	161.7	61.7	153.4	133.4	166.5	100.4	127.1	158.9	168	61.4	164.6	91.2	96	95.3	130.4	113.9	165.2	93.4	282	214.5	107	101.6	254.2	246.9	147	91.3	186.7	90.6	235.9	140	183.8	123.8	159.2	155.4	105.6	76.7	102.8	82.9	132.2	120.3	158.5	202.5	105.7
1134	-6.3	-11.7	-10.9	-20.5	-31.6	-15.5	-25.3	-23.7	-6.6	-11.6	-28.3	-24.7	8.5	6.5	-12.2	-5.3	-33.6	-0.8	-3.6	-1.5	4.1	-16.8	-11.1	1.8	-50.2	-42.3	5.1	3	38.1	-40.3	0.1	2.8	0.7	-25.3	-4.1	-28	-22.4	-0.7	14.6	-5.1	-18.4	-33.7	19.7	114.6	2	-4.1	-25.9	-16.4	1.6
1135	52.6	84.2	85.6	70.3	81.6	84.2	38.6	83	132	27	35.4	18.4	75.2	88.6	83.9	166.9	44.9	28	62.8	68.7	117.5	86.5	71.3	94.7	79.5	51.7	66.1	64.3	78.2	83.4	57.2	57	69.4	109.9	124.4	65.5	-19.5	89.7	71.5	104	108.4	1.5	66.8	113.6	96.6	143.5	82.5	52.5	8.7
1136	-197.3	1735.5	-23.5	1108.2	712.1	7372.1	6118.6	4036.6	-78.1	363.7	-116	-6.5	8	506.6	887.8	-48.5	-155.8	1872	-143.7	-35.5	3451.4	427.3	4151.6	2043.5	-73.4	123.1	523.2	1192.3	1332.7	827.3	1548.4	821.8	39.6	209.8	-194.8	357.8	19.1	172.4	27	-68.8	-186.9	3480.6	6784.8	49.7	21	424.1	-221.3	1739.8	4571.4
1137	-35.6	49.6	-32.7	-57.4	-43.2	-14.9	-49.4	-29.5	28.3	-4.5	-11.8	-4.8	13.8	-38.1	2.7	-12.7	27.4	-0.7	-29.3	-4.3	12.4	-27.9	-13.1	-40.7	-12.5	-42.9	-17.4	-43.2	-66.6	-25.9	16	-20.5	-38.6	-53.5	-32.1	-24.1	-1	-43.7	-28.9	-37.5	-34.4	-38.2	-46.9	7.9	23.4	-12.8	-23.6	3.9	25.9
1138	8.6	100.2	156.2	35.1	63.8	-3.5	38.7	68.7	33.8	74.4	34.6	109.5	352	53.5	48.7	33.1	602.2	44.4	31.8	19.6	333.9	312.6	48.7	157.3	231.3	116.2	45.2	253.2	98.3	-17.1	60.6	79.1	112.7	336.7	149.4	25.6	87.6	35.3	346.6	30.4	517	35	56	457.6	73.7	87.7	71.5	67.7	49.6
1139	-64.5	39.7	-15.6	0.6	-35.2	-12	-62.7	-51	-20.6	-43.9	-37.3	-72.4	29.3	-62.5	-38	-26.6	190.4	-4.3	-9.3	-34	-40.2	-33.7	23.1	-2.7	9.9	-100.2	-20.2	-18.4	-167.2	4.7	-94.5	-122.6	-60.9	-51.4	5.8	-27.9	-23.3	-60.9	4.3	7.2	-42.7	5.1	-140	-46.2	88.6	-21.5	-27	-32.3	9
1140	21.3	-28.3	0.1	1	-5.4	2.7	13.7	-0.7	5.7	-13.2	-9.4	-9.8	6.4	-6.6	-8.3	6.5	-7.8	-13.5	-7	-15	13.4	7.5	0.4	-12.4	50	-43.1	-5.9	-22.1	-49.1	-8.1	10.2	-16.3	-25.2	-6.1	-6.1	4.4	122.3	-2.3	-30.3	6.7	6.7	-11.3	-13.1	-2.7	-1.3	-13.7	-3.4	-10.2	-28.1
1141	-33.5	-50.5	-20.1	-21.1	-45	-30.8	-9.1	-6.6	-18.3	-8	-6.6	-5.7	-19.4	-25.7	-10.3	-18.1	-26.2	-17.9	-7.7	-17.4	-19.2	2.5	-20.5	-28.4	23.7	-105.4	-41.2	-55.5	-69.2	-44.2	-17.5	-19.2	-32.8	-38.7	-50.2	-20.6	-120.5	-20.9	-30.8	-31.9	-20.7	-52	-35.6	-6.1	2.3	-23.1	-53.3	-29.4	-33.2
1142	792.7	171.2	495.1	570.4	226.2	579.1	283.1	429.3	143.3	402.7	293.3	302.9	80.6	510.8	438.8	191.9	108.9	934.9	328.3	387.7	241.9	233.2	134.9	98.3	83.6	66.4	372.1	234.2	443	175.2	244	243.1	632.5	195	167.9	707.7	640.4	387.6	-5.1	178.9	233.9	209.1	426.9	178.5	192.9	449.9	591	405.5	365.3
1143	-143.3	-142.8	-64.6	-17	-219.6	-85	-117.4	30.3	25.8	2.2	1.2	47.8	-84	-29.8	-3.8	47.5	6.6	-18.7	0.6	7.5	-120.4	-34.1	-24.8	-64.3	-65.8	-169.6	-2	-46.8	-177.4	-138.2	-109.7	-261.6	28.1	-189.8	-217.8	-15.7	6.2	-45.4	-60.4	36.7	-158.9	-14.1	-262.8	2	55.4	-54.3	155.2	-20.8	16.8
1144	54	206.7	185.9	196.4	50.8	141.5	117.1	106.2	91.4	142.6	195.4	105.4	237.2	188.2	97.6	35.2	166.8	112.7	146.9	126.3	153	170.8	68.6	133.5	186	113.4	62.9	63.3	72.8	167.9	211.5	125.5	223.9	192	155.1	156.5	34.1	130.2	278.9	91.7	233.7	-1.3	82.8	78.4	202	62.4	137.1	74.9	217.3
1145	345.4	356.4	401.3	319.4	209.4	210.3	251.7	194.5	543.3	143.1	210.4	174.9	279.6	237.9	244	268.9	526.4	252	255.3	130.9	278.9	303.3	196.1	291.9	259.9	326	290	263.8	419.6	305.7	214.5	403	352.7	340	429.8	243.9	222.4	190	215.6	201.1	417.4	236.1	354.8	347.1	289.2	267.2	286.3	198.3	158.2
1146	3.5	21.6	40.8	52	-68.7	-14.4	22.4	-0.7	17.5	-29	-9.9	-61.6	3.5	19	25.1	-14.9	12.8	57.1	19.8	27.1	21.7	24	-9.1	43.7	167.6	79.4	76.3	-29.6	62.7	33.1	-72.4	-69.2	-28	-54.3	63.9	-96.5	-17.7	-49.1	-53.6	71	-88.5	24.4	-65.5	-34.3	84.5	-17.5	-54.1	-86.8	-27.7
1147	294.6	216.7	210	193.1	284.5	227	282.2	108.6	351.8	151.1	181.1	166.1	213.5	299.1	283.7	162.5	332.6	192.9	147.3	147.9	304.9	189.8	262.2	267.9	296.6	249.6	239.1	280.2	439.7	360.9	175.1	24.7	116.7	352.7	448.3	111.1	536.7	228	267.3	201.5	229.7	164.6	254.1	240	301.9	377.7	169.5	184.9	26.3
1148	-7.4	179.4	1.9	-2.9	23.8	-7.4	32.4	3.2	-14.2	-1.3	5.8	-3	11.9	-12.4	32.8	7.2	1.3	-15.6	-16.1	6.9	4.6	-6.9	2.6	15.4	-32	-25.3	-4.1	27	-17.4	-2.7	-13.1	3.7	-5	17.4	-5	-4.9	-16.5	15.5	1.3	15.6	-10.2	0.8	-7.2	-3.2	-12.7	17.6	3.5	10.9	12.7
1149	4123.7	469.7	329.9	283.3	4617.3	1207.6	197.7	3585.7	249.3	1328.2	1123.4	2331.1	402.4	623.4	398.5	2661	86.1	1300.9	2398.1	1923.7	1510.9	1866	1037.8	1489.7	791.9	658.9	3684.2	1502.6	3423.4	685.2	1546.9	1758.1	1184.7	268.7	248.4	222.7	1539.8	349.9	179.8	275.7	209.3	1695.6	2255.7	976.2	218	356	430.1	2317.1	1025.8
1150	-52.4	-171.3	75.5	6	17.9	59	-29.8	71.3	81.4	-0.1	67.1	58.3	27.8	78.1	7.3	75.8	175.6	21.6	61.2	72.9	28.5	10.5	-52.7	37.4	-162.1	-99	-1.2	11.4	34.3	-5.2	-15	37.4	78.9	-52.8	-20	-3.3	-24.7	5.7	5.7	-14.5	49.4	-49.9	29.1	27.2	45.8	16.8	63.6	48.9	77.3
1151	-49.5	-31	23.1	22.2	-56.2	-43.4	-31.1	-1.7	-70.3	35.9	-40.5	-36.3	15.6	45.4	15.4	9.2	-49.2	-3	47.3	4.6	-25.2	2.2	3.7	20.6	116	29.7	23	11.7	88	-24	26.7	3.7	-72.3	-8.2	-61	-58.9	169.4	-1.5	57.7	57.8	-139.6	-2.1	-16.4	8.8	30.2	121.5	27.1	-48.8	9.8
1152	64.8	136.1	13.6	58.2	23.6	73.9	93.8	74.7	174.6	63.7	226.5	120.6	43.5	52.3	47.3	59	171.1	88	89.6	68.7	23.8	55.8	94	63.3	354.3	4.9	64.6	123.9	25	34	31.8	-2.4	90.3	73	28	49.8	62.4	35.9	74.4	134.7	-86.4	244.7	-17	51	132.6	74.3	45.1	144.2	105.5
1153	60.2	35.1	29.5	31.9	20	4.1	65	17.3	64.7	17.6	17.9	13.1	9.6	32.9	31.7	6.3	41.1	24.8	19.6	20	33.5	19.2	26.8	9	26.7	67.7	37.8	23.9	25.2	53	33.4	29.9	78	15.1	53.9	45.9	118.8	45.3	68.7	29.8	41.2	84.9	71.2	23	39.2	45.3	17.6	20.5	8.5
1154	6.1	303.1	378.1	575.9	138.1	177.1	-31.5	183.4	142.8	0.2	-7	-7.3	274.4	363.3	100	361.6	40.8	424.5	267.2	362.6	89.7	59.9	393.6	93.6	328.6	105.2	-18.4	198.9	30.5	97.9	8.2	500.5	169.2	491.1	9.7	1129.1	544.7	173.2	98	236.6	243.3	149.8	23	35.3	182.7	43.2	502.2	-35	96.8
1155	173	120.5	103.5	91.9	71.6	114.1	122.2	76.9	169.4	91.7	145.4	89.7	105.7	78.3	76.3	312.7	66.7	112.9	104.9	121.9	98.1	192.6	56.2	91.7	107.8	84.8	69.9	192.7	122.3	124.6	69.6	46.8	17.5	89.5	116.8	88.4	119.7	71.6	131.5	205.6	89.9	128.5	78.3	155.5	95.5	303.9	128.2	117.7	78.6
1156	165.6	193	104.7	73.6	48.8	103.9	103.7	109.3	224.5	150.4	177.2	159.9	62.9	120.8	108	140	169.1	111.9	198.3	108.3	106.5	162.1	148.1	124.6	95.6	108.1	123.4	165.4	402.2	267.3	143.6	95.7	143.5	114.7	76	112.2	152.7	147	259.5	118.6	51.6	267.1	245.3	169.2	143.1	144.4	245.5	253.9	302.7
1157	8690.8	19213	5445.2	4847.8	11635	16967	9251.6	6261.7	29989	6985.5	5024.5	6355.4	6142.4	7697.5	9615.8	6217.9	6907.3	4433.8	4538.2	4121.9	5496.1	7927.9	6268.1	6108.2	33455	16455	5862.2	15430	24797	19410	16087	9678	9643.1	9325.1	17053	9776.3	22828	6702.4	15516	14348	5482	21277	12501	7085.9	14029	22025	8004.5	6221.7	6326.1
1158	-1.7	28.8	-7.2	0.8	0.4	27.1	-10.2	1.9	-14.4	31.6	39.9	-7.1	0.8	1.6	-3.8	0.2	6.3	-3.4	5	15.1	-25.1	-12.9	11.4	11	35.9	20	-22.7	11.1	-5	16.4	5.3	-16.3	-3.9	10.5	29.8	2.4	77.7	20	42.6	6.2	6	10.3	17.8	14	43.7	12.7	15.3	33.2	10.3
1159	-107	-26.6	9.9	-28.2	-26.3	-32.6	-89.9	-3.7	-10.8	17.8	34.7	-21.9	7.1	-55.3	11.2	3.1	-30.2	10.3	6	13.9	-74.1	-40.2	-82.5	-51	17.1	75.8	-69	45.2	-76.6	-156.2	-63.9	-28	-74.4	-44.8	-50.1	-23.8	-9.4	-55	3.5	33.6	-26.1	-1.3	-97	-32.6	36.4	-54.1	0.6	18.9	1.4
1160	131.9	85	35.3	70	88.2	64.2	86.3	23.9	64.3	56.8	45.9	82	61.1	71.8	53.1	11	65.6	51.6	53.4	43.4	23.6	40.5	8.3	43.7	3.1	165.4	78.6	45.8	43.7	103.6	28.4	74.9	84.3	97.7	197.3	78.8	64.7	51.6	38	6.2	50.4	64.3	97.8	9.9	28.5	86.6	30.8	65.7	44.4
1161	228.4	70.4	-39.6	141.2	455.5	209.7	236.8	736.5	162.7	450.2	106.6	826.1	250.2	474.7	230.4	591.8	36.6	855.7	118.3	784.6	234.9	239	319.9	51.6	35.5	54	409.2	285	741.2	285.6	179.5	538.8	546.7	103.4	445.7	469.3	1010.8	381	59.6	508.1	-19.4	264.5	415.6	60	41.4	703.8	625.1	417.5	337.1
1162	1790.7	3873.8	3179.5	3694.3	4055	3708.8	4884.1	2622.9	5787.4	3374.5	931.4	2412.9	1292.9	4838	2686.9	1607.1	3967	2825.1	2992.2	1205.1	2071.5	1636.5	3002.4	2658.2	5225.4	3230.4	1530.7	3490	2005.2	1268.8	1770.9	6448.1	1373.1	3563.7	2934.2	6094.1	4236.1	3809	4831.2	2477.7	3991.2	5414.8	2205.4	1096.7	2405.1	5868	4455.6	1573.6	1883.7
1163	98.8	-18.5	-51.7	-29.5	108.8	68.9	123.5	-0.7	-66.8	41.6	-50.7	-36.2	-21.7	-4	-32.5	-14.9	-5.9	-23.3	-19.4	-34.4	-5.7	36.6	-0.5	-23.3	16	-40.5	20.3	-25.9	5.5	114	61.3	26.2	29.7	155.4	175.3	30.9	33.1	-17.6	-13.2	-29.7	32.4	76.8	110.2	-11.3	-66.8	27.1	1.2	68	-25.2
1164	169.4	392.3	290	558.2	521.2	753	1313	1812.6	36.4	1046	622.5	371.4	435.6	648.8	270.3	23.4	-0.1	825.1	214.5	29.4	1233.8	242.1	3192.2	699	299.7	471.8	498	873.9	912.9	173.9	1126.5	1239.2	637.5	376.2	13.5	1025.6	363.1	602.1	81.5	115.8	269.5	2764.1	1788.3	73.1	67.6	1753.9	130.6	1126.1	408.1
1165	-51.8	-22.8	-9.3	-25.2	-20.6	-23.8	29.6	16.4	25.9	-5.8	26.6	-8.6	-16.6	-15.3	-8.4	1.8	8.2	7	5.6	-6.1	-52	-35	-2.1	-35.3	5.2	28.4	-34.1	11.1	15.6	10.4	3.8	15.2	-7.5	7.6	-12.2	2.2	21.9	14.6	-9.6	12.3	11	-32	-21.1	6.5	112.2	13.9	-4.1	11.4	-30.4
1166	293.6	273.6	138.5	171.9	439.6	218.2	168.3	196.1	200.8	135.9	206.5	105.4	298.7	216.5	267.4	160.8	387	324	139.9	147.7	246.8	364.5	189.8	245.5	128.6	189.7	213.5	193.2	213.3	50	96.7	281	115.4	288.3	182.2	421.6	151	125.9	265.6	146.5	243.4	201.6	139.9	208.3	208.9	159	91.8	170.1	114.5
1167	7125.2	15843	5308.2	6452.3	13343	17914	9005	6251.7	3592.9	7872.2	6381.7	7785.1	5976	9367.4	9552.4	2428.9	2741.2	4493.6	5260.5	4107.4	6468.1	4577.6	9113.5	8770.6	3181.3	20855	8217.8	12980	18486	18459	13572	6565.9	11723	10040	8779.2	8737	19590	7912.2	14871	5443.3	5837.2	17742	14019	6436.2	3652.7	7256.5	4999.1	7464.7	8007.9
1168	30.7	8.9	-3.3	33.9	-20.7	-38.6	10.3	9.8	17.6	64.4	54.2	55.9	-3.9	28.5	-10.3	-4.5	3.5	22.3	27	-1.1	8.9	-25	34.7	22	-137.6	-36.5	26.1	11.7	-22.9	-63.1	30	25.4	-55	25.4	-20.3	24	-0.4	13	-6.2	-13.8	13.4	-47.1	25.9	18.3	-48.6	1.4	-12.8	56.8	32.7
1169	82.5	110	50.2	44.8	61.7	14.2	80.3	79	16.7	75.7	112.5	87	84.1	71.6	26.1	50.5	120.6	98	69.1	50.5	63	22.6	87	82.1	41.9	36.2	90.1	76.7	34.1	119.7	58.3	93	87.6	141.4	35.2	81.5	162.3	113	72.2	58.1	62	70.1	125.1	64.3	66.2	73.4	63.2	115.6	92.7
1170	60.1	-62.4	-71.8	-4	52.7	27.8	62.5	17.3	62.4	106.6	43.9	144.9	22.8	-36.6	60.9	-1.6	66.9	-49.2	27.3	54.5	117.4	27.9	16.2	79.9	-103.4	26.1	143.8	46.6	-15.2	-113.7	-14.8	17.6	38.2	-0.8	100.3	30.7	137.2	68.1	31.6	-11.6	37.2	-56.9	-19.4	183.1	-16.4	-9.9	43	71.2	64.1
1171	188.5	161.9	140.3	75.2	159.8	71.2	159.8	99.2	193.2	86.6	109.9	98.6	123.9	125.9	146.7	83.2	186.8	147.6	105.9	55	136.9	98.4	114.8	126.9	173.3	142.9	121.5	110.2	200.4	226.9	70.4	134.2	150.3	161.2	170.5	101.8	142.1	153.4	250	112	127.4	68.2	189.3	206	82.6	164.1	102.2	161.2	113.5
1172	139.1	29.3	49.5	64.3	59.7	54.4	88.9	38.2	50.5	153.4	106	103	58.5	51	71.2	20.3	153.9	80.8	50.3	36.9	44.3	38.9	36.6	55.1	78.4	32.9	32	13.5	-15.9	131.1	29	29.6	90.3	34.1	122.2	72.4	10.9	61.5	91.6	74.3	75.3	21	29.3	24	31.3	60.1	55.8	111.9	56.3
1173	195.8	552.3	875.7	174.3	173.3	145.9	315.6	279	64.8	297.5	221.1	327.1	831.7	280.4	291.7	241.9	455.9	325.1	285.1	85.9	613.4	426	258.1	593.4	562.5	332.6	283.6	558.4	381.4	486.5	600.2	333.9	461.3	686.4	121.1	206.1	402.6	319.9	326.4	244.5	1110.6	223.2	406.8	720.6	356.7	515.9	349.1	817.4	443.4
1174	122.9	143.8	55	71.4	66.4	96.2	158.7	86.1	188.6	249.7	201.5	183.4	70.4	103.9	121	54.8	212.7	129.9	107.9	65.7	40	90.8	36.6	103.5	96.6	82.4	111.6	154.4	119.9	193.5	80.6	90.4	284.9	209.1	409.1	96.9	101	69.4	50.6	92.1	28.1	64.8	178.2	171.4	148.7	121.7	122.9	178	36.5
1175	-122.3	-53.7	-27.5	-24.2	-21.9	18	-54.9	-58.6	-55.2	-73.2	-22.4	-12.6	-65.1	-48.8	-13	-28.9	-78	35.3	21.6	31.8	-59.7	-11.5	29.7	-7.8	-165	20	52.9	23.7	-18.2	-165.3	0.5	26.6	49.5	-43.1	-241	-47.3	-68.7	-74	-46.4	-21	-93.7	-37.4	30	-35.3	7.6	-31.8	-67.6	-29.2	53.6
1176	473.1	3310.1	1458.6	831.7	501.4	1296.3	1400.6	854.2	854.6	724.3	645.5	516.6	721	1204.5	496.7	424.7	709.6	3174.6	864.7	427.3	697.6	654.5	530.7	974.5	1509.4	466.1	719.7	735.1	815.4	360.9	588.1	1262.3	568.5	691.8	586.3	675.3	668.4	758.4	483.6	596.9	2272	740.8	430.8	721.5	227.7	2081.4	607.6	561	1105
1177	-140.3	11.5	-26.6	-9.9	-102.2	50.3	-7.3	-45.2	104.5	-35.1	28.3	48.7	-36.6	-61.5	-4	45.2	32.5	56.7	40.3	12.5	-81.8	51.1	-51.3	-59.8	-15.5	-95.2	-60.9	-23.7	152.5	76.9	16.1	-4.8	88.7	-70.4	-73.3	73.1	103.5	110.2	71.2	141.3	18.2	74	36.5	76	3.2	126.4	-12.6	63.5	20.2
1178	533.9	379.7	239.6	260	416.3	386.4	395.4	831.1	374.9	398.4	175.3	201.9	311.7	271.3	658.9	396.2	102.5	226.6	324.9	433.1	481.7	352.3	334.5	324.1	270.9	157.6	326.7	353.1	493.9	552.2	397.2	340.3	177.2	282.6	212.2	842.2	502.7	439.2	644.8	351.5	504	755.3	605.6	507.6	319.4	216.6	586.5	232.9	288
1179	-39.3	-7.4	-21.5	-14.3	-34.8	-38.2	10.7	-20	-20	-1.5	-64.1	-18.4	-11.8	-44	-39.2	-18.8	-83.4	-29.6	-16	-21.6	20.8	-3.1	-11	-22.9	-40	-25.3	-25.3	-42.6	-19.7	-143.6	-45.7	-56.4	-38.7	-77.9	-154.8	-45.4	-69.8	-44.3	-21.1	-10	-45.8	4	-43.2	-45.4	-18	-44.4	-23.5	-80.6	-17.2
1180	80.3	96.8	100.9	104.3	92	89.7	135	86.6	41.8	81.3	128.4	228.6	98.5	81.4	78.4	62.7	81.5	95.7	73.2	74.5	114.7	108.8	89.1	79.3	42.2	95.6	101	91.9	35.3	187.2	95.1	85.4	114.4	118.5	-65.1	75.3	67.3	128.3	120.1	157.7	36.6	190.2	104.4	81.6	92.7	138.2	79.6	100.4	100.2
1181	290.1	314.6	193.3	241.1	379.6	401.3	327.6	468.1	336.9	333.2	364.6	212.5	237.2	346.6	126	317.1	342.1	459.7	87.1	104.2	347.3	203.2	447.7	160.4	177.9	221.4	248.3	274.2	610.8	626.6	157.4	334.2	405.5	207.1	153.9	373.8	264.7	200.5	188.8	151.9	146.3	325.3	257.5	58.1	64.8	413.2	253.4	392.4	281.2
1182	15.9	-0.9	15.7	6.1	-12.4	19.5	27.9	4.3	23.2	-5	-9.3	2.7	28.2	-8.8	-2.8	21.7	1.3	-8	2	13	19.4	17.7	20.9	10.6	-30.6	19.4	10.3	52.8	46.8	-35.4	-12	9.5	-13.7	-12.8	-23.6	2.8	-11	-5.4	5.6	-10.1	-9	1.2	9.8	5.5	43.1	-2.4	0.4	-30.4	-4.8
1183	-160.3	20.3	-24.8	-63.5	-76.6	-41.6	-97.8	-24.5	-23.3	-62.9	-81.3	-72.9	-25.1	-30.8	-12.7	-1.5	-95.3	-37.5	12.4	-33.1	-94.7	-62.5	-18.4	1.8	-13.2	-39.8	-25.7	-12.3	54.2	-69.5	-32.2	-80.6	-42.2	-91.6	-149.5	-114.4	-25.3	-49.8	25.7	7.1	-54.7	-11.3	-22.8	-22.1	6.9	-21	6.9	-83.7	-20.7
1184	-182.2	40.1	29.8	-92	-42.3	-134	-203.1	18.3	247.4	93.9	12.1	44	155	-86.8	4.3	13.8	65.5	26.2	74.6	1.2	69.3	-0.9	-61.9	54.9	-28	40.9	-18.1	106.6	18.8	-360.3	-121.9	-172.5	-110.7	-239.9	-308.8	10.6	-250.5	63.6	118.9	14.7	59.9	-4.5	-45.1	52.6	166.9	-5.1	216.2	174	37.1
1185	49.8	29.5	-12.8	0.5	25.8	-3.7	32.2	7.4	-0.5	16.1	-4.9	-12.2	-6.1	-43.9	15.5	5.5	-15.8	-27.9	-17.5	-5.3	-4.8	-7.2	0	-15	16.1	10.8	-5	21.8	28.9	19	23.4	-20.9	23.8	-25.8	76.9	-18.7	-5.8	18.9	-9.4	-10.7	-25.8	-19.1	15.3	8.5	-18.3	11.9	-2.3	-22.6	-3.9
1186	-22.7	2	8.3	6	66.3	24.4	32.8	32.5	-8.8	3.4	3.9	-0.5	26.6	-0.7	-8.8	34.3	-34.5	4.1	6.6	40.1	16.3	-0.6	-2.2	7.6	28	23.7	27	7.5	48.6	5.2	29.4	5.1	3.1	11.2	-14.6	3.6	-10.8	52.2	14.7	50.3	52.1	34.2	39.9	18.2	22.3	44.8	17.9	0.1	24
1187	-53	64.7	55.8	35.7	39	98.9	30.4	45.4	162.9	22.8	105.9	-56.9	118.7	47.8	57.7	14.2	-8.2	81.7	37.4	13.2	68.3	68.2	103.9	57.8	256	89.9	28	80	29.1	-78.8	-16.1	36.1	46.3	66	-102.1	1.7	81	53	11	88	-23.9	203.9	44.5	55.4	113.1	45.3	73	107.7	59
1188	412.9	663.9	293.7	655.7	467.7	466.2	140.8	232.5	281.9	269.6	284.4	309.9	195.3	520.6	416	610.1	354.5	327.3	456	310.1	353.3	256.7	375.1	338	268.9	286.3	264.7	398.2	441.1	401.8	378.9	593.6	365.6	192.3	201.4	285.6	316.2	203.9	195.6	318.4	346	277.5	275.9	247.4	204.2	399.9	346	302	328.2
1189	-31.7	17	-3.4	-6.5	13.5	-6.5	-26.1	18	5	-11.8	-31.6	0.3	-10.8	3.3	12.6	17.7	10.3	9.1	5.1	29.3	-3.8	5.3	49.2	15.2	20.3	-15	1.5	-6.8	-1.5	8	12.5	-15.1	2.2	3.4	-1.6	23.1	26.8	8.6	21.6	-27.8	0.7	27.4	-22.2	-13.2	20.4	12.2	28.6	-22.7	-1.6
1190	-68.6	-24	129.8	-36.7	-117.4	17.3	-85.4	49.4	17.1	14.1	53.2	-23.3	42.7	-29.7	-0.2	78.8	37.2	72.3	86.2	-41.3	-17.8	-0.1	-18.3	35.1	-14.6	129.6	22	75.3	49.5	-104.3	3.1	-60.3	-60.2	-74.4	-108.7	36.3	11.8	-28.7	142.9	-45.6	-68.9	-21.4	-101.5	115.2	80.5	39.7	31	-49.2	3.3
1191	11.2	50.6	17.7	30.2	18.9	-4.1	-9.7	4.5	365.6	14.8	-3.6	1.8	31.2	-0.7	33.5	-5.2	-4.3	19.7	-3.9	20.3	3.6	33.4	19	-6.9	-28.3	22.4	1.7	-6.6	21.9	12.3	25.6	20.4	27.9	7.9	-43.9	52.1	70.7	7.7	12.5	-0.7	23.5	1.2	22.1	14.2	-19.9	11.3	21.2	6.9	-8.4
1192	82.8	26.1	31.7	103.6	41.1	1.8	37.7	53.2	68.1	27.5	40.3	39.3	20.1	65.1	30.6	15.7	26.8	10.7	17.3	15.1	64.6	14.6	71.5	20.7	81.3	46.8	55.8	31.9	48.5	18.1	18.9	31.3	25.3	31.2	-0.4	21.6	72.1	34.7	49.9	40.9	24.4	111.7	64.9	22	-78.9	4.6	-9.7	95.9	27.7
1193	91.8	111.3	114.5	111.7	87.3	47	212.6	27	74.5	27.6	-52.6	49.8	115.7	82.8	88.1	-12.8	-43.3	30.2	-22.4	-6.9	109.5	57.8	160.3	97.2	17.7	38.4	105.4	38.7	194.1	192.8	41.8	165.4	63.1	246.6	54.4	-21.2	130.9	51.4	100.3	86.4	22.5	145.7	29.9	-18.5	42.4	-66.4	-39.6	46.7	8.3
1194	17.2	43.3	55.6	136	111.7	53.4	22.4	74.2	61	99	13.8	41.2	19.7	51.8	29.4	44.3	8.4	58.2	51.1	79.4	7.3	24.9	37.1	18.7	-23.4	107.7	58.9	61.9	87.2	79.3	13.5	30.6	59.8	30.9	9.7	113	89	86.8	73.4	52	29.6	-24.5	69.4	36.1	47.5	84.1	32.4	35.9	88.8
1195	352.9	47.5	61.2	243.2	182.6	106.2	159.9	245.6	16	491.8	376.1	314	98.1	122	58.2	372.5	183.2	108.5	135.8	84.6	155.1	87.7	229.9	92.3	-183.5	75.6	72.6	147.7	102.2	227.8	119.9	120.3	34.2	182.5	129.6	131.3	92.1	194.6	25.6	151.5	93.5	141	241	99.4	-33.5	84.7	56.6	226.7	164.9
1196	0.7	11.9	5	-6.9	-20.4	-9.2	0.1	-8	-21.8	-11	-9.1	-26.1	2	23.5	-5.3	-19	-14.7	9.5	-1.7	6.6	4.3	-11.8	10	-9	-7.1	-10.7	12	-15.7	13	-9.5	41.9	23.2	15.2	6.2	-2.8	-12.4	-48.3	7.8	75	-22	10	45	3.2	-3.9	4.2	15.3	-15	-7.8	-2.2
1197	142.2	495.1	311	262.3	229.2	206.6	67	186	188.4	188	210.6	81.9	312.3	222.5	260.8	115.2	327.7	287.4	297.5	347.6	205.7	226.6	246.6	263.1	221	250.2	115.7	183.1	178.7	192	175.5	224.5	265.9	272.6	256.5	454	270.7	374	443.5	250.6	437.3	156.5	181.4	265.4	439.1	84.5	334.8	81.4	235.3
1198	275.5	205.9	83.1	103.8	120.5	101.7	135.3	93.8	96.8	105.8	169.2	121.6	116.5	63	111.9	81.6	87.2	99.7	72.2	64.2	143.1	63.8	162.5	118	197.7	110.8	81.1	123.9	229.7	232.9	80.8	142	209.5	180.3	133.6	78	139	124.1	192.9	144.9	65.5	141.1	158.5	119.6	131.4	126.6	73.2	106.3	115.7
1199	-91.9	191.9	36.8	163.9	-10.8	30.8	-52.4	89.4	-80.4	-6.8	-178.7	-96	20.4	78.2	414.7	52.9	-164.4	203.4	224.2	167.9	97.3	193.6	228.8	365.6	-151.5	490.9	50.1	54.3	218.7	-229.1	90.6	-29.9	57.6	-146.1	-156.2	-108.5	-176.2	-292.2	61.4	-123.5	-19.8	218.7	-174.3	213.2	-178.8	148.9	-13.7	20.8	151.6
1200	-58.6	226.3	-19.1	-16.9	-32.4	-56.5	95.7	22.8	5.7	-1.1	49.6	-13	-14.5	28.1	52.9	115.6	-93.5	115	21.6	188	-114.5	-42.7	28	-51.7	-18.5	7.7	-40.8	-51.1	-45.5	-153.4	101.1	-94.7	-58.8	-102.3	-5.5	5.7	101.5	-72.5	92	73	-24	-165.9	-110.8	10.4	116.7	-80.1	-162	-170.8	45.5
1201	19.3	44.3	49.9	27.1	20.2	49	26.9	45.4	62.7	2.5	21.2	12	36.1	11.9	23.5	29	37.5	41.6	67.4	62.1	9.4	16.5	19.5	28.7	-9.8	24.9	22.9	7.1	-2.6	84.9	29.1	24.7	15.8	19.5	11.6	43.1	60.5	50.9	16.4	37.5	35.2	21.5	44.9	49.7	55.5	63.8	77.6	15.4	23
1202	87.6	73.5	40.7	39.6	43.6	45	47.7	42.3	27.9	29.2	76.3	78.2	55.6	53.4	68.5	17.9	86	49	40.3	26.5	24.7	3.3	49.1	25.8	127.6	63.2	56.6	61.6	-3.4	98.3	51.1	39.7	70.9	133.9	76.6	62.9	59.4	48.3	84.1	34	45.6	23.6	85.5	33.7	92.7	33.4	23	84	30.5
1203	-45.5	28.1	22.3	-36.3	-81.7	24.6	-43.1	-20.4	-81.7	8.1	80.7	33.8	36.1	103.8	57.6	63.2	150.6	-14.1	10.2	53.4	58.3	28.4	-64.4	140.3	-55.1	-37.2	68.5	59.8	2.1	39.2	19.3	-76.5	-40.8	-162.5	-120.1	36.8	-32.3	64.3	41.5	46.8	30.2	-53.5	-66.6	110.9	126.5	-5.3	-14.9	140.3	-19.9
1204	-242.1	-47.3	-84.3	-63.5	-95	-66.5	-183.8	-12.2	-215.9	-85.9	-64.1	-155.4	-77.1	-110.5	-66	21.6	-106.7	-40.5	-31.3	-60.1	-113.5	-72.2	-7.1	-52	-78.7	-40.4	-136.4	-138.6	-134.5	-375	-86.6	-53.1	-142.2	-178.2	-345.6	-102.4	-156	-49.3	-82.9	-76.6	-115.1	-65.7	-185	-104.7	-75.8	-90.4	-44.2	-85.7	-41.6
1205	209.7	57.5	142.8	105.5	217.1	55.6	144.3	48.5	63.5	45.6	30.9	65.7	140.5	147	128.7	42	58.2	31.5	17.8	41.4	186	95	47.7	113.8	57.1	116.6	109	120.4	241.8	319.4	159	190	195.5	224.2	221.1	188.1	81	97	46.9	36.6	213.1	221.5	234.9	42.2	11.6	75	64.5	87.6	51.1
1206	-146.6	-93	-19.4	32.3	-81.5	47.9	-26.9	-7.2	-180.4	-52	-32.5	-60.2	-80.3	-83.6	30.5	6.8	-83.1	-42.1	-51.6	30.7	-41.3	-73	-50.5	-42	-252.9	-125.3	-76.7	-78.4	-185.7	-190.6	-80.8	-59.7	-86.6	-186.1	-178	-48	-33.2	-61.3	-168.4	-59.6	-60.3	-155.9	-64.9	-68.1	-77.1	-79.4	-4.8	-117.6	-44.9
1207	170	28.3	128.9	54	160.3	126.1	20.3	103.8	144.4	127.5	160.4	14.5	192.6	118.1	113.4	125	98	64.3	57.5	26.7	209.3	229.9	162.1	205.9	180.2	149.1	74	156.1	242.6	217.4	150.8	203.1	201.7	231	248.5	144.3	177.2	120.2	150.1	139.2	229.9	21.9	205	168	87.6	162	167.6	123.9	75.6
1208	-205.3	-31.8	-72.3	36.4	29.3	-7.2	-61.2	19.7	-0.3	-34.8	-22.6	-33.3	33.8	-2.9	-49.3	18.4	46.6	3	9	9.4	-24.1	-26	-49	-23.5	-124.8	4.7	-170.6	38.2	27.7	-298.7	-98	2	29	16	87.1	18	13	-83.5	-106.3	12.2	-65.3	11.7	-2.6	-36.8	-46.7	10.4	-38.5	-22.5	-95.3
1209	53.7	24.7	47.6	32.6	21.5	43.8	15.4	22.9	55.8	28.5	69.1	-10.1	8.5	32	40.4	57.8	62.8	48.4	27.4	28.2	-1.5	49.7	32.3	26.7	87.4	35.1	17.3	39.9	118.9	92.1	28.4	36.7	39.8	20	19.2	37.8	-61.1	42.4	-21.3	99	-4.3	71.5	-0.8	48.1	0.9	46	61	38.5	33
1210	-141.5	-73	-97.3	-19.1	-115.9	-58.1	-15.9	-95.5	-133.4	0.9	-35.8	-9	-17.9	-20.2	-59.8	-45.5	-42.4	-24.8	-64.4	-29.3	-126.6	-87.5	4.4	-59.2	-24.5	-25.6	-28.5	-111.7	-67.1	-261.2	-133.5	21.7	-28.7	-172.6	-134.1	-93.2	-192	-180.7	-184.5	-157.4	-64.6	-92.9	-37.8	-37.1	-107.5	-102.1	-111.5	-36.4	-52.9
1211	223.9	59.2	77.5	79.4	44	51.4	77.8	16.5	170.7	343.3	162.7	201.2	36.2	97.4	33.7	41.5	252.5	121.1	108.8	66.1	102.2	67.9	125.2	41.5	79.1	74.3	84.7	35.5	136.3	9.6	26.4	103.4	82.2	55.6	260.7	29	84.9	68	47.8	69.4	-15.5	78.8	31	26.3	109.2	44.5	9	214.1	122.2
1212	-9.5	-48.5	-7.3	-8.3	-60.9	-2.1	-33	-5.4	-40.3	2.6	33.4	-7.7	-6.4	-25.5	-39.2	-29.6	-28.5	-27.6	0.6	-20.6	-5.9	3.2	0	-3	-58.5	-63.2	-2.6	-5.7	-131.7	-53.3	-32.2	-48.6	-7.2	-6.8	-73.1	-27	-75.5	-46	-37.7	-57.7	-46.5	-26.9	-30.5	-12.7	-18.6	-55.9	-38.5	-9.8	-20.8
1213	7	-35.1	-2.6	0.3	22.3	12.9	11.5	-11.2	76.6	21.3	4.1	15.6	-8.2	1.1	-8.3	-19.4	1.7	19.1	-6.9	3	29	-8	40.2	-34.4	104.1	53.9	22	35.6	-38.5	-22.9	-12.3	-1.1	-14.8	21.7	-72.2	6.7	-39.5	22.4	30	-38.9	27.9	1	-15.8	31.3	27	-15.9	-22	-16	10.3
1214	6.8	-39.8	-8	-8.8	-24.7	1.8	-25.8	-0.5	-51.3	-14.7	-17.2	-6.8	-6.7	-1.9	-5.9	-7	-13.6	-11.2	-8.6	-0.7	-10.3	2.2	-2	-8.5	49.8	9.3	9.1	-7.4	-31.5	-9.8	-8.6	2.1	-5.5	20.4	14.9	-9.3	7.3	-14.6	-31.2	-29.8	-2.5	-14.5	12.4	-10.6	2.7	-2	-23.2	-2.7	-14.9
1215	-143.9	-3.2	-88.3	-37.7	-90.5	-134.9	-88.5	-60	-117.6	-86.6	-125.4	-143.6	-2	-105.8	-131.3	-31.7	-171.2	-39.4	-44.5	-27.3	-92.4	-94.9	-18.6	-36.8	-218.8	-104.2	-107.7	-120.5	-176.4	-295.5	-177	-154.6	-165.8	-195.9	-270.8	-90.9	-57.8	-68.5	-74.4	-149.6	-92.7	-38.5	-158.5	-56	-103.1	-15	-45.7	-68.9	-17.5
1216	566.6	209.4	299.6	281	141.5	305.1	260.4	487.6	52.5	146.8	161.6	142.3	172.1	190.5	196.3	114.7	60.5	219.8	232.9	273.4	240.2	225.3	464.3	200.2	34.8	128.9	133	193.5	254.7	238.3	128.6	565.1	85.1	266	274.2	338.6	262.6	156.4	128.1	150.2	124	175.2	546.4	161.6	175.8	215.9	337.9	144.8	374.6
1217	249.3	1303.1	851.4	451.3	469	1015	501.6	685.7	539.3	560.9	920.1	739.4	929.2	628.4	548.6	790.7	320.8	1325.3	716.9	899.2	428	573.7	564.5	620.5	934.8	441.1	412.9	744.4	402.2	637.5	726.7	734.5	198.8	579.4	504.2	923.2	582.9	848.9	887.6	685.3	591.9	1125.6	353.9	725.4	545.8	886.9	778.7	330.8	693.6
1218	-48.6	-42.7	-43.2	6.8	-34.6	-33.4	-21.1	-21.9	-107.8	-20	-33.1	-34	-16.9	-45.1	7.8	-27.4	-36.4	-32.6	-25.8	-25.3	10.1	-0.9	-46	23.8	-26.5	-29.1	36.3	-35.7	32.5	-109.3	-11	-9.1	-73.1	-53.1	-110.7	-28.8	-47.8	-82.4	-59.1	-3.9	-5.2	-93.1	-57.9	-6.8	-19.1	-4.2	-37.8	-47.4	-24.4
1219	-78.1	-204.9	-118.8	-110.8	-260	-152.3	-107.1	-190.1	-278.8	-189.3	-249.6	-158	-143.1	-55.9	18.8	-69.3	-97.7	-154.3	-109.1	-54.5	-91.7	5.7	-88.2	-136.3	-328.1	-288.8	-140.8	-272.1	-284.6	-588.5	-182.1	-206.5	-146.4	-252.7	-378.2	-192.9	-418.8	-313.8	-344.2	-278.7	-154.4	-386.5	-163.7	-169	-118.8	-173.2	-117.5	-346.4	-121.2
1220	53.7	-22.6	26.8	-33	-78.5	-109.5	-8.9	-63.1	-2.5	41.9	67.8	77.1	5.2	-34.6	14	28.4	33.7	39.5	44.1	9.4	4.3	22.3	-51.1	18.6	41.8	-38.8	-8.5	-18.3	-52.1	66.9	32.3	-34.6	18.6	-12.4	-176.6	51.9	73.8	3.2	-29.5	11.3	53.4	-16.7	16.3	28.8	-4.6	-41	22.7	17.7	22.2
1221	187.4	428.7	491	441.2	3.6	519.5	101.6	97.5	216.6	220	324.1	148.1	145.6	583.5	41.8	363.9	610.5	413.6	383	167.2	191.6	100.6	132.9	287.4	248.7	985.5	352.2	240.4	297.6	293.2	55.1	441.5	384.1	-18.4	-63.9	50.5	203.9	520.5	358.4	142.4	137.7	944.3	142.7	98.6	27.1	938.1	282.4	260.2	118.3
1222	6643.5	10826	5720.6	4828.2	9962.1	8538.1	6753.2	4337.7	6565.4	7472.7	5502.8	7282	6106.8	6154.8	8959.8	8481.9	5968.6	3012.8	3426.7	3487.8	5797.2	6923.9	6036.6	5634.9	27863	14267	5779.8	8857.4	6981.4	12054	12023	9050.9	7450.4	8251.6	20005	6123.7	10047	3328	11646	10266	4859.1	5568.3	6504.3	5394.5	17995	6293.8	7928.8	5657.9	4042.2
1223	2544.5	1914	2071.8	1852.6	2881	1291.3	3819.4	1649.3	4073.2	3811.3	2486.4	4673.2	2633.4	1847.3	4698.3	5539.3	5994.8	991.7	1761.9	2526	2910.5	2051.5	1950.9	2575.8	7189.6	1533.1	2222.1	2138.1	1309.4	2721.4	4503.4	2481.6	2130.6	2146.6	5913.7	1046.6	1425.9	2048.1	1684.3	1657.3	2621.4	894.2	2967.1	2258.9	5950.6	820.5	1597.7	3369.9	2089.8
1224	28.2	17.2	11.4	6.9	-8.9	-1.7	22.5	-2.3	-18.4	-5.6	-4.4	-11.8	48.2	4.1	7.8	-2	10.2	-1.8	6.8	2.9	50.1	75.1	11.2	50.1	-12.7	-8.7	8.1	39.9	-11.8	-19.7	27.3	15.6	-7.7	12.6	14.3	1.9	-56	-8.3	56.3	11.1	33.4	-48.8	3.7	23.1	-33.1	10.6	0.2	10.2	5
1225	-160.1	63.2	143.5	-27.6	-48.1	-55.9	10.7	90.9	-127.4	35.1	-92.6	-90.6	11.6	75.4	-27.7	38.1	-76.5	84.3	119.4	139.6	-0.7	27.2	-102.4	18	-180.6	25.4	-96.8	-55.9	-96.1	-318	-54.6	156.1	-146.2	-178.8	-460.4	123.2	-7.1	-27.6	37.7	-82.9	16.4	-99.9	-95.4	142.6	46.3	81.3	-34.7	-80.9	26
1226	-260.6	-55.9	-153.6	-154.8	-124.8	-173.5	-456.1	-94.9	-157	-177.1	-220.4	-254.9	-71.7	-163	-199.5	-75.3	-287.7	-162.4	-154.4	-93.8	-124.7	-85.6	-93	-53.7	-246.2	-242.2	-126.9	-83	-321	-373	-204.4	-276.1	-226.4	-317.1	-533.1	-138.8	-202.3	-157.7	-112.5	-130.3	-85.4	-178.9	-221.7	-118.5	-136.2	-164.8	-60.6	-225	-122.2
1227	461.3	389.6	384.3	319.2	385.1	363.5	270.9	175.1	210.2	415	305.6	347.5	256	231.8	236.5	295.3	284.5	407.9	523.8	273.2	261	314.8	170	255.9	274.2	142.5	358	281.4	563.1	353.4	324.6	420.1	435.1	133.8	258	128.8	479.4	151.6	140.3	414.6	253.8	307.4	427.1	203.9	134.7	390.4	313.5	388.2	483
1228	-63.7	32	71.3	42.9	-12.1	41	43.4	33.7	21.6	60.8	66.7	53	38.8	42.3	-3.2	5.6	52.5	77.8	56.4	57.5	-29.6	56.3	46.1	63.2	-14.1	-75.3	67.6	101.8	47.3	-23	-25.1	-7.9	40.5	42.5	-228.8	-47.5	60.4	45	-37.3	31.8	-58.2	73.7	-23.7	22.3	61	-13.7	42.8	40.3	85.2
1229	213.4	69.1	39.2	192.2	91.5	125.1	217.6	168.3	63.7	169.8	144.8	169	115.9	96.1	112	225.6	30.9	175.6	396.4	210.1	67.6	78.7	63.5	54.9	87.2	55.8	105.4	109.2	210.3	49.8	142.3	184.1	146.8	111.3	117.5	150.3	226.5	145	77.8	424.5	62.5	35	260.4	101.2	50.4	142.8	314.6	174.9	179.9
1230	151.1	122.2	134.5	63.9	66.1	55.8	164.9	123.4	129.8	93.9	171.1	124.5	115.8	98.7	80.9	131.8	193.6	118	176	134.5	105.9	69.1	141	99.5	143.2	27.3	53.5	63.7	66.1	142.4	73.5	141.5	104.8	126.3	181.1	174	162.8	55.3	97.9	86.8	116.8	-4.6	147	88	94.7	150.6	175.1	78.8	74.8
1231	32.6	37.4	31.6	31.8	62.5	7.8	46.6	21.1	13.2	2	-5.2	16	54.2	25	86.1	22.9	38.7	-2.9	17.6	9.6	32.2	47.6	50.2	66.7	59.8	47.8	35.2	50.4	6.7	148.2	88.1	65.6	35.1	117.2	-47.4	96.1	48.7	42.5	30.7	7.1	79.7	-62.5	81.6	60.2	-1.7	3.9	9.3	-10.4	17.6
1232	-286.3	-109.6	-104.7	-127.9	-136.1	-165.7	-232	-78.8	-38.6	-126.9	-193.2	-148	-93.5	-197.7	-136	-33.6	-221.8	-76.5	-73.6	-53	-149.7	-133	-116.4	-112.6	-299.8	-185	-159.2	-113.7	-259.8	-450.3	-186.5	-123.6	-168	-173	-341.3	-95.3	-217.9	-182.8	-239.4	-134.8	-136.9	-279.5	-224.7	-81.7	-90.6	-182.7	-92.2	-269.2	-128.7
1233	22.5	34.4	24.5	19.3	43.1	42.3	22.3	36.3	45.6	26.6	2.9	10.6	27.8	52.9	39.1	53.4	12.1	24	27	34.5	20.8	17.5	26.1	11.6	84.8	41.5	9.5	41.3	68.6	91	7.1	23.1	37.1	44.2	58.3	70.5	23.2	48.1	38.8	59.4	56.1	66	45.5	19.9	98.6	41	62.5	20	12.8
1234	1551.2	590.1	501.7	681.9	478.5	878.2	1055.5	1405.4	609.3	1290.9	607.2	470	619.3	907.8	570.9	829.5	560.9	861.4	754.1	1644.9	820.4	1212.7	971.9	509.9	523.8	408.7	627	876.3	1030.4	1213.2	509.6	1277.1	1224.4	704.7	767.4	1224	1604.3	759	736.3	873.9	443.4	2099.3	1168	196.9	494.7	642.6	650.7	1116.7	945.1
1235	16.5	10.1	47.6	9.5	8.4	6.5	19.9	7.2	16.6	14	12.2	18.5	-0.9	7.5	28.3	-9.9	1.2	-1	4.8	-2.5	27.3	26.7	14.9	3.9	116.4	45.3	8.1	2.3	24.9	61.4	66.5	26.8	-8.2	30.1	97.1	0.4	10.6	4.5	21.2	0.1	-8.5	22	2.9	4.9	-4.4	-4.4	-6	-15.7	3.6
1236	-71.3	-44.3	-3.6	33.3	-103.7	14.9	-137.4	0	-132.6	-82.6	-44.6	-47.6	-5.8	-46.7	-41.7	31.2	34.7	-2.8	37.8	-27.1	9.7	24.4	-16	1.3	-149.7	25.1	-26.6	-5.3	-142.7	-151.3	20.2	-88.9	-5.5	-117.3	-66.7	-13.6	26.6	53	89.1	-45.2	-55.6	-16.9	-98.6	105	-20.6	43.3	-12.4	-80.5	28.1
1237	56.5	68.3	14.4	11.5	9.5	50.9	4.2	58.3	2.6	-4.7	-16.6	-3.5	47.2	31	12	32.5	27.7	40.8	34.8	12.2	89.8	12.3	78.8	20	35.8	-30.2	35.6	65.1	48.7	29.1	5	26.1	5.2	-3.9	-1.3	48.3	168.4	-18	20.8	12.5	18.7	46.6	4.9	-3	-34.1	134.1	-9.8	-17.1	9.9
1238	-4.5	-35.3	-43.4	-19.9	-53.3	-50.8	-0.7	-33	59.5	25.5	25.4	5.2	26.1	8	-30.1	-1	63.9	-9.9	20.5	-31.8	-82.8	1.1	-47.3	-41.1	-97.1	-22.1	31	-12.7	-16.6	-5.1	40	-37.3	6.1	-17.9	-12	-16.1	-87.2	-87.8	-112.8	-87.6	-64.6	-86.9	6.6	48.4	-26.6	-12.9	0.5	70.7	-40.6
1239	554.6	1085.7	893.6	729.6	796.1	928.9	496.5	676.5	340.7	828.1	453.8	879.6	1020.8	865.1	569.4	1224.1	1324.9	1080	836.3	606.3	589.9	749.9	865.4	743.2	645.4	733.6	569.2	781.5	696	1260.5	908.8	1056.3	690.8	941.9	448.5	949	1044.9	715.7	477.3	563.1	1169.6	1123.9	791.6	754.5	644.9	803.8	1032.5	776.8	1314
1240	25.3	-50.1	-267.6	-3.1	-96.4	122	-129.7	54.8	158.4	104.8	80	89.7	76.8	132.6	61.7	32.8	58.3	38.1	101.6	13.4	-1.2	70.7	98.2	0.2	-342.7	-147.5	-33.6	-11.6	103.9	-200.8	-37.4	-189.9	-42	-101.6	-66.4	-50.9	-204.3	-133.4	-155.2	129.6	-172.9	-20.3	-14.6	-19	129.7	-95.1	67.7	41	-22.1
1241	91.5	125.7	176.3	142	85.7	116.1	83	125.8	243.3	87.2	140.4	101.3	101.8	98.1	156.8	131.9	181.5	95.8	118.3	171.1	123.6	57.4	108.9	97	186.2	145.9	67.8	80.4	31.8	194	125.2	143.3	90.8	117.6	273.5	123.6	149.2	143.5	208	115.8	185.4	93.6	84	106.6	125.8	87.2	222.8	81.6	105.7
1242	3700	1768.5	1466.1	1472.6	3326.4	1650.5	2012.4	3139	406.1	1174.3	3726.2	1549.7	1407	1674.4	1763.5	5979.8	715.7	760.3	3430	3116.8	1121.9	1005.8	431.1	1901.6	761.2	659.3	2986.8	1391.6	7344.2	3435.6	1440.1	1307.9	1246.1	859.2	1703.2	1213.1	2357.8	872.7	394.9	1479.7	472.9	2292.9	2331.7	1455.8	269.9	2062.5	1523.2	1215.8	997.6
1243	7.4	-14.2	-19.4	0.7	-38.6	-38.4	8.6	3	0.5	7	21.3	-10.9	4.1	1	18.3	1	-12.7	0	2.4	-2.8	-5.8	1.1	-19.1	-8.8	-13	-3	15.2	17.2	30.5	-7.4	5.5	-1.6	-4.5	5.8	7.3	18	-41.1	-9	-64.4	-11.3	-21.4	-45.7	-15.6	-20	-23.1	1.2	8.9	-3.4	2.9
1244	3.1	7.2	8.6	-3.9	9.1	3.2	-4.7	5.6	26.3	9.6	-2.3	-1.7	13.8	6.1	-5.1	-7.1	5.7	-4	3.7	2.9	16.3	11.6	0.8	3.8	-13.1	13.4	9.7	0.4	22.7	-22.4	25.4	9.2	-3	-13.5	12.1	8.6	16.8	-0.4	13.9	-3.6	4	-6	25.2	5.2	6.3	8.1	8.8	-3.3	-1.7
1245	247.5	501.7	118.8	79	211.4	146.6	202.1	175.9	20.9	117.5	772.9	125.5	178.2	204.6	112.8	429.5	33.9	349	249.1	146	145	188.2	112.8	255.2	73.6	104.9	297.8	132	159.9	168.5	34.8	200.2	89.7	80.4	-6.2	138.9	215.8	32.4	85.3	115.9	247.2	191.1	183.3	472.7	59.5	287.5	171	120.5	63.1
1246	112.7	443.4	802.1	459.5	222.3	163.2	95.3	680.2	152.5	278.6	424.3	390	567	233.1	872.9	454	434.4	586.5	492.6	603.3	317.9	391.2	452.6	391.6	432.1	599.7	119.6	231.6	183.9	289.1	252.8	529.4	251.7	235.1	135.5	567.2	562.9	97.2	419.8	374.3	947.9	644.8	453.7	436.4	540.1	207.8	818	440.7	651.9
1247	-37	-9.3	-1.9	-28.8	-39.8	-30.7	-34.3	-16.8	-74	-9.2	-12	-4.1	31.4	7.6	-24.4	-9.6	2.8	1.2	-5.2	-12.3	66.8	43.5	-20.6	16.6	-63.2	-6.7	-9.3	19.8	-56.2	-13.9	48.6	-7.9	-28.2	-3	-52.7	-13.6	-0.5	-24.9	-16.8	0.3	8.3	-70.2	-21.3	0.7	5.6	-11	-16.8	-2.7	-17.5
1248	181.9	153.2	167.4	164.8	276.4	228.2	200.3	160.2	134.5	122.4	156.8	197.4	167	192.3	142.6	57.4	236.3	172.4	156.2	131.4	161.4	115.7	176.8	140.8	175.7	367	153.8	188.9	192	264.1	211.6	196.9	251.6	226.5	339.3	211.5	294.1	246.4	149.8	231.8	201.8	209.8	366	157.6	241.3	146.6	192.9	195.5	167.6
1249	221.5	842.8	565.8	581.1	532.7	534.5	463.7	729.2	238.6	297.4	1500.4	354.6	800.1	403.8	529.7	253.9	265.6	619.1	646.1	534.4	724.3	1357.3	397.4	1033.4	169.7	683.9	257.5	460.3	260.5	363.7	626.6	474.2	332.9	388.5	245.4	529.2	336.7	332	1074.7	305.9	738.5	595.9	724.7	821.8	425.9	744.9	463.6	454.9	1112.5
1250	-23	-28.9	-33.6	12.4	-61.7	-7.4	-53.4	4.6	-27.1	-22.9	-42.5	1.8	-29.6	-20.1	1.1	6.2	-21.6	66.9	-2.7	-0.9	4	-9.6	-7.7	24.1	-8.5	-38.7	-2.7	5.3	-133	-74.1	-53.3	160.5	-44.3	-38.8	-124.2	-46.5	-21.8	-13.8	-23.1	-70.7	-41.6	5.6	-39.1	-12.9	1.1	-24.4	-14.5	-54.8	11.4
1251	8.7	11	5	5.7	24	17.3	-6.6	5.2	36.5	-4.9	2.2	-7.5	10.8	-1	-4.6	-5.8	2.5	-6.1	-4	-2.6	17.3	-4.8	-4.1	-7.3	-23	-39.7	-6.6	21.7	-23	80.3	36.2	5.7	17.1	23.5	27.9	2	-5.3	16.3	19.7	21.6	1.8	12.9	4.3	5.1	-4.4	-11.8	7.8	0.2	-10.6
1252	1.5	-38.2	17	-6.2	62.5	76.7	-13.7	50	40.8	18.5	25.9	4.5	65.9	60.7	78.4	52.3	71.5	-6.6	-7.7	36.2	4.1	104.6	60.2	92.4	5.3	-128.9	-39.5	41.2	-73.5	30.8	34	65	-98.9	-16.3	-47.1	141.5	-30.7	41.9	16.6	106.7	185.1	-12.1	-13.6	48.6	-6.8	-13.8	-54.9	22.7	49.9
1253	154	542.7	772.8	343.4	158.3	352.3	293.7	417.3	462	447	702.2	340.5	277.8	353.5	453	669.5	431.9	991.4	435.5	442.2	377.7	206	286.8	224.3	439.4	209.8	168.6	326.1	209.9	399.5	413.4	395.7	407.6	387.8	549.9	457.6	214.5	568.2	306.5	360	576.7	163.7	265.4	337.5	426.3	462.2	601.8	384	657.5
1254	11.1	18	23.6	13.5	54.8	10	14.6	12.3	33	13.9	11.3	15.6	23.2	43.7	18.8	4.7	5.2	14.5	12.5	3.1	4.2	10.2	20	17.7	-10	16.6	23.6	-4.9	14.4	18.3	24.7	41.1	13.9	30.3	62.5	30.3	60.5	42.6	61.4	41.7	48.6	3.3	52.8	27.8	4.3	21.7	19.9	28	15.2
1255	5.2	-18.9	-11.3	-3.2	-16.5	-3.4	2.7	1.7	-1.5	-2.4	-7.4	-2.1	-0.9	2.9	11.4	-3.7	6.3	-13.4	-7.9	-2.1	11.3	-3.6	-4.9	-3	-2.4	-18.6	-3.7	-13.5	-57.1	22	-12.7	-7.5	-7.7	-1.2	-1.4	7.9	-20.3	2.4	17.6	-21.5	6.9	-51.3	6.7	8.9	-13	5.2	-5.8	1.7	-0.7
1256	34.5	15.7	111.8	143.6	103.1	74.9	55	117.6	67.9	35.8	31.2	48	127.2	80.7	80.6	91.3	35.6	176.5	93	118.9	40.5	57.7	54	40.8	50.5	91.4	63	114.6	138.6	94.3	38.8	69	113.1	114.4	135.7	109.6	16.9	81.1	89.2	70	172.6	46.9	78.6	49.3	54.7	92.5	185.9	54.4	108.9
1257	495.3	438.7	701.3	335	366.1	331.1	429.6	321.8	499.6	356.5	409.8	275.7	440.7	508.3	374.9	397	409	281.3	294.1	361.1	274.5	281.7	227.5	329.8	533.1	823.9	232.6	253.3	312.9	489.2	313.8	428.6	319.2	528.8	471.8	333.9	447.9	186.4	262.3	276.6	400	570.3	278.5	304.8	421.1	432.8	355.9	314.2	166
1258	401.2	551.3	647.8	1103.5	267.5	262.4	504.9	251.3	413.4	140.2	90.2	332.5	421.1	661.5	364.7	12.7	260.5	513.6	140.7	130.5	373.3	310.1	303.8	303.9	321.9	394.1	344.3	363.4	299.1	449.5	433.2	425	370.4	773.2	384.5	257.4	337	280.3	397.5	274.4	160.2	494.8	383.2	356.9	352.3	353.1	103.4	318.7	256.4
1259	1829.4	3111.9	2461.1	3608.3	2045.5	2275.1	1469.5	1457.4	2543.4	856.5	1951.3	1889.4	1660.5	2737	756.7	702	2693.4	1913.4	1046.2	1803.7	1212.6	1342.7	2103	1531.1	1001.6	1307	1255.6	1243.2	1058.9	1241.1	1402	1197.2	1542	2515	2354.9	2195.4	2864.1	3836.6	1094.8	716.3	2106.2	3075.2	1911.5	1720.7	858.5	3245.5	1830.9	1217	2220.2
1260	221.2	232.2	223.2	364.9	396.8	478.3	564.1	360.9	180.2	214.3	250.2	412.7	166.7	409.1	193	285.5	48.5	252.2	210.3	178.1	195.4	174.8	199.7	544.9	135.4	321.4	453.7	379.1	537.3	628.7	598.6	374.3	426.5	257.6	504	470.7	228.5	688.5	247	330.4	257	463	590.7	424.4	189.4	547.9	246.2	292.8	349.1
1261	-22.6	-29.9	-12.1	-19.4	-15.8	-21.9	-28.6	-22.1	-50.9	1.2	-15.1	-5.8	-2.3	-27.9	-3.8	-11.5	-1.6	-23.8	-0.5	0.1	-30.6	-14.3	-31.5	-15.6	-31.9	-11.2	-24.7	-36.3	-46.4	39.4	14.7	-23.2	-45.7	-39.2	-112	-8.1	-108.5	-39.7	-44.4	-38.2	-13.4	-60.4	-1.9	-20.7	-18.6	9.5	-28.4	-34.2	-13.5
1262	-12.2	-24	-9.6	-6.1	-12.4	-60.2	-56.3	-33.7	-47.3	-50.8	-68.2	-73.3	-10	-28.3	-55	-35.8	-74.1	-36.8	-27.7	-23.7	-33.6	-41.8	-24.9	-18	-22.1	-1.8	7.5	-43.1	-35.2	-92.3	-13.9	-7	-30.6	-58.3	-140.8	-16	-67.4	-42.9	9.5	-17.7	-35.5	18.7	-31.3	-16.4	-37.1	-26.2	20.3	-60.3	-14.8
1263	-50.3	-126.2	10.3	-7.2	-111.5	-33.1	-128.2	-1.2	-5.3	-80.1	-103.2	-67.5	-31.8	1.8	-18.2	-63.7	-182.8	-12.6	12.8	13.3	-40.4	-31.2	2	-47.3	104	-41.2	3.1	-27.2	-9.9	-73.7	-31	-95.1	-50.1	-136.6	-146.8	-118.7	-9	-17.6	-70.7	-11.5	-201.4	14.8	-64.7	-19.7	31.4	-42.7	-174.9	-137	-12.1
1264	-106.1	-13.9	5.2	-46.8	-35.5	-39.4	-24.2	-23	-4.8	-18.1	-31.4	-32.5	-18.5	-7.9	-36.5	-32.9	-92.8	-18.5	-15.7	-19.6	-48.6	-37	-18.6	-31.3	-42.2	-77.9	-24.7	-63.8	-28.1	-26.1	-8.2	-40.7	-10.9	-24.4	-22.1	-50.3	25.3	-2.2	-55.8	-16.1	-124.7	26.5	-35.4	-17.3	21.6	-46.5	-89.8	-77.3	-34.9
1265	31.6	-1.4	34.7	22.6	28.4	7.9	2.2	14.1	39.9	21.8	20.8	19.6	13.2	24	18.4	10.8	25.1	16.1	-3	3.2	11.2	24.7	5.7	21.4	-17.5	66.9	25	-6.6	28.6	82.2	3.5	28.2	42.2	23.4	58	26.8	34.8	3.2	-9.7	20.8	13.8	42.7	32.3	10	-25.8	54.3	9.2	38.1	9
1266	1679.4	2604.7	1977.3	1746.3	1961.8	3952.5	1517.1	969.7	1363.9	1543.2	2798.1	2376.9	1600.8	2016.8	1062.3	1400.8	3715.6	2333.4	1712.3	1348.8	1292.6	1487.6	1067.9	1568.5	2641.8	1600.5	1404.7	2341.9	896.4	1958	1141	1779.8	705.9	2656.5	1610.9	1799.2	1180.9	1621.4	1026.6	980.9	1498.3	3862.5	1099.2	1158.8	1079.8	2717.5	1235	1252.1	1132.6
1267	134.8	101	24.2	37.2	1.7	63.3	108.3	35.7	27.1	78	58.3	75	17.9	84.7	24.1	55.2	47.1	85.7	42.4	43.9	89.7	41.6	63.2	55.5	90.4	139.8	55.9	25.7	49.3	99.4	54.6	98.9	61.3	52.7	144.7	109.8	-74.2	19.3	216.5	85	88.6	188.9	63.5	76.8	36	101.5	49	39.4	77.3
1268	-10.1	25.5	2.1	7	-62.5	21.1	-124.3	41	330	82.6	-61.9	-49.4	54.1	30.8	65.6	25.4	121.9	18.6	67.1	4.7	76.1	66	30.9	68.8	78	70.2	33.6	67.6	-98.3	33.5	9.9	66.9	-19.8	17.8	137.7	198.3	134	61.8	169.9	-44.8	76.3	-101.1	83.4	28.9	211	-11.8	40.2	-62.1	-13.6
1269	47.9	27.8	4.4	29.3	14.8	25.8	53	12.8	6.5	23.1	33.2	18.8	8.4	30	29.4	27.1	33	9.6	17.8	9.4	40.3	23	12.4	13.2	62.8	29.9	24.9	24.3	35.3	17	5.4	15	25.3	28.7	64.6	48.8	46.7	12.5	46.6	15	16.7	-8.1	18.9	8.8	20	16.2	9.4	18	3.4
1270	176.6	71.6	35.1	10.1	78.5	113.5	-36.2	88.3	41.3	82.9	111.9	104.1	75.9	79	151.1	126	149.1	71	97	67	5.8	64.8	56.7	100.2	49.5	74.2	4.1	60.9	93.6	98.3	1.6	65	129.3	77.2	194.9	56.9	15.3	162.2	273.5	68.9	56.6	-21	120.2	114.5	312.3	104.8	113.6	28.9	51.5
1271	-40	-36.8	-9.4	-3.6	-17.6	-35.7	-28.7	-3.2	-54.2	-12.3	-23.6	-36.7	-13.4	-32.7	4.5	-15.3	-23.9	-10.3	-9.4	14.1	-29.1	-5.8	-25.6	-19.1	-17.4	-80.1	-21.4	-8.3	-91.7	-80	-44.2	-26	-13.9	-26.5	-47.2	-8.2	-41.4	-47.4	-5.2	1.2	-31.8	-11.9	-13.9	-8.7	-23.2	-9.2	27.2	-34.3	-6.4
1272	4	-7.1	53.1	109.1	-49.5	128.6	86.6	15.8	-6.1	178.3	128.9	284.8	-29.8	-20	90.9	130.9	-64.3	92.3	96.1	107	141.9	44.7	56.2	129.1	-46.3	-235.3	133.4	144.3	-78.8	-55.8	-50	67.6	134.1	-45	-194	-57.8	114.5	-41.4	123.5	-57.9	-8.3	35.3	-4.5	-89.1	50.7	77.5	230.5	102.1	1.6
1273	-46.3	-76.7	-83.8	-32.6	-75.9	-92.4	-13.9	-84.1	8.3	-40.5	-89	-45.9	-37.6	-59.4	-32.9	-21.7	-20.6	-7.1	-20.3	-40.8	-42.3	-69.5	-16.2	-10.6	-155.4	-75.7	-78.2	9.8	-63.1	-107.4	-85.2	-72.8	-16.5	-104.8	12.1	-45.9	-225.5	-99.4	-61.3	-8.4	-82.4	-83	-86.4	-48.7	-2.6	-27.9	-47.7	-20.4	-35.5
1274	106.2	50.7	31.1	55.8	81.2	18.1	103.5	20.5	56.4	14	17.3	14.4	18.5	50.3	107.3	26.6	20.7	21.4	22.9	20.3	43.9	56.9	54.4	42.3	60.4	41.1	56.5	82.8	49.4	151.7	54.4	61.4	81.1	3.8	180.9	30.6	40.4	59.4	116.5	29.8	65.3	84.2	43.1	31.3	56.2	47	48.4	67.9	24.9
1275	31.1	50.1	11.6	30.2	63.1	27.4	56.4	15.8	0.8	5.5	39	45.1	23.7	51.6	12.8	18.1	-4.3	33.7	43.4	10.2	19.8	1.3	23.5	45.7	-22.2	56.7	21.6	4	-30.3	68.4	3.3	33	54	60.2	-3.8	2.4	92.8	11.4	42.1	48.7	44.3	32.4	95.5	31.2	12.8	18.7	26.1	26.7	20.3
1276	-42.8	-3.6	242.9	5.9	-13.9	1.9	-30.4	1.7	97.4	50.5	150.6	-3	16.3	8.7	32	10.3	146.9	97.2	169.2	-0.7	28.7	20.7	-13.5	33.3	-4.4	54.1	4.4	40.2	-3.3	-17.3	4.2	111	23.4	-10.8	-66.9	36.1	-8.6	17.2	-7.8	31.7	20.8	-25.4	32.8	-5.1	57.5	213.2	-0.4	31.7	-24.4
1277	186.3	238.9	335.6	337.5	283.1	108.2	215.5	222.7	234.2	177.4	139	159.4	348.6	246	380.1	203	363.7	329.1	257.4	451	227	204.9	322.9	176.3	236.5	214.4	89.9	191.9	153.1	216.4	126.4	263.8	154.3	292.6	398	365.1	214.4	343.5	301.5	181.7	293.6	117.6	223.5	260.8	421.7	218.6	307.8	122	136.8
1278	8.9	-7.9	30.8	53.9	17.4	46.3	-11.5	16.9	-136	-111.3	48.8	55.6	-10.3	45.5	-19.3	-28.4	-63.5	-7.5	-2.5	5	65.8	43.3	31.5	25.3	-51.3	-58.1	40.1	-18.3	8.2	-27.5	-47.9	-29.8	47.6	57.9	29.7	-32.4	34.9	-19.9	-139.6	-23.4	11.8	-71.1	34.7	-43.6	-86.4	-30.4	-8.2	3.4	-36
1279	111.5	204.1	87.9	76.8	202.6	165.4	64.2	172.5	370.6	96.2	45.5	73.9	134.4	62.2	96.6	166	169.9	52.1	357.4	617.9	128.9	85.6	93.4	147	40	114.3	78	85.2	79.6	20.9	72.1	76	361.9	123.4	178.1	512.5	114.5	386.4	295.5	358.9	170	35.5	52.8	146.3	412.5	50.9	350.1	57.4	61.6
1280	2410.8	894.7	436.4	33.5	1073.4	2811.9	1087.4	1355.1	282.4	981.8	424.7	1672.1	182.9	200.2	1399.2	1785.1	47.4	498.9	2165.8	2537.9	511.8	306.9	13.4	956.9	43.1	3	1207.6	1964.8	2360.3	2572.4	1880.5	47.8	4674.6	84.5	449.7	102.8	5284.2	1275.8	290.6	3183	530.1	2018.4	1631	814.9	751	1196.2	2799.3	2416.5	1167.9
1281	57.3	-11.3	50.1	38.3	29.7	51.6	19.8	31.8	35.7	-18.1	-24.7	32.5	82	10.2	22.3	16	-16	28	29.2	18.1	74.9	53.6	59.1	4.2	73	28	54.2	53.9	28.2	20.9	28.2	4.1	61.7	74.1	86.9	14.8	93.7	59.5	-23.7	27.7	25.9	2.1	10	17.9	22.5	23.9	30.9	39.8	20.2
1282	525.3	636.1	350.4	308	209.6	331.2	261	210.9	273.1	355.4	360.3	438.9	319.7	310.7	262.3	218.8	343.1	232.7	256.7	214.4	396.8	321.8	392.5	345	103.5	695.6	427.4	235.5	398.4	239	294.9	302.2	349.3	399.4	494.5	272.1	74.8	431.1	179	156.1	297.3	231.2	155.7	231.2	398.7	-33.1	199.5	294.4	336.5
1283	-437.6	-34.7	-300.7	-261.2	-190.1	-127.1	-86.2	-10.2	-35.3	-316.1	-289.9	-403.3	-318.1	-155.1	-216.4	-185.1	-309.9	-265.3	-237.9	-91.3	-382.9	-84.4	-83.1	-113	-551.2	-340.1	-176.7	-132.2	-401.4	-366.7	-128.9	-184.3	-331.6	-538.1	-579.3	-393.1	-443.7	-166.9	-439.8	-341.1	-677	-150.5	-169.5	-209	-452.2	-328.9	-283.6	-787.6	-7.6
1284	-155.4	-45.5	-0.9	9.8	-81.8	-34.5	-86.8	-8.1	6.1	5.3	70.8	-44.1	-20.2	42.1	19.7	-30.7	49.4	34.4	-10.7	4.8	-9.3	-3	-11.5	-4.2	-96.8	16.2	18.3	-27.9	-44.8	-133.9	0.3	-22.7	-128.2	-51.8	-96.4	-5.5	-39.6	-47.8	33.7	-8.3	-16.1	-15.7	-85	35.3	-15.9	-16.7	23.3	16.4	-10.2
1285	-97.4	22.2	64.9	-0.8	-137.8	71.6	-17.5	20.2	-81	66.5	101.6	58.3	26.4	26.6	2.4	-18.3	61.1	-13.4	-31.9	9.4	105.9	34.2	53.6	64.1	-42.2	-164.9	21.4	-26.3	141.4	-210.9	68.9	-44.8	-22.8	-24.8	-167.7	-36.5	-121.9	-96.3	-173.3	-6	-37.9	6.4	141	79.6	-70.2	-33	99.8	62.3	5.3
1286	815.5	302.6	253.5	294.2	582.7	371.5	465.7	256.8	248.1	362	289.1	357.2	325	450.4	298.8	214	325.6	387.9	256.3	287.5	370.9	364.1	476.5	309.8	741.7	323.7	535.3	402.3	526	389.3	343.3	339.1	245.6	283.6	317.6	304	552.9	285.5	556.6	403.3	229.3	579.5	220.5	254.5	188.3	409.5	296	394	451.8
1287	110.3	-5.5	6.5	78.4	19.1	-4.7	56	3	-3.3	16.8	37.9	35.1	-51.1	10.8	56.7	16.3	33.2	-1.6	0.2	-5.4	22	44.8	47.6	39.2	91.8	1.6	82	15.6	141.5	99.7	70.8	8.2	58.2	-10.3	30.2	22.8	63.4	0.1	-42.9	16.3	-8.5	103.3	-45.1	13.3	7.6	6.1	-9.5	41.6	10.1
1288	159.6	212.5	102.9	206.9	162.3	192.1	205.8	134.5	177.3	123.8	189.2	219.7	138.4	201.4	166	154.1	177.1	150	166.7	98.2	174.9	123.3	187.6	204.1	415.7	265	213.3	218.6	273	257.7	146.4	298.6	112.2	181.3	411.6	263.6	303.6	367	374.5	204.5	226.4	344.4	151.8	180.7	161.1	244.6	383.6	215.3	184.4
1289	1600.6	1913.3	1965.2	1840.8	1190.4	1983	1004.7	964.3	4973	1813.9	1770.3	1721.5	1992.3	1552.2	1339.2	3809.8	2646.1	1708.1	1410.7	1876.6	2231	2789.2	2200.8	1513	15446	5529.3	1326.4	1934.9	1746	2647.1	1940.6	1882	1040.7	1330.1	4000.5	998.3	1555.9	3402	1187.5	1612.4	2226.3	1526.5	952.1	1097.6	4982.6	1109.4	2284.2	1647.7	1613.8
1290	-3.4	14.7	14.7	-12.6	-4.4	-7.9	30.9	-3.8	3.6	-5	-8.6	-2.6	-1.7	2.7	30.1	6.6	-2.2	3.9	-2.3	1	3.5	11.3	4.1	-2.8	87.7	49.6	2.7	13.9	70.8	51.8	15.4	2.8	2.8	-6.3	17.6	-1.8	50.5	-4.5	7.2	29.6	8.1	28.3	11.7	12.6	0	25.4	14.1	-2.5	10.7
1291	-73.6	43.6	66.7	-33.2	-92.4	-96.9	-88.9	37.9	29.1	36.7	52.7	-95.1	-32.5	-6.1	-21.7	-17.1	-9	-43.4	-48.4	-38.4	50.7	65.2	-41.4	146.1	77.7	12.7	-43.5	21.9	100.5	-38.5	60.1	-93.1	-110.7	-37.9	-127.4	-27.8	-187.4	-49.2	134	65.3	-175.5	-99.8	-53.9	84.2	38.3	8.8	-147.3	-161.1	-63.3
1292	20.7	11.8	20.1	5.1	-9.7	-2.9	13.4	-15.2	43.7	1	39.4	16.1	-11.2	25.5	6.2	7	36.3	11.3	4.7	5.3	14.3	2.5	6	14.9	18.7	-46.1	-6	-26.9	-8.5	4.6	-8.2	-3.3	-6.6	-15.8	-22	-10.8	-19.4	-14.1	23.1	-16	12.9	6.7	1.8	-21.1	-13.7	-13.3	1.4	9.5	9.7
1293	165	725	225.6	429.4	1405.1	620.6	412.8	261.3	548.7	261.9	113.8	291.1	477.5	681.6	917.5	137.1	889.8	135.4	75.9	770.2	124.5	445.6	103.3	301.6	153.4	359.7	253.1	631.9	342.5	166.9	540.6	196.7	68.3	263.5	282.6	262.4	33.3	446.6	312.2	158.7	160.7	284.2	529.5	79.3	176.4	113.5	490.7	606.4	450.9
1294	415.2	577.9	615.8	527.8	396.2	567.6	326.5	539	640.5	325.2	584.3	431.2	621.3	732.2	356	583.6	832.5	608.9	592.5	333	514.2	424.6	470.2	427.8	648.7	893.3	484.1	702.1	634	826.9	445.8	526.2	408.8	969	565.1	481.1	610.3	585.5	728.5	578.5	699.8	766	485.7	555.3	655.8	748.7	617.2	499.2	471.6
1295	-6.1	-9.4	6.4	27.5	60.3	54.4	27.2	18.9	-38.6	25.9	14.9	10	178	267	272	15	8.3	12.3	108.8	14	378.8	180.5	37.7	658.3	-9.5	48	357.5	227.1	164.9	78.1	363.5	229.6	100.9	78.9	0.1	-1.3	53.3	7.6	32.4	78.8	16.6	99.2	27	139.9	21.1	15	35.8	43.6	49.6
1296	368	320.6	322.4	192.9	339.2	342	319.1	166.5	390.3	333.2	440.3	260.5	199.6	184.4	142.7	129.5	456.5	286.4	200.3	165.6	218.9	210.6	232.4	269.9	400.5	281.9	206.7	262.3	328.6	436.3	309.4	289.3	282.2	360.7	407.5	293.6	294.7	274.9	484.3	341.1	229.4	397.9	305	178.5	272.4	304.5	233.7	251.5	234.3
1297	49.8	185.2	71.5	39.6	68.8	54.1	89.3	112.3	64.7	39.3	40.1	32.9	50.5	83.6	120.4	28.4	22.3	152.3	40.9	71.5	61.4	76.2	67.3	82.8	77.8	129.3	92.8	87.2	115.4	59.7	55.5	100.8	54.3	33.4	65.7	106.3	178.6	40.7	80.4	47.4	64.7	106.1	101.7	82.4	26.3	50.9	37.2	59.4	157.9
1298	127.2	43.3	91.8	140.2	132.4	97.2	221.6	134.8	108.2	51.4	137.5	85.4	146.9	182.5	215.4	193.6	80.9	48.4	88.5	119.4	126.8	57.8	96.9	157	101.2	154.8	132.6	111.6	133	52.3	88.6	126.7	87	139.8	105.2	89.9	86.3	103	113.9	109.2	151	125.4	88.4	186.1	76.5	129.5	69.9	91.2	63.5
1299	49.1	-69.7	21.2	9.9	-33.4	-28.8	30.1	13.7	-5.4	40.1	53.4	56	42.8	23.4	18.2	15.6	60.4	-6.4	28.9	20.9	24.2	24	32	28	66.5	27.7	45.7	27	-59.6	4.4	14.2	42.3	30.5	45.6	2	37	17.9	32.3	7.1	4.6	-0.4	-13.5	10.4	7.3	-81.4	-49.4	24.7	39.9	63.9
1300	83.8	76.5	243.3	193.1	127.8	220.4	97.9	142.5	63.5	61.3	68.4	67.7	132.8	170.8	214.8	113	94.3	184.8	114.2	130.1	99.3	90.8	215.2	198.5	358.8	86.7	90.9	166.8	179.8	127.8	60.4	167.3	112.6	246.3	38.3	179	98.7	132.1	91.3	156	242.5	49.8	48.5	128.9	96.4	216.1	127.4	124.2	101.1
1301	101	10.7	9.5	40.8	53.9	-26.2	63.6	0.5	75.5	48	74.8	105.1	-3.3	13.4	-11.8	-8.3	67.7	-2	26.3	-8	62.8	18.6	39.8	21	48.3	-17.6	37.9	35.5	79.3	-36.7	8.6	3.5	2.4	87.4	48.8	37.4	-4.4	-41.2	-52.7	-15.6	7.6	73.5	94	23.3	-60.7	-16.7	-15.9	46.3	-18.3
1302	107.6	75	9.3	28.8	26.7	71.7	5.6	-20.6	182.7	48.9	49.6	59.8	37.5	51.9	-20.5	-15.6	80.3	-18.7	34.5	25.4	22.6	63.1	19.9	62.9	52	-114.2	40.4	108.5	123.4	-9.1	-7.4	23.2	19.4	55.7	17.8	-59.5	-66.4	-23	14.5	-62.4	-44.1	40	48.7	5.2	96.5	-29	-22.7	55.4	-52.8
1303	149.5	172.3	31.5	7.4	64.6	96	132.9	141	331.6	178.4	506.3	422	116.1	47.9	69.1	64.5	375.8	207.3	185	90.4	68.3	148.5	79.4	163.6	137	180.3	261.5	192.3	180.3	54.2	99.7	202	175.5	98.8	-144.2	32.3	107.6	150.1	177.2	218.2	8.5	69.9	22.7	115.2	257.7	144.2	122	413.2	228
1304	760.3	544.3	675.5	1791.8	20.9	-100.9	-224.4	149.7	10.1	108.8	349.2	-20.2	754.7	676.2	-36.1	119	544.5	304.3	618	-32.1	314	23.7	907	515.1	-283.8	-23.5	2286.7	231.2	257.6	-168.6	591.3	97	154.1	855.3	394.6	61.9	1972.2	-111.7	1831.6	838.6	215.3	-94.4	1079.8	449.4	1004.1	16.2	971.1	183.6	2178.6
1305	-13	12.7	31.5	16.5	36	14.4	-97.3	15.7	9.6	24.5	-33.5	-20.1	29.1	49.9	-7.5	3	-17.7	-45.1	-4.5	4.2	-40.6	42.3	38.5	34.8	25.9	114.4	37.7	64.6	34.4	-3	26	32.8	-0.4	40.3	-71.7	24.2	19.4	1.1	71.3	14.7	87.1	-88.9	38.5	11.6	23.4	16.2	16.8	11	21.7
1306	1202.8	236.6	366.9	243.5	589.5	319.5	206.1	890	369.4	385.2	236.6	835.5	205.4	498.3	443.8	1796.6	222.4	392.8	1924.4	1024.5	546	480.8	406.1	321.7	143.6	257.2	376.1	403.5	993.4	682.2	561.7	584	771.2	110.3	193.8	489.8	1280.5	493.4	346.2	814.2	854.7	601	518.4	654.7	168	725.1	855.8	537.5	310.5
1307	18.7	-41.5	4.9	10.4	13.3	-3	22	29.7	53.3	24	15.2	14	-3.5	8.4	3.1	11.7	4.5	17.9	20.7	6.4	-16.6	10	11.8	-0.1	-21.5	31.3	21.6	22.1	79	-74.7	9.9	-10.9	23.9	-8.1	69.3	5.6	59.4	14.1	18	-2.7	2.2	3.4	-13.1	3.8	1.4	29.2	16.8	41.7	18.8
1308	0.5	5	12.4	12.9	62.2	-2.4	7.3	9.8	27.9	13.4	11.3	42.2	8.6	21	39.5	13.1	13.3	9.5	24.5	11.6	-16.9	4.5	24.2	26	-26.7	-11.8	-2.6	19	80.6	18.8	28.5	14.7	10.5	10.9	50.3	9.1	3.1	13.7	-10.6	19.9	-10.5	-24.7	21.5	23.9	-2	43.1	27.5	14.8	33.5
1309	-58.9	137.7	121.6	-8.3	1.3	-0.3	-57.4	12.4	6.5	-8.2	-54.4	-40.3	156.1	36.3	226.7	-1.3	42.4	14.8	41.7	-8.1	165.6	399	-23.9	438.9	59.7	0	28.9	105.1	10.4	-76.2	68.1	43.6	27.3	25.5	-38.6	29.7	-16.7	-32.9	169.8	-3.3	125.6	-43.6	139.3	347	-32.2	140.4	5	93.5	39.6
1310	207.2	205.4	237.2	138	51.2	202.4	21.7	143.6	189.6	109.9	140.4	100.1	147.3	121.6	158.2	93.1	108.7	174.1	179.1	80.5	148.5	134.2	117.8	67.6	290.9	263.5	163.2	166.5	147.5	288	99.3	188.9	51.9	152.9	81.2	122.4	180.5	215.2	296.1	282.3	162.3	171.1	42.5	127	138.2	166.1	191.7	55.7	159.2
1311	-25.6	73.9	35.1	73.7	75.3	60.4	-111.7	59.7	252.3	137.6	-50.9	-40.1	279.7	43.6	17.3	36.3	30.3	75.4	140.4	153.4	-0.7	23	26.5	36	242.1	33.8	14.9	92	49.4	236.6	59.4	70.7	38.5	80.5	-233.3	156.2	247.3	122.3	171.8	102.3	192	10.6	-34.5	55.5	98.9	170.7	116.1	36.6	71.7
1312	214.1	225.2	190	85.9	96.6	322.4	238.3	144	236.9	216.2	204.4	157.5	140	165	176.7	326.2	181.4	189.5	351	300.6	182.2	194.7	132.8	208.4	155	865.8	159	169.7	278	225.1	182.8	278.4	206.1	152.6	323.1	448.8	427.9	507	433.9	325.1	337.6	279.5	201.8	272.7	444.8	560.1	517.2	133	197.3
1313	-4.3	-2.8	11.4	7.7	-18.3	15.5	13.1	-3.2	-34.5	-4.5	-9.7	-6.4	42.2	7.9	59.3	5.6	8.6	-2.5	14.1	-7.2	70	38.1	-0.7	56.3	-27.7	-7.1	29.6	28.4	0.6	-2	67.1	20.2	17.8	55.7	47.8	-10.5	3	-0.3	9.1	1.4	-7.4	-43.4	51.6	-5.1	5.7	27	-20.1	3.8	32.1
1314	-99.3	183.7	-162.4	169	-150.4	-191.4	-30.9	-5.7	-354.4	-43.5	-115.1	-99	-19.6	1.3	-26.6	-50.9	-180.4	-106.4	-44.6	-10.1	153.5	-81.1	6.8	203.8	-136.1	-317.1	161.3	51.4	-109.1	-499	5.7	-51.7	-138.5	-87.4	-680	-148.4	-350.4	-237.9	-144.6	-103	-256.8	96.6	-131.1	-119.8	-263.3	-251.3	-260.1	-24.7	108.2
1315	106.7	140.1	63.4	66.5	42.9	287.8	77.2	17.3	80.1	12.6	91.8	4.7	24.7	74.5	84.9	29.9	-71.3	41.4	59.8	19.7	132.7	160.2	91.2	97.9	179.9	30.4	116.8	227.2	238	178.8	94.2	19.1	50.2	39	-73.4	35	78.1	40.4	26.5	70.8	44	106.2	-23.4	87.1	135.7	96.7	174	69.8	156
1316	391.9	288.7	210.2	201.3	89.5	173.4	328.2	245.9	250.1	179	174.7	139.9	157.2	203.3	229.7	154.6	81.8	265.7	104.1	161.9	297.6	164.2	211.3	192.4	123.1	119.3	182.8	135.8	250.8	238.2	139.3	260.9	221.5	154.1	265.5	328.2	284.4	131.4	149.1	159.9	166.5	180.5	184.9	183.1	103.3	244	176.6	95.7	168.1
1317	42	119.7	27.4	57.5	64	8.2	32.4	35.4	-11.8	15.1	43	-12.4	67.5	38.5	58.1	34.1	8.3	51.6	39.4	54.6	76.5	59.6	48.5	69.1	54.4	27	59.6	41	94.6	44.6	98.4	57.2	30.3	71	52.4	63.7	74.1	32.3	92.2	59.6	68.3	74.2	62.4	40	58.6	48.5	37.7	14.5	26.7
1318	75.2	235.5	99.7	58	41.9	95.6	90.2	68.8	80.8	100.4	89.7	114.1	87.1	69.6	74.8	60.3	206.6	74.1	113	162.1	14.9	85.8	68.6	84.6	111.8	55.7	85.9	37.4	95.8	23.9	81.9	158.1	66.1	75.8	176.6	305.9	154	84.7	208.5	125.7	195.3	81.9	144.3	89.4	162.5	99.6	201.2	44.3	50.1
1319	416.8	557.4	274.4	333.9	233.5	435.9	346.1	174.6	111.8	393	263	272.2	326.6	396.9	166.5	125.6	138.9	272.5	304.3	155.4	441.7	383.5	405.7	372.9	281.4	158.6	569	484	492.1	418.4	358.9	350.5	399.2	448.7	74.6	102.1	551.8	154.1	31.2	303.5	91.8	644.1	410	228.5	136.2	260.6	252.3	281.6	567.2
1320	60.9	55.6	48.2	48.4	46.4	67.3	118.8	48.8	60.7	73.1	48	72.6	180.2	78	220.1	31.2	62.4	29.8	61	35.1	198.1	69	34.1	212.5	102	115.4	216.9	136.3	171.7	197.8	221	197.8	114.2	187.4	175.9	80.2	196.6	88.6	135.3	81.2	61.5	67.4	36.5	106.2	27.2	59.9	68.4	128.7	32.6
1321	200.1	30	140.1	100.4	248.9	254.9	120.8	160	228	115	73.3	84.1	94.6	70.1	144.9	60.2	40.8	58.8	116.6	28.2	75.8	23.5	199.4	104.1	224.3	140.9	151.2	272.2	90.7	256.5	99.5	97.2	179.8	158.2	33.4	60.3	209	133.3	51.9	158.5	36.5	208.9	181.9	82.2	33.3	84.6	175.4	66.4	186.2
1322	226	230.8	280.9	109.9	249	202.8	230.1	461.2	160.4	261.6	169.7	234.5	361.2	392.1	171.2	219.9	174.7	176.5	348.8	152.6	319.8	280.6	236.7	390.1	146.7	686.7	328.2	415.3	281.4	259.3	373.7	322.5	246.2	344.7	139.2	97.4	434	293.9	73	104.9	268.6	328.4	235.9	275.5	277.6	418.2	219.6	447.7	204.9
1323	-41.1	-40.1	-10.9	11.6	-45.7	-60.2	-40.2	0.2	-46.5	-69.2	-109.8	-72.6	-17.7	-49.4	-20.6	-3.6	-61	-28.9	-37	-39.9	-31.1	-29.6	-13.5	-19.3	-114.5	-128.5	-27.3	-50.7	-106.8	-104.7	-55.6	-39.4	-39.5	22.1	-130	-19.5	-125.2	-90.7	-97.9	-46.3	-24	-38.6	-71.5	-22.4	-82.2	-54.3	-53.3	-78	-84.3
1324	161.7	183.3	165.7	124.5	126.9	151.9	100.2	94.2	161.4	119	89.1	64.4	143.6	128.1	150.1	105.6	190.5	128.2	137.3	81.1	236.9	193.4	174.6	223.1	89	161.9	154.3	182.3	264.4	90.4	141.1	268.8	126.9	120.1	125.6	370	92.3	177.8	129.6	139.3	224.9	134.8	129.5	248.3	185.4	188.7	235	95.5	131
1325	69.2	-11	17.7	10.9	-5.8	-12.1	57.9	5.3	33.1	-2.2	15.2	14.7	14.5	16.5	14.2	2.7	2.5	10.8	8.5	0.2	37.5	23.2	-1.1	12.7	-25.8	-1.7	27.7	24.1	33	78.3	33.9	17.7	47.6	19	50.7	8.9	-61.6	-0.1	36.6	16.2	13.6	-3.6	3.9	20.3	-706.3	32.1	17.4	1.5	19.9
1326	-21.5	-2	-3.2	-6.3	-28.7	7.5	-14.5	-1.2	13.2	-26.5	-15	-25.7	1.8	4	-15.4	-6.1	-20.9	-13.3	-14.6	-7.1	-1.4	0	-19.8	-11.1	-26.2	11.1	-11.8	-12.1	27.3	12.9	-12.6	-22.5	-22.8	-42.7	-69	-11	25.8	-7.6	-12.6	-21.1	-17.2	-4.2	-22.6	-12.5	-34.9	-12.6	-23.5	-21.4	-11.3
1327	-322.2	13.1	57.5	31.1	-130.3	34.6	-299.2	48.1	328.8	11.8	60.2	-16	9.5	-25.5	-82.9	75.2	-21.2	38.8	38.5	-14.5	-86.3	39.3	35.4	29.8	6.2	-13.1	-48.4	48.7	-327.6	-232.4	-18.8	36.7	-22	-31	-110.6	-97	-202.1	-73.8	-165.6	43.7	-49.4	-2.6	-31.9	-21	240.1	-114.8	111.3	-101.3	21.9
1328	-21.5	-3.8	-61.4	-60.5	-38.8	-68	-49.3	-36.3	-86.6	-9.4	0.8	-36.7	-34.1	-1.3	-51.9	-18.5	-15.8	-25.4	9.8	-24.4	-3.8	19.7	-8.3	-22.8	28.8	-93	22.4	-68.8	-132.6	-348.6	-53.3	-115.4	-8.2	-94.8	-195.1	-65.9	-117.2	-125.9	-262.8	-43.4	-144.6	-159.3	-107.2	-96.8	-61.4	-31.7	-53.3	-68.1	-44
1329	347.9	210.7	148.9	108	547.8	138	355.1	106.6	214.8	221.5	101.3	209.6	218.3	220.2	169.5	111.2	160.6	173.9	167	92.7	236.3	225.6	277.1	181.9	320.4	326.3	173.3	194	182.7	220.5	162.5	226.6	328.9	258.9	397.1	94.4	122.1	-45.3	-71.8	144.9	186.8	207.1	195.2	147.5	180.8	195.9	114.1	203.7	125.6
1330	27.4	47.3	24.7	33.3	45.6	35.8	46	34.7	99.6	21.8	0.9	-8.2	54.3	-5	8.4	16.1	9.9	8.8	13.9	23	7.2	26.5	35.5	21.5	20	133.8	20.1	29.2	87.5	-10	38.8	52.6	64.8	40.5	129.5	51.1	77	75.4	81.8	5.1	60.4	34.9	12.3	9.6	46.9	11.4	25.5	13.9	22.3
1331	84.2	47	51.1	53.2	68.5	33.4	70.3	57.6	110.1	48.4	50.6	36.6	41.4	53.8	68.1	27.6	78.9	66.7	86.3	67.9	40.2	40	66.2	68.1	61.8	107.5	65.8	50.1	157.6	158	30.2	79.1	89.8	128.9	106.7	123.5	159.8	86.1	126.5	83.8	32.3	37.5	117.8	107.7	118.8	124.6	160.2	49	119
1332	1029.5	607.4	571.9	689.3	301.3	724.4	713.5	490.8	1192.2	863.9	994	1159.7	703.8	395.2	527.1	352.4	1060.7	787.4	716	506.5	691.7	532.4	762.6	419.2	1075	820.1	479.9	509.1	417.4	696.9	252.1	489.6	484.2	520	1599.2	453.6	1066.1	870.3	1237.3	1167	615.6	468.9	302.9	269.6	1127.8	758.7	610.1	1055.9	665.2
1333	374.9	192.4	134.1	279.6	217.8	276.7	301.1	228.8	183.2	235.6	247.1	244.8	291.9	280	345.5	145.9	106.4	140.4	221.3	313	221.4	238.5	198.4	274.3	181.7	146.3	351.3	170.8	254	262.2	509.5	313.6	459.6	290.9	495.9	282.8	255.5	654.6	331.7	295	218.9	205.1	318.6	237.2	204.6	259.3	206.5	118.2	254.5
1334	310.4	172.4	197.2	233	261.9	315.4	186.9	207.6	459.1	227.8	264.4	287.4	178.7	243.1	139.8	61.5	308.4	207.4	210.1	201.8	119	266.1	228.7	171.4	438.3	319.9	208	276.8	32.8	230.3	160	102.5	494.7	103.3	284.1	71	199.1	228.5	236.8	248.6	143.7	278.5	113.8	176.4	323.9	178.7	181.6	254.5	212.9
1335	56.5	71.7	122.3	65.2	95	35.9	18.5	46.7	98.5	91.5	123.7	44.7	75.4	44	58	57.2	97	106.3	49.6	103.5	44.6	25.5	125	69.7	49.5	9.9	42	25.5	43.4	64.3	31.4	45.9	26.5	91.9	12.7	246.7	45.3	136	63.5	87	96	-24.6	19.1	49.9	78.9	61.7	37.8	70.7	60.6
1336	-1144.5	-402.2	-242.4	-722.5	-720.9	-575.8	-1337.6	-300.9	-461.2	-400.1	-149.9	-327.2	-536.1	-505.9	-606.6	-259.5	-426.4	65.9	-478.7	-224.6	-694.1	-395.8	-513.5	-251.5	-810.2	-1072	-563.9	-483.6	-1168.6	-862.1	-515.9	-842.6	-678.3	-135.8	-1880.9	-477.1	-392.4	-273.8	-608.9	-586.7	-336.8	-560.9	-930.5	-284.6	-250	-425.5	-243	-341.2	-131
1337	70.8	44.6	20.3	22.3	57.5	33.9	44.7	33.8	33.9	21.1	27.8	40	29.9	23.7	44	2.8	27.7	26.3	14.4	16	24.7	10.5	28.5	29	34.4	84.1	37.5	20.2	42.7	60.3	31	34.6	48.1	53.5	91.6	40	12.5	40.8	43.7	35	45.6	65	58.2	39.2	128.8	26.6	20.5	21.2	22.4
1338	-441.7	-168.1	-71.7	-106.7	-254.9	-188.4	-380.3	49.6	-175.4	-186.6	-267.1	-240.4	25.6	-120.9	-70.3	41.6	-55.1	-12.8	-21	-156.4	-112.3	-92	-108.4	-50.6	-321.9	-83.4	-193.7	-134.3	-335.2	-545.4	-130.4	45.3	-72	-379.2	-434.7	48.6	-100	52.8	88.3	81.1	-4.6	64.8	-100.4	-54.9	112.1	85.9	-32.9	-314.9	-139.1
1339	-8.3	21.6	30.8	36.5	17	2.8	-365.7	-90.4	72.5	-23.7	5	-58.9	34.6	69.4	58.3	-49.7	57.7	-102.6	-124.2	-116	-37	54.3	-86.4	-8	-120.5	-7.2	30.8	25.3	86.5	30.1	89.6	39	43.9	12.5	-17.9	64	8.2	-6.1	-38.4	70.4	-63.4	-19.3	115.6	26.9	41.2	47.5	-73	104.8	-23.8
1340	-63.1	28.7	115	42.2	-25	-19.7	-21.8	13.2	24.9	6.6	51.1	-6.7	44.8	21.4	58.1	43.1	76.6	30.5	41.4	63	-36.8	25.4	-29.9	8.9	53.3	42.7	6.3	23.3	47.8	51	-0.1	20.4	22.4	-2.9	-23.1	22	36.9	60.6	97.3	32.6	124.7	-51.3	-98.9	67.9	121.9	96.8	107.2	-6.7	10.2
1341	-415.9	-238	-380.7	-175.6	-418.3	-205	-154.3	25.9	-256.8	-76.5	-219.6	-167.8	-207	-276.4	117.4	-94.7	-482.7	-137.7	-110	-4.7	-483	-91.4	-222.3	-230.7	-185.4	-945.9	121.4	-113.1	-510.7	-1302.6	-350.5	-485.5	-231.1	-647.1	-839.5	-367.3	-262.5	-478.1	-814.8	23.4	-442.7	-437.6	-322.9	-40.7	-27.9	-160.8	-260.4	-439.5	-113.8
1342	-11.6	22.9	12.3	-1.5	1.9	14.6	22.2	-12.9	130.2	10.2	8.6	7632.7	25.8	-30.6	474.4	18.3	3.9	-16.3	5553.8	-3.3	16.7	-23.7	11.7	-3.5	13.8	23.3	59.6	6.3	-8	17.1	46.6	36.2	3.2	4.9	36.5	-4.7	33.1	3.5	-13	34.1	-21.8	11.6	37.8	130.9	30.2	19.9	6853	307	-18.7
1343	5889.3	12939	1826.8	3486.2	6288.9	10474	4347.1	4574.9	3351.6	3506.7	3711.6	4324.9	3073.5	4660	2951.3	1592.7	3985.7	3089.7	3022.9	3414.5	3500.7	4292.8	4505	3807.6	3313.3	969.5	3714.4	9096.8	9400.3	4425.4	5488.4	3990.6	4459.4	5431.8	4127.2	4896.6	13374	3762.3	2624.1	2705.9	1961	11120	5931.3	2532.9	4240.2	7726.5	3253.7	4362	4470.3
1344	37.4	70	61.9	46.2	35.9	50	44.2	22.2	174.9	28.7	22.1	1.8	74.2	52.6	53.2	16.7	2.2	44.7	39.9	17.6	41.7	38	70	20.2	124.6	57.7	57.1	41.5	109.5	75.7	115.5	81.6	54.3	66.7	133.4	26.3	89.2	31	41.7	38.7	47.3	90	61.2	14.8	34.8	14.4	37.6	41.4	47.6
1345	-1.3	7	41.5	12.9	73.7	19.9	9.4	4.4	16.2	17.5	68.8	7	15.9	26.3	16	6	118.4	37.4	28.7	21.9	28.8	15.2	18.3	0.2	46.1	49.8	29.9	38.7	25.3	54.9	34.3	9.6	19	40.9	45.2	10.4	33.1	47.3	53.8	5.5	45.8	46.6	45	20.7	55.2	24	15.3	26.8	12.6
1346	383.8	2148.4	1288.5	434.7	334.8	1131.4	421.8	577.9	217.7	889.9	796.6	612	374.7	490.1	267.5	918.3	597.9	1974.3	748.9	1244	340.8	534	441.5	571.3	387.6	255.9	331	607.7	441.9	542.9	426.2	973.5	624.4	493.1	362.4	608.4	840	461.8	276.7	1036.4	536.7	810	463.5	141.2	147.4	779.1	516	607.5	950.5
1347	448.2	148.2	257.6	106.7	57.3	69	352	70.9	-63.3	125.7	179.2	136.9	219.2	68.2	144.7	79.6	257.3	69	63.3	76.1	118.1	258.8	161.6	122.8	209.2	-25.1	213.5	97.1	269	85	45.8	406.8	123.4	301.5	463.4	101.9	135.8	60.4	-17.2	40.2	121.4	220.8	344.5	91.2	36.2	37.6	120.6	38.1	89.5
1348	66.1	71.7	45.2	40	69.1	65.5	48.8	38.6	80.2	24.8	37.7	52.4	45.1	47.8	85.5	34.1	50	63.7	37.2	20.8	60.2	45.7	33.7	49.5	56.3	128	57.6	22.6	37.3	17.3	65.1	72.5	91.5	64.2	111	29.8	123.9	45.2	39.2	86.6	32.5	54.9	76.2	190.8	53.2	28.7	25.9	51.2	30.7
1349	-132.6	-133.4	-67.1	-17.2	-168.6	-113.8	-209.6	-1.1	-105	51.8	-60.2	-39.9	-104.4	-109.3	-60.5	-50.3	55	-3	-11.7	-12.3	-58.5	32.7	-16.5	-35	-281.6	-158	-32.1	-99.5	-277	-322.6	-88.9	-53.5	-25.2	-88.4	-133	-99.1	-178.4	-102.6	-143.7	-128.2	-148.3	-81.7	-143.4	-54.3	-78	-191.4	-97.4	-22	20.8
1350	75.9	158.4	4.2	-6.4	14	-25	-48.4	12.2	127.6	60.3	111.1	21.5	60.2	102.8	82.8	67.5	134	143.5	141.8	86.4	36.5	90.6	-0.7	30.3	137.6	-21.2	76.1	59.2	196.7	65.1	10.3	63.1	-26.5	77.8	-84	48.6	192.4	66.9	112.6	7	-15.6	47.3	64.8	-14.4	-12.3	189.4	-11.9	-5.9	3.9
1351	267.5	219.6	320.9	515.1	435.9	406.7	452.3	436.5	423.6	307.6	219.6	243.6	462.4	744.7	365.8	112.6	296.6	371.9	140.7	313.2	343.4	372	423.6	351.3	268.9	483.8	368.1	374.7	298.5	213.4	292.5	556.3	446.3	449.1	299.5	408.2	316.2	416.7	170.4	273.6	581.6	180.7	420.3	245.1	146.4	280.1	324.4	305.4	521.9
1352	112.2	456.4	744.3	336.9	-17.4	166.2	12.4	86.4	651.1	124.1	274.2	133.1	146.6	223.3	97.7	341.3	2136.8	256.9	241.1	97.9	135.1	237.4	94.7	145.6	1341.2	198.7	231.9	126.7	78.9	125.9	51.7	64.8	-7	166.2	279.7	141	-103	226.7	285.8	228.4	264.9	119.3	-35.4	319.2	1558.2	316.4	315.8	-50.6	125.8
1353	-7.1	-11.8	-5.1	-11.6	-22.7	-5.7	-10.2	-6.1	-2.9	-4.1	-9.7	-8	-21.2	-18.1	-1.1	-6.8	0	-7.2	-2.2	-0.2	-11.2	-6.8	-17	-2.2	-16.6	-10.1	-27	0.4	-16.9	-25.6	-14.7	-21.8	-1.1	-19.6	-59.9	-5.6	-16.1	-21.6	-11.3	-36.6	-18.2	-49	-25.8	-18.1	-12.1	12.8	-21.3	-1.6	-6.2
1354	99.2	106.7	135.8	35	115.4	54.7	97.6	77.3	0.9	47.4	71	147.3	23	69.8	88.8	75	52.5	5.1	59.3	21.4	90.3	30.4	1.8	49.3	145.7	90.8	26.2	136.7	49.5	145.3	66.8	126.3	191	95.3	326.6	55.3	198.6	135.3	281.2	87.3	189.9	13.5	105.5	161	64.3	199	65.5	87.9	56.5
1355	28	44.9	25.2	23.6	34.2	22.5	80.2	27.3	10.4	11	27	24.4	27.6	10.7	23.4	11.5	29.1	18.4	17.8	12.5	20.9	18.8	4.8	12	-5.8	27.6	14.8	37.6	3.5	47.6	24.9	24.3	38.9	14.3	124.9	35.4	42.1	31.7	67.9	37	39.6	40.2	42.4	9.8	44	37.7	24.5	25.4	24.3
1356	-24.5	-10.3	-0.6	-5.9	49	-38.9	-107.5	-1.4	35.2	-35.8	-44.5	-61.9	56.7	13.6	-44.5	-9.8	14	3.2	-22.1	-19	52.7	-25	48.4	18.9	-46.6	75.3	33	-57.3	-79.1	-350	-27.1	0.6	8.5	-77.5	-93	-35.5	-92.4	9.8	113	-114.4	19	106	35.7	-27.9	-31.8	-35.1	-10.6	42.6	-19.3
1357	266	327.5	306.8	196.2	372	315.9	415.8	271.8	629.9	233.7	287.1	397.9	374.3	274.1	359	429.5	267.6	302.4	359.5	365	234.8	282.5	217.8	206.6	194.6	442.9	289.9	230.9	360.9	296.2	215.2	462.5	330.4	367.1	461.9	477.4	285.1	674.8	365.5	389.9	664.5	183.7	295.9	344.1	418.5	454.3	732.5	247.7	363.6
1358	144.1	98.7	119.9	153.8	72.8	111.9	96.7	75.3	212.9	174.1	198.2	133	103.1	125.5	151.3	72.1	448.8	70.7	110.3	80.4	132	108.9	116	121.6	181.8	146	76.1	131.1	117.7	135.1	107.1	121.7	102.2	188.1	245.1	159.7	76.2	143.4	126.8	102.6	141.8	136.4	53.1	121.6	223.5	91.9	127.1	113.1	89.2
1359	701.9	380.8	315.4	543.8	579.3	375	899.9	565.8	587.3	501.1	710.8	720.5	364.9	356.3	609.2	297.1	649.5	622.4	513.9	397.4	515.5	394.6	664.7	429.5	880.2	324.8	703.4	618.4	764.3	723.2	297.4	406.5	700.7	803.7	922	482.1	678.3	648.3	506.6	572.3	448.6	411.9	671	397.6	450.5	360.3	598.9	659.8	595.4
1360	30	32.2	-2.6	-3.5	48.2	-14.5	67.1	13.2	32.5	90	97.8	40.5	1.5	59.6	66.7	19.3	201.3	86.7	26	22.7	48	-4.6	35.8	36.6	13.4	-10.8	38.1	-11.9	-1.8	49.5	0.5	41.1	-3.4	75.4	111.3	10.7	54.8	34.7	39.9	-20.4	102.4	14.7	52.1	38.1	-1.6	26.6	58.9	46.7	35.3
1361	-51.4	-3	-30.9	-24	-45.9	-17.4	-65.4	-28.6	-31.9	-27.2	-45.1	-46.7	-42.7	-25.7	-16.9	-9.3	-41.5	-21.1	-17.7	-18	-21.2	-16.4	-23.3	-21.7	-57.7	-11.8	-12.8	-22.2	-57.2	-84.7	-37.9	-47.4	-75.1	-34.4	-36.1	-17.3	-36.9	-33	-45.4	0.5	-77.6	1.1	-47.4	-20.1	-20.2	-23.6	-29.8	-44.7	-25.7
1362	368.7	355.1	303.5	301.1	128.7	185.2	291.5	297	186.6	409.4	493.1	279.7	306.3	167.1	370.7	139.5	438	316	497	294.4	255.2	252	246.1	274.1	286.4	621.1	338.8	286.8	524.4	329.2	358.3	287	388.9	325.1	423.9	194.1	416.1	530	413.6	347.9	325.8	314.5	305.2	341	376.5	399.2	316.9	278.1	382
1363	31.4	7.3	150	74	105.1	52.8	25.7	70.3	126.3	5.5	10.7	50.7	79.1	53	56.3	101.1	24.7	39.7	65.9	113.1	62.8	49.1	96.5	17.8	120.7	-3.2	36	42	88.3	165.8	46.1	17	62.6	123.9	265	107.5	87	165.7	80.7	40.8	147.3	-75.8	54.9	62.9	106.5	144.4	141.7	16	22.6
1364	1146.9	622.5	499	836	582.7	314	613.7	363.3	582.5	351.6	196	364.9	666.5	492	576.3	552	359	549.7	147.7	499.3	251.5	546.4	354.7	176.8	879.2	370.9	335.9	305.1	310.4	714.1	367	483.8	126.5	474.7	516.7	1809.6	342.4	485.3	285.8	359.1	1097.4	390.5	297.1	309.3	853.4	208	725.7	203	272.6
1365	401.2	427.5	86.5	40.9	270	92.1	207.9	116.2	548.6	335.1	447.1	409.1	199.3	175.1	133.8	53.3	448.8	29	34.3	83.1	245.2	144.5	270.6	96.4	538.6	797.2	346.6	253.5	670.4	391.3	307.8	131.2	289.7	-48.5	180.7	185.3	363.8	184.9	62.6	-6.7	100.9	626.4	243.5	328.4	347.8	261.6	244.3	385.1	219.1
1366	-99.2	-1.9	-24.2	-11.1	-37.3	-113.2	-72.3	22.3	-89.6	-42.9	-27.6	-46.4	-7.8	30.3	3.3	19.2	-57.2	-29	-1.4	21	-44.1	-15.6	-4.1	-8.8	-130.2	-207.2	-25.2	-97.8	-92	-300.4	-10.3	-46	9.5	-51.1	-198.2	-81.1	-213.6	-105.5	-190.4	-77.1	-97	-63.5	-57	-81.1	44.2	-72.7	14.3	-42.8	-12
1367	131	140.7	86.5	173.1	175.8	169.1	127.7	129.2	88.6	157.6	46	122.5	131	168.4	108	113.8	222.7	-0.3	46.7	163.8	111.7	212.7	89.3	106.9	229.4	57	197.6	105.9	64.9	117.6	84.7	127.4	130	188	136	279.3	134.8	250.8	290.2	216.6	307.4	95.5	140.4	92.9	105.9	87.1	159	172.2	151.5
1368	38.1	19.8	28.6	11	20.3	19.6	57.4	23.7	20.7	6.5	21.1	47.3	34.4	34.2	31.3	-18.8	32.1	-7.7	6.5	10.6	12.6	25.4	39.9	9.5	59.3	23.9	25	17.4	33.6	17.1	-19.7	-3.6	2.3	61.3	71	37.5	47.2	1.9	62.5	45.5	4.9	39.4	54.6	20.5	15.8	49.9	-4.8	27.5	22.3
1369	846.7	561.5	488	424.1	557.7	684.9	480.5	728.1	465.5	438.6	1169.7	419.4	418.4	511.8	319.3	1003.5	544	494.5	609.6	664.9	477.5	423.3	331.8	464.7	522.9	477.8	614.8	549.3	1137.5	647.5	382.3	939.8	370.2	449.5	252	598.8	462.1	460.9	361.5	334.6	469.4	1322.5	350.7	498.5	228.2	553.3	402.4	499.6	487.7
1370	2538.7	2070.1	2965.9	2439.3	1746.2	2248.6	1952.7	2146.9	5077.6	4357.1	3705.8	4411	2174.6	2175.8	1794.4	5704.2	6109.1	1235.4	2000.3	2797.7	2576.5	2025.9	2516.9	1608.3	6809.5	3905.6	1924.6	2766.1	1317.9	3768	2318.7	2065.5	1336.4	1456	5408.6	2237.8	2629.2	3569.5	3064.1	2857.6	3603.1	1836.6	1672.1	2337.4	7926.7	1326.1	4795.6	3464.7	900.5
1371	-5.2	35	2.1	2.6	5.8	-2.6	-0.1	6.9	8.4	-12.3	14.6	-9	23.5	-7.7	-2.5	-3	12.6	3.1	-4.9	1.2	-4.4	10.3	-1	1.7	35.3	53.4	-6.7	15	-64.3	74.3	14.4	8.1	-7.8	-14.4	31	3.8	17.3	15.2	19.5	-14.4	-9.5	2.6	-15.5	9.9	-19.4	21.9	5.7	-0.4	4.8
1372	282.5	335.6	328.7	440.6	107	578.6	496.3	324.4	323.8	552.9	1195.7	297.2	267.9	450.8	307.2	404.2	997.5	402.7	358.6	223.8	334.5	330.7	219	375.2	380.7	293.4	513.2	420.6	274.9	316.4	555.3	433.1	235.7	349.7	433.8	302.7	280.9	650	739.3	376.8	465.9	377.7	200.1	354.6	474.9	1034.7	468	241.8	787.7
1373	1611.8	1310	1876.9	2011.5	-464.6	1755.7	1101.1	1476.1	4439.2	2085	1769.5	1327	701	2014.2	1068.4	3343.7	5503.6	3009.7	988.5	2758.5	816.2	1155.7	69.9	731.4	-532.3	4353.1	319.3	2706.1	215.8	1661.1	1091.4	1396.6	158.2	1130.6	1281.8	2113.9	1220.7	1138.8	2533.3	1600.5	2246.9	2951.1	38.6	1798.5	2172.7	3229.7	622.9	937.1	2485.7
1374	237.3	239.1	197.6	185.7	214.8	180.8	230.1	146.5	74.7	121.9	168.3	130.5	110.9	178.6	149	49.2	212.6	203.3	142.9	242.8	149.3	107.4	172.2	145.4	153.7	266.4	165.1	177.7	184.4	238.4	201.9	209	199.8	225.9	247.9	279.9	270.7	170.5	273.3	188.7	140.7	253.1	199.3	137	178.6	165.1	199.4	149.9	168.9
1375	-10.8	-10	13.6	13.1	2.3	4.2	-14.1	14.9	-13	-0.2	-3.3	22.6	-9.2	2.8	22.8	17.3	25.4	6.1	4.5	52.1	-1.3	5.4	0.9	2.6	-31.5	12.9	-4.6	0.1	26.2	80.9	16.7	22.1	24.7	16.5	20.1	-11.6	13.2	7.5	3.5	20.1	5.9	-30.9	-0.5	12.9	24.4	9	22.4	-2.3	4.8
1376	582.3	320.2	262.9	641.6	182.9	228.4	675.3	449.2	343.8	1244.6	298.2	1077.4	358	542.2	3093.6	530.6	876.2	253.9	210.8	1670.2	317.1	424.8	292.8	189.4	1361.5	343.5	285.4	296.5	546.7	383.7	376.8	403.3	1184.4	267.5	1053.4	283.9	617.5	367.2	704.3	834.5	371.2	385.8	305.8	317.7	792.1	641.8	968.9	370.1	472.2
1377	37.8	43.9	37.8	46	30.7	11.6	31.4	36.5	103.7	36.3	9.5	59.2	22	47.3	33.1	106.6	45.6	41.4	53.3	71.4	19.3	43.8	36.9	26.8	36.3	118	28.9	22.4	43.3	-15.3	46.6	28	40.3	18.5	16	81.3	46	56.2	66.6	46.9	75.9	26.8	41.2	65.8	33.8	119.2	93	0.1	34.9
1378	31.1	51.8	76.6	36.3	16.7	37.4	48.2	117	19.5	76.6	99.7	99.4	105	25.8	68.1	62.9	96	69.6	43.7	36.5	127.8	311.6	152.5	77.5	-10.6	8.6	28.2	112.8	111.5	51.9	64.7	38.8	58.1	55.8	-25	175.4	10.4	62.5	115.2	99.5	92.4	106.5	106.1	87	-17.1	86	71.6	126.5	102.6
1379	295.8	49.3	126.6	86.2	105.1	114.8	69.8	92.9	162.6	40.1	152.5	95.1	121.1	81	117.6	382.6	40	78	489	273	188.3	231.2	48.2	177.6	142.1	108.8	181.2	146.7	195.6	283.5	128.9	66.6	261.4	85.4	104.6	68	424.1	275.9	112.4	137.2	179.5	135.5	135.6	365.7	118.7	163.6	332.2	85	90
1380	249	304.5	271.4	179.7	-99	59.7	90.5	175.9	115.8	83.1	60.2	-28.7	252.2	113.5	239.6	28	190.9	191.1	280	76	153.8	148.2	140.9	119.2	259.5	180	194.7	58.2	-27.3	140.4	197.9	209	140.6	207.2	92.2	162.6	338.9	262.2	351	191.8	42.5	249.5	83.4	150.8	377.2	85.6	161.2	57.4	207.9
1381	111	115.7	184.6	85.7	218.7	218.6	120.9	130.5	147.8	82.5	232.6	158.6	262.2	231.1	148.5	179.2	193.1	107	439.4	136.3	259.8	230.7	129.5	224.3	127.9	234.9	187.1	259.3	149.5	218.4	234.9	144.4	198.9	156.7	370.9	133	118.6	98.7	304	115.5	265.7	161	195.3	258	112.9	199.6	224.8	146.9	124.6
1382	1399.7	195.3	221.6	271.9	217.3	376.1	491.5	623.1	1.5	342.3	472.5	391.2	211.5	312.9	356.6	99.7	301.5	517.4	137	274	358.7	249.7	679.5	315.5	230	31.8	405.3	356.6	529	495.9	562.4	347.1	535.1	269.1	346.4	540.1	168.7	495.9	459.8	248.8	224.5	148.9	508.2	136.6	496.6	299.3	395	511.2	381.4
1383	54.1	23.6	75.6	67.3	54.6	1.6	72.1	48.9	45.6	55.2	49.2	53.5	70.4	50.4	81.6	24.8	75.6	9	37.9	53.2	57.3	43.9	41.8	44.1	86.4	53.3	45	52.4	-21.8	74.8	24.7	42.7	97	87	168	43.9	23.7	107.4	33.9	-3.2	48.1	11.1	48.1	69.3	92.4	66	52.8	41.3	18.9
1384	13.7	22.5	43.2	41.2	18.4	36.8	7.6	16.3	17.9	13.5	21.7	8.7	34.7	20.7	40.8	32.5	14.1	46.8	56.4	68.6	-0.7	21.5	11	25.7	14.9	2.2	9.9	21.5	19.7	33.7	14.2	46.6	10.2	35.2	-1.6	37.9	60.4	42.8	57.6	40.7	94.2	-9.7	9.9	46.2	144.6	127.3	41.4	11.9	27.4
1385	26.9	0.2	9.5	5.7	11.6	7.5	34.9	0.7	10.2	17.8	15.6	-3.4	-1	7.1	5.9	17.9	25.7	0.3	13.8	6.6	-13	4.7	9.4	11.2	-4	42.2	-14.2	-4.1	7.7	38.8	7.9	5	43.9	-2.3	5.7	27	73.3	36.4	44.8	12.1	38.3	17.3	-18.2	20	10.7	23.3	38.2	13.9	7.2
1386	11.3	30	25.7	11.5	28.3	16.1	7.3	11.5	20.8	5.4	22.8	-1.9	19.6	25.7	32.5	3.8	17.4	15.6	20	11.3	15.7	18	22.5	13	36.8	52.9	16.5	24.4	40.9	-4.5	22.9	24.8	20.3	27.7	-13.8	9.7	45.5	5.6	21.4	30.7	12.1	39.2	47.4	17.6	31	13.9	5.3	22.1	4.6
1387	144.9	106.1	127.5	244.8	151.7	111.5	130.8	128	271.9	207	329.1	127.6	259.3	134.2	182.8	96.6	212.2	136.6	142.3	80.8	182.2	182.5	157.6	163.9	395.3	145.5	154.5	147.8	114.5	205.6	150.8	170.5	182	293.1	270.9	102.6	127.5	118.8	130	86.7	158.5	32.2	183.6	127.3	292.1	219.1	234.5	167.7	142.5
1388	42.9	37.2	35.4	35.8	42.5	15.5	44.9	8.4	18.2	12.4	42.5	23	41.1	30.7	44.2	8.9	32.6	15.6	24.1	22.6	36	0.1	33.2	24.8	65.6	23	36.7	24.8	23.7	-3	28.5	187.4	38.4	74.7	70.6	33.3	24.5	26.8	22.9	29.9	67.1	26	25.7	30	13.9	14.8	26.1	11.4	7.2
1389	228.1	113.4	87.3	101.2	74.2	74.4	152.3	89.2	114.5	72.5	117.4	118.6	132.5	121.3	122.9	85.9	160.9	125.7	130.8	91	45.2	44	126	87.4	165.3	248	104.6	75.8	155.7	145.7	108.1	114.3	168.7	121.9	257	139.8	168.7	164.5	140.7	181	142.8	133.1	107.6	117.7	136.5	101.5	178.1	86.7	107
1390	152.6	-2.2	79.7	146.3	150.8	108.3	198.8	144.3	84.9	108	415.1	169.5	135.4	148.1	90.7	189.3	63.6	121.8	123.3	143.8	88	59.8	88.4	99.5	133.1	95	109.2	120.8	168.8	233.4	180.4	135.5	174.4	120.5	143	133.5	186.3	165.3	148.9	238	116.6	73.1	133.9	134.7	94	176	226.6	142	115
1391	65.4	13.2	8.7	29.7	25.8	11.2	39.5	42.6	81.3	41.5	18.5	76.1	61.8	58.1	32.8	20.5	63.5	18.7	40.2	12.1	-4.1	16.6	15.4	24.9	-50.8	23	48.2	-7.7	73.4	49.2	68.6	63	52.3	91	211.8	68.9	128.4	74.1	84.1	295.6	50	58.2	63	40.8	20.6	54	154.5	27.9	47.6
1392	58.4	70.5	58.3	63.4	114.6	71.6	70.9	50.2	44.4	59.9	108.8	104.7	61	48.5	91	18	107.4	101.6	41.8	55.1	37.7	132.5	29.1	84.3	61.8	16.7	7.4	87.7	51	-64.2	-4.2	82.4	42	52.6	53.5	239.4	16.1	2.6	42.3	37.7	167.3	82.1	79.3	119.2	25.7	62.4	49.4	103.8	50.2
1393	93.7	23.2	140.9	22.7	45.6	33.5	65.2	30.5	48.7	25.5	42.1	48.3	32	34.1	48.7	8.9	73.7	48	91	53.4	24.1	42.5	31.2	33.2	69.2	227.1	54.3	38.1	15.5	83.2	39.7	62.8	52.2	78.8	114.9	97.7	71.2	83.9	95.6	86.3	107.3	35.5	72.6	60.5	78.8	55.5	91.4	64.3	40.1
1394	1679.7	2440.4	2980	2065.4	1311.5	3251	2512.9	2639.2	2965.5	2188.5	2808.8	1634.1	2404	2178.1	2827.1	4107.5	3358.7	1845.4	1963.4	2615.7	1078.5	1379.1	1251.6	1403.8	3600.7	6409.7	1302.7	3420.6	2012.8	3520.3	2498.3	1713.4	1565.4	2255.4	2424.8	1965.5	3474.3	2911	3479.9	3957.2	3229.4	3301.8	1693.6	3984.1	2357.5	7390.2	2534.6	968.5	2290.3
1395	6.3	28.3	66.8	3.4	20.4	19.1	40.1	29.6	1.2	10.4	37.6	18.8	53.5	37.1	25.2	17.8	8	22.4	34.2	7	69.5	60.9	26.2	38.6	22.2	98.5	14.1	83.7	6.5	-14.5	133.2	24.8	4.6	43.1	38.3	43.9	10.2	21.1	21.9	22.7	98.9	83.2	83.4	42	19.4	55	23.1	67.7	40.7
1396	-54.7	-8.2	-2.9	-9.3	-46.4	-9.4	-31.2	-18	-63.8	-55.6	-5.9	-49.8	-13.2	-17.9	-4	-37.8	-55.2	-28.7	-13.2	2.4	-44	-10.2	-31	-18.6	-48	-25.1	-20.5	-5.9	-35	-119.3	-5.6	-15.5	-150.3	-35.7	-214.9	-14.3	-26.7	-24.9	-2.1	-31.5	-28.4	-112.6	-93.1	-19.3	-7	-55	-71	-43.3	-39.8
1397	1132.5	233.1	123.4	2303.8	1604.2	799.8	2313.3	1708.4	86.1	825.8	572.4	1249.5	221.7	1578.2	268.6	103	77.8	260.3	767.1	1185.9	1030.8	339	2377.5	266.9	256.1	352.2	1283	579.5	679.2	872	1055.6	1724.2	567.6	345.8	361.5	861.9	1777.4	1066.8	171.3	1045	167.5	233.4	3090.6	265.5	217.9	1088.1	303.7	1171.6	2111.4
1398	-17.9	43.6	19.6	35.5	29.2	18.8	2.3	20.8	4	9.5	3.2	21.5	12.9	11.2	12.9	12.3	21.5	43.2	15.9	12.6	40.2	14.3	15.7	14.4	13.9	37.6	30	17.3	39.2	-21	7	17.7	5.9	57.1	2.1	35.3	-2	17.2	43.8	20.9	43.8	30	26.7	32.1	32.4	35.1	39.5	18.9	21.2
1399	362.5	1046.1	695.1	593.3	311.9	552.1	914.6	626.8	171	699.2	431.1	633.5	504	239	518.3	278.2	140.9	1683	501.8	722.8	457.1	413.6	612.1	594.1	356.2	635.7	503.2	657.5	613.7	625.5	391	1000.9	995.7	378.3	224.8	581.4	691.3	494.8	165.3	395.2	285.9	671.2	582.7	240.1	177.6	783.4	515	336	868.4
1400	134.7	22.8	81.3	218.2	33.9	51.7	-26.2	124.7	44.7	62.2	241.6	74.9	200.7	344.2	105.7	461.1	169.2	150.5	262.1	87.4	215.3	69.4	67.4	132.1	-73.8	204.7	69.7	174.5	91.9	210.7	124.6	120.5	111.5	170.2	-59.5	40.5	133.4	77.9	251.4	240.8	75.3	384.6	89.4	304.6	76	469.2	124.5	161.5	58.8
1401	-141.2	-144.2	-99.7	-47	-141.7	-114.8	-79.7	-98.2	-7.9	-125.3	-146.7	-159.6	-64.7	-66.5	-84.1	-71.2	-130.1	-70.3	-113.1	-82.3	-125.5	-42.9	-19.8	-44.4	-110	-259.4	-79.2	-117.4	-119.3	-203.8	-51.6	-98.8	-100.2	-139.1	-327.7	-120.9	-270.6	-170.5	-172.8	-5.6	-225	-47.5	-137.8	-64.4	-60.8	-157.2	-109.9	-154.4	-71.5
1402	89	96.1	36.5	46.4	-71.4	128.3	-159.3	63	78.8	49.7	131.9	60.3	-14.1	89.1	45	154.2	199.3	25.8	84.4	79.7	78.6	119.3	-12	86	51.7	126.8	81	24.2	-57.3	-83.3	-87.2	89.6	14.5	-126.9	-216.2	56.6	-275	92.6	129	-62.6	109.8	-48.3	-66	35.3	9.5	45	23.1	79.9	40.2
1403	337.7	1021.4	578.1	340.7	862.3	639.8	261.7	364.3	692.2	284.2	324.5	391.8	804.5	601	468.1	279.2	1022.6	534.5	666.9	702	519.7	549.4	352.1	558.8	1349.7	533.3	295.9	580.5	508.4	644.4	366.3	397.4	391.7	426.3	653.8	1383.8	620.1	1026.3	1755.9	696.3	960.5	1432.1	338.6	960.6	696.3	686.4	1426.8	383.6	327
1404	-20.3	-33.1	74.5	80.4	37.4	52.6	21.7	44.7	22.6	-1.2	19.6	13.8	54.9	23.3	20.4	-1.7	0.3	45.8	26.2	38.3	55.5	11.1	54	18.2	25.9	22.7	2.2	56.4	69.7	88.3	19.7	53.5	17.6	42.1	74.9	50.8	51.2	67.2	80.8	64.4	70.8	76.7	60.8	43.8	98	54.8	71.3	33.2	21.2
1405	-362.7	-114.1	-118.3	-32.7	-117.2	-91.9	-69.5	-97.4	-82.6	-15.3	-39.3	-79.3	-63.3	-114.1	-130.5	-81.6	-73.9	-62.1	-79.4	-39.5	-74.4	-36.8	-110.4	-86.9	-154	-217.8	-34.1	-182.5	-85.2	-399.5	52.6	-173.4	-91.8	-83.7	-134.1	-37.3	-100.4	-133	-243.9	-81.2	-118.8	-133.1	71.3	-63.8	-97	-56	-103.1	-95.2	-76.5
1406	31.4	153.3	153.8	99.5	373.1	478	80.8	313.9	375.5	309.2	236.3	303.3	170.4	165.5	164.5	81.5	223.6	220.5	172.4	211.9	42.8	112.5	425.3	110.5	429.7	303.8	199.3	502.7	152.3	431.7	216.8	163.6	91.1	94.7	442.9	257.1	278	335.5	219.7	306.9	75.6	506.9	458	237	170.9	179	156.9	465.6	308.7
1407	285	297.6	200.3	202.2	205.5	207.1	261	175.1	269.7	144.9	303.6	229.1	219.4	216.2	183	137.9	264.1	127	137.6	155.2	200.4	189.6	227.3	231.8	283.4	300.2	277	265.5	362.3	316.1	184.8	194.9	194.4	300.2	411.8	165.3	315.3	288.6	250.8	250.8	238.4	259.4	306.7	216.8	213.5	263	159.9	234.1	232.5
1408	-3.9	75.9	45.1	22	30.6	-10.5	0.3	24.8	20.4	-23.6	10.6	-14.9	10.9	47.3	18	-3.7	20.5	-15.8	22.6	17.1	2.3	44.8	26.8	54.1	52.8	70.1	29.8	50.2	107.6	115.2	29.5	16.1	-10.8	33.6	11	12.5	64.9	83.8	52.1	40.8	12.4	26.9	21.7	48.5	48.7	45.1	31.8	41.7	49.5
1409	741.1	292	202.5	203.9	447.3	147.1	183.3	160.9	-15.9	813.7	232.2	370.9	335.5	361.5	377.6	47.1	275.5	288.2	376.5	243.5	320.6	441.9	421	413.4	49.3	359	576.6	230.4	524.5	575.3	604.9	207.7	977.3	347.9	297	329.6	337.6	-18	359.3	355.4	70	231.7	507.2	100.1	123.6	313	465.1	409.4	427.7
1410	-8.1	-10.5	17.2	7.3	0.5	-9.2	13.9	19.7	-10	19.9	34.7	3.4	16.2	14.3	4.5	0.2	28.4	3.7	7.1	5.5	3.4	10.6	-3.7	8.8	2.2	-30.5	22.9	28	31.7	13.1	27.9	8	-1.9	2.9	25.2	11	22.4	0.4	16.4	9.5	17.2	16	-1	7	-3.6	18.7	-6	34.4	12.6
1411	-3.6	55.5	7	62.7	-10.5	-4.4	-28.3	25.9	50.2	29	-16.5	-17.5	17.9	37.4	30	-3.1	44.6	-23.2	11	2.6	78.3	23.4	9.7	56.2	27.7	52.2	25	11.8	10.4	-33.4	-21.2	47.3	16.9	-9.1	19.3	44.3	-50	19.5	-6.3	-38.1	42.9	-13.3	52.3	38.7	22.5	-4.9	30.5	-1.9	17
1412	-26.2	-26.8	117	-26.1	-45.5	-13.2	-46.5	-14.9	-10.8	5.5	-10.1	5.7	119.6	-15.3	-21.2	5.7	487.3	7.5	-31.8	-2.8	32.1	-6.8	-37.1	-15.8	-2.1	64.2	-21.1	11	-41.8	-24.1	-33.2	-21.5	18.6	5.1	30.7	-24.7	-28.5	-43	414.9	-3.9	-1.1	-4	-39	844.3	-28.1	-11.9	-1.9	13.2	-6.1
1413	16.4	-10.9	78.5	15.2	-46.2	15.5	101	17.8	5.4	67.7	4.3	-11.8	11	19.9	43.5	-3.5	19.9	21.6	13.1	15.8	60.7	23.4	41.2	1.6	85.8	15.6	55.4	1.4	59	-8.4	90.8	0.7	58.2	114.8	34.7	7.7	123.5	21	60.9	52.5	44.2	34.8	82.3	-6.4	13.6	1.9	17.3	24.7	6.1
1414	-294.4	-220.3	-210.9	-132.9	-214.5	-212.2	-544.1	-156.4	-230	-120.8	-49.3	-328.5	-142.7	-306.3	-130	-180.3	-114.3	-51.8	-141.3	-70.8	-187.9	-185.8	-176.1	-230.9	-518.3	-415.6	-270.4	-142.9	-553.6	-616.1	-150.8	-271.8	-379.3	-169.9	-584.6	-43.5	-693.5	-222.4	-283.9	-339.6	-73.2	-432.3	-243.5	-252.3	-155.4	-438	-122.9	-206.9	-45
1415	220.9	123.3	-6.9	110.7	-68.4	41.3	201.3	17.7	18.6	46.9	158.9	29	85.2	63.7	66.6	16.3	149.6	50.6	56	6.8	157.2	-11.5	136.6	59.6	-34.9	-31.5	101.8	48.2	68.4	-35.6	-35.9	44.1	157.9	83.6	24.5	55.5	-68.1	-62.4	-2.5	-57.7	174	-32.5	37.9	122.3	-51	26.4	36.2	81.3	30
1416	23.7	126.8	1.8	13.8	12.9	19.2	-15.8	30.1	5.9	0.8	3	16	10.2	4.2	-23.8	7.6	14.1	69.6	10.2	7.3	53.3	21.6	64.4	14.3	108	56.6	9.3	21.4	1.6	-136.2	8.3	28.9	5.2	13.7	-44.5	106.3	46.4	16.9	70	27.5	19.8	-12.4	46.4	23.7	-0.3	66.2	10	2.9	5.2
1417	250.4	353.4	316.3	260.1	-15.4	277	263.3	277.8	251.9	165.5	335.1	325.1	300.3	222.9	254.2	93.7	299.3	355.1	251.5	170.8	165.5	231.6	253.8	221.7	485.3	182.9	237.3	137	213.3	270.3	30.6	258.8	18.6	106.1	108	162.1	16	173.6	77.6	391.2	305.8	268.4	29.5	204.3	267.3	275.3	357.4	337.3	274.9
1418	-431.9	-248.8	-209.1	-234.7	-384.1	-254.4	-407.7	-145.5	-328.8	-159.5	-232.1	-261	-235.8	-258	-221.3	-169.2	-237.2	-148.1	-134.7	-119.2	-295.2	-143.9	-218.9	-159.3	-564.8	-446.4	-212.1	-265.6	-529.9	-704.6	-250.9	-317.1	-271.6	-391.1	-662.4	-215.9	-382.6	-193	-392.5	-284.4	-315.9	-444.9	-390	-167.7	-252.8	-250	-184.6	-304.9	-155.8
1419	327.2	327.1	260.8	170.2	341.4	269.5	146.6	129.2	373	233	268.8	118.5	192.5	138.5	286.6	211.7	347.5	185.5	182.6	206.5	196	256.6	252	221.4	289.6	366.6	191.3	197.2	156	232.2	162.8	186.9	237.5	218.8	237.4	574.5	414	240	234.1	282.8	211.9	199.4	78.2	176.7	233.6	243.5	260.2	-14.2	126.7
1420	71.9	130.5	377.9	394.7	274.4	251	142.7	230	629.2	50.7	75.5	86.7	266.1	338	238	514.2	80.2	186.4	147.9	381.2	142.4	138.1	191.3	190.6	262.2	348.5	93.9	259.2	109.6	480.9	149.7	205	151.4	289.4	217.9	371.2	441.8	195	418.4	363.8	382.1	285.1	181.4	247.5	368.7	265.8	429.4	83.8	178.7
1421	867	1093.2	1035.8	766.7	1394.4	772.4	755.4	711.8	738.1	994.2	790.8	691.1	1136.8	966.3	861.5	1260	987.6	926.6	776.8	1377.3	1051.8	933.5	586.2	859.7	1032.8	1653.7	798.2	1115.6	670.7	744.8	941	1152.3	1040.8	829.5	982.2	1022.5	1084	531.5	1002.3	1073.8	908.4	2037.3	650.8	929.2	1084.9	1241.6	1408.4	539.6	952.1
1422	572.6	296.7	712.4	390.6	246.6	585.4	264	378.5	445	431.7	391.3	463.7	301.2	580.4	328.7	746.7	404.8	470	325.7	146.2	479.4	399.3	211.6	435	391.4	539.4	534	497.9	325.1	700.6	417.4	498.7	363.1	286.3	326.4	237.7	376.1	178.3	322.2	499.9	96.7	336	247.5	659.5	406.3	663.1	290.2	289.4	446.6
1423	525.7	793.7	717.9	586.6	473.1	510.5	459.7	702.9	653.2	579.4	714.9	685.3	569.8	472	660.6	870	837.8	767.5	704.8	868.7	493.8	357.4	770.8	436.6	32	783.4	423.5	518.4	441.7	469.4	475	685.5	456.2	727.1	141.9	884.7	909.8	432.3	859.2	720.6	646.2	740.8	543.7	573.7	728.1	590.1	677.1	727.8	556.8
1424	27.9	2.8	54.8	42	40.3	31.6	31.9	24.6	34.4	23.1	28.4	-4.9	40.7	9.7	54.7	26.8	40.5	11.5	2.6	10.8	11.1	19.4	22	8.9	4.1	30.5	29.8	65	-9	31.2	25.8	40.5	66.6	-2.7	56.6	23.9	17	49.6	36.5	15.2	14.6	32	69.8	25.3	12.2	17.5	40.3	-3.5	2.1
1425	-115.4	-60.6	-73.9	-53.4	-149.2	-16.8	75	-12	-82.4	-19.2	-32	-36.2	5.4	-27.7	-52.7	-64.2	-49	-53.8	-58.2	-61	-41.4	-19.2	9.2	-42.9	-181.7	-131.5	-13.8	-75.3	-84	-180	-176.6	-43.6	-37.7	-168.2	-306.8	-99.1	-366	-92.2	-129.9	-244.9	-48.7	-117.3	-78.1	-28.8	-43.1	-187.4	-75.7	-127.6	-25.4
1426	31.6	54	18.2	22.3	17.7	4.1	26.7	5.8	33.6	11.3	12.2	7.4	5	17.9	30.6	1.4	11.6	12.5	6.4	13.2	15.7	19	23.1	20.3	-15.1	-6.9	7.3	2.2	22.7	-12.9	13.1	1.1	6.6	11.5	23	3.3	-25.4	12.8	43.8	-11.3	27.4	-8.9	52.9	1.2	48	21.1	12.2	14.7	17.1
1427	237	114	98.7	4.9	-98.8	-9	-219.1	23.2	188.6	42.7	171.6	137.2	21.1	65.1	-45.9	53.8	146.9	14.4	15.9	-18	66.6	22.5	59.3	91	-102.7	52.8	49.5	-21	-13.9	-65.1	-97.9	-45	-54.7	-19.2	-189.4	23.7	-18.8	-14.2	50.9	34.5	-69.3	3.2	-89	78	-72.7	89	37.2	-89	25.5
1428	45.3	31.6	433.7	108.8	339.2	67.5	378.6	211.3	259.2	242.6	-7	89.3	156.4	86.5	634	410.3	-7.1	186.8	90.7	199.2	77.7	485.2	40.1	84.6	299.5	22.1	46.4	207.4	152.3	340.2	52.2	158.9	24.6	705.4	186.3	782.6	103.1	177.2	94.4	70.4	1159.1	182.7	131.4	46.4	931.1	39.2	151.9	17.2	0.7
1429	10.1	69.9	52.8	18.3	34.8	49.5	53.2	30.2	149.5	33.4	11.2	2.1	46.3	41	59.4	40.3	46.6	19	54.7	48.8	14.6	40.9	18.9	60.1	25.7	-0.1	35.1	70.6	54.7	68.6	71	16.9	-3.2	14.5	186.1	23	12.4	45.2	69.1	35.9	-9.8	57.2	72	40.9	112.7	40.2	2.1	60.4	-3.7
1430	98	328.6	264.7	274.5	358	112.1	83.7	96.2	142.2	126.2	109.7	107.1	189.5	268.5	481.3	162.2	219.3	293	127.3	139.2	113.1	166	240	124.5	241.6	352.9	47.3	55.6	110.7	187.5	82.2	471.4	98.8	149.3	385	406.4	121	175.3	136.7	71.4	426.1	84.4	130.7	143.2	116.2	190.2	153.7	83.8	40.8
1431	-64.4	-55.4	-61.8	-39.1	-59.9	-106.5	-50.1	-56.1	-117.7	-56.5	-88.3	-107.5	-62.6	-69.4	-88.4	-57.6	-125.2	-73.3	-27.4	-55.8	-76.1	-31.1	-79.5	-64.3	-140.2	-55.2	-40.8	-101.7	-137	-139.4	-37.2	-63	-50.1	-209.4	-97.1	-93.9	-167.1	-103.2	-158.5	-100.8	-129.8	-165.6	-80.4	-50.4	-86.8	-123.9	-51.4	-84	-66.6
1432	27.9	25.7	19.7	-28.3	11.7	29.6	-21.2	-12.1	-30.5	29.9	5.6	24	-15.7	11	-16.7	-24.6	-52.6	-31.9	-21.7	-3.1	-5.9	9	12.6	4.3	-47.7	19	-0.4	9.4	66	-4	-3	-3.3	-13.1	23.8	-30.7	-33.5	-2.7	17.2	27.1	9.9	-54.5	60.3	-21.5	-37.2	-36.6	-53.9	-76.7	14.3	-13.4
1433	2868.7	2343.6	2951.2	2243.8	2226.8	1859.4	2032.2	2806.3	1885.3	1372.7	2074.8	1738.1	2134	1769.9	2888.7	3080.9	2234.8	1865.9	1385.4	2061.4	1197.1	1687.4	1475.8	1834.6	2497.8	3182.3	1402.9	2030.8	1539.2	2486.8	2561.2	2180.2	1677.3	1695.9	1958.4	2048.5	1282.4	2432.7	2703.6	3007.8	2304.1	1335.2	2029.5	2579	5133.9	1551.3	2866	1454.9	1903.7
1434	46.9	3.4	31.9	80.1	51.6	14.7	23.1	22.3	69.1	28.7	23.2	5.3	52.5	41.7	61.8	23	55.5	24.6	41.3	19.2	67.7	51.2	11.5	56.3	7.3	2.6	57	58.6	49	137.4	32.6	100	47.2	63.2	58.4	24.8	117.6	64.4	40	44.5	7.5	6.6	46.2	45.8	31.2	10.5	31.8	14.9	27.9
1435	-191.5	-47.3	-221.9	-303.5	-398.3	-247.3	-438.7	-164.3	-415.8	-164.5	-115.6	-182.8	-167.7	-178.9	-140.9	-91.4	9.4	-192.9	-128.4	-82.8	-296.3	-108.6	-299.1	-75	60.5	-275.1	-197	-289.5	-330	-628.4	-168.4	-328.4	-230.1	-468.9	-706.2	-289.2	-392.6	-228.6	-399.3	-333.6	-281.1	-445.3	-428.8	-92.7	-262.8	-251.8	-137.5	-264.7	-76.4
1436	94.2	68.8	97.5	232.2	210.4	155.6	39.8	77.4	-8.4	31	76.7	83.8	160	126.5	105.6	40.5	55.4	185.6	191.4	88.1	188.7	146.1	271.7	186.7	418.3	215.4	101.8	146.7	149.2	32.3	215.5	60.1	101.2	87.6	-19.2	199.2	-23.9	96.6	170.3	263.5	60.1	257.8	82.9	116.1	200.7	10	161.7	105.8	206.9
1437	16.6	14.9	11.2	16.9	23.7	12.9	11.3	7.7	9.1	4.6	32.3	17.6	22.9	17.1	0.1	7.9	13.2	16.8	20.2	4.2	15.1	16.8	14.1	7.4	1.5	6.6	24.8	7.2	-8.7	45.4	-9	-0.1	12.1	-4.7	51	17.7	8.2	19.2	-10.7	11	21.7	9.2	0.3	15.2	19.2	-15.1	7.7	12.5	11.7
1438	-1.9	17.3	-14.9	14.3	498.6	199.9	-14.2	153.1	106.9	18.2	-5.6	30.3	1	103	-4.5	23.5	-35.8	-23.8	13	341.2	65.2	58.3	92.8	54.9	-28.1	10.2	157.9	89.6	151.4	-41.4	93.3	44.5	-21.9	20.3	-51.2	-28.2	-22.9	7.8	7.2	-19.6	-16.5	223.1	320.7	-8.9	-37	-4.5	-12.2	217.5	91.3
1439	3.6	-21.6	2.8	-9.4	-7.8	-11.3	4.8	-6.3	49.8	12	30.9	26.7	-17.2	-14.6	34.8	0	-1.5	1.8	15.1	0.2	0.6	2	-4.1	5.4	-18	-24	-13	21.7	3.2	-25.7	-14.8	-8.4	-24.3	-13.7	37.4	5.2	71.3	-13.2	18.8	6.1	-10.8	-6	-0.1	13.6	-15	-9.1	8	26.1	10
1440	-116.7	84.7	37.8	-28.5	-107.6	73.6	-215.1	100.8	124.4	-126.9	15.9	-85.4	-36.9	42.5	-73.5	-8.4	-91.5	-6.6	-126.7	-49	42	4.2	117.9	76.7	42.7	-9.6	112.3	170.6	-0.5	-252.5	15	62.3	171.4	-259.6	-538.1	-51.6	127.2	-131	-393.5	180.3	-113.7	-42.2	-103.3	138.1	179.7	113.6	11.8	-52.4	-16.4
1441	149.4	214.9	232.5	150.1	220	70.2	83.5	100.2	107	65	72.4	67.4	128.6	87.8	168.1	53	60.9	208.1	61.4	228.3	106.1	131.9	159.2	148.7	78.3	105.1	145.2	77.6	108.4	94.1	147.6	206.7	77.5	150	127.3	158.8	75.5	136.6	119.5	80.8	158.9	77.8	170.7	216.1	200.5	68.3	109.9	112.9	105.5
1442	177.9	-54.7	-20.4	-12.3	-182.4	-37.1	49.3	49.1	-39.5	58.2	125.8	71.4	-31.4	25.5	-19.4	-42.5	-51.7	10.3	-8.3	17.5	-9.6	45.6	29.7	13.2	-51.1	-63.7	-14.6	-61	-69.9	-282.8	-96.9	-45.9	15.7	-30.4	-304.9	-47.5	-80.8	-30.7	-9.8	-12.4	-16.1	-14.6	-21	-101.4	-47.7	-18.1	41	53.2	-40.3
1443	43.7	73.5	14.3	71.4	15.1	72.9	114.1	13.1	2.5	21.3	8.2	83.3	323.5	215.8	219	59	9.3	33.8	156	-0.8	216.4	73.3	128	317.1	25.4	-26	362.9	85.9	91.9	172.2	2.2	250.8	75.3	87.7	4.4	10.3	26.8	19	31.2	78.6	14.9	13.9	54.4	227.7	42.2	105	12	100.4	85.8
1444	41.1	43.1	7.3	11.7	26.3	32.1	71.9	17.5	26.3	15.9	-4.5	-14.1	18.7	22.4	20.8	-2.7	8.3	-2.2	-5.6	7.6	52.8	13.9	11	28.2	70.1	31.4	40.1	40.3	-39.4	85.2	16.6	15.9	69.4	33.9	118.4	34.5	41.2	36.9	1.3	24.2	24.4	72.6	40.1	14.3	-10.8	47.1	17.7	6	-9.5
1445	222.3	267.8	286	196.8	156	172.8	291.6	237.7	463.8	162.2	322.8	218.6	174.7	249.4	184.8	371.8	423.5	331.9	182.2	206.2	156.7	150.3	124.4	207.2	361	267.7	129.8	136.6	187.5	272.2	158.5	263.3	144.5	136.3	308.4	521.1	249.8	275.1	436.9	270.1	1658.2	190.1	98.2	255	127.4	453.7	347.5	148.7	178.1
1446	164.7	359.4	502.9	102.9	71.5	34.6	157.5	166.2	287.8	116.5	140.1	76.2	173.5	63.2	345.9	97.8	106.9	247.1	112.2	83.2	170.6	139.3	116.5	176.2	-33.9	188	107.3	180.4	44.8	44.5	122.9	204	71.3	226	123.2	372.6	108.4	8.6	56.8	42.2	221.3	93.7	159.1	173.9	277.3	89.8	276.7	154.1	160.7
1447	308.5	195.5	180.7	318.4	578.9	402.2	1119	204.9	347.7	135.8	212.6	114.9	295	548.1	326.2	92.1	283	158.2	51.4	59.7	338.3	228.7	214.4	143	-13.3	272.8	193.3	198.3	794.3	573	655.4	576.5	425.6	513.3	601.7	159.4	508.1	287.9	357.3	283.8	164.6	416.6	624.2	309	63.5	334.1	174.7	293	188.1
1448	320.5	238.7	455.7	384.7	262.7	337.4	491.4	159.8	223.6	193.9	233.4	151.4	301.9	373.1	506.1	263.9	392.1	232.8	194.8	460.2	300.2	393.9	211.4	238.3	300.8	132	256.6	297.8	329.1	316.5	316.8	458.7	274.7	361.7	468.3	532.6	359	321.6	354.5	264.5	444.8	246.7	322.4	237.6	497.1	391.8	278	196.1	266.4
1449	-150.3	18.4	-62.7	-50.4	-25.4	-69.7	13.5	15.8	-24.2	-93.2	-56.8	-83.3	-1.5	-79.3	10.9	-5.4	-19.7	-23.6	-39.4	-39.1	-8.8	-20.1	-39	-4.8	-33.3	2.9	-92.1	-14.6	-83.2	-105.3	-54.6	8.8	-65	-34	-157.9	-17.5	58.6	-12.9	1.8	-75.1	-21.3	33.7	-55.3	-3.3	-45.2	-34.9	-21.4	-35.1	-45
1450	32.5	64.1	36.9	12.7	-39.5	35.6	-7.2	34.9	2	19.2	-5.1	-52.4	33.9	34.7	54.4	-0.8	78.8	7	-36.8	33.7	-10.5	36.1	18.6	51.6	22.2	-34.2	2	-72.7	10.3	12.5	66.7	5.3	0.9	-30.9	-19.7	-10.5	5	56	56.3	-54.3	48.4	-141.3	21.1	8.7	23.9	-35.2	-48.9	-51	-9.2
1451	121.2	123.1	43.1	36	31.1	95.1	106.6	23.2	64.5	33.2	9.5	10.9	24.9	78.1	31.7	59.5	36.9	12.7	22.5	19	50.3	75.3	67	40.4	67.4	107.9	56.1	66.3	99.8	132.8	42.1	63.8	51.7	37.9	21.5	32.6	87.6	5.3	7.1	18.4	47.2	40	-18.5	35.9	42.9	77	76.5	23.5	28.9
1452	80.8	94.6	98.5	51.4	77.3	112.8	104.2	97.5	206.4	55.5	118.9	82.2	128	169.8	114.7	209.5	47.9	77.9	67.2	106.6	105.3	61.7	92.3	83.3	94	349.7	99.5	117.6	62.8	172.4	94.9	113.3	109.9	103.9	128.3	102.2	100.6	91	181.4	73.6	83.2	171.4	86.4	126	99.9	100.7	109.2	80.5	42.6
1453	3948.2	640.1	893.8	2061.6	2458.3	1927.2	3487.2	3800	1670.9	2081	1015.4	2095.8	971.5	1634.2	2800.8	3537.3	825.3	2006.7	3068	2615	1957	2400.1	3473.1	1442	1192.4	431.7	2915.8	1382	3530.9	1799.7	2286	2330.3	6148.8	2185.3	5170.9	1780.4	10341	1625.5	360.2	3596	2059.2	3128.3	3013.2	995.2	1223.5	1573.6	1943.3	2300.1	1788.6
1454	-519.8	-285.4	-406.6	-425.6	-326.4	-254.5	-847.9	-236.4	-320.5	-326.1	-378.4	-416.6	-307.1	-374.7	-310	-56.8	-466.8	-248.8	-223.9	-163.4	-416.2	-223.5	-437.9	-230.5	-520	-281.6	-445.3	-512.8	-546.8	-668.8	-584	-504.6	-491.5	-875.5	-1143.9	-215.3	-392.1	-351.6	-460.9	-90.1	-404.4	-433.6	-378.7	-205.5	-310.9	-317.4	-137.9	-486.6	-147.4
1455	-14.8	263.6	160.8	265.1	155.5	170	205.2	45.7	236.2	217.2	283.9	180.7	201.9	172.8	181.2	65.1	284.8	110.2	91	230.8	133.7	149.2	96.9	210.5	90	274.8	227.3	116.4	85.4	197.3	113.6	163.5	89.7	196.9	246.9	120.8	1.4	130.8	295.9	-2.9	213.8	158.7	78.7	154.5	278.7	166.8	197	100.9	127.6
1456	239.2	385.4	375.3	246.9	158.9	325.8	307	196	107	236.3	191.1	182.9	217.2	216.3	272.4	153.6	387	322.2	177.6	97.7	298.2	211.6	202.3	237.8	224.1	385	239.4	351.8	686.5	573.7	261.4	355.5	278.7	376.2	297.2	298.7	450.5	179.2	376.5	173.4	413.4	464.2	281.8	228.3	181.9	336.6	425.8	301.7	293.7
1457	-22.9	-53.2	-47.3	-86.6	-94.2	9.7	-34.2	-41.1	-71.7	-47.3	-16.5	-72.6	-34.1	-54.4	-51	-65.4	-35.5	-40.5	-56.9	-11.6	-73	-50.6	-67.5	-31.5	-84.3	-121	-57.6	-58.6	-92.1	-292.6	-62.8	-101.9	-120.6	-107.8	-144.8	-75.1	-65.6	-29.8	-38.3	-61.2	-50.6	-132.5	-116	-34.5	-26.8	-76.8	-62	-72.3	-9.8
1458	-121.9	56.3	21.6	20.4	35.2	23.6	-40.1	23.5	37.2	38.6	6.5	-6.3	36.7	27.7	-50.7	14.2	32.2	26.6	3	12.4	-58	-13.9	21.7	36.8	-51.6	41.4	57.6	28.5	-12.8	-86.3	-8.5	38.6	17.3	23.3	-54.2	38.5	-110.9	-2.5	-44.5	-44.4	32	-100.4	26.8	51.9	9.5	-55.3	66.8	21.5	-1.3
1459	1029.4	782.5	265.6	494.6	468	438.8	569.6	987.9	413.9	1610.4	421.4	968.8	429.5	355.4	240.3	241.7	503	540.5	517.4	1141.9	344.6	295.1	695.4	636.5	279.1	164.2	801.1	338	394.9	227.1	365.4	775.3	632.2	943.1	227.2	840	158.7	1154.2	491	174.6	643.8	454.8	767.6	56.9	263.1	473.6	647	1147.4	659.4
[truncated: 5,670 more rows]
[truncated: 11 more columns]
