# Supplementary material for: A Wrapper Feature Subset Selection Method Based on Randomized Search and Multilayer Structure
Source: Biomed Res Int. 2019 Nov 4;2019:9864213. doi: 10.1155/2019/9864213 (PMC6885241; doi:10.1155/2019/9864213)
Supplement: Supplementary Materials — Public datasets: details of five public datasets (had been described in Table 3 in the paper) which are the important datasets for classification with our methods and other comparative methods. Supplymentary Tables 1 and 2: description of two algorithms (LVW and Imp-LVW) which were compared with our method in Section 3.2. [file 9864213.f1.zip › 9864213.f1/public datasets/Leukemia.csv]

ID	1	1	1	1	1	1	1	1	1	1	1	1	1	1	1	1	1	1	1	1	1	1	1	1	1	1	1	1	1	1	1	1	1	1	1	1	1	1	1	1	1	1	1	1	1	1	1	2	2
1	-214	-139	-76	-135	-106	-138	-72	-413	5	-88	-165	-67	-92	-113	-107	-117	-476	-81	-44	17	-144	-247	-74	-120	-81	-112	-273	-342	-87	22	-243	-130	-256	-62	86	-146	-187	-56	-55	-59	-131	-154	-79	-76	-34	-95	-12	-20	7
2	-153	-73	-49	-114	-125	-85	-144	-260	-127	-105	-155	-93	-119	-147	-72	-219	-213	-150	-51	-229	-199	-90	-321	-263	-150	-233	-327	-200	-248	-153	-218	-177	-249	-23	-36	-74	-187	-43	-44	-114	-126	-136	-118	-98	-144	-118	-172	-207	-100
3	-58	-1	-307	265	-76	215	238	7	106	42	-71	84	-31	-118	-126	-50	-18	-119	100	79	-157	-168	-11	-114	-85	-78	-76	41	262	17	-163	-28	-410	-7	-141	170	312	43	12	23	-50	49	-30	-153	-17	59	12	-50	-57
4	88	283	309	12	168	71	55	-2	268	219	82	25	173	243	149	257	301	78	207	218	132	-24	-36	255	316	54	81	328	295	276	182	266	24	142	252	174	142	177	129	146	211	180	68	237	152	270	172	101	132
5	-295	-264	-376	-419	-230	-272	-399	-541	-210	-178	-163	-179	-233	-127	-205	-218	-403	-152	-146	-262	-151	-308	-317	-342	-418	-244	-439	-224	-226	-211	-289	-170	-535	-233	-201	-32	114	-116	-108	-171	-206	-257	-110	-215	-174	-229	-137	-369	-377
6	-558	-400	-650	-585	-284	-558	-551	-790	-535	-246	-430	-323	-227	-398	-284	-402	-394	-340	-221	-404	-347	-571	-499	-396	-461	-275	-616	-427	-493	-250	-268	-326	-810	-284	-384	-318	-148	-184	-301	-227	-287	-273	-264	-122	-289	-383	-205	-529	-478
7	199	-330	33	158	4	67	131	-275	0	328	100	-135	-49	-249	-166	228	-42	-36	83	326	-118	-170	-138	-412	-66	-479	419	-656	367	55	-285	-222	709	-167	-420	8	-184	-105	-222	-73	-34	141	-28	-68	361	172	358	14	-351
8	-176	-168	-367	-253	-122	-186	-179	-463	-174	-148	-109	-127	-62	-228	-185	-147	-144	-141	-198	-201	-24	-224	-119	-153	-184	-108	-251	-292	-452	-141	-172	-93	-316	-97	-197	-152	-133	-62	-133	-126	-114	-123	-61	-118	-89	-187	-104	-365	-290
9	252	101	206	49	70	87	126	70	24	177	56	-2	13	-37	1	65	98	96	34	6	126	124	115	184	164	136	165	137	194	0	52	10	27	-12	-60	-148	12	0	136	-6	62	52	40	6	87	185	-25	153	283
10	206	74	-215	31	252	193	-20	-169	506	183	350	-66	230	113	-23	67	173	-55	-20	469	-201	-117	-17	-162	-5	-86	350	-144	162	500	-134	159	14	-70	-468	17	97	-40	320	149	341	878	-217	208	104	157	147	29	247
11	-41	19	19	363	155	325	-115	361	284	-143	204	208	2	188	205	-101	-133	-209	11	-127	-89	-14	265	100	46	-190	-40	48	207	58	-140	-3	-69	-89	182	-100	-83	30	81	-62	-166	-51	-52	-25	-239	66	-221	255	146
12	-831	-743	-1135	-934	-471	-631	-1003	-1001	-829	-684	-524	-472	-425	-625	-437	-547	-959	-362	-535	-539	-429	-731	-600	-477	-470	-308	-1250	-591	-960	-517	-321	-643	-1014	-355	-322	-373	-375	-436	-518	-406	-309	-592	-247	-430	-436	-525	-297	-769	-752
13	-653	-239	-962	-577	-490	-625	-761	-520	-844	-468	-599	-163	-381	-413	-351	-277	-271	-427	-386	-95	-74	-546	-469	-498	-383	-497	-863	-622	-622	-24	-439	-502	-906	-173	-319	-139	-426	-171	-168	-354	-521	-219	-454	-348	-349	-401	-289	-615	-702
14	-462	-83	-232	-214	-184	-177	-541	-163	-230	-51	-188	-192	-2	-229	-210	-22	-228	-4	-64	-114	-63	-209	-235	-210	-225	-106	-125	-342	175	-99	-149	-129	-193	-165	-137	-234	-187	-176	-102	-133	-85	-149	-11	-79	-197	-162	-81	-199	-228
15	75	182	208	142	32	-94	109	-38	292	233	34	-80	62	0	39	196	-42	199	49	171	327	115	58	-71	85	80	270	294	171	13	-56	-31	331	-139	144	-103	23	-77	57	252	174	-76	187	8	521	30	155	232	48
16	381	164	432	271	213	222	435	281	172	310	221	89	243	175	67	306	232	290	13	99	96	111	81	217	83	246	312	241	-71	-77	117	247	303	144	-100	65	-34	49	105	198	161	391	154	73	274	337	195	222	180
17	-118	-141	84	-107	1	-1	-129	-137	-59	-79	-41	-106	-41	-99	-122	-68	100	1	-46	-102	61	-2	-64	52	-77	-7	-179	-7	-163	-182	-31	-100	-273	-111	-201	117	25	7	-61	-103	-93	-11	0	-119	67	-162	-91	-172	-141
18	-565	-423	-501	-101	-260	-140	-399	-247	-323	-443	-204	-251	-424	-142	-110	-362	-599	-350	-334	-541	-79	-264	-131	-145	-120	-194	-874	-108	-445	-150	-243	-498	-566	-161	-408	-94	-171	-70	-167	-336	-333	-190	-322	-87	-184	-213	-160	-287	-233
19	15091	11038	16692	15763	18128	34207	30801	25147	15272	21801	18167	27087	19324	14760	11631	16738	14030	23505	20225	6479	22143	24327	36417	14989	18343	12801	25673	45815	20958	25880	41275	11195	21777	28991	42401	27924	21229	29189	29906	20288	23462	19457	17499	24611	43084	49419	49084	16716	45492
20	7	37	183	45	-28	65	43	338	29	-36	-8	-5	21	35	50	-22	95	41	-42	22	2	48	60	92	71	-17	172	57	21	41	84	-20	182	67	9	-807	-774	14	10	-55	30	105	-5	27	57	84	76	-66	-26
21	311	134	378	268	118	154	80	269	188	-39	115	186	38	134	173	232	98	93	191	171	211	253	229	67	32	161	366	422	137	70	178	188	272	32	274	-355	-286	88	-12	74	114	241	135	70	62	10	35	172	67
22	-231	-161	-221	-27	-153	-49	-87	-116	-69	-142	-95	-18	-37	-33	-24	-156	-208	-147	-55	-129	-47	-73	-64	-52	-59	-76	-186	-185	-83	-12	-172	-75	-135	21	-26	-41	-54	-93	-111	-121	-57	-4	-170	-25	-22	-113	-78	-80	-72
23	21	-21	67	43	-8	-24	-8	46	74	10	14	-2	26	68	-10	-38	107	4	-29	-30	101	23	98	-32	23	4	67	-48	30	37	-14	-29	-12	-43	31	7	112	2	78	-58	13	43	11	23	19	82	94	18	7
24	-107	-180	-203	-52	-111	-72	-250	-317	-217	-130	-54	-150	-118	-95	-71	-134	-237	-81	-174	-205	11	-181	-93	208	-268	-27	-97	-181	81	-15	-271	-19	-270	-103	-93	-1700	-664	-137	-194	-72	2	-44	-144	0	-109	-208	-40	-182	-86
25	165	18	238	247	44	39	100	265	106	-1	91	79	153	71	37	139	84	76	-3	36	68	36	13	92	-113	100	6	-4	300	49	73	150	-44	26	115	-2658	-1383	-99	-52	74	113	171	123	61	67	97	38	169	76
26	-78	-120	-124	-116	-88	-104	-73	-130	-159	-18	-81	-57	-86	-41	-80	-119	-241	-67	-123	-109	-79	20	-112	-82	-55	-50	-93	-132	-76	-52	18	-119	-183	-86	-84	-207	-208	-127	-80	-51	-70	5	-101	-59	-67	0	-33	-66	-55
27	-204	-65	-161	-208	-102	-40	-132	-212	-155	-70	-134	-116	-76	-77	-46	-114	-144	-46	-99	-101	-79	-75	-56	-152	-106	-140	-215	-2	-234	-120	-2	-82	-206	-137	-228	-256	-178	33	-71	-156	-130	-99	-154	-138	-32	-2	-45	-243	-177
28	29	97	36	22	32	40	-57	-233	-101	-2	22	-45	22	-93	43	13	-29	-55	-18	61	8	149	-93	-59	63	-7	7	115	-49	-23	16	-63	109	-68	-12	103	431	171	-17	22	-61	-14	44	14	-32	-12	-10	-102	0
29	-61	15	-23	-10	5	46	-52	29	143	2	5	38	38	-13	-102	-63	22	1	-57	-5	31	-26	-49	-45	-10	-42	-37	41	24	-37	-23	-44	-88	-10	38	-59	-44	-69	-61	-56	-38	80	6	-21	-24	5	-91	-45	-79
30	-105	-49	-80	-74	-18	-78	-73	-28	-4	-9	-14	-79	-83	-31	10	-26	-91	19	-76	62	-24	-17	-75	-50	-83	-28	-61	-50	-52	-70	102	-24	-94	-29	-74	-90	-78	-33	-103	-55	-31	-49	-37	-19	4	-74	-38	-29	-125
31	-366	-330	-481	-240	-228	-273	-327	-599	-283	-264	-269	-165	-170	-237	-187	-339	-574	-267	-154	-192	-154	-145	-176	-146	-255	-247	-458	-202	-370	-254	18	-232	-510	-167	-377	-249	-262	-122	-179	-253	-193	-138	-265	-140	-247	-424	-175	-419	-281
32	-41	-41	-65	-33	53	-7	-28	73	47	71	42	15	17	53	2	39	76	-10	20	8	-36	-28	-26	32	-6	-123	-93	113	-35	51	8	31	-39	-62	21	-51	-53	-23	-12	5	-45	51	112	21	29	-5	25	-12	122
33	-346	-772	-620	-560	-348	-618	-613	-604	-383	-500	-509	-432	-505	-383	-395	-645	-732	-414	-736	-992	-328	-461	-341	-457	-607	-586	-580	-557	-616	-340	-462	-701	-3766	-262	-673	-3006	-2939	-238	-508	-570	-483	-490	-313	-512	-421	-787	-363	-686	-622
34	-297	-259	-269	-261	-169	-355	-317	-226	-196	-283	-233	-231	-251	-163	-192	-356	-283	-133	-391	-296	-158	-173	-212	-272	-220	-278	-215	-687	-409	-149	-212	-366	-403	-189	-353	-1899	-1534	-141	-199	-243	-223	-101	-181	-307	-117	-285	-277	-310	-307
35	-109	-192	-136	-366	-156	-344	-220	-229	-106	-230	-275	-321	-306	-317	-43	-304	-283	-130	-423	-273	-222	-227	-153	-199	-300	-280	-253	-289	-417	-153	-191	-413	-358	-158	-372	-1725	-1573	-137	-167	-170	-263	-117	-22	-170	-222	-375	-228	-293	-221
36	-13	-219	104	-148	-55	-327	-179	-163	-100	-109	-276	-224	-250	91	594	-221	-226	-23	-344	-97	-92	-95	-60	-168	-113	-113	-179	-195	-589	-124	52	-437	-257	-56	-312	-1694	-1365	134	-117	-108	-313	-1122	607	-32	-299	-206	-127	-66	-79
37	215	116	476	155	122	176	58	257	166	155	46	-17	202	185	776	114	265	78	126	448	73	-104	30	147	191	35	-62	135	96	194	203	54	85	14	-31	126	77	173	146	136	21	185	582	231	-59	56	86	182	45
38	797	433	1474	415	483	412	383	580	752	606	266	152	778	1490	1680	629	809	524	370	2822	404	153	594	659	753	495	503	267	373	532	1466	650	652	165	331	321	341	316	286	556	318	694	1512	961	137	654	160	378	372
39	14538	615	5669	4850	1284	4148	21573	3934	13005	-163	791	8299	-71	912	6800	-8	-96	832	-56	70	-103	16487	17655	-142	4958	29	7953	57	-175	-55	-18	1453	10309	104	307	223	-115	291	8378	-25	31	32	53	106	-199	0	-43	504	2171
40	9738	115	3272	2293	2731	2743	11031	1548	7272	-213	122	4204	-209	583	6946	-251	-397	933	-284	-233	-282	13380	17011	-346	2666	-148	4004	-238	-304	-341	-189	632	6028	53	-62	53	-238	44	4246	-143	-190	-104	-49	-38	-431	-357	-238	92	1752
41	8529	1518	3668	2569	316	2404	26002	1299	13939	-241	1553	5351	-316	1916	2740	-186	-382	273	-414	-364	-259	10071	5885	-386	4297	-337	2584	-337	-371	-313	-233	362	3806	-109	-182	254	12	327	6833	-154	-218	-49	0	-295	-416	-481	-434	114	904
42	15076	19448	27410	14920	14653	25771	11605	8184	19932	27919	25452	19281	11065	16323	17426	10815	16575	19482	12502	12701	188	13831	16743	11329	19430	6480	9805	6339	10756	15439	7760	14640	10093	10171	12489	20411	16760	19690	11777	6332	7661	21537	22417	11170	12594	8770	9860	17664	10695
43	11126	13568	16756	11439	15030	24420	12125	4175	15546	18782	17041	20863	10630	11676	14110	13017	13007	16429	14131	10592	-74	11270	19434	10299	15970	8380	7327	5199	10207	14345	9582	10675	10127	17294	16066	21334	14799	19406	13011	5905	8189	15601	13884	13624	14427	7956	12353	13861	7103
44	17782	18112	23006	17633	17384	30481	20356	10642	18316	23485	21746	25785	11898	18540	16658	17585	15992	20255	18930	15580	5325	17807	25224	16402	20346	16130	15100	9045	21238	17735	16248	17262	19092	21971	19426	21580	17467	21859	19526	7472	12036	19960	18211	14872	22001	12076	17989	19462	16358
45	16287	17926	22626	15770	16386	32046	13576	16303	18288	20332	16870	11664	14587	17503	16292	14149	14998	18221	9670	10471	570	8588	17779	11295	8496	7579	12077	19541	9857	15363	6858	11636	17374	9902	13309	20371	10761	14924	15123	16896	10068	13239	16371	18996	16561	8121	12180	12695	9628
46	18727	20668	24672	18773	19091	38467	14956	18006	18507	25078	20196	17705	18957	20079	20258	19710	19137	23994	13457	16259	-173	11071	22878	19613	12980	14928	19471	27768	13271	20794	12511	14738	23936	17778	16775	25052	15420	20034	20711	20719	15982	19421	19052	27062	25966	13243	13881	15550	13001
47	15774	16959	18285	14245	18323	25364	18106	16885	15693	19625	16241	17558	17520	15493	15027	17843	16608	21275	13835	15428	17866	10551	17883	17002	15190	19025	20134	24477	17671	20166	18311	15303	21605	20434	14547	22296	17384	14555	18758	18028	18336	16631	16624	22681	19904	15388	11217	15535	18960
48	264	513	609	183	291	245	171	487	371	43	264	237	184	159	173	134	490	304	163	294	71	285	340	249	326	172	151	149	218	497	254	217	366	159	677	118	140	70	154	179	231	243	197	267	152	306	104	342	432
49	70	153	66	-54	78	-40	-25	-19	-41	-14	-4	14	-52	7	21	-58	166	78	20	147	52	-2	45	-21	220	-8	-161	19	-8	399	100	-6	-236	-90	473	-68	-109	-12	4	42	-66	-45	-11	92	-79	18	-73	6	257
50	298	285	187	260	287	222	141	115	323	320	209	195	165	416	283	153	285	476	154	264	184	164	203	-78	610	158	201	229	-61	859	216	222	138	81	795	72	89	155	129	305	218	146	233	442	262	254	-2	367	331
51	6750	2215	3325	3058	1130	3906	7761	4277	6114	-9	1531	4239	55	628	2773	124	12	2682	145	318	19	7518	7453	245	9085	322	4681	6418	92	207	170	1491	12616	281	584	30139	15215	30496	17714	319	346	421	222	200	104	355	249	561	1733
52	6559	3824	3349	2442	1056	4530	2532	4542	3916	532	3538	6599	892	1774	3588	1106	902	6134	986	912	1263	8237	10411	1070	9692	2367	3692	27707	2029	2582	851	2967	13679	765	1365	9827	12263	15351	17926	1714	1313	1618	1233	1930	446	1817	1354	2244	3481
53	1164	655	927	527	448	277	735	1067	738	774	773	360	358	872	363	978	1380	735	808	832	740	632	370	871	1192	800	522	456	344	822	323	963	816	-6	685	211	190	82	187	685	751	-287	970	102	431	723	411	1127	1046
54	2982	3187	3097	1731	728	1644	4024	1077	7941	686	1651	1543	910	3948	2029	1558	2745	3497	1222	1865	607	1171	1812	155	1573	794	4329	622	601	1041	968	1218	4062	1668	1122	1562	546	952	2346	717	922	1151	630	985	826	847	1995	1521	1637
55	240	86	252	-171	28	71	-132	-134	235	-41	204	149	-184	67	97	28	-327	167	90	-120	-69	142	108	75	275	-55	-197	72	-68	129	-56	35	-252	133	252	-16	53	140	126	50	73	-182	176	-19	67	28	43	209	-55
56	132	301	524	-76	89	302	171	92	655	96	426	179	57	382	170	237	71	385	-23	247	152	385	203	104	412	25	-162	267	257	8	268	95	0	220	124	308	131	66	335	132	158	45	254	215	119	-72	111	271	343
57	546	530	911	327	120	572	465	310	741	200	446	671	136	393	437	204	195	422	241	327	104	430	286	-3	879	194	303	-70	440	158	84	262	294	183	223	180	66	109	402	147	234	33	45	87	172	169	210	596	351
58	-1	185	140	-91	-220	382	-196	-106	131	-173	-115	117	-179	17	-2	-216	-608	-133	-114	-437	-204	-88	41	-149	-9	-146	-3	-299	-155	-232	-132	-105	-105	-90	-245	-211	-399	-85	-7	-154	-179	-246	-192	-32	-329	-507	-241	-141	69
59	336	418	761	511	65	705	448	1073	584	184	249	291	162	586	237	163	407	437	155	57	37	453	364	514	251	244	646	193	660	435	-4	133	1062	216	516	166	-52	142	392	155	175	102	33	183	212	484	261	332	639
60	151	263	88	484	118	270	458	872	62	194	143	359	66	216	20	250	107	85	412	639	46	126	305	217	420	125	485	241	430	96	65	260	91	261	555	308	472	108	249	118	59	206	171	245	267	381	289	324	473
61	72	21	-27	61	16	85	-10	25	-38	65	-111	12	39	68	42	18	97	49	41	83	28	26	174	-34	154	45	87	-38	4	31	-212	28	68	45	168	34	249	76	-3	44	-42	19	29	28	12	66	124	36	0
62	281	250	358	118	197	71	168	296	198	113	164	185	111	165	174	148	183	197	225	2194	191	99	197	290	1559	110	178	251	131	138	1147	128	327	123	149	219	585	127	215	174	154	101	1421	501	84	131	167	205	341
63	36	43	42	39	39	32	10	59	27	39	19	35	41	51	-24	50	13	13	59	40	-2	24	3	41	32	21	162	98	68	40	35	46	96	51	31	167	202	38	49	43	26	-7	15	65	-24	164	20	11	-7
64	-299	-103	142	-11	237	-112	87	-520	148	-25	-125	130	-16	-48	146	46	125	30	73	11	79	-190	-113	343	70	76	-57	-260	181	-120	-77	0	-354	125	134	121	161	10	27	-22	18	101	125	87	-184	-110	-30	180	-163
65	57	169	359	274	311	232	131	70	313	204	307	158	971	315	498	125	366	165	285	813	534	28	134	380	208	285	197	149	70	283	285	833	190	353	372	249	275	115	37	61	93	347	382	115	89	257	195	79	110
66	186	219	237	245	186	30	199	556	259	54	87	54	220	110	207	177	488	166	99	199	173	19	104	203	80	23	115	275	406	113	172	390	199	259	122	209	360	63	129	127	94	188	308	179	117	193	2	320	259
67	1647	2043	1997	2128	1608	1354	1784	2911	2117	1408	2117	1438	2256	1772	1770	1732	3172	1288	1514	2702	1405	1840	1424	2270	1404	1479	2325	2573	1963	1082	1548	2222	2867	2548	884	1128	1604	785	1249	1300	1541	1910	1813	1505	1333	1993	1232	2412	1632
68	137	188	91	-82	204	-112	52	-44	-2	49	29	306	377	130	209	47	-95	136	4	237	203	553	-37	448	134	85	161	168	81	111	239	246	102	566	175	142	197	72	-12	31	78	20	270	216	57	113	10	131	33
69	803	756	2514	1489	322	750	409	1074	1495	246	706	629	964	666	548	668	1128	839	807	1258	209	748	902	1207	481	799	1125	1151	1021	530	582	592	750	181	454	336	383	270	371	620	882	548	348	595	347	607	180	813	654
70	-894	-812	-1715	-969	-444	-1338	-1512	-1799	-823	-503	-570	-635	-528	-979	-721	-723	-1081	-397	-836	-851	-473	-627	-564	-502	-418	-403	-1693	-885	-1036	-1281	-451	-1046	-1940	-322	-990	-394	-355	-586	-628	-538	-466	-819	-532	-407	-893	-893	-922	-1157	-1106
71	-632	-700	-603	-909	-254	-640	-823	-913	-686	-618	-478	-423	-645	-451	-331	-566	-787	-619	-482	-580	-287	-438	-834	-366	-351	-450	-1871	-883	-800	-703	-369	-1123	-1394	-781	-1115	-538	-872	-925	-745	-976	-558	-296	-716	-179	-464	-1037	-447	-753	-716
72	378	249	362	266	554	110	312	238	896	229	2433	38	937	719	1289	357	491	712	553	857	863	1166	250	579	-112	278	-345	-106	16	272	769	1766	-170	767	247	515	258	-1	26	531	937	658	684	1810	314	239	335	88	-199
73	-26	-242	-31	-181	16	-208	134	13	-11	-422	-98	-58	-863	12	-85	-237	-392	-288	-318	-645	-207	134	36	2	106	-524	-190	-685	-260	-315	-277	-420	-331	62	105	102	-297	15	80	-133	81	-154	-365	77	-504	-399	5	-279	115
74	-691	-369	-1385	-900	-58	-1077	-831	-554	-297	-359	-148	-737	-582	-363	-547	-352	10	172	-438	393	-292	3	-302	-236	-144	-13	-1157	147	-891	-124	-365	-637	-331	-518	-490	-10	-444	-140	-218	-19	-107	-68	331	325	4	-556	-411	-482	-601
75	2	-14	-374	-237	-78	-190	-228	-331	-57	-99	-106	-99	35	-163	-136	-169	-106	55	-165	-224	-37	-197	-184	-258	-83	-175	-104	-328	114	-63	-39	-59	-633	7	-165	123	148	-77	-58	-39	-118	14	-51	-109	-69	7	-114	-202	-137
76	-156	-98	-213	-156	-95	-81	-55	-85	-41	-68	-62	-28	-50	-185	-65	-81	-73	-86	-48	-109	-196	-107	-39	-123	-92	-133	-181	-77	-23	-114	-56	-57	-247	-112	-43	111	54	64	-44	-75	-145	-83	-56	-35	-52	-162	-149	-87	-139
77	155	131	270	115	45	78	173	121	90	95	128	50	113	52	59	75	18	118	155	163	139	139	117	228	138	94	262	301	79	163	-27	138	185	89	182	228	139	122	133	70	131	64	178	91	7	90	109	168	108
78	355	431	603	255	569	136	282	295	450	400	487	227	765	255	286	470	255	182	354	833	753	291	364	320	169	169	309	111	228	261	180	863	266	258	182	305	191	121	88	386	887	329	602	476	204	169	246	274	625
79	1149	941	1924	1078	501	1374	1357	1760	1897	792	1009	651	934	1100	359	828	796	605	952	920	502	810	807	833	847	646	1561	1016	521	695	853	872	1839	475	898	719	781	509	448	510	762	479	669	748	654	1032	655	992	1187
80	-131	-95	94	-24	-15	-88	33	-152	34	0	-42	-41	55	-44	-56	3	14	46	85	41	4	-5	-106	-48	50	43	137	-60	-202	-6	8	-139	-2	145	74	103	86	67	52	122	-63	123	16	-39	92	25	20	-89	-43
81	158	328	301	238	181	26	57	143	389	22	356	100	229	156	145	136	345	179	-9	326	172	-7	-20	140	145	114	20	190	-8	311	195	285	44	50	185	246	210	73	103	172	239	315	468	145	159	151	119	134	60
82	1084	1215	1281	1316	296	841	1041	1253	1375	968	1567	494	757	990	631	965	1319	434	729	2048	838	584	438	1327	606	790	1891	1233	510	1111	802	1652	2356	410	591	584	359	711	737	861	1153	1208	1089	515	828	865	442	1376	699
83	87	53	128	112	-39	144	65	203	93	24	54	-1	-49	-12	90	-95	201	-30	27	260	51	71	49	102	-64	-53	208	207	551	13	-67	-8	141	3	64	-28	40	-18	34	-28	-14	18	-16	49	-24	180	0	57	7
84	125	-81	70	41	-1	64	-87	50	41	6	2	66	29	51	14	3	129	-17	-36	-14	93	-34	43	72	-39	-33	46	0	-266	33	39	38	-58	18	-26	-163	-216	-49	-3	1	27	-7	4	-24	-39	0	-12	-17	38
85	11	20	12	34	-2	-32	-95	11	-79	19	-89	-18	29	-6	32	9	80	73	15	367	458	150	7	-19	4	17	106	43	-16	149	136	35	112	46	221	164	30	-15	75	44	77	84	19	9	-19	46	-45	-52	-26
86	553	215	460	512	514	515	347	1031	392	300	550	337	560	457	539	251	535	365	263	997	277	821	178	903	430	350	414	767	604	176	346	583	705	403	141	60	185	369	159	143	261	323	494	115	474	581	172	782	529
87	152	104	-3	-147	-29	88	-13	-109	35	-30	-22	27	-43	29	212	84	-38	0	-65	14	-99	-62	62	88	121	50	-172	195	105	-171	102	-103	-236	82	-64	-143	-20	85	-99	56	13	79	63	19	72	51	185	88	12
88	759	1656	1130	1062	822	1020	1068	1455	1099	1164	662	753	728	918	943	644	2703	916	677	1251	138	1557	750	814	667	616	1187	1214	1080	1053	674	708	1260	1051	1747	1320	730	825	1072	774	690	1119	866	564	958	1377	1357	1801	1024
89	551	739	885	654	756	769	467	1015	842	439	1368	304	881	704	925	480	1160	583	348	1236	326	541	530	791	388	366	627	461	537	868	432	1263	750	615	545	252	439	349	165	462	634	904	764	619	401	499	269	697	372
90	34	37	141	90	159	12	139	130	69	78	189	11	233	160	115	196	295	52	81	453	233	36	104	236	26	40	104	48	187	41	92	445	91	150	93	80	63	-10	10	12	51	181	41	151	79	87	68	64	134
91	588	781	1044	652	999	576	764	614	1321	493	1168	196	637	728	609	647	610	342	278	1296	442	500	412	1043	365	603	859	311	1037	887	342	1019	750	749	761	472	849	313	361	608	725	1180	1173	463	361	602	218	628	637
92	129	182	423	147	243	136	110	79	376	206	326	96	469	373	219	138	520	178	129	419	351	-3	180	416	61	118	150	115	175	189	159	705	279	298	199	231	148	62	86	-7	39	268	152	79	154	314	205	121	218
93	1128	944	1019	904	1037	528	956	766	1058	905	1104	419	1364	972	851	485	1396	611	574	1882	475	1145	592	699	791	784	1297	494	585	864	754	1655	1028	629	569	355	930	596	617	571	537	907	1134	915	396	515	388	1094	423
94	919	759	1019	614	691	410	658	1088	707	427	605	505	701	631	385	524	799	643	583	935	353	656	516	758	548	557	921	473	859	525	542	852	948	422	771	348	489	394	361	592	586	517	624	590	474	728	419	852	779
95	399	219	650	761	263	261	982	244	244	263	238	347	92	296	200	358	426	239	410	295	74	401	243	587	225	307	882	82	860	217	235	149	823	194	247	226	216	197	266	112	530	125	365	72	366	203	226	325	226
96	-206	-87	-183	-254	-122	-174	-282	-116	-42	10	-88	-70	-68	-113	-90	-50	-133	-143	-136	-134	-107	-134	-36	-160	-107	-89	-190	-70	-77	-105	-142	-149	-138	-54	-60	-38	-93	-83	-72	-42	-51	-117	-68	-21	-52	-25	-38	-237	-189
97	20	13	-33	-9	-17	-42	6	34	-11	-2	-61	-31	-23	43	23	-2	-14	13	-22	15	-29	-34	-62	25	-10	24	42	-14	30	-27	-27	-16	-49	14	19	-66	-81	14	7	-14	-9	-1	10	5	49	-33	-5	-35	12
98	271	595	457	414	397	145	499	530	307	305	199	353	296	603	386	299	357	289	228	452	272	320	341	897	252	200	874	226	632	253	250	402	527	137	286	145	127	184	125	182	149	456	355	320	272	198	183	596	774
99	78	142	205	142	85	135	176	283	187	60	149	54	166	136	165	134	59	98	88	202	126	94	250	101	93	68	175	111	286	84	86	218	205	167	245	40	161	7	27	128	127	136	140	152	204	61	299	102	305
100	32	42	2	-26	-23	-69	-10	14	-10	-7	24	15	3	2	31	4	-33	-76	-1	44	89	20	11	-45	-21	-31	-23	-74	-86	-19	-54	-39	-79	-73	28	34	-57	14	-58	-3	3	-39	3	23	-99	15	-35	-24	-86
101	245	125	124	99	89	92	238	46	17	154	169	64	107	65	59	128	171	97	94	169	16	-9	131	130	33	60	336	260	262	163	25	186	333	158	79	105	110	98	125	110	77	138	150	91	124	46	106	152	110
102	-98	-19	86	-57	-199	26	110	59	45	-80	32	-28	-128	-195	-17	70	-61	-121	-54	-63	-154	-206	93	-113	-167	-86	81	-45	-223	-53	-226	-175	-38	-211	-249	-308	-351	-53	-163	-113	6	89	-77	-47	4	-244	-198	-150	-79
103	70	180	92	150	149	136	52	172	137	73	272	90	115	102	55	53	340	-13	66	343	62	160	317	271	167	108	145	79	216	165	260	257	226	93	62	25	518	72	57	52	109	166	102	46	129	187	99	220	43
104	146	224	15	-87	169	85	-3	101	75	-62	233	41	121	-15	109	15	306	124	21	102	-42	138	-93	278	253	78	-62	161	-42	222	287	191	280	-76	240	53	-14	187	-128	691	554	96	694	119	154	141	-88	166	189
105	-260	-638	-402	-862	-254	-88	-635	-1365	-452	-247	-239	-321	-488	-525	-250	-74	-616	-229	-6	19	-52	71	-321	-280	-157	-109	-162	-19	-58	-161	241	-339	-103	-267	-305	-295	-533	-140	-148	-49	-246	-85	-193	-152	-19	-25	-299	-238	-406
106	117	0	-12	-34	65	40	-90	-86	-11	30	122	8	65	28	8	19	76	11	36	74	68	35	36	123	59	-4	0	115	76	58	88	31	64	23	91	8	35	-2	20	19	41	17	124	19	49	0	-45	79	-64
107	2236	5198	4263	3083	3569	2832	2478	2905	4693	3191	3621	3397	2711	3055	4572	3307	5055	2585	2288	7634	1310	2063	2538	3440	3634	3334	2960	3089	2364	2152	3038	4192	4041	3313	2805	2920	2714	1253	2110	1777	2687	3998	3027	1718	2596	1923	1601	3766	2269
108	729	533	960	675	425	686	910	779	850	777	727	586	555	439	474	728	801	404	528	443	441	648	854	850	527	437	884	996	461	506	596	689	826	491	533	640	411	467	578	511	503	457	533	378	501	697	343	789	776
109	-1031	-1029	-1667	-942	-964	-647	-767	-1980	-1202	-1007	-1029	-199	-936	-1004	-324	-1025	-1790	-693	-731	-2070	-446	-952	-701	-564	-862	-775	-650	-936	-950	-1198	-693	-833	-636	-571	-915	-830	-840	-492	-504	-1108	-1090	-1367	-853	-587	-262	-808	-701	-1297	-913
110	362	387	646	294	580	430	307	281	662	326	417	353	653	442	614	439	416	374	217	1000	128	206	167	789	507	365	84	325	0	385	472	536	447	488	437	480	496	206	312	324	343	699	474	434	554	368	355	223	74
111	-28	36	2	-112	56	-115	-68	-11	-20	-60	-5	20	-51	-24	30	-80	87	17	-6	118	6	41	-9	-19	-37	-23	106	154	-58	62	84	-116	142	-283	-62	40	-264	67	-80	-179	-69	143	114	-166	29	-74	-116	-12	-62
112	-294	33	110	12	15	-67	-38	-221	-158	-99	-140	-80	115	-218	32	-100	-50	-93	-39	-310	-181	-153	-64	277	-66	59	98	74	-155	-4	42	85	-29	206	180	56	4	14	-32	-66	-158	164	45	44	-72	-72	43	-200	-197
113	333	128	352	109	151	208	162	149	309	97	176	189	102	190	24	111	12	176	89	91	107	201	237	231	135	169	231	214	243	129	168	130	307	76	237	214	222	121	91	101	151	34	175	151	127	283	48	203	290
114	207	-10	109	520	-126	401	-220	188	180	136	203	505	110	125	90	-65	-202	-235	-51	-461	393	487	288	398	32	-222	92	-456	1026	157	254	414	49	203	-182	50	267	-166	63	144	89	566	35	211	92	51	-122	333	538
115	-1305	-887	-1792	-2151	-152	-705	-1601	-1742	-667	-79	-579	-665	-884	-878	-573	-408	-960	-583	-102	-995	-643	-1137	-647	-540	-540	-639	-420	-591	51	-168	-647	-1373	-2802	-463	-370	-705	-1100	-691	-581	-817	-610	-374	-759	-600	-681	-903	-584	-1094	-697
116	-214	88	-270	-203	40	21	-181	-32	-158	-59	-115	-165	-118	-96	-64	-38	-124	-26	25	-100	62	-36	-165	-178	-81	-75	-92	-378	-291	67	-174	28	-78	-4	103	-186	-285	-67	-75	-48	0	56	28	-122	-82	-18	-129	-89	-420
117	141	199	226	108	224	144	220	31	177	172	109	150	57	152	186	137	126	112	98	220	39	31	201	97	100	52	247	118	111	153	8	7	354	169	156	97	87	46	103	158	73	226	125	115	229	198	91	67	91
118	-97	348	150	135	280	-176	176	-263	327	89	485	-57	349	92	199	47	192	110	-74	382	213	17	-1	463	82	46	275	-55	140	189	54	449	349	93	24	123	-54	82	-66	34	225	265	310	117	99	118	-109	142	-180
119	169	71	92	88	196	-24	146	53	132	39	102	18	293	-27	105	256	80	15	162	704	203	51	18	245	17	150	9	16	39	-161	130	209	-17	147	-69	20	-131	-46	1	50	162	265	193	148	22	48	147	23	-31
120	-135	-27	-320	-240	-183	-142	-455	-683	-86	-22	-158	-136	-46	-271	-218	-186	98	-93	-706	-668	-184	-370	-265	-212	-475	-288	-132	-243	-275	-630	-296	-445	-300	-115	-733	-163	-242	-66	-125	-245	-254	50	-388	-223	-62	-167	-124	-17	-348
121	7	-5	5	3	112	-51	-1	92	-52	-71	-13	41	38	15	82	-44	4	-4	-37	27	1	15	-81	14	-64	-43	-9	-31	-20	6	-42	26	-103	51	-43	-63	-98	54	-66	-9	-26	75	29	57	22	-5	-48	-30	-4
122	-273	-71	-191	-269	-48	-243	-272	-337	-129	-152	-29	-17	-53	-237	79	154	-149	24	-347	-596	-138	-154	112	-213	7	-63	-344	-65	-505	-284	0	-186	-396	101	-84	8	-353	-157	-140	74	-138	104	-174	-272	-57	-190	-282	-17	-120
123	457	-45	376	325	221	280	361	740	296	-150	127	-149	458	489	75	-2	-13	342	-77	164	-7	211	227	432	3	55	-65	439	396	73	128	206	-1	469	-194	131	-205	321	211	-3	34	11	582	509	92	74	170	200	281
124	1002	1152	953	1012	885	901	920	1706	976	967	1008	807	603	811	716	1280	2046	817	811	2446	775	1016	875	431	1314	852	1034	1050	550	1291	998	1044	1742	305	497	588	834	210	366	848	709	985	799	520	951	126	724	1486	555
125	-62	-83	-91	-172	-40	-49	-36	-97	-45	8	-69	-122	-26	-61	-70	-86	-184	-43	-91	-8	37	26	-72	-77	-19	-7	-179	-137	-74	-95	10	-76	-195	-67	-88	-115	-57	18	-100	2	-13	-82	3	23	-77	-95	-20	-76	-211
126	-468	-829	-496	-739	-55	-542	-566	-512	-451	-425	-235	-518	-254	89	-141	-417	-678	-22	-233	-629	-473	-426	-550	-279	-185	-334	-1026	-485	-669	-454	-245	-330	-626	-485	-668	-435	-521	-278	-18	-264	-383	-807	-118	-218	-252	-345	-432	-108	-355
127	-154	-50	-177	193	-71	104	248	415	-217	62	31	79	-61	60	-97	124	232	30	88	-143	207	-224	184	96	-191	-124	159	-62	216	-116	111	-77	-59	220	-88	-87	145	-66	321	26	33	134	36	49	189	95	-188	29	-19
128	-119	-12	-29	-29	-36	-42	10	43	-75	36	21	5	-97	-36	-46	6	-27	-103	-72	-52	-64	-22	56	-36	-7	-99	78	-217	-131	55	73	-65	7	15	-52	-158	-144	-60	71	3	-121	38	-41	-59	-42	-216	-5	-158	-115
129	54	117	175	235	150	142	221	217	141	171	88	132	206	215	249	344	439	149	275	198	276	138	188	250	194	199	350	140	303	149	317	257	304	167	245	155	221	128	170	130	214	183	214	92	204	236	99	162	-9
130	180	372	491	528	162	446	527	893	480	421	259	334	111	81	509	211	857	391	11	110	406	443	632	542	144	142	650	786	458	186	430	348	689	262	197	330	954	252	439	250	377	427	214	325	312	314	368	668	365
131	373	480	856	506	213	414	772	836	449	128	152	363	201	277	140	135	1006	312	281	417	191	347	455	362	358	349	974	224	390	443	329	285	716	37	478	459	392	187	287	401	387	727	147	183	347	399	195	523	425
132	484	485	-159	597	155	501	774	982	-341	59	72	505	102	313	303	338	-106	-78	-137	-545	357	-221	590	418	573	251	747	7	774	26	-260	4	425	-316	413	123	-189	112	547	378	218	29	-94	174	-72	-5	-7	70	60
133	99	21	-6	33	110	76	70	76	98	9	-23	-73	116	80	97	47	132	23	56	207	-28	-166	-1	54	-17	-15	-37	19	43	23	94	61	-95	54	43	65	17	132	68	72	-6	156	240	50	-24	28	2	-12	-91
134	65	92	163	139	107	76	68	-40	98	62	25	21	151	68	62	89	110	95	57	176	196	-23	-41	51	24	60	29	26	-43	88	126	217	19	4	69	-37	-64	28	51	12	82	122	104	50	74	59	25	42	2
135	-60	62	30	6	-16	-35	-13	56	-62	49	4	-48	28	32	33	14	-30	10	5	16	-39	-64	-13	68	-23	-4	18	43	-74	-15	-2	-11	29	-12	-55	-93	-149	-5	-9	1	9	7	61	28	82	23	15	-67	-19
136	451	647	842	531	514	487	403	671	492	422	351	352	458	510	424	525	567	1242	296	633	1036	459	469	696	328	410	791	630	1758	288	357	325	747	258	593	131	404	284	165	662	694	374	406	728	454	414	416	751	598
137	197	119	293	118	200	44	181	206	93	55	152	8	137	86	103	124	182	110	56	339	6	-66	-7	44	78	96	-103	-4	-76	-203	92	304	-356	54	-4	97	-74	141	60	91	45	107	19	126	37	108	213	152	-209
138	946	178	2011	515	478	553	1073	2126	743	629	686	181	1420	768	400	913	880	837	914	1449	427	564	70	1474	69	778	391	2044	1425	211	1445	1201	-293	809	502	938	546	1147	583	381	646	54	987	275	594	852	1029	511	863
139	1190	866	1408	948	1129	983	1287	566	813	765	460	1096	1029	953	1067	737	528	688	443	1089	258	126	431	1302	551	792	658	922	805	348	504	1249	1029	817	451	748	781	820	360	738	946	1387	1718	600	456	509	963	1299	887
140	370	1466	1334	552	711	227	530	527	1693	642	397	319	560	567	532	502	846	450	325	1277	194	421	480	848	168	363	496	432	382	854	565	485	1007	383	286	757	623	425	388	556	597	1432	380	1026	674	409	604	443	394
141	-300	17	-330	-141	173	-156	-628	-410	-451	-398	-132	-232	3	-189	-58	-377	-31	-117	-156	9	-201	-239	-357	-21	-39	-39	-311	103	-898	413	-157	-256	-386	-12	21	-23	-171	63	-64	-76	-223	113	183	-171	69	-128	-437	109	-548
142	330	43	428	449	122	245	144	178	169	61	182	7	273	165	158	230	177	209	235	487	103	375	321	299	118	36	75	415	83	300	130	121	366	123	564	112	148	283	199	222	234	187	248	265	224	324	335	109	456
143	141	21	-57	87	244	64	465	374	75	14	48	146	112	203	317	290	52	62	169	122	136	37	151	400	104	-39	1	135	-1	270	151	180	-29	178	122	127	74	343	-24	490	-3	168	283	159	94	66	71	375	206
144	260	362	400	361	389	156	283	203	310	265	309	201	544	282	461	373	258	269	264	1157	778	187	155	600	156	127	292	214	161	194	294	942	311	345	350	214	365	82	137	363	355	772	447	256	167	208	355	209	108
145	124	65	-102	-68	24	-16	-109	-55	-90	-10	-2	68	158	-21	84	-9	107	-86	5	1829	930	51	-62	215	247	62	-168	-103	96	84	571	175	-428	103	572	361	204	-38	102	5	37	-65	443	203	-202	-15	111	-158	9
146	339	453	297	403	440	357	317	568	296	253	268	188	288	342	366	276	993	179	196	541	23	223	288	483	452	137	375	403	185	269	306	224	364	173	451	464	715	420	194	459	163	529	438	290	204	484	419	538	363
147	288	95	93	142	214	64	77	266	14	51	361	30	440	361	312	115	775	140	98	1007	-19	82	45	572	84	83	34	36	311	204	54	435	220	284	382	235	224	138	74	81	177	471	488	257	39	144	147	117	60
148	1032	635	1175	1079	658	1365	1424	1520	1506	449	741	767	722	1118	633	1136	750	668	712	1299	805	907	1229	1192	925	620	1395	1373	1133	421	661	804	1793	601	735	689	477	863	966	356	610	479	396	648	716	1042	737	1561	884
149	36	58	63	38	120	92	16	169	43	-18	26	-81	123	89	268	171	53	-5	86	267	206	-23	-87	135	-35	2	20	-24	30	26	44	154	45	122	158	173	36	0	49	-1	10	164	22	2	14	-46	33	-105	-67
150	-66	-239	-328	307	212	314	-653	332	221	-106	-169	-446	-93	66	123	-60	-404	-146	143	331	573	-155	-288	463	90	129	-799	540	-1076	-215	445	-165	145	-25	406	-97	-109	-75	-41	280	-129	-61	16	1073	446	476	-251	-6	-315
151	87	548	93	-31	159	101	119	589	245	451	91	484	458	158	128	225	555	288	97	1757	363	598	207	153	534	149	680	627	172	591	130	219	468	136	286	330	276	219	293	433	366	365	393	472	112	419	25	74	211
152	-12	139	237	104	29	-8	223	416	10	59	29	91	-14	105	37	106	485	134	109	104	144	158	106	78	95	110	34	123	150	100	-73	61	302	111	57	269	208	93	176	114	45	-39	30	87	79	100	238	-95	113
153	318	243	19	108	40	112	329	166	110	159	96	-71	139	112	-36	345	1057	176	268	180	382	15	197	32	306	110	424	24	49	283	-2	-62	565	352	127	88	253	18	83	166	55	328	164	-51	199	110	78	81	259
154	1219	1055	1820	1074	822	394	1154	1763	1157	902	837	178	1077	171	316	1317	2041	1140	1053	1767	630	1212	281	1559	460	1196	843	2539	540	1829	920	1046	2739	220	641	504	321	272	737	1042	1094	1219	996	342	1110	702	119	914	240
155	476	611	850	691	1304	346	653	550	826	472	439	239	1558	705	942	560	1366	369	584	2460	0	206	537	1205	337	385	536	685	382	566	531	1432	923	943	331	678	728	951	382	509	378	1683	2115	227	911	468	315	424	300
156	-466	-49	-277	-670	-180	-453	-700	-191	-163	-183	-329	-431	-43	-296	-73	334	-436	105	-282	29	-176	-56	-142	221	-137	-211	-863	-200	-430	-529	117	-365	-1086	36	-197	-134	206	181	64	-260	-63	-78	41	-12	-7	66	-142	-852	-529
157	895	749	1049	1016	634	752	920	254	934	536	607	456	617	592	624	608	925	833	473	801	348	592	478	944	682	611	1391	1585	550	468	388	772	1619	494	519	385	1450	381	549	740	717	541	694	670	644	715	378	924	524
158	-451	-108	-265	-378	-171	-257	-514	-250	-291	-218	-129	-137	-146	-128	-159	-223	-311	-256	-209	-415	-122	-252	-355	-325	-173	-333	-552	-511	-305	-280	-237	-247	-531	-92	-96	-121	-188	-93	30	-150	-327	-193	-122	-189	-292	-306	-134	-341	-310
159	687	829	914	982	1294	743	680	527	1352	675	383	616	1071	1004	1106	547	1790	574	660	1828	394	996	457	1366	486	141	342	511	708	815	897	1472	515	1194	1273	979	959	600	451	405	198	1904	1608	313	888	417	531	588	613
160	-591	-415	-653	-546	-264	-503	-875	-490	-778	-329	-391	-290	-275	-365	-370	-240	-235	-135	-403	-145	-181	-418	-507	-378	-362	-292	-242	-340	-228	-329	-63	-164	-349	-122	-252	-253	-108	-219	-222	-316	-125	-344	-300	-122	-84	-409	-546	-544	-824
161	-94	2072	1658	2209	5846	1189	2263	1015	7449	1483	2527	1352	1974	718	1727	2161	1707	299	-2	714	1833	627	664	1057	400	1063	2664	55	2245	590	1399	1065	2364	2883	-64	-29	872	376	433	-61	818	5413	2649	1740	2122	-5	696	69	476
162	172	87	323	261	536	-277	210	311	194	137	291	-114	144	18	263	274	-10	17	314	275	164	-31	89	178	117	239	158	14	-114	287	252	186	237	370	305	284	217	433	473	213	430	520	475	51	112	149	157	279	-194
163	1800	2629	3933	1438	2439	2046	742	277	6284	2216	3658	1033	4359	1290	2102	529	2196	1721	1171	1350	782	442	1518	2200	991	629	835	1023	591	2972	1632	3359	1588	2468	1547	3901	1071	2090	502	153	1002	1673	709	207	1892	1501	2178	458	942
164	194	287	695	544	104	330	588	827	177	283	285	80	87	254	117	151	248	172	293	137	163	523	205	261	105	190	89	337	464	373	329	329	333	122	81	195	196	197	128	175	230	207	235	64	239	133	360	178	290
165	-77	94	-181	-142	37	-17	-196	-80	61	-84	-35	-24	-29	-112	58	-23	-31	-30	-15	114	-19	-1	-72	-45	20	-18	35	-45	-40	11	6	-149	64	-4	0	128	348	25	80	-3	-34	59	55	31	-99	-77	40	-185	-98
166	40	87	77	136	223	-23	42	-26	82	66	68	8	68	86	75	44	107	-9	41	544	697	6	81	208	-15	43	26	-43	38	35	56	177	-11	90	36	-10	72	33	40	-32	-26	185	41	55	27	-7	-55	10	-9
167	274	432	640	283	201	208	445	802	451	338	279	83	257	296	61	307	360	349	566	1357	383	291	359	191	344	91	438	328	229	3048	1172	426	517	180	980	214	195	249	266	196	274	181	371	147	344	247	116	279	699
168	746	593	1778	783	1147	540	779	398	1595	579	1187	517	610	770	1056	531	347	761	511	2159	1195	530	469	841	425	275	434	456	447	905	630	1487	636	571	293	750	466	521	208	335	399	1055	913	407	401	296	414	284	562
169	649	1420	1167	893	1423	659	717	542	1432	1666	1516	731	1630	813	1520	867	587	894	628	2992	2313	400	1005	1575	447	707	500	794	529	1036	638	2769	923	1017	1343	1724	839	1660	1067	785	945	1748	2198	1196	806	363	993	661	1000
170	645	782	1119	770	1202	444	677	337	688	570	802	334	1097	685	857	622	455	654	471	1694	590	286	368	1072	242	240	574	395	376	399	516	1687	430	646	319	475	309	313	284	511	481	1127	1336	476	504	339	625	419	331
171	1324	2304	2677	1415	2076	953	1513	922	3039	1619	1113	632	3365	1781	1907	2398	1405	794	2089	6521	2912	500	972	2411	470	1509	1855	905	1456	913	2008	4608	2495	1895	1305	1574	1181	905	1172	688	791	4330	2301	892	1100	695	1159	815	714
172	42	82	-3	101	80	122	35	-37	-44	-1	23	45	32	73	-36	90	-66	73	-184	-181	-94	28	-22	166	80	93	37	-103	-228	-117	-42	30	-91	100	117	106	19	69	46	47	87	70	-198	24	229	87	83	-299	-153
173	-208	334	-386	366	408	200	381	-215	-322	36	-163	448	-102	153	195	9	192	-182	-114	-52	-131	172	186	177	209	-156	-517	-251	-26	-200	2	-135	-85	306	137	182	138	209	348	231	118	601	-60	87	77	-190	218	908	228
174	-66	58	150	370	709	119	152	62	255	166	156	316	509	243	311	135	149	199	266	382	218	78	83	497	180	269	194	-16	163	143	464	846	-51	273	93	8	314	229	199	18	38	986	899	-87	309	-2	284	224	60
175	397	515	343	36	29	53	-8	19	13	652	549	-7	1420	97	-20	312	438	408	20	18	217	286	550	7	48	13	42	258	212	70	107	592	-14	187	149	464	-35	67	13	579	917	51	44	404	7	5	66	54	24
176	415	641	1053	630	771	604	710	235	1097	420	585	290	550	1051	500	372	281	389	200	508	27	150	478	489	214	317	250	185	415	507	113	287	589	228	120	214	151	373	163	223	494	730	275	73	499	450	226	723	408
177	210	166	380	112	209	259	119	29	43	16	173	81	209	30	45	83	162	141	150	205	129	113	239	275	127	-53	350	200	313	168	220	40	49	42	76	123	281	31	-26	204	205	190	206	298	144	18	142	151	132
178	-252	95	-363	-300	177	-78	-349	-650	-425	68	-198	-142	-78	-79	261	-94	7	-77	-152	274	139	-137	-89	265	-101	127	-639	-111	-49	77	27	24	-7	203	91	-78	83	272	38	60	-70	87	73	121	89	-23	137	-142	-266
179	-36	23	-21	-41	71	76	-70	-61	-14	10	-41	265	-20	75	-36	-42	-62	3	-60	-69	96	-18	-34	-64	196	182	-140	-21	106	23	-18	26	-12	17	-14	5	677	69	-29	115	26	-58	-23	13	94	-64	-88	18	-137
180	350	249	767	420	179	371	331	665	500	396	261	264	463	233	93	278	263	262	-34	220	102	130	317	479	65	266	511	642	402	107	235	437	686	242	161	204	184	423	269	223	414	197	468	277	264	455	345	398	334
181	1497	3649	2853	1853	1507	3549	2772	2545	5269	1873	2998	2558	1319	4519	1826	1385	7260	833	898	3020	1982	676	1485	2367	1956	1813	891	1122	1619	2062	762	2343	2310	1421	665	756	979	937	1197	1088	898	3897	1762	1462	861	2193	2562	2119	2224
182	-42	399	102	-3	504	23	-89	-101	305	51	1031	-47	248	395	391	273	407	109	94	1276	1043	132	132	189	43	68	-17	-50	163	583	271	423	-292	291	170	142	193	85	100	388	239	569	359	380	-4	123	190	16	-48
183	43	-155	-169	47	-67	-71	-144	-350	-68	15	-43	-60	-107	39	-1	-64	-340	-61	47	-167	-63	26	-246	-81	37	-108	-195	12	-5	73	6	-16	-193	18	93	2	-103	-38	-37	-43	-173	-152	-114	-69	-32	159	17	-104	129
184	96	75	93	95	52	53	13	92	80	38	42	45	22	8	51	62	89	45	111	73	62	74	132	128	-5	134	97	171	51	88	-54	62	136	20	-16	121	12	27	109	113	97	98	28	61	-4	95	71	82	52
185	-104	103	-347	-79	-111	-496	67	-442	95	-289	-134	-66	-346	-51	144	-48	-612	19	142	3634	-186	-185	-457	-271	-302	-165	-531	-166	-232	-64	123	-229	-427	-65	110	8	148	40	-74	207	-114	281	-63	-99	-304	471	-200	-83	-28
186	163	34	55	66	56	71	117	46	165	76	29	60	65	92	20	64	37	-68	65	20	107	-48	11	29	-127	-21	1	60	-60	51	-44	79	59	89	43	45	-19	-41	-80	90	-33	-92	35	95	-69	131	25	8	60
187	5	-36	-110	-23	-33	28	63	-17	-39	-37	17	-8	-42	59	-32	-13	44	-9	5	-31	-21	-19	-28	-104	-37	-45	37	0	-10	34	-79	-52	-74	29	24	166	111	12	-32	-26	0	-3	-27	-20	-62	28	27	-44	-64
188	-8	-177	-39	-15	17	-69	-13	-22	-67	-51	-62	2	19	-30	-44	1	-64	-15	16	105	8	-2	-129	5	-42	-38	-9	-118	-98	29	-35	-18	-138	-43	-45	-192	-292	-17	-54	38	0	50	69	-5	-54	41	-10	-70	-64
189	-1247	-1695	-1648	-1409	-435	-1168	-1357	-728	-2050	-1055	-901	-1245	-458	-452	-664	-810	-1849	-866	-733	-1650	-1055	-1111	-1413	-903	-1166	-788	-3062	-786	-298	-1468	-323	-1062	-2283	-1106	-942	-919	-1058	-580	-1123	-793	-594	-1577	-726	-640	-743	-584	-279	-1011	-930
190	-189	-330	-298	-39	-278	-288	-21	31	-353	-8	-308	18	-66	-175	-202	-178	-391	-285	-31	-317	-26	-39	-277	-443	-259	-228	39	28	-313	-135	-258	-10	-103	-187	38	-207	-17	53	-109	11	-31	-142	-178	1	-67	36	-190	-464	-259
191	3245	2925	4093	3827	3814	3070	3540	3731	3821	2746	2481	2940	3016	3406	2834	2459	3480	1794	2806	5163	2516	3133	2564	3124	2271	2477	3683	2768	4058	2668	3339	3561	4366	2268	1728	1670	1874	1877	1605	1905	2107	2739	3120	2484	2793	2062	1644	3900	3772
192	37	22	-44	5	21	24	72	49	43	-2	-3	1	2	1	51	2	57	40	-12	-13	-16	44	70	-2	-19	-13	115	-7	-23	47	0	7	-22	-20	16	-20	103	-4	9	-1	29	2	-13	-2	47	-41	5	25	-7
193	21	21	-102	-21	-20	-71	-11	-76	-82	-21	-42	40	-29	1	4	6	-38	-34	2	11	-48	-19	26	-21	-35	-49	-34	-43	-27	-47	35	-51	-39	-4	76	-109	-85	-10	-88	-11	-49	-26	-74	-5	-29	-128	-10	-73	-98
194	-185	-297	-282	-675	-392	-576	-134	-605	-187	-108	-128	-159	-476	-544	-160	-113	-362	-140	-305	-643	-13	-551	-94	-552	-225	-222	-214	-113	-26	0	-75	-575	-206	-324	-235	2	38	-69	-129	-85	-458	-74	10	-602	12	-180	-503	-358	-108
195	660	1004	1604	499	889	560	33	184	1939	933	960	482	1431	572	737	651	1156	827	710	1652	1080	402	638	619	367	475	120	340	187	1137	777	1955	297	696	435	910	705	710	371	307	551	955	1393	566	34	579	462	640	228
196	2028	1732	2519	2650	3255	1666	1429	1430	3079	1349	2176	926	2566	2329	2288	1962	2755	1335	1665	5912	1569	1615	1130	3047	1061	1396	1699	1366	1933	1252	2284	3931	1398	2020	1050	1303	1953	1953	1454	1129	1237	2795	3292	1388	1767	1501	1845	1538	1322
197	407	68	348	428	484	80	428	16	198	137	94	160	272	251	285	328	562	180	233	809	93	90	91	333	61	143	223	135	259	98	216	453	283	281	26	216	234	173	137	77	151	460	294	21	189	311	94	170	146
198	169	90	254	201	126	167	231	248	190	28	72	110	46	96	35	44	143	80	56	48	44	171	241	128	73	18	145	74	474	52	25	39	131	164	367	118	149	223	193	38	33	88	127	51	52	36	-7	114	153
199	37	13	63	-22	-22	-106	-53	-92	-70	-59	-20	-70	720	-38	-22	60	29	27	285	102	-74	69	-93	-18	3	55	45	-31	87	34	25	638	-79	23	264	-314	-387	102	-37	-18	315	1238	-74	-70	-77	-56	53	-11	-40
200	600	977	1423	698	1839	720	620	388	1986	1166	1156	129	1797	989	1430	960	698	1145	903	4074	3191	222	328	1434	1620	843	1639	330	544	978	1035	3895	438	998	1206	621	1157	1211	442	525	667	1661	3028	621	556	412	1159	910	206
201	129	113	302	187	153	5	325	-10	319	111	204	27	152	329	35	121	812	110	45	204	84	126	20	300	104	131	403	229	147	110	237	106	256	144	84	-7	-3	-17	47	97	177	111	150	437	127	139	73	1165	351
202	667	951	1119	596	786	295	589	533	1277	510	705	432	651	631	523	518	467	231	228	2299	1512	525	459	971	369	285	686	359	289	609	485	866	663	673	401	480	273	372	433	438	585	793	1047	1301	274	453	282	384	317
203	174	44	173	139	148	7	99	31	208	78	136	20	488	65	128	49	52	138	53	150	154	41	125	123	33	12	126	-9	57	207	302	475	0	112	257	244	252	18	95	56	17	61	69	44	107	23	38	2	36
204	126	86	245	153	145	128	178	151	94	115	192	106	236	129	141	51	122	55	54	176	111	162	153	278	101	106	164	115	248	91	58	244	245	98	182	186	241	31	157	134	191	128	205	138	132	267	71	131	245
205	-147	12	-18	-46	-9	17	36	-80	114	10	-27	27	32	-77	22	-14	71	-1	28	276	-99	27	-28	-60	-2	-40	-92	31	-43	40	31	84	-159	-7	-2	62	111	93	13	37	-42	164	68	-31	-24	-66	27	-83	45
206	-24	-134	-213	-60	257	5	336	-98	173	256	34	48	370	211	265	264	149	10	143	1066	313	-75	-121	357	-176	76	-3	195	23	-60	317	449	-262	386	295	177	51	193	-21	94	-33	373	235	346	264	285	322	-146	-120
207	98	138	-276	134	51	-133	53	-70	-255	-100	-132	50	341	-153	275	-95	-26	-190	-68	185	49	-107	-74	127	56	-142	-278	161	137	-94	-96	432	-535	136	86	99	143	96	71	209	50	28	331	23	-169	-41	101	-236	-127
208	4707	3367	-44	101	1276	30	154	2326	1848	114	24	1531	4215	49	259	2418	7650	527	4246	4477	21	41	127	296	2295	5865	330	456	3336	655	2771	3575	1330	37	1826	1710	1450	1653	160	1204	1109	3228	4392	1132	117	1449	1006	812	685
209	656	185	426	975	1196	503	764	380	916	2	321	1401	2099	157	1205	949	1312	292	959	1586	529	417	36	1076	895	1469	298	1105	1204	1751	1008	932	869	945	331	684	2037	1646	120	518	153	3819	1658	618	599	759	2348	1778	810
210	307	1352	640	469	1454	510	608	625	1342	839	1292	765	1464	780	1211	593	1662	406	891	4643	1777	1637	621	1173	532	295	492	760	458	793	863	698	477	818	322	606	756	415	361	834	1718	2236	1712	1632	454	530	399	934	663
211	100	372	-1	234	266	156	137	194	49	106	118	11	129	75	106	196	122	47	-4	127	163	142	153	332	170	112	42	272	150	6	44	134	173	36	302	-148	38	135	-77	101	50	262	234	29	-227	280	30	68	52
212	-741	-218	-196	-796	-384	-110	-339	-670	824	-224	-272	-211	-465	-91	-329	-559	-1570	-418	-217	-386	-238	-256	-258	-495	-278	-493	-1372	-1484	-1300	-298	-176	-558	-760	-219	-245	-216	-787	-121	-224	-211	-563	-366	-514	-347	-269	-947	-180	-1204	-444
213	60	-10	39	82	37	62	6	47	-24	15	34	56	93	24	83	-16	55	53	46	141	6	122	-7	96	17	58	17	125	57	12	136	78	178	26	2	-29	-37	37	6	42	79	58	76	49	22	36	15	-21	141
214	-121	121	-353	18	284	-1	-80	-118	10	73	-19	-91	142	132	232	12	-27	-49	-12	724	-71	-145	-265	83	-78	-14	-46	-53	131	-183	132	91	-374	176	9	-346	-98	-20	-95	-74	-115	157	113	70	4	-190	-139	-85	-158
215	2434	6886	6447	5181	8372	5203	5440	6361	8463	5838	4633	5084	5838	6653	7367	4250	9271	3178	5083	10555	328	4391	3852	7659	5630	4197	3229	3225	4583	4543	6713	6817	3846	5425	3922	4062	6524	5885	3726	3051	3568	7000	10632	3313	4586	2968	1540	9068	6369
216	-330	-803	-1311	-808	-447	-768	-836	-1362	-809	-673	-678	-619	-487	-741	-439	-623	-1141	-729	-450	-813	-614	-706	-611	-947	-605	-859	-1314	-1303	-781	-453	-687	-353	-1725	-159	-721	-585	217	-414	-383	-512	-889	-374	-496	-397	-741	-553	-86	-826	-935
217	557	346	669	450	207	394	477	626	587	409	445	373	294	410	337	340	215	252	205	356	492	457	398	518	271	318	234	569	1267	146	619	444	767	72	249	235	561	95	15	327	258	440	176	427	222	342	238	226	632
218	1634	1778	2122	2331	2452	1104	2117	1184	2562	1401	858	1197	2176	783	3532	1553	2193	2295	1517	4253	1414	1004	704	1603	1076	1950	1896	2293	1077	1809	1607	3233	2404	1745	886	1836	1992	1199	1409	986	1611	2675	2646	978	1705	1158	1822	1784	1940
219	-243	-145	-85	-206	-45	-147	-243	-344	-228	-111	-58	-61	-85	-150	91	-80	-452	-54	-196	-42	26	-90	-207	-58	131	-7	-242	-135	-373	-297	27	-36	-373	-37	-329	-211	-195	-53	-156	3	-7	-165	-23	-28	-197	-95	-91	-123	-298
220	1797	860	2072	2817	3556	1118	1670	818	2511	730	1532	725	1591	977	1815	919	1123	1251	1065	2610	206	1025	832	2208	676	361	882	1479	1264	1218	983	1261	1455	1402	1382	1982	1633	1583	1460	611	1055	3345	3430	568	981	502	889	1219	1466
221	1160	823	858	980	1761	151	1068	677	808	413	433	471	2219	1289	1570	891	1494	441	1504	7309	1163	491	284	1356	960	504	469	231	1427	1093	2927	3479	794	893	870	610	621	1091	348	721	762	1263	2719	1306	456	2345	724	1612	610
222	-177	-56	-175	-165	-45	-119	-78	-209	-132	-62	-54	-50	-60	-168	-47	-242	-96	-61	-129	-110	-51	-150	-119	-95	-54	-128	-134	-130	-136	-132	-142	-170	-175	-25	-84	-14	-110	-83	-74	-127	-153	-84	-77	-98	-22	-270	-15	-176	-113
223	175	102	276	131	143	115	231	130	155	88	171	155	167	154	85	188	230	83	136	191	136	266	174	128	150	175	129	205	127	225	189	239	166	29	141	-34	61	86	74	74	163	94	110	81	142	159	96	108	199
224	55	87	39	-5	-1	12	15	-79	37	35	-5	44	26	1	8	-2	-32	48	-16	11	-53	3	-17	-56	-13	9	37	-45	57	5	-2	-11	4	46	-26	-91	-99	4	18	18	29	48	81	19	-17	-23	-17	23	40
225	-86	-3	-53	103	5	160	67	0	-5	30	51	76	-8	-29	-67	68	1	121	-21	11	62	1	123	-2	-39	-2	82	65	-121	-223	48	-33	142	-28	153	-94	-35	53	0	22	105	-21	-4	130	-44	18	45	-34	-100
226	16642	15527	19494	18849	20259	11800	19387	14498	18727	18364	18050	17432	17886	16647	17094	18770	18647	16456	20801	21417	26343	18051	11568	19439	15739	19919	20597	13361	16673	16061	19362	21519	18585	17067	16511	13143	15098	15230	12071	17966	17544	17040	19197	16347	14861	15038	10739	21372	17870
227	-89	-207	-320	-284	-205	-254	-337	-440	-231	-138	-192	-135	-167	-215	-25	-126	-252	-267	-23	62	317	-154	-131	-88	-110	-120	-594	-410	-300	-82	-84	-66	-227	-97	122	-69	-75	-63	-154	-72	-177	-251	-178	-1	-369	-236	-249	-208	-396
228	885	1239	2864	1146	1530	1202	443	256	3794	2787	2400	686	2620	1765	1721	314	1184	1434	599	503	3023	782	1096	1661	806	485	453	436	412	1541	1666	4514	794	842	670	1145	997	415	340	74	662	1089	176	174	806	1261	876	651	1183
229	1234	411	1131	952	1202	437	939	592	1699	477	547	283	1546	755	1377	1194	1298	461	1196	3110	1691	321	531	1267	303	786	766	444	828	583	1199	2177	991	857	1004	972	711	557	680	223	294	1238	1392	272	521	906	968	338	327
230	122	32	42	88	163	-16	80	8	17	39	8	34	148	131	78	8	147	68	9	127	127	-3	11	153	50	46	3	-12	74	76	0	114	-9	67	28	2	-63	67	9	32	27	57	68	68	52	110	30	22	-62
231	-5	-4	-19	-76	94	1	-55	-68	27	31	2	-14	50	11	-3	-2	13	46	-5	95	-27	27	-110	93	46	2	-37	-82	-36	12	2	144	-51	104	40	28	-40	21	88	-9	2	65	73	-24	-14	38	-12	-53	-69
232	437	757	531	352	495	302	253	337	728	582	646	363	1008	215	371	492	243	147	430	1383	234	598	400	554	276	408	359	400	272	1100	327	805	317	355	324	555	133	337	241	817	1381	537	936	787	157	350	203	298	324
233	492	1210	594	740	839	551	672	829	1259	787	621	691	1455	656	765	727	437	276	612	2303	1527	221	636	1520	413	602	638	417	863	494	540	1553	733	826	497	440	550	433	659	293	543	1906	1444	596	621	533	772	633	709
234	438	739	924	399	633	229	536	532	1076	365	837	334	714	585	726	405	992	419	362	1569	1605	610	387	726	264	301	586	598	202	720	401	1039	814	402	379	363	372	179	335	671	730	1412	771	422	414	180	427	482	211
235	21	82	-18	114	128	58	84	107	0	1	-1	99	31	71	46	-27	586	28	12	87	-28	19	47	151	-12	-20	-4	101	74	1	302	140	-132	84	62	-74	18	47	61	-1	50	290	163	47	112	-36	76	380	139
236	-100	-25	68	17	100	-51	-235	-868	7	-28	-72	-204	125	-186	93	-168	-4	14	-49	90	79	-82	110	-125	47	-36	-151	50	-553	2	172	-59	-121	252	81	189	-100	187	6	-58	26	55	-9	-147	59	-56	167	-195	-339
237	310	294	453	345	16	273	601	806	271	178	56	-20	123	252	53	225	107	345	223	1018	72	368	231	323	462	58	517	354	464	692	445	465	531	212	177	312	111	245	160	-12	250	447	298	384	242	538	279	705	565
238	353	498	875	899	529	218	1255	139	271	-43	297	244	985	193	1112	301	1235	435	269	1542	530	210	188	862	949	763	178	557	436	447	498	925	1273	784	831	594	813	900	267	165	582	1482	835	502	766	988	971	665	704
239	1573	1962	1329	2115	1894	1047	1880	1707	2450	1166	1462	915	2050	1974	2462	1385	7834	1685	1072	3837	3201	1354	1381	2137	1240	1732	1334	1431	1155	1569	2006	1883	1964	1883	1011	1080	2007	859	1271	1166	1315	3082	1810	1403	1510	1568	732	2043	1387
240	185	824	320	187	104	211	129	61	636	307	1477	70	324	134	164	-34	-157	939	44	398	864	206	140	202	338	88	-92	296	206	330	487	319	532	114	175	114	442	232	100	257	303	-172	424	247	152	18	5	197	26
241	3343	6088	6293	5603	7437	3903	4587	3656	9100	3494	5865	1557	5968	5759	7729	6312	10082	4801	3915	13742	10179	3221	4797	6125	2097	4167	4013	2920	3187	3358	5148	6462	5320	5546	3278	3941	3260	3417	2968	2244	3424	8928	6471	2719	4451	2999	2150	5276	3253
242	109	574	314	209	49	268	384	283	271	13	535	71	55	358	260	199	477	499	53	524	308	190	311	299	215	312	713	238	323	315	214	422	616	316	230	-17	499	8	210	413	449	529	496	369	219	296	78	610	702
243	2890	3286	2687	2051	3018	1394	2039	2087	3351	3110	2534	2374	5315	1582	2774	2979	4795	1844	2545	7252	3089	2004	1658	2403	2193	1675	1841	2404	1305	2553	3610	6604	1830	2376	1408	1704	2436	2233	1189	1729	2524	3916	3220	2331	1283	1460	1273	2478	1315
244	-75	7	-20	-2	12	-8	23	32	0	-13	3	-1	13	66	35	-5	27	51	23	13	23	2	51	-40	51	8	6	0	48	27	33	-13	64	32	-12	-69	-37	27	-41	14	-2	25	11	5	42	-2	-76	-9	-16
245	-61	26	36	-71	-11	14	35	17	-49	3	94	120	-40	-62	6	-24	76	-32	-3	15	118	18	36	-4	23	40	29	36	36	-2	12	-2	-64	28	31	133	174	31	29	30	-1	-5	24	28	39	18	38	110	2
246	-69	-161	-140	-225	157	-8	47	-409	-380	-68	202	64	-224	165	-129	89	100	79	62	-194	-96	-78	41	33	-32	129	219	-325	-38	239	63	170	-8	-39	0	-250	-309	89	-119	160	30	-44	-142	-61	304	66	279	158	-214
247	-151	-52	-118	-143	-7	-55	-124	-155	-247	36	-22	-110	-57	487	110	142	-86	-33	-72	-73	930	132	-51	-80	-39	-190	76	-79	-45	31	-67	-29	41	-111	-9	-57	94	-43	-232	35	-67	-49	4	224	-47	-118	139	16	-57
248	163	176	133	93	75	163	-8	94	204	149	152	304	61	141	62	22	100	100	72	128	54	56	170	134	327	105	170	164	187	389	138	42	82	-18	120	-106	137	264	159	185	111	173	409	241	142	38	30	225	252
249	644	754	794	598	1458	456	478	443	508	289	595	165	659	527	653	583	725	401	384	1563	136	234	271	882	368	431	740	238	346	439	714	1026	534	718	242	314	306	238	272	367	587	936	833	498	634	396	310	564	384
250	663	601	848	526	341	334	379	497	528	461	381	461	321	424	204	385	452	324	331	487	158	452	313	308	313	407	491	547	379	286	432	398	646	111	293	226	284	259	208	404	457	295	468	553	337	533	338	597	367
251	53	-33	114	-403	-105	0	43	50	74	163	94	-77	270	69	94	157	40	-114	194	-26	22	130	11	93	69	194	-569	-21	-282	311	-84	82	-306	48	-26	-111	-155	101	51	-12	131	150	237	129	-57	172	-114	183	139
252	613	1487	810	453	1146	384	1560	842	794	516	829	799	1238	311	827	1243	534	394	2617	2237	1506	915	286	419	811	884	819	473	355	2517	485	630	1161	432	593	157	669	2099	1188	1237	1107	1856	2393	1171	571	520	477	704	622
253	338	425	759	805	3135	122	2470	203	826	632	603	339	1750	449	4655	839	716	1379	1124	3462	1649	70	9	2622	229	295	391	369	178	593	628	2613	320	1444	468	456	534	833	117	255	654	692	1168	238	541	275	767	712	642
254	14	45	84	20	52	23	26	104	89	0	0	84	11	-18	43	49	19	45	41	96	57	30	28	98	25	60	161	41	133	77	-21	92	5	29	88	29	129	53	-38	70	30	43	2	80	72	43	94	81	100
255	874	344	903	690	904	380	707	479	468	373	598	685	581	805	417	480	315	830	655	384	429	383	248	796	488	757	614	407	869	775	369	795	752	349	499	283	527	460	586	623	565	722	868	380	304	494	449	729	730
256	-221	-32	-640	-82	80	-259	43	-524	-429	-155	-423	126	-238	-144	-105	-137	5	-45	100	355	-183	-422	-433	-2	27	-61	-187	-393	-7	15	-254	-219	-662	-23	-21	-259	-431	2	-204	-7	-253	327	36	-9	-34	-141	-2	-161	-199
257	362	503	383	252	687	206	273	-44	663	213	289	211	747	372	535	296	286	286	89	647	553	88	-9	378	123	125	153	190	213	363	58	618	195	377	132	416	109	547	85	85	221	648	458	239	262	236	188	199	375
258	-53	14	-29	-61	39	-23	-31	-70	99	79	34	-68	62	-13	-10	-22	47	-29	18	34	56	3	-79	53	43	-10	-71	89	33	-23	90	33	-74	14	72	50	81	56	-15	12	37	-1	48	10	-27	10	-66	92	209
259	906	708	388	521	690	300	942	305	764	279	365	797	2261	331	471	457	1261	251	727	1731	469	238	286	946	437	505	-46	-19	226	770	874	2058	460	516	413	465	844	1211	21	602	651	2181	1370	716	748	589	1352	1613	928
260	92	-63	23	224	69	-69	835	73	-44	-13	-12	-5	1	-22	49	-17	-17	60	24	101	122	30	28	524	-17	-5	6	79	-73	-20	-6	126	34	165	84	32	-37	-49	-41	-3	-19	76	12	32	-37	-25	-83	56	-60
261	2452	3874	3827	3429	3758	3289	2809	3037	4866	2847	3456	2914	3928	3485	3333	3205	5436	1911	1913	7819	8736	1812	2127	3533	2432	1435	2617	1494	2491	2939	2719	3794	2967	2442	1877	2981	2123	1621	2688	1003	1305	4596	1916	1434	1263	1794	2722	2487	1885
262	952	2426	1660	1274	1192	1452	1095	1196	1568	734	811	1063	1061	766	1285	862	1483	489	728	1428	645	863	748	1048	757	1023	1236	1837	1245	1493	790	2283	1920	868	2059	1549	1223	885	849	820	705	1067	1123	179	644	999	910	721	533
263	-977	-771	-959	-608	-333	-837	-566	104	-677	-779	-594	-666	-614	-426	-505	-753	-755	-540	-439	-541	-141	-742	-813	-461	-748	-380	-760	-999	-475	-248	-617	-884	-1125	-330	-336	-401	-94	-456	-312	-593	-661	-206	-407	-271	-259	-847	-604	-1092	-863
264	204	573	281	769	40	419	561	479	878	163	567	250	55	441	483	213	821	304	244	286	72	336	634	122	219	143	818	502	243	13	113	54	1273	435	338	148	-276	362	744	246	162	524	25	284	374	164	627	171	500
265	-136	-174	-180	-167	70	-26	-247	-190	-225	-131	-148	-99	-131	-28	-65	-158	14	-62	-77	-112	-104	-77	-161	-169	-42	-91	-139	-265	-251	-116	-96	-122	-54	-62	-88	-286	63	-46	-77	-5	-23	-111	-102	-47	-99	-79	48	-83	-163
266	88	-30	145	136	-29	8	70	245	72	88	40	96	102	132	79	-5	178	65	3	104	18	78	98	97	-8	62	165	14	45	-4	-31	96	101	28	-81	-226	-150	37	66	126	131	107	83	8	132	115	-127	162	-413
267	134	56	207	19	6	0	18	179	92	31	27	11	3	32	9	-602	61	46	-34	-6	17	24	159	-2	38	68	225	7	-13	-26	42	46	148	-187	79	-68	-27	-1	63	117	38	76	62	69	-7	64	48	-13	12
268	-1129	-1172	-1406	-1960	-696	-1362	-1732	-1743	-1173	-672	-965	-1166	-649	-1240	-902	-1063	-1342	-627	-866	-699	-552	-1177	-1274	-821	-1084	-482	-2373	-1332	-898	-1041	-380	-1022	-1749	-497	-569	-591	-1008	-727	-761	-703	-734	-1109	-606	-669	-679	-875	-447	-856	-959
269	-117	-82	-125	-116	-67	30	-58	-74	-89	-44	-101	-50	-23	-12	-77	-48	-84	-176	-89	-70	-77	-31	-64	-10	-47	-56	-129	-24	-49	-45	-94	-65	-78	-20	-64	-136	-129	-50	3	-25	-89	-12	-49	-24	-124	41	53	10	-7
270	-165	76	-263	-9	42	-254	-218	-223	-185	26	-67	8	147	0	256	99	152	-22	95	379	443	-10	-150	100	134	-5	-114	-207	-19	87	96	119	9	39	60	-5	40	-34	-78	209	590	240	304	148	-154	-208	38	91	50
271	-594	-268	-630	-21	-81	-307	-243	-925	-271	-298	-428	-135	-258	-373	-204	-349	-252	-254	-145	221	-188	-150	-535	-402	-283	-382	-699	-572	136	-312	-84	122	-635	-278	-216	-219	0	-255	-284	-49	-367	-64	-354	-205	-142	-206	-221	-120	-341
272	-41	-13	-144	-240	26	19	-87	137	295	45	-4	10	106	59	62	0	27	72	1	186	131	66	83	141	48	28	-75	388	117	-5	90	218	136	-37	40	600	586	369	78	24	33	107	7	128	134	12	58	130	127
273	148	331	1069	750	617	725	1124	890	901	548	469	60	382	424	557	636	329	490	147	-107	353	589	469	854	407	573	262	1163	389	746	321	613	1054	200	531	351	709	96	-41	419	761	493	425	508	651	563	338	966	738
274	557	512	1085	643	382	264	507	565	425	409	645	314	539	466	341	608	672	502	351	489	22	698	309	786	421	482	776	523	-174	405	357	630	1383	225	74	272	-125	278	180	454	398	210	587	408	409	530	452	652	132
275	1121	1656	2358	849	769	1228	934	298	2394	1932	460	206	1798	755	730	304	2498	1599	339	859	101	377	408	1116	274	375	866	1945	379	1779	1561	1692	491	1742	819	2793	1684	1064	239	119	801	611	140	189	1700	1145	2226	82	454
276	959	310	1210	914	697	689	1356	890	815	467	540	501	728	713	603	402	1033	662	564	899	436	483	364	756	343	417	600	557	613	290	439	850	970	515	538	619	378	467	368	652	502	916	1168	534	514	834	620	861	675
277	171	224	371	76	340	151	194	26	299	163	176	120	332	290	133	318	527	87	177	649	353	85	113	289	76	139	242	-12	200	248	275	338	165	190	69	93	196	67	91	191	219	552	302	243	79	69	88	147	134
278	25	-1	58	310	61	-277	245	149	-222	66	-16	-5	174	-55	-52	99	161	179	109	365	158	-90	-125	185	82	82	-175	21	13	-66	258	87	-96	-28	45	-57	-121	-41	-145	30	-18	164	230	-269	57	108	-30	280	139
279	-601	-722	-806	-646	-371	-453	-551	-940	-655	-466	-551	-412	-537	-606	-351	-611	-533	-507	-488	-951	-408	-631	-416	-490	-614	-632	-1046	-487	-597	-706	-525	-703	-863	-363	-581	-216	-291	-252	-143	-415	-591	-538	-508	-423	-601	-571	-414	-493	-651
280	-90	-70	-135	-224	-130	-133	-258	-86	-160	-45	-170	-94	-24	-142	-47	-120	-220	-81	91	46	-43	-102	-119	-97	-186	0	-167	147	-215	-95	-50	-189	-300	-98	-247	32	8	118	0	-99	-195	-47	-43	87	77	-56	-33	-80	-259
281	-125	-83	-151	-52	618	-40	-68	88	-65	-19	-14	-57	-34	-34	578	-40	-98	-73	-53	497	-29	-22	-93	-155	-2	-104	-75	-14	-27	6	73	36	-47	-45	-105	-51	-111	115	-44	-42	-110	-52	-60	-19	-12	10	-81	-2	-74
282	1400	616	833	1402	1501	286	1529	4601	2108	413	1391	265	2428	1044	1709	2065	1200	1254	1670	15646	970	358	248	1577	207	1422	1669	243	1424	1126	1084	3784	1428	1169	1235	932	829	1015	637	366	618	2011	2153	780	671	6715	1276	916	730
283	7819	10357	12527	7693	10766	6572	7216	10210	17588	14289	9554	7264	5249	7918	4418	5187	8462	4258	3385	7334	1779	4889	4153	7131	3951	5371	6020	5305	6652	5790	4284	3303	12104	5017	1913	1885	4853	2994	5873	5244	6221	11461	7875	8431	5522	4830	4478	13146	6658
284	122	227	272	46	449	51	124	52	539	186	329	58	544	339	281	216	145	-1	187	1398	553	-7	150	298	29	41	267	57	58	125	231	246	223	327	-14	103	47	210	187	-5	166	506	811	138	177	36	20	87	156
285	50	-13	107	-20	17	48	26	160	69	27	81	-21	4	0	21	17	72	91	10	23	69	-19	30	40	59	73	39	132	16	-44	107	48	160	-76	21	-51	-202	1	-23	18	109	-30	80	76	-7	41	94	62	-16
286	73	85	0	-17	-24	-16	-26	85	-37	4	12	-10	79	28	-18	100	-3	116	13	58	-78	-15	-47	129	27	-1	198	130	-35	31	86	9	-38	67	67	-57	-77	4	-100	144	86	82	88	54	2	-113	76	-41	-86
287	99	77	84	174	127	145	169	241	159	27	93	47	101	125	144	157	239	108	128	224	111	39	132	140	99	92	139	140	117	62	128	156	196	100	84	96	150	96	51	90	90	132	119	83	172	100	200	105	9
288	304	705	569	372	507	528	441	577	741	346	657	237	631	446	541	487	1051	309	305	1528	1882	266	288	638	198	356	441	412	426	416	468	685	708	541	401	489	403	340	448	399	315	859	548	344	267	445	175	381	259
289	554	663	670	752	1007	718	789	836	999	739	927	505	883	732	847	446	1923	570	475	1132	887	600	1575	696	665	613	826	398	588	1356	878	1514	1158	1158	627	720	1277	1205	945	333	365	1501	1168	276	776	164	460	469	464
290	-109	-33	-102	-152	-119	-67	-208	-229	-86	-95	-83	-34	-76	-130	-95	-191	-68	-153	-94	-171	-178	-149	-165	-122	-208	-104	-236	-101	-130	-143	-111	-76	-336	-118	100	-103	-100	-18	-29	-102	-121	-92	-88	-100	-94	-157	-88	-98	-110
291	10477	18420	11507	17843	19284	12474	10328	10468	17887	16525	18265	14053	14446	18704	17603	18122	16798	15542	15496	23144	15370	11729	13888	17535	14790	12742	15657	11541	12003	12489	14407	15324	12658	20619	14193	17933	18328	13896	15569	16458	13370	17739	16880	12094	14007	13312	7943	18584	10637
292	1743	2941	2610	1974	2380	1872	1240	1863	3288	1914	1856	1300	3091	1451	1996	1676	3238	1221	1027	4157	1611	791	1322	1661	1438	1500	721	1897	1285	1479	1891	3997	1893	1546	983	1848	1520	1439	983	1220	1606	1958	2420	611	1550	1174	1230	1963	1411
293	3617	2103	2419	2573	1983	1925	2407	2743	2037	1490	1545	1523	3525	1638	2487	1458	3099	1347	1582	2966	2318	1785	1607	2634	2501	3545	2465	2819	2037	2188	1723	6308	3391	2426	1906	2867	1800	3487	1598	1715	2182	2067	4377	802	1632	2518	2554	2249	1714
294	-26	-144	-38	-95	-69	-67	0	-226	-154	-192	-82	-64	142	-135	24	-367	-107	7	-27	-81	-86	-128	-51	-23	-31	-145	-336	-38	-67	-136	-60	110	-88	142	38	-93	-31	5	-20	-33	-27	-145	9	-13	-94	-87	-50	-198	-60
295	1023	714	1296	1648	655	1397	1187	1542	765	710	767	1268	830	456	946	1276	2359	647	999	2117	2050	268	1196	1286	637	881	1646	1573	650	973	760	1027	1953	782	1048	812	1469	1074	1228	1436	830	986	943	679	1722	1583	777	1393	952
296	288	436	736	320	1409	-94	730	634	307	265	230	270	214	592	822	1165	703	399	468	262	58	452	229	835	393	252	-3	799	626	363	479	392	-106	846	492	-60	501	50	20	198	230	489	328	265	948	718	310	949	565
297	327	239	169	619	643	392	315	230	589	381	189	280	227	599	604	327	305	332	377	1097	329	428	378	456	256	435	26	330	99	152	447	449	527	538	269	391	453	479	371	367	397	251	731	283	524	159	147	403	221
298	460	285	492	375	278	231	457	323	309	315	296	109	270	277	236	364	546	402	213	596	274	360	303	547	286	404	650	482	288	236	172	330	749	136	182	210	212	86	29	285	423	222	328	238	424	203	228	485	425
299	1148	507	1002	1312	1538	622	835	428	1901	274	1288	426	1249	558	1505	759	1010	268	802	2709	1987	732	782	1616	294	665	427	323	406	450	1491	1554	434	1482	733	960	987	207	211	460	1266	1547	648	877	599	290	310	416	452
300	469	321	601	537	395	211	653	514	431	479	274	140	573	375	331	369	885	435	526	1038	358	388	419	666	361	440	602	668	576	374	573	538	594	377	271	179	419	399	108	313	438	425	411	346	394	427	124	580	593
301	132	209	77	207	134	26	58	250	411	-64	280	242	80	221	310	73	188	30	184	271	102	81	326	333	299	366	398	181	499	167	296	99	384	97	221	-94	-128	-54	83	250	174	180	228	218	-24	2	63	69	45
302	-146	377	153	224	1714	190	184	-101	1172	-13	655	-33	189	920	525	268	481	302	147	924	39	-81	269	380	206	-21	-143	-207	671	-94	182	-286	-129	574	-40	44	104	157	20	69	191	1072	423	62	329	25	241	-26	223
303	61	247	238	160	355	74	403	97	277	125	169	142	433	849	297	168	424	124	92	392	116	-22	121	711	161	213	43	-79	174	208	214	421	151	450	242	-34	157	316	136	142	101	959	498	282	149	234	274	262	218
304	519	15	144	458	29	279	250	52	83	83	127	-84	4	-14	-16	148	-20	21	3	-27	269	53	41	288	28	5	79	50	-10	11	-2	75	180	1	329	-118	108	-72	78	59	27	60	-10	189	109	146	223	-50	302
305	797	768	1057	505	584	391	742	685	678	426	893	311	494	720	506	124	557	295	189	427	787	133	271	777	498	422	896	627	522	622	340	812	1010	43	456	-29	370	41	80	347	258	522	354	540	334	254	142	700	533
306	-63	-14	-75	-10	226	158	-35	-140	73	-65	64	-86	195	-11	231	92	110	86	135	216	113	-87	-89	230	-40	28	-97	-70	-60	9	105	231	2	330	19	35	-4	21	-30	17	-7	283	0	12	102	15	81	-158	-50
307	461	171	208	241	218	151	373	161	206	175	98	148	508	207	190	340	334	281	102	445	166	143	89	274	100	99	370	280	172	150	289	383	330	195	247	90	82	197	122	141	155	224	327	76	199	262	12	86	31
308	3355	3872	3932	2423	3716	1744	3103	2257	5136	2823	5321	2085	3968	3051	3162	3231	3340	2861	3105	8467	7855	4116	2260	4436	2227	2563	2417	3314	1950	5350	3158	3943	3081	2811	2331	2552	1902	1901	1949	4656	4824	4591	4165	4100	2466	2304	2160	3171	1779
309	295	258	312	266	231	140	258	211	431	82	234	107	666	278	361	375	308	92	249	550	206	273	197	466	106	183	186	202	162	165	275	659	341	173	242	167	138	41	92	234	267	235	341	181	122	378	223	231	141
310	-31	-8	-20	-104	78	192	-43	-7	24	-154	-19	-94	-28	32	0	-6	33	47	149	-4	33	-35	66	-70	-21	66	-145	-21	-20	-67	65	73	-309	-156	-84	1	75	-93	-13	53	163	-87	-15	-20	72	64	-99	-125	-74
311	-303	-165	-294	-244	-141	-174	-329	-262	-331	-140	-249	-264	-141	-165	-226	-262	-89	-175	-187	-207	-148	-283	-387	-233	-238	-197	-281	-212	-221	-110	-98	-264	-507	-147	-209	-211	-182	-144	-173	-158	-186	-128	-244	-145	-52	-100	-116	-115	-216
312	825	660	1145	824	811	456	1159	1380	955	721	373	776	813	550	339	742	714	718	1179	1290	213	580	587	742	1217	538	1012	456	513	4844	945	1295	904	677	5266	386	376	703	761	619	477	1126	970	370	978	715	823	1164	2664
313	-116	-59	-133	-103	1	24	-63	-94	-24	-70	-35	-38	-74	-80	-58	-30	-22	-58	-39	-8	-39	-112	-49	-6	14	-80	-153	-98	-20	-74	-77	-24	-266	-15	48	-223	-184	-5	-58	-38	-39	-55	-106	-34	17	-133	-104	-34	-36
314	-505	108	205	226	204	152	157	242	150	129	247	63	281	119	189	93	255	230	77	210	92	146	153	153	98	144	203	181	115	206	268	217	190	244	120	203	156	127	60	77	115	133	96	74	262	74	122	229	113
315	924	726	886	595	682	821	386	1100	725	390	555	502	804	1031	939	499	962	399	381	1623	396	914	549	862	833	1058	430	313	582	818	617	654	968	756	374	804	535	915	354	690	547	918	660	482	479	646	584	758	699
316	54	-51	20	-29	34	16	-33	53	53	-30	-8	10	-10	8	2	-18	52	-27	-28	-31	3	-27	-5	-39	56	29	-73	-12	26	8	170	-2	22	21	-31	-105	-65	17	-32	0	-1	-10	2	-54	87	-100	-2	5	36
317	175	142	141	106	62	154	99	226	169	101	74	77	74	132	105	87	190	47	102	227	56	99	163	135	150	153	81	193	172	-2	189	100	112	56	45	56	184	5	143	95	61	78	82	65	107	79	134	206	74
318	-68	29	-15	-8	8	-1	6	38	33	62	9	-10	-31	2	-41	9	66	24	40	1	13	18	58	-28	10	8	23	-70	43	20	54	27	-35	-23	-14	38	47	-17	0	44	75	9	33	16	-37	48	0	2	21
319	-49	-17	79	-47	-8	-103	-58	71	43	86	43	-35	48	107	-15	-1	105	55	6	-16	302	41	32	145	-36	111	-204	144	23	2	126	111	96	90	60	35	25	-28	95	101	111	-39	-49	-25	-2	59	48	173	175
320	-32	13	13	-7	-51	-71	15	77	35	-15	3	-7	-26	12	-15	-67	143	35	-14	-15	96	-73	-72	59	-28	32	6	33	-27	16	56	20	-29	97	31	-54	-20	5	18	3	21	-21	34	0	12	144	7	-7	-19
321	233	486	234	62	212	135	139	232	349	193	159	456	533	374	452	188	121	233	129	393	529	311	245	106	275	383	337	318	376	233	329	276	319	134	57	174	386	378	108	358	306	81	634	440	112	355	386	1136	317
322	1226	2185	2636	2217	2273	1940	1483	1710	3019	2021	2282	1457	2670	1543	3037	2572	2263	1404	2421	4399	2090	1313	1459	1806	1374	2262	1924	1764	1693	1657	2399	3141	2299	1936	1560	2769	1059	1656	1468	849	1718	2390	2282	1483	1642	1272	2043	1583	1103
323	1703	2474	4609	2396	2610	3255	1969	1812	4808	2385	3764	1740	1416	2555	2702	1561	3059	1555	1233	3004	1684	1115	2196	1977	1128	1705	1735	1537	1856	1072	1410	2953	2265	1862	1197	2539	1314	1182	1181	746	997	2368	1205	1095	1452	1431	981	1638	1320
324	1647	2361	2667	2162	2867	1484	1586	1368	3509	1239	2893	1406	1421	2277	3015	1484	1512	1845	1074	3505	1059	1305	1367	1466	1475	1446	1725	1204	954	1578	1191	2029	2193	1566	1115	1435	1792	1012	1830	1022	1147	2865	1995	842	1033	911	836	1242	827
325	425	271	513	468	290	314	460	379	489	234	345	250	206	251	251	263	395	282	234	239	221	449	108	330	287	297	658	707	439	192	172	326	642	126	149	228	137	129	131	218	274	161	281	207	162	221	210	379	315
326	225	490	390	387	347	218	411	235	379	206	384	188	569	412	796	212	394	165	194	1061	2102	672	218	572	178	390	278	342	499	438	111	884	391	399	218	246	31	366	247	311	402	742	525	451	309	345	152	512	278
327	1169	1078	1337	1258	702	1017	959	1034	1151	555	711	773	653	710	689	808	1151	640	725	941	387	1008	729	511	789	472	1314	586	1124	633	930	830	1148	535	670	504	256	583	326	778	434	647	333	547	586	728	704	457	622
328	538	572	830	768	1610	232	699	610	605	442	213	205	1030	386	1127	459	990	490	710	3732	87	125	518	817	1161	1054	327	378	638	601	1912	1838	638	605	454	468	1658	1107	293	542	651	1536	1482	910	666	594	841	804	807
329	122	149	217	224	751	174	154	80	498	148	102	139	109	74	212	89	168	130	199	101	37	51	132	192	139	114	275	120	207	208	138	164	179	131	0	65	256	132	63	119	121	560	384	87	97	218	25	115	64
330	263	469	604	192	654	131	243	95	534	192	397	119	165	316	366	417	243	154	114	636	26	15	186	383	100	34	56	284	1	170	157	345	91	118	48	252	114	242	119	313	243	420	405	121	162	92	-63	119	43
331	2335	1967	3338	2233	2092	2076	2325	1581	3002	1381	1989	1250	1556	1278	1891	1453	2223	927	1051	2844	850	1313	1347	2226	1146	841	1707	1612	1522	1715	1494	1751	2300	1205	1576	2210	1262	1524	914	1121	1349	3612	2193	1054	978	1609	1034	1672	1380
332	1640	2224	3525	1565	3979	1900	1535	1048	4215	2177	1586	1488	1728	1253	2968	1467	1625	945	1302	3600	-41	1109	930	2215	1098	811	829	2575	401	3249	1307	2547	1344	1617	1240	2898	2759	3437	1150	1521	1389	3237	4919	1554	833	890	1110	750	348
333	815	906	1007	759	1117	403	850	1049	988	385	569	350	872	736	803	718	1200	770	705	2881	612	795	362	799	414	563	383	475	553	847	869	2165	716	258	600	487	482	472	382	463	589	1412	990	758	332	512	488	942	372
334	361	387	434	196	161	163	265	340	355	157	324	176	133	140	88	198	175	172	86	304	179	133	134	389	189	205	497	202	11	215	123	178	558	93	86	38	108	151	18	177	257	66	151	216	134	218	162	306	161
335	352	102	240	112	127	177	63	161	36	62	185	113	121	233	145	150	97	114	-12	104	148	235	102	193	153	153	228	118	289	128	229	125	129	68	74	8	29	70	44	50	167	42	267	69	-39	133	71	259	315
336	427	349	563	298	352	222	483	296	506	303	375	68	610	370	342	395	324	229	277	648	206	248	132	611	155	322	530	369	276	438	334	377	497	306	177	102	63	242	35	282	337	365	402	399	254	352	259	436	365
337	481	-192	443	516	1108	277	216	-22	1157	200	643	455	648	478	544	264	-106	24	152	1168	86	-70	336	837	77	102	-183	9	298	197	369	504	-168	605	98	160	48	532	465	268	451	1029	726	-31	566	226	119	240	278
338	491	821	1098	332	292	305	475	412	615	410	437	212	399	334	237	476	392	249	282	2654	352	204	398	467	1020	338	384	429	445	365	1134	553	601	206	269	180	189	492	171	664	449	369	960	974	232	368	381	461	557
339	1944	1598	2837	2300	1766	2220	2349	2064	2472	1555	1590	1708	1775	1576	1657	1453	893	1024	1369	2461	980	1311	1759	1584	1240	1590	1511	2317	2602	1388	1178	3438	2153	1421	1740	2146	1122	2015	1655	1592	1115	2406	2683	1449	1765	1320	2292	1178	1356
340	566	524	682	559	342	348	614	1107	707	473	447	245	693	401	422	539	241	475	345	979	473	323	368	729	351	275	567	765	499	335	397	760	720	350	322	495	417	434	392	521	527	470	888	437	319	478	388	1067	829
341	253	112	237	154	314	140	174	208	212	35	184	71	216	309	287	220	439	138	133	744	152	-2	9	514	88	24	190	98	146	103	266	310	79	242	170	127	95	180	112	77	85	422	239	28	114	172	111	129	127
342	438	658	269	807	823	158	467	250	431	-38	174	145	334	529	1346	819	1359	522	155	959	127	-13	-28	1060	220	279	-6	306	245	-178	558	462	64	1335	-28	456	575	277	207	313	107	1066	527	470	172	306	350	282	60
343	633	998	895	928	1665	762	887	461	1980	737	1292	773	1286	1108	1389	1476	2772	926	768	2723	-54	375	524	1131	708	662	669	726	594	760	1168	1262	1047	900	329	1006	1087	922	648	629	813	1494	1096	932	641	772	688	1413	625
344	101	479	145	169	340	227	62	110	49	-91	427	14	509	899	514	14	308	-48	171	911	433	-28	83	601	157	163	-294	168	367	153	247	819	-44	313	105	161	-38	233	-99	202	301	297	336	148	-49	69	-2	169	64
345	-19	-37	46	57	-14	62	57	100	17	76	85	44	60	83	-27	72	3	27	-36	-17	66	43	58	100	25	87	162	55	90	74	-94	19	148	54	-129	-77	-88	-8	-7	-46	49	0	-11	49	-7	90	88	13	40
346	-53	44	88	-50	23	-81	-78	-20	44	73	20	-12	8	33	1	-196	-33	19	6	20	-43	-32	-51	-32	39	1	109	94	114	-15	67	-44	122	-42	-74	57	-46	46	-32	28	18	68	37	-13	-114	84	66	40	-28
347	1199	1002	1758	1398	855	1225	1193	2143	1366	969	918	925	1136	989	945	1282	2139	1017	1088	1374	779	1350	1157	1025	938	782	1851	1129	1447	924	676	1363	2220	1020	550	847	1058	268	708	661	797	999	874	595	1006	1398	704	1442	1274
348	155	183	86	179	142	144	139	308	84	78	93	110	100	188	147	354	374	86	120	398	188	122	83	207	124	131	87	149	193	91	235	294	262	126	137	102	70	60	77	60	159	200	136	167	27	193	25	128	86
349	-215	18	-276	-125	69	-12	-199	-461	7	-123	26	-109	38	201	51	-104	-375	-1	-137	22	-23	-200	-134	0	-83	-95	-295	-226	-245	-264	-130	-28	-645	45	-96	94	63	56	-146	-119	-94	-75	187	25	-162	-309	63	-337	-197
350	967	1162	1456	1170	863	976	1014	1439	1201	734	965	682	884	956	795	1061	1145	758	737	1234	1153	982	704	1148	981	1266	1254	1187	1155	653	1094	924	1870	618	552	501	490	398	409	732	1193	820	868	906	828	1032	627	1323	1195
351	512	256	744	541	374	360	416	518	559	271	399	153	459	254	321	336	472	314	248	207	31	598	450	289	265	226	583	521	426	241	292	310	639	131	64	364	358	399	385	248	378	422	471	269	414	375	188	259	310
352	181	91	167	144	306	33	152	116	57	36	144	76	214	136	303	80	204	79	94	192	-21	18	94	154	28	83	100	156	70	80	48	164	35	100	86	108	98	197	103	147	35	250	276	84	49	-18	27	-30	-24
353	3025	6944	3739	3762	5734	2825	4392	2115	4837	4608	1799	2003	5290	3831	4018	3965	6768	2415	3437	12466	7738	3355	2447	5139	5412	2510	1154	5798	3626	4436	4148	9660	2203	3591	3064	3523	5868	4143	4320	5923	5003	7897	7311	3004	2224	2255	2269	4565	2142
354	236	413	604	658	16	560	530	266	741	61	511	143	141	415	233	102	117	347	73	-61	257	292	501	326	153	192	424	446	177	175	193	229	363	183	295	126	166	134	357	211	198	231	285	241	202	198	353	74	447
355	295	437	17	46	577	-1	149	-68	371	22	540	93	361	464	497	59	-55	1052	406	944	414	99	-37	560	9	860	-236	120	7	291	285	291	55	283	180	256	170	242	218	325	381	1162	1007	1167	-4	108	43	262	-21
356	49	197	189	136	125	120	1	76	299	160	87	63	87	292	83	135	33	76	69	412	109	94	176	135	49	108	-15	147	238	165	197	162	121	104	60	54	58	69	35	128	43	45	162	170	159	64	94	55	144
357	1676	3390	3503	1607	1118	2493	1283	1118	3214	1700	1523	984	1610	2958	938	1447	1853	1704	951	1568	778	822	2378	1134	1170	1431	1159	1310	1159	1140	1136	1221	1772	748	985	1270	844	1454	1133	1599	1457	1703	1904	1613	1373	1975	3032	2457	1959
358	188	196	206	180	153	90	216	310	150	178	67	132	727	122	93	106	53	55	905	210	307	138	108	218	95	131	215	125	303	185	136	106	309	172	33	-37	-12	317	148	512	155	1145	362	92	157	113	203	117	86
359	166	-1	37	151	121	19	208	328	100	64	127	-169	350	110	73	182	92	250	160	117	183	401	41	59	-109	248	192	67	292	48	-31	413	344	208	16	54	144	28	103	-56	182	409	112	91	92	242	193	86	288
360	179	-32	66	28	61	24	-57	-34	-74	-62	34	0	228	185	75	121	112	7	-16	340	312	100	72	90	89	45	-78	-12	2	62	63	299	-8	95	117	-204	-7	142	81	34	126	171	200	13	-69	-33	114	-14	76
361	-719	-1723	-1808	-722	513	-1194	-1327	-1761	-572	-1126	-985	-1010	379	-843	491	366	-732	-157	327	1663	-252	-1561	-860	990	-579	661	-2655	514	-282	-149	811	17	-2299	430	903	59	-566	-599	-542	-599	175	260	684	429	329	213	833	-1306	-1108
362	709	687	1337	974	567	725	994	994	944	740	646	646	393	549	505	925	510	440	635	906	730	736	892	581	636	480	1334	1141	367	810	752	511	1515	452	365	434	519	503	430	600	561	627	660	502	863	507	551	535	538
363	654	675	857	565	334	473	505	544	766	708	289	132	468	431	238	451	616	412	356	925	336	470	332	466	206	473	413	615	152	535	489	172	753	192	317	330	54	356	139	541	610	422	516	313	327	478	482	462	370
364	3186	3686	4189	2505	3069	1779	2762	2697	4245	1867	4202	1951	3975	3032	3275	2821	2546	1411	2639	7299	7439	3566	2443	4330	1691	3037	1977	2071	1910	3170	2317	4151	2290	2318	1802	2524	1479	1778	1330	3612	3835	3426	5550	6004	1792	1774	2445	3150	1599
365	139	71	128	78	59	80	102	76	63	60	77	51	84	49	12	73	41	100	10	44	21	79	115	91	64	77	107	108	93	34	86	93	99	-4	2	41	34	38	18	58	46	37	67	69	57	77	33	70	117
366	508	318	1090	344	188	250	359	514	437	425	197	179	320	497	215	383	188	274	164	405	179	292	305	350	220	328	481	432	147	95	229	309	749	165	139	211	132	216	173	305	301	213	323	91	282	494	142	378	214
367	-111	-59	-77	-21	13	44	-117	80	-40	-54	-69	20	-83	-123	20	-16	25	-109	-36	-7	-4	-47	163	77	-9	-83	-3	-86	96	17	-79	-141	-206	32	-45	62	97	54	-27	-29	-121	5	-57	-10	-147	-144	-17	-52	-81
368	2060	1604	2030	2386	890	2133	2760	2403	2235	1599	1644	1438	1098	1640	1307	1948	2450	1119	1222	1964	954	2267	1991	1097	1570	1117	2057	1520	1301	1302	1407	1462	2832	1185	1151	845	1783	968	1478	1701	997	1758	1084	923	1233	1519	1362	2587	2147
369	444	1085	1635	304	681	1194	120	223	4168	769	1025	834	900	1004	987	1934	802	218	1178	859	874	804	1284	654	1279	921	-9	176	1311	605	874	908	816	435	961	318	759	424	575	1804	550	-35	1057	3053	39	422	378	490	274
370	716	1939	780	653	484	736	912	667	1265	800	1213	889	663	603	314	596	864	458	745	891	875	748	623	610	1101	739	960	1226	1023	956	613	595	893	555	675	696	766	698	479	968	1377	424	713	1239	406	728	495	836	675
371	569	663	599	1243	1515	295	646	454	1065	888	717	254	2122	698	1479	854	1670	1132	724	2920	1399	591	438	728	494	654	560	465	346	1531	1466	2081	461	1703	1622	1771	1166	521	727	613	1097	1217	1021	479	634	1174	780	676	346
372	-76	-219	-323	-69	-15	-90	-273	-88	-160	-275	-17	-176	431	-135	71	26	-36	-140	-59	229	-32	-137	-182	-155	-168	-93	-283	-284	-237	-127	-75	259	-373	-82	-115	-17	-132	-62	-176	-97	-6	-231	207	-43	-164	-113	-152	-339	-209
373	151	148	115	218	238	199	270	194	283	108	38	129	231	213	102	81	309	233	45	213	338	311	102	239	50	158	272	275	450	197	140	141	535	-78	264	-50	123	298	47	-12	155	151	239	8	172	164	109	-63	264
374	239	412	218	269	307	170	204	289	278	60	381	56	832	196	531	530	635	79	212	834	774	283	144	479	101	97	248	292	80	247	224	737	153	399	266	260	105	186	71	153	434	492	323	208	112	206	119	256	105
375	653	2753	1408	1786	2318	1669	964	1782	2330	1558	2400	1245	1236	2506	2225	1587	2326	1208	856	3789	1391	1114	1162	2339	1051	1571	1182	1040	1395	1179	1304	1745	1752	1469	829	1277	1491	1234	1319	1474	1151	2503	1854	1271	978	803	533	1642	1021
376	874	551	986	1333	991	613	1120	1212	846	462	487	339	822	1252	1199	801	1638	513	433	1752	362	513	414	1383	607	563	877	842	906	261	722	1056	941	767	252	668	532	554	470	410	309	802	555	380	604	908	503	854	567
377	-87	316	-335	355	46	35	-62	232	116	258	-6	298	165	148	134	152	-149	-236	247	315	63	-108	-89	40	204	-48	-339	-106	197	116	-37	200	203	89	165	194	142	89	123	174	71	191	79	237	84	121	-17	-128	211
378	1031	787	1343	669	591	949	761	587	684	830	410	396	698	821	410	458	1348	714	457	1014	149	859	657	728	413	696	1561	1079	771	770	590	800	1849	477	490	225	341	313	358	723	839	427	495	384	541	563	518	1114	512
379	1530	536	1481	1431	1479	723	1063	974	1827	868	501	339	1337	885	1573	770	1765	1679	1055	1896	793	351	550	1362	880	1120	596	975	1081	356	1273	1380	1247	1100	932	1042	1006	659	329	635	497	979	1103	220	1105	1076	790	501	836
380	331	86	509	361	239	213	247	215	420	36	175	27	211	209	95	193	237	242	130	296	97	367	203	196	156	144	403	296	219	175	243	370	599	189	103	96	163	75	269	78	163	123	93	136	217	208	35	231	286
381	233	190	339	277	231	126	220	256	293	113	133	90	148	243	147	220	446	212	129	174	47	286	159	253	54	204	363	316	204	211	126	217	344	169	86	84	35	167	95	112	270	181	178	96	144	239	139	268	266
382	-34	4	28	109	-17	-33	23	-8	-96	4	-8	18	-88	-12	-9	43	-26	-1	12	8	-31	57	-18	-64	20	20	84	31	-96	-51	-14	-5	-79	-3	-24	-65	-23	4	-23	4	39	-20	-71	-25	-69	-28	-71	28	-28
383	-109	337	-9	1	130	234	544	287	-110	21	175	-165	-32	171	166	101	-33	-111	-9	323	43	425	269	-178	-240	-178	345	-161	352	266	100	-350	349	-17	-192	-13	-155	11	-112	239	-151	225	-204	220	149	-213	101	4	-103
384	2111	2956	4463	2651	2908	2429	2488	1629	4301	2103	2840	2062	1801	2220	2463	1744	1887	1803	1305	3404	797	1677	1844	2465	1538	1436	1555	1704	1660	2078	1223	2638	2020	1898	1627	2406	1706	1895	1573	1461	1519	3219	2486	1910	1423	1225	1156	1733	1334
385	1053	1595	1606	1105	1523	901	900	578	2142	1483	1952	891	1351	1034	1309	1103	755	537	810	3055	2056	889	780	1115	642	760	744	608	843	980	1109	2087	1139	1255	870	1409	770	746	802	849	805	1879	1060	1265	876	200	775	825	781
386	1279	1498	2355	1275	1735	1324	1356	1136	2683	2054	1006	1345	1148	1331	1798	834	833	712	977	2180	639	653	930	1410	976	604	956	1013	852	1142	1176	1110	1551	1695	745	2238	1161	1090	642	679	491	1296	884	583	1575	916	943	206	541
387	36	-952	-762	-512	-897	-270	-1576	-1187	-895	-689	-975	-1115	-496	-1000	-267	-692	-452	70	-545	-1794	-492	-1568	-75	-342	-636	-419	-1034	-748	-730	-1473	-651	-624	18	-255	-1824	-220	-512	-170	-784	-589	-507	-652	-506	-490	-539	-911	-732	-1190	-877
388	346	370	603	400	238	270	408	403	382	421	368	241	267	309	108	353	312	319	231	367	289	402	330	370	275	278	553	538	376	344	235	324	578	162	187	238	301	142	187	253	318	163	243	219	232	327	165	226	310
389	50	153	193	105	47	-170	36	-136	28	-3	58	-123	410	-70	38	133	-8	20	73	264	213	52	-49	149	59	256	-111	-238	114	-42	134	381	168	129	-57	121	408	59	77	139	49	178	97	57	-207	5	147	89	38
390	16	385	-79	-160	230	83	-117	26	161	51	56	610	50	-185	193	303	51	2	29	311	662	-81	34	513	402	802	175	275	-327	510	-50	-41	462	385	197	-2	-244	544	1421	660	785	968	774	-27	-57	-105	-91	207	-43
391	-73	-15	-180	24	63	-32	-38	13	-67	-14	-5	-61	14	-49	-54	-113	-85	-5	32	12	21	290	-100	55	3	74	-90	-135	-133	-16	37	18	-163	37	-81	31	-87	73	-12	-10	-6	-44	64	-62	-32	-28	-142	-167	38
392	-43	-26	38	-14	-32	-81	-55	-56	-12	-31	-18	-33	-22	-56	0	-43	-56	-26	-30	-35	-77	-90	-91	-42	-39	39	-54	12	-68	-38	12	-60	-118	-4	0	-47	4	-33	-49	-31	-19	-37	-6	-57	-72	-54	17	-94	16
393	75	174	258	140	192	80	67	271	273	120	124	43	122	193	151	157	130	83	68	537	59	133	79	194	77	134	223	168	106	109	48	190	146	56	28	112	196	115	80	155	178	188	350	175	104	87	144	206	144
394	-261	-277	-230	-56	-321	-165	-376	-394	-130	-169	-244	-166	-176	-214	-114	-172	-514	-114	-129	-126	-67	-311	-43	-275	-97	-186	-230	-354	191	-188	-193	-171	-485	-78	-127	-42	-142	-41	-111	-85	-154	-60	-123	-65	-42	-329	-155	-143	-79
395	-9	-32	34	11	-16	-55	-58	-37	-5	44	12	5	2	17	17	52	42	-1	38	56	-29	43	0	-19	-44	55	75	33	-20	-8	-56	20	38	1	81	-11	92	-37	23	14	43	27	26	5	-4	-61	-2	-21	2
396	280	631	339	357	498	218	253	310	428	202	650	224	221	342	495	332	566	249	250	819	423	419	239	351	253	165	381	415	212	457	254	159	253	309	391	398	391	140	227	340	619	478	591	632	219	265	127	736	264
397	13	5	83	102	99	17	-6	65	33	21	6	-18	76	76	73	-43	-2	91	119	52	163	435	-13	28	104	50	86	65	-79	-33	-56	44	27	148	153	0	8	-21	-55	51	11	119	35	69	-12	-25	101	-11	-28
398	296	839	304	459	470	289	270	515	469	123	394	102	727	223	282	278	1332	83	188	921	570	232	210	867	238	183	140	260	264	258	254	412	264	175	151	296	71	101	126	45	273	381	295	194	12	159	167	131	290
399	758	846	718	434	446	787	473	1266	970	577	503	431	329	744	384	710	691	872	465	726	603	821	482	847	589	708	1286	982	405	749	672	772	1314	466	444	613	221	373	583	571	701	176	633	389	604	800	363	1241	896
400	824	459	467	666	1116	540	799	284	1123	885	872	1000	987	1591	729	1797	881	380	1003	868	146	1188	1157	575	996	844	683	354	218	1136	624	1414	888	796	927	966	410	818	819	696	1094	810	791	498	352	1120	719	589	579
401	696	262	254	670	453	131	391	857	331	123	168	411	536	122	444	1330	465	368	317	971	4716	1224	264	678	175	394	1611	840	1052	363	302	758	1042	396	399	379	318	293	459	473	471	389	434	223	469	553	289	809	444
402	287	555	498	439	540	184	421	370	430	269	542	219	1240	629	525	371	1800	260	480	815	533	287	340	585	248	551	447	280	409	284	645	1594	388	623	432	465	431	330	236	213	566	452	523	693	164	468	221	703	466
403	516	958	1017	688	856	510	527	395	1488	873	1699	183	1334	861	665	518	1718	551	423	2163	559	406	702	927	269	375	267	490	319	1111	695	1045	394	840	480	815	789	345	361	521	889	767	813	502	371	229	99	423	262
404	170	102	180	328	257	133	184	149	81	152	305	103	359	370	479	272	413	140	327	889	735	272	138	149	128	97	109	176	98	176	300	650	173	419	358	293	136	258	122	251	339	456	382	189	59	177	216	261	163
405	335	112	246	285	256	247	226	-19	378	235	376	156	382	52	249	111	215	349	207	52	186	185	402	194	70	155	150	137	218	120	380	393	190	468	252	340	338	77	146	70	154	161	111	53	376	262	205	125	120
406	338	413	-157	387	504	288	146	74	253	201	607	-1	520	481	510	310	390	584	138	916	-143	41	165	455	106	478	-347	-74	49	193	340	380	-296	574	288	366	300	154	157	366	282	925	853	318	74	-100	353	-18	50
407	-105	337	-18	262	666	151	55	44	247	89	-42	34	-121	561	137	-125	150	11	81	-72	27	-62	39	277	-122	42	-112	48	174	4	6	-30	-163	100	418	-50	-171	-73	-116	3	-74	144	-86	494	79	121	203	-6	-48
408	-509	-284	-169	-514	-439	30	-262	-650	-223	-109	55	-375	-238	-311	-174	-300	-398	-313	-179	-498	-261	-309	7	-320	-371	-281	-715	-246	-856	-564	-216	-576	-847	104	-314	41	-513	-535	-411	-365	-401	-497	-416	-287	-94	-226	-216	-538	-1058
409	-190	-112	-44	-110	-66	-220	-191	-194	-113	-24	-95	-63	5	-79	-125	0	13	-23	-67	-4	11	-68	-62	-84	-19	-32	-239	-231	-114	-45	-67	18	-249	10	52	-69	81	-83	-51	17	-1	18	-1	-98	-22	-213	-38	-99	-149
410	250	-240	-266	-27	-52	33	55	-245	-143	-198	102	15	58	-111	-188	167	-83	-135	-114	-248	-194	132	66	144	-179	141	283	304	-152	-178	134	-169	274	56	-91	80	-9	43	58	-186	-211	59	-29	1	172	-278	279	-380	-242
411	824	536	986	789	1123	592	972	674	1356	609	684	517	828	526	590	641	1535	167	815	2409	309	440	492	1411	390	699	772	591	963	789	779	906	575	1037	663	760	585	655	510	451	595	1476	1333	654	202	775	780	1174	1098
412	2170	2558	1286	1909	1718	686	1831	1057	1239	855	787	1554	2608	1075	1291	1969	1698	4297	2638	2985	4587	2785	885	2362	1411	2099	1242	1532	1459	1501	1065	2419	1189	1253	2009	1089	1826	1799	802	1618	1823	4034	2195	2721	1370	1290	2582	932	692
413	-118	-63	77	-57	7	-168	23	-103	-74	-137	-94	-126	43	-107	7	-48	175	-22	21	4	-146	-43	7	33	-31	-57	-208	26	-165	20	-138	-84	-192	89	122	85	134	101	32	-76	-97	27	16	-133	-22	-56	-35	-76	-170
414	-50	3	52	-34	-18	-126	-10	-74	24	-61	-8	1	-38	15	-53	-44	-42	-30	-80	-69	-41	51	11	-18	6	38	-184	-28	-26	-6	-50	2	-58	3	91	-111	-29	-40	-38	-29	27	-17	13	-16	-69	-187	-124	-3	2
415	719	501	900	624	363	1004	925	815	778	365	548	448	442	460	297	457	537	390	421	417	414	618	613	565	434	380	804	572	838	431	317	535	849	486	694	504	239	242	426	218	303	406	393	302	366	509	401	661	769
416	330	210	320	213	291	85	354	277	246	160	122	152	333	259	218	330	320	127	228	449	194	190	226	303	113	223	215	195	366	170	220	368	282	134	168	-17	120	163	68	149	159	259	260	118	167	324	294	314	192
417	380	642	351	406	248	560	680	506	805	79	618	107	264	149	251	-31	518	2	-321	897	473	249	501	618	-283	58	-26	222	-13	-374	241	557	262	405	-271	561	163	317	61	308	223	392	202	226	37	391	22	304	331
418	192	16	172	207	247	190	304	127	347	101	185	77	414	85	338	201	463	401	230	1286	929	133	176	408	65	160	142	-152	131	215	386	740	145	262	137	211	256	183	26	65	147	437	595	228	59	208	155	78	310
419	9	27	114	28	19	-48	25	-1	39	78	32	11	103	21	54	18	84	-15	-48	131	39	5	32	116	25	41	45	-130	46	23	-37	229	-8	54	-7	-142	-35	18	13	37	22	76	102	34	62	92	48	18	2
420	104	227	166	6	192	44	120	92	199	143	373	34	258	100	91	45	180	19	121	527	328	92	72	209	48	107	93	-9	155	124	168	311	-12	137	115	-41	-21	4	69	224	315	169	279	280	4	139	106	139	84
421	-18	-36	-79	-7	28	12	-30	-5	-28	14	-17	28	-1	31	-11	-47	85	-64	38	-42	-74	-27	-32	43	-23	31	34	-77	-5	8	-35	19	-1	21	31	32	9	-11	-12	-9	-9	7	22	-24	-22	48	50	-67	14
422	-147	-34	150	-23	110	88	42	-149	552	70	58	51	129	93	37	291	200	33	76	382	206	-87	85	77	8	1	-107	-113	80	-2	176	82	-160	139	-26	60	105	-12	20	-33	7	69	73	35	12	30	-2	45	-4
423	330	837	473	530	687	200	257	193	481	373	575	117	962	816	705	358	1657	442	304	1418	822	154	429	817	253	338	496	627	292	282	666	968	525	482	377	268	201	329	267	367	478	758	732	525	269	471	264	535	127
424	289	1028	1105	969	664	704	934	904	815	385	572	125	599	418	579	646	1104	508	736	1650	734	589	522	553	520	651	1035	615	222	699	874	846	1216	244	896	306	385	421	550	488	551	668	679	599	778	759	462	1008	788
425	237	345	109	118	349	26	204	95	243	113	408	140	331	186	258	169	580	217	132	794	528	117	121	238	117	58	167	311	291	316	289	404	71	172	233	62	204	142	116	421	417	508	497	239	52	177	10	215	45
426	-2	29	179	83	73	170	35	73	119	62	154	60	29	47	44	344	197	96	94	7	17	92	89	-44	20	76	59	144	93	95	-54	56	102	54	98	68	126	30	103	93	19	58	62	46	52	43	61	48	38
427	1264	936	924	948	1364	974	944	1233	1173	940	680	717	881	850	705	1017	783	932	617	1186	455	1112	742	1302	959	1194	871	1643	2453	891	939	743	2128	574	723	321	606	399	581	993	1442	1074	1094	675	981	968	699	950	932
428	213	236	474	213	128	88	137	359	135	170	155	127	60	229	143	178	227	133	130	229	469	163	203	205	209	120	359	284	395	123	163	135	374	73	124	11	59	79	63	34	193	147	81	117	122	167	17	379	331
429	125	548	185	-17	163	83	-72	247	267	112	159	112	484	705	256	238	1030	-11	397	2001	402	423	364	-3	92	397	29	41	-1	121	170	527	76	225	233	155	208	50	41	541	1009	399	401	596	-24	128	20	68	24
430	168	142	198	106	138	120	95	157	70	91	119	79	143	106	122	13	368	84	23	423	23	7	55	151	130	146	386	260	52	143	88	83	400	53	86	5	13	15	18	75	122	176	88	50	102	2	68	189	31
431	2637	1486	2570	2724	1998	1561	2512	1731	2012	1748	1302	990	2061	1821	1708	1503	3735	1410	1590	4352	709	1353	1234	1993	1609	1844	2721	2179	1585	1646	1815	2782	3334	1512	1317	1438	1071	950	1081	1205	1683	1446	2036	1188	1902	1416	1695	2098	1772
432	511	131	257	236	128	99	248	109	223	152	177	172	123	215	121	113	247	1888	187	150	181	124	66	159	140	178	262	313	96	67	199	170	223	117	1112	96	2	119	85	438	257	115	346	159	142	84	162	260	197
433	-267	-104	-322	-47	-140	-56	-164	-133	-73	-135	-213	-96	-116	5	-58	-174	-205	-198	-95	-101	-71	-119	45	-214	-101	-67	-156	-159	-177	-127	-254	-99	-321	-87	-69	-93	-258	-21	-86	-79	-134	-43	-122	-76	-144	-141	-63	-218	-399
434	136	-634	112	-73	245	-23	-117	137	109	124	56	107	119	80	101	94	-20	64	115	186	21	142	191	326	82	211	-37	149	158	44	161	294	-4	36	249	106	31	46	-148	67	102	-66	74	215	174	154	254	329	81
435	60	131	59	301	815	81	241	13	278	-78	138	140	428	180	526	109	360	112	10	1017	-163	-99	-11	402	-20	126	-103	125	161	88	182	547	11	776	343	472	306	613	219	381	270	857	609	295	22	265	144	202	-24
436	318	465	562	546	778	380	277	134	699	169	605	146	808	427	541	314	448	458	375	903	336	257	336	479	184	157	527	354	232	293	498	905	203	463	237	339	206	83	112	198	231	577	403	211	431	177	302	229	238
437	879	588	1439	896	558	1013	860	884	1152	733	774	465	955	807	502	775	610	806	697	1339	575	626	761	801	654	367	751	654	961	158	359	853	830	485	718	650	578	698	459	702	703	561	975	609	539	741	846	766	947
438	719	247	936	932	1708	711	922	293	1333	730	532	260	796	1084	1109	791	986	376	1013	2052	991	-1	419	916	174	748	566	132	518	291	687	1281	1027	1106	533	714	664	638	385	236	353	1294	1128	275	883	393	495	539	295
439	632	300	606	361	674	220	620	512	816	333	994	206	1043	535	524	675	871	452	576	2410	1251	665	241	699	218	511	488	241	522	530	481	1281	415	479	401	369	360	192	136	528	1426	1040	693	866	369	386	325	449	286
440	179	-45	455	39	564	202	21	-40	720	71	457	-64	650	356	334	313	222	186	191	918	204	184	144	290	-9	265	62	-7	215	110	361	776	85	277	14	262	200	168	75	110	-65	555	322	235	9	144	170	69	-67
441	2148	1837	3259	1030	2755	1611	1398	503	2044	2356	935	1185	2913	2146	3404	2241	1534	1276	2314	4371	1712	60	1082	2379	1634	3159	1314	1583	866	1653	3065	3771	2893	1922	1189	3018	1268	2059	1424	1715	1227	3155	3734	1422	1635	1274	1858	1291	1175
442	-193	171	-476	74	78	149	614	217	156	304	319	99	405	128	86	190	339	112	193	413	-104	289	457	-131	349	-105	586	243	-710	-19	18	232	782	23	-19	185	13	181	167	184	298	-13	157	298	481	509	-421	-50	-324
443	591	521	680	482	323	385	591	590	605	576	360	373	401	576	68	349	305	307	327	458	319	363	554	653	278	218	966	477	1639	362	262	391	940	283	343	275	327	283	213	278	269	344	239	209	439	427	312	616	728
444	68	77	130	13	80	142	11	-25	42	44	74	57	92	64	17	15	-68	55	49	103	69	20	-11	87	116	81	142	-55	29	42	2	-4	85	-21	115	-57	43	-12	-9	59	73	115	-14	64	-42	-64	99	84	288
445	-80	31	-610	-626	190	-302	-283	-361	307	-329	6	-87	-173	3	173	11	-245	-181	216	334	3	-81	-125	121	464	-8	-95	-111	106	67	-92	-157	-535	144	550	-90	-19	218	228	-76	-153	-171	293	62	-49	288	149	30	-257
446	-33	-300	-20	-425	236	-494	-556	-401	201	149	144	160	-272	228	103	127	-155	78	-29	-962	-243	-198	-452	-455	89	-35	-1139	-212	-786	-109	-384	-383	-908	-15	283	326	-69	36	-320	64	-63	-297	-126	-62	187	-162	-134	220	-240
447	142	118	128	58	132	28	183	146	125	171	11	137	230	8	96	178	187	209	13	298	31	146	68	212	38	182	48	108	149	219	176	317	478	-68	122	-115	99	8	123	124	201	135	82	121	184	123	134	246	26
448	-60	-202	-131	-109	-20	-106	-8	-379	-32	-54	-92	-125	-91	-138	40	-57	-430	194	-27	53	58	77	-34	-191	-42	-63	114	7	-103	-96	18	-108	246	3	-81	-109	-187	-28	-69	-62	85	-195	-21	-31	-192	-236	-167	-132	-86
449	81	204	307	220	535	149	196	77	286	84	109	142	651	205	304	202	414	374	139	485	247	34	186	293	98	35	114	156	136	88	319	669	99	209	91	167	153	-4	129	-2	6	289	269	-53	214	118	213	88	74
450	1174	1120	1767	954	1730	1198	843	950	1481	1038	926	967	1000	1220	1620	839	1723	934	675	2207	884	1383	619	1113	1187	672	685	1141	1007	685	1138	1408	1558	1040	778	987	992	808	903	739	702	950	858	877	866	775	589	1093	723
451	531	507	599	558	624	305	530	650	361	295	300	656	1129	298	446	337	881	542	323	1125	704	889	233	351	519	1560	1373	898	630	474	1384	1357	1044	453	358	566	1718	2209	476	242	1146	862	1277	463	806	478	696	731	370
452	74	111	101	94	66	101	129	67	102	59	108	61	88	110	97	80	15	60	0	83	24	94	28	106	82	66	295	127	83	56	147	127	119	48	21	-11	-13	11	137	35	38	28	98	95	29	38	48	-8	40
453	1020	1007	742	1205	2504	396	1114	721	1425	792	818	622	1949	561	2385	1615	1568	1281	1128	3663	2959	959	448	2254	932	891	801	1033	680	826	1435	2477	1357	1660	1218	1230	1947	1413	640	541	1194	1714	2461	302	1108	1125	620	1217	663
454	21	671	1195	695	407	665	828	151	799	-51	834	481	322	84	316	500	49	540	390	739	572	691	915	116	571	458	1067	671	333	-23	672	865	1111	-3	538	-2	225	450	-52	248	327	799	438	346	594	133	424	231	274
455	-204	16	12	-148	33	-5	-57	-239	174	33	5	-1	19	-33	55	-91	-57	-61	62	-17	-48	18	-32	0	-89	52	6	-154	335	100	-132	-69	-126	-39	-158	-63	-172	-73	-20	4	-109	-35	-84	-27	-112	-126	-96	-30	74
456	-540	-509	-1319	-798	-186	-750	-1107	-1389	-745	-735	-773	-573	-321	-556	-432	-463	-1246	-509	-713	-404	-705	-583	-927	-790	-295	-381	-1336	-668	-1521	-391	-470	-621	-1568	-186	-435	-259	-559	-7	-171	-544	-550	-414	-235	-508	-509	-538	-238	-1061	-1046
457	963	1676	1226	927	1899	1017	1660	491	2262	1362	1364	711	1372	1399	1912	813	1139	395	501	2497	787	559	1090	1842	573	1160	505	1025	825	1122	756	1511	773	1430	367	1733	1160	996	731	1098	2100	3219	1593	867	963	450	632	1357	954
458	-946	-298	-572	-425	-430	-323	-210	-409	-405	-274	-278	-208	-748	-338	-385	-250	-379	-534	-495	-578	-146	-409	-710	-742	-231	-924	-445	-873	-1004	-174	-422	-589	-561	-123	-370	-364	-85	-83	-117	-255	-514	-165	-465	-290	-172	-466	-259	-456	-420
459	-193	410	505	106	127	261	499	115	395	381	-66	524	73	172	533	259	-8	-83	375	-636	198	125	275	377	-350	-144	181	101	-802	517	138	281	408	183	-295	-40	172	0	-94	30	-333	9	-124	-183	287	82	-203	593	516
460	-509	394	-585	110	56	236	499	-433	592	338	-198	0	57	-278	549	170	358	15	-114	-122	-92	-184	205	1	254	-157	810	-965	-768	347	-27	-100	-622	-117	-50	90	-92	298	117	330	-70	764	229	-57	506	-105	503	-406	-117
461	75	129	44	218	110	33	115	32	9	54	38	7	103	72	158	28	117	99	101	22	48	74	43	168	9	117	12	214	234	35	191	51	128	-4	43	97	142	80	12	105	146	145	84	53	74	2	205	355	295
462	88	95	141	44	67	60	107	26	115	25	167	56	84	43	46	67	71	26	38	68	141	52	66	180	121	126	112	9	70	52	29	62	176	72	43	-19	54	-1	0	42	51	35	56	49	317	74	27	81	125
463	1291	1213	1521	1014	1191	1091	1112	748	1921	781	1544	651	1231	1203	1386	929	1353	847	853	1792	1105	635	636	1095	522	746	1035	844	898	612	958	1973	1158	1175	1002	1113	658	477	866	704	886	1316	968	918	783	932	1131	887	757
464	4031	6862	5528	4058	3835	3819	3147	3151	8151	3072	6096	3052	5117	3989	4212	2207	4480	2680	2337	7101	3705	5147	3792	4282	2613	3218	2215	3558	2671	5071	2252	4841	2770	2900	1812	1795	1988	2093	1792	3403	4095	4217	4328	5836	1640	1972	2168	5948	4135
465	-243	-233	-319	-321	-132	-348	-243	-223	-289	-276	-262	-186	-143	-218	-151	-229	-194	-217	-159	-265	-101	-180	-117	-209	-172	-168	-325	-352	-127	-139	-247	-297	-428	-336	-60	-166	-340	-63	-111	-186	-231	-97	-131	-159	-264	-224	30	-313	-230
466	149	0	236	22	106	120	65	94	139	76	66	-17	80	129	52	99	21	28	60	88	92	-10	106	121	44	43	131	84	26	29	52	96	141	-9	88	-1	-18	85	-23	66	158	43	65	12	104	139	43	33	74
467	-36	-79	-469	-358	-26	-186	-331	-362	-278	-404	-128	-35	-155	-195	-39	-50	-220	-187	-242	-174	-96	-218	-96	-9	-133	-38	-403	-463	-673	-235	-142	-106	-434	-244	-52	-155	-210	-226	-204	-108	-142	-103	-74	-40	-264	-221	-200	-573	-536
468	-23	4	-62	-67	1	-110	171	202	12	-118	187	43	19	258	65	52	-52	-14	-58	190	22	17	136	-81	-35	-33	82	-98	64	129	-60	144	-237	115	170	133	106	-43	-47	168	130	181	210	-96	147	-74	-53	-281	-192
469	-3	-87	271	-492	107	-341	-512	-632	0	202	16	-146	251	-68	124	121	3	319	-88	167	186	-73	-142	31	176	228	1461	159	-745	-76	-205	148	-250	-162	-216	182	385	-92	-112	172	85	591	227	-164	107	262	421	39	-408
470	588	316	1352	469	693	542	603	437	622	334	352	224	931	313	731	454	224	300	380	1344	171	387	330	718	317	188	305	639	219	240	313	673	190	488	317	388	215	181	224	332	419	571	662	220	167	280	236	555	452
471	128	-7	118	-21	83	272	47	-274	-99	-91	102	298	112	136	264	56	-114	-146	-106	-68	-92	-126	-79	-213	282	155	-43	36	207	-138	25	-61	-123	-173	314	23	83	285	-35	234	98	-205	5	125	344	-121	287	-13	-139
472	-206	-115	-207	77	-79	-26	21	-82	-32	37	-67	-40	-38	-66	37	1	-32	-115	24	-27	-109	-75	51	-137	41	-38	106	24	67	-193	23	7	-22	70	134	28	4	69	114	31	-139	-47	-79	10	22	15	22	-53	-238
473	35	176	159	242	53	81	137	220	83	39	71	27	101	113	159	74	50	60	77	452	46	-26	98	156	23	82	59	-4	27	63	60	177	94	57	28	19	20	43	120	182	101	80	147	113	49	193	-20	46	88
474	80	24	-50	-15	238	-26	-30	-199	46	-88	122	-38	186	88	95	-10	220	-29	-62	345	-32	-130	-119	208	65	-20	-6	-289	38	-45	168	467	-18	59	86	-8	-24	-27	13	-59	21	21	163	-43	67	30	12	-84	-223
475	180	687	160	573	692	26	715	127	124	141	163	801	759	119	1089	327	798	355	760	1205	789	470	174	554	504	139	322	24	528	118	479	1034	323	627	249	198	212	297	167	414	503	841	286	51	414	432	549	147	336
476	-61	-105	-276	-185	63	-163	-151	-403	-128	-93	-14	-31	-66	-3	-31	-85	-88	-153	-97	-169	-62	-190	-117	-36	-122	-137	-62	-125	-112	-118	60	-23	-182	1	-189	2	-144	-181	-163	-37	-78	-116	-83	-66	19	-200	-40	-209	-117
477	139	396	-28	634	449	108	336	860	133	45	774	28	391	247	935	417	283	-10	100	3038	3346	612	93	840	9	120	560	188	363	26	712	565	112	680	442	335	219	83	286	454	898	1134	616	378	159	306	142	91	-125
478	161	-28	6	188	464	-16	-10	-77	73	-37	-122	-43	286	357	537	214	990	353	99	396	108	-183	-112	370	51	198	206	-552	579	-160	281	768	-159	428	274	123	32	-21	34	-58	-95	471	251	-138	132	36	127	141	428
479	-38	-148	122	21	287	-42	-62	-43	-62	-65	-66	-122	38	-45	164	122	112	116	-32	222	-8	-13	-127	-181	106	94	-168	-135	-39	-136	102	2	105	-6	-4	-85	-136	-15	-32	3	61	13	186	49	-94	-15	0	-37	-254
480	22	319	-28	228	153	307	-65	398	-49	336	46	350	636	132	303	428	204	1516	237	934	660	137	15	176	484	521	54	1136	60	842	1861	1548	717	230	1170	271	189	665	671	1042	1185	264	1124	733	292	437	287	-115	76
481	69	146	337	191	115	220	248	533	253	106	121	139	123	196	187	437	451	181	68	660	123	240	265	315	180	162	269	171	418	100	268	194	411	7	-40	130	266	-5	102	24	209	152	101	262	69	172	188	312	254
482	-6	-43	281	-150	-102	-216	-42	568	-39	1	-113	-192	376	201	-57	74	-2	406	-51	-16	366	-57	-203	681	-105	489	-104	258	177	223	374	-30	-202	411	-12	85	-227	15	-35	71	365	377	438	233	-19	355	177	-107	-153
483	791	1012	748	851	959	755	986	1200	790	428	585	435	799	789	847	843	1285	530	274	2347	605	700	666	986	586	1089	697	724	846	611	638	1014	688	705	490	873	499	466	304	752	851	734	742	944	511	811	404	714	706
484	299	256	414	362	348	382	504	452	517	279	418	303	551	334	593	338	475	251	276	678	138	265	448	508	393	600	165	605	354	223	325	682	274	441	156	342	347	373	247	217	238	583	380	181	317	314	160	327	242
485	423	7	748	815	421	497	-354	184	900	223	225	313	878	661	157	792	306	533	556	1844	287	-664	-136	226	549	605	746	-345	-566	399	1391	392	699	605	1088	148	323	-27	425	481	598	426	200	786	773	375	259	-16	-1320
486	88	290	271	239	680	268	265	40	297	204	139	-21	540	396	404	134	498	34	302	916	-346	-262	132	269	263	355	-62	234	187	456	134	208	245	480	124	148	541	330	207	147	49	615	442	-28	816	206	104	-31	158
487	55	21	-10	2297	1509	76	1127	20	179	27	27	-14	1058	313	441	-59	242	281	22	82	43	-77	30	1830	120	31	6	292	-13	387	-84	414	-31	812	134	71	213	358	54	130	106	23	111	173	461	-66	155	961	353
488	233	30	7	94	463	108	226	10	172	-57	167	-84	260	433	340	94	391	226	0	1313	201	-24	-205	221	98	-47	-92	-103	62	110	142	295	-118	286	100	72	185	134	97	240	42	567	605	159	147	25	-17	-126	-100
489	271	1151	319	197	355	263	404	467	472	299	411	116	297	322	456	307	843	226	295	1068	1099	411	723	466	196	273	109	140	273	259	294	275	195	333	430	263	43	14	85	298	463	629	542	697	177	103	0	474	238
490	1048	1550	1521	369	554	841	561	403	1753	791	986	257	886	837	528	675	1416	368	956	1343	1064	249	412	554	401	382	422	147	650	406	977	818	494	464	108	222	201	427	454	597	801	1502	605	966	137	339	864	503	870
491	63	15	302	130	163	69	5	58	232	-12	4	-4	42	208	140	65	203	70	99	109	-63	-30	100	157	90	100	23	-103	120	6	23	59	-19	62	26	-53	-8	77	60	64	43	90	159	-19	67	-79	73	-61	79
492	159	409	336	359	351	272	-1	121	434	231	447	186	621	305	321	136	622	144	307	1061	348	198	132	289	308	455	-292	265	317	464	266	683	-86	496	391	533	132	451	290	281	375	549	584	362	426	103	589	167	180
493	269	146	317	88	336	-26	331	-41	325	103	174	-34	303	502	350	219	308	159	93	366	22	115	72	424	152	210	270	-154	92	218	-18	322	331	300	221	283	194	171	198	129	87	385	164	77	167	193	284	204	266
494	-234	217	-482	-196	17	-83	-100	-197	-204	-120	-115	-71	165	-115	-39	-581	-257	-143	67	48	-9	-104	-159	-103	-97	-155	-456	-311	-32	-138	-105	-104	-1262	112	-177	-14	-195	-112	-392	80	-29	-203	0	1	-104	-311	-99	-234	-117
495	192	101	226	206	113	163	129	245	139	173	121	45	183	160	154	197	89	152	147	240	38	102	165	262	72	161	209	202	93	48	132	273	222	78	16	-38	13	86	26	85	146	219	146	138	69	123	71	75	129
496	202	236	455	297	238	232	162	481	280	253	170	258	258	301	225	200	175	541	219	104	0	180	216	241	243	416	386	357	159	381	119	304	232	239	293	197	165	163	114	360	363	158	269	143	249	182	124	162	33
497	326	234	237	378	309	44	204	232	207	164	307	455	868	413	242	313	297	201	230	847	214	91	134	463	413	219	173	202	256	536	428	1522	233	247	463	223	346	154	171	338	409	575	787	401	167	74	254	299	187
498	244	555	309	278	371	216	152	139	282	144	252	130	787	299	269	324	290	416	369	773	650	109	129	454	118	170	89	36	294	228	407	976	119	280	247	177	205	228	134	180	243	512	545	588	32	74	228	123	271
499	37	334	393	414	100	357	561	236	22	258	17	99	174	17	308	356	477	295	234	578	202	122	560	131	150	252	287	45	76	217	94	174	425	349	134	275	-65	584	266	487	389	337	445	54	491	-118	401	197	100
500	512	666	1161	1025	785	577	1075	862	1132	580	554	273	1829	614	2064	460	213	288	936	1422	202	1653	433	1952	614	570	330	813	541	478	388	1040	866	1015	194	136	649	522	123	420	595	1370	799	151	716	880	976	291	331
501	-477	-88	-850	185	-96	-176	-199	-211	-153	-233	-161	-125	-297	33	88	-78	26	-391	0	258	352	-126	256	-137	55	-370	289	-632	137	-203	210	56	-575	468	-483	-180	127	-101	-72	-360	-282	428	-101	121	-461	-427	-63	-111	-81
502	-152	-197	-434	-139	-55	24	36	-340	-197	59	-119	53	-166	-92	7	-93	-317	-146	-47	-231	-227	-109	-197	-107	-128	-214	-411	-226	136	-217	-75	-196	-453	-29	-7	53	-89	15	-21	-116	-219	-112	-114	-70	-82	-151	137	-355	-62
503	793	525	848	817	255	709	833	710	372	568	276	4	452	584	387	729	678	482	465	525	122	278	51	467	289	549	927	885	923	410	247	477	1044	428	192	455	-74	-23	57	482	377	398	413	271	416	736	22	957	286
504	1094	2133	2858	2107	3510	1742	1574	280	3828	1629	1983	870	1828	1909	2825	2268	3237	2502	1213	4867	2965	523	1662	2571	995	891	586	946	960	472	1525	2848	1370	1665	793	1276	1223	606	1291	553	737	2991	1771	506	1075	857	721	843	901
505	194	-921	254	112	125	202	112	79	111	-485	24	145	68	-55	233	-434	-1068	-27	-211	-315	242	168	22	2	-89	-243	-165	-444	551	-761	479	42	-169	-120	-36	-326	-149	40	-420	185	-234	231	-213	77	-92	103	-338	-749	96
506	1176	1107	3080	1592	1781	2741	1075	1122	3483	1539	1770	583	2037	1341	2760	717	1577	1144	783	2064	88	778	1742	1566	1120	1292	938	1050	1046	1212	1351	1524	1743	3216	1076	3369	1502	870	716	342	949	1526	570	639	1303	2389	2211	677	1493
507	656	299	464	310	230	291	383	574	577	314	272	192	257	264	206	425	709	359	260	394	258	321	311	402	301	410	707	436	500	295	390	286	534	259	365	241	772	202	295	249	237	256	355	203	394	558	264	366	271
508	7	32	2	261	342	206	72	-61	110	114	51	-30	115	111	326	178	143	112	63	191	62	66	77	118	60	-24	-145	-4	-109	103	25	132	-15	137	228	280	222	245	41	64	87	267	318	137	67	113	-15	69	-50
509	966	1401	2432	1973	3876	1637	803	718	3601	3453	2000	1595	2939	2898	3823	3764	4369	2966	2974	6806	2276	306	1331	2189	1560	2582	668	970	1193	1310	3280	4699	1547	2742	1367	2419	1943	1093	1994	1105	1558	4094	2977	1598	2241	1897	810	1873	1435
510	-75	-65	-371	-268	281	-222	-342	355	76	-74	-176	-171	611	53	238	6	-70	-102	459	771	94	-95	-197	15	-172	35	-372	48	243	-95	193	870	0	-10	249	139	249	192	-188	100	-50	457	413	-198	67	-200	22	3	7
511	-417	-353	-614	-386	-282	-368	-492	-403	-486	-364	-312	-303	-307	-332	-420	-293	-693	-330	-246	-496	-338	-465	-381	-470	-360	-499	-760	-555	-426	-293	-380	-333	-752	-338	-603	-246	-268	-179	-232	-270	-399	-334	-292	-190	-272	-283	-96	-524	-586
512	178	234	363	179	33	-28	238	383	171	138	84	169	158	311	176	156	210	201	255	169	87	160	235	185	226	270	419	415	196	47	187	402	257	68	144	80	51	222	109	188	247	105	92	231	92	182	66	263	163
513	427	25	546	347	226	215	693	485	555	184	70	221	246	299	166	326	288	155	104	167	-11	574	429	329	315	299	-18	347	163	-154	155	495	403	117	132	160	291	115	261	205	343	-231	137	143	194	399	78	424	541
514	8	102	516	-82	68	124	33	194	127	106	107	21	-16	263	57	107	197	-28	49	164	78	108	146	-122	92	84	76	337	118	158	174	115	64	48	141	-42	-9	95	-17	65	198	157	76	70	-27	162	-38	110	153
515	238	-622	443	-238	111	330	-186	-478	778	274	532	-33	205	-3	403	246	-35	5	-46	241	76	-321	305	401	-69	210	-291	350	-216	4	48	-295	32	450	343	41	-109	-207	-17	22	71	-153	-15	-224	22	-95	-99	-337	-288
516	39	59	43	51	47	-32	30	74	-21	41	-14	-17	23	36	12	24	54	52	44	37	29	20	106	-11	51	40	172	9	61	69	-31	35	21	40	40	-56	-194	24	0	46	33	65	76	4	44	-82	165	57	132
517	984	1709	1504	862	1990	739	1046	601	3278	1068	660	456	1451	1323	1513	1235	1669	490	851	4003	1977	137	590	1188	678	1168	-65	946	267	1128	1235	1624	874	1020	992	576	593	867	702	1147	1403	3418	2367	677	1056	847	998	959	605
518	1396	1932	1365	718	916	830	861	1012	1153	579	1501	1044	899	518	819	1389	1204	518	970	5938	1029	1765	550	1111	549	883	965	586	849	1219	666	1123	957	626	790	649	389	534	478	689	897	1247	1008	1588	534	1272	584	589	555
519	240	109	208	297	309	56	280	85	175	111	98	38	459	198	380	265	265	99	219	306	268	134	81	373	-18	79	23	-28	177	84	231	520	135	236	112	185	159	111	52	87	329	367	228	89	54	51	203	41	98
520	760	738	1480	954	942	643	452	1025	1225	510	1418	520	776	1045	940	859	691	619	846	1243	768	1038	634	1160	608	488	1125	813	581	951	783	743	1114	518	478	201	251	199	297	576	825	578	664	1054	696	705	790	886	771
521	164	151	144	252	224	83	287	170	271	77	38	57	336	306	151	273	335	96	110	555	277	-22	115	323	72	96	129	48	207	188	252	345	85	151	50	87	110	129	47	67	47	268	186	50	134	236	160	152	223
522	931	515	1041	401	665	535	505	922	845	206	430	205	985	682	677	331	199	439	554	777	633	629	797	1050	674	612	373	835	428	847	535	561	510	823	689	656	604	789	321	551	585	722	979	528	464	826	577	485	543
523	370	428	348	419	319	193	273	169	166	111	180	176	348	242	210	322	240	191	312	383	267	338	203	560	200	248	-4	178	84	-27	546	485	139	264	88	231	331	151	137	152	325	656	564	401	64	226	566	143	137
524	114	110	83	71	87	19	80	118	109	9	41	15	307	38	30	99	72	77	72	250	157	116	5	94	86	82	75	55	61	110	172	212	173	-7	64	63	49	168	-23	81	105	221	195	44	64	36	177	157	-177
525	-516	-548	-1329	-711	-399	-432	-920	-1030	-590	-833	-594	-646	-577	-666	-456	-451	-197	-347	-102	-517	-284	-614	-522	-655	-430	-347	-999	-692	-980	-588	-268	-822	-935	-165	-1031	-126	-698	252	-461	-437	-571	-320	-629	-262	-386	-718	-393	-573	-449
526	941	794	1308	727	546	743	1151	1359	1077	775	746	599	785	1090	395	847	585	736	629	841	650	717	623	715	608	811	951	1035	1219	580	798	812	1867	532	490	561	388	343	640	723	599	872	771	565	651	991	706	1034	1154
527	571	453	843	872	666	764	1246	952	886	131	440	208	595	708	801	389	2109	213	144	1173	323	244	636	765	388	388	1063	398	159	413	1000	576	1532	541	326	584	334	220	139	40	-23	740	453	211	371	767	503	244	485
528	212	724	425	851	697	490	640	544	500	-31	179	372	473	864	492	736	418	130	679	228	269	95	625	355	552	613	384	263	-23	388	477	463	1649	543	521	415	-25	332	643	409	15	725	197	343	753	669	620	135	16
529	441	524	322	451	566	211	431	481	289	194	220	126	646	438	351	396	2335	250	287	1177	553	133	189	596	178	211	395	82	554	236	540	937	443	591	334	200	291	233	177	204	238	714	409	239	327	396	183	255	132
530	127	71	253	128	74	64	184	43	177	117	89	35	89	124	1001	173	74	130	24	118	42	61	146	88	84	89	297	265	326	13	325	104	333	56	84	97	63	135	109	93	5	105	67	5	107	229	106	126	91
531	549	367	486	441	363	456	475	415	549	396	282	327	385	321	170	349	995	397	212	611	328	457	699	388	271	499	904	799	585	501	342	550	1387	208	391	412	368	288	417	303	489	249	393	220	391	623	360	561	579
532	4157	11557	12125	8484	9575	5315	6270	4566	10061	7194	7021	4036	12920	6555	11506	11089	13775	4845	8499	13830	16492	9604	5479	12848	5613	10573	4578	5726	3358	7074	8670	11744	7533	8218	4675	6619	3351	2932	3903	2673	8199	9722	7077	4921	7437	6445	3451	5817	5407
533	252	300	312	379	487	179	198	392	324	148	368	142	379	588	324	217	913	277	176	1239	421	99	201	522	122	197	223	164	279	178	332	617	209	396	305	283	342	160	74	169	257	376	428	171	129	267	152	215	185
534	540	831	1374	781	466	761	662	1086	938	140	592	333	1028	767	975	612	2094	342	837	1911	1186	483	509	1033	304	571	840	864	752	550	666	999	727	773	855	686	907	698	391	697	631	1418	1282	457	808	584	704	647	682
535	748	480	1059	380	304	158	302	427	494	358	368	73	381	452	328	380	1022	402	313	559	78	619	322	510	389	443	680	1062	335	251	306	561	757	256	170	284	378	205	71	327	362	396	432	220	349	252	294	488	834
536	1027	1701	1764	1406	1401	1033	798	1187	2699	1019	602	556	1313	1754	1907	1183	3686	1794	1423	4621	1006	1281	404	1528	818	1260	633	601	966	623	1727	1947	1166	1335	1040	1067	866	590	703	839	1331	1631	1019	1614	788	700	604	979	1108
537	266	169	272	205	308	179	240	62	158	111	212	209	372	268	288	137	165	302	156	755	236	68	315	511	105	285	164	371	161	163	405	294	199	226	293	-65	-138	79	44	468	358	265	432	260	144	234	139	74	137
538	556	476	498	1211	820	485	734	223	686	721	551	198	550	694	1287	475	883	1281	256	568	454	43	613	298	231	306	433	166	-23	376	741	579	391	867	586	560	462	368	440	113	78	734	545	72	449	494	691	226	-4
539	645	1000	961	629	1156	241	352	143	1136	357	1259	172	1231	904	735	264	1086	522	417	1633	1479	757	319	896	346	549	250	347	691	984	1124	1617	309	734	326	198	568	460	160	471	859	1543	838	561	249	231	226	596	440
540	290	251	685	262	204	360	250	89	177	149	686	93	92	434	137	79	123	119	2	185	159	179	214	270	118	78	-6	246	196	76	6	124	136	115	144	37	44	47	74	211	202	75	92	96	-12	72	12	192	230
541	156	234	-62	158	98	-92	-26	8	-1	-9	89	97	62	123	285	30	-158	100	-33	114	362	290	-72	234	221	1937	-9	516	650	27	65	272	165	358	249	-263	-170	628	655	134	143	243	303	260	97	149	330	248	-76
542	310	1359	1060	458	488	693	878	419	1137	1526	1766	423	80	475	465	270	718	627	123	967	2115	1352	1244	1084	138	119	300	953	452	656	413	107	233	547	449	256	-6	330	275	1529	1349	205	372	357	312	136	231	1504	704
543	5152	16420	7840	5802	4690	7461	5713	3230	11441	15331	2499	6116	5451	1950	7612	4009	5493	1689	3219	13311	4391	15272	7426	6179	10032	7253	5454	19135	1046	7696	3967	5801	5813	6989	3997	6269	6037	3823	7745	7726	13500	6726	4693	7535	2349	3007	7043	10726	2205
544	686	1096	1050	981	574	967	1024	671	1052	801	852	656	397	598	906	909	1230	509	696	1028	371	609	606	919	534	486	718	869	720	479	540	544	900	752	704	656	601	794	649	581	697	788	803	577	631	702	620	1048	973
545	440	220	447	426	431	348	435	232	489	236	276	112	318	313	320	264	708	404	139	314	167	181	193	319	128	184	560	337	235	358	302	478	358	252	185	108	217	168	225	116	330	571	483	121	309	448	399	171	156
546	27	70	-28	99	129	103	11	-31	-83	-65	80	0	8	108	192	-15	-55	-27	-27	97	143	-9	15	52	-62	26	-100	-12	-46	-45	100	-16	-394	-7	12	-40	-77	-8	4	3	-17	116	71	70	-89	-100	12	72	-93
547	140	416	123	182	339	76	193	199	223	41	429	149	410	92	302	140	369	498	688	342	241	295	-49	373	-16	134	57	50	130	391	365	460	29	536	338	182	31	187	99	128	274	409	316	298	144	144	104	78	88
548	-675	-855	-1221	-626	-473	-638	-683	-1151	-692	-515	-496	-500	-509	-633	-510	-654	-656	-488	-593	-731	-518	-500	-501	-556	-582	-291	-1040	-313	-840	-611	-239	-570	-1081	-421	-548	-446	-336	-288	-409	-422	-347	-543	-515	-470	-561	-551	-526	-557	-372
549	23	0	55	65	1	42	89	56	80	13	20	-7	28	89	10	132	41	41	-6	90	74	19	-85	-47	19	36	167	72	62	51	73	29	49	20	7	-91	38	36	18	-7	57	57	53	10	4	18	50	65	26
550	24	562	83	111	103	64	206	137	74	125	277	64	282	43	195	17	150	-19	147	305	483	197	150	202	210	60	-23	16	84	212	229	267	-121	115	43	69	-27	49	61	218	211	136	157	302	-59	36	30	86	98
551	-131	-60	-253	14	-31	-122	-47	-37	-19	-153	-95	-97	-62	-74	-56	-11	-120	-61	-28	-89	-119	-13	-85	-85	31	-162	-51	96	-93	-70	-42	-207	-55	12	-9	31	-49	56	-15	-38	10	-6	42	-128	-32	90	-106	-23	-72
552	2697	350	1218	590	125	631	1574	466	241	436	37	411	445	189	407	420	319	211	421	603	139	1748	379	476	254	537	1229	2331	991	555	237	560	1958	345	891	2822	415	363	940	1028	1533	410	239	242	539	1555	874	942	812
553	222	91	299	93	3	167	211	262	77	119	112	140	26	153	1	33	45	128	142	80	212	156	163	321	32	209	212	185	310	80	56	-13	188	322	269	85	131	-27	0	133	-30	196	-155	121	134	193	109	216	197
554	105	322	794	277	371	289	297	646	930	472	449	145	451	451	216	373	828	964	51	500	202	380	393	348	337	274	481	378	175	248	44	297	705	228	242	197	222	142	210	248	270	488	240	254	224	468	172	147	254
555	1559	4021	2049	1085	1344	2107	1512	1535	2507	1758	2093	1171	1675	1400	1564	1302	2818	522	1659	7392	3118	1677	1983	1674	2207	1980	544	1894	982	1838	1054	1663	1710	1174	1189	3056	1344	1113	878	3983	3828	2347	2866	2986	916	1066	930	1530	1387
556	1554	1479	1827	1470	2038	1607	1614	1589	2408	1068	1258	1090	1856	1486	1653	1899	1864	1308	1207	2228	1273	1468	1590	1619	1222	1530	1455	1528	954	1607	1525	1644	2813	1441	1273	1685	1503	1020	1181	1481	1738	2106	1820	1629	1615	1743	1731	1647	1163
557	211	249	279	233	192	158	322	179	110	39	93	148	175	175	73	86	-70	55	40	231	72	197	146	226	96	89	-43	263	27	33	29	196	112	101	16	123	47	118	24	148	137	20	118	125	89	115	172	59	81
558	-16	2	-25	-13	-10	3	80	64	9	53	18	-45	-11	71	33	10	71	28	-14	31	6	-11	-64	-25	-30	-9	123	-123	-20	-82	6	-33	95	4	-50	-102	-97	-44	23	-7	-23	19	-9	27	-9	105	-116	-28	-14
559	329	450	343	475	993	128	369	197	450	314	548	172	1279	566	904	695	692	283	323	1696	1274	269	222	651	269	200	140	376	241	396	619	1701	206	610	480	284	180	233	242	443	426	599	893	516	247	190	218	360	98
560	-8	-7	-6	66	16	49	18	55	52	15	16	11	-17	-5	14	-16	-53	-52	-38	76	137	39	30	-82	-10	-62	-23	-28	-43	-45	-33	-1	-45	17	55	-35	-59	21	24	-7	-21	18	-7	39	-37	97	17	-86	-52
561	80	-16	109	86	-46	-33	119	-38	49	3	-44	-40	-15	-37	20	14	3	59	-1	-9	86	15	43	-9	23	89	-18	91	57	-41	105	-8	56	53	108	109	63	5	80	5	18	-24	-36	36	7	33	-50	17	-9
562	-133	8	910	378	260	225	332	133	228	91	218	-5	-142	-42	287	127	124	-35	151	68	-227	-64	39	272	-29	-92	-120	-132	24	-84	296	-77	-48	580	2	-97	2	-56	-34	-161	-171	501	203	111	107	108	30	-17	-120
563	9881	17544	13086	14466	13686	10375	12736	8118	14541	9909	5481	9020	12192	8270	15261	10835	16373	11519	9622	15842	6872	8747	5855	12299	10798	11200	2248	11954	6137	13871	15873	13777	9419	14290	14537	16701	10893	10874	11853	8562	11773	12897	10878	9216	11848	7706	5637	12607	9125
564	140	153	404	310	175	97	339	259	136	158	215	125	232	154	125	216	459	282	182	287	104	258	98	212	180	96	348	159	190	192	71	282	481	283	62	85	42	129	128	166	319	113	193	153	212	159	155	302	134
565	-2	7	15	17	196	35	-42	-55	74	-83	132	-11	41	36	93	5	57	71	12	88	-36	120	-22	126	-59	-94	-164	-60	-54	22	-23	168	-260	-28	93	40	43	8	-69	9	-9	121	232	65	-44	7	-17	-84	187
566	295	359	294	314	612	108	315	88	446	85	291	-25	400	344	385	27	924	-27	47	497	36	-52	-1	715	-20	297	286	101	-4	237	264	443	478	324	233	179	274	210	-66	193	309	550	848	162	489	123	99	358	343
567	332	52	862	125	211	92	26	-64	2321	971	590	682	35	84	44	59	4628	39	56	1211	88	19	-51	135	370	88	129	272	215	651	426	535	47	173	96	277	0	173	-29	338	571	90	491	23	-142	77	76	513	1579
568	25071	23095	21525	21279	23776	11926	15712	13118	21772	21632	20849	19699	27485	21720	17418	22417	25027	22807	22763	21305	33548	21028	9459	25322	19921	28168	24997	25069	28306	30820	25794	25231	26823	19968	15910	18872	21328	20192	18045	21843	24027	24352	25277	19821	21519	18305	20795	25152	26279
569	133	220	314	206	147	124	114	41	242	64	61	102	62	49	103	39	435	62	81	73	43	141	-22	35	32	15	-23	26	155	-37	105	128	34	45	-81	17	80	37	4	80	71	117	111	98	-19	110	-96	111	139
570	-1450	-1684	-2317	-1377	-1014	-1408	-1503	-1500	-1797	-1521	-1200	-1118	-1016	-1223	-1116	-661	-1603	-928	-992	-1214	-237	-1386	-1326	-559	-1096	-789	-2897	-876	-1317	-1834	-369	-1313	-2759	-572	-374	-572	-711	-652	-306	-1321	-1413	-1559	-730	-648	-636	-870	-734	-1385	-1546
571	1232	2236	1912	1093	1710	867	947	1034	2262	1317	3271	753	2163	1345	1425	1461	1996	488	1586	4088	2817	2314	1143	2044	850	641	952	984	800	2835	960	2491	759	1238	759	630	815	857	552	2062	2399	2236	2816	2613	566	700	460	1701	1043
572	-265	-366	-42	-31	-237	-238	-378	-682	-209	-9	23	-135	-87	-268	-82	-342	-245	-319	-372	-251	-352	-316	-528	-437	-279	-296	-561	-345	-1111	-374	-132	-285	-445	327	-259	123	-221	-245	47	-159	-318	-145	-357	-166	-194	-270	12	-399	-822
573	401	150	85	144	256	352	8	-28	246	148	180	205	263	94	244	79	507	212	66	251	263	-19	20	117	168	68	-164	79	196	138	123	728	-69	460	367	472	19	1	-10	104	166	10	38	-76	87	105	312	125	-163
574	14	105	181	26	86	165	-154	-95	135	25	141	-37	136	45	103	105	90	-7	81	123	49	-44	-7	134	58	22	-236	-125	174	178	201	47	153	108	-144	-20	-61	93	9	126	222	305	158	179	104	25	61	9	76
575	733	264	-11	335	646	8	253	134	54	61	7	113	1041	402	865	967	320	328	325	834	1071	1115	53	830	152	905	353	246	486	342	302	860	914	438	211	340	279	238	512	367	654	906	804	753	187	206	251	161	161
576	977	660	1360	786	738	730	858	884	1163	519	581	441	847	831	679	569	616	465	585	1073	632	787	672	960	539	654	837	736	723	551	638	740	1105	757	620	502	403	515	402	445	539	689	641	404	509	633	549	880	945
577	468	437	678	379	335	405	480	409	461	396	289	155	784	436	297	258	339	277	288	702	319	285	246	452	201	264	369	395	374	352	510	1216	606	641	283	229	156	376	170	203	387	618	363	290	279	504	533	327	331
578	474	158	469	434	463	14	455	355	350	293	385	340	668	425	421	358	755	365	605	1355	768	486	123	556	223	141	162	176	286	143	523	1453	307	270	177	238	239	239	213	402	1015	762	514	453	137	54	223	994	319
579	135	161	236	350	261	96	1139	233	197	152	97	93	228	190	128	77	141	125	355	98	184	572	239	654	132	207	197	173	348	124	294	495	205	178	134	114	154	101	106	130	110	679	195	88	856	288	274	185	180
580	212	37	358	106	112	65	398	349	331	112	260	-4	130	195	46	58	99	180	-4	142	204	235	170	228	158	161	408	188	273	58	142	145	425	-20	67	87	75	67	85	99	131	49	88	70	194	272	185	218	74
581	696	1197	210	721	1090	343	734	571	656	303	1260	431	1157	771	899	1001	2022	560	657	2841	1577	1037	467	1159	671	651	334	630	636	457	1141	1729	512	738	586	653	457	401	416	903	1402	1226	569	1181	449	618	477	1184	437
582	1	3	45	8	76	-23	-3	-109	147	43	58	27	384	-33	98	-27	4	247	-55	114	177	-175	79	128	-1	40	126	-103	-46	78	14	247	-51	169	57	51	35	20	-27	-21	51	90	-14	44	-24	-18	160	-46	-36
583	-541	-404	-111	-391	-48	-440	-236	-488	-97	-289	-307	-221	-161	-367	-236	-351	-252	-318	-337	-259	-176	-121	-423	-29	-209	-363	-633	-490	-266	-474	-229	-338	-659	-126	-581	-131	-314	-137	-434	-224	-253	-140	-106	-6	-342	-373	-188	-557	-401
584	1162	767	1301	1327	1078	867	1720	640	1226	497	505	445	910	1088	1064	1333	2143	589	707	2106	383	612	649	1045	664	626	865	835	1119	558	661	1010	1396	1089	430	444	850	502	374	479	502	1618	720	498	561	793	332	1287	1211
585	109	33	90	135	225	-99	107	1	110	6	55	-44	907	220	403	167	176	148	206	613	286	56	3	160	-18	260	14	-4	32	170	353	646	170	266	173	41	83	186	29	98	118	471	667	138	197	128	12	51	-69
586	1692	1536	2039	1842	1527	1531	2481	2191	975	1006	1645	1201	1627	1798	1618	1370	2747	1370	1274	2490	1243	1778	1307	2205	1165	1696	2210	2066	2696	996	1309	1731	3910	1172	1370	1280	1628	947	840	1259	1379	1004	1251	1137	1300	1900	826	1995	1526
587	251	248	155	121	278	90	198	145	353	-14	387	33	311	122	255	174	152	57	119	808	272	96	96	301	67	136	70	132	-5	114	197	260	253	289	408	-59	286	280	-51	58	34	419	553	243	97	187	88	93	72
588	318	807	498	552	591	501	292	92	621	265	176	185	354	713	238	303	1526	391	287	1042	500	508	554	824	188	508	389	140	401	264	388	253	320	668	240	177	292	124	242	80	147	913	222	250	152	69	58	670	704
589	400	492	969	866	1178	638	621	487	1372	128	698	252	747	1124	1041	609	1948	241	582	2286	764	92	246	1105	299	465	230	-9	588	264	968	829	784	829	627	308	438	249	380	105	222	1539	654	434	217	417	101	454	382
590	575	1169	545	716	1211	444	258	593	790	243	1112	296	1481	623	1366	644	1558	524	861	3117	1188	513	465	1058	397	461	230	231	592	535	1597	1497	508	724	310	561	787	531	103	531	1154	1532	1697	719	209	182	122	437	401
591	454	286	310	374	436	240	250	299	303	216	420	91	425	378	252	162	315	146	321	832	147	414	153	339	224	163	76	555	-177	175	315	209	274	248	24	85	239	259	136	155	177	254	565	249	586	151	254	656	336
592	234	225	247	223	285	163	129	37	380	225	172	119	612	215	310	146	576	277	187	350	187	88	131	208	133	151	308	171	163	153	447	696	380	320	216	180	131	125	86	94	125	215	121	49	262	283	284	177	151
593	186	229	226	-67	504	-16	47	-182	46	142	382	-47	500	182	291	279	458	119	142	925	578	219	-3	413	62	340	-31	272	140	81	338	500	-31	197	2	198	92	92	40	375	438	359	464	347	42	25	78	542	259
594	-5	308	157	125	165	-5	203	-16	50	-55	1	162	183	292	182	80	150	257	344	307	643	26	30	168	99	157	-62	74	248	11	136	174	37	175	74	71	159	11	10	129	162	222	242	83	9	0	40	107	72
595	-230	-268	-352	-311	-125	-277	-154	-271	-299	-150	-260	-127	-105	-170	-93	-193	-201	-226	-147	-141	-181	-223	-262	-257	-203	-158	-287	-120	-124	-161	-123	-117	-255	-39	-204	-210	-172	-38	-174	-167	-234	-92	-159	-132	-187	-216	-114	-281	-286
596	497	698	750	387	1299	147	507	415	896	189	949	241	1090	794	1192	600	1783	650	662	1458	941	576	138	985	303	762	635	350	827	481	613	1513	662	604	499	126	251	219	377	371	497	1111	664	474	464	620	510	612	591
597	60	62	90	108	77	60	63	110	101	25	99	14	95	83	23	56	-51	78	13	299	51	149	136	20	4	64	56	41	54	60	128	112	21	40	12	-2	-138	151	97	22	26	64	102	21	94	-36	73	82	-74
598	363	538	372	-285	297	339	295	274	420	462	296	239	703	512	233	253	677	242	268	545	723	213	163	307	291	280	189	555	115	519	445	519	344	197	314	176	258	313	119	307	99	322	603	196	254	157	493	112	375
599	395	299	675	479	202	85	594	607	730	236	418	547	343	530	232	353	169	372	391	93	371	372	514	412	385	138	463	195	393	326	126	230	964	112	100	281	290	53	77	220	95	460	51	239	242	252	78	572	601
600	-144	8	171	290	181	186	-70	-86	37	-2	19	188	-14	1	61	45	-52	97	115	297	77	73	182	46	209	127	43	-38	89	150	300	165	-84	17	103	189	-75	-62	-32	100	119	44	81	14	127	-20	25	112	-113
601	-162	119	39	-73	-7	-48	-100	-46	-111	-86	-38	-27	-14	-181	-6	-65	-111	-86	-67	108	0	-78	-5	4	-30	25	-45	12	-130	-141	88	-41	-136	0	-79	-152	-123	-64	-24	65	-30	-23	-23	47	0	-41	78	-108	-266
602	132	49	192	140	118	140	-21	125	76	15	43	74	178	115	43	204	121	97	128	349	73	166	66	258	126	246	226	50	109	141	96	206	353	31	170	34	74	-4	37	80	190	64	174	143	34	82	167	157	100
603	19	96	1951	218	271	725	30	34	2026	905	774	73	1490	138	76	225	38	118	-11	384	1577	188	925	324	72	82	86	103	147	92	176	169	367	342	127	518	7	46	-32	104	110	287	69	53	114	195	200	158	-31
604	118	-21	94	37	66	-94	124	49	179	-89	-106	-21	123	-74	38	79	38	-8	71	140	113	214	28	-1	19	147	-170	26	245	235	-14	104	59	242	963	280	238	314	454	159	50	-19	177	98	17	342	114	160	55
605	540	957	1703	839	1239	1196	715	160	2105	1717	817	47	492	1959	830	777	674	1142	563	2674	614	-136	1044	1123	270	958	614	432	884	525	401	631	1287	1264	485	407	591	499	1177	363	242	944	1192	396	1275	705	-35	1050	762
606	500	633	929	690	865	222	534	218	917	481	888	284	727	539	707	475	372	503	433	1090	402	453	406	959	199	259	392	142	163	327	397	923	282	718	415	397	290	226	402	456	787	793	1135	388	282	208	200	314	173
607	425	457	621	384	290	389	512	560	502	380	379	373	296	400	210	470	705	393	335	522	294	448	440	485	368	420	790	506	680	434	334	472	994	198	348	300	259	293	304	690	483	397	594	237	347	576	330	516	697
608	329	233	329	394	572	179	235	266	303	83	56	-17	758	513	516	561	1156	192	189	1721	909	105	125	661	154	490	262	207	326	276	491	899	477	773	487	619	545	267	357	345	123	666	652	193	317	360	155	270	334
609	-1172	-1225	-1676	-1562	-802	-1189	-1520	-1827	-1358	-944	-970	-1046	-855	-874	-692	-1106	-1486	-855	-869	-1140	-728	-993	-1250	-694	-1084	-1027	-2193	-878	-1335	-1202	-632	-1066	-2386	-483	-624	-495	-600	-525	-476	-771	-734	-984	-660	-603	-886	-1225	-892	-1225	-985
610	578	146	502	509	270	296	396	347	329	281	263	217	527	377	363	489	565	382	327	744	4	283	207	383	204	266	400	272	549	358	319	676	477	438	326	389	324	219	258	291	298	351	456	228	267	327	226	318	233
611	110	85	240	132	75	327	53	91	98	113	79	56	70	112	71	146	442	150	66	156	71	78	113	103	84	67	388	173	183	88	-69	119	227	67	72	91	136	33	77	72	126	49	100	35	89	221	48	169	28
612	1225	804	971	1309	616	723	1186	979	1395	346	915	557	928	824	642	802	521	951	617	1411	623	973	1139	1111	962	869	1309	1395	941	1101	710	912	1861	372	805	547	368	759	645	541	934	502	708	621	756	1045	249	1388	1168
613	243	119	152	300	224	188	122	311	156	130	85	-1	176	109	325	139	572	242	158	762	59	200	66	405	140	191	283	53	191	114	268	209	495	136	88	161	-12	89	235	145	337	327	588	59	159	378	22	151	209
614	-196	98	-241	-158	152	-138	-349	-353	-146	-78	-37	175	-96	63	-113	-190	-330	-161	-133	-259	-138	-232	-112	-205	-245	-244	-245	-147	-363	106	-222	-142	-245	-32	2586	-188	-222	-131	131	52	-181	478	-33	115	549	520	244	-244	-204
615	450	38	-76	180	-15	154	136	401	67	159	-117	132	-39	-15	38	-63	246	161	-10	-43	101	-39	77	227	106	3	510	38	122	105	18	-20	453	126	-4	-137	-161	118	89	14	242	22	7	-55	37	123	144	-5	16
616	116	321	87	94	58	113	72	40	201	61	215	37	68	168	110	59	160	70	57	246	217	133	193	135	18	27	147	82	111	77	42	101	42	53	43	50	21	30	40	91	562	87	93	119	54	-12	-76	48	48
617	239	276	610	139	456	206	218	265	263	111	116	142	205	88	268	201	604	62	314	394	128	171	108	151	99	140	372	282	147	269	283	387	349	485	401	96	374	326	284	153	313	134	209	309	329	64	251	481	343
618	-99	1102	782	-592	-74	81	84	-1127	1229	103	205	1001	-143	2946	371	-352	-476	2638	-141	-244	868	-430	-668	18	1511	46	-436	-642	281	-218	579	915	-273	-255	1600	-332	-380	866	1864	2256	1717	2028	2035	3914	22	-278	1298	1115	699
619	-44	-13	-57	12	132	-30	48	-70	27	-43	19	-48	46	72	78	-79	-10	2	73	73	94	-5	56	269	2	112	4	-26	46	95	-37	114	65	89	103	34	-244	21	27	-25	18	109	189	2	97	-66	45	16	50
620	417	401	358	391	428	138	204	101	306	96	440	93	621	564	527	380	913	490	300	1311	916	197	134	502	157	210	300	337	405	165	256	850	249	468	173	243	128	157	145	221	507	463	469	292	102	247	256	611	324
621	-214	808	148	-265	-227	-14	-357	-358	-286	-153	-279	-337	-295	-310	-221	-234	-199	146	-255	-591	-162	-204	226	-300	-204	-385	-212	-212	-250	35	-205	-316	-267	-233	-110	-346	-309	-171	-207	-186	-225	-295	-158	-242	-249	-288	-213	27	-288
622	602	577	880	695	839	627	823	337	838	623	608	268	754	426	553	657	286	693	520	1265	333	966	393	977	635	599	819	883	393	385	640	581	1192	560	57	389	276	264	318	545	725	591	673	636	571	692	421	1099	519
623	3121	2988	2611	2078	1527	1945	3612	1988	2294	2145	1625	1427	1592	1417	1927	2066	2454	1319	1525	2217	842	3043	1257	1730	1435	1935	3126	3106	711	1769	1248	1901	3572	947	1951	1380	1266	1827	999	2116	1426	1407	2244	1832	2231	2631	2170	2211	1173
624	507	253	980	393	344	-112	221	-113	98	394	40	2	304	307	320	300	452	249	365	282	-127	209	142	-165	198	534	12	45	-307	13	-287	212	433	519	4	262	13	138	-49	124	237	197	5	-98	369	440	-119	163	-69
625	-45	49	31	-103	176	-64	-5	-155	49	12	68	5	74	35	81	29	13	-5	-20	266	28	-60	-18	56	-47	-83	-54	-140	5	-33	44	39	-173	70	62	-20	37	7	47	-39	-18	141	105	-20	12	-33	33	-41	-100
626	-590	-20	-205	-272	281	-238	-411	-803	55	-416	-250	-475	387	-86	329	-96	73	-294	-80	287	-423	-510	-127	243	-169	4	-1012	-255	-483	-158	-60	238	-873	-114	-211	299	201	268	-188	-87	-307	86	292	138	99	131	655	-309	-603
627	403	208	268	381	467	394	569	64	373	105	167	319	1273	500	601	335	596	77	311	893	343	-2	182	639	132	128	-425	-79	310	459	327	1619	-152	691	341	584	558	932	245	138	-26	1190	713	185	189	375	1306	76	403
628	453	286	449	184	233	426	574	184	399	57	423	146	95	120	165	160	363	182	18	216	49	244	-72	206	130	131	372	-258	14	230	10	129	391	192	12	-72	-13	112	126	60	59	314	64	128	272	-206	175	67	603
629	587	142	429	412	475	414	596	809	566	19	640	165	695	1008	460	524	549	178	485	931	817	122	-43	823	244	444	3	190	297	183	420	741	66	421	127	398	139	128	-58	194	318	317	464	401	204	345	152	180	238
630	-126	2267	205	-156	203	1536	-252	-346	451	660	20	-10	-89	1367	131	-54	-147	-78	-173	-26	-72	-111	163	-29	-122	-27	-117	-164	180	19	-195	-232	4	-61	966	-60	-143	-140	-165	67	-65	276	-139	3063	1283	1148	284	64	40
631	330	350	575	231	226	209	344	262	198	258	276	215	297	257	183	334	195	188	193	449	34	270	151	442	255	316	212	589	62	186	73	310	296	164	269	219	234	231	146	318	349	159	294	351	147	404	137	340	151
632	186	369	83	86	103	71	50	-67	117	173	233	97	122	157	60	40	75	-14	57	357	303	197	115	114	5	-42	68	-77	144	58	63	79	-91	34	67	41	7	51	24	65	173	214	69	147	-72	64	88	210	110
633	168	87	208	610	71	597	216	524	168	99	230	123	42	253	32	10	27	59	41	178	334	109	153	601	119	76	-17	123	616	-17	65	94	-29	53	31	22	325	-57	52	118	129	-7	40	106	-2	20	68	160	86
634	222	194	331	249	309	28	122	317	157	25	170	37	29	51	346	339	20	121	49	633	248	64	129	208	28	83	109	65	-55	-31	170	137	339	147	-48	289	17	41	199	37	94	676	141	144	22	236	-20	-21	96
635	487	588	552	334	898	252	362	481	1041	254	880	1225	2138	570	826	469	2115	624	616	2216	2274	449	416	795	1187	504	261	258	291	746	941	2366	424	579	769	548	942	756	250	677	866	995	1337	1295	199	793	663	480	524
636	540	252	363	290	309	382	572	896	655	115	368	250	397	411	368	286	351	308	251	441	291	406	294	498	500	269	132	509	149	183	447	485	696	278	379	327	487	85	380	184	231	551	414	173	349	530	231	267	413
637	118	-139	155	111	345	-83	-194	-2415	-113	-372	193	4	186	-43	177	331	-1290	290	-506	-655	-417	141	104	-133	-640	305	71	388	-1010	-559	-258	-434	128	-7	-504	34	54	154	125	220	237	-425	34	-396	217	419	-7	-641	-995
638	207	165	-47	54	-43	-145	15	-152	172	-76	86	-67	-71	98	-65	-31	281	193	-28	62	41	88	-102	6	108	15	342	55	-121	11	-75	-3	160	-90	283	-121	-121	-88	-41	-46	-63	52	113	-122	-79	87	94	0	151
639	-228	-15	-496	-223	125	-250	-384	-307	-276	-318	-63	74	481	91	147	-286	597	-114	-147	-4	-51	-175	-129	282	335	-3	-126	-260	54	69	6	559	-515	-37	-139	-315	-114	-57	102	63	-18	395	243	-69	22	-275	294	-365	-151
640	770	1162	2020	785	939	1749	680	1054	1888	1380	1302	628	1216	1734	1144	872	2837	1144	899	1378	1484	550	872	1084	983	1057	1017	808	629	875	1195	1934	1750	1346	838	1393	1128	554	638	507	655	1353	943	467	961	1339	887	856	613
641	110	285	-17	23	62	145	137	301	263	108	18	125	77	47	14	22	154	96	248	233	176	22	11	73	163	67	156	43	213	134	14	199	64	111	173	-149	-117	121	-4	97	122	98	60	94	144	110	71	37	81
642	500	675	866	392	529	222	463	725	596	218	328	294	403	497	362	684	751	529	439	652	584	553	400	517	853	586	999	567	373	435	552	705	834	330	355	398	451	444	375	594	550	447	514	411	436	515	307	849	622
643	180	243	82	132	133	71	141	241	161	136	50	68	105	79	132	72	231	95	107	151	19	57	127	129	120	115	251	82	136	27	170	138	175	23	100	56	20	40	9	66	82	65	74	59	94	74	122	161	161
644	-51	-25	-315	-164	166	-156	-389	-226	-162	-329	-175	-48	238	-214	119	-35	560	-150	-234	390	137	13	-15	160	-41	-122	-297	9	-336	-301	2	38	-418	225	-57	69	-70	-101	-196	62	90	159	66	13	-207	-141	132	-250	-485
645	-254	57	3	-254	10	-216	-208	-190	-145	-138	-46	-166	-123	83	69	-39	-70	-35	-74	-75	3	-119	-9	43	53	-25	-178	-168	-35	44	31	-44	-149	-29	124	-47	103	21	-3	15	-94	69	3	17	-147	-169	-61	11	-38
646	833	1365	712	386	417	487	114	-71	1008	5083	680	347	1161	510	606	328	459	97	623	1492	1455	836	617	490	8035	1134	333	1178	109	23	851	2375	225	763	874	809	8541	804	399	2010	1185	1091	1219	602	42	499	294	262	81
647	220	253	334	76	315	257	38	89	88	183	130	129	127	255	188	53	120	212	188	447	144	132	172	240	240	65	35	-123	60	51	71	281	-37	86	91	145	104	70	176	17	-15	299	343	121	227	-56	165	123	79
648	584	596	823	314	455	547	514	487	679	657	562	228	524	415	248	505	588	541	309	780	349	580	492	667	746	503	564	772	487	258	489	579	878	198	185	188	189	251	238	409	486	257	464	399	332	489	345	796	617
649	848	1489	2449	914	1973	1159	430	887	2524	1841	1198	629	3108	1561	1634	1799	2771	991	1516	4229	1557	796	630	1408	640	574	1315	835	860	1180	1721	3251	1431	1358	533	1117	538	857	566	537	778	1340	1606	705	1330	669	1090	634	788
650	1073	587	1060	1169	690	967	1458	1043	992	287	625	116	55	732	899	375	428	309	246	411	167	882	1592	196	674	385	1207	171	633	768	338	263	1391	419	79	584	91	633	72	635	187	286	633	178	269	278	993	328	550
651	-268	-320	54	-362	-118	197	319	125	219	101	-534	-344	-206	-620	-286	-99	167	36	-3	387	2	-119	-22	222	-475	-245	427	313	118	38	136	-765	-621	-81	-105	-77	108	-114	236	-166	-322	-5	242	-192	384	20	-574	-285	72
652	108	-18	104	5	-70	42	73	34	61	-13	67	-10	-35	46	-5	-32	-35	39	-99	-15	14	73	64	-56	56	-24	31	-38	36	-37	-79	-36	-8	-46	117	-50	-66	30	-6	-17	-18	-44	-49	-2	4	-30	-25	25	64
653	49	50	-49	84	-31	0	104	74	84	-12	-44	57	24	-32	-23	88	109	10	-22	-64	22	44	37	-79	-30	8	112	60	-26	-9	84	-42	310	28	105	16	72	11	74	33	-41	54	-66	5	7	-72	175	44	38
654	1381	1567	1421	2426	956	746	1347	2173	1852	951	1031	524	546	1000	2183	3340	294	406	1834	2179	514	1408	1470	1461	559	1258	1722	1202	748	554	565	975	5847	1754	1485	1079	717	1075	844	800	1014	559	1108	407	763	2616	1339	581	507
655	247	127	475	157	182	167	401	302	384	67	143	125	114	145	63	272	224	159	99	164	196	177	355	197	185	239	378	267	250	282	258	189	465	100	199	204	222	112	85	173	154	209	127	122	102	404	53	93	310
656	289	540	396	215	376	0	315	79	437	77	235	260	246	179	81	177	100	130	106	716	437	65	102	270	197	112	-323	275	289	167	163	502	74	178	175	210	261	103	63	90	138	287	223	89	69	10	94	46	170
657	-49	35	141	72	5	120	-11	194	111	118	18	-31	111	-21	66	32	54	-4	22	255	33	102	131	-57	69	54	217	55	106	98	69	78	169	62	7	28	103	17	69	30	-59	80	50	46	47	180	27	125	-129
658	223	183	273	229	650	-55	104	80	188	1020	85	-41	656	270	252	146	114	80	-9	620	573	158	-30	532	790	57	-126	62	33	-76	256	1981	34	219	213	10	247	254	0	55	25	322	61	-1	57	-23	-33	-114	-144
659	-55	-10	128	-18	48	186	-28	94	-33	111	-49	-61	33	-178	-3	56	14	-1	120	197	218	-231	-112	-8	-36	77	17	19	-89	103	-50	122	71	-25	-52	-51	14	-1	-37	-7	-9	50	124	-14	32	-61	20	-65	-21
660	107	370	101	40	78	65	129	79	107	161	182	53	229	175	48	117	234	80	49	273	131	48	-9	176	55	77	223	152	127	116	84	144	102	92	52	23	61	70	34	90	182	111	225	188	27	92	63	137	74
661	181	94	125	136	104	71	164	232	-1	62	14	56	393	138	96	78	308	49	80	411	304	150	148	203	38	200	109	127	105	174	388	326	111	59	151	109	103	89	23	97	123	126	222	171	97	92	86	82	36
662	12	-42	-176	-163	-151	-72	-107	59	-228	-65	-86	-74	-183	-105	-3	-154	306	-67	-90	1057	-31	-10	-148	-188	-60	0	14	-57	-102	-70	-33	-176	-8	-169	38	-117	-176	-98	-58	-48	-145	-162	-79	-80	-119	66	-83	-143	-69
663	655	197	367	241	714	227	411	745	359	235	250	199	637	207	462	382	759	331	360	672	940	393	397	563	321	423	608	605	831	264	716	679	552	277	507	351	456	164	165	214	413	354	285	183	669	496	287	704	310
664	575	623	664	639	440	501	643	773	581	340	298	321	626	415	641	461	596	539	303	1091	429	538	402	837	454	455	563	989	607	496	491	609	790	464	254	544	534	329	297	400	650	644	484	351	469	584	640	498	339
665	494	643	473	295	329	540	225	296	822	403	612	241	419	968	543	386	2003	415	369	605	629	91	514	465	233	420	242	490	46	280	287	536	515	497	120	269	140	316	400	485	481	399	566	645	314	388	205	290	257
666	729	1502	919	1084	1167	1483	1737	1332	827	1264	961	675	530	1275	1140	1264	2293	1097	1040	2000	619	697	1229	1290	1555	1143	1974	926	469	1580	1754	636	2480	1216	1591	1400	1661	1267	1068	1218	978	1103	1246	1170	1108	1508	859	1092	1161
667	754	850	1024	1285	850	745	856	1602	1127	798	1051	561	789	896	786	787	1130	733	1458	1863	418	1285	866	1486	1233	961	560	902	1289	774	1361	935	1141	793	754	338	340	571	855	767	661	515	1112	793	1031	1238	180	1685	1555
668	4346	2554	1855	912	1019	1184	873	2118	3045	2118	2520	970	4856	571	927	3013	2592	1641	5276	5344	2076	1741	1341	932	2274	3045	793	2928	1057	2947	1193	1735	1340	1056	2011	4824	2046	997	1016	2188	4227	2045	1994	1034	554	1194	2821	1276	634
669	-149	-588	-874	-225	-288	-257	-399	-1284	-329	-160	-330	-179	-170	-348	101	-256	-597	-256	-298	-38	318	-312	-364	-420	-130	-275	-1347	-912	-421	-222	-107	-193	-1260	-81	-360	-127	-119	-124	-18	-34	-459	-188	-46	-117	-411	-334	25	-771	-428
670	52	-9	185	33	80	26	11	125	69	48	10	27	231	-29	52	-32	72	352	98	549	194	79	20	96	23	82	39	19	99	37	58	549	76	125	16	47	-34	112	1	-18	139	150	132	38	117	146	7	7	50
671	773	594	423	483	849	318	630	425	573	135	242	367	4371	253	2080	631	924	159	864	4185	179	398	235	1590	722	1516	974	1088	797	1146	1132	3154	1366	1269	603	766	1109	1711	292	608	737	1052	1998	637	679	561	2186	870	141
672	-226	385	-198	228	342	94	33	-380	-50	-66	-189	-183	849	206	552	201	1182	261	40	1165	-319	100	-203	287	-225	-31	-90	-207	-131	-52	298	449	-353	336	-93	123	213	-64	-112	-25	117	594	636	62	252	157	0	-6	194
673	268	584	493	288	495	177	349	127	750	361	536	103	463	499	460	317	425	330	243	1052	438	286	444	414	258	400	276	137	196	340	399	426	272	349	163	254	312	241	157	313	362	581	526	393	264	190	299	234	334
674	141	1108	164	-153	553	508	43	-22	926	56	554	80	490	889	826	879	547	625	369	1746	324	40	41	986	176	159	369	241	96	331	764	1076	602	471	295	263	437	449	171	460	510	638	1296	752	444	316	122	72	336
675	-66	-68	-95	-122	-85	-32	85	2	-61	-61	-127	-70	-66	11	126	126	53	-60	-32	52	7	17	55	-167	-90	-8	-162	-202	87	-69	-79	46	-106	57	-50	26	154	-33	4	31	-17	25	-64	-64	-17	-133	-10	-35	45
676	1380	1214	1889	1138	1721	997	1508	634	2506	615	840	567	1755	2071	2075	1388	1573	775	807	2616	254	197	818	1789	988	2194	602	1378	765	558	737	1722	1458	1875	783	818	1067	1865	649	2978	1881	3077	3033	1256	1348	1292	1448	1508	726
677	601	566	675	495	710	590	660	461	527	880	641	380	911	642	728	695	730	574	688	1076	436	635	543	621	302	526	869	429	600	461	371	704	575	727	432	723	293	638	445	832	862	991	826	746	496	484	477	764	519
678	742	398	627	313	703	416	480	392	1024	393	416	135	1148	578	626	534	854	475	680	404	447	268	277	552	252	305	265	253	360	258	540	1088	462	453	336	527	232	196	122	352	423	618	526	84	354	520	297	326	348
679	1149	534	992	857	737	478	638	1077	914	323	393	432	883	465	717	763	887	722	736	1500	537	1799	518	908	611	777	402	808	714	514	731	872	559	433	567	415	360	399	464	775	687	985	806	754	394	713	726	532	605
680	-31	18	35	-12	7	-5	-28	-5	34	-9	68	-18	24	43	-48	21	-25	61	15	53	33	-24	20	11	37	-13	-42	-7	23	-27	-65	0	58	-70	48	-37	-70	14	47	12	11	6	4	61	22	2	58	-7	-72
681	111	62	-7	25	79	21	55	136	29	26	-16	-27	174	92	11	122	178	79	49	233	21	-31	5	64	-25	27	92	-62	98	59	92	349	4	39	91	-2	-52	93	3	4	9	90	98	-9	64	66	116	-15	67
682	265	155	239	276	255	96	278	215	238	89	155	41	359	99	264	210	297	114	176	374	257	100	189	359	59	200	120	294	202	4	159	273	155	255	276	117	153	170	86	189	99	269	288	77	207	123	238	173	156
683	3330	208	2147	1016	693	1436	463	3829	1504	263	192	1215	1511	1382	828	833	216	192	758	1049	1798	2644	1029	308	711	590	660	878	3771	416	376	671	508	256	329	1365	567	589	567	397	931	672	886	201	464	509	793	354	230
684	-170	-152	-258	-270	-55	-126	-164	-248	-288	-190	-158	-165	-159	-113	-52	-308	-124	-102	-173	-87	-29	-230	-98	-164	-111	-200	-251	-178	-120	-175	-327	-200	-131	-79	-81	-272	-302	-88	-77	-122	-171	-76	-174	-137	-262	-200	-183	-242	-91
685	33	197	-156	36	197	88	15	110	139	49	504	-40	664	126	200	203	220	76	349	503	218	54	-22	229	-86	62	-90	-60	-16	219	174	486	-68	338	108	263	9	116	38	103	223	359	189	216	-107	54	162	-50	-137
686	-18	-108	-116	-204	24	-138	-181	-218	-58	-66	-95	-4	-52	-12	48	-27	-75	-17	-47	17	-27	-87	-77	-150	-18	-85	-192	-106	-188	-64	16	-93	-1	-100	-86	-167	-153	44	-106	-42	-55	21	-21	-13	-9	-64	-58	-149	-108
687	-116	-121	-122	-87	-147	-144	-68	-173	-76	-18	-115	-110	-82	-132	-133	-124	-301	-77	-80	-131	-154	-90	-102	-159	-129	-145	-79	-113	-121	-102	-199	-193	-183	-75	-240	-211	-274	-49	-103	-78	-138	-91	-62	-73	-79	-221	-58	-247	-211
688	-193	-352	-222	-236	-115	-384	-389	-410	-301	-247	-223	-308	-264	-374	-84	-230	-762	-277	-250	-387	-253	-111	-220	-128	-212	-91	-575	-308	-395	-447	-92	-140	-703	-333	-329	-303	-166	-116	-180	-74	-311	-543	-376	-186	-259	-236	-20	-620	-399
689	562	634	483	342	617	248	351	991	274	510	281	330	692	356	287	256	860	554	515	623	156	247	541	341	517	552	920	791	338	236	479	427	670	407	-74	269	275	245	7	336	661	207	414	456	359	607	162	620	759
690	400	214	684	266	689	208	389	604	360	344	435	196	405	264	193	184	259	556	223	450	460	326	245	438	500	571	583	794	579	139	376	287	670	327	79	232	162	327	255	313	458	244	450	243	364	2067	358	460	418
691	-328	1002	-66	-602	560	142	720	-460	508	97	215	27	604	903	220	120	2364	-128	704	-205	-173	-617	1	253	827	585	-408	-200	352	647	622	489	316	652	360	320	1054	863	-157	249	27	622	458	95	501	-33	1253	1180	295
692	329	270	333	311	336	220	241	787	355	234	374	142	341	435	308	313	297	263	84	567	196	486	383	607	434	445	478	424	455	327	334	291	478	189	228	234	310	228	199	366	309	392	239	275	272	260	269	335	466
693	46	207	76	42	217	-56	28	730	381	9	220	-38	101	12	95	375	56	194	263	4067	482	401	-5	169	64	200	131	60	13	106	92	-27	153	36	290	127	6	184	170	111	-18	34	86	32	2	79	7	83	-76
694	242	270	401	-22	274	-26	90	212	-5	24	348	1	180	63	225	184	551	320	240	446	149	121	-41	601	234	89	28	429	55	85	254	320	81	372	74	256	246	95	15	145	75	271	219	129	-29	309	-104	63	-4
695	234	197	687	639	385	640	578	1149	474	1	491	54	973	311	431	838	576	106	1390	1451	162	401	248	545	98	1411	704	294	472	348	867	1105	1148	496	93	-83	425	564	129	785	206	870	1369	43	409	545	231	-284	-211
696	-25	140	-99	-19	165	1	95	137	270	8	37	-11	430	135	176	85	556	70	56	458	142	-44	93	145	-50	168	64	-4	32	128	107	338	-7	178	93	23	-31	70	46	47	89	288	198	42	14	-54	10	-98	-16
697	619	242	760	865	787	231	772	788	773	142	336	-66	1224	972	1217	712	2151	160	877	2658	356	146	182	1100	-186	342	28	152	363	59	701	1473	410	857	341	468	317	34	58	106	-65	974	1392	400	142	401	305	65	60
698	319	511	246	-25	779	200	60	160	224	451	198	415	726	641	579	712	695	211	708	2135	-13	2503	47	189	733	1717	-39	475	161	4935	605	768	598	374	966	388	357	590	904	516	1046	1129	1186	1128	209	357	381	384	100
699	93	-45	891	28	948	177	77	205	1664	553	214	116	42	2348	627	654	183	64	194	469	592	1039	216	228	32	249	416	161	149	403	-54	18	680	270	199	7	89	101	606	371	305	96	390	505	67	180	-76	11	105
700	-48	-68	-70	27	336	-48	-25	-55	-49	-70	-81	-54	85	55	86	189	-61	-79	22	180	1350	-9	-132	92	-38	-46	395	-84	39	-8	21	93	94	134	278	88	58	-4	321	-3	70	130	91	17	-102	-74	17	-153	-149
701	254	117	85	95	218	72	179	206	124	108	58	33	470	164	207	234	367	171	265	572	149	100	32	266	95	74	112	222	115	178	329	510	86	197	262	106	80	51	66	102	110	175	394	53	129	169	238	29	72
702	177	161	268	143	151	136	245	179	266	210	179	71	178	145	151	183	133	171	198	200	119	57	28	253	111	177	67	12	163	71	235	283	160	67	40	81	160	36	64	150	135	87	239	96	177	252	83	215	134
703	719	195	132	745	813	76	993	476	-78	214	-100	182	556	-51	665	709	398	448	527	1647	319	485	34	519	357	673	1110	704	490	450	579	1055	829	829	463	827	479	786	546	118	263	1555	502	257	728	927	922	187	382
704	-578	-550	-489	-462	-376	-505	-836	-556	-37	-155	-385	-488	-209	-408	-378	-105	-441	-74	-217	-569	-489	-903	-531	-222	-359	-158	-538	-593	-445	-257	-258	-343	-877	-266	-423	-219	-443	-197	-413	-385	-195	-326	-114	-223	-299	-126	10	-580	-519
705	-8	-50	127	89	93	179	52	23	111	-219	103	-66	104	200	29	264	184	7	83	-49	-88	-132	-178	116	-100	134	-305	-260	39	-188	56	-194	-115	3	-144	-148	-83	47	-44	154	19	140	242	329	44	43	-99	-69	206
706	-748	-195	-418	-37	252	-97	-77	308	-238	-147	-112	2020	-10	-201	-44	-182	-216	98	-104	-532	38	57	-387	-19	3548	-107	14	-627	4	-294	117	165	-255	-333	-189	-154	-359	37	-232	-159	-234	1093	-415	-114	107	-512	1039	2228	264
707	228	444	91	232	260	90	203	223	155	224	150	212	422	239	330	225	236	269	254	421	684	838	136	270	28	256	289	207	96	95	201	368	163	194	153	111	-4	147	108	278	294	264	398	583	99	211	183	251	180
708	820	313	870	560	562	499	920	1004	723	315	605	-4	325	503	433	713	272	513	397	415	106	646	151	737	485	330	569	603	174	116	332	701	784	353	185	404	139	375	-81	294	545	203	534	397	356	535	345	387	622
709	153	104	109	313	237	32	243	242	146	93	19	10	193	204	243	256	283	116	342	659	321	109	62	176	87	157	-43	111	221	251	142	203	179	361	353	157	15	135	61	83	65	231	262	89	134	190	157	75	52
710	814	1290	1269	988	674	842	1120	971	1119	954	1293	478	1291	1078	980	961	975	518	1063	2041	427	1628	955	909	463	542	577	1351	686	1198	1025	1269	1125	403	485	526	529	710	264	763	1002	716	1251	911	541	520	889	648	1137
711	970	292	870	656	512	337	1448	262	356	316	358	250	1100	432	443	974	675	726	463	593	356	923	265	748	209	485	355	898	528	453	382	1264	1058	211	144	339	289	431	714	490	255	793	930	287	401	620	340	738	807
712	0	73	-177	20	81	-26	-70	-133	-38	-20	221	-45	133	37	33	21	13	73	42	241	441	95	-45	105	-126	-104	-178	7	-109	17	52	133	-131	136	-129	56	-38	37	-37	103	190	156	44	328	-97	-126	-30	-142	-165
713	1199	467	1088	1711	550	1123	1729	1245	1251	1004	374	924	971	432	562	792	493	903	492	766	148	918	834	1031	911	705	120	936	1182	293	567	1242	2	322	79	518	598	831	832	301	757	354	626	399	933	919	429	1321	1267
714	-139	-82	-383	-123	57	-23	204	214	-113	-48	-69	-10	-10	-25	-93	2	294	-36	-73	77	-83	-83	-41	-138	24	-188	-104	38	-20	88	-12	-58	-209	-43	14	-5	212	-23	100	-69	-26	84	48	-99	-29	95	38	-158	-33
715	-5	73	163	41	63	76	45	344	123	165	40	25	125	213	-5	86	-150	73	30	264	-12	112	79	-61	30	96	170	-12	204	85	130	99	68	-10	-177	88	228	-73	7	65	122	70	41	31	137	108	5	344	151
716	136	105	233	190	209	174	220	385	217	193	232	135	295	199	170	315	592	174	94	666	428	234	140	284	288	169	328	178	207	139	289	305	266	241	112	171	182	92	91	235	262	268	93	238	199	190	157	284	298
717	305	307	143	282	389	48	201	314	248	82	164	37	492	392	367	236	689	281	191	903	617	36	106	579	163	164	209	91	272	188	208	469	71	342	218	317	533	119	185	181	35	662	423	238	102	195	122	144	165
718	233	169	182	155	313	138	221	185	292	131	121	94	418	87	226	285	73	236	268	1286	857	273	180	160	283	397	137	398	117	204	382	472	259	148	386	170	410	271	32	194	451	410	448	471	89	301	96	204	161
719	90	138	158	205	213	154	8	95	124	103	47	24	459	194	114	119	619	98	83	447	276	-57	70	293	76	76	-29	-48	115	109	29	405	31	305	124	-188	-493	119	74	20	102	219	138	77	47	213	157	47	24
720	244	269	168	344	171	32	341	347	165	-100	137	123	127	223	250	348	267	353	206	553	333	282	100	346	115	267	240	84	0	255	172	386	289	248	180	209	31	15	-18	220	619	272	229	164	102	285	305	35	-16
721	120	252	261	306	464	87	216	169	279	78	416	53	564	316	421	313	841	257	240	1163	597	193	115	596	129	75	363	21	139	179	336	479	94	364	43	60	210	77	24	131	138	561	331	295	174	51	30	123	302
722	1168	1833	1448	1234	1375	990	1508	2182	1991	1442	2609	672	1478	1696	992	1349	1653	1626	1494	3237	792	965	1005	884	1679	1346	588	960	313	3629	985	1775	1008	820	2079	1312	913	1093	666	1321	1707	1305	1953	1151	1023	1073	363	2203	750
723	220	273	1	391	635	346	504	463	359	298	700	-17	772	347	767	489	657	169	488	1730	272	408	260	848	197	678	312	294	319	532	817	1064	368	638	278	604	378	297	-43	509	326	510	617	1096	249	440	381	446	206
724	336	252	321	606	827	229	457	227	899	373	509	84	441	466	525	500	624	545	607	1302	79	155	250	600	264	531	316	178	408	236	479	556	504	391	151	252	329	168	304	187	263	495	656	297	504	337	165	440	180
725	-1896	-2222	-427	-3261	-1157	-2329	-2332	-2211	-2816	-2009	-1949	-1815	-1242	-2072	-1679	-1682	-3936	-1767	-1587	-2678	-1372	-2401	-2317	-1615	-1335	-1373	-3149	-2710	-2340	-1328	-1548	-2080	-2305	-1530	-1468	-1086	-1643	-831	-1353	-1649	-1379	-1612	-1603	-1477	-1525	-1138	-1090	-2689	-2212
726	399	399	366	383	398	208	273	439	333	243	320	44	566	327	342	422	819	289	441	1512	83	75	132	436	131	263	378	161	333	247	525	638	302	317	300	250	179	223	211	268	181	350	434	96	344	458	213	397	254
727	79	-34	70	26	160	-56	48	-89	65	-130	144	11	182	53	51	120	75	251	110	-83	1	-146	-49	36	-18	-20	-143	-70	-146	-52	69	259	68	165	48	63	53	85	-44	-29	-54	271	405	85	142	-12	132	-90	-180
728	-89	18	11	5	-20	-40	-95	-65	-36	-62	-16	-47	2	9	-66	67	-28	-42	24	12	7	35	-17	-39	-76	-81	-145	2	-38	12	-21	11	-32	73	-9	-20	-65	0	-46	23	-5	13	53	-17	-72	-56	0	10	-62
729	230	10	85	314	78	55	87	118	70	67	37	1	393	27	293	62	697	-3	82	167	141	64	-75	185	-3	42	57	188	144	77	115	332	29	62	103	69	65	212	146	17	123	260	289	10	109	128	66	52	117
730	1027	1359	1270	1112	742	606	1223	1458	887	772	509	625	605	454	241	1002	970	687	1894	2145	528	950	592	632	607	1279	812	1151	2106	800	874	898	2152	767	665	710	1093	514	491	404	735	532	1051	457	1006	836	564	1030	1019
731	41	155	-30	14	111	-81	26	23	115	21	-11	18	107	-25	-33	-9	49	4	212	120	-44	-20	-47	-53	-2	6	1	101	48	67	25	232	14	137	55	5	-86	75	128	-7	-9	153	224	27	-37	51	5	55	33
732	729	1140	950	670	792	946	683	2060	809	822	612	1115	675	1146	691	551	591	552	1268	1298	444	530	1200	541	204	464	350	1262	1554	508	437	580	622	718	533	747	142	708	527	698	666	646	699	730	511	419	752	1955	1702
733	-121	-16	-132	-122	-149	-254	-33	37	-90	-86	-69	-127	-66	-92	-75	-65	-258	-72	12	-185	-93	-58	-87	-85	-73	-113	-143	171	156	-143	63	-136	-66	-48	-249	45	-83	93	24	-128	-153	-131	-185	-170	-44	-25	0	-73	-67
734	86	135	578	156	226	144	104	335	424	71	92	-7	392	179	200	266	648	146	63	556	331	13	-24	392	166	141	87	313	98	-22	321	393	76	125	139	-10	26	109	133	144	159	365	393	88	-2	30	10	324	175
735	652	1100	351	50	165	72	-102	208	882	373	57	35	400	4797	198	1557	238	480	422	100	272	41	330	166	143	637	287	243	92	389	477	101	356	61	-31	277	327	69	233	1586	671	435	1188	731	57	375	43	192	177
736	420	176	286	348	270	231	216	292	305	159	292	109	610	298	212	409	452	206	276	633	287	130	180	441	168	171	195	154	344	135	424	782	212	117	216	91	136	54	68	161	199	148	251	249	172	321	223	227	372
737	279	148	399	439	203	266	292	380	311	243	288	275	157	282	230	307	152	172	223	218	357	218	568	199	188	191	330	280	603	223	266	257	349	125	240	127	366	75	171	212	211	194	170	170	174	190	231	327	245
738	287	-16	407	-220	-40	-37	-127	332	-62	-169	292	-255	-111	16	-81	29	-52	-74	73	100	258	380	-214	-107	121	-87	-53	386	-203	5	-8	290	-84	89	-28	35	112	147	-47	3	-55	-69	55	84	44	-28	40	-73	127
739	233	357	293	363	160	81	677	769	466	155	230	208	197	259	189	32	166	193	234	285	434	330	246	414	281	121	264	330	1136	172	226	307	163	336	185	206	160	249	204	4	103	245	239	104	52	126	183	282	637
740	140	158	144	55	22	167	213	67	273	8	111	71	124	117	222	105	91	30	85	156	359	100	104	255	-18	60	122	89	101	91	56	207	85	25	52	139	262	112	99	87	35	134	306	62	-32	36	10	20	108
741	1001	870	786	1010	840	681	1275	1328	1188	696	353	806	65	648	826	560	1130	787	-57	1193	446	1127	1041	479	869	395	1333	523	568	808	493	454	1762	544	793	653	699	630	453	238	713	287	720	314	189	744	846	814	536
742	24	-174	11	-138	-2	-87	77	-188	79	9	26	-132	-5	111	10	74	277	66	44	132	1	-18	-136	-6	-35	25	7	-120	76	-253	-86	-96	45	90	19	-214	-65	82	-213	42	-7	125	32	44	54	59	27	27	100
743	110	91	82	102	68	197	72	104	150	18	93	43	78	187	81	65	121	79	29	207	346	-14	136	104	83	19	78	72	187	40	-14	161	153	86	40	-63	-18	56	38	51	46	48	79	65	67	154	91	69	86
744	503	789	579	283	656	256	238	388	629	314	1135	217	1009	777	677	493	1256	372	328	2221	1425	474	243	704	292	279	273	253	390	403	498	1158	484	374	247	410	377	270	165	205	534	1035	709	357	144	169	175	689	339
745	86	124	163	140	140	35	57	55	112	93	227	68	319	199	88	129	469	93	40	336	298	113	37	230	92	106	62	-33	133	45	273	373	32	205	137	91	117	54	17	97	218	103	191	132	84	157	-2	33	-24
746	6251	9740	6722	9620	11512	6271	6443	8965	9981	7923	8510	9858	8126	8726	10442	9351	7127	8475	8545	13644	13331	8317	7295	9803	10695	6992	7742	7367	8037	8357	7172	9132	8094	9666	8220	10933	14236	9017	10197	9830	7966	9991	10261	5957	7087	7436	5767	10096	7641
747	94	112	126	171	176	71	152	191	100	51	114	61	137	79	126	168	133	112	109	283	94	81	176	224	87	93	300	127	136	77	140	211	179	123	2	-68	-63	46	-18	144	146	185	34	113	57	221	-86	72	62
748	251	148	240	92	173	97	161	212	311	-4	201	87	523	176	164	81	309	51	163	264	187	120	94	220	70	159	194	229	62	153	174	610	139	167	182	63	245	85	35	107	197	445	365	245	47	46	216	208	64
749	79	352	265	349	181	320	315	341	69	125	136	206	111	145	141	168	157	191	235	109	156	189	224	190	277	146	164	118	101	123	147	152	507	192	185	197	268	194	136	128	138	85	49	138	202	224	114	247	189
750	61	939	281	169	212	40	43	217	-2	39	321	-25	101	623	105	133	870	85	241	484	635	337	184	279	257	588	81	-33	674	904	268	35	148	-73	560	68	162	88	218	52	110	578	50	168	74	84	175	-53	125
751	952	1490	1277	1358	1403	796	1308	1142	1281	1106	923	2662	1354	957	1080	1001	2108	570	960	1308	879	2520	636	1304	1582	1149	780	1139	1068	2447	954	1544	1240	1020	697	505	1341	801	660	607	2382	2362	2078	982	883	772	821	1643	1293
752	-218	-171	-198	-350	-133	-161	-366	-413	-198	-96	-121	-188	-186	-246	-46	-181	-222	-182	-149	-69	-204	-309	-241	-177	-150	-188	-530	-330	-330	-276	-132	-268	-465	-195	-62	-241	-172	-75	-241	-168	-345	-166	-204	-171	-282	-206	-332	-423	-132
753	314	115	257	199	419	69	194	212	70	128	99	-17	488	301	285	269	739	108	235	1066	193	43	180	348	154	139	64	120	273	146	304	914	1	233	228	54	182	109	97	101	109	421	299	55	129	206	170	122	12
754	690	757	749	792	904	346	628	395	863	506	495	423	972	439	910	731	598	387	602	1158	662	865	336	676	504	444	391	555	827	559	584	1205	354	782	1064	545	477	882	369	450	479	582	1001	584	431	314	864	724	413
755	-69	-70	-740	-35	-292	-556	-16	-259	-765	-150	-323	-340	-494	-408	-373	-282	-623	-328	-298	-762	-378	-623	-550	-189	-506	-591	-117	-347	-301	-410	-437	-377	-914	-247	72	4	-366	-109	-428	-390	-379	-144	-787	-573	-389	-283	-127	-828	-351
756	-30	-12	-85	-44	19	-126	-36	-61	-54	-72	-58	-27	2	3	13	-29	18	-35	-32	93	-6	-40	-17	-71	-64	-68	-137	-94	-42	-66	77	37	-142	-9	4	1	-38	-67	-43	-62	-49	38	-22	-24	0	-15	35	-100	-100
757	351	383	701	263	306	218	455	236	519	293	268	183	293	250	179	404	579	280	237	410	281	379	330	449	246	361	650	502	402	360	399	389	638	178	307	219	417	148	123	333	449	359	377	292	279	368	246	380	415
758	1965	198	579	4881	3383	3	1507	1248	41	365	39	712	7509	26	5394	3809	-68	19	67	1105	9453	4328	-11	4110	5119	7600	3780	2006	1803	3110	1924	10157	7721	3883	4059	3939	6955	3498	3302	310	2047	7873	6504	149	1465	3635	8205	114	33
759	266	173	241	79	185	-19	58	149	256	137	163	45	200	160	186	170	215	23	146	405	189	113	176	239	126	149	233	149	142	254	187	228	152	98	221	124	259	24	139	136	179	247	233	92	54	84	188	111	144
760	161	588	207	82	337	200	55	121	127	272	37	306	44	328	128	133	71	-7	69	-9	126	43	77	177	17	78	137	62	84	189	105	43	88	226	502	51	86	7	117	101	26	204	178	343	187	169	406	728	853
761	-280	-104	-181	-72	-93	-305	-231	-271	-78	-135	-57	-139	-205	-107	-70	-189	-150	-213	-278	-159	-172	-143	-134	-359	-197	-123	-136	-115	-209	-92	-247	-256	-193	-97	-26	-38	-36	-90	-145	-102	-215	-107	-102	-92	-77	-208	-277	-222	-252
762	106	-38	-60	44	17	-104	-119	-175	49	-166	-74	58	-73	15	-78	55	115	20	-33	-13	51	78	34	27	0	14	-178	96	-65	22	193	125	-99	-10	-146	-99	-129	10	-1	-55	13	-40	144	-1	-49	61	-53	-30	-7
763	727	414	558	592	292	638	719	865	481	248	451	455	167	523	234	322	299	175	180	196	286	485	590	364	369	272	557	724	792	211	201	193	582	255	406	306	222	342	437	197	243	198	229	218	267	324	157	566	625
764	-1651	-849	-2416	-1096	-493	-881	-1063	-1052	-783	-452	-1306	-731	-1071	-1412	-428	-1029	-488	-407	-572	-694	-773	-748	-818	-567	-1134	-911	-921	-1600	-772	-535	-874	-859	-2028	-372	-1293	-244	-250	-453	-405	-341	-882	-424	-409	-421	-389	-860	-393	-1544	-654
765	82	-21	175	-6	16	26	-5	100	71	9	7	102	6	-4	-46	63	-26	65	-22	58	69	115	134	142	-31	124	81	188	45	27	-14	29	59	76	149	93	167	-31	37	48	22	56	43	29	7	151	20	66	360
766	108	117	218	152	125	101	146	56	92	111	126	83	107	107	71	26	91	116	86	76	-32	181	188	206	95	109	323	229	137	73	58	187	160	117	4	97	160	34	108	153	110	21	137	147	62	265	55	132	132
767	121	-85	-72	142	74	136	102	376	-105	49	-108	153	-87	80	55	50	-372	-26	45	-81	2	120	201	34	177	-14	-46	-24	108	161	56	-15	-185	144	16	54	132	30	60	18	-15	-41	-78	122	-109	195	124	-59	235
768	1069	1062	575	544	694	464	1240	1232	1075	568	829	548	538	762	817	1124	1505	714	769	1469	765	1109	170	508	739	517	1068	-2	711	261	332	171	2417	546	1288	440	428	306	352	722	799	725	665	606	831	914	752	747	779
769	-150	-121	-327	-139	-140	39	-245	-104	-135	-82	-74	-58	-130	-161	-84	-173	-492	-112	-74	-356	-63	-145	-224	-206	-257	-227	-306	-226	-144	-1	-119	-207	-451	-7	31	-185	-178	-37	-34	-185	-185	-82	-129	-84	-172	-272	-287	-46	-117
770	216	1657	93	970	1372	-103	811	599	1445	223	698	998	1863	281	1356	1343	1511	226	1009	4367	-44	1765	5	1249	470	1904	1032	709	633	1204	1344	1472	814	1025	1136	1119	1441	945	1265	597	945	1833	1506	1106	1085	929	1146	1314	1137
771	67	430	725	447	449	535	265	85	626	212	289	169	238	2314	320	194	514	65	102	219	129	17	393	127	179	205	70	91	286	22	155	338	327	208	242	32	-65	108	109	62	215	301	163	483	342	445	58	266	228
772	184	70	265	130	132	199	42	205	223	26	169	76	263	405	163	270	358	282	104	198	-61	92	142	146	106	119	103	212	98	109	130	268	360	4	288	66	69	99	134	97	63	136	244	100	84	252	162	115	199
773	41	-49	140	150	-10	216	208	209	49	118	-47	25	68	0	42	154	75	86	45	2	84	143	49	-101	73	147	158	434	459	40	84	53	190	53	12	154	155	72	74	-44	102	-14	54	-35	-97	249	-12	150	295
774	1271	3622	1739	2252	3015	1257	1083	1628	3123	1723	2294	1704	1834	1969	2602	2337	1993	1553	1883	6774	3180	1755	1472	901	2533	2510	979	1458	1663	1226	1605	2628	1373	1872	1314	2143	2552	1194	1577	2212	2195	2260	3024	1517	1133	1030	780	2987	1962
775	240	224	230	270	173	323	176	-50	481	190	134	270	315	322	127	189	158	174	327	167	111	228	180	272	108	239	143	236	133	19	161	323	170	112	-4	103	180	272	145	172	21	69	229	149	107	252	-48	228	129
776	153	153	240	87	115	101	146	88	187	65	119	-1	148	168	145	88	223	52	25	174	17	128	157	48	37	81	206	111	40	117	134	179	182	95	146	23	137	2	17	83	137	142	103	103	97	123	-2	102	76
777	-49	-43	-3	-33	-21	-40	-35	23	73	-43	39	91	-28	45	16	81	82	-16	-25	-44	49	-17	-11	-67	-36	31	86	-4	-26	16	-105	-61	17	-1	608	-197	-119	15	24	-7	-9	84	4	-28	47	167	325	-93	4
778	545	491	-190	686	626	391	512	418	963	429	309	682	774	724	568	374	902	438	337	1129	744	241	450	894	1397	534	478	427	427	651	485	1510	696	748	562	216	761	752	320	332	442	1450	911	325	399	355	421	920	492
779	952	629	882	1056	1231	620	1376	863	759	516	504	353	1132	1248	1060	805	1284	872	517	2337	745	499	444	785	436	606	1101	789	794	656	909	1508	1688	801	819	655	580	590	550	441	905	1313	1073	329	589	448	627	972	449
780	25	13	1	13	25	-12	-1	-22	34	39	49	-33	-32	61	59	90	-117	10	34	85	158	14	41	28	-12	7	-26	-43	96	-11	6	45	0	18	16	-84	-18	-11	30	56	-50	118	21	66	-7	-206	-30	91	55
781	1095	5457	2736	1517	2939	2044	1639	1590	5409	3444	6134	1520	2058	1454	1838	1739	2190	1872	2184	7696	3054	2905	2205	2393	2153	3490	1239	2295	1171	3506	1849	1225	1337	1977	1060	2167	2298	1277	1896	2957	5977	4280	4953	4091	1872	669	744	3387	2101
782	-146	42	-180	-31	-17	-30	115	32	-91	-106	-67	-28	41	-141	9	42	115	134	617	1082	9	-69	-74	206	82	-52	-186	-113	-8	-52	344	306	-84	90	372	-99	-61	-5	-105	-124	122	364	22	-106	-79	2	53	-172	-199
783	812	512	983	475	589	270	593	490	842	504	370	221	517	374	322	561	707	615	293	840	241	379	484	895	577	786	884	485	778	410	603	535	1148	286	298	292	284	190	303	513	807	587	719	495	424	620	363	764	620
784	112	17	78	66	29	-37	43	-71	12	78	-3	-14	86	55	39	36	-105	64	37	22	-28	30	0	114	-47	12	35	21	80	13	-37	26	72	37	84	-1	-29	-57	21	49	11	38	38	42	-14	-92	-22	113	7
785	37	-21	67	-11	104	101	26	-127	58	-72	-33	83	228	-54	12	-77	404	16	72	150	-194	126	-203	130	147	25	342	-24	8	277	25	89	168	-205	-103	-889	-1150	215	-74	-48	-25	318	94	-8	112	-51	137	-43	-9
786	62	-20	53	-85	34	-10	-40	-23	-24	-57	-20	-20	-17	-37	-46	-30	-29	-28	11	-35	-32	41	-58	7	6	12	20	77	-38	-63	-60	-20	19	-108	62	-266	-383	-62	-34	-35	-35	-48	-11	10	47	-36	12	-60	-57
787	140	21	-288	-4	-65	-302	297	59	-774	-245	-290	-264	-23	250	-494	-214	333	-140	-73	202	71	78	-303	-96	143	179	139	-173	595	-147	-31	-193	491	208	-230	-164	-642	-20	-215	-557	-310	283	-753	-181	-566	-252	-22	-316	173
788	172	150	368	328	122	202	295	283	209	218	123	143	128	132	90	207	164	58	91	127	163	108	153	163	36	174	240	270	288	47	189	193	427	57	43	127	3	129	71	60	181	147	139	129	207	262	241	206	185
789	2811	2138	3577	1932	928	1616	2885	2229	1536	1271	1637	1438	1999	2617	1468	2067	1428	1980	1101	4148	2569	2076	1698	1900	1270	2917	3531	1472	2250	2884	1550	2611	5776	1534	1471	1432	825	1556	1528	1653	2206	1461	2259	1271	916	1722	1883	2802	1851
790	-278	-84	-217	-57	-86	-74	-243	-154	-102	-71	-102	-84	-116	-148	-68	-63	-136	-116	-135	-146	-14	-192	-148	-145	-63	-77	-114	-200	-57	-24	-44	-134	-286	-128	-50	-140	-173	-44	-78	-92	-214	-13	-118	-74	-102	-139	-132	-131	-144
791	353	526	557	379	524	96	383	278	698	178	674	291	303	277	712	442	108	247	169	285	219	210	398	662	282	314	244	318	248	229	229	589	280	283	341	200	210	73	159	183	413	305	384	613	104	239	119	648	242
792	159	182	102	60	156	58	97	28	210	76	142	80	113	182	76	97	80	91	-15	271	82	57	74	271	81	84	-6	48	77	52	138	189	-15	72	33	26	15	40	52	53	45	235	127	130	94	74	0	90	168
793	-116	107	189	200	-46	142	265	35	65	164	77	50	122	224	-38	-45	167	136	100	89	-56	87	32	-70	9	-92	139	-7	139	208	100	194	158	48	91	-41	-14	109	126	12	-87	87	-68	53	157	46	-73	85	88
794	1495	1804	2927	2422	3339	1927	1560	1196	3430	1991	2636	1442	1789	2107	3859	2020	1979	1936	1778	3861	637	920	2262	2398	1367	1004	1741	1120	1011	1208	1626	3655	1682	2218	1752	2062	1920	635	1533	1463	1210	2081	3496	772	2419	1727	1309	1097	990
795	520	541	739	696	568	618	559	580	459	422	593	515	430	715	554	665	840	467	407	775	402	384	465	718	476	415	827	378	569	312	506	323	1041	729	841	502	593	489	997	555	370	596	561	536	449	903	381	519	288
796	106	78	-19	-41	24	-12	-57	166	14	-55	100	11	43	68	-44	-72	-1	24	-28	28	51	43	0	98	56	42	-71	57	-7	45	39	64	65	3	2	29	-68	-102	32	50	107	-13	78	46	-97	172	15	-119	-45
797	-301	-104	-277	-103	-133	-163	-220	-280	-280	-111	-173	-122	-147	-145	-93	-148	187	-74	-98	-284	-72	-213	-207	-217	-240	-200	-189	-197	-240	-53	-16	-111	-292	-29	-146	-105	-21	-75	-140	-145	-262	-86	-275	-111	-142	-288	-205	-275	-105
798	1016	3283	2304	3518	5323	1932	1712	988	4224	3252	2556	3138	3790	2767	4679	3639	4352	2817	2296	12559	8189	1213	2327	4387	2531	2226	2142	1682	4028	1462	3593	4661	2773	3093	1572	1252	3640	2147	2984	1542	1718	4744	4394	2402	2865	1581	1860	3465	2144
799	2180	1563	2438	1837	1113	1445	1802	2446	1761	1256	1196	1036	1299	1361	1134	1528	2002	1569	1241	2133	1070	1472	1440	1395	1667	1595	2561	2273	1560	1545	1374	1473	3219	818	1372	925	1143	547	782	1311	1546	1035	1354	1154	1070	1758	846	2181	1724
800	252	284	294	501	154	517	289	532	265	80	164	285	138	331	165	213	413	187	228	383	258	379	387	236	365	249	361	96	449	452	308	210	514	242	382	143	160	255	280	47	175	231	182	113	242	396	282	169	351
801	-160	-20	-388	-141	-88	-165	-285	-215	-224	-149	-187	-112	5	-310	49	-180	-370	-20	-90	-81	-263	-75	-265	-160	-126	-23	-272	12	-244	-89	-119	-93	-203	-162	-84	-87	-99	-90	-55	-127	-91	-112	-73	-39	-157	-146	-226	-185	-319
802	928	606	1153	893	448	704	858	1352	948	455	574	444	482	621	549	362	1122	469	440	438	334	714	687	476	457	516	863	704	705	363	619	553	1054	269	235	398	439	197	180	397	463	473	382	298	466	345	261	916	620
803	-213	-146	-806	-805	-159	-160	-865	-970	-294	-234	-178	-477	-113	-224	-175	-148	-1196	-262	-311	-268	-179	-139	-585	-514	-244	-310	-1032	-304	-266	-601	-63	-237	-404	-300	-156	-358	-506	-85	-242	-540	-467	-237	-211	119	-187	-293	-294	-843	-593
804	3767	2890	5996	2810	2206	3881	3723	4072	7439	4791	4406	1379	6964	2056	3688	2976	3182	2209	2580	10857	1535	4624	3710	5079	2302	2106	3307	4057	1585	3600	2425	7275	2787	3367	2271	5083	2621	2388	1768	2097	5088	4787	5499	7408	2626	3229	2620	624	680
805	1915	997	2794	3120	4072	1851	2120	325	5642	1491	1660	1210	2667	2627	3772	2977	1598	2345	1444	6029	1836	1579	1172	3479	651	3668	1195	2677	711	1274	2242	2859	2763	5073	1980	2941	2357	2379	3589	1410	2130	4786	4991	3591	2621	829	1596	1411	1007
806	2006	625	2253	3208	1337	1696	2663	2202	1089	2713	1202	1240	573	1673	1540	1829	2289	1396	2370	2643	388	1898	1945	445	1601	2391	3683	1392	2155	1830	1777	1712	3393	892	742	753	285	430	765	1171	1298	901	514	1628	1041	1485	2269	2131	1409
807	315	193	434	221	178	247	378	301	197	137	124	142	185	258	131	171	88	128	184	301	22	235	161	243	105	255	295	357	181	106	195	182	376	57	-158	-306	-48	115	160	102	361	151	198	196	134	123	254	86	300
808	777	456	1074	666	450	526	693	565	743	489	516	323	470	523	312	512	751	453	425	1011	289	483	471	514	411	524	719	552	576	344	472	478	1168	206	341	80	138	174	167	369	459	366	380	324	77	417	282	471	581
809	244	199	567	218	-32	128	134	119	241	207	-96	179	237	77	-73	173	391	-133	151	564	166	367	87	-158	316	262	204	48	-29	188	178	-153	242	48	201	-26	-78	150	150	407	235	38	308	66	144	92	228	-279	-67
810	-45	-36	-103	-15	-61	-88	-117	-8	15	-24	-27	-77	-49	-59	-4	29	-89	-219	30	-65	-33	-35	-32	-83	-86	-193	-125	-14	-223	-19	52	-54	-5	-76	-62	-37	-55	36	-21	5	-157	-23	-76	-9	-132	-66	-15	-278	-9
811	-246	-43	-169	-121	-58	-161	23	92	-249	-38	-74	-81	-60	-108	-78	-153	-41	-27	184	317	-16	193	-3	-108	311	35	100	-82	-76	138	203	197	-34	-92	36	-38	-43	-34	-21	-22	43	157	284	137	52	25	88	72	165
812	19655	20187	23344	18830	21111	19538	19851	15207	21542	16943	21123	19576	20687	20374	17932	18313	17420	18599	18796	22564	29755	21576	16783	20826	18764	18404	18001	14445	19456	21200	21516	21530	17016	18758	16861	17818	16816	14469	17471	20009	20159	18931	19799	15761	12013	17844	14816	22255	22944
813	1121	944	849	1253	775	753	816	307	1098	651	662	465	386	654	684	415	744	80	539	1083	77	409	444	180	894	391	586	707	426	489	407	539	954	338	245	511	408	488	632	653	570	559	825	550	511	339	516	645	762
814	276	117	293	284	236	76	80	11	61	158	122	205	149	201	173	117	271	198	188	236	137	138	72	158	186	203	122	82	304	233	105	275	260	75	314	56	150	1	102	108	143	137	257	181	29	399	63	163	211
815	4788	2698	1809	2305	2739	844	1885	2097	3039	1948	920	1948	9740	2839	2579	4083	1726	1055	5441	11395	5299	3864	1746	2778	1854	3681	930	2189	1828	4721	3400	10164	2910	1812	1814	1909	2252	3136	2533	3768	4784	4141	5347	2926	906	2433	3566	1023	435
816	883	1081	2011	771	764	1184	793	490	2011	1065	882	719	1256	1018	877	611	844	507	398	1322	1150	238	701	1178	571	757	264	417	963	659	811	2218	716	751	485	1223	532	808	679	415	413	845	847	247	494	854	1276	460	560
817	3144	1205	1601	1027	871	768	1213	1835	1040	911	771	1106	1606	1300	1053	987	964	2874	2433	2078	620	1789	1071	1411	1138	1252	2212	1796	1247	987	1069	1727	2555	571	1091	2558	572	1127	437	2299	1643	1066	1575	937	1138	2083	1980	1927	1575
818	400	528	414	379	324	216	438	298	388	285	462	329	348	298	203	189	203	421	176	449	231	289	260	502	254	249	258	340	313	330	289	576	306	173	173	170	105	336	317	242	387	362	618	645	257	388	172	474	399
819	468	344	660	280	178	487	672	235	502	478	350	274	216	334	207	358	270	264	174	245	317	302	526	351	281	276	420	362	601	207	428	365	981	278	262	289	129	238	236	199	250	97	192	265	371	612	244	602	324
820	258	269	643	294	170	270	315	97	433	149	202	245	205	410	194	137	80	188	53	-64	112	-6	241	295	92	88	48	91	125	70	134	364	103	67	12	-16	-44	21	71	64	90	71	217	107	202	64	43	135	55
821	1139	1419	1111	1013	1076	1077	967	746	1048	559	654	721	647	1390	971	578	2140	510	419	826	289	608	645	1540	616	486	616	888	815	741	611	1062	1004	530	386	696	1090	847	490	819	710	999	1380	425	569	726	305	543	848
822	-593	-391	-522	-679	-288	-494	-841	-586	-577	-555	-366	-570	-346	-595	-282	-541	-1120	-337	-251	-368	-499	-350	-474	243	-617	-400	-1308	-388	-805	49	-500	-456	-1282	-460	-632	-496	-434	-257	-366	-361	-298	-507	-159	-250	-396	-332	-338	-462	-779
823	-1534	-2115	-1967	-1788	-540	-1196	-1851	-3093	-1417	-1689	-678	-1028	-800	-1679	-840	-1443	-3036	-768	-1927	-1305	-1165	-1127	-1343	-737	-1931	-1771	-4108	-509	-2133	-2730	-1174	-2087	-1793	-732	-2677	-778	-1331	-656	-1107	-797	-846	-2447	-874	-1272	-2042	-888	-1001	-728	-2132
824	456	683	531	451	419	227	258	977	469	293	439	617	375	426	353	262	366	277	300	1322	569	1809	7	591	506	624	189	468	1049	467	216	400	447	508	377	501	249	295	284	640	2943	894	364	599	299	270	155	562	430
825	-165	-224	-207	-134	-138	-145	-388	-82	-384	-227	-129	-229	-173	-208	-131	-107	-284	-29	-260	-36	-127	-153	-186	-132	-108	-122	-248	-72	-528	-329	-134	-54	-286	-164	-350	-257	-157	-102	-242	-158	-97	-323	-170	-128	-89	-103	-137	-181	-146
826	-780	-997	-1669	-869	-446	-926	-777	-1868	-1508	-541	-395	-659	-789	-1006	-136	-248	-884	-496	-479	-1610	-431	-1067	-644	-428	-620	-531	-1522	-1322	-917	-810	-792	-1133	-1252	-608	-1353	-750	-773	-480	-900	-317	-651	-901	-605	-407	-641	-945	-528	-1163	-945
827	-356	-451	-336	-565	-188	-421	-687	-866	-46	-317	-169	-431	-347	-589	-366	-393	-595	-295	-333	-299	-258	-343	-503	58	-393	-122	-776	-451	10	-580	-144	-273	-740	-366	-271	-295	-312	-184	-496	-365	-346	-447	-248	-295	-356	-468	-259	26	88
828	-1051	-1251	-1264	-1689	-648	-956	-1233	-1502	-1181	-753	-806	-702	-759	-754	-747	-888	-2123	-673	-302	-1597	-764	-392	-887	-618	-932	-945	-2342	-808	-434	-629	-905	-697	-1772	-820	-519	-1117	-907	-892	-747	-374	-191	-1294	-458	-780	-751	-932	-541	-1137	-978
829	-384	-351	-463	-468	-221	-360	-361	-710	-368	-265	-329	-326	-186	-306	-284	-283	-222	-242	-288	-283	-203	-353	-404	-354	-303	-258	-486	-212	-405	-301	-174	-348	-564	-252	-415	-272	-321	-239	-255	-248	-281	-286	-234	-147	-177	-365	-139	-440	-428
830	211	-46	406	310	129	232	389	665	348	231	40	176	88	189	95	89	164	204	154	246	266	264	330	33	308	117	-1303	91	-237	128	212	117	366	172	247	342	445	166	273	117	105	-7	126	99	202	280	238	167	312
831	-242	-365	-141	-396	-257	-352	-248	-466	-441	13	-288	-491	-60	-416	-290	-298	103	-142	-230	-286	-258	-73	-189	-286	-223	-172	-301	-371	-447	-207	-264	-249	-145	-241	-540	-23	-201	14	-462	-196	-146	-172	-348	-264	-194	-213	-393	81	-168
832	564	278	459	362	157	-90	225	406	494	310	185	205	183	159	139	255	650	298	195	187	188	426	406	192	304	275	685	407	474	210	222	168	651	298	228	272	405	197	125	147	154	237	171	175	371	319	226	519	608
833	334	662	504	119	1006	376	173	97	975	699	433	296	475	474	1014	546	621	193	492	1438	670	257	450	724	692	601	64	12	257	457	374	894	451	513	278	836	251	514	431	113	242	754	494	158	531	203	366	28	305
834	3447	4511	5403	3116	5082	4694	3600	1566	7315	7941	4239	3092	5214	2997	4478	1564	4414	9245	1688	6323	989	1290	2350	2800	2232	2578	3044	2807	2036	2496	3028	4738	2701	3858	2458	6282	2716	3452	2322	1518	2035	5168	5913	2809	5070	2907	4163	4023	3032
835	1614	880	2100	1300	799	1065	1214	1127	1486	1118	900	747	821	923	591	1074	1782	929	877	1225	762	969	1136	1025	955	936	1714	1223	982	656	886	810	2255	752	468	698	698	518	672	873	1070	845	740	700	861	1169	523	1471	1255
836	675	397	671	584	341	563	584	311	620	629	506	298	239	396	213	410	395	313	288	334	76	540	480	296	338	268	859	659	272	395	214	159	559	134	377	268	221	-46	259	148	301	166	174	198	419	229	208	705	521
837	-103	-9	-52	-121	-70	-163	0	-89	-151	-64	36	-8	-21	-130	-46	-165	-167	-10	-54	-150	-82	-120	-132	-130	29	-78	-118	-94	-137	-6	-174	-142	-296	31	-103	-166	-106	-43	-47	-51	-33	-17	-63	-21	-79	-87	-22	-189	38
838	-101	-275	366	74	26	106	383	71	373	-32	126	132	-247	51	-19	-269	-456	-142	-22	-440	-301	300	-117	-181	119	-256	132	789	-103	-211	-279	-166	-554	-176	-69	-189	55	-213	150	24	-269	-57	88	-106	-302	-146	-139	-237	250
839	1267	602	1650	1010	536	266	678	709	1048	1000	814	376	636	867	431	773	994	751	671	1022	371	867	368	437	402	617	1093	994	650	511	390	994	1552	267	576	372	491	414	397	747	791	395	751	600	696	1019	579	722	759
840	1068	898	1416	858	662	753	1053	964	963	545	724	550	903	739	618	955	972	761	634	929	226	805	636	883	842	846	1362	1245	245	580	756	989	1464	477	519	554	572	453	464	821	910	889	844	711	636	1045	732	801	663
841	-403	-504	-945	-364	-218	-403	-198	-166	-484	-281	-450	-257	-251	-171	-290	9	-543	-153	-244	-526	-268	-422	-416	-375	-181	-280	-230	-374	-414	-196	-178	-364	-347	-281	-108	-74	-332	-150	-105	-312	-339	-456	-398	-204	-259	-239	-149	-213	-480
842	154	452	464	232	421	645	99	460	747	408	466	343	241	567	350	152	357	162	200	635	432	223	526	486	162	131	26	284	358	154	395	309	103	156	367	398	68	270	157	318	77	179	187	292	272	254	307	227	214
843	-110	39	-98	-6	-21	-39	-55	-139	-60	-43	-17	-30	-24	63	51	43	-45	0	101	61	111	-96	-49	-58	54	6	-240	-142	-142	-78	-75	18	-131	40	52	5	-7	-24	66	-1	-74	27	-37	-39	34	-59	-91	-86	4
844	-168	68	5	61	-13	-128	-129	139	-28	42	24	-20	-102	-78	28	13	22	-106	72	158	-74	-34	119	-66	70	-59	-23	159	17	142	88	208	-168	-28	-31	20	31	24	10	-4	-107	-19	-64	92	2	-38	35	-14	-120
845	225	223	500	78	147	135	218	46	190	152	173	10	136	258	72	184	117	258	184	154	238	391	172	212	96	142	356	733	414	134	37	167	548	46	38	85	-14	93	35	266	293	202	352	237	274	95	61	227	302
846	-56	-9	22	19	0	-83	-6	140	-88	31	55	-27	-23	16	-40	-12	-96	23	-2	-6	-29	-15	89	-25	37	57	-1	21	79	23	14	-7	119	9	12	-74	-115	2	52	-4	17	-32	-19	9	32	7	101	-96	-57
847	498	478	387	362	746	517	367	403	464	689	1229	1780	334	304	334	413	474	282	230	819	442	683	645	830	579	252	317	721	531	568	323	481	601	320	639	471	216	307	493	880	839	652	525	1077	234	169	264	524	262
848	345	442	355	282	332	268	341	358	485	282	229	162	164	356	163	224	628	378	320	647	396	342	222	443	277	364	605	540	423	384	54	229	762	233	350	351	347	244	317	373	270	331	328	203	329	489	317	106	259
849	-641	-394	-1084	-972	-18	-915	-962	-1109	-545	-509	-294	-629	224	-352	-417	-212	-849	-301	25	-323	-578	-472	-782	-437	-274	-20	-921	-318	-689	-428	-81	-213	-947	-416	-627	-575	-490	-300	-611	-213	-55	-455	3	-327	-217	-231	-210	-224	-593
850	-27	-93	-166	-95	5	21	193	-64	44	-60	-85	-68	-61	-29	-35	-194	-133	-152	-345	-201	102	-53	-96	-185	-19	-63	-131	-323	-4	-153	-161	-107	-386	26	12	7	46	66	27	-147	-13	-184	-77	-162	34	-41	-226	-1	-115
851	436	679	632	710	377	410	635	535	924	462	446	166	287	392	324	334	744	124	255	309	431	653	425	475	446	268	593	395	1143	467	430	285	571	172	67	84	-81	306	156	335	361	238	227	218	142	236	111	687	807
852	-127	-99	-222	-51	22	-44	-72	-77	-95	-32	-36	-2	-137	-77	3	-13	-15	-99	-86	-54	41	-71	24	-87	1	-43	-64	-94	-58	41	44	-76	0	-10	-28	-461	-606	-21	-46	-48	-89	-20	-100	-27	-69	-30	43	-134	-19
853	65	104	127	154	61	46	119	251	82	65	43	48	62	72	51	54	208	80	83	66	86	100	153	91	38	132	225	154	109	59	203	110	123	95	76	105	285	4	58	75	110	96	60	36	129	66	-20	129	72
854	2509	1769	3472	2740	1354	2144	3053	3689	3202	2154	1726	1813	1357	1654	1459	1370	1812	1493	1520	1972	853	2543	2241	1023	1370	1514	3166	3065	1668	1768	1613	1604	3983	1637	1846	1948	2024	1114	1698	1905	1503	1606	1547	1432	1645	2626	1497	2436	2594
855	170	188	54	167	113	99	104	-239	146	108	79	61	119	179	110	84	124	10	117	113	94	132	216	132	140	136	206	72	71	59	119	100	219	142	173	40	137	101	120	260	67	246	123	73	167	198	-63	192	93
856	-7	65	-30	-296	242	126	505	10	176	108	-461	-208	-178	68	-140	-78	70	-192	-32	-162	-204	-44	165	-380	-398	207	197	-446	184	63	37	-188	608	75	-307	-507	-1249	-30	1	-148	-382	-231	-91	-200	-132	-195	-274	291	189
857	39	-91	290	128	83	144	124	631	288	2	6	133	-180	-18	93	174	-41	95	45	-34	-32	-92	32	61	106	5	799	-98	163	-225	117	-34	54	65	31	13	13	293	133	-6	-50	-196	-36	-36	194	208	50	223	300
858	-256	-329	-305	-540	-131	-163	-443	-206	-308	-36	-32	-323	55	-268	-647	-262	-36	124	-116	3	54	-172	-298	218	-328	25	-336	-89	-332	-334	-407	-23	-236	-158	-228	84	-119	-140	-150	107	-138	-51	117	-109	134	-74	-256	-90	-331
859	251	345	477	349	270	46	289	293	266	338	240	140	319	220	263	387	73	244	178	412	181	265	360	196	227	310	395	391	204	92	287	301	604	164	-105	164	98	194	148	279	377	45	294	-80	324	146	200	525	43
860	-987	-535	-1122	-1023	-318	-844	-1364	-859	-848	-873	-363	-386	-202	-590	-565	-745	-1857	-491	-622	-233	-97	-396	-328	-820	-338	-237	-873	-716	-437	-927	-178	-576	-1162	-349	-971	-521	-770	-438	-615	-138	-209	-374	-526	-280	-566	-636	-569	-669	-1146
861	98	91	213	20	75	21	126	121	123	44	84	-10	68	14	46	140	294	121	86	-16	-22	39	-81	7	12	147	37	38	-42	62	29	140	250	3	79	136	370	30	7	62	3	36	75	5	79	149	86	105	26
862	608	469	1097	721	453	487	756	772	716	758	551	308	572	550	443	564	861	640	508	732	333	634	535	626	518	331	869	953	837	612	424	611	1142	277	391	653	444	285	331	505	705	562	565	303	479	643	503	802	608
863	-128	-187	-91	-121	71	-170	-144	-58	-178	-102	-56	-103	-46	-64	0	-121	-99	8	-92	-37	-37	-78	-144	-102	-31	-23	-71	-135	-190	84	42	74	-122	-90	-16	-306	-184	-30	-92	-127	70	-6	101	27	-84	38	-137	-125	19
864	-162	-224	-200	-108	-60	-119	-48	-166	-267	-132	-145	-247	-151	-202	-143	-208	-94	-57	-213	-450	-137	-231	-231	-126	-186	-181	-239	-241	-203	-288	-50	-403	-366	-93	-213	-272	-738	-112	-95	-139	-213	-239	-157	-247	-139	-69	-43	-232	-79
865	-275	-169	-302	-235	-103	-216	-152	-164	-259	-164	-180	-148	-129	-69	-84	-138	-83	-137	-107	-52	-66	-92	-174	-216	-197	-67	-217	-487	-144	-142	-182	-192	-410	-150	-310	-53	-121	-90	-102	-139	-82	-141	-79	-6	-7	-59	-50	-296	-226
866	-82	-62	-205	-118	-79	-46	-134	-100	-215	-147	-91	-112	-94	-138	-59	-59	-143	-28	-28	-58	-102	-73	-32	-179	-70	-77	28	-149	-80	-123	-65	-170	-102	-39	-129	1	6	-115	-43	5	-126	-36	-73	-87	2	-190	-76	-74	-192
867	-349	-338	-547	-176	-236	-435	-341	-509	-247	-450	-156	-139	-56	-323	-161	-375	-500	-261	-239	-43	-172	-275	-233	-227	-178	-345	-874	-617	-570	-335	-136	-348	-623	-205	-247	-240	-685	-177	-66	-215	-223	-215	-217	-212	-144	-391	-94	-578	-812
868	124	256	336	186	242	366	312	412	333	121	53	51	134	347	299	183	54	129	38	365	189	81	-11	162	186	167	97	123	367	241	10	285	185	137	149	163	7	164	26	138	97	151	174	118	92	229	17	201	406
869	48	-65	15	86	55	-106	84	-13	31	70	39	-15	16	-79	47	87	-76	57	22	-54	57	122	-74	45	94	94	-136	98	-244	-63	132	-13	-25	-23	52	-20	-49	10	47	59	30	-149	34	9	107	15	38	-36	-64
870	1233	826	1307	960	386	938	873	941	1193	413	942	359	961	1080	341	469	715	698	662	1148	378	878	689	702	905	375	1140	975	374	832	443	936	1381	286	377	363	160	391	459	646	675	598	597	361	923	576	244	777	1031
871	-23	-36	-261	-240	-68	-115	-149	-157	-142	-125	-152	-130	-37	-131	-11	-125	-190	-24	-37	-29	-68	-121	-34	-169	-108	4	23	-43	-143	-106	-79	-92	-123	-206	-175	-126	-280	-86	-99	-88	-67	8	-117	-192	-99	-77	-244	-89	-108
872	-963	189	-720	-1019	-374	-364	-1090	-334	-778	677	-197	80	-259	-475	-130	-666	-916	-407	-442	-139	713	226	-77	-727	596	-71	-1076	178	-1406	335	-222	-319	-1629	-804	-600	-684	180	330	422	337	-331	-226	61	-160	-514	-1163	-180	150	-1091
873	-208	-155	-286	-153	-88	-177	-203	-38	-183	-129	-158	-146	-186	-174	-98	-108	-226	-152	-152	-254	-109	-194	-98	-122	-76	-46	-162	-154	-161	-37	-130	-237	-185	-43	-158	-965	-1208	-102	-157	-162	-107	-67	-148	-111	-134	-18	-30	-181	-156
874	1215	2424	1253	1219	1390	947	697	655	4641	795	1350	1691	887	2764	969	787	1284	783	557	1002	518	447	522	972	769	1370	729	383	2521	1237	1288	1153	1948	502	1273	382	653	447	728	1430	1054	1736	2011	2403	1108	1171	922	1822	1555
875	316	-14	15	315	60	280	228	106	314	175	172	110	0	43	22	143	-10	0	75	39	121	69	269	-15	117	-14	563	164	241	20	214	108	438	117	76	169	137	125	100	57	81	96	6	79	179	406	221	426	329
876	293	205	245	476	150	183	846	188	141	175	168	93	187	181	159	188	574	186	129	70	131	122	134	1339	177	211	337	123	278	226	134	99	544	380	153	219	218	93	103	133	173	599	131	85	227	267	162	236	302
877	366	296	84	606	423	167	608	328	121	119	21	87	241	302	256	108	942	80	80	444	-138	111	49	296	155	124	327	-210	469	53	121	537	873	172	72	428	386	212	140	-60	-111	160	223	-19	237	247	297	257	91
878	1311	1696	1624	2585	3211	874	1308	727	3006	3219	2168	590	2607	1674	2249	2164	2083	688	1878	3497	2516	275	1405	2366	2009	1663	988	697	1390	1160	2527	4854	1985	2601	2112	1681	3505	1344	1649	1368	1094	2526	3140	489	1869	836	604	702	521
879	18100	23566	22382	23118	22720	18614	18842	22525	21840	20047	22786	22750	23136	22147	21947	21319	21486	20777	22334	19530	31569	24404	23216	23707	24663	20534	24656	20564	21816	24207	24405	22757	23426	23404	19758	22067	26575	16165	24154	24616	22692	22656	21976	22617	15757	19654	10597	23949	21088
880	371	731	577	528	505	521	589	539	1320	844	308	255	713	585	789	437	903	627	299	543	1113	307	573	526	166	554	485	724	259	467	271	1065	320	632	668	686	335	664	205	301	517	600	810	-1	526	481	874	580	266
881	37	36	23	68	74	5	62	185	91	26	-11	83	55	60	79	26	96	91	44	66	-29	136	134	30	118	88	87	383	79	237	-31	44	106	25	84	111	163	99	196	186	293	75	139	-13	-7	133	55	73	-14
882	18	729	-18	-151	323	220	-383	-757	580	223	388	67	77	288	262	191	562	277	99	818	342	213	476	51	706	332	510	-350	166	241	142	249	585	-34	182	-50	-81	150	140	236	238	26	157	151	97	267	134	407	252
883	1833	2334	2048	2246	1302	1207	2592	1388	1636	1171	838	1618	1990	807	876	1425	4133	1959	1701	1795	-53	1578	1584	1602	1689	1405	1403	1764	522	2006	1924	1265	3045	1759	1509	1237	1107	1670	988	2288	899	1979	2409	956	2686	2088	2348	2000	1305
884	-387	-298	-280	-362	-282	-289	-319	-119	-222	-137	-200	-198	-152	-163	-158	-280	-281	-96	-226	-156	-208	-372	-237	-291	-150	-232	-417	-267	-320	-117	-281	-288	-245	-176	-274	-91	-402	-38	-103	-133	-350	-183	-144	-159	-159	-190	-149	-317	-271
885	81	378	148	110	267	65	226	229	174	99	183	117	177	146	195	142	201	14	125	904	72	37	138	200	238	60	-7	255	134	197	-2	225	253	172	175	253	336	723	295	89	123	307	424	104	62	141	193	161	74
886	-1289	-438	-1795	-2177	-683	-1285	-1952	-1652	-938	-980	-658	-1244	-816	-404	-837	-965	-1786	-572	-965	-246	-709	-1133	-1210	-887	-1156	-614	-2685	-934	-1447	-634	-607	-1288	-2047	-896	-1557	-754	-894	-643	-1036	69	-479	-1616	-678	-794	-1135	-821	-874	-1348	-1243
887	7559	12458	9550	8056	12110	5729	5452	4497	14635	7447	6251	8181	5237	9273	10051	8534	5963	10393	6126	22543	12697	9304	6873	8861	10993	7501	8450	7022	5853	7380	6039	10728	7303	7233	5850	7448	9140	5791	6868	8592	8385	11166	11274	8317	5060	5155	5363	8285	6667
888	-21	27	-39	40	67	-7	-16	-20	-127	18	-19	-43	14	31	89	13	-47	-19	-7	12	54	-142	-45	-32	7	9	-15	-125	-61	-27	151	21	27	84	-33	-185	-200	14	0	-8	-17	79	57	-38	-72	-82	48	-78	-57
889	-201	-114	-367	-238	-161	-156	-304	-190	-276	-309	-160	-179	-187	-156	-160	-263	-239	-171	-246	-261	-154	-311	-224	-102	-212	-220	-208	-251	-267	-105	-79	-328	-293	-266	-84	-982	-1464	-111	-112	-165	-226	-7	-94	-128	-242	-275	-142	-338	-238
890	95	98	210	182	32	231	230	227	179	84	81	-31	143	-88	44	102	2	-34	63	164	136	196	70	-133	123	-50	-50	-55	-108	131	44	-114	148	123	-38	53	-190	75	40	34	-42	84	-74	92	2	51	78	-180	-14
891	65	78	28	-138	94	-14	-10	-2	30	7	12	57	29	58	59	48	-9	71	79	17	1	-54	26	-31	6	15	-23	53	-21	11	-2	57	35	4	-14	-29	-32	59	23	11	-94	20	101	16	-29	51	7	44	-2
892	-68	-107	-119	-177	-51	-87	-122	-80	-45	-96	-72	-119	-38	-9	-63	-26	-51	32	-54	0	-54	-65	-41	-4	-75	-45	-120	-16	-79	-67	-18	-54	-175	-23	36	-60	64	-33	-13	-67	-51	-40	25	-29	-42	-149	22	-123	-151
893	420	124	247	319	114	250	482	268	340	193	189	232	87	232	131	248	83	264	126	107	34	342	241	170	66	78	132	357	305	-17	128	253	655	115	-76	108	239	-14	167	105	181	-24	68	171	227	409	226	285	295
894	741	497	1005	846	571	901	732	958	672	746	833	880	691	851	451	735	495	558	1013	835	499	827	778	464	293	476	1015	490	922	485	645	953	1054	496	28	536	772	271	638	478	450	383	860	599	581	829	643	1286	976
895	347	351	343	650	205	391	547	223	305	392	11	267	209	208	83	364	70	116	263	107	188	238	378	354	236	237	966	301	-213	62	136	402	648	262	269	77	211	0	99	364	71	362	137	68	312	360	185	111	187
896	20707	20221	23830	20870	20273	25237	25070	17433	19280	22809	22984	22897	21275	21518	18258	21385	15782	20254	21606	15734	26210	26688	27307	24278	20606	20810	22897	30146	26201	23136	24378	18971	23792	22283	20710	20608	17598	18500	25698	22931	20347	13950	18594	22534	20798	23429	22800	21305	21463
897	254	263	213	355	313	176	139	473	223	164	101	451	177	49	-11	422	80	391	138	132	520	277	640	706	329	651	477	499	-109	225	325	123	1095	173	-24	259	132	316	142	318	227	30	425	109	342	605	22	220	-24
898	320	12	325	37	-32	85	228	194	247	175	89	-24	-30	228	-98	293	-5	105	239	-127	108	108	246	110	173	39	230	241	241	16	23	97	279	18	-52	123	4	108	-21	209	87	-19	138	-54	114	314	22	607	79
899	57	50	123	133	30	-28	152	169	26	83	48	-12	52	58	25	80	80	65	48	-39	33	51	115	129	52	87	54	53	127	-41	77	64	99	28	-14	1	-143	40	23	66	89	-30	26	62	7	175	205	131	125
900	263	210	318	184	234	120	173	232	271	178	136	130	187	197	180	336	514	180	150	260	176	151	176	239	135	219	353	318	377	128	262	155	269	28	144	62	168	62	108	134	185	211	251	94	182	260	134	329	139
901	484	388	481	785	233	440	435	605	609	333	278	408	336	364	175	487	666	209	247	474	448	273	587	369	283	225	788	357	424	297	256	335	586	292	262	345	286	226	307	290	413	308	239	235	164	247	350	497	418
902	118	-94	90	115	-174	181	144	-710	66	78	-42	2	-111	-54	-100	121	-44	-115	-392	-55	-402	-442	-250	-243	-234	-427	39	-178	156	-506	-14	-169	444	-106	-485	277	131	-284	-38	-42	-430	-206	-228	-292	-47	-159	-12	-319	-180
903	-182	-142	-18	394	-129	-350	-275	1004	704	500	-521	-462	514	731	91	835	462	230	333	864	490	-340	-389	759	180	791	-372	1327	278	221	1027	432	21	405	586	407	81	479	-394	521	729	74	239	470	758	682	-7	788	709
904	170	46	145	201	83	42	112	223	104	73	112	94	60	151	32	86	146	46	123	171	-216	184	66	177	106	79	158	219	180	60	113	89	240	1	2	-10	72	44	32	7	101	110	157	61	122	151	101	67	185
905	-440	-476	-606	-660	-370	-371	-529	-605	-591	-258	-482	-277	-427	-529	-446	-286	-677	-482	-295	-475	-254	-464	-317	-412	-381	-362	-749	-340	-415	-287	-250	-473	-670	-245	-271	-383	-278	-274	-355	-276	-451	-473	-432	-234	-329	-293	-195	-640	-454
906	12801	15610	12642	13815	18906	8129	16562	12448	16869	14319	15791	20751	20684	15479	15934	13564	16902	13182	13508	16786	19284	12958	12805	15007	16465	14983	19145	14862	16269	22868	12850	18447	13260	14833	12915	13477	17030	22367	15432	14323	17540	17506	18517	10103	17278	14239	13075	18896	18412
907	-90	-117	-172	-133	-160	-172	-115	-20	-167	-222	-178	-76	-184	-117	-97	-83	-305	-143	-136	-131	-83	-200	-89	-133	-107	-130	-34	-67	-168	-212	-229	-171	-273	-31	-103	-1054	-1596	-57	-106	-160	-149	-104	-175	-134	-107	-154	-45	-122	-298
908	-231	-90	-212	-111	39	-181	-223	-260	-87	-62	-71	-90	-35	-144	-62	-19	-196	-182	-98	-36	-67	-234	-100	-88	-50	-77	-226	-140	-263	-150	-98	-105	-111	-153	-177	-192	-208	-28	-119	-64	-147	-51	-35	-42	-134	-66	-66	-127	-324
909	381	404	238	439	309	293	359	106	355	-44	47	181	360	351	24	49	312	210	141	530	-32	171	429	35	112	94	463	53	326	306	-25	234	511	133	425	22	540	119	46	26	189	334	320	125	34	306	-20	461	-50
910	-62	-91	-36	-107	-24	-103	-129	-19	-49	-176	-69	-96	-87	-128	-140	-96	-265	-62	-92	-122	-71	-138	-127	-77	-81	-8	51	-28	-84	-87	-107	-152	-28	-59	-88	-69	-120	-80	-3	-61	-91	-120	-14	24	-92	-74	-238	-160	-81
911	2307	1508	2488	2484	864	1331	2461	2081	1568	1333	847	732	1327	1249	646	2036	2293	1505	1242	2241	557	1794	1278	1499	766	1666	2883	2602	1373	1153	1145	2052	4148	778	600	1230	783	1247	799	1773	2059	479	865	1216	1545	2271	1886	2054	1825
912	19899	22408	23054	22312	22697	19133	19288	13009	20947	21263	22476	23700	20523	22500	20416	23722	16652	23999	25492	18327	30075	23281	22031	23648	20841	23139	22650	17086	18443	16397	26019	19944	22178	23304	20885	20889	20176	21478	21778	23267	21901	19708	20478	22837	24712	21666	27061	23187	25320
913	-84	49	-50	68	21	8	-104	77	-37	45	-2	12	-157	-47	-37	109	-122	-39	18	63	-143	13	3	-233	-23	-71	84	-67	21	-64	-12	50	42	9	52	-75	-6	56	49	29	-43	121	-11	17	-79	0	-25	32	-271
914	-785	-759	-1531	-923	-650	-857	-954	-845	-822	-870	-624	-684	-757	-676	-782	-768	-650	-689	-673	-876	-427	-859	-754	-500	-835	-634	-1292	-910	-717	-677	-653	-988	-2000	-613	-956	-466	-426	-573	-629	-778	-707	-841	-767	-633	-828	-860	-650	-862	-687
915	110	79	27	74	46	-8	11	44	52	42	63	-37	31	28	22	113	40	79	31	93	-84	18	47	41	36	90	76	53	184	183	92	30	142	98	19	48	-93	116	7	128	121	95	110	54	67	72	53	157	-4
916	135	110	157	251	49	277	203	-61	239	101	178	50	79	136	-5	401	97	-23	46	-38	-81	154	100	172	98	1	112	-33	98	-96	142	21	-42	-20	283	54	296	109	244	112	129	129	262	79	174	272	251	22	76
917	141	136	265	-37	192	-48	95	-175	428	157	-36	60	283	59	27	18	259	103	250	229	53	32	9	180	-26	-149	21	154	95	48	397	207	113	173	-86	241	42	128	95	87	261	88	228	130	14	2	320	-51	0
918	-23	32	138	11	68	48	-6	143	148	68	124	8	124	36	-33	81	131	32	27	113	66	58	26	142	60	60	367	195	131	30	100	127	415	43	-12	42	97	41	66	83	115	151	73	70	-37	157	7	14	28
919	393	413	493	414	291	392	712	473	317	577	279	303	350	594	278	360	327	305	330	357	238	337	378	465	264	482	962	680	734	304	346	552	880	148	177	136	133	170	266	345	306	131	381	291	396	512	307	601	678
920	-725	-451	-955	-937	-406	-124	-1332	-778	-1290	-556	-819	-316	-395	-537	-323	-433	-602	-491	-461	-363	-347	-529	-588	-664	-477	-491	-981	-777	-797	-407	-285	-532	-1012	-317	-540	-363	-391	-405	-652	-255	-515	-346	-589	-384	-534	-816	-475	-829	-454
921	2434	1846	2715	2161	1065	1557	2144	1856	1985	1712	1897	1438	1797	1770	1073	1821	2655	2061	1197	3375	2342	2057	1548	1927	2255	2355	3609	1962	1822	953	1733	1853	5360	986	1317	570	925	1000	983	1268	1767	705	1131	1083	1510	2623	1255	1976	630
922	223	1074	148	-53	353	421	102	28	272	367	88	426	220	213	130	30	323	-38	102	1070	199	-171	117	-132	395	290	-39	38	36	225	285	107	121	36	189	283	352	72	153	371	355	89	326	1801	159	61	-30	80	149
923	-123	-168	108	8	52	-60	-188	-139	-185	-159	-160	-81	-78	-114	-49	-186	-228	-46	181	355	33	-19	-205	-109	172	-83	-248	289	-122	78	111	210	141	10	-156	-169	-102	-109	-137	-134	129	-90	61	140	-104	193	-205	-179	-67
924	-14	-11	253	13	20	-51	110	4	10	-8	52	99	4	24	9	24	-45	35	-31	5	31	-60	-49	-118	-36	65	61	-111	79	-77	18	-26	27	10	-36	56	19	90	23	24	-23	53	-19	40	2	0	91	-49	-108
925	21	68	17	59	63	-48	28	118	139	12	-83	40	2	89	46	-24	313	29	-23	48	-31	-37	39	59	-12	77	244	91	36	13	54	24	198	37	86	-2	77	14	-4	67	131	162	66	21	99	-48	61	-65	0
926	4281	7832	5474	4225	5452	2950	2659	2635	8516	4536	5841	3509	5468	5232	4294	3221	10913	2338	3202	7814	2086	3771	1886	3467	3644	4558	2345	3901	3017	7076	4513	6532	3853	3140	2543	3762	3024	2775	2623	4416	6353	7321	7094	9817	1982	2150	2071	5637	3354
927	76	-28	200	170	41	165	168	244	133	-33	82	93	-17	87	-71	66	124	97	46	-295	44	57	-32	39	25	-21	219	41	112	-164	-71	-69	155	101	245	17	-119	166	154	-12	-11	-82	-18	31	89	278	104	59	192
928	830	1302	2098	1039	1607	832	488	1439	2343	1056	1175	479	827	1278	1109	970	2394	482	686	2535	228	625	545	945	895	350	597	576	655	511	1681	921	462	381	1136	843	606	410	676	746	1167	1490	2206	1947	339	700	188	847	343
929	44	207	61	154	252	334	-73	-446	988	239	147	127	-20	-138	338	142	731	30	101	537	633	85	68	293	208	68	-248	644	325	185	487	114	116	134	302	486	121	157	216	269	135	-16	220	328	117	23	-50	-72	122
930	24223	21103	22425	21932	23271	18656	16142	17742	22447	24062	23786	26879	27162	21210	20978	22743	21766	21607	22198	22274	6578	25044	20805	21634	21851	24751	23303	23575	19238	29047	23523	24225	18166	24625	22065	18734	26205	29875	19970	23861	23947	24906	23847	24616	21499	18431	23352	21513	19688
931	2639	1081	3472	3414	1403	1708	2764	1836	2318	1410	1093	1320	1886	967	1473	1824	2925	1694	1369	2185	1705	1902	1472	2521	1544	2055	2627	3225	2622	1213	1395	2131	3403	1023	963	882	1979	759	847	1743	2206	1333	1896	1849	1702	2072	760	2880	2702
932	-341	410	-20	-1107	-327	-1132	-1255	-647	265	-780	-721	-392	-457	-91	-350	-571	18	-27	-479	-681	324	-745	-252	-147	-165	-15	115	-482	-532	-413	-39	25	727	331	326	-406	-200	-257	-312	-332	-505	-126	-187	-204	-459	-211	-223	-419	-490
933	479	654	496	1138	249	787	620	629	499	649	333	561	459	820	846	567	928	399	347	640	592	655	995	354	506	400	805	704	732	494	237	605	1025	447	237	137	32	421	272	482	510	528	280	396	409	267	475	362	331
934	622	606	747	580	267	609	867	857	636	350	383	294	360	505	306	358	876	383	509	716	278	493	607	396	429	395	943	449	603	886	313	486	1058	284	725	284	389	332	300	354	402	813	580	365	421	674	498	626	978
935	363	229	574	429	72	483	299	200	561	83	391	237	143	215	105	-42	164	131	147	229	152	545	144	-75	-7	44	264	412	213	-66	132	187	188	161	4	435	241	399	185	194	269	163	151	-23	97	151	376	-45	452
936	853	380	1750	661	569	839	514	787	607	118	467	494	173	828	206	379	300	364	563	775	84	737	279	501	726	585	973	712	611	734	336	552	1088	-150	286	34	69	92	-13	438	351	241	577	247	319	543	244	829	543
937	179	189	286	215	252	200	102	49	140	148	295	24	138	195	207	153	191	26	62	95	211	238	77	153	72	1	97	45	125	17	88	113	-5	67	57	94	68	88	55	80	43	183	153	318	27	59	137	190	62
938	-198	-77	-372	-102	-103	-211	-119	-149	-92	-60	-156	-30	-200	-298	-146	-112	-155	-186	-32	-13	-358	-74	-87	-243	-283	-200	-103	-287	-421	-212	-418	-195	-169	-3	-194	-386	-244	-4	-72	-127	-267	-82	-232	-218	-37	-43	-71	-325	-663
939	449	594	735	707	309	602	472	434	407	118	221	125	101	542	239	320	483	542	94	237	62	139	438	366	406	329	690	562	204	257	161	57	821	-10	225	108	126	235	52	162	-2	299	355	200	359	478	399	568	108
940	32	130	234	302	527	270	134	-44	160	182	-22	15	195	548	320	-5	267	77	214	466	-122	51	212	921	146	23	25	12	263	-125	-27	677	65	225	100	22	128	8	10	-19	-158	245	376	-13	-17	61	35	-156	-100
941	-40	-124	-164	-177	-102	-124	-349	-113	-49	-148	-35	-107	-125	-110	-68	-93	-45	-67	-73	-148	-168	-94	-165	-94	-55	-128	-317	-33	-231	-4	31	-95	-126	32	-91	-108	-128	-43	24	-60	-125	-119	-102	-137	-142	-172	-170	-150	-98
942	9070	10080	8602	10631	10013	7576	7952	3054	10075	7915	10758	8073	9504	10811	5935	10336	6060	10144	10014	12858	15248	9141	8705	11627	7298	9225	8950	5887	11624	7500	10248	11871	8889	8376	5615	6075	8232	10569	10666	8888	4916	3151	10165	8088	6253	6658	6326	11390	9551
943	-131	-97	-224	-183	-1	-115	-373	35	-112	-182	-170	-125	-185	-194	-100	-106	-126	-39	-82	-117	-17	-196	-125	-23	-135	-185	-150	60	-169	-24	-98	-199	-252	-4	88	-106	-35	-24	204	-146	-141	-37	-207	-73	-114	-133	61	-206	-93
944	83	184	-4	-29	0	-149	-317	-22	186	-114	227	40	10	10	-188	34	293	39	-58	281	186	-36	-186	-18	-81	66	173	-178	-379	175	65	362	-407	-103	31	-211	615	85	58	-250	-114	358	378	21	67	139	-38	-413	-351
945	25	109	11	-102	5	19	70	277	76	194	53	109	32	134	11	111	252	73	-4	110	-9	-65	53	58	131	96	-12	-31	114	-1	-111	55	108	-57	2	-170	83	33	-30	43	45	-55	26	8	24	149	40	59	57
946	146	-21	75	10	-59	28	-100	127	11	112	-57	-51	37	3	-35	299	-55	28	7	233	-29	-56	-41	-30	28	58	29	94	-55	123	-142	44	42	61	262	-20	25	-5	46	60	117	-41	-5	-8	-59	64	0	11	-45
947	165	123	133	-151	52	67	25	83	250	12	56	21	-33	-63	-70	44	95	-78	20	6	-148	-19	178	-7	18	42	203	26	67	-27	-115	-67	-94	37	201	-57	-131	-23	-60	-44	17	40	-46	19	-2	-15	61	-7	38
948	26	454	122	582	18	554	154	440	379	501	80	350	327	238	335	298	917	339	250	535	161	14	518	514	49	568	434	304	-46	294	395	739	236	309	355	478	549	219	324	538	467	499	214	470	237	229	355	46	163
949	276	226	735	260	401	197	42	281	241	233	310	211	178	251	364	439	415	435	310	397	684	243	229	531	406	357	322	774	279	280	428	353	510	111	257	23	76	108	114	156	209	25	363	361	49	149	71	185	478
950	-605	-987	-1015	-1033	-155	-858	-1107	-911	-886	-346	-570	-707	-531	-706	-464	-336	-476	-439	-395	-311	79	-554	-944	-449	-368	-438	-1502	77	-535	-702	-60	-746	-1334	-137	-43	-169	-244	-101	-194	-254	-301	-851	-144	-170	-529	-437	-434	-53	-553
951	-364	-235	-707	-325	98	-528	-305	-913	-372	-153	-168	-365	-70	-403	-131	-31	-271	-97	18	544	-298	-155	-379	-224	-246	-244	-868	-161	-654	-27	-243	-172	-267	-51	-497	-247	-17	4	-123	-61	-194	25	-75	-85	-82	28	-63	13	-76
952	-283	-659	-945	-931	-304	-554	-1193	-806	-839	-361	-333	-559	-295	-331	-260	-307	-893	-314	-277	-408	-204	-719	-1025	-789	-339	-381	-1006	-284	-1089	-511	-416	-616	-1133	-237	-158	-449	-481	-147	-331	-305	-387	-436	-334	-414	-87	-342	-259	-894	-1041
953	424	188	501	217	150	268	331	314	358	221	126	229	158	256	143	190	161	229	143	259	199	275	104	162	167	124	289	183	221	56	275	253	287	48	199	207	585	125	97	251	219	90	94	88	119	224	7	257	79
954	167	95	78	213	64	-10	173	214	144	60	37	86	92	143	146	160	167	95	119	70	-6	49	75	95	49	146	181	48	102	24	-2	143	113	76	31	83	510	33	61	126	114	87	78	117	54	-54	111	83	113
955	-103	27	-372	-108	-147	-131	-184	14	-74	20	-95	-63	-113	-172	1	-109	-82	-138	6	-66	-82	-65	-189	-56	-117	-42	50	304	76	30	-52	21	-121	-97	-225	-90	-36	10	-160	-147	-37	-82	-73	-19	-49	-128	-104	-172	156
956	-748	-197	-327	59	83	-170	77	380	680	144	140	-201	354	-137	477	110	1010	599	408	411	732	104	-341	-214	-60	-173	1977	48	-421	414	758	348	1236	131	124	263	397	47	-306	-385	-98	623	184	-185	781	808	475	544	-4
957	181	37	-156	-71	76	-88	-45	-127	-89	101	-35	28	-104	76	0	-54	26	83	21	-127	-16	88	62	103	-25	-2	-23	127	13	-105	67	84	105	-10	12	56	112	18	-23	-85	-137	-72	-101	47	69	172	40	-11	100
958	153	24	95	413	148	154	25	341	20	-142	194	218	91	112	263	-212	98	108	59	-183	62	37	150	71	361	-185	-301	33	49	264	12	24	-806	-14	132	-59	238	232	112	92	69	406	104	49	119	64	63	-14	129
959	-601	-494	-606	-607	-444	-339	-663	-518	-584	-358	-359	-461	-393	-484	-500	-405	-463	-263	-382	-702	-323	-422	-583	-573	-394	-477	-583	-615	-550	-384	-365	-445	-820	-403	-367	-446	-444	-186	-442	-445	-535	-523	-463	-348	-334	-375	-444	-536	-557
960	967	372	755	1023	400	314	998	473	510	512	372	303	475	328	361	585	511	385	325	602	524	404	414	517	561	522	619	620	755	537	586	639	839	242	432	389	422	241	467	496	507	502	701	382	479	540	213	495	786
961	1574	778	305	1334	891	1109	1369	946	419	1140	880	924	811	1047	833	1179	780	935	705	463	802	1319	1255	987	993	943	1054	1117	964	359	1002	837	109	616	276	1034	875	828	728	902	295	720	815	705	741	1156	986	1338	1257
962	51	-160	-156	-151	-14	-202	15	-19	116	-79	-80	113	-68	61	50	92	-27	-1	-32	13	172	60	-70	-32	-58	12	-54	33	64	-134	-23	-110	-35	65	86	-38	-52	82	68	85	43	-9	-92	-81	-79	180	45	-93	-72
963	-777	-592	-1242	-1042	-339	-661	-1001	-821	-758	-722	-557	-622	-869	-497	-603	-583	-822	-435	73	-41	-673	-360	-568	-477	-301	-663	-1326	-823	-1434	-20	-275	-503	-1993	-513	-336	-287	-891	-233	-179	-283	-587	-625	-488	-658	-666	-522	-284	-647	-411
964	513	376	174	133	119	80	248	293	495	423	340	182	246	315	57	275	430	163	500	748	142	240	140	203	237	125	441	222	431	590	136	286	500	203	249	140	127	116	187	186	299	173	376	159	257	363	312	475	175
965	2246	1844	2967	1715	856	2165	2095	758	1135	1204	989	781	967	2186	1061	974	959	1694	475	2426	888	1323	1333	1215	685	1544	3195	1588	1664	1552	619	965	3951	978	1314	1111	447	1680	1019	1464	1062	241	1839	825	898	1897	1380	3251	1348
966	9	5	-75	-95	-8	-71	-159	-89	19	21	99	-79	13	4	34	-55	78	81	3	95	12	52	18	-19	59	91	-43	-398	-206	-22	44	-20	37	-7	-216	-5	-89	95	-92	12	41	-21	137	79	74	157	-208	-27	-187
967	-219	-202	-158	-220	37	-204	-132	182	-86	-86	-161	-31	-43	-123	-30	78	-7	41	32	-128	16	-98	-317	27	43	-30	-337	-159	-140	41	-128	-150	1	-114	-406	-90	-19	-89	-136	-102	-106	-63	-103	-155	-132	0	-10	-35	-33
968	17	4	-54	29	-28	40	-13	1	24	4	-13	-2	5	-2	-13	36	122	14	28	-61	42	22	-13	-58	-86	-20	-9	94	207	5	180	38	-12	39	177	-45	12	7	78	-34	-41	-19	-29	-55	-42	-5	15	4	12
969	351	378	312	369	170	435	403	452	395	283	195	241	366	298	383	647	535	384	409	471	287	534	391	423	309	377	270	207	276	226	311	357	769	350	322	418	427	122	388	322	147	202	364	327	312	605	391	349	346
970	395	402	106	1463	-143	277	189	175	399	-157	214	366	230	42	506	-180	519	178	145	388	712	-56	685	-267	841	213	347	-724	524	265	176	258	632	86	435	-440	902	233	-89	17	-126	536	187	493	459	476	88	-250	168
971	665	677	1447	549	605	577	475	275	2004	810	791	346	844	732	696	637	593	710	393	837	614	381	495	836	413	589	513	453	402	605	508	805	760	599	459	667	773	441	512	397	347	875	639	386	446	522	442	479	367
972	447	314	923	403	608	537	213	124	838	265	474	185	1174	591	1418	346	736	555	462	624	339	188	347	639	225	389	372	354	371	403	706	1242	678	1152	608	1059	325	272	12	141	327	569	322	193	439	257	223	147	144
973	242	134	153	473	354	192	198	245	256	107	98	116	174	165	319	181	525	150	133	196	32	173	102	264	156	151	223	238	223	179	224	187	230	123	228	201	283	108	60	139	71	251	232	76	149	275	137	235	226
974	679	650	975	866	469	736	821	907	942	580	523	505	536	595	441	555	1242	543	463	348	605	738	583	716	441	461	1162	731	1147	584	573	409	1320	314	648	638	606	326	389	463	546	559	540	288	616	594	368	949	848
975	117	15	94	161	7	44	87	148	97	-22	-26	12	157	260	282	-124	337	0	14	634	178	61	47	135	25	8	126	-149	266	-11	121	431	-34	181	139	198	85	164	26	-7	-6	113	13	-59	-69	172	30	-133	36
976	-263	-67	136	-209	-103	209	-110	-311	125	549	111	-125	-138	-51	-34	-62	-136	-85	-134	-255	-48	-139	210	-23	-135	-88	-179	-260	-142	-306	-176	-95	-196	-46	-281	-93	-150	-37	-125	4	-26	-238	-152	31	-54	-48	-129	-122	-122
977	-19	-36	-127	-208	-112	-35	-80	-55	-35	-97	8	-47	-91	-85	-8	-86	-100	-51	-109	-118	-81	2	-9	-68	-69	-21	4	65	-159	-143	-94	-76	-25	-29	-120	-106	-47	-47	4	-91	-87	-135	-99	-43	-67	43	-88	-110	-31
978	-136	93	-512	-565	-79	-261	-421	-503	116	-252	-13	-262	194	-297	-120	-191	194	330	-229	-178	-454	-69	-298	-160	126	-284	-272	-436	-538	-250	10	-61	-105	-173	-276	-87	-74	-118	-230	-265	-113	149	-176	-137	-152	-108	-142	-283	-336
979	152	77	182	106	213	142	117	97	148	71	33	110	176	121	126	147	159	116	91	268	112	109	98	170	135	111	115	108	87	113	147	193	267	164	110	106	168	54	47	55	131	138	217	54	114	103	78	158	84
980	-74	21	-128	-160	106	-88	-65	-175	77	-3	73	15	16	-27	68	-135	-6	-3	6	-43	129	-26	-138	-80	-14	-13	-181	-48	2	-94	-56	37	-196	15	36	13	-36	-62	-3	-24	-9	-44	-6	-8	-137	23	-38	49	-64
981	618	352	536	320	316	394	458	524	351	403	360	171	291	316	312	419	457	276	269	444	152	394	180	482	300	413	356	490	363	283	277	259	816	108	348	330	223	82	167	292	341	150	324	351	491	414	226	562	420
982	225	159	126	114	73	654	215	119	135	112	112	127	70	174	104	139	40	10	-176	48	-12	27	353	77	176	93	208	178	-330	13	-136	93	260	67	-120	-111	-132	33	57	135	94	91	-46	141	354	149	160	251	91
983	334	131	364	180	172	40	184	214	225	74	180	84	153	171	96	138	215	156	98	79	58	170	197	252	122	194	162	91	122	282	79	189	357	111	132	54	26	95	77	138	173	115	229	106	127	236	61	200	192
984	-350	-201	-619	-216	-340	-362	-389	-352	-349	-147	-312	-251	-211	-316	-152	-190	-121	-288	-263	-168	-209	-290	-410	-355	-173	-120	-186	-405	-114	-226	-363	-214	-418	-159	-161	-40	-32	-75	-249	-205	-293	-205	-250	-233	-184	-229	-279	-395	-413
985	-202	14	474	105	116	26	-13	-112	57	15	10	-194	-158	-16	-83	128	107	16	95	66	58	-45	-254	-334	59	-157	-98	142	-130	92	-218	-93	195	114	14	-134	-4	21	-109	60	-65	-213	319	117	-44	-54	15	289	-204
986	315	136	325	224	123	151	443	8	260	83	137	83	71	39	88	184	109	343	23	124	-89	96	180	140	161	221	261	108	62	24	-16	144	776	-14	192	109	272	103	97	154	65	129	123	121	162	206	96	222	-96
987	286	553	905	372	76	263	233	158	617	327	300	191	239	179	353	526	362	376	99	460	231	445	129	363	158	334	1095	842	-21	494	201	423	1206	34	276	250	412	171	-286	283	494	595	440	344	606	283	94	316	127
988	-19	11	-33	-40	-47	0	-52	-35	0	-36	-49	0	-11	1	-6	-74	-42	-4	6	20	-94	2	-89	-15	-24	-13	-18	-53	23	-1	-42	-21	-102	-43	48	-60	-57	-64	-13	8	-13	-14	-45	5	-72	33	0	-26	-86
989	-129	124	85	79	90	-165	-23	-106	98	351	97	20	123	-149	36	136	42	49	118	383	-4	3	131	-104	44	43	147	96	-314	105	8	154	-75	197	173	-157	97	135	262	196	82	138	118	-104	-62	18	86	-7	-108
990	-145	-71	-209	-287	-36	-40	-277	-107	-121	20	-127	-76	-73	4317	-55	-162	-310	-54	-13	-96	-89	-95	-191	-232	-93	-102	-208	-178	-144	-76	-98	-139	-243	-137	-26	-90	-327	-69	-139	33	23	-97	-33	115	-137	-159	-68	-128	-173
991	936	578	1096	688	315	602	897	1193	866	747	745	525	666	723	593	754	1343	670	466	986	460	646	856	776	720	645	1242	924	670	489	628	683	1455	338	480	487	510	301	530	635	722	396	559	449	723	911	521	971	788
992	32	10	66	1	9	71	3	209	39	12	95	63	2	90	39	26	47	29	-10	-28	32	87	36	89	23	28	68	96	57	11	136	64	112	73	26	57	2	56	24	37	11	54	-12	39	32	-10	10	39	-21
993	928	3045	1829	822	1681	1015	448	461	1551	1002	1647	600	890	1406	1717	735	1734	2624	661	3278	2361	517	750	1381	600	574	445	383	424	998	1239	1730	417	740	704	886	829	321	430	1025	1133	1797	2218	794	304	208	396	606	257
994	-255	-195	-471	-476	-3160	-304	-446	-250	-245	-235	-199	-212	-61	-105	35	-235	-219	-211	-184	-105	-168	-91	-161	-149	-190	-175	-327	-374	-446	-194	-37	-143	-534	-115	-189	-209	-250	-57	-174	-134	-74	-127	-104	-42	-189	-311	-25	-442	-550
995	-431	-329	-562	-533	-203	-355	-541	-628	-284	-268	-326	-201	-310	-347	-255	-302	-626	-176	-266	-283	-204	-404	-216	-311	-358	-320	-607	-535	-546	-387	-176	-378	-504	-220	-264	-364	-368	-176	-225	-323	-351	-267	-229	-219	-224	-375	-109	-484	-464
996	13924	25285	15794	21231	22273	14846	13050	18936	21792	13129	21920	19431	15106	22760	21306	15203	26584	19346	18615	23965	26106	19140	19709	22320	17889	15369	24531	13327	18352	13667	16498	19330	16063	19359	11569	13639	19630	7847	14974	15861	18172	24656	14669	11759	13705	12661	6115	22409	14490
997	-64	-87	-98	-90	174	-92	0	-175	-68	-108	-127	-48	-182	-1	-83	-94	191	41	-91	-29	-9	-74	-72	-95	-69	-91	-37	-111	-16	-55	-18	-172	-175	-140	-103	-584	-839	-60	-37	-72	-31	11	-54	-51	-59	-110	63	22	21
998	1092	840	1519	1275	592	992	1209	1932	1221	891	675	942	715	903	655	748	2226	763	618	909	748	982	925	1022	803	835	1733	1098	1753	1039	687	1162	1626	468	831	277	434	428	368	583	862	738	615	551	701	963	528	1409	1433
999	323	430	281	126	244	-122	280	149	-12	-207	-33	37	251	4	272	293	107	313	-134	170	-143	342	58	-139	1	274	190	323	106	96	113	360	189	15	151	120	-91	-30	-12	104	209	-184	251	178	287	296	63	-26	-286
1000	539	288	579	550	224	446	488	691	434	349	351	267	260	404	242	339	538	304	311	268	217	405	381	493	266	490	489	330	622	210	374	232	639	216	237	194	185	118	247	156	255	203	116	198	219	262	279	562	615
1001	80	418	74	33	51	56	72	52	-20	1	384	-12	170	166	150	-68	325	83	-22	161	199	150	-26	85	-19	141	10	0	58	156	65	53	1	68	43	-100	-148	138	7	228	278	97	210	205	-42	-54	-7	461	120
1002	-478	-191	-587	-479	-138	-398	-294	-263	-592	-293	-351	-399	-276	-157	-401	-499	-658	-137	-412	-283	-132	-189	-340	-331	-164	-129	-494	-502	-543	-266	-138	-274	-448	-206	-319	-271	-447	-93	-245	-224	-250	-116	-331	-333	-309	-406	-66	-549	-250
1003	-100	-146	-431	-593	71	-462	-381	-352	-340	-126	-177	-399	-122	-201	-298	-365	-188	2	-176	9	-37	-51	-516	-233	-99	-71	-236	-555	-305	-96	-138	-133	41	-225	-300	-74	-142	-49	-134	-84	-15	-225	-149	-54	84	-77	-134	-375	-151
1004	-91	-70	-55	-132	-13	-64	-107	-77	-65	-86	-48	-125	-5	-47	-29	-78	-65	-27	-88	-77	-37	-43	-79	-76	-51	38	-142	-67	-39	-11	-73	-59	-188	-114	64	-66	-60	-17	-68	-31	-87	-10	-38	-65	-89	-64	-66	-26	-91
1005	121	14	33	207	131	-183	176	286	-39	-119	-9	80	-53	-117	253	198	-125	995	-51	102	136	540	68	242	-41	167	151	77	281	153	-90	-57	-152	-70	413	-128	-681	36	349	277	59	49	81	-79	-74	-28	147	207	33
1006	-79	-164	-63	29	-107	17	-42	-71	76	-134	38	-48	-130	-14	10	-110	-215	-54	-74	-115	82	-77	72	-182	-1	-131	3	-96	-90	-85	-174	-182	-52	-64	105	-435	-456	1	3	-157	-147	-97	-167	-128	-59	131	-228	-123	-96
1007	-447	-340	-467	-569	-180	-720	-841	-488	-148	-265	-224	-311	67	189	-148	-236	-126	-112	63	-26	-164	-461	-522	-265	-188	-118	-622	-424	-158	-77	-170	-205	-579	-471	-374	-88	-468	-326	-66	-7	-202	-142	-150	-219	-194	-296	-114	103	-204
1008	640	373	1138	462	411	376	789	520	556	439	480	356	412	319	255	376	754	505	256	458	377	439	319	516	385	525	949	659	569	427	336	501	1059	208	353	216	213	223	108	452	461	391	598	395	314	695	355	692	529
1009	11003	12850	12401	10988	14453	7754	10234	9339	14765	9213	12541	11095	7957	12275	12432	10574	10255	11376	8963	16110	7424	11982	7838	13399	11475	9819	8186	9378	5760	8030	8857	13018	3688	10187	8660	8482	12457	9233	7266	11246	10268	13881	12863	9412	8415	6095	7117	12539	7538
1010	244	101	30	301	274	44	1211	322	123	64	269	126	556	206	334	313	138	116	751	1873	493	213	104	1135	76	128	6	89	184	142	220	1186	27	676	343	284	211	127	18	110	187	2116	285	175	504	216	254	-14	14
1011	491	346	634	478	448	344	831	610	676	442	575	350	512	714	504	407	686	339	400	505	26	243	296	488	345	241	397	391	433	507	409	435	505	245	519	327	453	418	235	297	261	525	472	246	426	419	315	402	466
1012	-396	85	-117	-473	187	119	603	-673	420	-137	510	-224	-175	121	143	-270	-245	-282	-156	176	-298	179	-32	527	-199	-320	-1561	-94	-109	-12	-176	-273	-1530	358	-137	299	-317	14	-228	61	-122	68	360	111	152	198	279	-462	-536
1013	517	388	749	797	346	517	683	670	605	132	306	477	325	314	173	294	134	402	240	237	303	219	573	497	266	382	337	487	525	204	298	542	414	396	288	99	-32	606	286	108	273	312	422	256	267	399	310	336	406
1014	-39	-309	-127	-381	180	32	-60	757	295	-6	-56	310	167	239	-72	-51	62	26	159	84	73	-41	-70	-87	-95	-250	114	-593	2275	24	0	33	188	118	-163	-88	-280	-57	666	-236	-137	-185	-257	-290	217	-486	73	198	-185
1015	240	299	293	65	43	200	304	70	257	239	197	60	49	183	150	227	176	190	136	73	66	112	72	56	170	25	400	91	319	219	180	44	500	115	62	13	-236	157	116	146	-26	83	108	145	154	247	50	264	76
1016	204	842	766	433	592	631	416	47	1321	1068	575	343	622	525	887	268	394	811	951	1214	667	188	590	727	255	289	65	265	216	544	563	780	591	968	396	885	648	394	462	334	177	505	713	547	704	211	587	288	175
1017	296	199	-173	-164	-3	129	-277	-410	259	-119	56	-27	66	231	53	-40	-249	23	-149	-9	-91	103	-222	264	443	57	-164	41	-221	15	67	-98	-230	64	2	-219	-149	-194	-346	81	125	-65	-65	65	-94	-7	216	-60	-230
1018	11	-21	106	83	16	-58	-126	2	-36	-77	-74	-94	15	-138	-26	-88	-146	-8	-22	-109	-138	35	-284	-26	120	-79	100	-19	-64	85	-6	-11	-139	-114	-115	-99	-120	76	-4	-26	-21	-7	89	-32	-32	59	12	-226	7
1019	-104	-4	53	58	323	71	68	-143	81	160	130	114	122	205	296	2	-14	91	21	244	-82	-125	17	26	-10	-30	-40	-2	-125	91	65	95	-51	236	-60	324	239	340	-27	223	-18	255	687	77	119	18	101	-208	-40
1020	260	-128	731	40	322	101	144	-64	22	12	-12	25	60	-61	-17	36	246	433	-95	65	237	151	-376	59	170	147	794	417	673	219	92	0	894	-26	69	-114	-314	114	-143	-161	362	316	89	55	-162	211	88	-158	-206
1021	76	373	436	260	4031	309	162	164	401	132	313	143	95	298	264	271	334	290	117	440	-3	36	220	213	116	170	128	395	13	129	180	117	277	236	-4	137	308	200	267	217	126	236	390	119	202	180	71	92	28
1022	-239	-241	-394	-236	-96	-167	-47	-509	-207	-71	-162	-178	-137	-259	-256	-86	442	17	-178	-404	-374	-188	-402	-115	-66	-16	330	-678	-229	4	-281	-172	-202	-190	-144	-192	-268	-47	-66	-156	-186	319	-176	-149	-269	-41	-38	-665	-591
1023	-2820	-3276	-3675	-3361	-1706	-2766	-3537	-4374	-3493	-2100	-2403	-2392	-1911	-2527	-2496	-1403	-4941	-1142	-2243	-3329	-1089	-2981	-2695	-2205	-2744	-1281	-3007	-2771	-2898	-1713	-851	-1510	-4260	-1947	-2516	-1965	-2446	-1306	-2179	-1795	-1940	-2774	-983	-764	-1904	-2235	-1502	-1941	-2387
1024	11216	15296	12911	14866	17193	9618	10481	13639	14621	14909	15308	16309	17841	14996	15507	16152	14263	14316	15996	17978	20045	14275	14087	16466	16188	16364	17153	10894	14278	16958	19194	17884	15690	16051	14133	14412	15299	12268	16020	15920	13454	13705	16982	15887	12137	18910	9224	16367	14769
1025	877	333	7	755	357	232	500	380	10	112	43	1360	1916	239	877	334	386	137	408	563	713	1884	134	415	1628	347	373	898	351	4487	329	919	116	381	444	1116	647	971	103	309	2087	2189	1473	1147	74	203	455	491	413
1026	147	135	589	111	29	40	211	341	105	188	38	41	23	62	18	21	211	64	102	22	118	86	262	55	139	99	306	178	159	91	63	63	163	62	-103	66	57	15	49	61	106	143	90	111	172	115	15	108	247
1027	-189	-404	-585	-408	-30	-133	-349	-419	-446	16	-140	-379	-130	-208	-44	-102	-214	-35	-120	8	-38	91	-100	-295	-55	37	-92	-183	-139	-44	-84	45	-264	-264	-346	-10	-87	-10	-346	28	111	-100	-80	-346	32	-38	-185	-28	-204
1028	4767	5058	6013	6422	8842	3739	3952	3805	9011	6770	6400	4338	6551	5968	6190	6270	7589	4520	5904	15775	13058	5694	4512	6208	6211	5844	6444	4704	3785	6299	6247	9361	6229	5677	4331	4480	5727	4580	5148	7554	6936	6992	8839	3903	4673	3154	1644	9472	4371
1029	-74	77	-49	-146	-12	8	-26	-163	-135	-59	-52	-12	-68	185	-131	100	-145	-15	-1	-40	-77	10	193	-63	80	-79	-143	-176	1	-62	-170	-142	-240	-39	-31	-42	-80	-37	-38	-11	-49	-7	-65	36	9	-262	-111	-205	-81
1030	215	135	94	49	76	193	231	178	240	70	145	127	12	197	-46	75	-9	144	-24	-74	14	160	271	135	120	-44	4	67	125	-76	37	-29	155	103	127	-4	-24	83	-1	61	29	-25	-32	-35	79	200	68	130	139
1031	-227	-40	-431	-266	-104	-396	243	-130	-255	85	-235	-211	-89	-182	-256	130	-100	205	154	117	-134	-133	-229	-152	-6	137	-136	-164	-83	157	2	-48	-287	126	134	-65	-177	197	-102	-120	-101	-64	144	-65	157	517	-132	-343	19
1032	14255	15210	16774	15804	17521	16597	18557	9859	16056	14826	17018	16362	12715	15810	13717	14963	14811	14980	14262	16053	20306	17695	17513	16138	15090	11923	17557	13363	13948	13223	13635	14363	15318	14968	11871	12012	14464	14463	15514	15535	13760	14688	16433	13166	14100	9519	9338	16024	12181
1033	-397	-356	-857	-398	-192	-480	-280	-664	-609	-527	-425	-132	-484	-450	-311	-444	-508	-342	-473	-570	-332	49	-353	-206	-420	-449	-525	-753	-563	-323	-344	-496	-913	-324	-399	-247	-313	-79	-224	-416	-421	-270	-438	-459	-376	-504	-592	-649	-771
1034	875	917	841	912	218	714	1048	622	662	529	484	538	367	657	466	480	276	368	491	368	552	231	642	664	620	401	500	835	772	620	382	763	897	330	497	391	420	431	368	419	413	454	448	408	259	579	447	914	961
1035	240	187	257	39	147	209	107	181	203	161	159	58	147	125	34	75	295	222	54	135	92	108	108	107	137	107	222	434	58	77	231	337	454	92	57	66	37	216	137	162	289	223	260	76	119	177	144	223	170
1036	789	627	1104	679	367	633	746	559	499	772	810	566	384	785	590	768	553	308	259	465	292	527	571	542	477	489	691	596	639	109	275	401	773	247	79	183	134	254	219	771	731	424	551	655	349	769	399	864	454
1037	-1	-135	-138	13	-8	-42	-178	-44	-131	-12	-148	-125	-39	-47	3	-47	-99	21	12	17	-113	-81	-53	-77	-65	-100	-57	-43	-98	-73	-48	-38	-61	-90	14	-50	27	17	-116	-38	-53	-99	-28	-62	52	-92	50	-62	-137
1038	-278	-253	-144	-65	-44	-220	-265	-424	-453	-150	-130	-179	-119	-170	-188	-175	-322	-65	-152	-250	-96	-238	-172	-308	-39	-157	-372	-28	-241	-304	-105	-181	-103	-192	-50	-5	-49	-98	-119	19	-154	-233	-158	-35	-47	28	-137	-267	-336
1039	-381	-221	-79	-635	-234	-647	-3501	-971	-21	-586	-651	-419	-358	-548	-510	-1017	-1549	-1056	-1131	-137	-1249	-1671	-313	-756	-1284	-1344	-3731	-1706	-1655	-717	-943	391	-2216	-479	-386	-155	-206	-270	-626	-687	-1346	-1170	-596	-645	-1180	-1483	-892	-525	-1428
1040	288	345	637	179	454	250	347	493	539	332	283	260	499	371	225	290	325	437	334	452	234	448	218	142	474	260	480	613	371	536	489	904	445	67	399	268	194	609	496	451	191	583	651	369	307	378	439	429	182
1041	-41	209	218	392	166	37	78	-1	285	167	290	153	224	374	-43	91	125	64	205	418	187	68	-93	67	222	-15	-93	-103	300	627	302	350	132	106	-7	124	89	202	145	410	170	314	295	119	139	0	106	297	72
1042	22	354	1096	566	292	522	307	818	778	634	551	498	753	520	114	32	359	294	198	330	72	228	598	247	606	142	287	429	320	604	254	724	961	118	259	490	134	495	270	141	247	29	220	152	661	548	899	696	529
1043	-40	-136	-70	128	-38	42	166	-43	-148	-187	-294	-4	-139	-146	-58	-165	-152	-163	-47	-254	12	-211	45	-50	-191	-74	-23	-212	-26	-111	-252	-204	-188	-3	-144	-249	-190	115	-80	-57	-142	51	-144	5	-154	-69	-5	-145	-134
1044	541	378	456	476	214	512	620	722	592	349	428	412	298	428	332	407	739	295	313	433	352	428	490	539	532	292	694	123	524	294	308	344	732	386	225	286	313	343	512	365	327	479	379	215	386	453	238	631	437
1045	-325	-343	-256	-242	-110	-334	-579	-475	-462	-310	-277	-298	-115	-274	11	-87	-161	-389	-211	-43	-284	-498	-208	-65	-36	-290	-366	-284	244	-111	-90	-374	-549	-14	-52	-51	-111	88	-106	-101	-369	-242	105	-324	-272	-422	-68	-397	-516
1046	206	215	-19	4861	2360	35	4869	268	108	90	87	829	260	139	2296	2334	482	68	1333	647	3064	459	100	4385	726	378	787	197	2239	212	1132	903	1776	2925	802	244	300	72	566	98	190	3440	732	1509	1080	121	625	2463	2176
1047	607	289	720	1523	787	467	645	836	669	479	391	488	491	676	349	358	1125	596	842	864	737	360	1248	562	678	570	837	1221	569	746	876	735	1213	533	502	290	796	399	314	397	355	717	421	535	409	679	386	1014	997
1048	56	62	62	141	50	62	173	97	109	56	97	20	-71	94	8	21	266	-154	50	148	-71	122	163	-30	103	-105	159	-267	147	41	115	-33	139	54	86	69	182	-40	83	-9	-173	-25	3	-1	104	-56	10	206	98
1049	225	194	221	443	116	128	120	187	95	292	167	307	312	158	326	486	357	146	63	268	61	173	332	229	233	356	506	60	121	206	208	261	330	261	110	206	416	145	307	358	165	365	357	186	396	270	254	152	79
1050	89	190	273	150	128	225	241	506	246	147	198	135	128	210	183	156	362	178	186	146	98	228	207	143	206	199	413	149	231	206	92	189	453	164	112	191	256	93	176	172	185	76	11	102	204	373	134	171	81
1051	-519	-808	-783	-1047	-323	-780	-761	-1451	-867	-357	-473	-712	-492	-748	-509	-261	-588	-293	-305	-1	-460	-835	-710	-411	-370	-349	-1143	-506	-743	-118	-239	-563	-896	-270	-302	-432	-664	-248	-708	-309	-354	-598	-400	-401	-282	-404	-432	-919	-844
1052	-113	-28	-307	-126	-88	-190	-48	10	-25	10	-50	-34	-40	-54	-97	-196	-30	-42	-47	4	-102	-31	-5	-73	50	-48	-23	-74	-247	-42	-323	-52	-304	-6	-98	11	-9	-51	-24	-138	-223	-64	-91	-136	-64	-185	-27	-93	-62
1053	486	429	654	423	239	426	532	610	535	349	363	403	198	385	339	365	368	288	428	438	480	389	309	93	584	363	461	197	487	297	445	325	636	277	257	329	244	275	278	292	253	208	307	203	257	422	226	632	485
1054	786	521	716	798	563	657	909	791	926	701	522	395	505	668	443	709	1118	527	622	734	421	618	672	712	447	623	1018	304	953	579	638	664	1012	457	353	466	304	505	417	561	677	650	739	438	471	167	271	804	834
1055	170	178	359	372	906	330	257	136	858	131	48	14	429	322	708	498	424	112	396	682	547	-155	167	374	196	97	-73	-260	259	132	298	908	55	793	444	-35	-153	519	440	-37	-70	487	709	-94	89	236	106	-268	12
1056	17	66	-86	-87	100	-40	89	83	-38	-26	-72	-5	-105	-74	1	70	53	29	39	13	22	-49	-148	-64	46	61	68	-197	-39	-12	-113	-47	103	154	-12	-68	-78	51	-15	-53	14	-4	-63	-28	117	-77	35	-238	-98
1057	-246	219	-175	39	99	46	-72	136	-139	-170	-101	148	-131	4	-54	-42	-234	-97	92	-147	-162	-83	-142	-58	192	-157	469	-33	24	-6	-140	-160	-49	-25	-16	-29	-13	218	272	-49	113	-10	-158	-70	-102	-159	-101	-321	-4
1058	-14	-14	4	-63	33	-65	40	92	-40	49	-8	31	15	55	44	59	-15	62	10	40	-2	18	-43	-11	-6	-1	98	-67	-27	-11	100	44	48	-62	84	8	53	102	35	66	30	50	40	-1	64	-82	45	-70	24
1059	-1426	-1150	-1784	-1418	-1180	-979	-389	-1128	-786	-750	-1127	-711	-1046	-890	-541	-815	-2028	-1005	-531	-1377	-620	-695	-159	-760	-811	-829	-776	-770	-1297	-884	-544	-901	-1018	-464	-730	-367	-938	12	-787	-613	-829	-885	-1115	-626	-99	-723	-566	-1083	-945
1060	234	167	421	206	139	74	102	244	133	173	157	58	21	253	96	182	239	146	79	67	179	26	151	278	245	46	195	357	4	197	149	95	230	54	12	206	133	53	165	19	95	168	40	79	152	169	35	234	288
1061	493	513	740	509	483	515	630	554	790	320	631	360	396	439	278	512	685	485	426	588	212	451	490	468	541	428	650	412	404	474	537	469	676	194	365	345	450	493	306	435	469	658	514	384	474	566	434	619	617
1062	2447	2527	2785	2390	2833	2066	2627	2634	3610	1996	2744	1151	2234	2607	2115	1835	2069	2187	1137	4008	183	1901	1635	3002	1789	2627	2040	2148	1285	1581	865	2006	1987	1892	1468	2438	1590	1820	1304	1012	2414	3132	2803	1938	933	1202	1522	883	1279
1063	956	923	1658	772	770	485	1401	1572	792	952	653	538	762	669	301	932	1023	784	799	1315	577	885	1295	454	539	807	1273	811	1005	476	491	1071	1814	416	519	358	278	610	708	843	1090	923	984	292	574	1282	757	912	1211
1064	1673	2550	3322	2310	2934	1479	1618	355	2927	1468	991	2075	1652	3515	2653	1589	1665	2448	956	1269	109	338	463	2647	1042	449	544	531	714	576	983	955	960	760	860	723	478	1090	1370	1132	1163	2753	2155	3056	728	535	945	1418	791
1065	294	337	341	226	78	218	324	442	102	173	202	117	186	268	146	308	241	190	243	344	139	320	70	143	130	120	488	330	187	150	275	340	500	181	146	75	244	116	142	173	243	104	134	152	194	450	185	234	254
1066	334	208	215	240	88	188	193	145	53	190	386	153	122	184	70	259	187	193	173	134	188	58	11	33	179	239	292	132	284	185	126	386	151	225	57	123	81	98	116	175	105	180	108	115	297	139	269	32	327
1067	-363	-63	-517	-165	-62	-177	-270	-307	-332	-312	-222	-206	-257	-306	-34	-153	-215	-239	-275	-273	-77	-201	-248	-183	-257	-285	-353	-229	-213	-67	-75	-346	-507	-133	-151	-186	-137	-141	-210	-220	-246	-58	-338	17	-212	-368	-188	-417	-187
1068	65	-212	-106	74	-53	-161	-68	-286	-160	50	-189	116	21	1	-25	145	86	-24	64	-256	87	-66	-201	-6	-35	-44	-137	62	426	-273	-21	204	-189	39	-218	-75	145	115	-92	-7	-101	150	-68	-72	122	-110	61	65	218
1069	330	189	189	521	131	227	373	278	69	50	56	97	83	119	128	190	-32	15	31	221	151	315	15	245	89	31	59	449	153	-246	140	48	148	73	14	62	255	197	88	35	-13	9	144	47	52	-5	83	102	211
1070	1879	1533	2154	1302	674	2587	1740	3550	1420	1408	1930	1175	1588	1787	1428	2381	2077	1756	1729	2503	2558	2067	2904	2380	2226	1617	1563	2216	3045	1556	2221	1797	2877	1443	1564	1956	1709	856	1745	1699	1498	1431	902	1598	746	1776	1344	2151	2690
1071	367	211	410	366	137	259	386	433	328	106	231	176	167	289	169	236	418	294	145	236	222	320	315	414	320	183	395	328	297	82	203	196	427	192	233	217	217	108	235	204	211	212	248	58	259	324	162	274	372
1072	836	609	792	496	490	451	1078	442	831	411	450	198	1141	567	525	759	2011	774	792	1554	799	736	300	833	767	960	696	591	547	738	571	860	1457	743	490	644	412	509	628	774	827	1182	883	929	594	901	528	1001	526
1073	-185	118	187	434	194	-65	248	-64	-74	-126	-65	129	223	266	69	249	263	85	-171	-179	159	11	-70	221	336	189	212	-212	223	-280	-170	14	-239	82	-189	-126	272	-20	58	139	209	81	185	27	-149	597	-114	538	14
1074	5807	12826	11763	7133	6423	10009	5912	3775	13407	9922	7458	6351	10209	13606	7857	8133	13962	9903	5091	11909	1621	1881	8076	8613	4908	7766	4395	6290	6532	6777	6108	8751	7547	7047	4932	7301	5670	5610	8169	7237	6630	9180	9407	9331	9806	5901	7292	8409	5044
1075	-273	-169	-464	-395	-61	-190	-294	-257	-263	-35	-193	-68	-52	-153	-103	-26	-144	299	-68	10	-93	-285	-313	-119	-207	-4	-219	-260	-203	-15	-92	-73	-280	-72	-57	-121	-71	-83	-66	-57	-35	-83	-39	-36	-92	-133	-73	-132	-201
1076	581	537	804	676	425	128	757	859	657	384	366	71	157	475	289	950	1066	496	83	537	381	443	455	557	622	588	824	473	111	217	300	313	1074	297	629	499	355	394	442	301	367	363	277	218	436	834	279	630	406
1077	849	1096	1196	1192	1497	1194	720	959	2074	950	1078	834	922	1434	1216	1323	2021	1435	1233	3236	1255	585	870	821	940	800	1223	523	1338	785	884	1674	1676	1000	1372	518	3440	799	1265	767	682	1859	1927	674	1048	1215	452	1255	759
1078	2018	650	573	2291	2796	405	1829	2497	1204	324	264	472	1591	999	2352	2576	1875	2150	1338	4443	1040	1191	579	2741	569	2088	1702	1001	872	844	926	1924	2186	2158	942	2090	1588	561	1146	704	1231	3090	2412	540	1490	1593	724	803	430
1079	-667	-241	-624	-408	-190	-494	-294	-1109	-660	-143	-414	-347	-270	-538	-286	-113	-356	-161	-431	-115	-198	-588	-448	-672	-538	-93	-330	-393	-531	-269	-428	-196	-557	-366	-334	-302	-285	-157	-196	-87	-269	-141	-97	-170	-217	-193	-180	-494	-634
1080	-16	59	241	57	-75	-17	35	-94	33	13	-13	-90	-13	-11	-17	26	172	-5	23	-131	19	171	91	15	44	-7	167	-82	30	84	54	74	-32	-15	-139	-37	58	27	24	55	-93	69	-16	-8	-97	-15	33	117	40
1081	195	74	150	123	440	44	87	-122	509	59	86	34	680	436	359	174	527	238	42	585	266	-102	-22	357	82	340	-93	57	2	99	191	764	34	297	-9	336	472	189	122	118	87	882	567	69	259	226	292	-83	-79
1082	9621	5137	9518	13522	14321	9271	10811	6755	17246	8487	11557	15181	8798	10988	13845	10014	10361	10262	9433	18927	8384	10391	8619	12286	9012	11109	8781	5907	6167	8816	8361	10661	7007	15895	2757	9047	10380	11977	9783	9046	10990	18753	12299	10610	9294	4771	5828	12014	8663
1083	2202	1250	424	-36	245	30	384	665	353	277	149	498	2794	332	281	550	741	67	343	1698	333	279	136	231	681	1609	408	1776	-102	1773	680	1714	817	233	1581	1303	912	1136	1783	1575	2180	220	3024	284	272	1060	3479	129	230
1084	1211	655	1351	1017	543	769	1226	703	1122	632	676	390	676	521	515	888	1128	579	567	707	495	682	790	698	550	683	1315	968	1614	637	533	648	1675	353	141	567	547	460	493	553	810	521	616	564	709	731	701	1203	1067
1085	530	319	571	290	215	307	307	437	495	619	294	270	388	328	298	401	258	179	273	309	183	414	419	388	747	371	394	569	412	356	287	308	510	288	300	252	276	232	389	190	278	365	272	227	174	278	53	252	334
1086	6350	1751	2818	1658	944	1410	2081	4386	2693	1804	1566	1746	8666	1405	869	8505	2268	1474	7857	4760	1253	2521	1377	1742	4091	5807	2746	6109	3545	3047	2126	4498	6996	751	4396	3700	1967	2103	2872	2419	3955	980	1875	1301	1263	2003	9956	2450	1899
1087	200	219	291	203	376	80	220	202	352	228	153	70	411	224	258	301	274	146	184	765	86	198	108	403	121	137	139	142	142	185	239	302	226	270	50	155	123	241	131	114	141	238	284	95	164	136	254	162	139
1088	83	26	86	6	91	60	47	58	99	14	76	18	84	63	11	78	48	97	55	73	-2	128	79	92	44	75	109	41	-19	60	-63	42	25	37	14	1	-41	77	68	44	127	3	34	81	34	48	15	128	57
1089	-38	197	158	-103	325	17	-228	-229	215	93	189	8	13	243	181	262	159	218	530	391	126	-117	94	151	167	230	-212	53	68	442	189	151	-354	76	177	128	69	-183	106	138	109	97	242	167	-34	59	221	200	365
1090	6895	10249	9799	8140	7649	8850	6334	3970	11444	7301	10013	10993	5434	7739	6947	5748	5902	2880	3887	10744	9068	5832	6879	7294	5468	3196	5304	4823	3544	7214	3927	6795	3809	5831	4139	5012	3578	3868	5433	4332	6734	6258	4659	5699	3053	2806	4199	5700	5701
1091	483	43	539	23	99	264	146	-419	273	102	253	173	260	-119	-7	318	100	408	284	-76	66	231	148	92	89	249	255	485	-434	421	65	18	471	-28	-144	-160	215	118	44	112	221	13	45	14	67	473	114	113	-158
1092	381	2320	214	429	1557	1340	488	-230	753	509	14	632	792	593	1155	110	-236	1287	413	170	64	133	-34	503	335	551	-136	-74	445	167	1342	749	86	244	370	160	318	1171	357	374	181	634	1683	2061	499	375	1100	685	149
1093	299	311	153	20	258	48	52	94	12	51	102	-4	37	866	30	10	7	84	-13	109	48	-22	3	-59	37	115	10	84	175	31	50	0	182	43	81	-146	-68	-46	7	114	106	160	104	551	47	66	101	-3	19
1094	800	458	798	402	419	456	833	376	562	483	481	321	430	504	279	546	371	431	484	446	262	507	533	538	406	516	572	828	469	356	558	675	760	381	562	211	291	427	471	393	390	291	476	482	381	677	551	679	663
1095	96	390	108	63	357	44	-85	-104	242	211	385	84	95	156	192	42	-45	111	34	44	86	57	9	308	23	31	-75	-65	231	51	71	162	123	114	112	5	66	140	12	87	227	18	203	203	-14	-41	71	489	40
1096	455	409	521	268	441	401	361	-20	522	312	434	119	249	566	298	265	210	492	158	313	82	192	379	469	269	372	287	125	344	399	367	632	555	212	194	296	306	235	179	264	182	182	445	64	312	332	218	146	266
1097	215	166	183	121	26	156	218	158	120	60	110	114	61	106	31	131	127	84	60	71	126	111	64	150	131	112	355	118	115	85	42	118	330	45	137	-1	-1	96	47	113	75	180	54	10	117	303	25	183	62
1098	-152	-113	-150	-93	9	-24	13	-101	-24	-76	-217	45	159	-211	0	-166	-214	-79	-77	49	-7	-96	-56	-41	-168	22	-250	-248	-83	-64	-144	385	-243	-29	-28	-348	-145	59	-58	-9	-33	415	102	-40	-242	-190	-129	-225	-98
1099	138	176	182	191	312	151	230	148	242	79	85	81	169	256	242	129	196	161	46	511	638	52	79	311	161	90	101	72	143	175	189	307	109	300	223	155	174	106	216	39	65	333	149	62	107	82	68	90	122
1100	-50	-36	-80	-90	16	-99	-45	5	-54	-78	-51	-30	-33	-46	-81	-76	53	375	-36	-27	42	-32	-55	-56	-80	-25	-21	-57	-21	4	-4	-101	-22	29	-36	-237	-29	10	18	-24	-110	45	-83	2	-129	-128	-25	-35	-57
1101	68	67	75	-8	93	-39	31	29	59	-18	-23	0	-17	108	-14	86	110	20	-14	92	111	117	39	32	138	23	12	89	70	11	332	104	163	-7	-43	40	-54	-7	51	81	38	97	5	12	9	169	7	56	149
1102	570	217	851	695	624	551	369	230	616	172	252	142	1280	420	854	304	525	793	318	348	258	151	657	472	235	83	267	427	165	207	340	1078	159	453	346	317	155	90	157	165	115	282	177	59	399	708	360	68	274
1103	127	-1136	1206	737	55	192	-1	-592	329	173	504	-196	-201	-186	-194	187	-1608	-255	-163	-388	-36	11	112	-15	-288	-1317	-148	57	319	-633	60	-570	-307	39	-461	300	-374	-310	-564	180	-125	-253	-33	-68	-259	-759	-259	821	-3073
1104	221	1813	-163	1275	1262	80	1112	-115	-149	307	816	2128	2502	-360	1709	1123	1533	-143	1468	999	-57	201	-281	1186	2253	124	29	1342	-237	1319	575	2800	-24	994	1088	416	1899	965	171	387	3159	1876	1987	174	49	-48	721	560	-358
1105	204	162	679	20	302	232	152	332	561	890	525	205	456	196	48	225	214	380	208	1447	396	353	216	237	1164	508	223	1711	60	73	247	383	645	59	48	-109	731	114	971	592	245	351	263	288	-49	190	-27	437	122
1106	386	508	1291	125	53	842	-84	358	1165	333	591	-67	104	2140	12	-7	133	-78	-25	-96	49	17	254	65	-76	-60	-297	-120	-24	-284	121	-158	-192	-59	-151	447	-344	2	-15	984	481	-172	608	547	-172	314	-17	181	43
1107	0	-7	-11	-42	-15	-12	13	73	-24	-32	-42	-66	-44	-11	-15	-77	19	10	1	17	-9	1	37	48	-5	-26	-40	-33	14	-22	-2	-24	-56	56	-93	-48	-14	49	-10	-17	-29	-4	-31	-2	-62	-20	-38	-24	4
1108	251	151	611	124	163	321	210	313	423	164	40	148	107	174	156	151	245	79	50	68	149	88	208	116	56	169	383	193	535	168	84	82	296	147	302	108	178	121	196	201	137	447	134	283	449	460	63	126	247
1109	1158	15997	3925	-300	197	586	465	1095	582	865	700	4666	2286	13330	1787	1571	8390	-112	4812	2617	6106	-394	4037	-191	13928	4546	-134	7	3226	2188	4660	700	2079	151	6482	214	1087	1101	2374	6595	1947	1839	8656	20520	781	149	1105	269	3986
1110	2398	4000	4429	1501	3678	1922	1043	751	6084	3448	2926	1284	3369	2632	2766	1922	2725	5147	1604	4028	2013	1485	1025	2404	847	1651	862	1542	1547	1092	1805	3106	2420	1897	1437	2416	1405	1152	1406	1337	2543	2984	3162	2210	1977	1027	1942	2376	1966
1111	528	313	761	398	196	295	374	347	344	210	253	153	282	212	185	339	565	320	241	364	198	333	303	307	217	327	719	516	207	269	319	316	643	159	199	108	178	40	241	228	355	283	307	288	376	296	167	384	276
1112	-454	-774	-5	-1242	1332	-259	-110	-605	754	415	-49	-227	621	-672	1427	-91	-468	10	-343	2445	379	-304	62	915	-259	194	-1677	-601	38	-212	371	-109	-682	298	-55	-369	106	-57	-417	-230	-233	47	228	604	4	-252	-7	1	-531
1113	212	1346	880	10076	13149	531	4652	133	6915	696	544	1806	399	1342	5151	470	4109	6975	145	187	16	179	279	7505	179	244	111	-26	1856	179	901	458	366	6858	221	163	496	373	355	291	283	18459	1963	8190	3170	97	177	4770	1118
1114	99	422	-311	-88	75	7	-109	-250	-118	38	5	-8	-110	219	-19	16	424	-60	0	548	-58	-32	51	73	14	26	37	-72	183	165	0	90	-72	-45	-132	103	-139	72	185	44	-31	47	155	-38	-114	-51	0	-103	209
1115	167	-206	696	479	15	314	678	679	146	283	-307	247	84	47	257	-154	150	80	0	1304	187	414	248	-27	-9	58	450	164	427	19	319	599	-1	324	374	121	315	425	-41	202	-57	983	72	224	369	440	693	167	252
1116	199	418	380	542	450	232	552	346	711	198	292	241	653	414	245	244	701	484	274	775	539	307	62	361	175	229	172	74	90	602	355	736	354	330	192	198	286	275	250	321	351	742	1395	730	134	121	442	425	589
1117	1338	398	1254	1408	455	1120	1712	1962	1051	1078	557	505	405	1196	1089	499	340	282	452	320	93	1303	613	1051	521	462	469	1219	1261	1115	890	1278	636	560	932	923	354	405	512	389	929	993	997	900	461	592	485	1373	1493
1118	285	489	313	429	330	360	287	236	400	241	178	244	179	943	271	254	130	144	194	459	16	109	313	239	176	156	145	231	181	206	285	362	417	331	209	54	167	321	259	259	202	283	324	215	219	187	251	263	125
1119	977	1940	1197	1526	1749	807	282	365	2650	1596	2259	1322	1415	906	1787	1103	902	317	607	3079	854	99	742	1309	485	1275	208	555	231	1267	865	2067	510	2288	713	2763	1242	1820	840	1005	727	2893	1488	1320	751	-2	1113	873	240
1120	2117	4069	3726	1154	1209	2197	13	1479	4040	1996	2660	776	1561	1868	1648	1715	1949	942	657	3916	6050	1361	1223	2207	1304	1456	1264	2264	1102	1125	888	3629	881	1022	1074	1819	1058	1355	1373	2160	2015	-50	688	1358	209	697	1344	108	48
1121	-29	-65	-77	-116	-15	-120	-5	-97	-83	-147	-251	-74	-56	-94	-34	-127	-13	-90	-101	25	-82	-194	-144	48	-130	-44	-168	-164	128	-102	-77	-155	-131	-98	43	472	-66	24	10	-63	-34	111	-80	-19	87	-115	-27	-192	-223
1122	40	89	3	-76	33	151	57	55	247	49	123	-50	93	147	97	-22	118	-24	-18	2	-86	153	-98	122	-58	59	-65	53	60	52	111	-154	125	17	531	219	20	272	17	165	130	127	14	50	441	339	449	154	-64
1123	-7	-9	-231	-39	-11	-37	-87	-74	-31	-12	-61	7	-8	-47	1	-137	-14	-33	-24	17	-116	-81	77	-31	-76	-48	-57	-202	-96	15	8	-61	-135	-37	-76	-4	6	72	-27	-64	-38	48	-40	-14	-89	-38	33	-83	-110
1124	190	-79	183	197	63	-62	47	220	27	186	106	-83	148	63	290	322	-376	-8	67	202	-229	-15	212	216	117	179	-248	-270	-345	-31	-35	177	-133	-125	48	-31	-190	-249	-41	243	143	-49	123	-87	42	332	66	263	76
1125	1132	795	1109	1661	2132	947	1330	653	2451	779	1292	1062	1688	1245	3736	2072	1239	1554	2074	3411	1455	66	948	3684	1259	2252	1312	704	1311	864	1197	2782	1508	2669	1211	1369	2119	1186	1150	589	1111	1880	1240	814	1001	1212	1619	1343	1014
1126	695	334	646	579	213	487	371	613	544	210	153	277	383	377	426	537	99	141	214	167	316	319	336	423	-4	262	455	569	374	153	-18	441	726	316	367	303	191	410	396	153	385	328	312	333	104	530	111	515	281
1127	2140	3003	6947	3711	2874	4922	2713	637	7269	4682	5519	2717	3112	3805	5296	1760	2281	3207	1768	4455	5274	2922	4058	3037	1835	2174	824	1204	1835	2100	1500	5393	2000	3486	2451	3596	1768	1276	2326	1333	2647	2548	2353	2065	2563	1884	2628	2410	2092
1128	584	389	679	1055	354	119	388	380	393	865	390	362	558	430	677	559	703	647	308	721	74	496	142	210	503	473	1533	736	323	616	416	363	2121	328	-235	401	206	-64	388	620	501	655	276	295	656	597	518	793	223
1129	11	3	36	23	24	0	-16	-46	-46	56	11	11	22	43	26	30	44	51	93	95	-1	56	39	50	43	140	156	36	-61	-13	-25	65	29	15	-28	11	-77	10	15	57	94	44	3	-42	-9	-30	5	-31	50
1130	696	795	939	893	1201	215	215	391	1022	300	1015	344	764	866	1227	692	451	490	425	1824	1286	401	482	1180	701	499	284	159	197	681	636	1075	545	613	588	466	951	366	595	337	425	1432	1093	386	279	278	7	539	401
1131	-11	-10	-120	61	18	19	-23	-68	-29	-41	1	-33	32	-21	-14	17	-21	16	12	194	31	15	94	-14	-26	-13	-81	-14	-20	-12	-35	-29	-24	-45	14	35	-9	-28	12	6	21	41	-66	-9	14	-5	48	-104	-12
1132	4483	8334	7445	8127	10367	5005	5855	4826	10496	10431	8529	3699	10806	7995	8677	5577	11682	6625	5007	12931	5811	4407	5390	7804	8427	6653	6282	5738	6453	7602	5018	10813	8003	6328	3269	3904	9625	4344	4953	6290	8311	8866	12184	5765	5886	3932	2099	10377	6814
1133	524	413	975	786	531	656	779	643	820	448	413	399	273	583	478	501	864	441	364	435	416	575	782	672	539	530	658	772	650	550	92	420	873	302	4278	542	291	277	560	297	330	474	406	284	1068	839	3439	3038	456
1134	-48	-26	-77	-132	7	-129	-11	-205	-21	-56	-11	-63	-42	-92	-39	-18	-37	21	9	-22	-57	-75	-64	-121	-37	-56	-156	96	-19	-110	4	-35	-112	-29	21	-19	8	7	-57	-5	-41	-65	-11	-6	-102	-95	-22	-92	-113
1135	166	278	451	416	503	90	184	142	414	225	257	107	432	714	635	472	655	332	267	788	903	139	117	523	150	197	170	86	366	113	390	497	168	424	206	210	178	49	133	154	139	437	445	203	174	121	101	291	60
1136	-721	-96	-837	-773	-369	-8	120	-2	-784	-14	-506	56	15	-574	247	-418	-1395	-368	-728	302	331	-396	-634	420	-512	-353	-1617	345	-723	-109	-386	-795	-1364	-380	-254	-235	-179	-197	-680	97	126	-978	307	-365	-139	-448	-416	-456	-1101
1137	-3	-121	-17	-199	-91	78	-173	-292	-7	-64	-22	-15	-91	-106	-23	10	-75	4	-111	-34	6	-68	-53	20	-12	-19	-31	-4	-150	-16	-92	-40	-99	4	442	25	-24	44	-18	46	58	67	68	-31	-24	185	-17	-34	-117
1138	174	-105	98	83	111	-85	-42	-74	67	16	77	152	73	87	73	52	-16	-17	55	-2	139	78	18	215	70	181	-125	7	23	211	48	77	-166	42	1759	72	32	44	-41	272	170	381	91	151	179	790	462	83	40
1139	-61	-172	-152	1	-110	81	120	-457	111	-136	-62	-25	-31	-92	-81	-137	-164	15	-111	-90	77	-53	-68	-128	-54	-107	-15	38	-348	-291	-159	-244	-31	-175	-235	-131	-188	2	-146	-114	-81	-103	-82	-80	-289	-95	-198	-174	-137
1140	74	52	75	54	24	0	8	37	45	37	22	37	46	89	50	63	51	66	-4	50	22	73	7	89	5	37	40	45	89	1	54	49	-24	25	33	32	58	-14	-57	48	43	53	42	0	0	-18	2	74	76
1141	-25	-58	-131	-127	-88	-51	-82	-62	62	-103	-102	-28	-28	-22	-57	-53	-92	-84	-62	-40	-44	-20	1	-67	-10	-21	57	-82	-17	-78	-65	-21	-91	12	-38	-169	-143	-43	-54	-22	-46	-5	-24	-12	-72	-54	-94	-25	31
1142	-230	-101	-559	130	-209	7	18	-83	26	-305	16	-181	-103	28	-172	-193	-353	-70	-130	-185	137	-64	49	126	-132	-30	-388	-101	51	-207	-14	-194	-166	-20	-14	295	252	138	-83	-222	-67	-226	-147	-58	-379	0	-271	-204	4
1143	90	-67	106	-131	5	26	28	-136	69	-47	-52	-35	-41	74	-86	-83	-7	42	-7	-148	67	-2	68	-48	36	-42	20	-38	64	-48	-60	-89	-170	-59	-293	-23	-274	-20	13	-66	10	-98	-6	-109	-22	36	114	92	48
1144	610	927	1697	425	529	1682	386	629	2760	1722	1587	169	719	859	661	1034	447	252	1041	1717	604	304	397	642	295	1122	209	786	994	233	510	598	861	615	853	773	382	443	344	1164	894	1226	765	519	421	1359	739	206	-16
1145	2004	1170	2572	1328	1578	978	1344	1536	2338	1681	1408	1110	1938	1745	1555	1576	2011	1582	1293	2808	1021	1109	689	2374	1577	1396	1583	1187	1278	1024	1655	3326	2307	1318	1156	1357	1169	1006	835	890	1103	2166	1416	764	1048	1604	1634	1599	1406
1146	511	228	257	114	48	56	-5	947	64	148	106	352	282	2	-58	263	21	153	740	580	178	1068	220	-216	680	939	181	1853	149	887	241	1223	-2	4	1660	1722	183	509	262	485	465	-81	232	21	32	579	1380	138	86
1147	1286	824	890	1447	879	780	1530	1095	852	636	712	676	1180	1018	490	894	966	699	746	1680	482	795	822	1137	981	742	909	1165	475	938	966	854	1276	1020	560	643	445	756	665	802	729	1233	1043	407	1013	1004	663	1508	805
1148	93	0	-54	4	-44	83	-82	-2	-78	-49	-31	84	-82	23	-85	-15	31	-36	-53	-115	66	-36	-89	-97	39	-8	179	-43	-114	-87	-90	-5	-39	-134	-76	-2	-55	-18	27	-83	-35	-79	-129	-84	-119	41	-20	-124	-72
1149	58	-8	101	148	30	39	57	140	27	84	71	20	17	43	-12	27	-31	16	23	0	-8	73	-18	101	86	83	-73	-7	13	48	16	40	146	32	117	-136	-138	36	-7	59	43	39	39	21	-9	131	-50	88	69
1150	-48	237	-213	-225	112	-348	-75	-136	196	-112	-80	-119	47	0	164	-87	-90	-182	-119	142	11	11	-26	106	-5	-245	-363	-345	-180	44	-14	51	-529	54	-103	-26	-218	99	-85	-91	-34	40	-151	-6	-199	-146	-45	-171	-189
1151	-82	-1	-90	10	-5	-101	-16	-220	-4	12	-22	-58	115	0	-19	18	117	2	19	103	-103	-86	-15	130	-33	45	150	-132	-364	41	-6	139	11	-200	-112	60	140	-1	-142	50	75	158	89	84	4	-77	-221	-46	-52
1152	210	184	273	460	78	481	556	451	334	381	277	228	144	373	42	368	541	175	443	439	217	132	267	156	268	346	882	103	680	1189	233	292	492	261	574	383	171	187	211	79	163	226	139	107	322	545	409	411	1033
1153	182	48	237	195	74	192	124	241	209	15	112	113	80	136	65	91	240	154	141	105	128	134	151	88	76	139	90	26	181	200	84	126	180	184	1535	146	176	77	137	136	233	239	187	94	214	463	-25	88	139
1154	2561	2805	5729	2247	3347	3919	1181	941	5284	2032	2906	833	6606	2321	6214	1518	6945	4263	1878	1969	-66	959	3522	3144	1387	923	1905	3394	361	3893	2410	5645	2785	3495	4759	6935	4394	1689	1147	602	1809	3462	2762	196	2396	4202	2353	306	875
1155	128	100	142	220	167	32	141	86	109	66	0	41	198	133	185	74	202	91	64	126	26	83	32	240	65	114	158	202	127	76	8	204	148	76	112	148	197	2	94	144	70	193	175	39	197	123	91	10	36
1156	398	398	601	459	478	378	341	389	382	365	293	217	421	382	318	305	353	331	335	430	283	445	210	532	511	387	344	564	455	235	407	384	561	236	281	54	180	333	139	378	437	312	374	365	339	401	383	442	406
1157	158	1187	339	353	508	823	70	476	691	306	82	132	138	720	277	181	350	141	197	111	61	139	75	339	97	278	550	289	106	344	205	56	393	62	639	117	61	67	126	245	319	462	209	2092	619	329	185	644	245
1158	-26	79	6	-47	-5	-7	-21	70	29	-27	-31	7	37	-31	-25	19	152	15	16	-13	106	24	-5	-18	-67	4	-45	4	-58	-73	-44	-15	145	-32	26	-102	-74	59	58	-32	-55	-7	-11	-31	-34	-18	-104	14	60
1159	3172	5	36	40	250	3	100	-56	-83	79	58	54	4554	-31	2315	445	157	-29	831	7533	122	1813	-9	924	222	375	42	946	-98	3943	-67	4399	311	136	788	2758	2346	2245	301	632	2983	35	1960	-28	416	6074	1764	22	45
1160	8	-26	72	99	69	136	100	-82	0	36	-32	8	16	28	7	17	-10	97	-56	8	-52	71	138	18	137	32	89	183	106	26	92	17	81	-65	122	-72	37	134	64	25	97	26	-15	42	47	-2	0	-67	-4
1161	238	51	143	149	126	142	151	4	123	173	73	50	109	37	11	130	440	115	137	100	56	167	157	53	72	41	59	178	115	33	157	195	95	-65	2	-13	-109	-2	151	44	131	61	-6	8	42	298	99	252	48
1162	26	-12	-31	41	-33	-16	-72	26	-10	38	3	40	17	42	-6	-72	5	-33	-7	52	46	-56	-53	-61	-73	-39	23	111	-103	2	-94	-19	-78	-32	84	13	-14	5	10	-16	-42	58	-26	-36	37	-87	-15	-59	-31
1163	231	-116	223	233	46	138	468	257	216	84	245	119	-67	241	-23	57	-131	1	-73	-109	151	-10	197	215	135	7	-148	125	187	192	273	-4	-259	18	55	186	208	177	397	33	-150	-5	-22	39	-2	-15	170	10	307
1164	-67	-8	2	8	-19	-26	-16	8	-105	-16	-79	15	-49	-42	15	-25	-61	-42	-41	-31	-59	-51	-70	21	-31	0	-89	-31	-13	-15	-77	-64	-131	-56	36	19	0	-23	-52	-22	-17	-28	-34	-44	-7	-87	2	-33	40
1165	-1	-43	59	30	17	1	-70	-19	-28	95	1248	58	0	1031	0	56	196	22	32	-13	52	43	117	153	82	-21	-6	135	-4	110	147	50	199	78	117	56	87	-7	21	153	89	38	174	99	22	56	-30	82	14
1166	2070	1030	1676	1741	2203	617	2664	1958	1067	870	840	342	2081	2552	1912	1026	2393	1306	907	5302	515	2133	459	2565	1417	1211	1605	1293	1415	2685	1382	3350	1236	1482	1797	794	1367	970	768	674	1121	2319	3348	434	973	1359	1601	2017	829
1167	102	-48	-51	342	8	80	-52	275	-54	83	6	89	3	76	-71	-173	-74	-81	-316	-262	142	37	117	145	53	74	-45	0	616	-541	-159	96	-176	-78	-134	8	-174	64	-211	-263	-10	-272	-60	-130	-294	-5	-122	374	346
1168	-194	23	-222	28	-78	37	5	-82	-121	-150	-122	79	-125	43	-39	-115	-98	-123	-91	-130	-21	-235	104	-147	-35	-16	61	-251	108	-80	-117	-98	69	-46	-31	-121	66	-85	-29	-91	-70	44	-102	-4	-119	-43	-78	30	-134
1169	368	179	307	121	358	216	188	214	245	207	116	148	381	359	253	158	283	169	116	91	284	241	345	261	49	202	71	120	294	255	359	369	680	34	146	115	216	77	180	166	315	228	404	306	62	175	40	221	283
1170	141	93	230	111	28	81	206	395	-61	130	-91	58	78	367	90	124	193	273	63	167	-213	6	53	146	-30	17	517	144	185	323	-222	84	623	86	105	-69	-324	119	120	-40	161	57	102	-277	342	-12	259	-344	206
1171	582	486	640	807	675	423	818	809	712	760	693	596	523	742	558	429	425	554	883	936	874	920	632	638	688	443	489	342	639	2358	697	798	588	538	1418	382	352	262	508	633	799	509	887	441	277	643	439	714	819
1172	260	187	218	93	206	183	161	61	335	15	86	109	41	-337	76	65	-65	140	95	309	-152	-88	136	139	-66	220	40	48	61	163	-44	132	66	167	211	99	-197	-51	83	117	93	134	249	141	-104	61	124	-79	9
1173	571	429	635	200	449	154	349	335	297	419	400	231	323	375	287	348	472	305	282	512	229	334	408	512	427	261	536	444	169	221	624	161	443	245	432	211	287	254	180	320	422	347	469	321	324	545	78	234	81
1174	902	1275	921	1117	1022	572	1278	832	1428	1625	1740	1478	431	1277	529	1127	654	410	1343	3026	3523	439	583	388	1783	1395	1502	456	540	717	1048	1770	1044	1119	540	969	1378	716	1447	2291	693	1199	1654	839	1305	1004	488	973	1293
1175	14	548	13	105	-130	128	436	52	104	263	-281	221	-104	203	52	169	159	147	231	-34	-138	211	273	184	237	-48	12	-197	95	-203	98	213	330	206	105	96	317	33	171	155	-53	-68	-225	145	124	-61	134	-78	-79
1176	1301	3048	2624	1647	2305	1538	1997	649	2754	3363	2490	1227	1115	3110	1828	1592	2849	5325	1119	3414	1124	724	1909	1797	1361	1689	2437	1590	812	936	876	1421	2017	1967	1608	1528	1296	1614	2021	1620	1075	2600	1878	1289	3445	2196	1741	2130	1291
1177	90	77	215	88	72	199	245	521	53	199	121	215	159	43	245	351	251	324	5	321	264	290	-36	381	265	298	303	236	187	331	56	127	-68	148	-45	222	313	90	239	271	283	216	154	39	324	355	221	212	127
1178	227	317	412	186	155	417	194	269	815	572	865	219	419	179	152	191	430	165	316	173	83	198	189	458	235	678	106	98	292	255	409	228	-12	164	79	94	272	171	167	520	571	125	256	547	204	254	160	200	79
1179	70	-51	99	-40	-92	35	136	59	28	43	-82	70	-22	5	-109	-62	9	-20	19	30	-31	37	41	-128	9	-71	219	-9	-39	-17	-56	-98	79	-43	-170	29	-31	-1	43	10	-9	91	-30	-31	82	-149	30	-32	-2
1180	559	350	683	498	322	336	258	689	599	189	424	310	427	494	361	242	205	332	363	316	269	585	286	525	391	421	10	519	462	467	441	495	200	84	442	4	102	200	38	308	353	301	491	317	142	432	210	594	214
1181	227	259	456	320	116	142	305	452	253	193	178	208	16	105	154	224	456	123	91	66	162	200	355	205	186	160	361	400	264	128	195	93	151	234	199	114	61	93	185	80	102	233	93	128	142	414	208	199	341
1182	-17	129	36	103	44	-53	-23	-40	-101	21	27	43	34	44	93	31	95	24	-19	188	97	167	-121	233	32	26	4	-24	127	-42	-2	59	94	59	0	16	-2	8	-9	6	2	30	1	-25	-9	95	61	36	-12
1183	0	385	839	-159	110	455	-144	-397	671	-134	374	-150	-41	116	-93	-176	284	-100	-32	309	219	77	45	-107	-66	-217	-98	161	-156	-270	138	-114	-199	-133	-259	-77	-80	-125	-29	83	-3	-29	216	149	-117	15	-68	-63	-33
1184	83	-129	367	-206	-48	-19	-80	-370	-293	-124	-20	-21	-73	-213	-63	-193	-764	-190	194	-74	172	286	-20	106	-15	-150	-35	222	-209	-182	56	-59	206	-20	-132	-38	-71	-79	-55	-135	-130	-161	204	175	-42	-51	139	-172	-110
1185	-39	-54	-28	31	488	49	13	73	140	21	50	51	-4	-20	23	28	79	26	-13	121	36	31	89	83	-23	28	128	142	-21	141	88	31	7	-20	1091	59	42	51	126	-16	47	79	-44	-9	768	342	172	188	14
1186	31	-32	-62	-105	23	-5	-58	-175	-34	-28	-82	17	0	-45	-11	-93	-66	-10	-13	45	-93	-35	-22	-35	-70	-38	3	111	-33	55	27	-15	-99	36	-31	29	-38	47	-116	18	-6	-16	25	29	-7	33	-17	-40	-79
1187	108	-249	520	-268	134	60	374	-58	-94	-101	1	-70	250	-124	168	38	319	125	-97	-96	44	19	-132	257	586	81	366	395	305	217	252	32	548	-23	-115	180	-176	-20	225	95	197	47	166	24	172	172	-33	-115	307
1188	822	1263	1467	1324	1955	1111	1073	797	2094	1323	1828	662	1959	1159	1831	1340	1141	913	711	3113	2703	1008	1284	1107	694	1104	801	873	676	1487	872	2654	688	1532	752	1549	1023	990	969	825	1194	2613	2307	1610	1021	290	925	1212	851
1189	10	19	1	14	90	-32	62	4	-13	49	24	-56	46	47	86	30	112	54	-32	33	-12	-43	18	42	-84	63	62	-231	42	-13	69	143	24	87	-40	-22	-81	-34	1	24	25	143	94	-38	82	30	-30	-43	-26
1190	-78	125	-74	-599	-217	99	-374	-479	-237	38	-320	96	157	-300	126	-252	-298	-78	-41	58	-12	333	-93	-244	-12	-126	59	572	-133	286	6	-222	115	-220	-319	35	-324	-95	-156	154	-86	-131	88	5	29	51	-78	14	122
1191	-58	26	106	-90	-6	26	-5	-16	-56	39	12	-12	24	20	6	21	-64	72	58	30	82	24	-18	-1	-27	-49	187	-115	187	58	-2	69	-66	12	103	-54	-64	-28	-44	45	-9	56	-56	-9	-24	-30	-22	107	7
1192	120	115	149	-10	-17	204	228	124	9	140	204	86	59	-15	28	134	124	116	-6	94	104	57	113	125	30	29	239	243	103	91	77	87	292	14	0	-2	3	109	18	146	145	58	-18	92	99	95	73	85	127
1193	73	-340	-179	218	-580	-142	5	244	387	18	-40	212	-386	127	-125	5	-68	-347	-93	-300	-71	-95	-226	53	-523	-575	209	-642	-46	-183	-12	26	843	-37	221	-85	-262	1	176	23	-571	-266	-567	-123	-42	172	45	161	603
1194	29	82	199	39	116	69	110	88	84	59	66	0	94	57	148	70	29	117	107	220	39	78	13	95	60	93	-82	125	83	76	161	81	141	118	67	-28	-106	51	68	76	65	-12	129	59	104	149	63	90	-4
1195	50	113	161	-19	181	88	45	139	153	119	-13	-60	59	18	47	-30	27	47	-79	638	559	5397	-37	56	152	144	129	53	-60	121	226	64	232	-322	31	-1057	-1938	103	-29	64	-135	80	73	99	24	262	66	73	28
1196	-76	-32	-15	-54	-60	-96	-110	-119	-45	-37	-12	-43	-59	-32	-19	-60	-124	-15	-371	-59	-81	-66	-28	-7	12	-20	7	-26	-155	-6	-174	-104	-9	-76	-7	-606	-1276	23	-91	-73	-95	-78	-80	-88	-84	25	-43	-106	-81
1197	1684	2197	2683	1195	2127	1481	1409	1007	2906	1642	2994	993	2047	1585	1965	1685	1650	489	1160	2989	3574	1381	1943	2322	1041	1500	1031	2853	497	1775	1180	2585	1859	1388	1132	2220	1090	1324	1270	2196	3155	2749	2643	2173	1016	1114	851	1221	800
1198	648	327	825	349	355	282	431	535	517	491	293	284	313	622	211	366	357	394	292	455	839	435	353	403	500	466	430	400	718	279	392	618	686	306	262	314	77	50	244	411	386	432	365	406	514	669	287	631	685
1199	-796	-970	-2111	-1555	-331	-1257	-1487	-2470	-687	-206	-1082	-791	-303	-587	-557	-943	0	-357	-208	-889	-749	-404	-1183	-952	-539	-857	-2484	-354	-480	-459	-273	-328	-2067	-665	-396	-655	-185	36	-762	-454	-351	-997	-637	-399	-783	-216	-312	-62	-413
1200	-10	175	635	-154	352	732	-208	371	1209	317	789	-155	204	252	868	778	740	152	343	1713	604	-19	294	81	-98	416	-347	-210	603	472	384	507	-406	699	14	750	437	529	417	160	205	856	343	1047	981	244	516	-1	278
1201	3	66	15	24	87	46	30	86	23	43	103	31	85	47	69	91	53	52	94	250	103	28	7	67	51	83	53	43	35	20	60	261	61	72	-50	8	-46	-4	47	105	157	81	142	102	39	25	43	59	12
1202	104	158	15	182	88	149	82	76	49	128	-56	67	6	139	116	66	177	5	58	109	32	-13	64	102	132	85	90	38	308	145	84	139	206	56	67	69	74	66	17	67	18	89	114	103	177	144	-22	187	9
1203	370	125	390	598	124	307	670	-205	539	167	249	8	539	216	226	478	367	52	75	885	653	51	357	804	-124	211	212	318	273	298	384	679	198	228	139	63	291	498	77	84	170	541	597	451	107	396	-43	405	290
1204	-588	-459	-728	-553	-255	-579	-662	-688	-571	-320	-434	-469	-387	-557	-217	-401	-748	-333	-328	-449	-321	-519	-518	-573	-405	-397	-877	-398	-644	-237	-262	-427	-1165	-327	-298	-343	-400	-291	-400	-376	-385	-501	-434	-250	-337	-713	-345	-752	-615
1205	419	291	432	517	95	497	435	731	511	143	285	422	71	335	227	195	342	187	138	132	196	357	353	279	165	172	267	453	401	99	134	121	256	190	370	238	238	358	358	26	118	101	47	44	222	95	238	224	254
1206	-379	-394	-313	-273	63	-339	-176	-268	-496	-193	-185	-293	-87	-250	-42	-223	-216	-206	-173	-458	-93	-198	-229	-79	-141	-220	-580	-333	-368	-145	92	-252	-662	-189	-192	-85	-240	-116	-163	-129	-186	-333	-5	-233	-297	-257	-104	-197	-262
1207	545	2959	2458	608	461	2075	488	1009	2379	1608	1834	586	610	2439	864	1415	2068	452	497	2009	1044	805	1916	545	1051	777	464	799	308	365	617	653	1102	558	550	723	436	407	737	1115	685	1007	826	976	589	1104	218	450	360
1208	-234	-65	-423	-408	-15	-8	-404	-698	-398	-196	-186	314	-225	-36	60	-228	-292	51	-19	-238	24	-32	-256	-257	160	-170	-539	-415	-572	-80	-98	-258	-433	72	-57	-32	-545	121	145	-57	126	-149	-153	111	-279	-283	48	64	-226
1209	82	7	246	66	341	8	171	137	113	222	294	66	265	86	335	339	205	155	141	644	226	241	91	219	158	242	206	152	124	132	237	130	180	453	235	14	139	171	159	143	230	347	253	267	0	177	55	121	218
1210	-136	-259	-581	-303	-496	-24	-349	-721	-204	-155	-140	-235	-303	-471	-237	-398	-342	-385	-334	-443	-92	-48	-269	-503	-82	-343	-472	-511	-367	-258	-60	-234	-458	-286	14	-186	-273	-177	-303	-142	-359	-211	-276	-287	-59	-327	38	-470	-122
1211	340	315	548	245	51	490	576	637	232	60	253	139	93	27	176	130	142	111	90	33	301	194	362	113	264	110	76	217	629	44	176	147	69	159	165	126	42	194	301	93	55	42	43	87	172	69	81	129	235
1212	-145	-213	-261	-182	-111	-108	-149	-82	-111	-71	-115	-40	-210	-188	-129	-133	-399	-104	-203	-237	-354	-163	-180	-194	-113	-242	-369	-267	-133	-197	6	-163	-307	-56	-127	-413	-412	-43	-81	-78	-134	-137	-141	-102	-147	-249	-15	-182	-170
1213	134	157	247	264	103	71	290	77	194	201	73	71	98	76	97	210	310	130	53	163	84	128	201	4	109	22	370	-74	335	158	241	136	453	93	-74	-148	-210	-7	-46	34	123	21	52	-2	177	84	86	135	216
1214	-76	-29	-29	85	-51	-28	62	-38	-49	-43	-39	-12	-95	-29	-13	-34	8	9	-18	-13	-43	-30	-79	-5	18	-5	-81	-77	-23	-2	-18	-38	-29	-34	7	-13	-2	-2	-15	-28	3	-16	-35	0	-54	-77	50	-1	-4
1215	-516	-320	-717	-498	-399	-401	-488	-457	-654	-474	-447	-169	-370	-502	-299	-474	-546	-414	-232	-286	-21	-499	-454	-603	-231	-398	-485	-321	-573	-244	-233	-504	-522	-291	-153	-357	-336	-129	-368	-129	-335	-183	71	-182	-332	-373	-358	-801	-750
1216	296	397	672	587	299	647	525	548	708	510	334	172	221	421	398	292	226	83	430	269	71	353	457	145	234	180	381	543	298	327	147	317	753	167	170	94	251	194	38	533	263	218	453	40	267	244	210	542	307
1217	850	701	1581	1359	2088	958	846	602	2057	1225	1074	702	2174	1135	1894	2687	1321	1391	3571	2464	5022	835	1257	1189	1032	1981	2899	569	1064	840	1803	2476	2985	958	992	1160	1056	668	1769	538	681	2244	1576	1165	731	679	665	1088	625
1218	-243	-16	-120	-234	-112	-19	-132	-130	-86	-129	-102	-113	-116	-202	-84	-172	-109	-128	-114	-185	-157	-48	-98	-220	-86	-233	-137	-60	-206	-96	-166	-190	-98	-79	-132	-42	-53	20	-43	-17	-250	-96	-68	-119	-84	-100	-73	-120	-158
1219	-1410	-1235	-2135	-1737	-740	-1353	-1581	-1578	-1661	-1248	-661	-893	-840	-1253	-402	-1211	-825	-657	-1292	-718	-579	-1190	-900	-1084	-489	-703	-2307	-1040	-953	-1460	-712	-868	-2099	-1058	-886	-507	-773	-745	-637	-666	-833	-609	-740	-501	-1145	-718	-892	-1576	-911
1220	8	-182	-288	-151	-30	-184	-191	97	-121	-123	-235	25	502	22	391	33	-310	173	154	609	-182	78	-144	9	316	75	-291	-26	159	-23	147	636	64	-36	185	290	166	183	-61	95	47	-199	168	-66	-89	87	421	-64	-81
1221	-819	-1487	-821	-309	242	-279	-756	-2084	-698	-262	-494	-1155	-535	-1098	43	-398	-779	-166	-641	-107	-61	-1171	-756	-649	-346	-525	-258	-137	-563	-806	-485	-838	-350	-381	-552	-447	-291	-8	-310	-296	-295	-25	-143	-470	-74	-180	-231	-1419	-743
1222	20764	17636	23324	21733	20332	32791	33797	24655	18208	26774	22297	30546	23104	18283	18949	23166	19482	24312	24377	9995	24322	28109	34139	21817	24538	20358	31261	36200	28622	28380	37774	15390	29500	31076	36329	29313	22116	29051	31530	23802	27087	19932	17049	27923	44125	38545	36150	21029	37884
1223	9324	11126	7629	10999	13543	9241	12210	5880	12629	12481	9711	11213	10858	12182	11638	10669	8666	13789	11866	11470	18006	7803	8551	11733	11813	11113	8194	5175	11659	9357	12156	10879	7507	14993	10811	7234	12188	12674	12417	12998	9548	13356	12173	14236	19612	11994	8121	13322	11994
1224	12	133	-45	244	98	-42	20	55	-49	-44	8	232	93	131	146	26	-15	351	167	-35	-51	-62	-62	231	572	165	-10	43	102	190	-191	78	59	106	7	-66	2	59	129	385	281	343	654	27	27	-23	-83	-11	19
1225	-399	-59	0	-603	611	-695	-761	-686	112	-15	89	-477	71	-209	431	253	-213	-60	366	823	1118	-226	-644	420	-149	311	-982	-183	-288	-255	287	176	-81	162	605	696	-168	-27	-167	38	-45	745	134	250	-302	-298	-20	-265	-165
1226	-883	-323	-696	-575	-284	-794	-1265	-1284	-737	-392	-486	-530	-293	-604	-414	-339	-437	-363	-356	-461	-301	-748	-509	-627	-305	-570	-910	-519	-977	-541	-300	-376	-877	-468	-499	-536	-387	-401	-638	-250	-321	-318	-279	-162	-584	-798	-546	-878	-673
1227	309	158	261	442	443	254	325	286	241	237	165	173	201	422	328	435	321	408	237	518	193	112	269	490	312	264	444	436	360	226	195	469	492	231	163	188	151	261	122	177	215	406	225	162	364	365	172	129	211
1228	-80	285	175	-52	97	46	30	-55	83	-24	130	83	87	398	148	100	59	17	50	679	-4	236	20	67	203	98	-86	26	-229	294	178	227	-69	54	-36	13	-20	70	-194	94	89	73	263	111	82	79	114	-12	168
1229	8	9	37	55	43	62	120	23	-6	35	-1	34	33	-4	14	58	9	80	16	51	-39	20	-13	54	-1	2	78	50	-35	19	37	85	112	37	14	-22	-14	-5	52	40	25	28	-10	50	24	69	91	37	45
1230	74	185	408	241	161	224	112	131	430	345	249	152	273	317	288	146	282	195	165	612	527	14	226	312	203	190	345	111	311	311	311	568	276	428	225	289	344	213	140	97	62	357	261	215	229	180	271	197	86
1231	210	80	156	249	230	131	137	116	37	60	109	-15	101	133	552	85	-37	127	79	30	198	95	144	224	99	127	107	299	61	4	50	69	145	433	197	274	-69	85	12	-40	17	168	3	-29	37	23	86	74	168
1232	-572	-374	-804	-646	-177	-563	-873	-1077	-382	-225	-387	-639	-261	-325	-201	-328	-317	-273	-329	-273	-271	-631	-463	-476	-331	-243	-666	-342	-912	-279	-208	-397	-1029	-311	-521	-200	-488	-288	-270	-280	-273	-215	-204	-249	-454	-489	-259	-592	-651
1233	61	91	198	107	170	120	18	176	250	24	130	70	170	159	170	91	379	118	50	79	66	53	302	159	50	95	106	9	8	49	35	133	119	90	79	57	80	49	74	25	53	117	48	31	87	87	86	76	146
1234	215	294	9	193	405	192	329	280	161	224	381	212	558	529	393	311	481	543	249	757	128	153	326	538	238	271	353	545	585	293	355	432	609	117	74	256	361	245	154	150	186	242	339	155	421	651	231	363	281
1235	104	28	39	-5	65	49	147	67	60	6	40	102	10	119	48	68	17	62	34	9	-14	81	26	45	83	-43	165	65	232	29	90	62	48	56	60	91	38	66	78	43	29	-5	31	36	24	-33	76	115	-9
1236	-520	-318	-854	-322	-1	-147	-596	-358	-352	-85	-98	-117	73	-232	86	154	-637	-98	-104	237	2	-524	-176	-514	-603	-45	-375	-671	-190	142	-140	-1	-985	23	-362	-478	-83	-252	-573	-22	-463	61	191	-148	-152	-468	302	-396	-360
1237	64	-16	-191	-70	-7	1	-70	73	-25	37	-6	35	4	57	61	126	-30	-15	-46	-53	-7	10	-15	-79	16	12	51	-89	-14	-94	-113	-22	-55	-10	-93	103	44	10	-24	-47	46	20	-9	46	-74	-100	-15	-5	9
1238	52	62	-157	368	995	8	937	-229	209	-349	-4	-45	1110	231	1202	376	95	111	-16	1330	103	51	144	1498	-94	773	-281	-31	320	-85	378	1068	21	745	62	180	293	547	32	7	-89	2269	1081	-73	426	59	43	106	110
1239	3586	4802	5153	3301	4524	3378	2629	2287	4423	4220	3408	2021	5470	3623	7313	3746	5103	1752	4003	8242	1544	1743	2669	4011	4293	4515	2326	5453	2295	4595	3992	5709	4027	2917	1776	4192	3673	2515	2134	4550	4345	6682	6179	4010	2673	2420	2724	1751	1928
1240	-274	-467	-171	-440	-336	-110	-30	233	-309	-39	-86	-517	-252	-312	-234	304	152	-185	-62	-736	38	-223	1	-151	38	-467	-740	-345	-33	-572	-193	-84	-287	-352	-423	-4	-289	140	-261	-260	-449	-183	-483	-145	-172	-164	-805	-15	-336
1241	481	361	751	687	834	394	389	448	874	436	578	166	514	674	589	629	483	353	340	1421	624	347	381	683	247	448	497	210	497	290	302	584	678	521	60	130	119	142	284	474	666	1108	766	324	376	198	218	260	139
1242	397	314	306	284	145	222	452	352	338	176	228	165	188	292	221	307	216	68	214	158	112	164	305	275	331	115	131	212	291	-53	-42	158	331	216	266	397	197	160	165	144	143	160	131	262	97	224	122	251	293
1243	24	65	107	-34	51	3	-48	0	0	30	4	-10	2	35	10	31	176	40	-146	-20	-44	79	-110	-26	14	52	132	-31	-20	-105	-94	-4	108	14	-31	26	-15	-10	-12	-20	25	58	-25	5	102	-12	48	39	57
1244	10	18	67	17	22	28	-6	-13	-8	1	21	31	2	-14	0	-8	1	-14	-6	26	9	-14	-11	25	-4	-13	61	21	8	-4	-25	5	-5	-4	-28	13	31	18	1	-25	-9	12	23	-10	-9	87	25	-7	-16
1245	179	51	234	424	628	-32	384	154	204	-8	-11	60	319	73	525	520	335	742	277	1127	777	11	100	507	-3	54	420	-101	165	33	401	843	1	364	276	99	-38	226	111	1	143	847	459	47	197	33	294	191	69
1246	1361	2148	907	1392	2016	357	527	511	655	390	338	544	1347	580	1794	756	931	307	654	3039	438	410	294	1408	1972	347	-237	1272	200	724	806	3414	189	959	995	1042	1372	980	448	1857	1723	1620	1601	795	279	239	518	497	247
1247	-110	18	-192	-88	30	-49	-82	-58	-111	-61	-92	-97	-46	-45	11	-81	45	45	-2	-42	-104	-141	-193	9	-42	-52	-12	-96	-181	-37	-23	-80	-82	-57	-98	-25	6	-12	-44	120	15	8	55	-68	-54	-30	-22	-86	-14
1248	984	947	1325	823	625	821	1082	1003	981	671	663	655	539	723	608	755	846	2272	567	938	550	685	729	741	756	626	1201	939	585	743	531	692	1473	582	545	618	507	425	573	665	839	576	759	576	506	636	577	751	687
1249	543	2972	485	740	2453	375	961	404	783	1288	733	2095	1405	742	1718	623	1016	1198	1010	1969	1377	791	596	868	635	827	190	1018	128	1726	1092	1415	521	961	612	554	3889	1524	2111	3808	1976	4178	2570	3570	319	167	424	3127	853
1250	-18	23	-150	-82	-41	-140	-63	-110	-87	-39	-67	-60	-11	-49	-54	-75	-107	-32	485	-10	74	-48	11	-90	-97	-39	-81	-74	-42	-77	-58	-126	-139	176	57	-47	-23	23	-68	-20	-65	4	-95	12	2	23	73	-47	-163
1251	16	36	61	-4	20	48	-21	61	17	16	24	-12	0	7	-47	48	60	36	1	47	62	23	110	-27	30	33	75	21	106	8	44	9	-9	-4	40	87	-41	-18	0	-1	-19	6	84	10	62	36	83	51	-14
1252	-163	-12	145	-53	80	-5	10	-1	-137	177	-43	-37	8	178	-35	-22	-71	257	100	17	-56	34	77	-20	93	24	84	183	86	-102	2	45	216	-12	-233	77	88	-109	-13	153	-78	41	57	-31	107	84	27	-20	96
1253	987	1564	1617	1488	1626	821	1549	1031	2160	1111	1909	1136	1076	1177	1199	825	1013	992	658	2061	1597	1084	1046	1639	1029	1177	594	1185	961	2404	920	1519	752	829	773	871	629	554	406	1347	1126	2796	3124	716	808	574	381	1693	1654
1254	149	97	253	153	120	85	142	206	162	68	134	81	136	149	70	201	83	249	45	92	139	133	104	90	73	102	231	166	194	99	88	120	239	68	108	38	121	46	91	78	78	85	157	122	119	144	147	150	127
1255	-6	28	-61	-46	-32	-10	-65	-2	-6	-44	-50	-50	-30	-48	35	-4	-60	-17	-47	-67	-13	-19	-93	-28	-44	-53	-17	-41	-23	-11	0	-9	-96	-7	-110	-78	-110	-10	-27	-6	-1	-32	-7	-44	-24	74	40	-89	-127
1256	130	133	254	266	178	188	62	236	237	99	131	97	141	229	84	109	72	179	94	196	76	126	77	162	169	130	206	190	49	89	226	185	200	195	180	13	-71	121	88	57	142	135	233	126	114	172	50	176	165
1257	626	760	685	482	400	704	475	164	939	536	717	556	470	542	870	415	763	248	440	1492	1086	439	454	772	642	668	646	350	486	438	491	1031	853	799	665	867	710	713	628	510	451	1302	946	498	601	450	719	326	348
1258	1525	2283	1821	2829	1448	1216	1779	1334	4977	2409	3922	7639	5105	2150	1678	1800	2558	751	841	1491	544	1378	1048	2861	9016	1985	1201	519	2094	2704	2343	4695	2696	2236	1360	389	3667	2053	1927	1329	2060	6383	6589	2956	2084	1452	5348	2286	2188
1259	53	235	238	123	55	-33	84	173	169	177	81	109	215	116	137	198	512	117	103	429	287	1	96	141	170	124	122	19	446	228	46	95	494	95	72	-41	13	36	143	43	145	123	215	43	57	368	205	667	305
1260	-2	100	-5	-27	51	-19	-21	116	88	38	65	63	104	0	50	65	336	87	-1	104	117	-14	68	25	35	-14	131	43	-7	1	54	141	-4	23	-28	-11	-9	24	-1	65	166	142	88	117	-19	118	43	348	62
1261	-47	-20	-398	-121	-40	-181	-159	-55	39	-65	-134	-64	-165	-4	-108	-237	-144	11	-107	48	-27	-190	-112	-82	-58	-145	-51	-48	-106	-45	-138	-83	18	-23	14	-142	-163	106	119	47	-102	27	-6	-61	-74	-121	20	-202	-137
1262	-246	-98	-328	-260	-159	14	-292	-277	-265	18	-106	-129	-77	-122	-99	35	-123	-211	9	-211	-123	-253	-212	-25	-178	-106	-179	-50	-139	-82	-130	-136	-132	-34	-57	-254	-728	-96	-55	28	-37	-207	14	-80	-54	-87	-83	-291	-221
1263	53	56	18	40	30	-238	-15	-37	-66	50	71	-67	8	-5	93	37	56	13	14	-8	-3	-107	-30	-71	-93	35	34	-190	-112	30	75	1	-49	-123	-156	-155	-262	51	32	62	89	144	31	-36	-2	90	-73	-36	-151
1264	97	60	49	-23	66	248	129	212	107	154	36	44	25	-4	-6	36	50	57	77	61	-68	-40	98	39	33	72	82	4	86	82	-201	-3	76	-34	-19	-7	-108	5	99	32	74	6	0	-9	-27	15	50	71	62
1265	51	109	98	98	34	32	112	172	87	7	53	90	28	33	41	107	173	105	30	99	14	54	22	123	65	53	197	26	77	42	79	106	183	28	-33	118	235	0	6	22	109	154	67	-36	159	131	5	102	129
1266	1859	1631	2878	2792	3380	1566	2175	2115	5840	3033	3391	1258	3137	2494	2837	2615	6160	1922	3469	6803	5085	1552	1791	2623	2408	2228	2491	1728	2336	2621	3107	3417	2844	1956	1576	1550	1958	1494	1534	1302	2095	3965	3358	1680	1715	2152	1179	2741	2219
1267	92	60	157	70	179	58	95	-85	74	181	136	-50	136	39	190	287	255	176	32	154	58	-53	98	395	4	246	-7	113	206	16	4	109	233	78	72	37	131	20	-26	163	251	178	191	164	197	301	78	207	117
1268	536	1258	2098	254	127	1655	295	245	2951	1712	718	229	1452	1949	24	302	10	-110	992	-212	13	183	269	64	434	635	352	569	282	702	489	1084	105	14	718	1105	154	142	157	146	494	1290	7	478	-167	195	373	100	137
1269	-11	64	17	-6	1	37	85	167	13	51	10	-28	29	18	104	10	10	-36	9	31	-84	35	81	8	60	-5	-32	-79	-2	1	25	14	199	6	60	-63	48	-27	15	12	-30	53	-40	-9	54	126	106	-63	16
1270	954	472	970	805	805	480	784	874	1071	413	724	422	695	594	670	478	318	433	886	704	149	759	132	762	951	391	949	902	191	829	426	712	512	768	466	661	634	495	547	517	591	1100	1062	258	644	679	299	637	524
1271	-63	-89	-115	52	9	-7	-62	-170	-82	-44	-58	-56	12	-64	4	-57	-53	-16	-22	53	-104	-77	-146	-71	-94	-81	-186	-118	-73	-84	29	17	-176	-20	-98	-71	-105	23	26	-30	-59	-6	45	-103	-17	-66	-7	-139	-209
1272	469	-286	213	343	-3	135	131	-527	302	229	-371	73	216	-91	7	373	-126	116	1	-330	-186	-91	385	60	-52	-100	-54	265	-250	-1014	-321	-96	270	40	-1028	361	-65	-1	-143	-81	-123	-721	-216	-123	267	319	-330	413	-403
1273	-378	-224	-705	-232	-228	-129	-213	-346	-506	-76	-356	-165	-175	-269	-203	50	-237	-194	-16	-286	-81	-126	-89	-88	-121	-174	-475	-246	-339	-255	-18	-174	-388	-43	-223	83	-195	-75	20	-180	-301	-312	-208	-167	-354	-167	-119	-382	-269
1274	-13	-19	111	89	61	49	181	202	6	67	63	37	70	-18	53	-44	120	141	-4	136	37	30	66	50	64	18	223	31	367	22	52	54	279	95	146	91	2	-34	37	99	49	68	19	237	34	41	165	-54	281
1275	117	82	169	167	48	112	142	209	-76	84	2	57	68	136	43	130	15	93	72	72	-1	19	165	101	18	72	3	217	5	78	-46	35	-68	86	161	32	70	31	63	110	97	106	-40	107	152	43	83	80	48
1276	-92	139	-117	-120	-83	-103	-50	-158	-86	-35	-72	-94	23	43	-79	-49	-68	-90	82	14	-66	-130	-22	-57	-13	-94	-84	-178	-263	-52	-88	-7	-41	-75	-100	-100	-77	-49	-85	7	13	-35	-69	4	-112	-139	-81	-170	-134
1277	2794	2393	4962	2308	3514	2937	2742	2548	4845	2207	2022	2096	1862	1823	3866	1953	2225	1283	1498	4164	570	2079	1972	2411	1871	911	1383	3287	717	2752	1357	3511	2166	1836	1718	2226	2151	3358	2241	1604	1622	2558	4008	1475	1026	1333	1372	970	810
1278	-60	-35	-25	51	-207	80	38	74	0	-321	-32	-93	-124	-81	-197	-335	-230	-191	-101	-273	-224	-138	-134	-255	59	-27	-436	57	121	-145	-323	-255	126	-150	-40	-323	-234	23	43	-183	-370	-247	-237	-49	-164	-494	-119	-143	-62
1279	423	841	581	471	799	172	584	404	327	380	1078	248	754	716	677	896	445	89	701	3845	1055	714	406	1473	219	415	198	427	576	1089	853	1166	336	516	288	259	270	163	235	798	1437	1716	985	1049	157	182	406	517	221
1280	-40	4	224	31	80	80	115	20	-20	10	-4	-67	70	102	70	68	-44	-68	20	62	-44	15	-41	15	-18	5	65	-33	-55	35	-29	-38	190	28	103	37	69	8	20	-34	-58	94	105	21	82	115	-40	-150	-40
1281	-81	120	-281	-22	67	-7	-110	127	-162	-152	-47	34	-80	-58	33	-52	-68	-64	255	135	56	-26	-110	-94	227	-78	140	72	-140	324	262	385	-212	-136	495	-44	-1	-1	252	-157	-55	-13	172	81	-72	-82	-45	-54	7
1282	859	891	1248	985	956	1449	878	358	1910	1234	1463	206	531	1160	743	1327	789	1467	1186	2175	617	92	1054	735	564	987	239	989	705	876	876	1248	947	1015	1007	1111	459	850	1318	917	838	988	570	915	1345	1145	732	936	1012
1283	-359	1280	-1998	-1786	38	-558	-1179	-1521	491	-7	-501	-392	-603	-879	-503	-99	-523	-294	474	-61	-33	-1268	-1242	-343	30	-396	-132	-1530	-825	102	21	-792	-482	-608	-158	-554	60	57	623	-278	-38	-224	624	534	-476	-896	-99	-1533	-771
1284	-193	142	18	-247	-46	3	48	23	-124	68	-12	-211	38	-34	-8	-400	-16	49	23	253	139	-162	125	64	59	141	18	263	-29	6	-159	166	42	-195	-76	-26	-304	-82	-81	-72	171	156	31	47	-217	-77	-241	35	74
1285	96	161	-114	-38	150	80	53	-685	-282	236	-67	123	229	-141	13	214	-16	76	77	187	-24	85	-170	50	120	101	295	0	-335	-370	102	-294	-19	208	271	66	-100	270	306	-237	78	-34	47	53	97	272	287	115	-257
1286	1325	1266	1716	1052	847	990	1345	2034	948	1193	1139	1161	1003	414	626	1241	1836	935	1019	1411	572	1248	1155	1120	966	1235	1854	1344	1926	1046	924	1112	3042	690	661	885	1032	457	1041	712	907	1032	839	568	951	1241	782	1379	1363
1287	-82	-46	-49	-62	-2	-122	188	290	101	43	-42	-21	1	65	-21	-19	205	-40	132	-36	66	-44	-43	-30	-32	-100	84	-123	163	62	-46	94	-2	61	218	20	12	-24	-116	7	15	33	17	57	12	77	134	118	69
1288	1418	722	1150	1935	2410	946	3078	1820	960	559	750	763	1629	750	2131	1337	1512	752	929	1694	669	1050	936	3558	1114	1179	1028	1515	566	832	1286	2291	2074	1681	817	963	1568	867	733	910	905	2643	1350	733	2728	1434	803	1046	610
1289	12112	15076	11838	14972	17050	11010	9281	15556	15645	13138	14742	14089	9225	14926	15441	15276	10397	14391	10687	14550	3739	15127	13242	14585	16806	15814	11281	10206	12307	8948	8834	13261	10583	16198	10016	14610	17990	12937	12799	14332	12169	12267	14631	9118	12627	11440	7724	11740	6963
1290	33	-36	-25	-19	-64	42	42	26	37	-2	37	-10	-24	-24	34	75	-32	-49	48	-17	14	-53	41	-11	-1	23	103	-21	46	15	35	15	-66	-34	4	8	13	24	-43	4	3	-27	-37	4	-64	118	33	-27	2
1291	723	995	-203	704	1142	-17	566	506	515	-26	372	878	798	699	1179	172	1313	552	410	2225	1121	976	-41	1002	830	868	-187	287	248	1032	374	785	106	912	725	200	931	420	210	668	1675	1554	1655	1249	456	-84	587	2951	1288
1292	-93	-84	-176	-3	3	-42	28	-32	-73	-66	13	-8	-21	-39	34	-51	-132	-53	24	-70	4	-30	37	-97	-4	-37	-189	-125	13	128	-107	6	-229	43	-50	-121	-112	-40	-61	-47	-2	-40	-11	1	-132	-90	-78	-67	4
1293	137	251	222	268	120	10	327	206	227	120	149	17	158	171	97	177	113	172	-25	233	117	26	138	171	120	140	469	357	161	-74	52	154	377	109	69	7	89	25	103	19	167	235	50	-54	72	-10	53	178	199
1294	3477	3509	3291	5036	3863	1735	3810	2045	3956	1333	1654	2118	2376	3849	4086	2711	4752	2528	1972	3900	1821	1951	1210	3094	2127	1891	2746	1571	2103	1379	1987	2435	3558	2185	1285	1814	1591	1389	1568	1666	2428	3132	2568	1910	1655	1704	1601	2788	1853
1295	78	32	35	63	84	-62	-36	31	50	54	100	61	60	61	56	209	96	67	75	193	46	-45	-85	-72	82	49	37	86	35	105	-27	136	-14	6	64	40	43	51	30	72	115	40	159	51	22	146	27	12	-43
1296	1413	732	1150	1409	952	640	1371	1025	999	671	809	587	934	809	883	933	416	1347	845	1064	683	1174	889	922	1039	938	1267	1313	825	924	834	1087	1539	494	675	701	765	763	542	904	971	827	1176	794	738	1032	579	1049	1033
1297	100	80	134	71	36	62	50	103	89	41	32	31	48	89	7	79	87	20	59	39	11	73	20	69	74	58	93	98	114	34	182	110	141	59	9	50	-32	-10	41	55	110	90	79	62	-14	139	20	63	24
1298	305	373	612	326	403	145	290	263	571	160	264	146	320	354	186	278	461	144	184	658	301	115	134	323	157	115	186	86	442	352	296	433	371	131	187	97	238	140	184	117	250	438	544	182	119	54	5	291	228
1299	116	-19	116	112	10	151	181	35	136	-86	-26	79	-51	-41	-69	-71	-79	-66	-107	52	61	133	214	-170	-5	-91	-43	164	89	138	105	1	-129	86	-201	171	2	95	88	-95	-10	26	-11	-73	-137	-146	-109	-189	-110
1300	346	168	312	326	412	151	253	119	279	399	319	140	167	208	327	124	90	290	190	429	354	210	55	220	49	17	67	311	-13	35	176	332	213	217	281	523	293	232	154	124	459	612	585	286	107	74	40	232	84
1301	258	32	307	197	-19	266	156	139	202	193	85	57	25	173	79	-102	135	59	39	-63	42	68	254	-45	-111	36	486	207	229	116	94	100	465	46	88	78	148	176	69	61	46	68	-16	88	152	-12	198	160	60
1302	44	18	222	385	52	117	534	-17	-196	115	152	152	-42	78	-1	-78	212	65	88	-35	52	232	41	43	-33	38	48	115	-188	-38	323	95	85	21	14	-57	-71	80	146	162	39	25	102	-1	159	74	190	63	507
1303	1055	932	1597	256	239	142	297	853	381	138	844	421	1071	828	424	569	774	288	181	960	590	941	739	1058	263	790	1165	1549	547	702	1239	702	1393	333	271	237	201	414	250	203	786	257	881	546	704	1261	277	697	415
1304	-381	329	2281	300	-321	745	798	-469	1931	129	223	360	1672	696	943	487	292	129	614	1239	228	13	-195	225	699	542	-300	905	-857	716	-2	1242	-35	-446	-7	7	784	522	795	578	78	435	1018	3406	-743	417	1382	2222	1385
1305	185	-32	220	-63	35	-8	-129	-34	95	7	77	-79	-39	67	-90	1	-145	3	-82	-198	-387	88	45	96	47	-3	-129	67	-20	-110	94	-44	-5	-20	-81	-547	-315	36	-30	-18	57	-21	-79	-35	-39	72	-45	35	-64
1306	193	31	198	91	194	96	178	112	198	9	36	-22	170	188	217	240	254	32	200	338	119	7	85	191	14	6	79	67	216	100	176	461	119	118	84	16	86	69	117	25	1	179	91	1	-4	33	144	6	-7
1307	54	-47	19	-23	13	-42	-82	5	2	3	-7	1	-84	5	29	-33	-13	13	-118	-61	48	15	9	-5	-32	-49	1	-41	-45	30	-10	11	-105	18	24	-109	-83	-15	-3	-105	49	-36	-12	-50	-39	-77	81	-92	-48
1308	61	118	108	10	51	21	-10	-4	21	38	85	31	6	69	-1	1	101	38	37	33	-1	6	37	18	18	23	-54	-101	52	31	25	76	22	46	-185	-10	65	36	44	81	15	36	85	57	17	33	-96	62	-36
1309	23	1217	30	-13	176	-1	-179	178	98	467	71	-31	5	125	372	378	-38	109	3	617	475	785	3	-76	1133	350	272	-84	-57	59	203	3	-133	259	33	-93	377	132	97	537	183	123	2031	1569	-84	-36	-45	-14	-117
1310	478	482	637	484	251	375	537	1046	1009	234	960	152	473	411	388	436	668	529	399	1201	229	914	364	916	414	504	632	786	683	649	456	550	696	511	36	507	559	369	343	572	709	737	797	707	371	419	307	612	447
1311	307	322	515	89	14	48	327	679	228	189	255	79	-223	225	93	792	652	408	178	275	333	44	132	266	495	258	298	24	-161	406	109	262	789	57	245	-83	-92	-10	191	267	193	65	224	133	421	383	208	25	526
1312	628	658	692	289	210	254	403	769	1014	163	651	160	1084	309	357	316	1479	185	304	1964	999	513	467	668	305	328	458	258	531	423	474	998	230	324	336	508	343	47	95	561	618	2229	799	250	129	257	193	689	300
1313	22	-89	-30	20	13	-62	-38	-119	21	-10	3	24	53	8	-31	107	-88	-22	18	55	41	0	77	41	29	70	-40	-7	-7	67	-10	7	146	-18	211	23	126	-37	18	35	15	17	24	-29	29	23	30	-31	-98
1314	-1579	-518	-1862	-894	-768	-576	-1103	-1659	-1352	-804	-897	-632	-736	-1473	-771	-1224	-1438	-736	-618	-1367	-643	-1313	-965	-1312	-1439	-794	-1517	-1011	-1136	-1176	-743	-912	-1431	-471	-1153	-1030	-1088	-586	-836	-905	-813	-983	-964	-636	-696	-800	-526	-1546	-1430
1315	104	728	279	619	495	172	562	248	419	208	104	454	477	-12	518	531	689	141	696	1740	708	1199	545	498	964	419	42	-185	610	337	548	1116	606	616	1360	453	559	593	77	472	611	583	456	1013	257	623	1415	1108	781
1316	294	655	459	407	620	266	220	463	505	206	582	150	361	476	401	437	930	254	258	950	692	398	207	465	295	254	344	236	383	427	180	502	397	289	173	299	357	179	151	328	474	606	402	350	122	254	205	429	365
1317	173	193	61	140	225	40	188	55	140	-4	97	66	291	130	312	169	535	65	145	969	393	163	214	291	51	171	187	41	232	95	477	208	133	239	158	216	1	82	44	42	79	275	218	167	107	146	35	172	96
1318	451	996	731	630	836	499	438	1021	901	436	1197	354	447	772	677	869	1514	321	451	2314	660	1020	733	778	612	155	533	663	390	1220	586	791	797	879	906	843	649	541	581	860	1145	1437	948	722	294	412	193	590	492
1319	1967	1752	1827	2221	1773	1269	2796	1514	1650	808	482	1103	1830	2522	3042	2445	2945	670	3079	3939	847	831	737	2519	2118	3684	1137	2761	2933	1112	1559	1297	1739	1967	1165	2638	1676	1124	1760	1409	1194	3184	1484	1320	1452	2817	3830	3176	2592
1320	349	144	442	368	250	190	344	439	428	241	230	185	162	370	218	278	271	230	283	259	271	350	113	327	310	220	201	424	406	154	296	256	461	173	69	26	155	223	228	168	253	266	160	219	149	365	261	354	336
1321	411	855	907	521	559	149	603	1113	681	333	236	597	666	778	629	400	808	445	629	997	317	1404	315	665	476	557	384	586	464	808	544	642	767	231	324	299	310	394	400	390	505	151	312	673	259	515	129	680	750
1322	211	116	75	-79	222	23	-258	-193	197	-76	-4	-86	192	37	151	56	247	262	-32	245	473	-14	-53	-56	-66	102	522	181	180	109	147	377	501	125	122	-88	-1	129	184	99	27	507	557	98	-134	-64	-96	347	-26
1323	-393	-299	-338	-342	-270	-232	-396	-337	-365	-105	-253	-275	-302	-69	-242	-150	-485	-176	-232	-365	-4	-421	-283	-441	-406	-203	-696	-306	-221	-369	-224	-215	-598	-165	-197	-299	-252	-154	-131	-217	-318	-355	-319	-196	-277	-164	-180	-474	-329
1324	1013	494	750	824	834	608	446	392	984	596	1302	379	1202	1014	875	715	1039	708	736	1402	965	1009	849	750	441	393	278	502	614	548	590	1227	457	743	487	597	507	373	227	694	1273	1105	701	779	386	324	536	744	690
1325	54	29	290	52	9	62	43	5	45	37	33	8	-10	105	0	58	32	49	48	4	56	37	119	98	59	36	32	171	101	2	92	68	69	3	24	-157	-146	70	58	36	33	22	-22	43	49	2	50	-11	72
1326	-94	-12	-76	-99	-23	-60	-73	-44	-19	-35	-23	-81	-92	53	-25	-77	-30	-5	-44	-8	-53	-14	-20	-101	-83	-31	-100	-144	-46	-4	-27	-29	-72	39	-72	-41	-24	2	-85	-73	-81	52	-39	-62	-62	-43	-2	-54	-93
1327	734	229	507	130	-116	-88	94	88	711	353	180	-54	240	382	-11	-177	505	402	-2	647	-54	754	30	-598	-234	432	-206	101	-693	241	199	313	401	184	-43	8	-670	265	57	-42	502	32	-155	96	104	-252	-7	-126	-685
1328	-473	-168	-354	-214	137	-261	-383	-745	90	-71	-129	-215	-174	-103	-138	-147	-350	78	-66	-81	-123	-111	-169	-379	-122	-208	-719	-514	98	-199	-63	-55	-250	-147	-341	-42	43	-151	-35	-284	-379	63	-152	-21	-154	-43	-190	-372	-278
1329	453	314	387	328	-197	592	280	793	839	556	567	511	225	263	151	225	802	510	339	1130	610	704	625	751	783	339	621	898	670	788	443	781	992	563	648	335	117	451	708	464	175	331	123	393	629	548	355	820	663
1330	88	180	42	205	44	160	241	133	198	113	42	183	156	113	139	151	304	26	69	253	203	163	193	197	117	182	550	84	45	313	130	233	229	540	137	108	261	88	91	201	193	231	328	138	147	154	73	-3	-28
1331	337	343	476	216	84	220	285	392	358	262	186	209	261	374	211	388	196	57	202	251	253	109	208	276	124	310	485	439	204	204	250	294	391	375	293	216	313	205	269	313	283	346	487	188	274	198	104	337	536
1332	3359	3301	4341	3046	2071	4516	2688	2530	3607	2296	2512	3842	1842	2151	2961	1955	1586	2155	2307	3458	2803	3635	3835	1960	2471	1950	5216	2276	2932	3112	2446	2648	4390	1782	3545	1992	2850	3023	2696	2154	1915	2193	1972	1620	2224	2683	1985	1837	2755
1333	143	28	140	128	8	104	186	122	120	38	1	129	24	55	59	131	36	100	69	964	-3	28	9	117	24	64	173	144	109	67	-2	10	146	1	-21	83	100	75	102	7	67	73	87	23	117	121	149	76	79
1334	768	355	1061	495	442	994	1164	778	452	696	612	620	340	485	394	585	374	375	531	632	454	848	925	755	482	535	736	651	818	366	407	571	1041	458	459	622	648	721	624	530	427	481	573	436	831	772	549	763	899
1335	75	101	72	33	248	44	-1	-59	229	154	293	-7	223	137	95	-13	99	115	44	197	123	45	32	170	49	12	-1	77	42	178	6	579	101	48	-45	-14	26	15	63	141	133	0	233	79	17	-28	12	20	-173
1336	-1245	-1815	-1605	-2162	174	177	-1408	-215	-1414	-682	331	-163	-331	115	-176	-1581	-560	229	-714	-1179	-850	-69	-670	110	130	-208	-2739	-646	-3042	-1717	107	-1721	-2265	-81	-93	-950	-430	-1016	-1403	-450	-137	-862	475	-288	-486	-602	-58	-1856	-1882
1337	208	86	279	191	32	163	263	241	117	96	128	14	131	135	65	143	-31	70	115	180	46	107	186	125	128	149	298	246	177	117	100	201	289	70	288	109	132	103	52	104	122	147	122	69	152	265	53	186	129
1338	-336	-611	-392	10	31	-721	-495	170	5	-409	134	-538	-2	-510	-398	-335	-141	109	-170	-559	-322	-241	-497	244	-158	-211	-934	260	-445	-380	-264	-170	-1205	45	-192	-358	-363	-194	-326	-220	-283	121	-134	14	74	-144	-378	179	-259
1339	-341	-435	-559	-127	85	-601	-1019	-271	137	91	-140	-617	-41	-447	-131	-965	-901	-140	-128	-693	-37	-819	-340	-20	-746	245	-1162	-335	191	-347	16	45	-876	-580	-516	-461	86	-124	-228	-138	-78	-147	-412	415	2	-739	-709	-438	115
1340	528	437	586	479	462	558	320	107	514	392	501	281	405	360	658	357	588	296	198	610	18	506	364	467	284	100	416	432	73	116	166	310	521	197	52	284	233	236	171	378	470	397	336	294	257	316	302	228	151
1341	-1637	-2244	-2113	-2056	-1327	-1792	-2187	-2449	-2027	-1456	-1249	-1677	-1615	-1479	-1496	-1487	-3236	-1072	-1086	-3136	-970	-1243	-1985	-793	-2170	-1590	-3777	-1407	-1191	-1794	-960	-1620	-3409	-1235	-358	-935	-1574	-993	-1362	-1129	-1562	-2079	-1263	-1190	-1373	-1331	-1298	-1467	-1457
1342	-39	-43	35	132	-62	14	16	-26	56	-2	-4	-63	-47	-27	-66	-126	27	-10	-12	-39	51	18	-47	-106	-67	-50	54	-33	-52	92	86	-25	112	-31	-79	-44	77	-30	-17	-30	-29	10	-39	-2	14	-10	99	-42	36
1343	1718	1279	1975	1679	817	1191	2029	1932	1297	933	1171	734	741	815	865	959	1266	871	1037	1305	480	1573	1223	451	1265	712	1556	1419	701	1526	869	1308	1814	621	1329	431	359	707	915	730	885	1030	1096	568	871	1048	808	1686	1257
1344	316	134	718	215	247	225	263	202	479	211	229	222	263	206	258	258	153	361	193	237	66	317	142	252	363	265	28	671	200	138	516	116	833	178	329	78	25	200	278	213	387	79	263	55	456	476	50	297	170
1345	83	50	289	123	247	113	62	316	178	153	157	71	203	95	164	86	311	308	73	341	31	83	104	56	81	160	192	296	70	235	94	161	411	158	158	-1	-18	128	81	122	158	69	125	12	209	262	99	141	86
1346	569	1299	1065	620	1632	821	73	233	1852	1584	1286	449	1244	1041	1741	1046	977	676	868	2240	99	402	706	1223	316	1370	244	999	382	981	752	1450	661	1238	733	1304	753	732	581	844	822	2374	1014	645	1160	368	1131	492	57
1347	1787	-12	3010	1383	1430	1118	1356	1355	1940	-42	103	304	1400	1708	981	1761	2652	1407	1306	1342	980	910	197	1538	1130	1632	1938	1593	1320	898	754	1466	2673	1127	1163	649	692	791	1072	1216	1609	912	1492	839	1378	1632	1133	1251	1534
1348	224	114	238	282	48	158	196	202	182	71	95	48	95	126	98	15	160	10	100	96	102	153	140	11	121	95	250	156	679	58	67	58	272	137	108	166	125	112	108	47	26	82	16	4	87	66	17	106	226
1349	153	39	-466	401	138	-343	-104	169	-478	97	-205	122	84	-18	243	68	-191	76	103	643	-221	-189	-530	-50	189	-27	-643	-164	74	-13	84	43	-465	147	-120	109	-964	108	77	113	-121	154	36	-85	64	208	129	147	281
1350	343	368	724	464	235	46	-89	-146	225	640	455	60	296	269	695	279	100	-49	21	450	102	146	148	54	545	112	690	79	483	452	-191	177	903	214	-278	78	-156	190	-51	437	203	573	208	-98	262	334	188	-143	-91
1351	154	151	247	158	173	94	117	121	79	78	87	54	87	37	155	98	189	104	-49	138	68	147	39	133	95	152	355	147	172	-19	84	147	136	-32	108	26	81	56	60	98	65	60	83	115	127	213	-25	303	216
1352	4801	2853	2648	4421	5889	2935	5111	1227	7355	6734	3457	2254	4628	4860	7462	2755	4334	4265	2689	5104	1266	1061	4174	4182	3689	4174	1436	4147	1320	4245	4215	5576	1903	4675	2374	3197	1090	1719	2156	3150	4807	4030	3737	3683	10185	3172	4631	7635	4258
1353	-54	-33	-117	-91	-48	-65	-78	-76	-95	-27	-94	-21	-4	-81	18	-89	-112	8	-48	-6	-68	6	-34	-65	-47	-19	-87	-171	-68	-40	-21	-64	-102	-23	-69	-126	-29	-80	-30	-44	-57	7	-16	-38	-9	-69	20	-88	-146
1354	-206	299	646	130	171	581	702	416	679	626	319	326	102	70	-26	155	721	186	167	112	81	383	478	145	190	330	-209	267	298	434	109	450	404	242	377	180	406	200	297	337	25	27	536	359	172	203	274	124	483
1355	203	108	231	164	162	55	114	212	126	101	109	93	119	96	81	169	165	129	110	148	76	138	157	105	138	142	236	149	163	109	121	216	264	87	93	-87	-20	103	43	128	179	130	135	110	117	265	119	161	129
1356	186	43	356	200	61	161	240	-418	-10	45	146	-64	-8	-44	190	125	57	182	-10	81	-3	66	106	-45	-67	48	389	-62	-120	-185	-58	-64	349	25	-156	-8	1	49	68	159	191	265	302	76	252	167	195	-169	-466
1357	1055	1528	1748	901	1874	565	1256	1203	1133	769	941	1135	1528	1325	1464	810	1337	515	589	2141	2082	775	571	1642	1257	1251	583	881	1534	1583	899	3291	1202	768	685	659	806	629	943	812	1358	1697	1580	495	686	633	584	1304	1457
1358	552	390	761	435	519	526	584	313	698	652	442	304	459	546	583	408	439	401	319	845	464	380	484	589	328	501	491	560	390	456	168	503	753	341	485	498	370	339	403	340	487	615	376	361	252	414	289	517	387
1359	3234	1758	4000	1828	2134	2185	2634	2470	3215	1710	1593	1126	1536	1755	1323	1615	2947	1411	1321	2983	936	1843	1670	1871	1655	1512	3855	1774	2642	1614	1229	1983	2926	912	1035	1285	1551	950	1229	1405	1397	1314	1694	1126	1380	1823	927	2112	1974
1360	-9	-10	18	-61	-25	26	-67	127	25	15	78	11	21	-48	-30	-22	-45	14	-46	-24	-6	-19	-186	8	27	136	-23	224	202	29	37	155	260	-1	7	-13	239	-4	32	6	109	17	18	95	99	108	-40	201	177
1361	-214	-130	-126	-134	-72	-40	-210	-56	-116	-83	-81	-56	-56	-70	-40	-15	-86	-131	-84	-113	-102	-48	-170	-170	-25	-35	-256	-135	-35	-60	-132	-114	-294	-46	-60	-8	-47	-51	-35	-37	-67	-72	-54	-106	-87	10	48	-54	-96
1362	904	652	821	690	421	419	885	785	1162	438	985	425	560	484	643	299	1179	556	829	2555	1430	549	398	1177	423	1274	1002	572	818	1042	531	769	1179	911	778	633	740	635	768	1357	1298	1450	2094	1599	776	623	246	1352	678
1363	304	89	220	297	400	122	336	134	401	647	96	336	454	230	514	599	197	266	632	1182	53	60	199	555	263	181	452	680	55	858	434	526	212	381	810	465	139	550	202	433	395	646	246	396	282	360	177	129	156
1364	184	141	224	115	84	142	126	292	477	130	268	106	441	197	254	63	731	390	102	370	303	160	184	386	115	136	173	111	140	181	170	498	280	319	192	300	348	155	72	72	97	366	211	178	184	401	111	204	36
1365	1335	1070	1765	1088	178	1104	1127	1442	301	601	1184	1039	862	770	849	1035	343	299	601	467	1196	1178	1432	1391	1225	1509	73	847	488	-110	874	1118	488	386	923	569	134	89	142	210	999	-126	64	1223	134	993	172	902	971
1366	-120	-197	-320	-136	-3	-243	-109	-233	-277	-102	-165	-34	-84	-146	-107	-109	-359	-80	-290	-304	-122	-133	-167	-336	-229	-117	-409	26	-190	-77	-117	-115	-334	-26	110	5	-14	-17	-1	-117	-166	-111	-192	-32	-62	-90	-99	-602	-64
1367	303	263	776	333	111	183	208	251	176	479	192	181	228	365	51	235	247	356	237	225	241	200	262	477	298	180	45	531	202	280	279	229	326	277	374	115	176	196	89	150	121	261	278	516	426	262	223	430	428
1368	136	162	256	101	83	321	159	65	193	93	130	165	119	135	85	107	194	67	66	40	77	209	188	129	147	107	195	214	222	138	-4	115	118	86	122	155	269	49	92	107	94	114	73	59	77	95	109	144	108
1369	990	2605	1794	2016	1912	1068	1021	1187	2680	1305	1060	2073	1651	2133	1829	1358	4200	1406	1084	2853	1684	343	936	1612	1926	1859	535	1105	1468	1931	2866	1841	1273	1673	2007	1654	1531	1289	784	859	919	2472	3119	1565	1590	1246	1987	3489	1714
1370	15020	17275	15112	16768	17138	10903	12484	16858	16403	12314	16361	18167	17561	17067	16403	16854	16112	17500	14843	15262	24472	18848	12134	15864	18719	16465	18031	12364	17493	13078	14840	17369	20723	15082	10206	15260	16473	16934	17081	16234	14049	13711	15326	10996	11291	12795	11957	16229	13323
1371	44	29	5	66	46	21	-57	-13	3	31	47	31	55	-9	33	95	123	47	5	83	88	30	75	58	58	49	115	48	42	4	71	77	118	75	105	74	80	-1	66	38	-11	56	44	-1	-72	92	101	24	103
1372	1790	3155	2567	1154	1114	1795	15688	1146	3583	1838	1442	912	1810	2744	1435	1694	3203	1683	1096	1885	1024	941	1751	1136	1227	2492	937	1429	1215	1262	603	1005	2097	721	834	1263	846	623	1421	1765	1962	1418	2248	2704	993	842	1408	2131	1478
1373	785	7260	6254	623	6139	3583	-398	-865	9695	6816	5763	4378	3068	5611	5939	3349	3152	5773	1717	8042	974	613	4307	2617	2738	3648	862	1337	2052	1244	2521	4805	1582	3581	995	3190	3183	1965	3363	1297	3218	2726	2882	3181	3220	1429	1021	3079	572
1374	-76	-55	-25	73	99	-19	134	455	-30	12	68	47	17	59	-15	122	617	83	107	275	41	-137	87	233	131	90	533	-77	-79	270	37	295	-108	205	218	47	173	41	117	110	290	276	331	1	187	-48	-45	-4	122
1375	4	-2	-17	33	64	-21	73	61	-4	31	-13	-8	62	78	10	-15	68	48	2	29	-1	31	81	64	41	10	-6	7	71	16	-44	38	-2	32	-4	-42	-13	5	29	3	61	70	16	-19	62	-103	12	14	-31
1376	4660	4644	2488	3153	3185	1198	4528	1454	1798	5702	1248	11149	4229	841	2826	3097	5339	932	1045	6219	2700	2809	1212	6566	11473	6414	1678	19693	1033	4481	2904	5431	3984	3844	3966	4431	21084	13488	12168	4670	5834	7643	4079	2598	639	1238	3927	20201	1055
1377	19	184	29	108	187	-12	-35	2	103	43	77	30	112	69	108	58	83	73	90	262	406	141	-75	160	26	64	161	74	42	58	107	51	81	76	31	1	64	96	41	153	145	245	204	155	102	82	68	96	48
1378	3	886	74	160	190	154	161	254	190	1683	668	369	178	164	138	76	-51	168	257	733	137	40	72	69	1199	156	139	1028	108	268	279	85	319	4	84	-117	885	112	236	617	65	299	609	388	4	-46	-15	204	170
1379	-43	526	-96	36	166	3	53	-4	-36	-26	19	44	115	75	116	-23	344	118	45	-56	27	-15	55	89	21	43	-64	-55	411	62	58	96	-18	9	21	-28	66	-4	26	299	146	166	64	343	-2	-51	45	124	36
1380	1616	1417	1378	815	1185	1337	1517	773	2842	1154	2010	366	2142	1483	1779	806	2259	612	1236	3458	1467	557	1580	1785	690	1280	1063	678	890	1735	1328	2023	1166	1687	1194	1249	958	1163	1208	1241	1968	2223	1848	1617	1075	751	1199	1201	1231
1381	1290	1752	2509	1793	2431	994	1710	778	2928	1620	1216	500	2597	1727	2050	2020	2739	699	2027	4266	1576	795	499	2375	694	1074	1079	311	1466	714	1674	2235	1263	1692	670	1067	835	438	669	570	635	4400	1870	1455	898	903	518	770	488
1382	1465	1221	2330	879	1218	1445	1895	1707	1737	1434	1088	1106	1303	1277	700	1262	1485	703	825	382	465	1231	913	1084	1116	727	1013	1380	1276	1097	699	1587	1445	691	663	624	532	801	1002	602	1151	1075	1232	671	671	945	556	1709	1488
1383	104	71	69	188	242	10	174	22	49	77	260	58	65	210	126	108	49	118	173	266	193	115	96	157	28	19	1	28	51	110	-16	257	-39	129	132	44	63	103	77	176	221	257	270	249	4	-5	53	87	24
1384	42	37	29	70	157	-67	57	17	3	59	3	33	59	44	32	51	131	39	62	136	192	9	37	28	55	58	35	-41	11	20	60	160	21	86	38	63	75	49	1	28	-5	52	92	13	62	48	15	-4	-2
1385	52	35	75	22	19	-90	70	-14	28	123	-3	33	21	31	-39	17	132	2	73	115	-51	-3	-79	90	70	76	128	65	-11	152	-27	112	149	-26	60	19	193	4	20	85	53	152	153	110	-34	-15	48	-7	-7
1386	31	0	42	-39	-12	62	-13	77	45	6	21	-4	-23	4	-46	42	15	-1	28	-7	-36	86	-15	-14	28	30	42	-4	43	42	-46	47	35	57	766	115	89	60	-32	43	-9	113	15	8	67	151	38	69	2
1387	1911	1212	1546	926	849	718	853	970	1495	1030	1250	959	690	1067	843	964	782	674	601	2280	795	779	780	1000	587	808	738	864	794	846	567	1762	717	644	495	914	828	952	617	924	946	1425	1136	1031	426	723	927	756	634
1388	12	43	-5	12	81	35	-38	-2	24	82	64	48	74	53	35	50	54	33	69	105	57	10	49	93	94	78	153	55	131	81	71	95	64	32	-144	32	55	86	57	98	61	37	121	89	7	79	40	87	-137
1389	442	611	647	532	340	437	969	802	695	483	257	267	288	445	207	175	345	383	335	449	307	253	524	585	504	362	563	760	323	276	115	399	629	234	564	237	183	334	301	310	223	285	462	414	284	357	305	440	329
1390	177	100	334	58	48	110	188	242	189	134	217	110	23	154	44	241	71	115	85	128	94	142	155	26	77	159	244	65	311	261	111	206	203	100	293	-151	-139	72	69	127	209	109	119	68	219	144	58	296	137
1391	-5	43	58	56	8	-1	55	73	26	15	48	24	48	53	51	93	224	47	-3	138	102	-11	51	73	38	41	132	67	24	47	178	19	183	-4	-2	-85	-157	12	27	88	27	74	34	-2	74	43	78	80	-43
1392	-49	187	-118	-47	65	67	-119	-29	-104	19	33	74	127	225	282	-208	78	1	33	141	-196	-70	-58	91	35	18	-35	-106	-86	64	256	-21	-58	176	103	171	-13	56	12	100	-3	3	2	-57	-47	5	-30	24	-127
1393	142	65	90	212	70	128	151	397	134	137	145	67	116	125	172	49	272	104	89	101	113	138	167	217	74	65	181	86	61	141	56	64	242	59	180	90	120	70	88	78	135	173	101	76	74	180	50	111	125
1394	2654	6765	3387	1646	2189	2951	1885	2193	5145	2334	3947	4207	3709	2466	4968	2102	3974	1891	1712	5593	3173	8670	2505	1876	5221	4124	1128	4272	461	4866	2422	3904	2077	1623	4646	3251	3457	3781	1878	3302	4953	3772	6157	13545	1275	1748	1382	2537	1226
1395	311	344	82	-33	218	49	18	1385	86	65	26	1108	3274	48	231	506	152	76	2879	4725	38	238	20	52	1552	1127	242	144	292	4006	485	1205	189	25	1403	155	1271	1065	171	1042	1761	742	1893	1500	-74	283	244	138	48
1396	-225	-160	-293	-185	-134	-188	-273	-56	-160	-117	-145	-163	-100	-209	-8	-77	-328	-21	-181	-156	-162	-193	-208	-122	-150	-155	-93	-210	-171	-63	44	-65	-166	-139	-177	-213	-136	-14	-38	-101	-97	8	-61	-32	-67	23	-68	-131	-113
1397	397	230	870	610	397	526	544	1024	519	234	202	100	450	505	318	499	1286	526	449	590	118	431	668	561	213	201	1114	613	1409	511	439	564	843	190	206	275	280	144	233	310	567	175	228	313	486	437	287	613	819
1398	22	44	50	30	34	21	43	7	15	37	5	20	46	58	52	-3	85	35	16	36	13	-7	98	56	2	31	35	12	38	63	29	58	75	53	52	-41	76	-2	60	23	53	40	77	8	22	15	15	12	-12
1399	552	206	473	636	751	362	315	590	653	321	482	159	720	953	1688	405	554	972	781	1202	1707	295	300	886	271	1042	305	634	550	308	588	843	813	743	634	865	783	246	270	496	283	1372	1314	651	209	406	218	456	250
1400	1173	1948	1048	763	2197	179	1829	253	246	414	233	411	717	1022	2320	734	942	528	66	895	218	155	-58	1603	326	871	546	1052	682	666	701	1033	524	812	1687	1916	564	931	765	984	1247	908	1548	1755	1031	478	1019	2548	194
1401	-160	-614	-575	-274	-641	-288	-641	-166	-882	-35	-54	-79	-209	-165	-70	-529	-357	-76	-185	-1467	53	-130	-421	-341	-165	-817	-952	-521	-366	-843	16	-252	-1098	-485	-14	-354	-646	-437	-575	-588	-565	-539	-391	-490	-292	-471	-424	-480	-521
1402	-450	-3	-379	-799	132	-389	-845	-122	-570	-500	-228	-517	-276	-56	139	-574	-312	46	-234	191	-344	-584	-459	-270	-162	74	-690	-475	-433	490	-287	-244	-1075	-125	-124	8	-166	-17	94	-168	111	-38	-4	-141	37	-195	-231	-457	-238
1403	3401	2996	4007	2949	4156	3871	3495	4965	3349	1960	5389	2693	2079	3052	2990	2487	2429	1345	2556	3906	4714	5656	2815	3253	4131	2007	2301	4185	1600	1964	3271	2561	4135	1772	2579	2192	1609	2549	1805	3556	2411	3023	1998	3249	1934	3540	1342	2695	2536
1404	132	153	206	53	297	124	-99	152	185	84	284	171	67	65	216	136	293	-10	33	158	94	296	24	66	152	79	-84	200	-70	465	29	64	24	-25	16	51	44	138	89	273	189	66	740	393	-19	-43	104	59	-52
1405	-563	-896	-896	-696	-447	-53	-204	50	-720	-329	-358	-80	-282	-288	-337	-536	-879	-112	-335	-729	142	-90	-497	-510	-507	-538	-1575	103	-920	-666	84	-858	-1501	-568	-283	-419	-297	-101	-157	-594	-525	-916	-292	-385	-619	-347	-554	-739	-228
1406	391	410	432	387	198	307	468	616	192	350	168	260	142	279	227	298	-57	274	255	428	158	232	324	262	197	158	569	226	-199	479	132	318	769	236	-81	-81	-190	167	184	185	139	368	261	376	359	234	149	192	526
1407	1334	1330	1188	1027	773	937	1184	1064	1353	781	556	395	826	1084	1040	934	1699	799	808	1439	580	549	450	960	728	638	1215	760	958	605	979	1388	861	446	593	590	647	394	603	798	586	1175	1428	594	636	512	559	1199	1151
1408	427	151	436	366	360	231	305	332	276	165	123	143	216	453	558	216	213	247	138	501	68	228	224	432	233	304	265	350	169	42	201	349	462	156	173	11	120	332	194	262	215	388	479	185	89	324	149	141	69
1409	-294	-171	-450	-211	-150	-170	-204	-224	-163	-248	-265	-89	-183	-59	-70	-199	-341	-64	-129	-379	-128	-185	-180	-427	-83	-233	-295	-463	-282	116	-296	-199	-394	-360	254	-111	-162	-83	-69	-112	-209	-178	-56	-65	12	-412	33	-339	-153
1410	55	12	55	7	25	-32	21	-89	-49	-24	-21	28	10	-1	42	-40	35	8	2	87	77	32	-77	46	29	-37	-46	-28	-46	53	-21	-15	-24	67	62	-20	72	69	1	26	2	-45	36	50	2	-54	-33	22	-16
1411	-137	59	55	67	297	-37	441	-43	-24	50	-40	67	165	215	228	69	75	-79	39	154	138	116	85	407	4	-19	-39	-21	-68	-26	42	210	-160	212	52	50	-86	105	3	-81	-87	303	105	94	-77	139	61	45	363
1412	-116	-177	-246	-211	-60	-94	-289	-77	-202	-44	-104	-37	-183	-110	-72	-94	-161	-98	-91	-211	-83	-69	-72	-112	2	-146	-48	-67	-193	-141	-109	-107	-337	-32	-28	5	-150	33	-68	-49	-133	-128	-26	-39	-112	-12	20	-60	-67
1413	56	74	218	77	101	19	149	247	139	100	64	79	64	167	35	71	77	47	75	83	-19	44	113	-48	41	48	89	171	221	189	239	74	-119	64	100	20	-57	82	3	99	35	103	99	-10	104	25	38	510	91
1414	-823	-1003	-1084	-1234	-470	-659	-1285	-1322	-420	-539	-952	-564	-393	-439	-240	-985	-733	-787	-235	-925	-925	-1081	-1084	-538	-463	-511	-1835	-1354	-1074	26	-731	-1397	-1914	-518	-314	-124	-655	-506	-525	-524	-771	-521	-561	-809	-686	-1151	-818	-1012	-908
1415	-90	-180	-167	-122	-69	-144	-87	-55	-172	-128	-237	-139	-129	-193	-44	-178	-187	-118	-115	-323	-179	-109	511	-206	-135	-130	-369	-188	-112	-51	-193	-211	246	-82	-290	-83	-238	-145	-137	-142	-179	-140	-209	-29	117	-177	-17	-88	38
1416	54	55	55	39	43	46	16	203	-3	1	50	45	71	73	8	28	1	28	25	17	-58	18	79	73	-16	39	40	125	57	30	27	88	29	-9	24	-4	4	46	-7	14	23	25	46	55	-47	-7	5	40	-36
1417	1367	1070	2019	984	505	1419	1337	1248	1555	1218	1269	176	928	1203	1091	1163	533	775	883	2198	534	1354	697	1106	1084	873	1473	1730	256	1596	645	1522	2508	693	992	1092	535	434	143	651	1107	709	1377	489	943	1243	516	1409	1351
1418	-945	-791	-1035	-813	-302	-844	-971	-883	-862	-658	-641	-643	-537	-792	-586	-677	-1086	-708	-372	-955	-426	-513	-965	-752	-870	-713	-1179	-238	-856	-866	-218	-751	-1369	-644	-627	-729	-721	-343	-612	-571	-637	-776	-571	-490	-654	-615	-729	-865	-925
1419	493	937	1044	473	280	563	415	530	621	427	702	252	1126	618	505	529	1278	624	557	819	553	493	611	991	506	521	284	760	291	226	598	1223	246	320	329	349	268	5	199	657	722	722	727	391	529	805	287	247	363
1420	990	976	1223	644	945	723	776	548	1276	686	901	488	985	695	893	641	2851	572	452	1396	67	389	625	1161	744	254	455	675	412	671	649	1105	475	349	511	766	830	480	445	519	561	1208	1712	378	506	515	302	549	372
1421	7881	7772	4378	5676	5292	4052	3295	5181	7537	6187	7185	6502	8718	3463	6257	6094	9778	4118	4634	9683	5157	4345	3311	5116	4153	10084	3439	6177	4785	5152	3433	7974	6812	7274	3249	4864	4885	3790	4517	5031	7425	8814	9384	7353	3028	3193	4499	5083	2154
1422	1853	267	872	395	807	337	287	929	884	760	358	132	745	361	116	1090	-236	2141	413	2150	449	422	332	421	381	1026	272	1240	247	161	865	1024	1624	341	293	548	539	425	533	227	785	824	1162	637	554	1091	490	1164	420
1423	809	1802	1839	660	1777	878	-67	241	4105	1125	3224	484	731	1780	1246	1035	1414	2639	206	2969	2163	942	868	1392	849	949	-4	436	828	738	727	1582	1172	402	521	590	533	244	521	367	1867	1207	1018	827	347	18	-22	941	377
1424	177	20	271	68	144	90	11	256	107	130	165	77	71	74	62	129	262	70	141	117	102	240	115	84	156	197	48	152	96	91	88	139	195	112	52	-44	-1	77	83	132	207	40	117	114	124	195	78	213	235
1425	-312	-213	-552	-195	393	-23	78	133	-212	-303	136	25	932	45	609	-233	-824	-444	-234	178	-316	-177	-436	83	-3	-47	-1272	-736	866	-388	-8	924	-1537	114	-144	131	-191	389	-140	194	581	497	-75	200	-292	43	564	217	610
1426	-12	-13	44	13	33	30	97	17	57	56	6	-31	57	54	88	85	43	7	18	60	-4	62	-11	38	10	5	57	12	67	44	73	78	81	98	48	71	31	62	43	26	59	33	61	55	9	95	53	-20	36
1427	324	362	7	-206	521	154	-52	439	682	155	333	206	401	544	356	152	637	260	346	74	341	-83	332	494	50	88	100	376	30	225	426	505	300	493	286	518	438	515	191	160	382	142	345	-95	147	185	190	672	353
1428	-56	70	93	273	57	87	-8	241	220	410	31	58	28	44	56	209	-14	72	24	-74	109	-44	-3	-21	85	-50	-120	226	105	-66	119	-3	-51	54	-43	142	53	20	0	91	27	4	-22	91	29	38	33	46	-149
1429	362	1623	2103	573	945	414	272	184	2161	468	1315	73	278	365	828	255	426	228	222	707	1406	124	512	897	214	294	297	238	286	179	285	561	384	322	180	157	224	235	145	202	315	1633	506	234	184	208	203	347	209
1430	553	234	944	1263	690	565	949	353	901	973	516	211	989	501	1026	248	607	1096	293	220	607	205	539	366	363	242	350	316	414	783	567	1070	373	882	646	681	519	346	230	155	218	239	133	134	646	226	500	385	440
1431	-333	-431	-484	-371	-344	-360	-273	-347	-346	-305	-450	-129	-272	-413	-224	-317	-514	-276	-314	-285	-53	-260	-514	-440	-178	-293	-378	-439	-248	-320	-203	-333	-401	-178	-254	-211	-273	-98	-117	-220	-279	-264	-256	-239	-327	-164	-198	-361	-399
1432	116	-148	94	85	-1	62	-5	128	-144	49	36	53	5	20	7	1	-28	-23	73	-102	-7	-24	-9	-21	95	36	147	9	58	76	-27	-67	89	-39	-43	25	114	28	-1	50	81	162	23	-84	-49	-30	20	52	88
1433	4279	13116	6428	3675	6411	4201	4239	3625	10626	7341	13447	5459	7492	3139	5550	4538	3282	5267	5160	11184	4499	8800	3995	5819	6383	7484	2315	7905	3402	16136	3627	8052	3456	4037	6057	5202	6723	9089	6336	15224	13678	10197	14999	11105	1857	2049	3512	7770	4328
1434	154	109	181	175	123	192	225	169	163	165	89	153	119	146	125	174	-92	163	160	142	114	96	214	150	88	111	230	123	257	143	-48	187	111	98	-33	28	82	151	99	20	93	209	102	76	114	149	149	109	204
1435	-887	-767	-1155	-680	-398	-289	-988	-817	-667	-577	-318	-681	-197	-741	-6	-290	-542	-459	-217	379	101	-615	-763	-113	-580	201	-1232	-333	-857	-287	35	-655	-1055	334	0	-195	-370	-7	-626	-187	-189	-8	-58	254	9	-311	-228	-803	-1072
1436	718	68	920	921	97	693	235	563	627	170	61	439	198	225	365	233	-140	54	90	355	277	632	604	47	42	80	316	236	102	170	277	224	-273	126	295	151	242	244	99	145	158	313	214	91	359	290	61	254	170
1437	115	3	19	5	9	58	45	19	55	14	-2	30	62	18	46	16	28	46	-10	35	-74	44	-34	129	28	-21	114	31	35	9	27	21	-29	56	12	2	7	41	54	40	-33	-19	5	8	24	87	58	24	-4
1438	-146	-139	-239	-165	-69	-64	-226	-194	-127	-118	-19	-76	-69	-127	-34	-137	-307	-140	-108	-193	-219	-94	-93	-88	-89	-4	-244	-98	-168	-163	2	-107	-400	-147	-72	-127	-176	-24	-128	-53	-81	-134	-129	-89	-24	-159	-45	-118	-108
1439	20	115	9	20	65	78	73	134	-60	-7	-28	-56	-7	17	60	23	77	34	12	26	12	-23	51	29	7	-2	-65	-19	32	20	90	-11	-89	-57	19	-78	-112	82	51	49	18	37	0	47	12	95	61	22	-28
1440	-399	-512	-775	-627	-94	-544	-772	-1368	-809	26	-301	-605	-188	135	-624	-537	-327	-555	-549	-677	-126	-1258	-600	-343	-826	-569	-605	-1163	-35	-235	-657	-1150	-1314	-399	-295	-94	-541	27	-550	-466	19	-423	-667	-531	-559	-373	-373	3	-57
1441	116	99	287	140	163	179	136	133	218	80	84	110	270	173	116	337	57	178	294	136	294	60	197	226	89	191	111	125	92	214	342	502	455	139	295	198	269	102	134	76	115	227	207	136	74	167	48	94	100
1442	355	-35	493	199	-76	-19	181	77	249	64	-56	21	183	-186	71	-94	91	138	-104	51	-274	-68	-51	7	103	38	159	405	165	-105	31	-297	494	-223	-271	-8	115	118	-236	113	185	37	161	133	289	283	-170	218	55
1443	-97	-14	-63	-31	-9	-16	-87	-50	160	-31	628	-11	-28	-72	-1	-38	-80	-65	-69	-52	-36	-102	-56	-77	-24	-53	-118	-50	-84	-26	-46	-42	-109	-89	-60	-80	-117	-7	-44	-64	-54	-63	-12	-2	22	-15	27	-76	-168
1444	165	97	14	69	7	152	164	200	98	111	80	27	111	103	82	36	212	43	64	26	81	142	56	188	122	71	118	130	163	60	6	117	173	51	52	179	25	41	18	114	30	114	21	87	154	252	155	84	93
1445	486	491	569	293	421	293	369	293	843	451	581	308	812	675	763	621	640	511	396	2105	1154	256	360	789	397	644	603	241	254	637	592	1117	807	839	367	462	653	365	146	290	477	1123	753	380	521	448	213	434	302
1446	297	715	773	528	400	606	924	451	784	391	701	237	629	781	850	1024	1953	691	640	1518	1024	357	769	956	237	289	674	-48	603	409	956	591	723	746	432	422	438	183	440	366	465	741	513	444	142	319	195	669	755
1447	439	1169	755	1400	885	1175	1663	2484	555	1054	1092	1097	974	1298	341	1097	1841	1031	1126	711	732	1347	1299	338	1525	1098	2151	562	1171	799	1054	1086	2306	325	1922	243	140	449	1010	878	893	934	465	684	1198	597	592	560	572
1448	802	575	978	1042	1302	782	868	662	1759	1071	904	300	1873	1998	1770	1072	2871	586	677	2592	2247	438	547	1376	464	660	909	813	626	494	922	1608	937	1343	723	862	1073	421	566	317	546	1231	1598	333	636	566	582	431	449
1449	-229	1034	-185	361	89	-58	-275	-298	-18	119	11	8	-205	-98	130	225	351	-23	-64	140	-62	-201	32	341	244	-87	-132	-188	-199	199	-52	-156	-148	-92	-45	-121	988	70	411	195	-146	444	420	645	-94	-149	5	118	-88
1450	-24	-22	-214	-79	126	-197	-31	44	-370	99	88	84	85	19	105	-135	375	-35	-196	253	809	-41	-18	249	144	-49	-190	176	-336	222	-69	120	-158	183	33	-65	110	25	139	44	111	-109	161	-27	47	169	55	874	137
1451	30	34	232	196	165	30	208	356	227	276	148	-4	160	17	26	177	339	250	250	233	-7	325	20	30	67	227	405	98	207	218	56	214	501	72	-4	-25	36	73	92	180	247	88	196	197	227	319	190	497	331
1452	255	147	242	265	239	76	228	280	172	55	176	-25	169	266	292	100	302	173	104	230	158	147	32	160	158	142	200	263	73	161	163	226	136	139	122	219	210	158	109	122	142	209	313	111	122	157	53	101	110
1453	143	533	542	775	1237	369	578	298	598	519	364	169	279	528	684	340	1729	84	168	1071	500	149	455	1074	313	158	291	101	732	347	441	523	424	644	98	-11	392	202	323	28	-3	595	235	104	519	175	114	636	675
1454	-1566	-1109	-2200	-1862	-590	-2297	-2537	-2093	-1494	-1690	-729	-959	-980	-1144	-269	-1464	-2174	-885	-863	-315	-382	-1619	-1263	-247	-742	-286	-2594	-1689	-1323	-1233	-756	-1013	-3970	-284	-656	-982	-874	-141	-1599	-625	-739	-839	-516	-670	-1148	-1094	-1161	-1629	-1180
1455	658	437	716	679	791	408	695	571	170	285	140	136	460	771	597	631	1339	476	353	1245	128	243	398	806	512	243	200	424	793	442	321	759	760	624	324	421	309	324	208	676	667	628	795	297	783	625	950	571	240
1456	617	671	1248	635	634	609	567	824	800	551	510	290	443	964	540	31	988	501	331	572	219	405	197	885	408	402	397	1006	732	228	353	507	608	292	620	180	242	320	324	490	570	322	629	688	272	365	345	797	601
1457	-131	-98	-277	-182	-22	-206	-189	-209	-187	-128	-54	-181	-52	-137	-108	-165	-144	-60	-37	-110	-98	-98	-210	-46	-146	-98	-242	-144	-161	-219	2	-113	-188	-104	-406	-65	-97	-38	-112	-95	-141	-193	-145	-99	-122	-167	-53	-132	-351
1458	39	-16	5	-368	-17	-39	-72	55	-133	-56	-244	-33	284	25	337	31	-337	110	16	418	86	87	-62	89	25	32	-403	-12	185	1	16	147	-159	-25	93	90	-2	225	-24	30	91	1	199	-21	-112	0	124	-87	-204
1459	-185	-12	-555	120	-74	145	43	-95	-213	-166	100	45	-134	-162	-57	-284	-175	108	-200	-258	-116	5	-62	-237	31	-213	65	-156	-453	-154	-205	-152	-252	151	-168	-53	-236	105	89	-28	-246	-7	-34	-203	114	-33	-61	-183	-144
1460	-181	-52	-128	-57	-24	-55	-110	22	-100	-124	-96	-27	-103	-19	-42	-81	193	-5	-55	22	-41	-149	-26	-117	-83	-91	-150	-103	-29	-80	-100	-48	-111	-25	-21	-145	-72	-43	-49	-60	-110	-56	-47	-25	-27	-38	5	-68	-74
1461	-170	-671	-768	-527	-256	-380	-297	-484	-622	-405	-94	-264	-227	-303	-286	-289	-499	-305	-95	-281	49	-176	-495	-130	-284	-263	-219	74	-488	-382	153	-273	-715	-108	-240	-22	-145	-255	-227	-115	-203	-163	-396	-415	-192	-25	-345	-221	-413
1462	476	364	489	490	174	330	401	1066	245	443	189	258	429	881	597	583	402	3570	491	475	259	274	288	333	279	638	688	659	513	443	374	512	750	201	487	355	472	222	295	1206	1315	316	1302	340	399	1030	574	297	387
1463	1054	923	1632	1065	1037	787	1056	1074	1273	754	1157	306	1203	1182	820	860	1149	812	821	1537	441	723	560	717	329	696	1214	1042	874	794	727	1169	1477	450	584	458	393	323	491	703	854	1025	1013	253	848	991	381	934	533
1464	-107	-54	-46	-28	-12	44	-58	50	-20	-19	31	-45	-40	7	-2	-27	-43	-19	42	68	6	-57	-53	-142	97	-40	-25	-2	5	217	37	-13	-42	-20	211	-20	-82	4	49	-11	-94	11	6	-20	7	-113	-38	-42	197
1465	-14	-225	-72	-95	-72	-17	-58	49	-94	-254	-122	-222	-28	-121	-162	-14	-110	5	75	87	73	-236	-110	102	113	-149	-212	304	150	157	199	-80	22	15	-67	-13	-38	12	-47	-106	-138	-65	53	-98	-142	180	-177	245	76
1466	227	132	312	60	146	252	15	337	29	135	57	-11	37	238	23	170	32	112	117	158	34	149	106	189	200	138	295	224	-99	175	199	206	222	25	-60	127	120	125	-3	171	91	149	121	73	19	41	223	184	50
1467	3	9	26	53	-62	-113	-47	-32	-118	26	-14	-50	-50	-4	-5	-25	-7	29	-39	-87	-32	-31	-13	-43	-30	-36	9	65	-29	-17	-54	-96	-115	-21	-52	-28	-52	-90	-68	-101	-73	12	-17	-65	37	-90	5	-61	-36
1468	8	41	94	70	-10	-24	87	68	49	25	-20	31	35	21	23	-17	41	9	3	30	34	9	36	26	8	2	81	19	76	29	12	43	51	3	-139	-56	-2	-34	29	16	-7	-22	56	6	0	54	2	4	24
1469	98	43	458	-11	94	330	75	178	230	71	202	5	143	119	20	35	162	241	30	251	68	5	100	270	38	219	253	301	-48	88	142	64	66	86	127	23	136	92	-12	25	145	10	39	110	117	103	78	339	250
1470	194	119	285	220	32	277	184	319	77	33	200	173	57	121	116	129	112	136	12	158	114	146	218	125	158	106	251	91	-39	17	8	53	-14	36	26	93	110	166	369	106	185	59	132	89	119	175	10	108	48
1471	-130	51	-276	-139	18	-131	-164	-452	-1	-233	162	-130	58	101	106	-399	-87	244	-37	-212	86	-282	174	-274	-49	20	-472	43	269	-49	376	917	21	914	475	160	361	-17	-83	-144	-7	118	-175	-164	434	84	-68	7	-110
1472	265	160	141	69	125	-78	90	80	113	45	163	176	563	155	208	404	-265	204	284	947	79	179	-159	300	514	941	173	125	238	110	430	286	180	180	132	192	97	333	64	94	258	549	434	560	77	260	432	251	180
1473	959	2475	1170	666	1015	844	549	473	2071	1328	2579	1227	1534	1258	1616	1467	2188	1137	978	5304	3117	1065	1227	1321	1126	1054	807	941	638	1378	712	2023	881	947	778	1080	1033	658	887	1709	2355	2903	1884	1122	781	329	503	895	415
1474	601	297	234	39	186	83	404	-161	64	-94	393	160	13	-255	116	296	78	260	-47	314	326	35	203	501	374	299	422	354	-234	340	-109	191	1071	341	86	674	551	187	437	666	71	701	305	419	501	-221	482	-317	-331
1475	-664	-529	-661	-922	-227	-364	-583	-737	-670	-408	-388	-428	-348	-478	-373	-310	-861	-342	-129	-265	87	-479	-440	-355	-338	-343	-930	-415	-553	-423	-388	-200	-884	-231	-427	-170	-228	-262	-174	-396	-439	-526	-334	-269	-396	-499	-452	-683	-569
1476	-153	-144	-278	-98	-74	-133	-144	-250	-169	-24	-152	-173	-60	-123	-57	-130	-136	-174	-93	-116	4	-252	37	-153	-132	-120	-107	-185	-127	-40	-75	-53	-311	-42	-72	-53	82	15	-75	-100	-171	-102	-57	-73	-114	-82	-122	-205	-38
1477	-637	-438	-691	-617	-15	-512	-525	-886	-551	-268	-434	-344	-294	-515	-374	-294	-668	-255	-252	-362	-147	-503	-697	-450	-430	-72	-835	-608	-724	-533	-226	-337	-639	-338	-396	-161	-312	-241	-368	-210	-62	-346	-43	-253	-314	48	-419	-685	-538
1478	29	-41	67	-537	385	-62	188	-43	67	131	92	-114	-16	48	-49	49	-117	156	21	241	-44	119	-72	60	7	-140	314	299	49	-121	-4	-91	307	14	9	133	154	-18	1	98	113	-80	126	-34	207	254	-68	-160	189
1479	287	354	361	93	124	289	45	83	288	115	204	114	211	323	301	147	393	269	93	135	189	52	224	468	66	194	269	292	221	149	63	146	24	283	185	226	92	90	72	226	226	284	162	365	-14	180	142	260	129
1480	1185	1337	808	2226	3197	908	1403	1073	4877	2385	2049	2052	2149	1945	3238	2058	2847	3247	2736	7479	4052	612	1170	1756	2077	2622	1952	1395	834	998	2063	3704	950	4910	1297	1787	5531	2581	2696	1302	1301	5968	3727	813	2806	3545	2503	3523	1755
1481	277	200	287	274	252	122	126	175	275	123	103	77	241	336	244	296	394	168	89	384	143	99	245	231	117	155	78	166	241	154	128	299	273	159	103	130	223	79	143	118	154	240	203	147	34	164	-48	120	175
1482	253	167	562	337	160	261	252	463	746	372	442	-38	136	397	-116	181	1007	244	171	317	144	294	294	-23	142	336	175	424	326	110	75	185	591	67	-310	5	99	-11	55	235	262	297	104	185	24	399	38	261	262
1483	844	655	404	350	162	542	344	737	305	222	189	169	200	166	413	284	230	501	209	826	103	528	473	212	283	156	608	514	209	566	193	248	1133	162	185	137	375	225	171	539	178	120	214	222	352	229	177	274	468
1484	336	209	482	480	402	268	347	326	446	134	334	182	259	387	400	355	329	176	228	373	158	328	250	530	315	128	283	386	184	176	247	279	303	23	242	189	257	190	301	231	177	321	322	246	119	154	91	243	214
1485	-38	-6	-42	-9	28	-8	-38	-4	2	31	-54	5	11	28	-12	-24	50	-8	27	-16	-17	19	3	-21	39	29	48	57	-32	55	-33	17	34	14	0	69	81	-41	-29	-17	14	-12	18	-28	-24	-38	-7	-31	28
1486	-111	-270	-223	-47	8	-65	-324	-374	-37	-28	-78	31	116	-284	108	121	-15	-5	-53	-246	143	-222	47	33	-137	-212	250	-12	-17	-264	-142	-146	9	57	-156	-10	391	-46	261	-44	-235	-5	-171	-119	-132	-193	-132	-195	-283
1487	112	89	120	219	114	69	42	191	45	90	61	135	20	119	136	101	309	85	2	44	109	66	47	168	14	25	176	67	70	199	121	43	232	98	-4	94	63	49	7	60	141	106	14	79	112	-41	35	247	238
1488	284	87	237	211	133	204	122	220	181	61	130	162	92	133	31	119	146	74	5	115	53	141	123	66	158	83	198	185	199	33	-65	121	136	98	240	-108	-48	37	97	76	82	58	115	76	119	12	162	-10	105
1489	88	-15	-6	126	-10	-16	43	103	108	82	108	24	42	74	-7	12	118	27	9	83	63	22	60	66	-16	7	117	-16	125	63	0	104	-106	-31	-38	-134	21	-15	-24	35	47	-6	36	76	19	30	71	29	110
1490	795	1319	1754	725	1358	732	524	176	1600	1073	1663	1020	1526	1085	1451	1057	742	1181	885	2423	2578	865	1022	1228	653	741	112	666	146	1301	851	1659	249	939	747	951	1059	265	594	1117	1322	1660	1419	1290	414	260	373	246	209
1491	96	91	54	153	237	163	67	7	130	115	106	50	73	318	342	162	183	129	88	592	409	111	79	129	77	65	103	-43	-20	105	189	191	142	129	45	63	53	111	193	48	45	134	188	31	132	-121	45	14	-14
1492	250	581	238	-11	-17	280	-136	-4	576	-62	312	125	1132	121	38	88	741	-64	654	-94	-3	-81	-83	-13	143	106	-31	154	478	251	340	1113	95	9	-14	-56	349	197	49	31	39	187	226	99	-79	33	244	140	84
1493	-107	-36	-95	-17	1	-120	-53	-86	-30	-31	-44	-70	-16	9	-6	-2	7	-26	-21	-25	-73	-19	-144	31	-56	-28	46	-65	-152	-5	-81	-4	-85	-14	-149	-133	-187	-25	-43	-9	-57	6	-23	-73	-119	-23	66	-36	-158
1494	353	75	366	207	135	208	325	217	213	245	235	70	46	189	139	227	179	62	128	185	54	238	286	221	294	204	337	57	207	129	222	306	299	170	295	124	19	150	129	209	146	103	165	43	27	38	81	195	146
1495	-658	-557	-956	-1404	-181	-899	-1031	-971	-708	-803	-540	-599	-396	-730	-315	-352	-498	-218	-167	-114	-389	-554	-600	-747	-260	-225	-1146	-543	-671	-275	-88	-284	-1186	-572	-622	-625	-709	-555	-632	-148	-173	-474	-220	-201	-466	-785	-373	-1115	-391
1496	88	183	378	238	284	129	238	160	224	303	352	-18	234	402	134	246	157	121	107	668	278	-1	117	432	103	107	306	98	298	276	258	312	386	272	69	40	100	118	64	166	110	287	334	249	172	231	116	147	226
1497	529	13	215	80	48	17	216	626	69	71	49	110	386	142	51	43	203	-15	190	393	372	166	100	202	129	284	51	690	143	138	117	101	94	169	21	610	-36	158	253	229	177	-37	303	-94	264	221	144	627	24
1498	44	-20	37	-38	-4	-65	-23	73	21	-1	-17	-41	97	5	-57	48	111	8	36	-4	-31	-56	60	-116	-64	-64	84	21	55	-20	-58	26	-66	-48	7	-8	2	64	-61	-10	97	32	-3	-13	-4	-66	132	-46	115
1499	266	273	322	153	88	55	132	61	214	108	134	60	204	75	160	286	306	232	84	514	51	230	34	159	158	229	608	265	295	161	113	186	364	136	264	48	29	222	64	141	311	193	321	158	47	316	109	146	110
1500	1118	589	1741	809	326	1010	757	1202	1329	672	896	406	606	495	504	830	-121	716	353	777	394	598	651	705	800	683	1148	1445	540	588	506	637	1297	305	372	434	502	532	513	553	751	458	714	524	541	762	401	949	841
1501	-49	-1	28	-22	-20	-1	-13	-41	-63	10	-103	-7	-66	-67	-11	17	107	-53	0	83	-103	-17	56	-88	27	-7	53	82	-40	118	-71	-27	8	29	36	16	15	135	-57	-10	-1	104	-33	-36	0	-64	-78	-80	-137
1502	314	80	26	173	187	106	183	61	126	78	86	5	80	246	7	60	-26	39	41	108	91	-41	220	26	122	1	-156	38	118	217	54	57	-145	15	278	68	99	-37	34	51	354	81	16	39	92	28	48	-59	57
1503	168	57	83	149	71	72	89	142	136	65	54	109	113	-76	65	170	6	26	117	113	181	90	100	196	99	-119	70	287	243	62	46	133	172	81	161	103	54	27	30	95	53	28	85	123	44	213	-12	254	170
1504	-95	57	-78	70	-19	10	25	85	141	53	-28	53	-65	-10	-69	-40	-56	35	-81	-110	-91	-14	81	28	-36	-234	25	26	171	24	-128	-88	-45	65	52	91	-17	102	77	-78	-141	-13	-22	-99	-49	33	-48	26	125
1505	144	50	78	24	150	-69	151	-413	236	2	85	-150	-79	52	-23	-212	-154	-78	-66	-185	146	68	-233	-92	188	-194	46	195	51	42	2672	-41	-74	156	-69	231	-18	-11	58	-190	-81	29	73	69	-122	54	68	14	-36
1506	-35	-78	3	61	-22	-44	40	-221	-45	-21	-112	37	23	-22	-46	29	-161	1	-80	-51	-41	-48	-146	-69	-65	-70	-183	28	-95	-38	-54	-6	-151	76	16	-177	-122	-36	-32	-14	-43	-36	-34	8	-47	-25	17	-84	26
1507	-761	-464	-1017	-1105	-453	-753	-1021	-1284	-977	-638	-613	-695	-491	-608	-590	-801	-1203	-592	-554	-326	-438	-262	-733	-612	-774	-410	-1115	-757	-601	-793	-422	-654	-1149	-499	-699	-723	-604	-428	-607	-530	-375	-677	-570	-303	-551	-759	-597	-983	-795
1508	1810	2961	2471	1389	2015	1392	1695	1416	2844	1410	2160	1013	2213	1886	2309	1453	2649	703	1092	3048	1726	1469	1632	2184	1871	1301	1300	2462	1581	1596	1910	1870	1678	1801	1317	1483	1548	1716	1253	1985	2211	2283	2036	1947	838	865	1875	1711	1397
1509	-444	154	645	221	-34	147	398	151	313	407	238	179	251	300	169	773	173	228	91	-67	172	-43	252	377	-40	225	248	376	-51	183	388	308	363	112	384	250	264	28	238	229	-46	142	12	250	169	478	231	366	-201
1510	117	64	103	-10	160	-26	47	-40	133	54	224	11	304	134	166	132	165	-24	168	415	219	70	45	179	76	-35	-59	24	86	210	201	208	-58	172	233	171	78	274	6	167	318	237	247	196	-4	105	106	98	48
1511	656	328	1123	629	399	460	957	596	701	390	521	308	297	348	412	455	551	571	398	530	337	787	246	476	354	729	927	1013	314	467	287	191	975	200	197	234	190	460	261	211	519	331	425	391	426	636	210	711	577
1512	24	-30	-27	29	23	-16	-23	-26	-16	-16	-33	27	-11	3	-7	1	-26	-30	20	19	12	-49	-51	-20	-17	-57	-28	-21	-43	-41	98	17	-51	62	76	-14	15	-11	-21	14	-11	-29	22	2	14	-33	-5	10	-45
1513	421	64	136	54	133	-10	126	514	77	65	35	11	60	655	128	13	-43	262	-42	466	142	300	-30	112	21	107	46	123	366	37	46	24	58	-64	93	103	69	57	15	162	233	55	87	228	-79	347	149	68	-4
1514	-137	60	-58	272	200	96	-156	440	-148	163	-412	168	646	601	87	-278	-21	9	329	59	403	-275	-72	110	-2	-242	-117	127	-764	-329	29	463	45	198	-334	1	91	105	-276	-526	-497	40	446	-327	-42	123	-55	-384	9
1515	744	238	818	717	782	231	693	403	163	57	470	110	556	283	591	490	662	389	337	1041	197	128	214	727	298	827	726	1330	565	454	825	344	260	763	584	753	524	547	190	1033	1059	1232	1473	1061	569	388	432	508	444
1516	271	149	179	236	110	314	250	191	194	39	193	119	-7	148	-4	74	162	182	36	96	43	253	93	64	154	39	79	195	180	49	31	50	196	136	312	50	19	179	232	59	41	95	103	89	67	-61	10	14	100
1517	90	200	353	14	43	35	149	44	87	247	52	129	130	89	80	101	65	114	53	167	-86	41	68	31	137	11	175	-74	93	103	-25	132	232	82	16	-71	119	54	57	157	77	148	170	171	94	7	116	-25	211
1518	83	115	196	302	88	151	109	254	111	72	161	77	52	38	150	126	134	55	111	99	128	226	174	164	139	161	139	292	-79	-20	264	79	190	122	187	13	-19	28	68	83	109	73	68	-5	129	141	83	-59	64
1519	911	886	1516	747	536	398	601	829	833	882	600	515	363	911	578	714	794	713	492	437	316	681	980	905	622	630	816	1006	434	417	802	649	1384	300	403	784	489	753	782	819	857	485	544	630	379	666	671	917	767
1520	485	339	-218	43	125	113	781	-472	624	-132	213	-28	474	95	449	-155	118	-84	151	1665	-81	646	-167	847	145	331	-771	760	-197	171	111	250	-784	721	-48	515	268	873	346	647	410	936	442	787	-339	182	322	-26	-192
1521	927	3244	2550	1764	1086	2258	1754	1523	1805	1746	1792	682	1155	1987	868	1104	2101	782	2389	4296	372	1069	1430	1494	1669	1649	262	659	1242	3717	1582	1788	866	923	2372	1535	562	1328	1166	1082	1237	1773	1629	1603	1607	986	1443	789	954
1522	266	473	1174	371	626	656	374	451	988	689	661	268	403	536	345	816	430	450	792	1767	68	324	357	617	299	186	358	429	134	465	355	516	390	298	197	604	273	391	358	556	434	663	933	970	182	206	109	550	134
1523	1186	877	1403	945	1190	336	1072	1320	1187	384	883	353	572	797	832	342	506	389	368	1851	2178	1353	596	1480	544	547	888	683	833	514	210	709	562	464	216	268	92	525	326	409	822	1274	971	305	332	530	180	501	415
1524	92	1185	711	626	589	215	-95	-632	715	874	941	244	666	913	1242	901	1701	568	562	1769	-221	210	754	1769	706	542	-100	608	386	929	437	1229	-1052	291	653	926	632	311	609	876	674	983	892	647	389	728	305	339	478
1525	123	72	392	148	-30	208	470	212	259	153	237	-20	-34	199	-181	148	-242	175	7	-74	-48	163	296	103	12	127	273	229	5	-211	77	-103	206	-151	69	-127	-138	-80	35	-114	-181	10	114	114	194	375	-221	245	281
1526	-78	-106	-115	-45	-84	90	-40	-212	-127	-36	-72	-51	-53	10	-47	-145	156	-8	-136	-101	79	-26	-112	-237	-101	-130	165	-53	57	-4	-111	-82	-126	131	-218	-22	24	50	-89	-116	-99	-121	-57	-51	67	-66	12	-35	55
1527	39	-55	-68	-63	-41	-138	-16	20	41	-50	-115	116	43	-80	0	-45	-92	46	-12	-19	-314	57	-174	-199	89	-63	126	362	-349	98	-35	-183	88	-73	-4	26	270	64	-46	12	19	365	60	-27	249	141	15	57	-110
1528	1655	2104	1938	1381	461	1209	1440	1617	2243	1129	1773	879	1832	1360	1237	940	1675	773	873	1537	1725	1452	1472	1226	689	1520	1334	1552	1073	1425	972	1570	1625	1421	855	1340	709	1111	934	985	1481	1267	1070	1034	1098	1066	726	1276	1247
1529	-45	32	134	119	29	30	47	163	98	48	-37	64	116	85	25	22	184	13	54	213	-37	-104	18	83	-51	114	78	70	-16	-8	113	8	31	-76	-115	14	116	80	-88	22	157	117	-23	55	-7	72	40	-60	-110
1530	718	562	831	646	239	213	717	587	330	415	237	215	445	517	245	517	511	441	279	475	753	652	383	1109	383	685	747	712	437	80	548	328	722	381	98	444	259	229	363	327	535	321	288	377	404	620	360	739	283
1531	86	171	-44	235	120	51	25	-50	-58	-79	-38	0	-24	116	212	-85	240	-13	-120	221	128	-94	-51	163	-147	-109	-42	176	19	23	-12	207	-339	201	-192	26	157	67	43	-112	-195	172	-24	-46	164	167	-152	-98	-2
1532	403	402	374	503	663	426	332	467	378	85	364	66	401	524	665	389	766	312	358	1066	228	332	127	468	231	297	98	337	235	416	363	483	79	309	617	166	394	41	255	270	366	768	774	287	319	332	261	305	175
1533	-163	-167	-201	-342	-59	-195	-325	-445	-132	-195	-89	-117	-98	-264	-117	-253	-401	-130	-16	96	-88	-47	-245	-107	-120	-181	-256	-156	-450	-251	-48	-164	-448	-9	-146	-339	-168	-365	-295	-305	-326	-238	-180	99	-162	-412	-246	-245	-187
1534	536	987	583	524	376	316	554	761	417	574	379	425	430	639	283	459	2196	282	664	285	660	513	474	512	378	446	721	678	445	678	359	581	645	369	300	483	483	231	459	305	387	366	338	324	441	589	371	820	839
1535	-413	605	-428	-158	511	528	-285	-203	-359	-239	63	-607	269	-39	840	220	540	13	-439	-26	149	-27	123	678	-115	-24	-330	439	446	-526	-294	68	-632	222	180	109	292	79	-538	-144	-294	57	326	167	94	-30	330	-734	-536
1536	41	69	135	30	110	72	-65	13	36	76	55	71	65	121	58	204	243	78	63	72	39	92	47	61	100	111	195	171	-1	11	18	83	141	76	-168	47	36	72	-1	84	123	-21	91	58	37	64	81	115	-115
1537	355	109	224	239	184	87	220	257	210	234	123	146	57	233	98	142	194	345	296	256	194	147	151	113	135	170	319	173	289	175	168	240	329	162	112	209	188	79	154	275	309	143	134	77	259	257	241	276	165
1538	-268	25	-134	-8	-187	-3	-57	-338	-132	-39	-38	-125	4	-99	-146	58	-248	29	-288	-188	-83	22	-233	-454	36	316	-364	-125	68	-637	-52	69	-160	-73	-310	-65	15	-70	-35	81	87	-32	-182	129	159	-2	50	-122	117
1539	-8	76	184	71	111	117	115	-46	106	111	129	10	40	-3	103	32	260	153	25	64	86	90	45	135	19	91	46	74	52	22	39	71	199	7	36	-31	32	67	0	45	57	-12	66	39	127	43	5	291	185
1540	325	359	351	395	370	227	497	155	321	266	275	238	201	394	407	301	599	295	318	612	139	241	246	332	297	269	367	161	547	212	325	432	368	242	223	186	385	248	145	210	158	543	432	152	389	254	335	314	365
1541	733	1277	1985	813	1199	1324	781	686	2591	1701	1744	896	1158	932	1178	896	460	977	756	1619	-27	814	929	1015	670	1229	464	1228	500	919	842	860	977	1466	622	631	739	746	575	786	1298	1450	957	1233	1053	530	1159	721	327
1542	621	552	548	608	518	522	892	634	576	461	384	409	279	425	424	398	818	446	549	810	183	507	522	420	559	692	383	458	512	410	659	766	766	345	475	303	547	248	276	582	610	431	622	313	566	463	546	724	675
1543	575	807	883	571	1031	988	732	311	1408	754	686	642	1014	1104	1062	549	50	318	504	1634	1235	289	701	733	534	773	-106	888	973	824	825	1796	89	823	947	594	263	859	433	937	547	1183	1617	325	359	252	1197	636	468
1544	-15	26	31	-30	-1	140	-53	-82	60	31	-43	-10	38	116	3	12	94	35	30	-23	39	7	81	-23	-4	23	67	-86	-74	-42	-73	60	82	-15	-40	-66	49	-108	7	9	-43	-26	57	-1	29	-90	-15	25	-50
1545	123	220	460	33	190	26	255	380	396	90	221	61	225	537	209	67	210	306	102	436	346	87	-43	353	186	273	-20	181	251	136	195	441	149	237	206	11	49	30	21	116	125	223	372	36	84	121	20	295	170
1546	103	269	96	-36	44	49	25	256	96	196	112	40	-16	-44	1	114	82	-52	155	199	0	40	47	33	109	34	131	72	285	26	222	-1	245	-75	36	-35	71	-67	12	18	14	-39	57	10	84	74	30	119	64
1547	2022	1425	2352	1807	1391	1200	2039	1562	2421	1473	1541	875	1609	1331	1008	1410	1171	997	920	3185	2241	1768	1445	1172	1093	1664	1896	1494	1447	1099	1143	2478	2266	817	757	1045	1064	1199	1056	1396	1355	1919	1934	1230	1033	1156	1054	1319	1247
1548	40	144	43	-21	355	-33	43	97	62	107	73	37	178	151	30	2	367	13	109	-22	14	141	58	442	99	155	67	-45	177	167	71	143	172	128	209	170	139	115	170	168	61	301	235	-31	17	303	-43	280	440
1549	265	293	765	299	245	442	593	412	633	334	298	301	203	230	116	228	211	358	220	264	236	236	454	487	236	230	494	639	332	120	195	303	471	270	57	263	385	398	341	269	223	121	249	152	144	440	279	622	339
1550	15962	21492	18010	18467	16105	11471	16188	13618	18757	17741	21851	9174	17992	18691	13319	18762	12462	14221	20398	22264	28788	12732	13189	20579	14209	15345	21251	11852	16904	16685	15022	24273	15941	15475	11359	12584	13706	13460	13018	20050	14402	15400	20948	17295	11563	13088	7330	22386	13302
1551	278	792	429	139	422	905	356	385	879	381	1908	283	1952	1288	1422	343	1241	509	519	3295	1676	300	581	1689	649	865	355	446	1043	1147	1069	1449	451	1117	798	1054	329	503	369	584	911	1724	1200	753	476	221	421	567	473
1552	257	127	82	-6	120	-35	10	20	411	50	365	11	419	222	328	116	405	70	205	841	316	-18	47	287	19	226	172	-89	35	248	264	339	260	405	257	419	210	186	202	56	146	385	171	14	62	10	30	125	14
1553	-219	-145	265	117	-6	343	-20	362	209	56	-155	136	-247	-255	107	-177	-192	74	-260	-304	-379	243	-104	-48	-245	-171	-769	-91	-163	-193	-210	122	-420	-10	2	188	-89	37	-75	-165	-95	-362	-147	-23	-47	-198	-81	-259	-560
1554	-166	-80	-133	-6	-69	14	-107	-11	-9	-32	-84	-28	-22	-62	-50	-57	50	-89	-39	-48	7	20	-100	-109	-94	-68	-79	-98	-11	-19	10	-57	-102	-15	-45	-48	-86	-50	-23	-50	-69	-10	-66	-51	-62	-113	5	-28	-86
1555	57	402	161	-82	291	225	16	-125	120	140	300	-54	175	212	228	184	55	-21	46	685	450	258	-32	404	158	159	-53	214	215	165	208	415	-29	356	134	312	262	278	258	59	409	421	277	264	67	296	251	374	211
1556	-130	0	-209	-80	58	-58	-166	-113	-111	-72	-61	12	44	-128	120	43	92	-70	4	61	96	-3	-167	-69	-80	-34	-175	-154	-127	27	2	-12	-138	97	-57	-14	21	76	43	38	-39	68	68	-79	-27	-239	155	-115	-96
1557	214	133	212	82	92	119	84	158	137	51	62	47	42	184	190	84	64	91	77	167	158	124	43	145	123	114	50	108	87	80	-2	126	199	133	163	78	106	51	83	93	31	98	86	36	107	169	88	132	50
1558	-73	160	260	-65	112	96	-112	-83	66	252	63	100	161	340	199	49	379	166	71	356	12	209	75	116	32	229	126	330	-106	29	313	74	7	67	103	-1	-15	-4	-21	95	149	58	136	273	64	43	139	48	100
1559	68	-20	7	-34	-17	96	-28	13	103	1	-17	96	57	70	25	-63	52	3	10	0	94	113	-45	-72	-9	-45	-95	108	-71	-42	191	-95	-82	62	103	148	40	14	37	43	-51	89	-47	88	-49	79	30	15	-88
1560	14	55	-17	-21	4	115	-65	-11	-28	-47	32	-56	-16	-42	43	14	64	-19	21	39	-17	24	11	60	-9	-16	-57	-33	10	37	8	-7	-37	14	-24	22	92	31	-12	8	38	-10	15	4	-7	66	-55	68	0
1561	731	946	1661	718	975	1331	1660	487	1047	977	1228	508	944	1281	913	890	2175	659	1116	2548	1709	1153	1189	626	947	500	973	497	2790	879	821	1711	1755	460	319	821	681	402	242	731	662	727	1339	761	853	988	299	1514	1526
1562	1125	829	1110	792	975	762	868	1066	1918	840	1206	395	1280	949	979	1116	1761	634	663	2188	1494	717	864	1171	871	1271	200	890	535	906	1006	1286	1051	756	1048	767	770	613	728	661	783	1122	990	1151	858	929	803	951	771
1563	71	0	88	-3	110	-17	-50	-44	0	42	23	-4	69	-13	70	38	136	97	-5	73	59	95	-30	35	24	83	78	24	58	47	-21	11	101	36	57	23	-12	44	81	34	67	95	59	38	12	-5	-30	144	12
1564	736	482	828	715	1406	229	541	83	691	593	745	192	1240	623	866	554	1796	571	277	1551	795	221	328	541	374	203	37	449	465	1048	579	1543	381	1130	374	1030	920	840	505	378	627	1350	1078	735	282	203	368	405	605
1565	-75	-30	-254	-73	-93	-39	-42	-277	-73	-141	-94	-48	-77	-55	56	-104	-119	-108	-102	-552	-101	-81	-136	-217	-52	-95	-104	-222	-90	-66	-27	-72	-138	-153	-146	-111	-157	36	-44	-158	-42	-41	-79	-148	-127	-306	-76	-247	-170
1566	-83	101	-63	-105	239	140	-122	-56	19	-131	35	-37	-202	138	31	66	60	-125	-50	139	53	69	-169	217	165	-132	-220	137	-77	41	300	-71	-178	78	124	-60	-105	37	201	37	-27	120	462	35	-124	15	203	-61	-52
1567	-169	-180	-497	5	212	-247	-184	-353	-313	-225	-179	-168	-79	-166	-41	-156	-292	-54	-208	-102	-209	-23	-193	-196	-85	5	-309	-415	-128	-201	-239	-29	-477	79	-9	-197	-295	82	-159	-167	-5	-50	-8	-209	-294	-38	-183	-67	-428
1568	-48	18	-253	-270	37	-97	-183	-113	-15	-94	-24	-53	-65	-76	66	-109	-162	340	-108	-13	19	-138	-115	-160	-24	-52	-292	-200	-26	-139	-197	-117	-310	21	-38	-83	76	138	-88	-130	-115	-14	-108	-155	-87	-43	43	-107	-221
1569	121	116	263	147	175	133	149	131	71	-37	76	43	57	144	86	104	-7	108	36	66	78	119	62	83	128	118	-34	127	121	4	25	163	7	59	91	23	97	31	-6	40	101	14	91	76	112	118	99	32	84
1570	443	389	443	509	35	437	640	185	494	493	358	441	175	260	305	315	215	312	263	474	229	422	379	75	356	166	530	333	278	-132	239	304	373	236	96	231	318	314	374	420	151	369	13	352	-92	260	188	297	60
1571	0	25	7	27	221	5	-154	-65	95	32	352	0	30	49	80	49	41	-13	-50	151	32	107	-32	13	17	-85	-23	-38	-23	110	-69	92	-199	26	28	-45	-54	76	32	221	34	126	239	21	32	-82	-68	93	-105
1572	1167	1083	2377	1128	1342	883	1282	500	2481	741	768	402	1929	1182	1561	1218	830	355	1003	2177	1724	230	338	1842	174	825	320	108	749	363	1483	2970	444	1203	617	469	165	600	211	100	161	1323	1203	479	544	260	584	446	228
1573	578	692	831	552	781	501	917	425	485	451	572	327	886	769	649	681	937	298	758	2162	660	306	511	804	370	301	671	366	382	432	615	1316	625	757	536	478	251	580	314	580	577	818	747	677	414	651	419	501	589
1574	108	71	-70	278	266	71	82	-67	130	38	73	34	176	121	166	148	106	4	135	361	97	86	24	281	31	63	-89	-9	61	-1	48	564	-42	162	16	65	64	177	-1	70	109	238	237	94	27	193	134	32	-21
1575	258	107	148	59	358	222	147	11	363	120	132	106	97	236	126	396	110	339	299	339	198	141	75	262	185	167	14	197	229	99	44	210	286	131	144	66	51	284	165	319	321	218	293	188	219	363	195	239	7
1576	418	377	299	561	607	574	994	221	637	440	464	373	508	527	410	553	301	244	310	900	610	298	250	612	284	332	251	432	582	329	233	939	518	590	701	397	195	529	361	388	370	549	572	272	344	435	96	536	149
1577	12	9	3	24	10	8	3	-31	10	15	39	22	-6	25	36	30	-57	2	16	33	14	-43	-15	50	-3	-26	15	-31	57	56	77	12	18	-18	-158	7	27	11	24	15	27	16	13	16	-24	-33	22	4	40
1578	-47	-40	-169	-173	63	-208	-171	-646	-124	113	72	-159	215	-44	102	91	45	99	50	338	29	27	-62	127	19	166	-48	7	-357	105	243	239	27	-53	-168	-13	163	25	32	55	197	152	202	-84	279	121	7	69	-45
1579	46	350	401	315	130	348	166	137	130	44	237	205	136	136	258	261	540	149	83	321	91	337	155	313	183	165	372	197	389	288	94	153	511	198	221	161	250	96	69	218	115	157	134	190	202	-43	152	162	182
1580	395	571	604	242	287	716	349	257	471	345	863	218	221	351	351	262	432	299	211	806	638	353	714	280	391	225	417	432	295	387	268	562	594	255	233	277	403	362	309	332	754	249	610	200	721	311	485	427	403
1581	-142	-150	-217	-143	-135	-104	-325	-236	-214	-68	-150	-79	-68	-142	-107	-106	-313	-22	-126	-83	-37	-221	-165	-127	-124	-160	-328	-226	-134	-81	-48	-73	-262	-106	9	-100	-145	-30	-86	-65	-98	-91	-48	-62	-4	-172	-22	-186	-290
1582	-95	-83	-109	-36	42	1	-28	-77	-256	-114	-62	34	-49	-179	2	-126	-49	-8	-94	-112	-33	-61	-239	16	-76	-19	-21	-74	16	-157	29	44	-45	-64	-76	-88	-122	-47	-40	-24	-38	-26	-54	-80	-49	28	-195	8	-161
1583	-110	97	188	26	30	56	109	-95	-129	30	180	-127	6	-83	13	-5	-340	32	-121	44	-103	-27	47	-41	155	22	239	-14	117	-8	-27	-39	-22	-100	-105	-77	3	128	-26	124	161	-81	50	-8	37	87	-25	60	185
1584	534	566	533	584	781	307	675	374	863	454	564	275	832	752	969	452	1070	556	361	1722	717	426	507	673	450	403	585	410	513	449	462	1685	531	511	319	394	437	235	343	469	618	895	874	306	419	458	437	478	334
1585	274	219	230	408	284	106	238	152	65	281	202	194	185	175	466	187	226	133	76	104	102	120	121	394	400	61	93	393	183	149	182	191	32	36	98	123	43	49	46	321	483	32	193	290	109	185	45	280	180
1586	101	350	119	47	116	140	131	128	107	129	187	143	76	139	124	96	379	97	44	157	152	143	182	81	110	135	253	-12	81	298	172	117	196	109	0	29	-13	90	60	90	235	211	144	252	112	87	35	93	134
1587	65	-63	44	84	139	-16	6	146	104	-28	-85	-132	103	-22	-23	68	-1	-2	14	-41	0	-130	7	52	-73	126	82	246	147	146	31	108	145	46	38	-65	-103	5	12	-38	125	-49	-38	39	-7	48	71	-68	173
1588	87	208	-20	-44	207	-48	-178	647	356	120	176	123	4	-14	173	254	-156	131	435	122	91	9	-41	47	578	304	-189	-24	-89	840	241	63	-129	21	834	25	-57	30	60	174	-157	-82	-15	203	-29	123	-198	125	322
1589	-73	-355	-550	-232	37	-58	-499	-208	-16	-79	-268	-367	-239	-125	-293	-322	-522	36	-21	-443	21	-455	-104	-246	-333	-281	-815	-236	-93	-293	-29	-133	-870	-17	-242	-11	-61	-192	-91	-165	-283	-75	-159	-203	-119	105	-172	236	-48
1590	-100	143	5	21	23	40	142	265	396	59	-68	24	150	-65	31	384	462	67	176	170	27	-94	188	210	244	118	-128	195	254	-193	121	186	320	81	180	-2	-235	-64	1	114	29	54	-193	28	117	146	104	412	382
1591	-55	-45	-155	-39	-84	224	18	-7	15	59	-26	-53	-4	-34	-86	-46	-129	43	60	7	48	3	87	-440	139	30	-65	-154	114	-55	-16	0	-105	-100	-108	-56	-44	27	-150	60	14	-63	-69	-99	-17	-43	-122	98	79
1592	702	419	799	527	960	346	813	475	771	93	289	66	436	1229	1021	91	457	233	159	685	450	249	486	1186	289	592	521	407	383	270	35	510	860	701	110	54	131	365	29	226	301	692	597	264	364	450	68	433	375
1593	-564	-318	-862	-676	14	-138	-504	-655	-410	-12	-435	-518	-194	-350	-373	-489	-1012	-616	-106	-452	-262	-1038	-153	-42	-514	-269	-1500	-789	626	-176	-56	-256	-1700	-169	-966	-312	-269	-95	-621	-283	-255	-8	-632	-438	-404	-450	-437	335	127
1594	-61	-99	102	-360	-116	94	89	-58	46	-208	57	-188	-180	257	78	94	-487	-15	-68	-697	108	-54	37	11	-18	201	-186	-62	133	-226	77	-72	113	-118	-233	-62	-159	-37	78	-224	-121	23	-323	23	139	-329	-129	230	173
1595	-449	-725	-1015	-372	-746	-220	-399	-356	-199	-570	-379	-536	-818	-695	-495	-581	-900	-678	-594	-233	-249	-716	-695	-628	-663	-730	-538	-697	-592	-723	-477	-598	-584	-485	-550	-412	-436	-384	-413	-445	-607	-610	-1002	-673	-389	-368	-516	-959	-981
1596	-56	-24	-88	-63	-10	-14	11	-80	3	15	-1	53	34	167	-22	-28	-65	58	-4	-45	-12	30	-3	-72	-15	-6	-7	-86	-117	-13	21	-10	-39	0	24	8	-78	4	-20	-49	-27	7	-5	-20	9	-46	7	-4	-72
1597	-176	-28	-60	-130	315	-334	-211	-143	-161	-231	-2	-369	-133	-297	191	24	-193	-43	86	-281	66	-136	-286	-14	-175	108	34	347	-355	-277	-117	41	571	-128	-100	-130	-187	14	-275	33	-7	-84	270	-158	-74	113	-147	208	-192
1598	-10	-13	58	-9	125	53	258	56	-15	61	14	103	17	138	-48	2	278	81	10	1	-6	60	157	0	49	-49	255	-171	174	-17	-71	-44	-24	48	16	-85	-68	64	38	0	-6	272	-91	-25	-47	-5	81	126	158
1599	44	0	91	38	79	74	-8	41	15	47	54	31	77	98	48	74	84	92	45	30	22	54	26	-3	44	91	37	152	80	38	16	104	86	-20	-60	-2	-8	-28	24	65	93	21	69	32	-12	69	35	161	36
1600	-22	-10	157	-13	69	-19	-77	10	-91	42	-47	-117	59	25	67	34	-27	172	-15	38	-87	-92	-150	279	32	-53	-62	173	115	1	0	11	-79	57	86	-34	-131	67	-4	4	145	9	13	-1	12	51	15	-7	26
1601	-557	-515	-378	-597	-132	-216	-613	-386	-417	-515	-309	-418	-287	-667	-318	-399	-317	-369	-114	-404	-137	-265	-205	-175	-284	-222	-715	-451	-207	-453	-489	-207	-772	-231	-127	-109	-354	-75	-128	-338	-218	-213	-339	-182	-277	-509	-218	-180	-605
1602	544	482	788	334	558	325	663	307	897	589	164	202	490	535	385	460	451	446	418	771	104	120	444	662	297	465	431	687	654	358	493	741	853	288	742	280	157	411	310	558	502	422	622	340	389	563	119	586	699
1603	-812	-994	-1370	-905	-371	-858	-910	-1071	-1020	-559	-633	-307	-529	-745	-313	-912	-580	-473	-544	-816	-322	-639	-786	-566	-453	-513	-226	-453	-748	-728	-399	-707	-877	-552	-528	-705	-258	-340	-671	-605	-770	-633	-303	-471	-594	-749	-302	-559	-651
1604	459	141	467	272	409	106	546	311	660	51	73	70	502	346	927	273	276	67	135	1520	244	122	163	1200	129	239	242	111	305	175	533	152	297	540	307	123	-74	218	433	72	126	768	327	162	144	206	10	128	88
1605	290	349	440	207	168	208	436	368	295	214	137	77	493	415	475	490	1192	286	213	1506	277	128	148	351	280	308	230	296	250	246	428	605	391	413	129	349	400	96	-20	141	218	423	257	138	112	368	137	133	149
1606	68	5	10	-67	-4	62	-26	79	1	-21	-11	53	21	23	14	21	125	45	-36	21	-42	1	26	-5	31	-16	-6	-89	10	-1	-14	-4	7	51	-76	87	8	10	6	-18	37	3	-2	-8	9	20	40	-53	2
1607	-19	-141	94	13	80	-176	426	257	229	171	5	74	-47	216	-226	268	-176	669	251	17	18	31	153	19	165	186	87	-461	17	-45	-287	150	-277	178	372	182	-312	-46	119	-81	137	-24	-83	273	152	95	7	-288	134
1608	-89	-299	-134	-352	-68	-293	-307	-253	-160	-227	20	-349	-146	-139	-92	-25	-403	-125	-127	-151	-77	-121	-252	-204	-266	319	-417	26	-366	-295	-6	-136	-76	-200	0	-139	-148	-210	-167	-182	-226	-249	-36	-163	-182	-242	-223	-257	-218
1609	377	219	248	189	285	152	262	356	197	161	132	90	268	249	217	224	436	252	115	453	23	273	117	167	165	313	98	86	166	223	147	555	363	92	120	216	161	150	81	120	343	174	292	256	94	154	167	181	45
1610	57	-43	-161	57	-28	30	84	88	108	31	-67	1	-78	21	34	-153	136	-58	6	59	72	71	34	-133	-21	-49	34	-26	58	106	-2	-34	-99	-4	-24	-84	-27	-85	-20	0	-97	20	41	-38	9	-92	-40	-10	-98
1611	91	137	195	52	224	167	186	146	186	70	176	84	209	209	93	137	211	260	53	430	51	-22	104	212	-39	-2	200	-55	58	38	157	317	202	93	151	-11	-68	18	49	61	51	172	223	24	87	87	94	-6	26
1612	348	259	333	699	241	176	702	608	241	214	175	140	260	337	515	779	429	216	495	119	347	364	277	209	389	417	337	473	257	188	239	702	361	241	-96	226	52	222	434	584	230	245	607	279	179	370	332	234	269
1613	342	653	169	644	-221	17	90	340	3	445	184	339	165	85	278	51	1116	46	413	561	393	77	623	-92	107	216	833	842	-654	301	371	156	1337	9	223	88	323	248	23	485	173	-126	497	392	471	249	274	42	170
1614	662	653	792	1034	832	327	680	1157	1067	471	524	523	727	883	701	569	1429	533	713	1665	590	899	436	1475	632	841	952	550	589	510	588	745	641	715	737	381	952	524	485	733	803	1284	1107	365	564	458	180	918	355
1615	-4	1134	232	55	1093	-56	272	376	100	194	29	646	711	355	745	393	590	932	1100	1950	301	1022	94	345	986	909	1056	864	269	879	395	907	1300	601	1124	367	150	347	198	478	651	283	913	1986	272	1027	978	1439	1033
1616	84	-21	-61	109	40	60	102	199	65	84	-65	-24	-6	37	25	38	185	67	5	84	-23	-13	113	38	-18	18	87	111	-58	16	-56	22	18	-36	-88	-149	-82	37	0	9	129	27	127	81	7	36	40	143	-48
1617	701	472	390	637	416	490	312	508	-21	692	503	349	741	494	630	705	841	418	650	753	419	-92	499	250	241	514	851	494	518	496	382	759	1179	519	269	404	406	412	334	423	643	549	469	500	541	759	632	449	144
1618	-79	-103	-103	-74	-37	37	-72	49	-119	-111	-33	56	-80	-71	-50	-151	-331	-47	-85	-180	19	-136	-159	-97	-42	-144	-378	-19	-89	-163	-126	-45	-195	-12	-146	0	72	24	57	-108	-158	-83	-67	-95	-169	-260	-27	-101	-151
1619	474	316	382	573	807	206	362	425	876	322	287	38	1165	671	458	632	982	492	371	1600	1380	149	172	763	99	699	436	188	579	517	506	905	673	455	437	478	477	479	303	149	277	923	1086	318	229	406	294	298	379
1620	317	181	607	511	269	334	421	277	498	108	405	158	274	252	152	419	644	296	338	410	266	427	229	410	55	311	652	533	396	30	187	340	888	234	468	364	318	213	210	216	315	153	376	273	274	723	149	427	257
1621	472	388	451	406	752	359	578	340	675	294	358	86	494	519	759	456	532	344	396	1153	737	49	328	588	156	281	261	236	245	272	355	816	274	530	211	320	129	245	218	161	179	859	577	194	237	195	322	240	175
1622	878	268	920	725	449	400	690	791	748	402	428	248	324	626	230	870	601	282	496	713	184	632	427	490	549	449	646	400	588	257	510	595	802	400	362	287	268	290	468	418	557	323	393	254	361	731	401	494	605
1623	74	14	106	-92	-13	124	-188	52	241	-20	340	-89	-5	-9	130	29	276	156	-5	161	6	-145	-15	52	211	15	-381	234	-58	157	4	-112	320	-54	45	4	43	23	-54	-23	55	70	79	1	167	56	38	17	-204
1624	235	135	364	388	111	245	388	349	202	199	147	201	123	222	201	132	56	141	250	146	208	122	151	180	215	104	68	111	171	136	176	182	-9	87	209	41	91	168	92	157	178	351	159	185	344	92	132	131	36
1625	841	761	846	699	834	499	890	571	995	584	1039	307	1146	916	779	605	955	437	822	3315	828	632	324	1181	408	653	599	449	589	634	920	1307	904	967	680	893	530	567	575	615	782	1467	1298	699	614	630	650	546	406
1626	-93	-74	-264	-150	-107	-199	-146	-136	-185	-41	-161	-97	-51	-129	-160	-138	-169	-103	-138	72	-19	-160	-159	-179	-95	-159	-294	28	-270	-85	-109	-8	-116	-72	-50	-176	-136	50	-111	-85	-133	-27	-91	-106	-187	-213	-35	-225	-182
1627	-2	-145	-23	-296	-13	-16	57	-115	-40	-84	-103	-160	-75	-21	-84	-49	-54	-34	-81	-284	52	5	-140	-104	-13	-55	-15	36	-42	-100	18	-19	21	-64	12	-80	-68	-20	-4	-34	-14	-176	-38	-104	-74	-20	-15	-52	-43
1628	350	495	937	310	278	88	547	836	457	21	391	87	24	573	198	216	135	546	318	689	43	128	119	325	275	340	345	386	193	294	153	126	510	164	403	180	174	339	-32	390	759	222	639	354	249	69	170	271	230
1629	84	43	76	3	46	14	132	179	7	57	38	35	4	41	0	1	5	8	38	10	78	48	53	26	-20	23	26	101	86	59	140	75	15	4	14	35	7	11	-26	29	25	71	68	66	-2	43	91	-86	62
1630	571	2893	2723	731	649	1858	280	1716	2388	913	2147	140	556	1483	1505	904	643	669	1137	3810	1631	857	813	899	223	759	899	837	180	273	575	603	763	770	439	579	444	570	853	1213	586	1235	1284	908	287	1009	310	12	218
1631	-49	-48	7	-53	-22	-39	-115	-572	-182	-64	-113	-91	-113	-95	-162	-33	21	-142	12	7	36	-52	-188	-104	-33	56	-183	212	-130	2	29	38	-65	67	-163	-99	-148	125	40	73	38	-64	-40	-4	-99	-18	10	-70	-93
1632	-30	25	57	11	-16	72	-20	-103	60	2	-17	109	66	181	-35	289	-87	64	133	-123	9	-41	39	32	21	65	-71	-120	502	-38	149	121	-4	31	43	-14	-105	-1	-7	5	-93	-61	19	-14	7	-103	40	215	31
1633	66	17	7	-10	-17	-1	10	259	-157	8	-172	-86	-52	96	-42	37	319	-46	102	75	21	109	39	69	55	28	211	-313	64	233	-8	95	239	31	-117	-100	-174	51	35	65	-53	76	10	25	-79	-41	-20	-172	76
1634	291	1276	660	955	396	451	756	883	246	562	21	-382	618	526	650	1415	1324	-136	659	2078	622	962	659	1066	611	925	414	1330	396	1020	550	200	537	734	562	576	246	762	335	690	777	1177	982	448	272	728	465	627	435
1635	-32	67	-27	9	87	-103	87	-44	51	71	31	-1	38	89	21	31	16	27	6	158	-6	-53	-62	78	4	-29	-89	-12	-17	24	6	81	17	28	-96	-20	13	28	12	81	33	19	156	31	37	-41	-45	-16	-57
1636	263	217	163	354	197	202	295	364	123	303	134	201	79	200	125	263	343	203	278	307	131	147	305	39	213	333	470	178	194	226	107	278	310	48	158	60	304	129	180	207	139	142	237	182	127	352	188	86	259
1637	-64	-84	51	29	-7	-58	10	41	-11	-15	6	-12	-23	24	-44	10	101	39	-30	3	4	-41	34	-117	-15	29	-162	-33	16	5	0	-5	17	-53	-88	-17	0	-25	-20	-25	-115	13	40	32	-24	0	-48	-87	38
1638	741	5605	1287	557	1132	714	1194	1145	1320	2693	1037	1365	1106	652	1258	1118	1506	1356	2167	2460	689	2432	444	1227	7647	4029	1380	3700	600	1504	691	1165	4317	277	898	323	7761	1804	3991	2450	713	1906	1643	1452	416	872	282	3030	807
1639	-13	61	-46	45	9	-7	57	73	-32	19	-21	-8	16	51	15	16	-49	20	25	52	38	-13	3	41	56	1	-65	-19	35	4	37	0	28	54	76	10	31	85	63	21	17	38	45	4	77	-84	2	-30	-24
1640	431	387	428	262	750	295	166	193	661	480	626	47	370	330	408	411	718	343	405	831	747	238	322	450	213	220	75	284	281	237	268	618	39	527	192	538	349	225	276	226	319	638	505	233	17	115	109	184	187
1641	1720	1127	1093	1599	1569	638	1925	877	1679	574	1191	2128	1696	1106	2065	1271	1536	678	762	1933	1049	789	813	2190	1038	1670	957	1052	418	1867	886	1973	2106	1590	478	784	1107	1594	1330	966	1759	4430	2688	2842	1505	860	1321	1089	764
1642	1610	3479	5013	501	1058	2521	161	2227	4727	2845	3048	941	849	1380	944	1883	-483	749	1301	2611	658	1633	1402	69	1704	995	117	700	393	3818	1552	1317	-344	680	2680	1289	869	642	795	1678	883	871	2034	1710	971	1068	1415	-630	519
1643	1011	578	1196	463	325	343	873	979	754	358	516	140	484	425	229	788	507	345	283	452	363	717	417	651	619	584	788	632	585	519	317	537	1186	128	497	327	200	316	457	426	327	257	387	309	244	406	541	596	396
1644	232	247	492	376	148	266	334	431	303	159	292	140	132	262	186	138	473	138	107	169	49	387	243	268	237	149	530	342	363	232	98	164	368	178	209	108	261	131	159	211	193	265	263	132	62	339	142	328	230
1645	116	18	132	40	56	83	68	64	166	-22	100	-5	34	1608	46	48	176	32	31	4	132	27	7	16	23	57	291	16	33	53	111	61	44	53	26	42	51	18	-4	47	122	39	48	200	47	72	73	54	52
1646	49	-113	101	-80	-66	-65	-28	-149	82	-141	-18	-34	-65	-9	-140	-31	-374	-121	135	-26	-16	44	-134	-66	-64	-48	-508	62	-80	-70	29	-165	-374	-129	-19	-56	-289	40	-54	-94	-113	-239	-37	2	-107	265	7	-80	-74
1647	73	7	180	19	16	62	-3	-11	45	16	54	-41	7	-57	-10	59	-49	28	23	31	52	73	11	14	504	-23	45	9	13	27	56	64	41	62	4	-157	-301	24	-23	2	58	29	62	4	22	18	35	-63	26
1648	394	310	764	122	231	300	-325	112	1012	626	318	-262	1171	-132	221	536	926	129	352	826	-29	-204	237	337	-323	190	765	492	-144	283	395	449	-461	464	134	472	315	613	388	374	-122	484	890	218	327	424	465	146	218
1649	417	502	433	304	451	193	194	328	499	144	550	109	379	374	367	301	342	199	209	963	558	185	343	394	183	210	161	210	155	312	311	683	163	256	180	246	283	290	216	255	491	409	622	425	182	95	180	181	67
1650	-94	-180	-85	-140	319	-99	-21	-244	-15	36	-89	-24	243	-51	175	28	-84	62	-56	174	-192	-99	-267	177	-53	5	-308	-84	-130	60	317	299	-162	258	-262	-287	-75	111	-150	-84	-93	226	326	-70	9	-337	-45	-145	-331
1651	77	133	42	68	195	87	78	76	134	59	261	27	144	128	71	182	84	190	129	174	227	150	-53	143	101	27	65	24	-2	182	-86	128	108	18	81	69	30	0	9	83	165	73	273	132	99	128	111	150	139
1652	549	56	622	-41	517	-12	374	322	425	-33	337	91	164	489	50	402	482	304	279	739	106	-122	-123	454	226	285	154	362	-64	474	350	421	-81	164	586	332	205	271	97	16	343	687	429	167	307	257	76	357	526
1653	16	-92	-112	-82	12	0	-73	-116	-83	-30	42	-47	-10	-76	-90	-72	-118	-33	0	-123	9	23	102	-137	-178	-10	-68	-258	-73	-129	84	9	-133	-97	-38	19	17	-67	23	-69	-46	-38	-54	-68	-69	-175	-124	-159	-55
1654	376	384	598	528	218	553	609	653	433	279	195	287	161	366	142	398	346	252	191	400	303	332	328	236	281	259	599	567	900	352	180	348	777	136	355	246	216	324	363	234	285	286	279	211	112	404	119	363	473
1655	76	-132	47	71	-45	-24	-55	-122	-245	108	-142	-89	59	-61	-71	208	-35	154	-32	-42	-48	-75	13	-1	-90	-29	31	-43	-155	-59	-18	-90	105	-36	-249	-74	-269	114	-68	-93	102	-6	-81	-94	-4	5	66	-74	-122
1656	-77	-19	-207	-215	-20	-136	-287	-26	-185	-105	95	-155	-40	-58	-116	35	-73	-38	-14	94	-48	-39	-146	-51	85	-40	-256	-168	-253	82	-35	7	-256	-183	687	-16	-310	31	15	45	91	-35	82	43	-27	-115	-91	-72	-79
1657	-127	-767	-938	-163	34	-83	-265	-1209	-243	-192	-197	-228	-101	-138	-185	-19	-710	-389	-132	-255	-274	-176	-108	-121	-372	-233	-865	-176	-923	-215	-260	-110	-478	-173	-661	-378	-190	-379	-358	-57	-67	-33	-132	-186	-751	-149	-142	-319	-372
1658	-847	-751	-840	-620	-53	-720	-848	-1304	98	-903	-616	-551	-250	-203	19	-406	-1324	-93	0	-929	-321	-827	-866	-542	-705	-274	-1534	-1677	-1430	-749	-334	-79	-1820	-585	-663	-1016	-2258	-763	-1149	-1009	-435	-1029	-507	-741	-317	-507	-599	-441	-1399
1659	250	205	270	211	73	144	215	262	171	160	111	107	166	197	113	270	252	193	97	292	87	257	273	156	192	212	444	337	165	99	166	168	373	142	19	-16	38	41	125	154	202	142	149	110	162	221	33	189	211
1660	-590	-259	-563	-1104	-126	-412	-888	-1197	-533	-329	-784	-435	-264	-280	-403	-363	-873	-776	-301	-9	-346	-443	-493	-513	-592	-342	-1653	-729	-1147	-973	-376	-721	-2068	-233	-682	-766	-393	-181	-241	136	-591	-533	-139	-512	-651	-981	-419	-645	-925
1661	1126	87	360	79	38	316	25	85	416	131	180	73	31	126	34	507	418	138	59	357	1316	-10	260	160	19	151	215	690	5	167	39	-7	230	114	245	1177	212	44	129	124	430	221	121	23	29	72	218	99	168
1662	127	111	95	49	68	28	53	122	115	2	147	22	20	81	71	15	71	-40	50	74	123	85	41	91	58	-16	70	4	76	45	-12	62	12	18	122	10	-71	41	4	46	50	48	117	35	-49	61	-50	-12	57
1663	175	103	95	9	76	76	5	38	72	71	77	73	41	62	46	81	214	62	67	152	-11	73	129	93	5	41	158	43	108	88	46	104	35	112	79	-7	-43	37	60	36	53	22	31	28	47	30	-15	28	88
1664	617	1471	1057	725	315	528	651	986	644	500	491	291	361	893	300	522	1007	504	391	502	359	427	524	362	362	341	624	671	446	428	378	437	1104	363	233	192	206	373	379	603	550	305	384	914	514	576	218	636	442
1665	-42	-114	-120	-192	-98	-172	-146	112	-359	-79	-299	-33	7	-141	-190	25	89	4	115	23	-176	-69	-283	-126	48	41	-78	-12	-262	125	256	-153	22	-153	-146	-93	-51	-38	-194	34	-130	36	188	-27	24	195	-94	-154	43
1666	148	85	272	68	66	51	107	218	153	14	115	56	82	80	41	142	120	68	83	53	73	167	77	94	10	69	111	205	152	176	170	83	138	28	290	48	38	80	12	25	93	27	80	89	124	141	58	108	305
1667	-232	-113	-273	-165	-102	-147	-117	-313	-301	-236	-129	-126	-96	-192	-63	-189	-355	-76	-111	-172	-51	-239	-125	-67	-155	-287	-151	-185	-137	-127	-187	-120	-156	-120	-158	-96	-336	-69	-119	-106	-137	-66	-114	-99	-144	-115	-22	-123	-48
1668	-711	-249	-1430	-638	-447	-567	-917	-890	-1231	-432	-321	-346	-257	-604	-717	-303	-447	-763	-412	178	-208	-649	-632	-666	-626	-621	-1638	-907	-455	-569	-336	-687	-1069	-471	-45	-391	-466	210	-443	-251	-393	-606	-236	-369	-424	-414	-297	-994	-394
1669	707	138	555	351	342	108	235	409	420	76	63	27	236	54	51	248	173	186	181	525	149	71	176	315	214	239	442	166	43	247	136	347	370	25	98	142	261	108	26	143	274	149	365	279	269	262	221	677	168
1670	690	373	156	599	616	140	1712	1161	322	169	1105	219	843	268	589	327	331	271	1187	1511	1331	724	237	1897	302	507	397	480	346	476	212	1312	311	510	382	314	604	281	114	293	531	1994	545	359	584	198	205	228	214
1671	-112	-129	-28	-31	-21	-24	-45	-32	-15	-16	-66	-12	-57	-31	3	-45	-90	-28	-18	-57	-49	-188	-58	-20	-72	-53	-81	-106	-17	-52	-98	-38	-81	56	12	-176	-119	-4	26	-1	-26	-22	-15	0	9	-103	-2	-73	-38
1672	36	28	159	13	103	35	-18	-43	183	113	165	-8	6	68	21	17	3	98	2	15	-57	-35	-74	-26	-86	-89	-53	14	-74	-34	-25	-36	-81	65	-43	-19	-34	47	15	-9	-69	37	62	126	7	-77	-111	-24	-62
1673	1768	1189	2088	2045	900	983	2651	1191	1136	1076	1079	780	836	1328	872	1411	1706	1193	877	1700	1492	1301	412	2231	828	891	2023	1612	1250	833	914	936	2601	1150	894	773	555	788	835	748	1066	1035	921	678	1093	1066	930	1175	1106
1674	5418	17348	6156	7070	9017	6221	4746	7881	9431	5092	6027	15280	6183	13077	8506	3720	12676	9783	4453	13988	2900	6074	3729	6023	13278	4718	4110	6288	3412	10245	6421	10431	3219	4639	8790	5841	9981	10026	6574	8020	8259	8556	11688	14938	6448	5598	6456	12406	7855
1675	80	244	-23	359	-71	216	411	62	245	-152	-94	83	227	-110	-122	44	51	4	-16	-188	269	-10	146	129	-133	-82	-48	301	368	-251	105	-24	-14	-170	4	10	-52	50	184	331	-66	-234	129	-28	384	-36	-129	22	276
1676	-171	-206	-192	-255	-135	-28	-196	-305	-115	-164	-117	-136	-128	-50	-172	-136	-126	-220	-124	-236	-92	-163	-121	-32	-176	-110	-280	-181	-172	-283	-174	-133	-299	-87	-81	-142	-252	-112	-92	-104	-191	-205	-230	-87	-179	-247	-165	-159	-175
1677	14913	14924	19777	14619	14573	10619	14650	17011	15050	9423	15490	9183	12586	16065	13228	14483	16101	4215	11163	16819	17227	11360	10052	15896	7078	8793	13124	7794	9013	13379	11063	16017	11629	11175	9545	9870	6069	6802	8171	8332	12692	14383	14028	12819	7858	9349	10541	9205	10726
1678	124	31	-31	33	51	-168	3	-32	52	30	-32	-12	-11	59	-30	-43	-41	48	-4	123	-4	47	1	20	53	-12	46	-45	-7	6	100	-18	-7	36	21	-109	-185	8	-29	12	-26	14	38	10	-69	72	2	-80	-108
1679	-97	15	103	33	-30	28	-154	46	-11	-30	24	-38	-43	0	-15	-9	-60	-15	-20	-21	-31	39	0	71	-5	4	76	41	2	-27	-140	-20	11	15	-16	-50	-69	-64	-1	28	-58	-9	-9	31	-49	-82	40	18	79
1680	179	72	400	103	114	5	47	209	-50	20	59	-14	-2	94	31	-11	-125	53	29	88	283	124	148	210	126	151	39	164	33	158	94	68	-78	78	-14	-259	-297	70	66	-35	66	-7	55	65	59	72	7	-57	153
1681	-552	-526	-1312	-820	-446	-531	-799	-787	-605	-698	-482	-438	-485	-501	-437	-628	-336	-423	-475	-490	-356	-476	-461	-524	-426	-533	-876	-451	-755	-402	-388	-913	-1049	-413	-237	-950	-1228	-332	-365	-600	-526	-535	-597	-474	-162	-499	-396	-616	-565
1682	94	-14	125	-19	9	-24	-107	38	52	85	21	-4	-61	101	-39	24	-32	10	42	-96	-37	98	45	-40	80	31	48	-84	64	27	37	-28	199	-12	38	-41	-32	64	7	-9	-25	81	-21	-57	-19	-110	5	-46	28
1683	291	441	321	660	689	60	253	218	197	6495	118	-24	1663	347	49	112	1016	185	143	631	1886	11	98	799	7344	263	212	125	443	211	821	8546	185	543	1454	99	7840	869	131	65	109	957	695	17	636	404	930	182	55
1684	179	54	21	119	-29	94	36	53	-64	128	42	54	105	0	43	46	117	134	100	93	116	159	414	-80	208	169	165	197	-322	100	37	100	387	23	420	257	122	155	80	71	186	109	134	-76	174	141	12	209	122
1685	3282	1627	2783	1544	1896	2372	613	4066	1391	972	780	2433	9811	257	6270	6845	1234	-135	7686	10926	1830	219	807	1628	2790	5455	2495	8700	4614	4357	7369	7216	6603	1487	7540	8791	12307	5433	1644	1671	1327	5653	4830	-28	1595	4537	7480	454	2
1686	389	265	494	575	141	257	196	343	43	270	260	301	70	311	163	221	61	23	312	206	139	304	283	329	294	268	240	779	508	239	231	246	256	264	-4	217	301	218	346	129	134	212	144	223	159	262	315	393	353
1687	-308	127	-348	-57	92	-113	-119	-367	-271	2	-182	-136	-21	-33	-42	42	-288	59	56	74	16	-206	-91	75	-5	75	-122	-111	-57	-22	4	25	-74	106	52	80	133	-20	-7	23	77	67	71	13	-29	77	-33	90	-12
1688	69	82	172	161	52	-44	57	113	62	-241	56	-51	1	89	58	87	134	42	-56	146	74	180	55	76	103	124	323	301	-338	141	-2	-248	243	95	4	-2	71	8	60	44	85	63	138	39	79	249	71	-353	254
1689	-179	-283	-353	-248	-97	-279	-490	-851	-283	-80	-182	-179	84	-287	3	-80	-492	-121	-162	-46	-94	-201	-180	-217	-170	6	-331	-156	-633	-482	-229	-23	-349	-65	-362	-171	-91	-79	-256	-45	-33	-117	-27	-4	-172	-211	-94	-207	-262
1690	710	394	376	756	803	506	341	1716	464	932	803	827	632	269	228	273	305	72	230	1155	11	1027	220	531	1376	163	538	1035	414	1222	117	354	475	89	254	120	1358	463	343	492	322	1106	2682	113	2	203	213	579	339
1691	-338	-500	-834	-93	-501	-312	-720	-484	-385	-138	-401	-224	-281	-457	-319	-256	-753	-219	-137	-232	192	-347	-218	-462	-255	-153	-636	-127	-467	-181	115	-153	-260	-360	-117	-160	-47	-181	-207	-372	-321	-287	-165	-107	-112	38	-411	-184	-276
1692	0	372	587	-33	349	-92	-84	-652	430	295	247	17	29	269	276	100	200	330	31	310	-46	-94	-62	193	380	-156	-356	36	-581	468	-39	112	-387	-67	235	151	213	199	-68	307	226	394	354	242	-12	-103	287	-273	-353
1693	1080	4490	214	114	89	115	77	128	163	85	-103	1136	92	92	116	271	492	3386	791	103	123	69	75	-59	6644	530	4554	67	5381	114	2479	-83	320	1	1829	-84	-221	109	1208	430	847	419	85	137	-27	162	-99	225	153
1694	723	9456	19653	-190	95	7978	-270	1289	16572	21880	6008	612	282	14079	433	4811	7932	969	319	6259	356	-28	3894	139	2572	342	-276	137	1316	265	1094	141	72	-82	134	69	47	210	694	9515	2514	33	4555	2464	47	782	-33	970	682
1695	304	278	486	214	201	131	220	104	279	179	209	179	115	174	176	436	-165	184	320	246	264	175	313	88	329	200	264	487	222	217	191	239	334	118	141	201	268	140	95	185	197	194	234	148	274	365	188	385	329
1696	240	194	355	297	117	87	154	289	177	102	71	139	44	201	91	176	107	146	141	89	62	181	151	208	97	137	231	217	27	175	142	69	239	78	187	84	34	60	97	105	95	45	140	186	52	208	78	238	216
1697	488	638	690	588	687	439	534	227	740	797	443	462	681	646	810	1295	420	435	1193	1797	715	367	801	697	574	988	777	1081	229	304	762	669	750	604	641	822	534	580	787	556	547	882	868	590	589	605	378	700	526
1698	-203	-231	-244	-533	-96	85	-267	302	-362	-275	-269	-238	-152	-103	-287	-213	491	-38	-156	-294	-394	-295	-364	-361	-337	-146	231	321	705	-276	-174	-190	682	-324	86	-203	-428	-255	106	-163	-207	-384	-177	-141	-149	-149	-147	-126	-295
1699	89	29	63	-82	80	-7	45	23	106	99	14	12	66	333	-12	36	149	43	-4	105	-2	75	9	75	16	79	-18	-65	120	8	56	86	64	-20	19	41	34	101	58	43	111	-33	47	128	-32	38	-58	303	129
1700	2149	1870	3234	2192	2172	1625	2409	1152	3796	1507	3109	829	1711	1866	2262	1466	3123	901	870	3566	1215	881	1417	3018	1658	1354	976	999	1430	1288	1107	1590	1192	1563	1096	1506	896	918	1058	638	1275	3425	1789	769	961	903	803	1633	1315
1701	385	131	498	267	250	167	85	349	208	314	284	125	176	145	176	302	181	165	55	95	465	311	174	166	441	290	317	333	256	152	71	301	407	84	62	211	258	166	126	189	314	276	233	110	67	309	244	224	189
1702	-136	44	30	-34	37	-24	-194	17	-10	7	-64	51	-28	54	25	-136	-31	-41	32	-29	-159	-2	-32	-2	76	-10	4	-120	143	60	123	26	-68	-70	-72	-115	-48	-154	-92	-49	-31	60	-131	-17	-174	-128	7	111	141
1703	1136	494	643	638	669	234	243	499	957	493	388	494	440	690	833	952	-193	437	483	4103	34	307	359	196	1236	597	715	381	-581	1142	1428	434	552	275	266	297	216	1311	529	957	557	740	2018	1065	284	187	747	-120	-158
1704	3221	10954	16529	5364	2837	16135	6067	3103	15235	8982	8630	1695	4765	3529	9000	10227	8469	2091	2273	12217	2973	1743	12805	5981	2425	3323	2617	4142	1462	2208	3681	7756	4813	4714	3922	1850	4662	2931	3765	1826	2694	9487	5149	1365	2506	3777	5104	911	2551
1705	343	286	540	76	427	-97	-136	-314	143	370	270	133	-4	55	137	-217	133	353	53	610	338	307	273	135	396	168	-158	96	46	156	115	577	670	-23	28	26	-20	295	163	415	465	446	446	109	149	97	216	61	-81
1706	-190	-231	-320	-182	-115	-261	-238	-187	-176	-44	-229	-122	-173	-306	-153	-248	-48	-180	-134	-212	-72	-214	-214	-328	-253	-189	-297	-393	-81	-192	-149	-177	-370	-31	-163	-151	-138	-60	-103	-140	-245	-113	-149	-204	-242	-368	-76	-294	-259
1707	14108	12913	16066	15496	15002	16775	17770	14010	16467	17688	17068	19078	13783	16001	14792	15912	9278	15967	17911	14520	3070	16169	17279	15575	15883	15301	16951	12229	15423	13773	14888	15725	15956	16093	13756	13158	15244	13721	17228	17659	15169	15722	15454	18332	22530	12854	8167	16149	17757
1708	303	329	419	381	313	261	-65	-14	-528	-74	153	228	261	162	21	97	-205	480	285	691	157	256	70	140	36	369	599	96	-77	-42	229	382	-112	234	810	109	-1	161	326	1	78	357	526	213	107	-180	-63	266	62
1709	-475	-654	-572	-676	-280	-414	-613	-901	-673	-471	-111	-349	-286	-506	-247	-394	-493	-385	-383	-507	-199	-275	-621	-462	-338	-470	-927	-547	-371	-507	-378	-513	-420	-176	-396	-250	-408	-265	-324	-334	-555	-407	-353	-303	-369	-551	-172	-231	-322
1710	339	329	711	375	379	286	438	409	572	446	343	171	349	365	331	427	335	274	474	691	232	211	362	425	510	290	398	417	445	1288	420	789	71	438	1247	367	193	477	430	266	265	559	503	183	361	378	320	481	415
1711	613	185	240	54	35	167	-28	74	206	121	91	149	324	128	218	38	411	187	272	396	465	108	37	412	340	425	37	289	232	-41	353	195	255	32	-86	277	297	160	133	3	267	-67	26	76	169	180	127	573	492
1712	18	-39	-116	-13	-6	-40	36	-38	-10	26	-55	44	-25	-69	50	-8	-54	-109	77	44	116	68	-62	-139	-10	-123	240	98	-43	-16	107	74	323	40	-38	192	155	4	7	-28	-77	-6	-49	55	-74	72	27	-42	40
1713	217	71	152	53	48	136	60	140	136	85	156	119	41	89	105	70	294	43	51	140	-29	44	136	60	123	-50	9	224	20	73	60	97	153	4	120	146	170	59	133	99	38	169	30	2	72	118	114	41	197
1714	211	84	197	137	105	55	62	152	184	245	143	205	187	173	133	459	201	169	204	282	94	27	220	126	180	221	46	140	218	127	197	224	75	122	120	315	284	99	51	204	170	130	130	166	107	239	109	306	281
1715	26	72	58	67	37	35	18	34	73	119	21	64	83	86	78	93	121	165	117	133	26	-6	-13	-32	-4	211	352	125	115	170	12	27	370	46	14	32	76	-4	46	81	146	88	130	36	27	151	63	78	105
1716	-449	-127	-87	-316	-141	-14	-238	-368	-157	-45	-195	-239	6	-108	-143	-137	-170	-149	-125	-21	-139	56	-20	-159	-100	-110	-270	-120	-183	-138	-96	-37	-233	12	-170	108	-180	-150	-74	-48	-22	64	-51	-51	-104	-92	-30	-111	-62
1717	434	307	343	460	170	330	299	376	437	332	152	257	275	479	81	260	400	257	222	167	146	226	463	98	129	318	281	294	240	229	344	212	579	164	129	299	244	199	95	136	321	250	140	253	244	486	172	117	108
1718	-289	-386	-390	-411	-171	-85	-352	-470	-80	-200	-68	-194	-102	-47	-287	-280	-5	-206	-365	-800	-84	-115	-288	-59	-253	-217	-230	-352	142	-402	-268	-286	-192	-237	338	-250	-125	-306	-117	30	-190	-345	-80	-2	-314	-200	-167	-533	-19
1719	685	1629	1545	1434	2539	684	717	218	1762	1134	1138	1395	1167	513	2792	1019	702	1778	432	1252	3441	330	807	1733	794	402	899	407	471	174	594	1203	514	1532	514	776	2858	525	1045	382	1089	2217	1692	545	756	584	139	392	682
1720	-667	-687	-1102	-463	-194	-650	-974	-598	-778	-612	-515	-346	-427	-566	-403	-384	-1077	-339	-571	-410	-547	-714	-737	-381	-572	-455	-879	-120	-792	-345	-378	-410	-1082	-192	-377	-247	-456	-18	-479	-159	-309	-383	-262	-332	-369	-419	-401	-500	-644
1721	147	238	161	221	483	101	139	130	342	117	487	112	478	230	279	244	575	110	285	724	211	139	119	239	149	109	64	-98	251	175	203	673	98	198	307	182	230	290	47	92	131	367	604	204	64	66	99	174	151
1722	-65	-16	-120	-74	-92	-90	-105	-280	-110	-201	-114	33	-77	-104	-60	-111	-376	-96	-178	-212	-1	-137	-131	-81	-178	-34	-120	-118	-30	-161	-189	-190	-175	18	-127	-143	-145	-41	-57	-63	-111	-58	-87	-168	-134	-280	-35	-129	-149
1723	-106	80	82	2058	2673	-99	-16	-467	-70	83	14	104	912	-47	1008	22	-75	-160	36	553	39	2167	138	-53	56	-43	-117	-144	-163	752	-65	460	-360	6759	1084	-240	-337	-125	-249	-170	103	6228	294	39	354	-87	416	386	19
1724	54	76	114	412	173	145	-15	178	271	86	0	40	227	103	-42	221	42	268	124	-104	157	472	226	217	48	169	291	323	-74	-60	212	284	152	-76	185	137	-9	116	17	100	294	80	255	-38	54	108	-55	275	180
1725	-44	52	-116	70	151	-14	18	-38	-46	16	-3	191	-4	14	35	-34	1214	10	76	-49	33	-3	24	15	161	37	20	-48	46	63	163	132	-2	48	129	51	120	10	21	3	-22	128	57	-10	12	54	38	305	238
1726	-21	-41	-54	39	18	-81	-70	-28	-70	-12	-8	-8	1	2	-41	-37	10	-9	-6	-52	-62	-14	3	-71	-20	-28	32	-62	33	-17	-132	-39	42	-15	28	-32	-30	-27	-7	-26	1	-5	-52	-28	-62	-90	22	-4	-52
1727	63	43	148	-55	41	-37	-144	-13	24	134	-24	-54	71	-13	36	31	77	60	7	339	47	18	24	17	108	164	109	108	103	134	-8	13	-9	-50	-98	8	-40	95	40	105	87	76	176	2	-112	247	96	-2	-81
1728	1864	1293	2951	965	618	1746	1458	1509	3170	1321	1843	1233	1899	2107	673	788	1507	594	1066	1524	1271	962	1968	1024	853	1894	1506	861	1847	1193	920	2344	1272	918	1435	913	1505	1208	400	1556	1613	1501	2185	1516	716	1148	1685	852	1060
1729	575	285	547	367	228	288	450	367	354	359	277	275	402	264	203	234	479	176	138	333	243	333	246	342	283	228	447	120	393	295	134	402	453	86	192	308	97	177	109	246	379	308	314	185	322	321	205	294	360
1730	31	0	-115	-267	167	-12	-21	-382	63	119	-97	-182	53	0	-163	-80	-140	19	-149	430	-53	-166	-83	-401	-235	461	-702	-289	-19	98	256	-27	217	-67	52	77	1	114	-156	101	94	252	-173	-46	292	139	101	-4	98
1731	831	327	558	521	309	531	1053	694	537	408	212	317	152	479	287	305	533	1523	294	201	348	418	412	426	295	317	422	328	525	241	311	331	735	197	636	216	156	347	368	434	347	164	540	280	354	453	566	552	740
1732	1491	845	1354	819	1209	967	947	698	1588	859	784	768	1055	1265	1369	938	1167	634	813	3497	1069	589	963	1310	687	1004	611	984	1166	1265	838	1365	849	1149	826	1125	648	1074	578	724	1331	1327	888	981	699	1539	782	1415	1000
1733	989	759	1614	1246	434	1100	1196	959	1760	1274	705	405	2144	743	1389	420	775	1264	824	1013	392	656	777	1001	842	974	707	716	462	1822	937	2967	279	1559	1901	1332	1141	1286	634	416	795	1129	749	434	1148	1223	1748	983	1089
1734	83	54	60	-15	77	28	-6	56	14	37	70	12	131	119	61	58	74	70	30	148	61	32	28	130	4	15	17	-19	24	31	14	160	69	82	96	26	51	18	7	1	126	51	94	34	-7	-74	5	40	36
1735	-157	-156	-72	-100	-125	-119	77	-77	-229	-14	-190	-123	-42	-138	-19	-319	380	-91	-130	-199	-99	-155	-81	1	-27	173	-345	-19	-92	-152	-44	-75	-149	-189	-146	-173	-303	30	-4	80	-102	-143	-58	-13	19	33	-10	29	-40
1736	-403	-985	-743	-554	-628	-309	-388	-1482	-1023	-82	-803	-356	-375	-835	-226	-838	-464	-653	-624	-861	-261	-448	-944	-690	-630	-519	-700	-963	-1064	-17	-308	-1059	-518	-250	-346	-1526	-687	-125	-99	-277	-645	-285	-754	-137	-312	-592	-592	-1014	-829
1737	926	1646	1724	1407	1346	1477	1371	404	1891	1083	3407	1007	911	1467	1895	979	677	1294	977	2625	2020	672	1020	1829	659	759	693	861	1049	1392	668	2096	957	1399	1223	1187	1075	1328	1022	1981	1653	2378	2982	1105	534	319	477	1413	949
1738	-109	-99	-189	-110	-87	-206	-107	-167	-231	-100	-171	-132	-102	-122	-128	-124	-290	-157	-92	-159	-176	-143	-153	-126	-311	-134	-100	-166	-262	-66	-220	-142	-145	-73	-163	-754	-1648	-116	-41	-111	-115	-88	-186	-95	-174	-208	-58	-164	-163
1739	479	430	934	186	344	590	147	139	1016	154	831	145	931	606	1025	137	582	561	221	545	1371	73	653	761	269	232	258	147	152	468	355	841	611	741	374	-139	-1461	98	176	-77	303	534	183	-39	114	442	368	-69	141
1740	362	851	688	143	437	184	149	172	796	280	572	122	600	384	794	346	324	119	144	1769	1621	452	341	679	644	180	200	284	155	265	195	1024	183	458	122	-16	-1062	358	275	318	422	771	602	336	67	131	172	138	257
1741	66	119	130	154	60	46	26	112	51	-19	89	-11	33	146	27	70	82	59	89	-68	91	95	37	69	20	41	107	140	17	27	605	92	112	81	98	-94	-247	116	64	39	135	113	7	27	-12	46	122	3	64
1742	215	-81	135	74	91	99	72	154	37	73	-64	34	113	8	92	159	0	198	123	-198	-81	155	203	183	-55	31	62	236	183	-107	256	204	188	100	60	23	65	145	112	62	137	21	50	102	64	244	147	209	218
1743	-958	-944	-1334	-876	-621	-732	-988	-1302	-969	-654	-687	-357	-612	-837	-553	-687	-351	-464	-286	-955	-438	-639	-841	-671	-745	-567	-1475	-750	-426	-623	-453	-646	-1685	-530	-394	-474	-505	-566	-357	-626	-683	-814	-651	-483	-713	-754	-493	-820	-815
1744	392	502	371	232	73	138	181	401	276	227	463	191	157	249	151	196	382	231	241	362	222	211	144	134	270	266	381	287	216	128	174	221	321	89	100	103	54	102	61	158	898	113	197	540	154	247	127	254	153
1745	365	624	108	873	686	302	325	244	273	144	34	399	281	589	854	289	534	540	44	616	447	239	9	515	50	268	483	164	797	265	313	178	390	491	223	252	87	173	426	190	406	462	505	1448	217	185	147	1674	735
1746	3079	10455	9378	1493	4742	8842	1063	-250	11741	12546	12682	3545	2459	2484	1709	5862	10698	642	9145	1085	708	-31	6562	2211	8156	8025	-794	7126	3706	3903	4509	2049	6682	2611	2966	5070	2615	1976	1834	3328	6633	10888	3433	5533	1031	66	5706	2037	1587
1747	410	198	569	392	217	270	430	463	317	305	223	152	260	323	227	442	483	311	281	288	249	402	353	435	382	460	455	453	367	230	168	382	558	162	281	7	-18	166	157	158	330	75	322	286	242	365	116	425	322
1748	-83	-101	-130	-105	-80	-58	-11	-64	-87	-37	-27	-90	-83	-78	-21	-142	-101	-60	-37	-102	-19	-40	-62	-58	6	-48	-132	55	-30	-45	-63	-66	-89	-7	9	-151	-245	70	-68	-92	-62	-71	-11	-62	-77	-177	-27	-88	-33
1749	793	230	950	305	292	380	813	694	427	452	341	99	268	257	208	383	832	499	494	396	209	453	212	389	299	684	779	931	310	721	651	355	890	212	312	398	301	252	431	512	502	282	549	230	264	599	294	819	755
1750	414	-223	-199	-205	170	81	865	-988	-88	-240	-303	76	-123	265	-45	11	-350	74	101	52	308	18	273	-259	109	78	-715	0	-200	-94	388	-108	-269	219	-103	31	-115	-115	-46	94	65	209	-81	-44	-147	-203	91	359	226
1751	-390	-840	-391	-828	-337	-293	-413	-1040	-477	-611	-312	-268	-395	-287	-205	-340	-1136	204	-488	-427	-307	-357	-334	-603	-112	-664	-1021	-222	-1323	-710	-149	-599	-636	-311	-516	-483	-987	-215	-156	-418	-681	-483	-478	-549	-356	-651	-266	-519	-793
1752	203	185	367	246	497	64	231	215	318	202	116	24	314	346	253	78	335	58	189	476	287	112	121	395	230	215	176	190	142	142	222	304	253	195	204	72	140	219	123	106	154	388	445	162	254	234	83	249	141
1753	-84	-67	-11	213	342	-19	126	-103	-36	-64	-94	-30	61	21	118	109	-74	-1	30	1	77	15	-37	-11	-5	76	-62	-14	-68	-23	4	15	-48	200	31	35	-32	121	131	-57	-66	180	29	99	69	-105	96	-20	-122
1754	114	-27	-4	49	-12	49	36	26	43	10	1	35	51	68	24	-2	120	-1	39	22	-9	-13	0	68	60	57	25	57	42	11	6	33	24	42	72	14	3	57	46	74	82	13	137	13	2	-123	-5	63	-9
1755	87	59	54	-26	87	-39	30	-23	23	-45	7	28	-14	21	58	-95	86	121	16	127	-17	64	-26	106	78	160	-68	156	39	85	96	60	-11	45	100	-83	-94	-24	-85	90	87	21	239	24	-7	128	10	256	26
1756	128	128	189	8	116	124	225	91	127	82	86	61	110	68	71	179	130	83	56	84	162	134	115	209	154	143	230	149	178	55	250	98	193	20	122	74	134	92	55	95	119	59	103	9	82	56	142	64	122
1757	-270	-24	-143	-114	-83	44	-122	-109	-160	-154	-111	-70	-109	-144	-60	-125	-134	-147	-121	-69	-11	-132	-127	-75	-117	-112	10	-190	-117	-70	-96	-114	-240	-23	74	-7	-26	-36	-85	-87	-151	-27	-57	13	-134	-28	-88	-83	-168
1758	253	-9	269	-153	-49	-165	-73	-136	37	14	-66	86	-327	102	-94	-260	-191	-248	32	-126	63	-26	89	75	-59	282	-214	-33	352	-85	130	142	195	10	216	-103	-129	85	-154	-128	-277	-121	-108	-73	-84	154	-27	322	139
1759	70	40	85	-39	15	21	45	89	24	6	24	35	204	14	138	246	53	36	352	439	387	57	112	7	112	58	217	33	89	35	182	192	178	37	173	32	23	59	103	23	110	69	119	53	34	126	22	-49	9
1760	293	233	398	474	102	334	421	124	294	246	232	245	219	318	316	275	196	301	307	338	374	231	113	266	190	300	251	345	376	264	289	481	511	148	379	191	251	229	218	260	359	195	434	429	536	517	50	423	250
1761	-81	-329	-502	-396	-373	16	-18	158	-473	184	-117	-109	-118	-39	-69	-24	450	95	-33	-576	-146	-366	-421	-83	-149	-94	198	-410	-105	-15	-149	-116	287	17	48	-7	-114	-95	-204	-16	-123	65	-30	-38	-37	-187	-35	-391	-420
1762	-45	-197	-126	-231	124	-179	-62	-116	26	-47	107	-94	-87	-83	-105	-105	-134	27	-32	-214	-27	81	81	-52	-153	-59	-228	181	166	-33	132	-87	-129	-122	-216	-85	-43	-37	-74	-16	17	-85	-32	-133	-54	46	-27	26	-48
1763	14223	17650	21798	15790	15470	29496	18805	17175	17827	21874	17789	25622	18530	14919	17499	19987	15084	23352	14423	14836	20840	10036	21444	18546	16072	14954	12987	27495	10723	20812	10944	18163	18928	16383	23712	21110	13661	19203	24451	15229	17962	19052	17351	22852	8483	10706	17305	13905	13424
1764	371	133	216	372	179	231	248	427	332	184	304	11	320	254	232	411	247	237	248	343	1	342	288	349	269	258	6	415	464	373	603	361	47	89	146	96	-27	86	269	184	157	484	271	166	314	538	-27	419	125
1765	20663	23952	21873	23052	22863	27994	19901	26804	19765	28033	25524	28619	21474	23810	23891	25393	22141	26440	23297	15232	24694	23086	27159	23082	26232	23625	28296	18486	25880	17117	23838	21619	25946	29601	21650	24142	26524	20935	26742	22775	19809	25139	22899	18359	26762	30173	14788	23046	25310
1766	14744	16712	16731	17036	16806	23456	16959	18213	16113	20922	19733	25213	18877	17723	16858	17858	15040	20832	20221	12945	17086	18918	22274	17151	19906	18341	23498	13566	23159	21466	28736	15850	21651	25335	28810	20811	19288	22230	25683	19598	18947	17611	16519	19955	31500	31216	24041	18291	27470
1767	17748	21825	16891	19994	17680	19997	18972	15780	22225	21794	20866	22066	17259	22061	20365	21277	17557	23019	21412	19285	29485	17540	21018	19389	22679	20717	24399	15087	18982	16934	22279	19196	21626	19983	16364	17342	21999	12072	18551	19460	19195	20170	17392	12999	22236	19109	11606	22002	18847
1768	21	83	47	-58	32	16	8	59	27	-13	-6	-21	10	-10	67	-18	155	40	-6	121	87	78	45	-17	31	32	-7	60	-20	-29	14	43	-48	57	60	-72	-99	37	64	90	79	83	110	21	12	-36	180	16	45
1769	-68	-147	-216	-161	-91	3	-57	-122	-45	-39	107	21	-12	-127	31	-135	-234	-45	3	0	-141	-205	34	-177	-142	-160	-75	-142	-112	1	60	-241	-198	-40	197	-19	-30	-99	-89	-36	-79	-196	-3	-80	-79	-272	-71	-76	-214
1770	-27	25	7	-5	2	71	-33	143	-11	-10	12	-25	-21	64	31	-17	-55	115	-42	0	51	15	-17	-34	51	20	3	31	4	16	115	1	-32	-18	43	-17	-4	-15	-20	-19	25	19	-34	-17	-14	-15	-58	-16	0
1771	-7	30	-60	-173	-13	-128	-72	-241	-26	-177	7	589	152	-68	15	-81	576	-60	465	-127	-159	113	-207	-73	292	444	-25	-74	-180	-27	39	471	-38	-9	543	-136	604	-27	13	-65	45	71	544	-40	97	10	307	-164	-26
1772	-746	-598	-992	-885	-551	-645	-737	-1039	-680	-299	-532	-346	-328	-669	-504	-282	-885	-277	-327	-672	-361	-646	-602	-566	-525	-502	-873	-451	-449	-453	-214	-308	-819	-273	-461	-274	-540	-346	-156	-273	-361	-592	-219	-412	-277	-378	-254	-365	-634
1773	615	244	677	358	835	227	280	946	515	400	240	129	475	360	670	363	1108	416	212	462	3929	903	277	331	409	559	531	407	424	206	588	438	743	162	240	191	149	160	242	240	867	432	616	1475	669	1359	55	750	500
1774	1317	1266	1849	1156	706	1081	1534	535	1145	983	1031	855	1083	954	723	1063	1633	928	771	621	638	1437	1088	514	1310	670	1868	854	1128	-179	371	1075	2424	356	57	456	53	277	618	270	917	161	402	573	786	1277	754	1859	1173
1775	6284	14069	13354	10677	15517	6638	7852	7432	16358	9850	9459	3904	11615	7290	14695	11916	14838	14417	6941	16627	3575	11049	9888	10929	6534	10243	8759	5870	7440	5996	7176	11195	9701	8097	4228	5130	5604	5111	10216	5639	7605	16319	13570	12764	8897	5268	8319	7372	4453
1776	152	106	86	56	95	55	70	128	80	99	57	10	58	32	41	79	89	106	-4	35	38	32	20	112	78	62	-10	21	43	-9	10	24	151	34	21	-5	102	-17	-21	86	58	18	49	88	-14	162	15	27	67
1777	-63	0	-307	-95	-67	7	-84	-83	-22	-118	-131	-44	-92	-52	-25	-159	-118	-112	-99	-63	-44	-164	-1	-157	-150	-89	31	-313	-71	-30	-138	-69	-64	34	72	-60	-41	-24	52	-30	43	-22	-45	-77	4	-146	-78	-119	-72
1778	2810	5085	4601	3740	5879	2692	3137	2794	6235	4938	4055	2010	3427	4459	5142	3911	5052	1995	3632	8612	1585	2364	2365	5018	2456	2734	2296	1808	2538	2737	4087	3390	2369	3312	2266	3159	2767	2419	3223	1915	2479	5980	6569	2994	3467	1928	1888	3747	2308
1779	56	-29	-109	-62	938	88	-78	-257	-35	392	16	1452	22	93	333	3562	1441	184	478	379	-64	51	-36	59	135	196	-93	490	-49	989	706	199	1293	18	1213	-60	-146	-30	917	-139	311	87	777	-113	2269	296	2681	6960	15791
1780	520	2171	646	371	1267	215	287	250	978	2404	2362	373	738	436	742	431	744	643	496	2581	1371	1947	271	969	3499	1163	779	939	235	1758	418	903	901	521	805	281	1412	1162	1072	899	1815	1220	1796	1152	277	484	472	1877	415
1781	-41	-662	-550	71	-347	-216	23	-215	-923	-663	-395	-43	-312	-472	-388	-422	-352	-415	-547	10	96	-17	-68	-93	-450	-403	-164	-700	46	-915	-500	-758	-202	-375	-423	-422	-471	-190	-275	-487	-639	-781	-566	-463	-404	51	-371	117	226
1782	329	205	475	316	205	325	347	326	261	235	242	273	250	256	206	197	281	254	247	269	221	223	300	351	283	251	350	434	139	247	86	223	430	37	276	183	189	160	140	253	265	162	234	164	247	386	114	359	336
1783	-232	-81	-165	-175	-105	-80	-215	-257	-322	-260	-176	-109	-156	-120	-233	-179	-462	-66	-128	-219	-82	-294	-74	-66	-184	-276	-497	-371	-80	-165	-174	-275	-390	-87	-180	-149	-60	-96	-159	-167	-190	-157	-190	-177	-222	-218	-312	-144	-283
1784	1563	1007	2144	1558	973	1621	1169	1241	5812	1231	580	814	860	2278	919	1094	1102	681	649	792	236	969	976	940	721	715	902	473	846	800	550	976	864	352	829	83	358	616	270	969	591	576	452	882	1061	1233	683	1528	981
1785	1120	1331	1669	1050	1981	519	966	562	1611	1969	690	832	1688	1211	2217	1975	1053	1297	1481	5812	2263	757	664	1041	942	1567	713	1124	767	956	1584	2682	904	1327	1026	1048	478	628	805	591	1594	2272	2363	1234	1095	741	1009	932	697
1786	-213	-100	-41	-222	-96	-206	-317	-347	-210	-160	-198	-133	-50	-189	-30	-79	-178	-76	-126	-141	41	-248	-275	-119	-75	-104	-386	-149	-86	-160	-166	-58	-331	-106	-199	-78	-195	24	-97	-85	-102	-76	-107	-107	-69	72	-63	-232	-293
1787	205	176	87	187	254	-16	47	176	346	239	1468	340	539	93	1062	109	160	106	176	1203	633	502	77	666	78	256	15	161	32	730	229	630	115	932	586	-80	323	281	66	168	107	168	281	173	159	108	388	172	79
1788	197	100	269	24	65	85	168	139	77	123	73	56	97	170	79	133	89	116	108	197	157	27	178	69	103	72	428	214	137	124	-71	122	253	70	-19	-38	99	118	66	161	218	132	95	102	92	141	12	250	125
1789	-90	74	-157	-103	45	-17	-89	-145	-54	-10	73	64	77	-80	-17	69	-250	169	56	-49	19	-11	245	4	60	5	-64	193	-17	26	-94	-19	58	18	0	146	161	164	13	143	38	103	228	14	77	169	48	-91	-96
1790	957	1357	796	1856	2698	969	1920	812	1789	992	524	651	1633	1376	2784	1438	1275	1426	1493	3982	3390	377	590	2173	427	543	941	340	2127	506	1790	2852	448	2252	978	520	519	352	516	266	595	2671	934	805	1852	870	571	1516	1238
1791	189	205	367	-4	119	42	194	155	138	90	143	15	191	85	100	192	94	162	64	187	19	2	207	220	118	111	206	207	136	228	332	170	230	68	112	51	-117	99	-21	70	219	104	210	114	92	25	116	384	105
1792	-11	59	-31	11	41	35	28	-64	12	60	7	60	58	11	11	90	228	55	-37	68	56	-11	77	-16	-33	33	56	-21	51	62	132	20	-88	56	69	118	619	1	86	94	93	82	95	-4	67	18	38	9	117
1793	96	2580	418	-241	145	-49	102	446	541	309	348	919	270	182	105	154	884	283	309	1027	659	434	0	17	2780	985	-39	371	250	562	521	35	-21	29	55	444	3003	316	863	880	49	249	970	1522	294	61	165	468	26
1794	-242	-339	-401	-393	-240	-352	-396	-385	-234	-76	-326	-194	-319	-103	-180	-183	-553	-243	-195	-339	-429	-312	-340	-520	-266	-119	-547	-547	-333	-319	-258	89	-414	-399	-461	-509	-406	-99	-250	-165	-522	-245	-190	-197	-274	-306	-226	-258	-444
1795	-790	-567	-867	-902	-243	-787	-1045	-1121	-545	-224	-443	-491	-530	-554	-412	-436	-1191	-786	-476	-575	-406	-515	-507	-865	-466	-835	-1312	-1460	-954	-724	-35	-402	-1612	-477	-824	-886	-648	-395	-414	-482	-567	-796	-900	-342	-511	-937	-587	-297	-988
1796	506	142	335	220	372	174	230	854	259	235	262	139	279	263	235	369	304	454	118	357	222	126	216	324	633	394	248	400	229	634	640	351	494	303	608	315	555	336	284	281	339	204	436	178	257	352	216	298	759
1797	-178	-49	-107	-260	-94	-113	-147	-238	-99	-71	-131	-113	-109	-120	-68	-178	-173	-100	-100	-66	-76	-116	-210	-152	-56	-122	-208	-84	-307	-102	-88	9	-179	-89	-40	-160	-156	-88	-44	-103	-87	-54	-67	-72	-69	-149	-111	-148	-204
1798	147	1858	862	-50	1023	848	-299	-131	976	1099	99	2233	95	1654	77	129	-391	100	222	363	-14	-173	556	156	-76	400	79	934	-251	2780	256	149	122	787	17840	825	262	213	1786	2530	843	4698	1076	2206	4820	10094	8866	414	4
1799	-236	-150	-173	-252	-46	-369	-327	-395	-213	-205	-186	-194	-245	-179	-133	-179	277	-206	-151	-92	-52	-205	-89	-234	-166	-66	-395	-190	-282	-351	-126	-21	-346	-106	105	-161	-160	-31	-239	-169	-18	-96	-119	-128	-309	-298	-226	-224	-298
1800	148	276	378	73	361	160	154	649	327	130	-50	107	215	82	311	120	246	214	-82	154	-114	253	112	247	214	252	120	9	55	110	16	279	245	-59	-28	-13	60	92	134	145	423	297	566	337	72	236	12	930	293
1801	283	752	517	313	590	355	243	568	732	512	851	234	613	436	433	319	1503	382	559	894	520	465	488	590	419	235	384	545	81	577	266	541	313	295	358	292	360	233	298	758	881	993	1008	971	289	448	106	1217	254
1802	6312	4497	1397	7723	10675	1657	6601	2223	2593	2776	796	5458	8259	4217	11103	9569	11403	1535	7217	12317	-61	7434	528	7251	4692	6827	2722	6387	1878	3113	13617	9346	5390	9337	7328	6617	7014	7495	6098	5597	4620	10515	8445	8146	9913	10181	10922	7642	4881
1803	-52	49	150	-56	62	12	28	100	37	21	36	-5	-52	15	59	49	-94	-35	-2	34	14	56	36	45	41	3	86	-98	103	13	31	-46	-5	46	-33	69	-53	57	13	-8	-50	24	27	68	59	-38	-33	-1	-69
1804	1716	2421	3334	2284	3467	1435	1330	1895	3791	2337	3387	1158	1918	2747	3257	2795	2525	1517	2120	6651	6084	2078	1662	3034	1789	1720	1351	963	1453	1419	1857	3438	1524	1901	754	1562	1687	453	1519	1008	1919	2727	2398	1418	1375	1030	1138	1642	1344
1805	-442	132	-44	-101	123	-24	-312	238	-417	171	-532	0	225	120	175	316	220	-166	202	220	94	-154	-254	-307	-303	300	136	-494	-319	174	25	252	259	139	76	-56	153	-44	-221	179	-39	153	-137	87	247	-229	139	-225	-141
1806	-96	50	366	-188	45	-492	-191	-242	19	128	6	-130	104	-89	-63	50	248	264	77	-12	-177	-73	-26	57	41	118	-23	557	-629	1	-195	-33	283	151	-600	137	-35	-332	37	-450	275	-26	124	-399	-284	-440	25	-206	-305
1807	178	336	345	374	321	44	359	364	333	271	267	-12	268	-40	64	160	363	333	279	117	152	265	-47	392	305	330	64	2	363	199	235	302	404	9	69	38	165	-8	30	263	339	140	351	222	194	46	-195	405	327
1808	75	53	-234	152	30	117	42	22	-116	184	79	86	-115	-40	-126	230	43	-30	124	2821	39	215	127	-61	67	-133	67	24	70	114	187	143	294	57	141	197	142	98	94	149	74	87	-21	122	164	123	116	-84	-84
1809	272	11799	182	11	89	94	-20	202	8426	269	103	24	61	8582	117	45	99	982	172	184	53	75	93	51	121	84	195	125	137	58	-113	79	123	76	-7	57	-63	154	-37	176	206	56	591	10145	84	123	71	39	-79
1810	893	622	1180	657	504	524	984	881	758	683	581	524	529	775	458	486	590	578	580	670	319	655	501	687	557	574	890	605	815	694	498	562	953	374	677	504	672	444	603	516	503	641	736	408	414	798	640	704	920
1811	1461	2610	-618	-605	1984	-1424	327	256	1434	1603	821	-740	-657	-1557	-945	-863	616	-679	-797	810	-622	-198	-1472	-314	1102	-430	281	-1277	-2034	2241	195	-265	-784	763	84	1108	1229	311	453	-684	113	1615	2541	-802	-17	-357	-803	-95	-360
1812	158	317	448	403	73	7	95	491	330	169	176	109	75	138	80	137	74	118	108	207	-302	168	220	169	162	131	330	255	245	76	-27	226	425	-3	103	-31	-91	67	134	97	146	190	36	77	192	172	76	255	223
1813	-454	680	-966	-926	-314	-428	-102	370	-370	-399	-143	-258	-60	-322	-278	-175	-187	-87	-156	-322	-14	-461	402	4	-155	-237	-744	-178	-23	-41	-77	-213	-688	302	-60	-265	3	-89	283	-37	-137	-266	-94	2206	-109	-226	-254	-302	86
1814	411	217	621	306	230	240	257	421	193	131	144	122	212	260	175	211	429	245	89	335	107	215	353	149	177	196	460	407	262	91	170	348	376	126	-26	-760	-970	95	44	92	359	134	171	220	109	378	58	381	305
1815	-100	-196	-213	-298	-180	-78	-203	-440	-73	-115	-172	-205	-105	-119	-78	-119	-212	-106	-153	-256	-254	-100	-34	-232	-56	-185	-345	-135	-168	-189	-172	-246	-343	-136	-302	-302	-566	-67	-60	-143	-197	-212	-161	-126	-102	-169	-144	-160	-367
1816	-228	-183	-311	-166	-143	-216	-268	-287	-209	-207	-199	-127	-195	-156	-119	-156	-218	-188	-92	-242	-113	-240	-218	-277	-105	-225	-322	-342	-174	-160	-214	-226	-363	-158	-149	-259	-335	-72	-119	-218	-259	-198	-254	-197	-67	-381	10	-385	-245
1817	135	153	108	-47	107	-617	-171	455	-25	-285	56	31	19	106	-137	246	605	187	223	220	-189	143	-322	17	196	70	-910	729	-203	42	424	289	-699	-10	48	100	-24	173	-165	8	247	-58	73	392	164	298	-190	893	538
1818	1683	1359	1890	2409	3099	1002	1900	1628	2016	2969	1960	1589	3023	3430	3388	2250	5159	2067	1756	7085	5634	919	1166	3983	4728	2121	2400	745	2649	1638	2807	4558	2636	2548	1735	886	4389	1248	1308	727	910	4752	2415	423	2256	1568	566	1634	1647
1819	417	275	161	225	150	104	117	436	205	198	200	133	179	323	106	63	602	160	232	49	84	185	163	166	369	195	411	12	250	253	123	192	505	219	14	-169	-272	163	111	242	277	54	259	95	172	206	228	56	211
1820	106	-101	-119	-55	28	-113	-181	136	-105	-96	-37	370	540	-70	11	481	-98	-42	208	-80	103	-172	3	-81	2366	86	45	-12	-46	1349	-58	39	-101	40	69	447	-30	321	55	59	186	-56	-26	-65	19	95	20	-163	-96
1821	1235	639	1520	1154	534	1068	764	1815	736	1289	480	947	431	927	695	871	1462	504	612	806	1030	570	1048	995	1263	970	1320	762	1077	547	546	505	1632	623	435	638	676	498	952	801	789	818	449	596	671	1122	592	1224	1144
1822	704	4107	1010	905	2204	828	793	509	1721	952	1055	787	1647	1389	2337	1118	1980	3069	999	3065	719	844	782	1062	801	797	483	135	458	895	1122	1369	462	1606	937	932	1718	1061	1096	1088	1182	2551	2232	1132	823	468	1342	771	646
1823	-370	21	-1	-236	470	147	-260	-20	691	543	309	-126	283	189	453	232	-281	279	444	627	302	-218	106	8	-126	-55	-312	-383	-153	190	107	528	-106	457	-24	268	174	151	-23	-58	-313	382	91	-80	224	-23	-119	-212	-233
1824	552	131	-288	336	677	-26	349	305	-129	-26	-72	44	279	484	994	529	983	10	368	1194	103	-35	20	785	336	793	-53	453	445	420	525	373	329	792	442	819	233	301	335	173	27	788	366	312	481	571	259	607	245
1825	625	1594	1257	1122	2318	830	660	538	2175	1237	1528	827	859	2067	1998	982	1500	1790	695	2264	3610	604	824	1895	1023	955	341	873	718	806	956	1484	1005	1139	677	889	970	577	988	488	765	2298	1061	1120	776	767	462	1295	632
1826	275	557	585	244	941	195	278	344	734	402	504	148	330	452	335	286	309	159	258	882	338	133	328	602	276	225	276	144	191	389	214	431	357	225	233	274	318	184	171	259	441	391	503	249	112	260	81	305	223
1827	474	339	650	613	873	332	552	239	770	705	110	201	1465	990	915	484	1040	241	452	1872	409	-88	229	899	281	624	618	642	569	548	371	1149	793	403	259	492	317	480	443	264	439	1034	1290	227	604	932	447	309	286
1828	332	1754	588	161	543	378	260	-53	1397	393	523	573	355	378	218	385	22	92	-178	330	68	962	423	449	1073	651	-305	417	1436	89	-403	282	192	217	-96	275	281	366	281	307	415	352	453	491	-32	43	-94	951	1346
1829	330	811	212	584	1018	206	655	-187	1176	100	164	446	196	1216	664	295	1080	327	228	1475	449	130	131	534	271	305	251	-178	30	207	367	361	256	597	648	699	601	776	631	182	265	1021	456	528	374	239	343	2501	1885
1830	369	379	578	487	436	232	485	443	699	304	338	123	863	148	1026	471	488	416	482	498	167	351	511	742	214	402	528	159	746	442	558	1851	396	439	288	295	218	739	310	293	447	452	335	256	304	350	945	408	396
1831	424	609	214	245	559	58	176	182	409	154	179	91	359	334	273	431	892	836	255	471	369	58	9	276	141	187	186	84	156	424	218	436	259	147	235	169	187	99	196	352	233	717	584	607	127	208	2	238	233
1832	277	358	175	246	677	64	297	332	520	358	592	153	603	393	435	468	829	254	384	916	133	251	193	407	138	295	101	246	238	446	453	452	226	201	153	327	482	219	177	165	626	696	951	437	282	234	134	198	45
1833	471	282	424	319	498	193	378	359	442	146	372	117	357	262	354	372	304	184	335	626	318	204	113	525	206	249	201	202	285	141	271	604	129	280	213	292	205	75	179	173	297	340	504	234	119	236	193	206	201
1834	261	101	309	288	395	58	84	251	155	167	140	287	152	145	81	202	286	141	155	180	139	124	108	102	203	128	84	168	244	154	287	222	390	73	88	128	117	37	111	130	230	74	252	247	159	252	122	1450	781
1835	775	553	1199	688	798	718	625	1200	1207	573	437	620	782	1819	361	433	652	521	378	1240	754	525	693	529	511	313	669	514	1111	1057	357	784	1010	324	463	415	760	427	379	785	593	1162	1902	479	604	419	416	727	620
1836	162	39	-52	503	654	3	445	-95	216	-67	-98	235	475	28	1167	55	572	181	711	1728	484	159	-32	1180	194	325	-167	130	-105	370	155	1174	89	552	204	182	334	580	54	126	151	940	1256	-40	189	115	437	63	-43
1837	272	-25	183	515	419	87	505	262	214	73	-19	-35	302	294	446	547	124	190	415	779	643	13	72	578	132	147	159	57	225	116	189	436	1	402	163	169	48	95	278	89	95	534	366	354	104	-36	129	121	-7
1838	-73	-369	-131	-204	-56	-272	-547	-548	-13	-193	61	-152	-86	-179	-230	-50	-836	-68	-217	-1419	-547	-179	-123	-144	-324	-18	-1525	-308	-529	69	-147	-266	-1648	-108	-411	47	119	49	-163	-58	37	-1171	90	-252	-164	-404	5	-455	-353
1839	9459	6073	12044	10292	12619	8241	7522	5162	14825	12022	11496	6711	7346	12217	13437	11935	6735	12231	15891	15987	17810	7746	9529	11729	6823	11032	10450	7925	7016	6355	9519	14338	8758	10369	6129	6777	7565	5805	10640	9539	10687	14473	14582	6468	7908	6246	3047	10453	6052
1840	107	-32	111	-249	32	-158	139	-151	61	100	139	-102	88	-58	-28	157	-102	118	161	112	88	129	-91	14	-50	83	114	159	-156	-30	168	160	198	53	-180	-23	208	-92	34	80	107	86	182	114	82	110	61	135	127
1841	16944	14183	19370	20411	19924	19403	16666	19283	19459	23122	20742	15345	18349	20225	18596	22066	14005	24724	25926	17601	22233	21143	19002	18221	17281	21408	25800	20417	17509	20975	21877	18472	23118	27668	29721	23279	20815	23048	27841	22269	20507	22780	19639	24548	25559	20327	15439	19381	17933
1842	1306	948	1884	1145	881	768	2075	1239	1086	1015	578	412	930	625	422	1238	613	1195	1440	2661	820	872	685	1072	1150	1198	1693	2464	322	1450	987	1245	2853	511	600	609	419	912	468	930	1321	838	1095	580	836	1145	749	1472	1149
1843	-65	97	145	144	5	176	189	43	237	27	-2	38	-4	139	-1	141	18	16	108	28	39	-11	218	160	33	-21	192	94	180	-8	29	196	311	76	28	45	54	-1	95	157	9	141	81	107	74	149	-12	144	-12
1844	28	22	-20	0	19	-1	120	86	55	-1	8	-8	8	-39	-19	56	16	72	54	3	9	-30	-22	104	-18	-80	9	171	87	59	134	53	108	-23	67	-66	-41	30	17	29	55	109	1	-2	-29	121	35	-15	-7
1845	166	-416	-167	-1071	5	-693	-1253	-1739	1338	338	-179	-104	338	-1142	-262	19	-2399	-167	-104	-1538	86	-210	-1164	196	-224	421	-956	-1277	-723	341	533	41	-512	-25	40	541	-290	106	337	57	-59	-529	122	-24	24	66	-414	-861	-363
1846	-173	-156	-312	-242	-77	-211	-206	-319	-245	-154	-246	-191	-125	-116	-290	-230	-493	-128	-274	-565	-144	-109	-254	-131	-181	-333	-298	74	-125	-344	-42	-235	-237	-541	-372	-455	-658	-280	-949	-107	-117	-548	-386	8	-247	-36	-124	-336	81
1847	444	1243	642	1028	223	579	280	1455	575	701	393	290	170	428	321	371	833	231	331	730	727	41	440	1286	713	241	292	161	2001	192	792	902	1024	115	536	5	506	30	-55	100	206	687	152	299	-69	507	373	872	1043
1848	126	156	78	79	-42	96	107	223	90	64	-28	11	-15	18	18	133	-107	130	18	44	-16	125	144	128	48	95	262	-28	20	23	18	-40	368	73	173	120	25	20	95	57	41	27	21	4	-49	141	81	-7	-12
1849	441	237	525	287	199	291	688	1001	479	252	310	171	127	298	176	352	234	332	357	507	216	470	490	306	503	367	647	461	385	1031	365	305	555	148	908	203	122	382	221	179	318	176	257	283	144	445	223	393	661
1850	43	160	346	89	16	-94	25	83	321	96	124	51	70	116	-12	-15	375	110	20	1309	42	119	81	13	348	112	78	164	21	174	479	119	229	39	93	-72	51	72	94	128	182	0	152	43	-9	133	78	-56	144
1851	-1091	-735	-1398	-974	-237	-638	-667	-1620	-819	-519	-415	-475	-559	-523	-217	-283	412	-663	-23	636	-73	-857	-609	-283	-406	-382	-951	-683	-385	-713	-178	-462	-648	-109	-408	71	-375	46	-392	-304	-758	-333	-562	-322	-371	-618	-510	-731	-726
1852	5	56	-53	17	61	8	23	-59	0	24	32	4	-2	27	23	22	-111	20	41	57	43	-13	55	200	-31	40	46	43	-5	16	189	20	98	-73	-69	14	21	41	-29	11	29	66	23	21	-39	-128	-101	28	33
1853	-96	122	36	260	67	179	-137	44	-36	-59	63	56	73	-14	237	-13	-295	-41	-143	167	214	23	53	131	23	27	-153	-299	7	2	-117	51	-155	195	98	11	-36	77	-63	66	90	216	197	160	-102	-393	-88	-44	-76
1854	355	128	384	224	251	62	292	367	200	96	152	160	219	66	73	237	37	245	261	224	89	180	138	204	106	232	233	323	257	106	170	254	470	136	362	-11	49	98	26	189	175	153	168	197	112	435	10	84	115
1855	376	184	683	414	335	432	453	484	457	297	259	301	289	359	229	221	771	144	249	169	122	589	459	358	249	249	312	340	314	413	117	348	212	128	170	194	423	134	174	167	325	344	189	186	139	296	116	364	379
1856	670	8521	3569	466	523	1322	848	1964	3371	1308	738	1465	195	2823	1159	990	15848	409	441	660	156	-49	117	268	1089	1496	320	-84	267	262	6089	548	940	40	644	158	-87	-12	-4	1695	874	601	3199	2662	299	1040	472	1916	1644
1857	257	159	112	126	185	42	104	28	135	54	52	113	162	154	89	219	261	99	110	-11	66	86	-22	68	59	203	339	308	-42	153	128	11	41	26	370	4	126	73	100	143	267	73	102	152	74	18	30	322	134
1858	139	24	68	85	80	17	58	32	113	66	103	12	79	62	28	32	88	-16	36	79	76	60	66	123	-17	30	45	60	13	11	-42	59	1	7	69	-13	-52	37	29	39	69	37	44	77	-19	12	15	15	2
1859	139	87	109	11	63	7	38	121	12	66	-22	80	94	1	67	275	-16	277	-9	80	-23	109	102	123	88	99	-100	149	73	51	65	81	170	43	7	35	31	56	541	156	127	17	58	103	47	84	38	56	28
1860	265	21	240	297	287	80	107	199	221	95	175	-20	236	127	260	55	152	294	123	171	132	126	140	191	10	66	125	50	111	147	147	340	122	289	213	247	132	24	17	16	127	133	62	-6	234	87	101	23	165
1861	119	74	45	73	119	71	28	79	128	49	116	103	56	89	38	70	49	125	65	-12	9	26	-20	95	150	59	86	72	120	100	100	54	32	76	86	8	49	-24	30	52	129	48	97	59	59	28	-43	23	-24
1862	274	343	128	385	212	264	23	128	607	297	137	334	-69	332	111	444	334	-7	242	318	304	145	340	103	401	212	291	-135	11	194	174	439	-222	-78	293	-109	176	184	304	258	119	100	344	153	202	108	251	458	620
1863	40	192	7	-58	119	-5	-94	17	5	-19	7	-11	-23	-6	-11	-95	-50	1	-18	-53	-46	2	24	-18	-58	-36	21	-2	14	31	722	18	-45	57	31	-84	-2	50	-4	85	23	6	26	166	2	-79	-20	371	-100
1864	64	76	281	100	72	-8	21	136	51	210	137	84	46	40	22	99	97	152	84	-52	144	146	134	224	17	57	226	246	24	135	44	85	272	112	156	191	97	-27	32	102	99	47	139	153	7	206	-43	139	129
1865	-308	-124	-457	-383	-210	-106	-411	-230	-235	-176	-51	-390	-179	79	-300	39	-630	232	-132	-386	-8	-173	-165	-252	-292	-363	-580	-354	105	-16	-84	-382	-1112	-67	-19	-19	-31	142	-244	-105	122	-213	61	282	-414	-301	-299	-322	-50
1866	-17	32	2	-27	-29	23	-52	74	12	8	34	-17	3	21	-1	23	-47	-4	-13	17	24	13	5	-44	-32	29	28	-28	48	6	-23	5	-4	-6	-43	-77	-83	43	20	23	26	-5	44	-12	-27	-15	17	-21	2
1867	723	297	455	326	166	380	253	815	259	316	148	176	297	475	97	301	417	338	205	375	349	317	300	242	352	335	499	477	563	302	258	420	933	206	399	326	346	319	343	251	386	191	323	264	354	705	246	493	495
1868	-272	-194	-79	-300	-157	-202	-253	-272	-130	352	-184	349	-106	-169	-190	-264	-6	-143	-202	-256	-154	-129	-138	-32	-219	68	-438	453	-70	6365	50	-183	-514	5483	49432	1403	199	1290	3409	2179	746	8615	3376	24	25374	25276	51900	760	-194
1869	-135	-48	-142	75	-87	-80	220	-50	-87	-24	-63	-79	-55	-57	-3	-42	0	-21	-19	-10	-38	-53	-5	323	-97	-28	35	-106	-102	15	-10	-49	-35	14	-45	25	-18	34	-38	-66	-53	281	-36	-83	-49	-15	22	86	-139
1870	-61	121	-33	170	168	337	283	0	408	57	195	238	305	344	282	100	115	26	136	507	144	-32	277	125	-16	59	-225	405	273	305	195	166	-121	-122	146	74	-154	1	-134	-62	73	352	-68	46	-12	123	33	352	153
1871	395	315	512	355	239	455	604	608	330	196	336	314	265	263	260	379	647	277	346	328	223	402	419	346	367	321	389	458	439	194	264	322	723	228	358	210	287	272	241	269	302	223	264	268	249	440	287	516	428
1872	6594	10565	6969	2606	2716	3769	4891	7652	7799	4216	8740	4291	5386	4006	4326	4891	10093	4957	3131	13156	11336	6327	4443	4840	9570	8893	4047	6406	5197	7521	3650	5654	9769	2794	2629	3959	6855	3182	3486	5400	5760	5837	7997	3853	2673	3334	1408	7102	5076
1873	236	167	323	177	-70	-48	99	-71	195	144	180	183	175	133	70	212	348	135	108	136	-151	139	203	-1	169	158	-104	316	-54	20	71	3	-277	48	-84	-87	234	-41	7	21	115	118	67	96	117	139	203	73	168
1874	391	287	158	-280	81	53	411	259	419	187	-73	120	185	62	110	149	222	273	92	293	134	160	24	-70	131	-122	12	168	521	320	92	163	-34	93	115	81	29	105	0	4	113	381	71	-54	32	180	-223	343	283
1875	-85	128	-29	109	-42	-33	13	34	-36	-44	43	20	-53	21	-5	-36	86	-39	-59	-123	89	-36	-62	-104	-67	-56	-183	-94	165	30	-46	-55	-21	-46	177	20	170	-1	0	-90	-57	-17	-113	46	-12	56	55	48	151
1876	-1173	-278	-2052	-2066	-409	-1522	-2051	-2025	-1013	-539	-1146	-1076	-397	-1382	-276	-963	-1860	-672	-734	-779	-492	-1489	-1012	-570	-381	-629	-930	-801	-1636	-712	-401	-946	-2688	-479	-872	-278	-134	270	-796	-555	-559	-510	209	-602	-938	-764	-541	-884	-1305
1877	-27	11	-26	-127	65	42	151	89	11	18	-48	14	11	226	109	163	-25	-17	-73	134	59	-102	-218	105	162	30	46	-26	-204	55	8	105	179	21	2	37	-18	18	-63	99	54	208	-4	147	84	121	-109	153	-21
1878	95	101	122	59	165	39	26	92	136	53	124	60	122	78	98	70	85	98	65	182	93	62	81	145	53	141	148	101	40	125	157	120	123	123	86	19	87	47	88	30	213	174	131	258	-19	319	-25	62	67
1879	41	45	-34	-57	149	-69	35	233	64	138	41	-107	86	-5	61	89	60	128	121	266	38	167	32	131	346	111	62	12	57	308	168	52	297	-15	180	59	63	-10	-34	62	166	143	130	102	17	211	116	96	492
1880	23	-190	-481	-265	1	-398	398	-935	-308	114	-373	-68	-147	-32	224	461	-427	384	-260	738	398	24	-385	71	-275	609	409	1086	351	-81	25	-303	1145	-39	141	157	-200	148	60	93	365	203	91	-19	524	370	462	-518	105
1881	-23	-87	-22	-28	34	-101	-5	-14	47	-143	20	-70	57	-57	20	-48	-133	-54	-1	39	0	0	39	2	-70	-107	-220	-16	-136	48	-94	-12	-243	-4	52	103	148	25	4	-70	-7	20	127	29	9	-97	-81	-92	-64
1882	303	1358	254	-304	-86	1168	-233	-247	336	498	-376	107	-97	820	76	36	375	22	-180	205	-124	-102	425	-205	-229	66	34	-65	68	250	107	-177	394	-125	-96	502	78	49	239	-39	453	163	-166	2090	359	553	180	1537	1481
1883	472	564	479	357	517	158	295	223	333	285	464	275	334	324	423	341	511	346	267	506	108	461	214	300	220	197	253	465	166	334	363	525	274	161	350	140	99	187	170	647	602	141	544	535	62	198	-2	452	175
1884	-592	-300	-580	-1422	-183	-485	-722	-784	-481	-392	-276	-510	-337	-428	-377	-476	-555	-615	-132	-750	-368	-400	-545	-253	-198	-316	-1290	-395	-1229	-410	-439	-361	-756	-311	-687	-326	-843	-238	-431	-338	-263	-706	-125	-194	-773	-790	-330	-404	-942
1885	-126	50	70	-174	222	-103	-173	-256	387	55	187	-262	32	1	156	8	107	-38	-73	202	-127	211	-115	93	-115	-129	42	-140	-332	-84	-155	16	-266	-20	-201	57	-103	-15	-173	-92	-34	107	109	-40	19	-149	-45	-111	-358
1886	190	84	142	102	199	23	188	122	190	119	118	133	121	85	146	76	158	65	53	158	24	79	5	157	54	61	54	176	87	125	92	107	125	73	81	124	111	145	49	103	105	192	276	81	112	79	40	3	98
1887	-258	-302	-358	-546	-137	-529	-510	-412	-339	-233	-259	-264	-137	-328	-190	-182	-80	-204	-312	-198	-183	-268	-283	-169	-219	-136	-214	-231	-225	-235	-65	-198	-415	-211	-269	-235	-309	-138	-337	-162	-189	-176	-126	-230	-339	-270	-447	-327	-425
1888	207	245	242	147	87	67	225	239	183	282	178	93	189	176	144	212	307	79	189	210	76	105	102	172	-8	34	267	120	93	178	172	132	115	53	141	195	229	127	-3	99	205	290	336	258	24	151	35	54	100
1889	-69	-40	-348	-276	-79	-16	-230	-725	-214	-82	-277	-51	-58	-114	-151	-44	-48	-100	-57	-198	-184	-34	-144	-35	-169	-197	-384	-700	-1	-322	-142	-287	-71	-104	-384	-111	-246	64	-125	-248	-247	57	-200	-322	-124	-159	-338	-141	-351
1890	118	36	35	78	174	44	109	76	61	-22	-83	-10	30	14	-23	-38	-30	0	65	-4	2	91	94	-72	-1	-43	-79	171	43	69	94	22	92	3	-36	34	81	44	40	-14	73	-51	2	-20	24	41	94	51	-9
1891	923	1333	919	271	756	627	601	329	970	746	749	370	701	935	875	576	593	612	690	1525	884	596	319	773	391	685	496	492	279	1005	611	973	683	596	399	456	365	304	312	648	1178	1646	770	1036	591	661	416	785	384
1892	553	359	783	-123	-71	-7	208	646	551	-10	489	155	146	314	27	100	134	200	22	-214	103	630	6075	162	484	114	333	439	-153	-194	-180	57	-76	-95	124	-81	-178	258	108	205	-9	11	-8	376	54	339	-88	587	509
1893	-20	-84	8786	-62	-46	4957	42	-32	818	4255	2502	-5	-175	7	-60	-57	-4	-84	-23	-146	-3	-99	6583	-283	-170	-70	-123	-123	30	8	-77	-152	-366	-1	-64	-192	-93	-10	23	33	-71	43	12	-115	12	-61	10	-142	-40
1894	-331	-388	-880	-532	-198	-160	-383	-751	-264	-410	-333	107	-165	-289	-261	-354	-340	-237	-200	-225	-176	-239	-169	-201	759	-320	-751	-292	-267	-253	-69	-431	-817	-217	-40	-93	-213	-70	-49	-78	-334	-196	40	-126	-279	103	27	-406	-348
1895	143	244	401	229	86	167	225	298	431	339	215	215	153	138	140	195	87	60	154	154	196	41	186	239	124	222	330	280	122	-6	161	138	106	98	117	75	1	15	30	32	149	63	129	85	9	319	-48	249	177
1896	180	180	337	103	134	188	181	274	160	224	155	150	206	149	142	145	145	103	102	208	123	100	131	217	141	168	298	200	150	66	67	358	206	18	177	11	58	108	102	175	286	32	148	138	94	208	27	267	192
1897	1513	2221	2239	1235	2008	1515	1450	1185	2347	2095	1388	911	3014	1858	2533	1977	3582	838	1503	4536	2601	244	1195	2688	1322	1645	1411	866	1118	1601	2097	2336	1816	3050	1485	3537	1740	1423	892	792	1565	3611	2553	652	1537	1578	856	1182	1065
1898	-30	27	68	-6	-46	120	-70	-202	-47	-115	-61	-57	-136	-26	186	15	113	-187	-56	48	92	-86	-87	21	-92	-68	-115	-74	-89	-82	-37	-76	-133	-82	-64	-72	-87	-82	303	-57	-47	13	-67	-39	-137	-151	-12	-185	-139
1899	178	239	278	130	156	238	164	250	322	124	179	126	204	432	171	464	426	131	334	543	455	171	229	196	195	297	206	275	442	146	216	362	205	194	300	329	258	177	249	200	149	94	299	137	129	481	160	305	199
1900	248	186	180	607	173	213	176	166	65	231	313	135	185	48	125	405	-77	334	209	23	248	260	39	307	122	139	541	516	418	114	163	227	521	62	38	88	42	50	122	226	107	-21	263	181	194	432	96	410	379
1901	82	38	37	63	1	65	-57	100	33	89	-9	10	3	50	-3	30	21	46	56	-3	-27	19	24	16	35	21	161	82	60	96	25	-30	-2	36	40	72	61	132	68	5	9	67	9	-4	-32	61	76	151	79
1902	2187	6	5	123	95	51	221	85	-4	-35	-124	-80	351	-146	726	643	-260	-32	184	1762	11	23	66	48	18	111	70	506	54	102	105	139	37	175	874	2189	309	63	122	43	190	2	193	-61	42	875	165	-162	-24
1903	856	856	1186	1179	1496	608	814	755	1405	1029	801	434	895	1203	1786	1173	1465	1180	1095	2689	1661	549	594	907	947	654	849	806	655	742	668	1112	1048	776	824	401	1043	698	563	462	573	1530	699	436	723	543	401	508	509
1904	76	0	139	-30	138	-28	-136	-239	-46	60	-23	43	55	-2	34	18	197	21	-69	223	89	45	45	11	-26	47	29	-43	5	-88	-14	44	-314	28	120	-361	-564	57	-29	-35	-55	55	-3	43	-12	87	81	-165	-91
1905	287	39	364	252	205	49	236	367	298	140	-1	18	73	175	101	184	274	123	147	237	118	241	41	170	147	177	339	166	23	178	46	110	349	29	173	-123	-58	60	60	73	115	24	111	104	117	226	5	191	206
1906	190	83	125	219	473	56	117	-119	137	10	-69	-10	491	100	457	196	166	114	257	478	167	-99	43	410	77	293	46	-19	-65	105	332	349	-76	515	233	195	137	69	92	165	65	541	342	171	-24	159	20	31	69
1907	-284	-192	-238	-186	-66	-24	-247	-130	7	0	-92	-192	35	-147	-48	-59	-74	-74	-32	-110	14	-61	-281	-237	-192	-148	-231	-53	-114	-124	-195	-158	-65	-158	-124	-136	-267	-235	-108	-177	-81	-228	-156	21	-12	-79	-198	-31	-64
1908	739	623	857	662	527	337	655	691	604	400	592	330	551	488	463	471	564	444	417	824	331	614	324	553	518	497	959	632	565	579	411	657	1047	200	367	278	406	272	310	521	677	596	529	452	409	700	493	753	541
1909	3863	511	1952	6127	2547	1804	1129	1412	5817	769	1704	363	1515	3854	4436	2206	754	27	473	4409	1536	678	2103	1478	5653	2281	503	939	502	559	508	1200	6273	7097	1144	1695	1479	1594	1169	2810	2486	1968	5448	479	664	1060	376	517	459
1910	2987	130	303	345	502	257	494	253	293	279	610	132	894	336	610	271	568	553	348	898	515	481	155	542	200	386	352	589	443	338	434	1103	465	313	524	1654	621	337	349	695	677	551	1115	204	479	419	533	347	420
1911	-21	238	333	7	378	24	126	28	125	157	173	57	615	458	442	-13	616	-46	86	710	460	-6	-3	-55	232	6	84	31	57	1050	693	860	-64	36	819	167	353	89	3	237	157	69	786	62	-57	141	58	227	396
1912	296	95	190	269	212	177	235	70	131	198	281	189	144	260	301	200	146	159	204	294	264	176	167	221	52	67	104	168	125	48	144	268	94	233	139	102	119	125	111	112	125	172	308	235	119	306	155	284	146
1913	140	49	278	171	618	90	131	-95	342	113	74	28	221	5	555	227	53	115	171	575	113	197	144	365	339	698	9	330	70	403	111	342	88	186	581	213	471	235	211	33	262	268	553	9	132	169	340	98	194
1914	-241	-187	-361	-305	-206	-144	-273	-404	-224	-179	-186	-172	-186	-263	-120	-292	-311	-176	-187	-246	-193	-103	-222	-293	-217	-163	-388	-190	-162	-222	-153	-209	-621	-134	-165	-189	-202	-161	-151	-181	-143	-113	-215	-213	-124	-177	-73	-203	-293
1915	201	76	203	107	62	-5	82	118	58	31	168	76	75	178	-152	-151	63	730	38	267	146	252	169	170	168	121	-90	210	191	163	77	46	74	-67	67	17	-256	18	-111	-1	75	-78	62	85	102	-36	132	115	74
1916	206	193	303	-4	376	40	129	2	254	83	186	110	133	166	148	169	332	205	3	32	144	196	212	47	188	92	245	246	127	181	168	102	146	-21	134	54	109	11	52	86	230	208	115	163	-14	260	88	225	216
1917	97	224	232	189	342	42	154	17	233	85	185	33	74	336	330	183	-75	53	161	485	276	124	56	351	92	100	68	-2	109	131	182	109	31	234	43	102	15	116	225	129	73	435	230	224	-32	54	104	112	2
1918	-23	-4	74	-6	41	-46	13	-61	83	30	-16	31	52	25	42	-3	56	52	18	100	43	35	75	27	-1	3	79	19	35	37	-50	39	12	-36	16	-41	-13	-1	0	-20	6	24	14	-13	82	46	-81	8	12
1919	586	273	429	261	159	362	344	352	1322	178	350	171	325	383	99	250	113	143	216	1099	163	172	239	251	652	225	330	316	292	192	323	498	310	139	266	158	114	363	208	237	166	322	1187	271	102	666	238	510	471
1920	189	5569	1367	355	687	371	369	196	2827	502	178	350	202	10298	190	305	1272	28	208	182	138	95	284	799	281	114	225	7	2377	222	214	316	1086	86	403	66	49	112	185	253	245	1627	264	539	167	164	137	693	456
1921	1338	1230	2756	457	1917	1529	917	1089	2910	654	530	247	2141	1092	1321	1581	1692	837	802	4392	578	329	651	2298	563	780	661	398	957	499	540	2664	810	1446	471	512	250	502	157	264	675	1952	1713	684	504	852	274	641	723
1922	2676	2983	2172	2167	3648	1817	3703	1012	4193	1562	1825	1214	3047	2695	2638	1794	2407	2544	2095	3655	2800	1195	894	6132	1089	2474	1275	2080	1916	944	1689	2616	1950	4245	1944	2570	1688	2092	1706	3825	3250	9321	5471	5307	2721	1400	1487	2055	1464
1923	-835	-409	-897	-316	-192	-785	-826	-1236	-794	-578	-631	-594	-382	-656	-485	-410	-1335	-554	-356	-648	-432	-609	-630	-582	-720	-572	-1084	-888	-827	-588	-416	-539	-1246	-367	-612	-1058	-1269	-503	-329	-526	-462	-623	-486	-426	-274	-597	-228	-806	-764
1924	296	157	214	87	79	94	13	125	97	109	42	171	441	116	140	66	54	128	75	138	13	103	151	58	237	47	139	224	259	485	420	292	115	123	163	293	313	99	-83	121	218	250	312	51	114	226	104	168	163
1925	-13	33	183	62	30	74	-236	89	-7	39	-9	67	60	69	46	-25	76	20	50	69	31	92	9	72	93	50	103	226	488	111	39	2	105	-76	45	87	109	21	43	73	51	103	6	8	12	5	-12	83	88
1926	31	76	42	71	15	30	48	-22	20	45	16	70	-3	35	40	48	20	58	37	17	38	65	43	-19	74	29	31	91	-40	-8	134	19	45	-14	43	13	23	2	38	35	31	17	-15	-16	64	18	109	198	-7
1927	8	428	206	-11	-18	30	-52	-70	109	160	16	10	-2	189	60	17	47	58	-14	148	-56	107	-30	-4	43	60	-21	-43	1	38	-31	-5	19	48	38	-25	-34	5	40	112	349	-30	32	6	-29	7	-20	-49	-115
1928	3828	3021	7247	3780	3563	4890	3330	4213	7230	5052	3352	2290	4751	2346	3347	3207	6633	2143	2291	5933	2306	2131	4677	3182	2910	2648	2818	5308	2364	2158	3042	3994	5423	2678	2023	4112	2462	1520	1229	822	4559	3691	1700	2248	2374	3038	2714	1647	2195
1929	888	429	1148	581	416	650	488	1060	815	724	559	291	623	592	319	788	723	499	509	570	422	584	708	487	493	644	1262	825	800	658	514	694	1057	400	346	515	461	525	470	417	578	422	502	502	659	808	655	732	959
[truncated: 5,200 more rows]
[truncated: 23 more columns]
